# Supplementary material for: Follow the Footsteps of Leonardo Fea: An Example of an Integrative Revision of Freshwater Mussel Taxa Described from the Former British Burma (Myanmar)
Source: Hindawi journal article supplement (doi:10.1155/2022/6600359), 2022-05-27
Supplement: f1 [file 6600359.f1.zip]

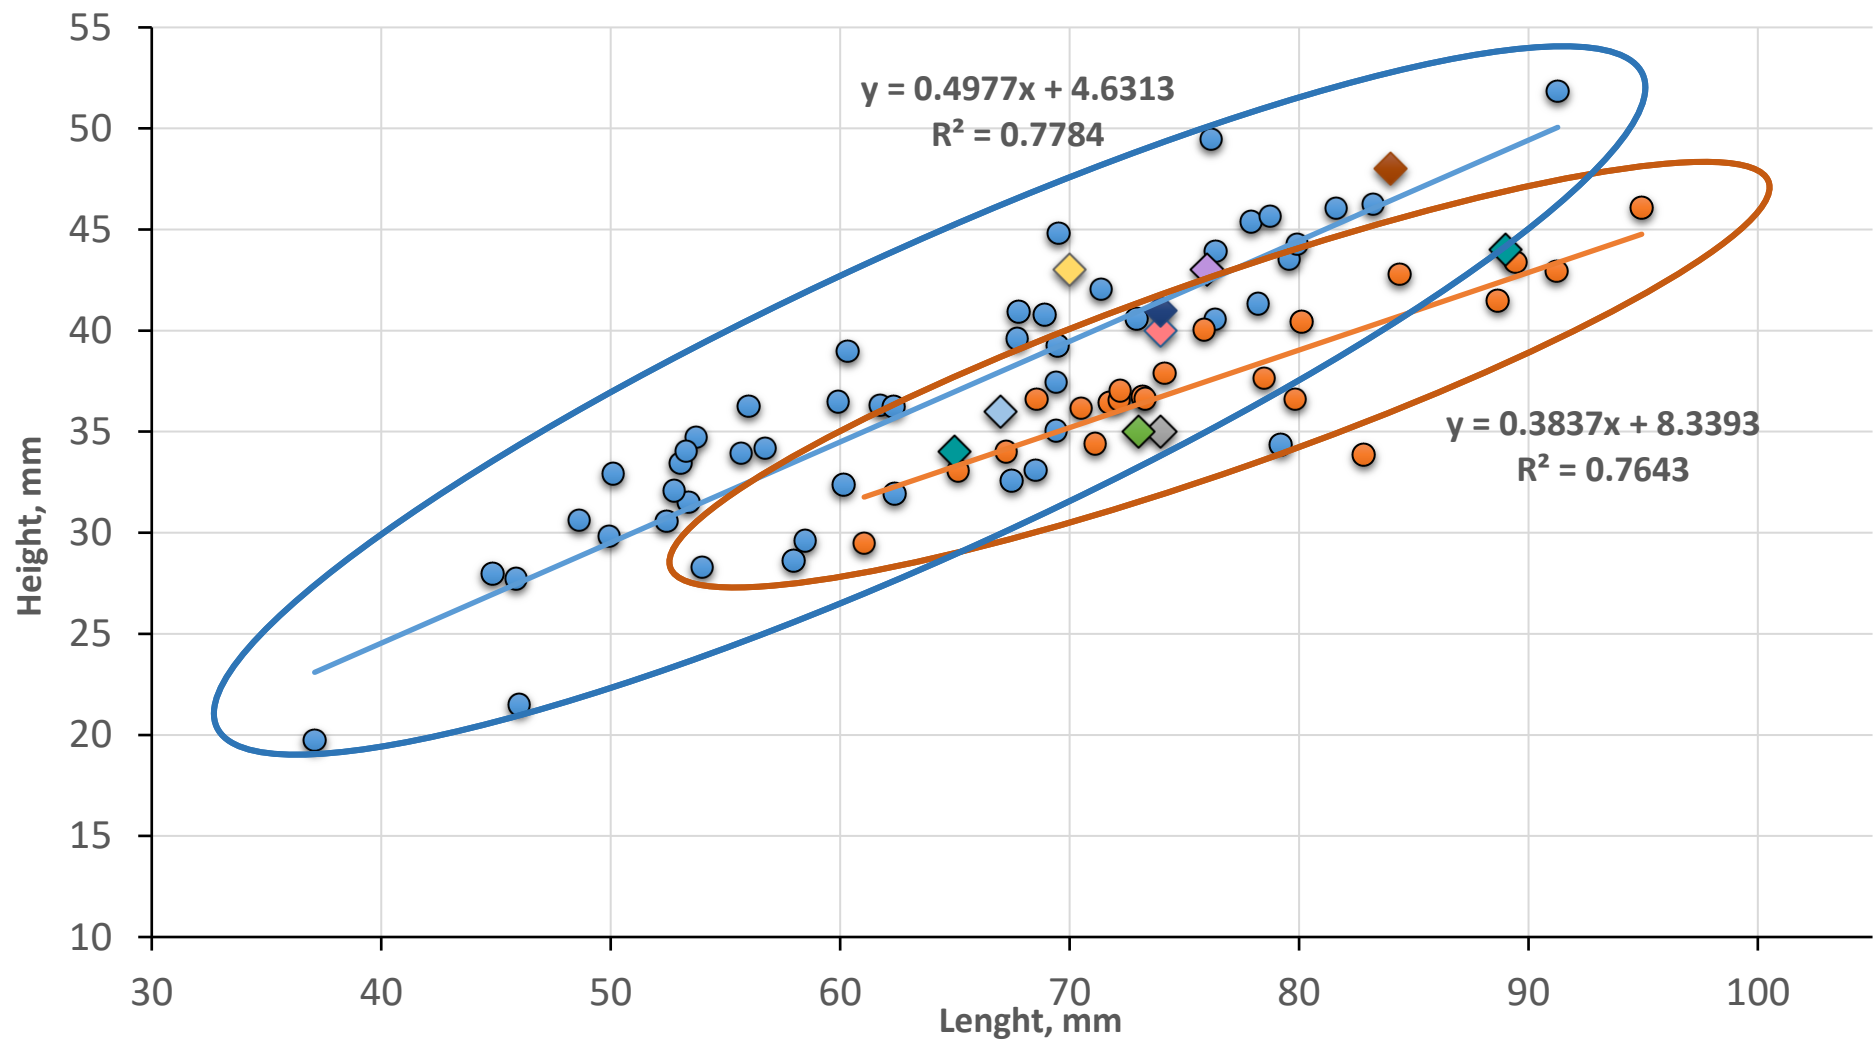

- |                                                   |                                                |                                                |
|---------------------------------------------------|------------------------------------------------|------------------------------------------------|
| ● <i>Lamellidens</i>                              | ● <i>Trapezidens</i>                           | ◇ <i>Unio gianelli</i>                         |
| ◇ <i>Unio gianelli</i> var. <i>degener</i>        | ◇ <i>Unio protensus</i>                        | ◇ <i>Unio protensus</i> var. <i>ellipticus</i> |
| ◇ <i>Unio protensus</i> var. <i>obtusatus</i>     | ◇ <i>Unio pulcher</i> var. <i>ponderosulus</i> | ◇ <i>Unio pulcher</i>                          |
| ◇ <i>Unio pulcher</i> var. <i>lamellatiformis</i> | ◇ <i>Unio generosus</i> var. <i>delapsus</i>   |                                                |
