# Supplementary material for: Follow the Footsteps of Leonardo Fea: An Example of an Integrative Revision of Freshwater Mussel Taxa Described from the Former British Burma (Myanmar)
Source: Hindawi journal article supplement (doi:10.1155/2022/6600359), 2022-05-27
Supplement: f1 [file 6600359.f1.zip]

# Follow the footsteps of Leonardo Fea: An example of an integrative revision of freshwater mussel taxa described from the former British Burma (Myanmar)

Ivan N. Bolotov, Ekaterina S. Konopleva, Ilya V. Vikhrev, Than Win, Mikhail Yu. Gofarov, Alexander V. Kondakov, Alena A. Tomilova, Zau Lunn, Nyein Chan, Rajeev Pasupuleti & Nalluri V. Subba Rao

## Supporting information

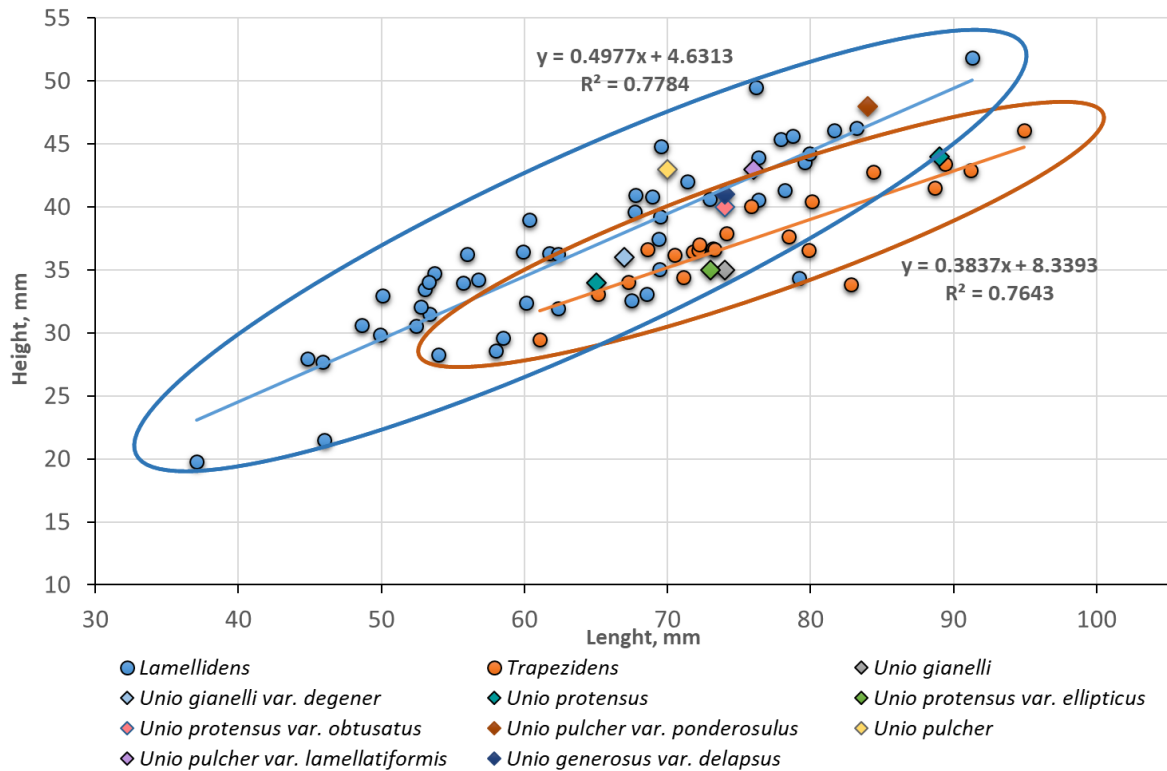

**Figure S1.** Shell proportions of *Lamellidens* and *Trapezidens* based on the shell elongation index (SEI). The bold lines show a 95 % confidence ellipses.

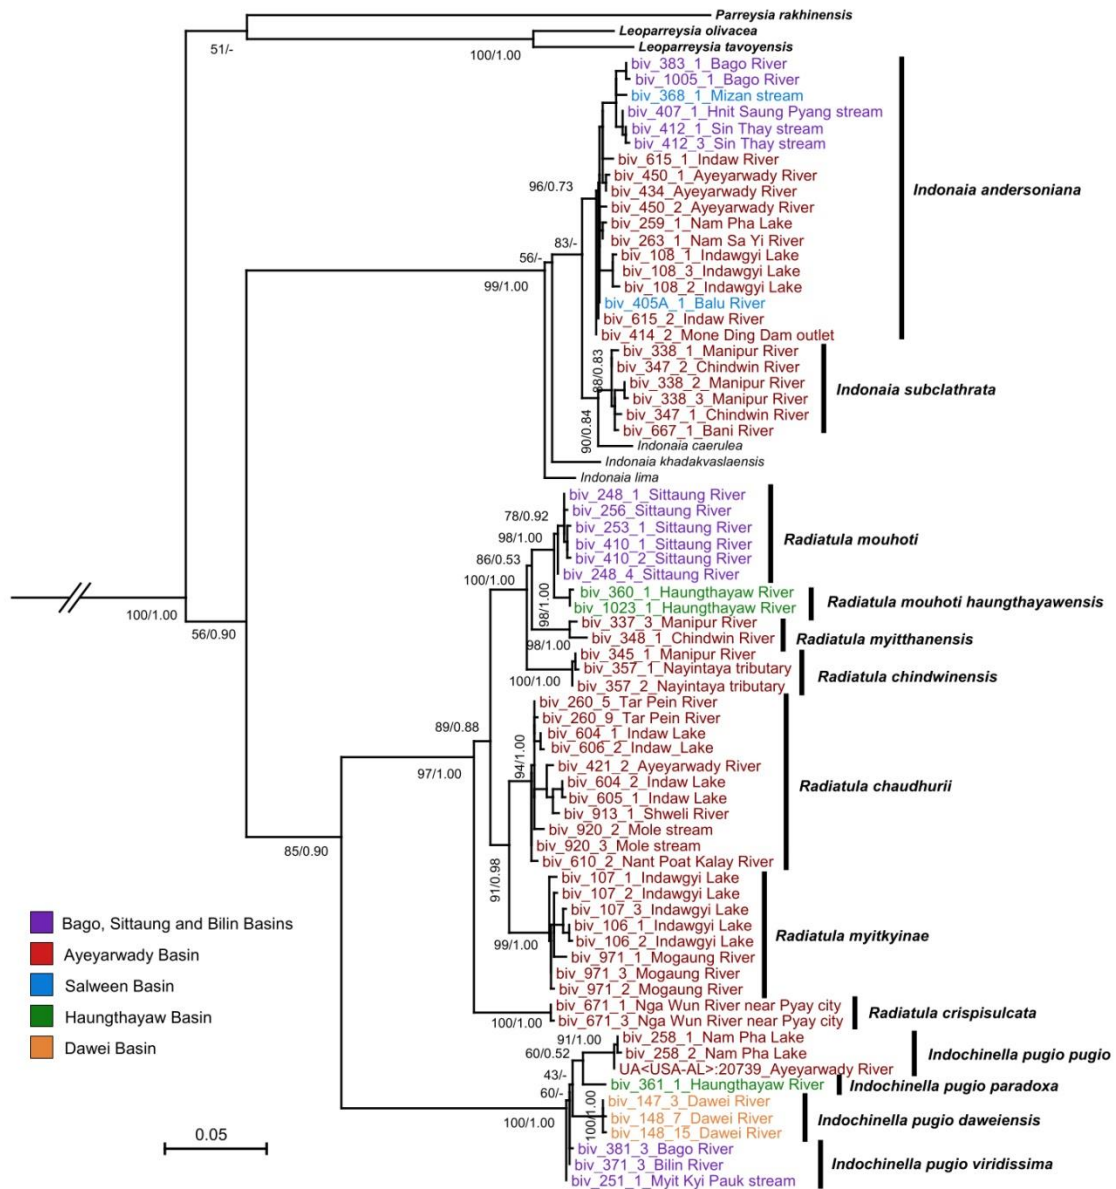

**Figure S2.** Maximum likelihood phylogeny of the mitochondrial data set (three codons of *COI*) of the Indocheinellini from Myanmar. Scale bar indicates the branch lengths. Black numbers near nodes are ML ultrafast bootstrap support values (BS) / Bayesian Posterior Probabilities (BPP). River basins are shown by different colors. Outgroup (*Gibbosula laosensis*, *Margaritifera dahurica*, *Parreysia rakhinensis*, *Leoparreysia olivacea*, and *L. tavoyensis*) is not shown.

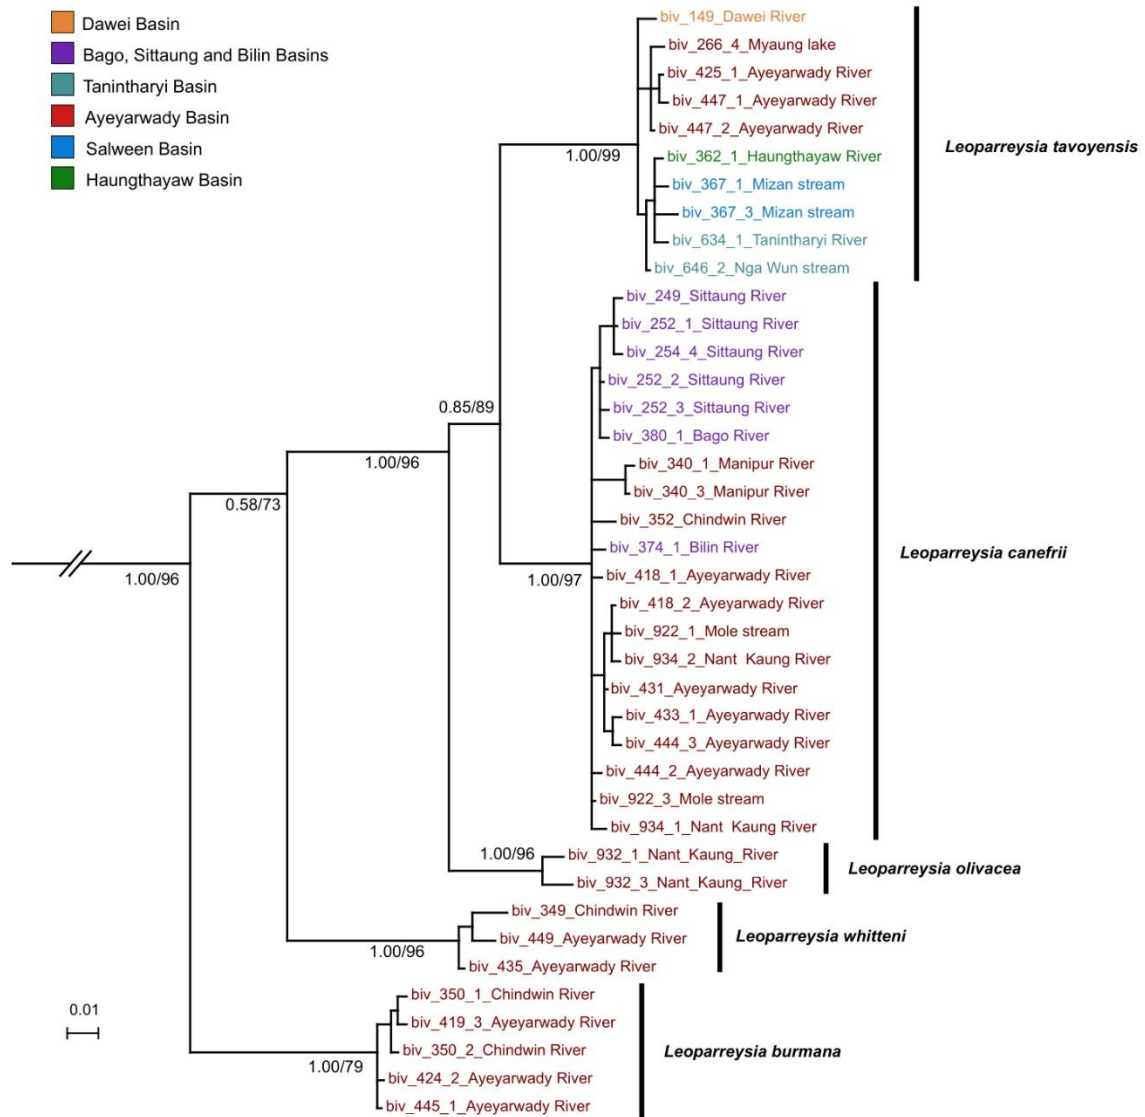

**Figure S3.** Maximum likelihood phylogeny of the mitochondrial data set (three codons of *COI*) of the Leopardreysiini from Myanmar. Scale bar indicates the branch lengths. Black numbers near nodes are ML ultrafast bootstrap support values (BS) / Bayesian Posterior Probabilities (BPP). River basins are shown by different colors. Outgroup (*Gibbosula laosensis*, *Margaritifera dahurica*, and *Parreysia rakhinensis*) is not shown.

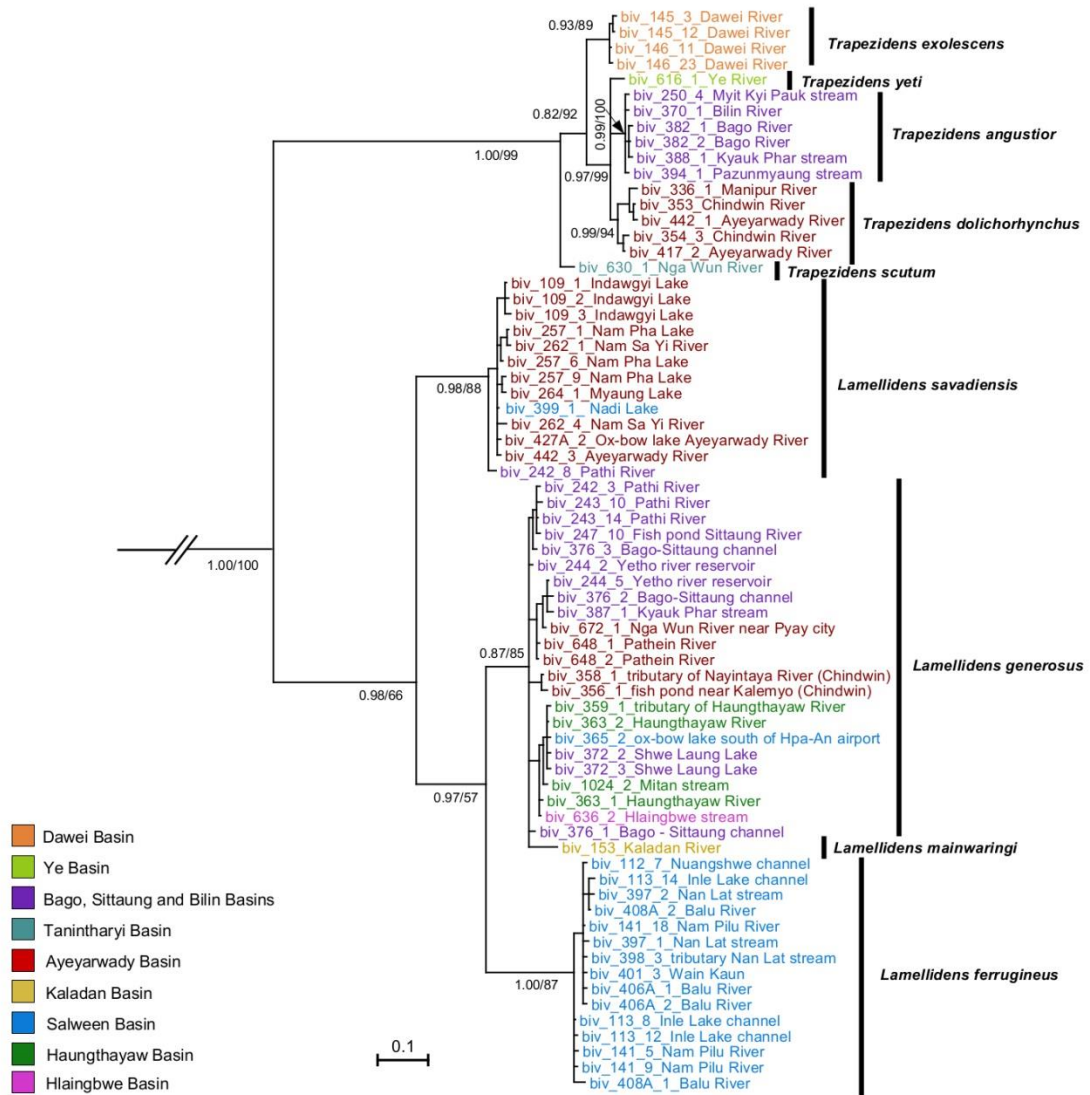

**Figure S4.** Bayesian phylogeny of the mitochondrial data set (three codons of *COI*) of the Lamellidentini from Myanmar. Scale bar indicates the branch lengths. Black numbers near nodes are Bayesian Posterior Probabilities (BPP) / ML ultrafast bootstrap support values (BS). River basins are shown by different colors. Outgroup (*Gonidea angulata*, *Leguminaia wheatleyi*, *Potomida littoralis*, and *Lamprotula leai*) is not shown.

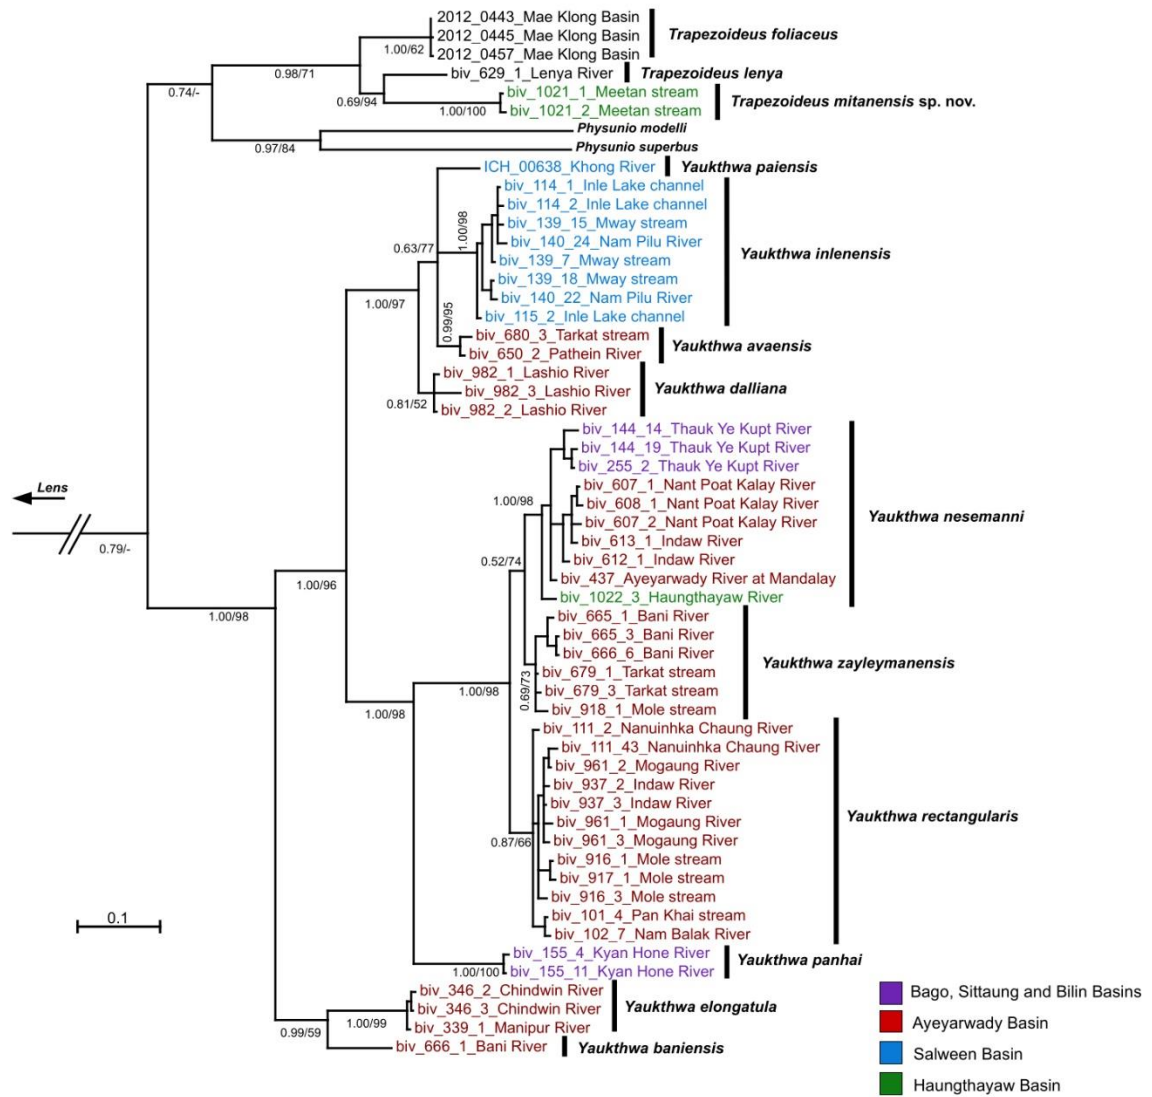

**Figure S5.** Bayesian phylogeny of the mitochondrial data set (three codons of *COI*) of the Contradentini from Myanmar. Scale bar indicates the branch lengths. Black numbers near nodes are Bayesian Posterior Probabilities (BPP) / ML ultrafast bootstrap support values (BS). River basins are shown by different colors. Outgroup (*Gonidea angulata*, *Leguminaia wheatleyi*, *Potomida littoralis*, and *Lamprotula leai*) and the haplotypes of the *Lens* genus are not shown.

**Table S1.** List of sequences of Unionidae from South-East Asia used in this study.

| Species                                               | Locality                                                                | Specimen<br>Voucher* | NCBI's GenBank acc. nos. |          |          | Latitude | Longitude |
|-------------------------------------------------------|-------------------------------------------------------------------------|----------------------|--------------------------|----------|----------|----------|-----------|
|                                                       |                                                                         |                      | COI                      | 16S rRNA | 28S rRNA |          |           |
| UNIONIDAE Rafinesque, 1820                            |                                                                         |                      |                          |          |          |          |           |
| Gonideinae Ortmann, 1916                              |                                                                         |                      |                          |          |          |          |           |
| Pseudodontini Frierson, 1927                          |                                                                         |                      |                          |          |          |          |           |
| Pseudodontina s. str.                                 |                                                                         |                      |                          |          |          |          |           |
| Pseudodon Gould, 1844                                 |                                                                         |                      |                          |          |          |          |           |
| Pseudodon sp.                                         | Myanmar:<br>Ayeyarwady Basin, a<br>tributary of Lake<br>Indawgyi        | RMBH: biv<br>110/5   | KX865858                 | KX865859 | KX865860 | 25.1209  | 96.2812   |
| Pseudodon sp.                                         | Myanmar:<br>Ayeyarwady Basin, a<br>tributary of Lake<br>Indawgyi        | RMBH: biv<br>110/10  | KX865629                 | KX865630 | KX865631 | 25.1209  | 96.2812   |
| Pseudodon sp.                                         | Myanmar:<br>Ayeyarwady Basin, a<br>tributary of Lake<br>Indawgyi        | RMBH: biv<br>110/11  | KX865730                 | KX865731 | KX865732 | 25.1209  | 96.2812   |
| P. bogani Bolotov,<br>Kondakov & Konopleva,<br>2017   | Myanmar: Sittaung<br>Basin, Kanni River                                 | RMBH: biv<br>241/4   | MF352216                 | MF352290 | MF352348 | 19.0545  | 96.5131   |
| P. bogani Bolotov,<br>Kondakov & Konopleva,<br>2017   | Myanmar: Sittaung<br>Basin, Kanni River                                 | RMBH: biv<br>241/5   | MF352217                 | MF352291 | MF352349 | 19.0545  | 96.5131   |
| P. bogani Bolotov,<br>Kondakov & Konopleva,<br>2017   | Myanmar: Sittaung<br>Basin, Kanni River                                 | RMBH: biv<br>241/8   | MF352218                 | MF352292 | MF352350 | 19.0545  | 96.5131   |
| P. manueli Konopleva,<br>Kondakov & Vikhrev,<br>2017  | Myanmar: Sittaung<br>Basin, Pyowne River                                | RMBH: biv<br>246/1   | MF352228                 | MF352300 | MF352358 | 18.9694  | 96.5309   |
| P. manueli Konopleva,<br>Kondakov & Vikhrev,<br>2017  | Myanmar: Sittaung<br>Basin, Pyowne River                                | RMBH: biv<br>246/3   | MF352229                 | MF352301 | MF352359 | 18.9694  | 96.5309   |
| P. manueli Konopleva,<br>Kondakov & Vikhrev,<br>2017  | Myanmar: Sittaung<br>Basin, Pyowne River                                | RMBH: biv<br>246/8   | MF352230                 | MF352302 | MF352360 | 18.9694  | 96.5309   |
| P. salweenianus (Gould,<br>1844)                      | Myanmar: Salween<br>Basin, unnamed<br>stream                            | RMBH: biv<br>639/1   | MN275037                 | MN307237 | MN307178 | 17.0292  | 97.8100   |
| P. salweenianus (Gould,<br>1844)                      | Myanmar: Salween<br>Basin, Hlangbwe<br>Stream                           | RMBH: biv<br>674/1   | MN275040                 | MN307238 | MN307179 | 17.0292  | 97.8099   |
| P. salweenianus (Gould,<br>1844)                      | Myanmar: Salween<br>Basin, Haungthayaw<br>River, Donthami Maw<br>Stream | RMBH: biv<br>1025    | OL597609                 | n/a      | n/a      | 16.0026  | 98.3796   |
| P. kayinensis Bolotov et<br>al., 2020                 | Myanmar: Ataran<br>Basin, Winyaw River                                  | RMBH: biv<br>618/3   | MN275045                 | MN307240 | MN307181 | 15.6685  | 97.9496   |
| P. kayinensis Bolotov et<br>al., 2020                 | Myanmar: Ataran<br>River                                                | RMBH: biv<br>637/1   | MN275046                 | MN307241 | MN307182 | 15.6132  | 98.2363   |
| P. kayinensis Bolotov et<br>al., 2020                 | Myanmar: Salween<br>Basin, unnamed<br>Stream                            | RMBH: biv<br>638/1   | MN275049                 | MN307242 | MN307183 | 17.0292  | 97.8100   |
| P. kayinensis Bolotov et<br>al., 2020                 | Myanmar: Salween<br>Basin, Haungthayaw<br>River, Donthami Maw<br>Stream | RMBH: biv<br>1026/1  | OL597610                 | n/a      | n/a      | 16.0026  | 98.3796   |
| P. kayinensis Bolotov et<br>al., 2020                 | Myanmar: Salween<br>Basin, Haungthayaw<br>River, Donthami Maw<br>Stream | RMBH: biv<br>1026/2  | OL597611                 | n/a      | n/a      | 16.0026  | 98.3796   |
| P. kayinensis Bolotov et<br>al., 2020                 | Myanmar: Salween<br>Basin, Haungthayaw<br>River, Donthami Maw<br>Stream | RMBH: biv<br>1026/3  | OL597612                 | n/a      | n/a      | 16.0026  | 98.3796   |
| Pilsbryoconchina Bolotov, Vikhrev & Tumpeesuwan, 2017 |                                                                         |                      |                          |          |          |          |           |
| Monodontina Conrad, 1853                              |                                                                         |                      |                          |          |          |          |           |
| Monodontina lenyanensis<br>Bolotov et al., 2020       | Myanmar: Lenya<br>Basin, 14 mile stream                                 | RMBH: biv<br>628/1   | MN275054                 | MN307245 | MN307186 | 11.3508  | 99.1093   |
| M. lenyanensis Bolotov et<br>al., 2020                | Myanmar: Lenya<br>Basin, 14 mile stream                                 | RMBH: biv<br>628/2   | MN275055                 | MN307246 | MN307187 | 11.3508  | 99.1093   |
| M. lenyanensis Bolotov et<br>al., 2020                | Myanmar: Lenya<br>Basin, 14 mile stream                                 | RMBH: biv<br>628/3   | MN275056                 | MN307247 | MN307188 | 11.3508  | 99.1093   |

|                                                                 |                                                                                          |                  |          |          |          |         |          |
|-----------------------------------------------------------------|------------------------------------------------------------------------------------------|------------------|----------|----------|----------|---------|----------|
| <b><i>Sundadontina</i> Bolotov et al., 2020</b>                 |                                                                                          |                  |          |          |          |         |          |
| <i>Sundadontina tanintharyiensis</i> Bolotov et al., 2020       | Myanmar: Lenya Basin, Nauk Pyan Stream                                                   | RMBH: biv 643/4  | MN275057 | MN307248 | MN307189 | 11.7620 | 99.1124  |
| <b>Contradentini Modell, 1942</b>                               |                                                                                          |                  |          |          |          |         |          |
| <b><i>Lens</i> Simpson, 1900</b>                                |                                                                                          |                  |          |          |          |         |          |
| <i>Lens contradens</i> (Lea, 1838)                              | West Malaysia: Pahang River                                                              | ANSP:389059      | DQ191411 | n/a      | AF400692 | n/a     | n/a      |
| <i>L. micropterus</i> (Morelet, 1866)                           | Cambodia: Mekong Basin                                                                   | UMMZ:304652      | KP795034 | KP795054 | KP795016 | n/a     | n/a      |
| <i>L. eximius</i> (Lea, 1856)                                   | Thailand: Mekong Basin, Chi River                                                        | RMBH: biv 127 /1 | KX865936 | n/a      | KX865807 | 16.2158 | 103.2526 |
| <i>L. comptus</i> (Deshayes & Jullien, 1874)                    | Laos: Mekong Basin, Nam Long River                                                       | RMBH: biv 182/3  | KX865930 | KX865684 | KX865801 | 21.7700 | 102.1863 |
| <i>L. misellus</i> (Morelet, 1865)                              | Thailand: Chao Phraya Basin, Ping River                                                  | 2014-0685        | MH345986 | MH346026 | MH346006 | 19.2859 | 98.9680  |
| <i>L. pallegoixi</i> (Sowerby, 1867)                            | Thailand: Mekong Basin, Mun River drainage, Pao River                                    | 2014-0614        | MH345989 | MH346029 | MH346009 | 16.3402 | 103.5758 |
| <i>L. rolfbrandti</i> (Jeratthitikul & Panha, 2021)             | Thailand: Huai Luang River at Don Kloi Village, Phibun Rak District, Udon Thani Province | UNI0229          | MG582018 | n/a      | n/a      | n/a     | n/a      |
| <i>L. maenamensis</i> Pfeiffer et al., 2021                     | Thailand: Mekong Basin                                                                   | MUMNHUNIO 946    | MG582015 | n/a      | n/a      | n/a     | n/a      |
| <i>L. novoselovi</i> (Konopleva et al. 2019)                    | Laos: Mekong Basin, a tributary of Nam Fa River near Vieng Phou Kha                      | RMBH: biv 202/2  | KY561630 | KY561645 | KY561662 | 20.6820 | 101.0794 |
| <b><i>Trapezoideus</i> Simpson, 1900</b>                        |                                                                                          |                  |          |          |          |         |          |
| <i>Trapezoideus foliaceus</i> (Gould, 1843)                     | Thailand: Mae Klong Basin, Pracham Mai River                                             | 2012-0443        | MH345979 | MH346019 | MH345999 | 14.6598 | 98.5342  |
| <i>T. foliaceus</i> (Gould, 1843)                               | Thailand: Mae Klong Basin, Pracham Mai River                                             | 2012-0445        | MH345980 | MH346020 | MH346000 | 14.6598 | 98.5342  |
| <i>T. foliaceus</i> (Gould, 1843)                               | Thailand: Mae Klong Basin, Pracham Mai River                                             | 2012-0457        | MH345981 | MH346021 | MH346001 | 15.2232 | 98.4465  |
| <i>T. lenya</i> Bolotov et al., 2020                            | Myanmar: Lenya Basin, 14 mile stream                                                     | RMBH: biv 629/1  | MN275067 | MN307256 | MN307197 | 11.3508 | 99.1093  |
| <i>T. lenya</i> Bolotov et al., 2020                            | Myanmar: Lenya Basin, 14 mile stream                                                     | RMBH: biv 629/2  | MN275068 | MN307257 | MN307198 | 11.3508 | 99.1093  |
| <i>T. lenya</i> Bolotov et al., 2020                            | Myanmar: Lenya Basin, 14 mile stream                                                     | RMBH: biv 629/3  | MN275069 | MN307258 | MN307199 | 11.3508 | 99.1093  |
| <i>T. mitanensis</i> <b>sp. nov.</b>                            | Myanmar: Haungthayaw Basin, Mitan Stream                                                 | RMBH: biv 1021/1 | OL597613 | ON142670 | ON171238 | 16.0019 | 98.4064  |
| <i>T. mitanensis</i> <b>sp. nov.</b>                            | Myanmar: Haungthayaw Basin, Mitan Stream                                                 | RMBH: biv 1021/2 | OL597614 | OL598370 | OL598384 | 16.0019 | 98.4064  |
| <i>T. mitanensis</i> <b>sp. nov.</b>                            | Myanmar: Haungthayaw Basin, Mitan Stream                                                 | RMBH: biv 1021/3 | OL597615 | n/a      | n/a      | 16.0019 | 98.4064  |
| <i>T. mitanensis</i> <b>sp. nov.</b>                            | Myanmar: Haungthayaw River                                                               | RMBH: biv 1022/1 | OL597616 | OL598371 | OL598385 | 15.9620 | 98.4152  |
| <i>T. mitanensis</i> <b>sp. nov.</b>                            | Myanmar: Haungthayaw River                                                               | RMBH: biv 1022/2 | OL597617 | OL598372 | OL598386 | 15.9620 | 98.4152  |
| <b><i>Physunio</i> Simpson, 1900</b>                            |                                                                                          |                  |          |          |          |         |          |
| <i>Physunio modelli</i> Brandt, 1974                            | Thailand: Mekong Basin, Chi River                                                        | RMBH: biv 125/2  | KX865883 | KX865654 | KX865754 | 16.2258 | 103.3007 |
| <i>P. superbus</i> (Lea, 1843)                                  | Malaysia                                                                                 | BIV1776          | KX051278 | n/a      | n/a      | n/a     | n/a      |
| <b><i>Yaukthwa</i> Konopleva et al., 2019</b>                   |                                                                                          |                  |          |          |          |         |          |
| <i>Yaukthwa nesemannii</i> (Konopleva, Vikhrev & Bolotov, 2017) | Myanmar: Sittaung Basin, Thauk Ye Kupt River                                             | RMBH: biv 144/14 | KX865906 | KX865663 | KX865777 | 19.3075 | 96.7219  |
| <i>Y. nesemannii</i> (Konopleva, Vikhrev & Bolotov, 2017)       | Myanmar: Sittaung Basin, Thauk Ye Kupt River                                             | RMBH: biv 144/25 | KX865907 | KX865664 | KX865778 | 19.3075 | 96.7219  |
| <i>Y. nesemannii</i> (Konopleva, Vikhrev & Bolotov, 2017)       | Myanmar: Sittaung Basin, Thauk Ye Kupt River                                             | RMBH: biv 144/19 | KX865908 | KX865665 | KX865779 | 19.3075 | 96.7219  |
| <i>Y. nesemannii</i> (Konopleva, Vikhrev & Bolotov, 2017)       | Myanmar: Sittaung Basin, Thauk Ye Kupt River                                             | RMBH: biv 255/2  | MF352254 | n/a      | MF352379 | 18.9840 | 96.4361  |



|                                                          |                                                               |                  |          |          |          |         |         |
|----------------------------------------------------------|---------------------------------------------------------------|------------------|----------|----------|----------|---------|---------|
| <i>Y. nesemanni</i> (Konopleva, Vikhrev & Bolotov, 2017) | Myanmar: Sittaung Basin, Thauk Ye Kupt River                  | RMBH: biv 255/3  | MF352255 | n/a      | MF352380 | 18.9840 | 96.4361 |
| <i>Y. nesemanni</i> (Konopleva, Vikhrev & Bolotov, 2017) | Myanmar: Sittaung Basin, Thauk Ye Kupt River                  | RMBH: biv 255/4  | MF352256 | n/a      | MF352381 | 18.9840 | 96.4361 |
| <i>Y. nesemanni</i> (Konopleva, Vikhrev & Bolotov, 2017) | Myanmar: Ayeyarwady Basin, Chindwin River                     | RMBH: biv 351    | OL597618 | n/a      | n/a      | 23.1499 | 94.3629 |
| <i>Y. nesemanni</i> (Konopleva, Vikhrev & Bolotov, 2017) | Myanmar: Sittaung Basin, Cho River                            | RMBH: biv 405/1  | OL597619 | n/a      | n/a      | 19.5069 | 96.5618 |
| <i>Y. nesemanni</i> (Konopleva, Vikhrev & Bolotov, 2017) | Myanmar: Sittaung Basin, Cho River                            | RMBH: biv 405/3  | OL597620 | n/a      | n/a      | 19.5069 | 96.5618 |
| <i>Y. nesemanni</i> (Konopleva, Vikhrev & Bolotov, 2017) | Myanmar: Ayeyarwady River near Mandalay                       | RMBH: biv 437    | OL597621 | n/a      | n/a      | 21.9574 | 96.0510 |
| <i>Y. nesemanni</i> (Konopleva, Vikhrev & Bolotov, 2017) | Myanmar: Ayeyarwady Basin, Nant Poat Kalay River              | RMBH: biv 607/1  | OL597622 | n/a      | n/a      | 24.2130 | 96.1089 |
| <i>Y. nesemanni</i> (Konopleva, Vikhrev & Bolotov, 2017) | Myanmar: Ayeyarwady Basin, Nant Poat Kalay River              | RMBH: biv 607/2  | OL597623 | n/a      | n/a      | 24.2130 | 96.1089 |
| <i>Y. nesemanni</i> (Konopleva, Vikhrev & Bolotov, 2017) | Myanmar: Ayeyarwady Basin, Nant Poat Kalay River              | RMBH: biv 607/3  | OL597624 | n/a      | n/a      | 24.2130 | 96.1089 |
| <i>Y. nesemanni</i> (Konopleva, Vikhrev & Bolotov, 2017) | Myanmar: Ayeyarwady Basin, Nant Poat Kalay River              | RMBH: biv 608/1  | OL597625 | n/a      | n/a      | 24.2130 | 96.1089 |
| <i>Y. nesemanni</i> (Konopleva, Vikhrev & Bolotov, 2017) | Myanmar: Ayeyarwady Basin, Nant Poat Kalay River              | RMBH: biv 608/2  | OL597626 | n/a      | n/a      | 24.2130 | 96.1089 |
| <i>Y. nesemanni</i> (Konopleva, Vikhrev & Bolotov, 2017) | Myanmar: Ayeyarwady Basin, Nant Poat Kalay River              | RMBH: biv 608/3  | OL597627 | n/a      | n/a      | 24.2130 | 96.1089 |
| <i>Y. nesemanni</i> (Konopleva, Vikhrev & Bolotov, 2017) | Myanmar: Ayeyarwady Basin, Indaw River near Sell Ywar village | RMBH: biv 612/1  | OL597628 | n/a      | n/a      | 24.2123 | 96.0819 |
| <i>Y. nesemanni</i> (Konopleva, Vikhrev & Bolotov, 2017) | Myanmar: Ayeyarwady Basin, Indaw River near Sell Ywar village | RMBH: biv 612/2  | OL597629 | n/a      | n/a      | 24.2123 | 96.0819 |
| <i>Y. nesemanni</i> (Konopleva, Vikhrev & Bolotov, 2017) | Myanmar: Ayeyarwady Basin, Indaw River near Sell Ywar village | RMBH: biv 612/3  | OL597630 | n/a      | n/a      | 24.2123 | 96.0819 |
| <i>Y. nesemanni</i> (Konopleva, Vikhrev & Bolotov, 2017) | Myanmar: Ayeyarwady Basin, Indaw River near Sell Ywar village | RMBH: biv 613/1  | OL597631 | n/a      | n/a      | 24.2123 | 96.0819 |
| <i>Y. nesemanni</i> (Konopleva, Vikhrev & Bolotov, 2017) | Myanmar: Ayeyarwady Basin, Indaw River near Sell Ywar village | RMBH: biv 613/2  | OL597632 | n/a      | n/a      | 24.2123 | 96.0819 |
| <i>Y. nesemanni</i> (Konopleva, Vikhrev & Bolotov, 2017) | Myanmar: Ayeyarwady Basin, Indaw River near Sell Ywar village | RMBH: biv 613/3  | OL597633 | n/a      | n/a      | 24.2123 | 96.0819 |
| <i>Y. nesemanni</i> (Konopleva, Vikhrev & Bolotov, 2017) | Myanmar: Haungthayaw River                                    | RMBH: biv 1022/3 | OL597634 | n/a      | n/a      | 15.9620 | 98.4152 |
| <i>Y. panhai</i> (Konopleva, Bolotov et Kondakov, 2017)  | Myanmar: Sittaung Basin, Kyan Hone River                      | RMBH: biv 138/4  | KX865909 | KX865666 | KX865780 | 19.5099 | 96.8226 |
| <i>Y. panhai</i> (Konopleva, Bolotov et Kondakov, 2017)  | Myanmar: Sittaung Basin, Kyan Hone River                      | RMBH: biv 138/7  | KX865910 | KX865667 | KX865781 | 19.5099 | 96.8226 |
| <i>Y. panhai</i> (Konopleva, Bolotov et Kondakov, 2017)  | Myanmar: Sittaung Basin, Kyan Hone River                      | RMBH: biv 138/12 | KX865913 | KX865670 | KX865784 | 19.5099 | 96.8226 |
| <i>Y. panhai</i> (Konopleva, Bolotov et Kondakov, 2017)  | Myanmar: Sittaung Basin, Kyan Hone River                      | RMBH: biv 155/4  | KX865911 | KX865668 | KX865782 | 19.5059 | 96.8280 |
| <i>Y. panhai</i> (Konopleva, Bolotov et Kondakov, 2017)  | Myanmar: Sittaung Basin, Kyan Hone River                      | RMBH: biv 155/11 | KX865914 | KX865671 | KX865785 | 19.5059 | 96.8280 |



|                                                         |                                                            |                  |          |          |          |         |         |
|---------------------------------------------------------|------------------------------------------------------------|------------------|----------|----------|----------|---------|---------|
| <i>Y. panhai</i> (Konopleva, Bolotov et Kondakov, 2017) | Myanmar: Sittaung Basin, Kyan Hone River                   | RMBH: biv 155/25 | KX865912 | KX865669 | KX865783 | 19.5059 | 96.8280 |
| <i>Y. inlenensis</i> Konopleva et al., 2019             | Myanmar: Salween Basin, Inle Lake Channel                  | RMBH: biv 114/1  | KX865915 | KX865672 | KX865786 | 20.4946 | 96.8772 |
| <i>Y. inlenensis</i> Konopleva et al., 2019             | Myanmar: Salween Basin, Inle Lake Channel                  | RMBH: biv 114/2  | KX865918 | KX865675 | KX865789 | 20.4946 | 96.8772 |
| <i>Y. inlenensis</i> Konopleva et al., 2019             | Myanmar: Salween Basin, Inle Lake Channel                  | RMBH: biv 114/3  | KX865916 | KX865673 | KX865787 | 20.4946 | 96.8772 |
| <i>Y. inlenensis</i> Konopleva et al., 2019             | Myanmar: Salween Basin, Inle Lake Channel                  | RMBH: biv 115/1  | KX865919 | n/a      | KX865790 | 20.4705 | 96.8546 |
| <i>Y. inlenensis</i> Konopleva et al., 2019             | Myanmar: Salween Basin, Inle Lake Channel                  | RMBH: biv 115/2  | KX865921 | n/a      | KX865792 | 20.4705 | 96.8546 |
| <i>Y. inlenensis</i> Konopleva et al., 2019             | Myanmar: Salween Basin, Inle Lake Channel                  | RMBH: biv 115/3  | KX865920 | n/a      | KX865791 | 20.4705 | 96.8546 |
| <i>Y. inlenensis</i> Konopleva et al., 2019             | Myanmar: Salween Basin, Mway Stream                        | RMBH: biv 139/7  | KX865922 | KX865676 | KX865793 | 19.7266 | 97.0992 |
| <i>Y. inlenensis</i> Konopleva et al., 2019             | Myanmar: Salween Basin, Mway Stream                        | RMBH: biv 139/15 | KX865923 | KX865677 | KX865794 | 19.7266 | 97.0992 |
| <i>Y. inlenensis</i> Konopleva et al., 2019             | Myanmar: Salween Basin, Mway Stream                        | RMBH: biv 139/18 | KX865924 | KX865678 | KX865795 | 19.7266 | 97.0992 |
| <i>Y. inlenensis</i> Konopleva et al., 2019             | Myanmar: Salween Basin, Nam Pilu River                     | RMBH: biv 140/22 | KX865925 | KX865679 | KX865796 | 19.6746 | 97.1352 |
| <i>Y. inlenensis</i> Konopleva et al., 2019             | Myanmar: Salween Basin, Nam Pilu River                     | RMBH: biv 140/24 | KX865926 | KX865680 | KX865797 | 19.6746 | 97.1352 |
| <i>Y. inlenensis</i> Konopleva et al., 2019             | Myanmar: Salween Basin, Nam Pilu River                     | RMBH: biv 140/25 | KX865927 | KX865681 | KX865798 | 19.6746 | 97.1352 |
| <i>Y. inlenensis</i> Konopleva et al., 2019             | Myanmar: Salween Basin, Mway Stream                        | RMBH: biv 143/2  | KX865917 | KX865674 | KX865788 | 19.7266 | 97.0992 |
| <i>Y. paiensis</i> Konopleva et al., 2019               | Thailand: Salween Basin, Khong River                       | ICH-00638        | MH345970 | MH346011 | MH345991 | 19.4246 | 98.4013 |
| <i>Y. paiensis</i> Konopleva et al., 2019               | Thailand: Salween Basin, Khong River                       | ICH-00639        | MH345971 | MH346012 | MH345992 | 19.4246 | 98.4013 |
| <i>Y. paiensis</i> Konopleva et al., 2019               | Thailand: Salween Basin, Khong River                       | ICH-00640        | MH345972 | n/a      | n/a      | 19.4246 | 98.4013 |
| <i>Y. avaensis</i> Bolotov et al., 2020                 | Myanmar: Ayeyarwady Basin, unnamed stream                  | RMBH: biv 680/1  | MN275070 | n/a      | n/a      | 25.2758 | 97.2722 |
| <i>Y. avaensis</i> Bolotov et al., 2020                 | Myanmar: Ayeyarwady Basin, unnamed stream                  | RMBH: biv 680/3  | MN275071 | MN307259 | MN307200 | 25.2758 | 97.2722 |
| <i>Y. avaensis</i> Bolotov et al., 2020                 | Myanmar: Ayeyarwady Basin, unnamed stream                  | RMBH: biv 680/5  | MN275072 | n/a      | MN307201 | 25.2758 | 97.2722 |
| <i>Y. rectangularis</i> (Tapparone-Canefri, 1889)       | Myanmar: Ayeyarwady Basin, Nanyinhka Chaung River          | RMBH: biv 111/2  | KX865889 | KX865656 | KX865760 | 25.0815 | 96.2874 |
| <i>Y. rectangularis</i> (Tapparone-Canefri, 1889)       | Myanmar: Ayeyarwady Basin, Nanyinhka Chaung River          | RMBH: biv 111/21 | KX865890 | KX865657 | KX865761 | 25.0815 | 96.2874 |
| <i>Y. rectangularis</i> (Tapparone-Canefri, 1889)       | Myanmar: Ayeyarwady Basin, Nanyinhka Chaung River          | RMBH: biv 111/43 | KX865891 | KX865658 | KX865762 | 25.0815 | 96.2874 |
| <i>Y. rectangularis</i> (Tapparone-Canefri, 1889)       | Myanmar: Ayeyarwady Basin, Mali Hka Basin, Pan Khai Stream | RMBH: biv 101/4  | KX865892 | n/a      | n/a      | 27.4493 | 97.3432 |
| <i>Y. rectangularis</i> (Tapparone-Canefri, 1889)       | Myanmar: Ayeyarwady Basin, Mali Hka Basin, Pan Khai Stream | RMBH: biv 101/5  | KX865894 | KX865659 | KX865763 | 27.4493 | 97.3432 |
| <i>Y. rectangularis</i> (Tapparone-Canefri, 1889)       | Myanmar: Ayeyarwady Basin, Mali Hka Basin, Pan Khai Stream | RMBH: biv 101/6  | KX865895 | n/a      | KX865764 | 27.4493 | 97.3432 |

|                                                      |                                                                     |                     |          |          |          |         |         |
|------------------------------------------------------|---------------------------------------------------------------------|---------------------|----------|----------|----------|---------|---------|
| <i>Y. rectangularis</i><br>(Tapparone-Canefri, 1889) | Myanmar:<br>Ayeyarwady Basin,<br>Mali Hka Basin, Nam<br>Balak River | RMBH: biv<br>102/7  | KX865899 | KX865660 | KX865768 | 27.4741 | 97.3493 |
| <i>Y. rectangularis</i><br>(Tapparone-Canefri, 1889) | Myanmar:<br>Ayeyarwady Basin,<br>Mali Hka Basin, Nam<br>Balak River | RMBH: biv<br>102/11 | KX865900 | KX865661 | KX865769 | 27.4741 | 97.3493 |
| <i>Y. rectangularis</i><br>(Tapparone-Canefri, 1889) | Myanmar:<br>Ayeyarwady Basin,<br>Mali Hka Basin, Nam<br>Balak River | RMBH: biv<br>102/14 | KX865901 | KX865662 | KX865770 | 27.4741 | 97.3493 |
| <i>Y. rectangularis</i><br>(Tapparone-Canefri, 1889) | Myanmar:<br>Ayeyarwady Basin,<br>Mali Hka Basin,<br>Mansakun River  | RMBH: biv<br>103/17 | KX865896 | n/a      | KX865765 | 27.4909 | 97.3351 |
| <i>Y. rectangularis</i><br>(Tapparone-Canefri, 1889) | Myanmar:<br>Ayeyarwady Basin,<br>Mali Hka Basin,<br>Mansakun River  | RMBH: biv<br>103/18 | KX865897 | n/a      | KX865766 | 27.4909 | 97.3351 |
| <i>Y. rectangularis</i><br>(Tapparone-Canefri, 1889) | Myanmar:<br>Ayeyarwady Basin,<br>Mali Hka Basin,<br>Mansakun River  | RMBH: biv<br>103/19 | KX865898 | n/a      | KX865767 | 27.4909 | 97.3351 |
| <i>Y. rectangularis</i><br>(Tapparone-Canefri, 1889) | Myanmar:<br>Ayeyarwady Basin,<br>Mali Hka Basin,<br>unnamed stream  | RMBH: biv<br>104/34 | KX865904 | n/a      | KX865773 | 27.5475 | 97.3705 |
| <i>Y. rectangularis</i><br>(Tapparone-Canefri, 1889) | Myanmar:<br>Ayeyarwady Basin,<br>Mali Hka Basin,<br>unnamed stream  | RMBH: biv<br>104/35 | KX865905 | n/a      | KX865774 | 27.5475 | 97.3705 |
| <i>Y. rectangularis</i><br>(Tapparone-Canefri, 1889) | Myanmar:<br>Ayeyarwady Basin,<br>Mali Hka Basin, Nam<br>Shu River   | RMBH: biv<br>105/24 | KX865893 | n/a      | n/a      | 27.5482 | 97.3700 |
| <i>Y. rectangularis</i><br>(Tapparone-Canefri, 1889) | Myanmar:<br>Ayeyarwady Basin,<br>Mali Hka Basin, Nam<br>Shu River   | RMBH: biv<br>105/31 | KX865902 | n/a      | KX865771 | 27.5482 | 97.3700 |
| <i>Y. rectangularis</i><br>(Tapparone-Canefri, 1889) | Myanmar:<br>Ayeyarwady Basin,<br>Mali Hka Basin, Nam<br>Shu River   | RMBH: biv<br>105/32 | KX865903 | n/a      | KX865772 | 27.5482 | 97.3700 |
| <i>Y. rectangularis</i><br>(Tapparone-Canefri, 1889) | Myanmar:<br>Ayeyarwady Basin,<br>Mole Stream                        | RMBH: biv<br>916/1  | OL597635 | ON142664 | OL598387 | 24.4010 | 97.2544 |
| <i>Y. rectangularis</i><br>(Tapparone-Canefri, 1889) | Myanmar:<br>Ayeyarwady Basin,<br>Mole Stream                        | RMBH: biv<br>916/2  | OL597636 | ON142665 | OL598388 | 24.4010 | 97.2544 |
| <i>Y. rectangularis</i><br>(Tapparone-Canefri, 1889) | Myanmar:<br>Ayeyarwady Basin,<br>Mole Stream                        | RMBH: biv<br>916/3  | OL597637 | n/a      | n/a      | 24.4010 | 97.2544 |
| <i>Y. rectangularis</i><br>(Tapparone-Canefri, 1889) | Myanmar:<br>Ayeyarwady Basin,<br>Mole Stream                        | RMBH: biv<br>917/1  | OL597638 | ON142666 | OL598389 | 24.4010 | 97.2544 |
| <i>Y. rectangularis</i><br>(Tapparone-Canefri, 1889) | Myanmar:<br>Ayeyarwady Basin,<br>Indaw River                        | RMBH: biv<br>937/1  | OL597639 | n/a      | n/a      | 25.5274 | 96.7189 |
| <i>Y. rectangularis</i><br>(Tapparone-Canefri, 1889) | Myanmar:<br>Ayeyarwady Basin,<br>Indaw River                        | RMBH: biv<br>937/2  | OL597640 | n/a      | n/a      | 25.5274 | 96.7189 |
| <i>Y. rectangularis</i><br>(Tapparone-Canefri, 1889) | Myanmar:<br>Ayeyarwady Basin,<br>Indaw River                        | RMBH: biv<br>937/3  | OL597641 | n/a      | n/a      | 25.5274 | 96.7189 |
| <i>Y. rectangularis</i><br>(Tapparone-Canefri, 1889) | Myanmar:<br>Ayeyarwady Basin,<br>Mogaung River                      | RMBH: biv<br>961/1  | OL597642 | n/a      | n/a      | 25.3151 | 96.9326 |
| <i>Y. rectangularis</i><br>(Tapparone-Canefri, 1889) | Myanmar:<br>Ayeyarwady Basin,<br>Mogaung River                      | RMBH: biv<br>961/2  | OL597643 | n/a      | n/a      | 25.3151 | 96.9326 |
| <i>Y. rectangularis</i><br>(Tapparone-Canefri, 1889) | Myanmar:<br>Ayeyarwady Basin,<br>Mogaung River                      | RMBH: biv<br>961/3  | OL597644 | n/a      | n/a      | 25.3151 | 96.9326 |
| <i>Y. rectangularis</i><br>(Tapparone-Canefri, 1889) | Myanmar:<br>Ayeyarwady Basin,<br>Mogaung River                      | RMBH: biv<br>964/1  | OL597645 | n/a      | n/a      | 25.3151 | 96.9326 |

|                                                      |                                                      |                    |          |          |          |         |         |
|------------------------------------------------------|------------------------------------------------------|--------------------|----------|----------|----------|---------|---------|
| <i>Y. rectangularis</i><br>(Tapparone-Canefri, 1889) | Myanmar:<br>Ayeyarwady Basin,<br>Mogaung River       | RMBH: biv<br>964/2 | OL597646 | n/a      | n/a      | 25.3151 | 96.9326 |
| <i>Y. rectangularis</i><br>(Tapparone-Canefri, 1889) | Myanmar:<br>Ayeyarwady Basin,<br>Mogaung River       | RMBH: biv<br>964/3 | OL597647 | n/a      | n/a      | 25.3151 | 96.9326 |
| <i>Y. rectangularis</i><br>(Tapparone-Canefri, 1889) | Myanmar:<br>Ayeyarwady Basin,<br>Nantyin Stream      | RMBH: biv<br>974/1 | OL597648 | n/a      | n/a      | 25.0271 | 96.6183 |
| <i>Y. rectangularis</i><br>(Tapparone-Canefri, 1889) | Myanmar:<br>Ayeyarwady Basin,<br>Nantyin Stream      | RMBH: biv<br>974/2 | OL597649 | n/a      | n/a      | 25.0271 | 96.6183 |
| <i>Y. rectangularis</i><br>(Tapparone-Canefri, 1889) | Myanmar:<br>Ayeyarwady Basin,<br>Nantyin Stream      | RMBH: biv<br>974/3 | OL597650 | n/a      | n/a      | 25.0271 | 96.6183 |
| <i>Y. rectangularis</i><br>(Tapparone-Canefri, 1889) | Myanmar:<br>Ayeyarwady Basin,<br>Nantyin Stream      | RMBH: biv<br>976/1 | OL597651 | n/a      | OL598390 | 25.0271 | 96.6183 |
| <i>Y. rectangularis</i><br>(Tapparone-Canefri, 1889) | Myanmar:<br>Ayeyarwady Basin,<br>Nantyin Stream      | RMBH: biv<br>976/2 | OL597652 | n/a      | OL598391 | 25.0271 | 96.6183 |
| <i>Y. rectangularis</i><br>(Tapparone-Canefri, 1889) | Myanmar:<br>Ayeyarwady Basin,<br>Nantyin Stream      | RMBH: biv<br>976/3 | OL597653 | n/a      | OL598392 | 25.0271 | 96.6183 |
| <i>Y. zayleymanensis</i><br>(Preston, 1912)          | Myanmar:<br>Ayeyarwady River<br>near Mandalay        | RMBH: biv<br>448/1 | OL597654 | n/a      | OL598393 | 21.8893 | 95.9978 |
| <i>Y. zayleymanensis</i><br>(Preston, 1912)          | Myanmar:<br>Ayeyarwady River<br>near Mandalay        | RMBH: biv<br>448/2 | OL597655 | n/a      | n/a      | 21.8893 | 95.9978 |
| <i>Y. zayleymanensis</i><br>(Preston, 1912)          | Myanmar:<br>Ayeyarwady Basin,<br>Bani River          | RMBH: biv<br>665/1 | MN275073 | MN307260 | MN307202 | 19.3247 | 94.9839 |
| <i>Y. zayleymanensis</i><br>(Preston, 1912)          | Myanmar:<br>Ayeyarwady Basin,<br>Bani River          | RMBH: biv<br>665/3 | OL597656 | n/a      | n/a      | 19.3247 | 94.9839 |
| <i>Y. zayleymanensis</i><br>(Preston, 1912)          | Myanmar:<br>Ayeyarwady Basin,<br>Bani River          | RMBH: biv<br>666/6 | OL597657 | n/a      | n/a      | 19.3247 | 94.9839 |
| <i>Y. zayleymanensis</i><br>(Preston, 1912)          | Myanmar:<br>Ayeyarwady Basin,<br>"small stream"      | RMBH: biv<br>679/1 | MN275074 | MN307261 | MN307203 | 25.2758 | 97.2722 |
| <i>Y. zayleymanensis</i><br>(Preston, 1912)          | Myanmar:<br>Ayeyarwady Basin,<br>"small stream"      | RMBH: biv<br>679/2 | MN275075 | MN307262 | MN307204 | 25.2758 | 97.2722 |
| <i>Y. zayleymanensis</i><br>(Preston, 1912)          | Myanmar:<br>Ayeyarwady Basin,<br>"small stream"      | RMBH: biv<br>679/3 | OL597658 | n/a      | n/a      | 25.2758 | 97.2722 |
| <i>Y. zayleymanensis</i><br>(Preston, 1912)          | Myanmar:<br>Ayeyarwady Basin,<br>Lamon Chaung Stream | RMBH: biv<br>899/1 | OL597659 | n/a      | n/a      | 26.3463 | 96.6685 |
| <i>Y. zayleymanensis</i><br>(Preston, 1912)          | Myanmar:<br>Ayeyarwady Basin,<br>Lamon Chaung Stream | RMBH: biv<br>899/2 | OL597660 | n/a      | n/a      | 26.3463 | 96.6685 |
| <i>Y. zayleymanensis</i><br>(Preston, 1912)          | Myanmar:<br>Ayeyarwady Basin,<br>Mole Stream         | RMBH: biv<br>917/2 | OL597661 | n/a      | n/a      | 24.4010 | 97.2544 |
| <i>Y. zayleymanensis</i><br>(Preston, 1912)          | Myanmar:<br>Ayeyarwady Basin,<br>Mole Stream         | RMBH: biv<br>917/3 | OL597662 | n/a      | n/a      | 24.4010 | 97.2544 |
| <i>Y. zayleymanensis</i><br>(Preston, 1912)          | Myanmar:<br>Ayeyarwady Basin,<br>Mole Stream         | RMBH: biv<br>918/1 | OL597663 | n/a      | n/a      | 24.4010 | 97.2544 |
| <i>Y. zayleymanensis</i><br>(Preston, 1912)          | Myanmar:<br>Ayeyarwady Basin,<br>Mole Stream         | RMBH: biv<br>918/2 | OL597664 | n/a      | n/a      | 24.4010 | 97.2544 |
| <i>Y. zayleymanensis</i><br>(Preston, 1912)          | Myanmar:<br>Ayeyarwady Basin,<br>Mole Stream         | RMBH: biv<br>918/3 | OL597665 | n/a      | n/a      | 24.4010 | 97.2544 |
| <i>Y. zayleymanensis</i><br>(Preston, 1912)          | Myanmar:<br>Ayeyarwady Basin,<br>Mogaung River       | RMBH: biv<br>963/1 | OL597666 | n/a      | n/a      | 25.3151 | 96.9326 |
| <i>Y. zayleymanensis</i><br>(Preston, 1912)          | Myanmar:<br>Ayeyarwady Basin,<br>Mogaung River       | RMBH: biv<br>963/2 | OL597667 | n/a      | n/a      | 25.3151 | 96.9326 |

|                                                                                         |                                                     |                 |          |          |          |         |         |
|-----------------------------------------------------------------------------------------|-----------------------------------------------------|-----------------|----------|----------|----------|---------|---------|
| <i>Y. zayleymanensis</i> (Preston, 1912)                                                | Myanmar: Ayeyarwady Basin, Mogaung River            | RMBH: biv 963/3 | OL597668 | n/a      | n/a      | 25.3151 | 96.9326 |
| <i>Y. elongatula</i> Bolotov et al., 2019                                               | Myanmar: Ayeyarwady Basin, Chindwin River           | RMBH: biv 346/1 | MK372406 | MK372454 | MK372484 | 23.1918 | 94.3217 |
| <i>Y. elongatula</i> Bolotov et al., 2019                                               | Myanmar: Ayeyarwady Basin, Chindwin River           | RMBH: biv 346/2 | MK372407 | MK372455 | MK372485 | 23.1918 | 94.3217 |
| <i>Y. elongatula</i> Bolotov et al., 2019                                               | Myanmar: Ayeyarwady Basin, Chindwin River           | RMBH: biv 346/3 | MK372408 | MK372456 | MK372486 | 23.1918 | 94.3217 |
| <i>Y. elongatula</i> Bolotov et al., 2019                                               | Myanmar: Ayeyarwady Basin, Myit Tha (Manipur) River | RMBH: biv 344/1 | MK372402 | n/a      | n/a      | 23.2006 | 94.2214 |
| <i>Y. elongatula</i> Bolotov et al., 2019                                               | Myanmar: Ayeyarwady Basin, Myit Tha (Manipur) River | RMBH: biv 344/3 | MK372403 | n/a      | n/a      | 23.2006 | 94.2214 |
| <i>Y. elongatula</i> Bolotov et al., 2019                                               | Myanmar: Ayeyarwady Basin, Myit Tha (Manipur) River | RMBH: biv 341/2 | MK372400 | MK372451 | MK372480 | 23.2448 | 94.1662 |
| <i>Y. elongatula</i> Bolotov et al., 2019                                               | Myanmar: Ayeyarwady Basin, Myit Tha (Manipur) River | RMBH: biv 341/3 | MK372401 | n/a      | MK372481 | 23.2448 | 94.1662 |
| <i>Y. elongatula</i> Bolotov et al., 2019                                               | Myanmar: Ayeyarwady Basin, Myit Tha (Manipur) River | RMBH: biv 339/1 | MK372397 | n/a      | MK372478 | 23.2285 | 94.1434 |
| <i>Y. elongatula</i> Bolotov et al., 2019                                               | Myanmar: Ayeyarwady Basin, Myit Tha (Manipur) River | RMBH: biv 339/2 | MK372398 | n/a      | MK372479 | 23.2285 | 94.1434 |
| <i>Y. elongatula</i> Bolotov et al., 2019                                               | Myanmar: Ayeyarwady Basin, Myit Tha (Manipur) River | RMBH: biv 339/3 | MK372399 | n/a      | n/a      | 23.2285 | 94.1434 |
| <i>Y. baniensis</i> (Bolotov et al., 2020)                                              | Myanmar: Ayeyarwady Basin, Bani River               | RMBH: biv 666/1 | MN275076 | MN307263 | MN307205 | 19.3247 | 94.9839 |
| <i>Y. baniensis</i> (Bolotov et al., 2020)                                              | Myanmar: Ayeyarwady Basin, Bani River               | RMBH: biv 666/2 | MN275077 | MN307264 | MN307206 | 19.3247 | 94.9839 |
| <i>Y. baniensis</i> (Bolotov et al., 2020)                                              | Myanmar: Ayeyarwady Basin, Bani River               | RMBH: biv 666/3 | MN275078 | MN307265 | MN307207 | 19.3247 | 94.9839 |
| <i>Y. dalliana</i> (Frierson, 1913)                                                     | Myanmar: Ayeyarwady Basin, Lashio River             | RMBH: biv 982/1 | OL741730 | OL763823 | OL763821 | 22.9965 | 97.8535 |
| <i>Y. dalliana</i> (Frierson, 1913)                                                     | Myanmar: Ayeyarwady Basin, Lashio River             | RMBH: biv 982/2 | OL741731 | OL763824 | OL763822 | 22.9965 | 97.8535 |
| <i>Y. dalliana</i> (Frierson, 1913)                                                     | Myanmar: Ayeyarwady Basin, Lashio River             | RMBH: biv 982/3 | OL741732 | n/a      | n/a      | 22.9965 | 97.8535 |
| <b>PARREYSIINAE Henderson, 1935</b>                                                     |                                                     |                 |          |          |          |         |         |
| <b>Indochinellini Bolotov et al., 2018</b>                                              |                                                     |                 |          |          |          |         |         |
| <b>Indochinella Bolotov, Pfeiffer, Vikhrev, &amp; Konopleva in Bolotov et al., 2018</b> |                                                     |                 |          |          |          |         |         |
| <i>Indochinella pugio pugio</i> (Benson, 1862)                                          | Myanmar: Ayeyarwady Basin, Lake Nant Phar           | RMBH: biv 258/1 | MF352261 | MF352325 | MF352386 | 24.2972 | 97.2610 |
| <i>I. pugio pugio</i> (Benson, 1862)                                                    | Myanmar: Ayeyarwady Basin, Lake Nant Phar           | RMBH: biv 258/2 | MF352262 | MF352326 | MF352389 | 24.2972 | 97.2610 |
| <i>I. pugio pugio</i> (Benson, 1862)                                                    | Myanmar: Ayeyarwady Basin, Lake Myaung              | RMBH: biv 268/1 | MF352285 | n/a      | n/a      | 24.2387 | 97.1658 |
| <i>I. pugio pugio</i> (Benson, 1862)                                                    | Myanmar: Ayeyarwady Basin, Lake Myaung              | RMBH: biv 268/2 | MF352286 | MF352346 | MF352403 | 24.2387 | 97.1658 |
| <i>I. pugio pugio</i> (Benson, 1862)                                                    | Myanmar: Ayeyarwady Basin, Lake Myaung              | RMBH: biv 268/4 | MF352287 | MF352347 | MF352404 | 24.2387 | 97.1658 |

|                                                  |                                                         |                  |          |          |          |         |         |
|--------------------------------------------------|---------------------------------------------------------|------------------|----------|----------|----------|---------|---------|
| <i>I. pugio pugio</i> (Benson, 1862)             | Myanmar: Ayeyarwady Basin, Chindwin River, Pauk In Lake | UA 20739         | JN243899 | KP795046 | JN243879 | n/a     | n/a     |
| <i>I. pugio viridissima</i> Bolotov et al., 2019 | Myanmar: Sittaung Basin, Myit Kyi Pauk Stream           | RMBH: biv 251/1  | MF352242 | MF352312 | MF352370 | 18.9613 | 96.4455 |
| <i>I. pugio viridissima</i> Bolotov et al., 2019 | Myanmar: Sittaung Basin, Myit Kyi Pauk Stream           | RMBH: biv 251/2  | MF352243 | MF352313 | MF352371 | 18.9613 | 96.4455 |
| <i>I. pugio viridissima</i> Bolotov et al., 2019 | Myanmar: Sittaung Basin, Myit Kyi Pauk Stream           | RMBH: biv 251/3  | MF352244 | MF352314 | MF352372 | 18.9613 | 96.4455 |
| <i>I. pugio viridissima</i> Bolotov et al., 2019 | Myanmar: Bilin River                                    | RMBH: biv 371/1  | MK372426 | MK372468 | MK372500 | 17.3306 | 97.2418 |
| <i>I. pugio viridissima</i> Bolotov et al., 2019 | Myanmar: Bilin River                                    | RMBH: biv 371/2  | MK372427 | MK372469 | MK372501 | 17.3306 | 97.2418 |
| <i>I. pugio viridissima</i> Bolotov et al., 2019 | Myanmar: Bilin River                                    | RMBH: biv 371/3  | MK372428 | n/a      | n/a      | 17.3306 | 97.2418 |
| <i>I. pugio viridissima</i> Bolotov et al., 2019 | Myanmar: Bilin River                                    | RMBH: biv 375/1  | MK372429 | n/a      | n/a      | 17.2757 | 97.1274 |
| <i>I. pugio viridissima</i> Bolotov et al., 2019 | Myanmar: Bilin River                                    | RMBH: biv 375/2  | MK372430 | n/a      | n/a      | 17.2757 | 97.1274 |
| <i>I. pugio viridissima</i> Bolotov et al., 2019 | Myanmar: Bilin River                                    | RMBH: biv 375/3  | MK372431 | n/a      | n/a      | 17.2757 | 97.1274 |
| <i>I. pugio viridissima</i> Bolotov et al., 2019 | Myanmar: Bilin River                                    | RMBH: biv 377/2  | MK372432 | n/a      | n/a      | 17.5968 | 96.5950 |
| <i>I. pugio viridissima</i> Bolotov et al., 2019 | Myanmar: Bilin River                                    | RMBH: biv 377/3  | MK372433 | n/a      | n/a      | 17.5968 | 96.5950 |
| <i>I. pugio viridissima</i> Bolotov et al., 2019 | Myanmar: Bago River                                     | RMBH: biv 381/3  | MK372434 | n/a      | n/a      | 17.5334 | 96.3315 |
| <i>I. pugio viridissima</i> Bolotov et al., 2019 | Myanmar: Bago River                                     | RMBH: biv 381/4  | MK372435 | n/a      | n/a      | 17.5334 | 96.3315 |
| <i>I. pugio daweiensis</i> Bolotov et al., 2019  | Myanmar: Dawei River                                    | RMBH: biv 147/3  | KX865852 | KX865623 | KX865724 | 14.5013 | 98.1558 |
| <i>I. pugio daweiensis</i> Bolotov et al., 2019  | Myanmar: Dawei River                                    | RMBH: biv 147/10 | KX865853 | KX865624 | KX865725 | 14.5013 | 98.1558 |
| <i>I. pugio daweiensis</i> Bolotov et al., 2019  | Myanmar: Dawei River                                    | RMBH: biv 147/18 | KX865854 | KX865625 | KX865726 | 14.5013 | 98.1558 |
| <i>I. pugio daweiensis</i> Bolotov et al., 2019  | Myanmar: Dawei River                                    | RMBH: biv 147/30 | MK372395 | n/a      | n/a      | 14.5013 | 98.1558 |
| <i>I. pugio daweiensis</i> Bolotov et al., 2019  | Myanmar: Dawei River                                    | RMBH: biv 148/4  | KX865855 | KX865626 | KX865727 | 14.5013 | 98.1558 |
| <i>I. pugio daweiensis</i> Bolotov et al., 2019  | Myanmar: Dawei River                                    | RMBH: biv 148/7  | KX865856 | KX865627 | KX865728 | 14.5013 | 98.1558 |
| <i>I. pugio daweiensis</i> Bolotov et al., 2019  | Myanmar: Dawei River                                    | RMBH: biv 148/15 | KX865857 | KX865628 | KX865729 | 14.5013 | 98.1558 |
| <i>I. pugio paradoxa</i> Bolotov et al., 2019    | Myanmar: Haungthayaw River upStream of Kawkareik town   | RMBH: biv 361/1  | MK372420 | MK372465 | MK372496 | 16.4714 | 98.2183 |
| <i>I. pugio paradoxa</i> Bolotov et al., 2019    | Myanmar: Haungthayaw River upStream of Kawkareik town   | RMBH: biv 361/2  | MK372421 | MK372466 | MK372497 | 16.4714 | 98.2183 |
| <i>I. pugio paradoxa</i> Bolotov et al., 2019    | Myanmar: Haungthayaw River upStream of Kawkareik town   | RMBH: biv 361/3  | MK372422 | MK372467 | MK372498 | 16.4714 | 98.2183 |
| <b>Indonaia Prashad, 1918</b>                    |                                                         |                  |          |          |          |         |         |
| <i>Indonaia caerulea</i> (Lea, 1831)             | India: Krishna Basin, fish pond                         | RRc1             | KT869141 | n/a      | n/a      | n/a     | n/a     |
| <i>I. aff. khadakvaslaensis</i> (Ray, 1966)      | India                                                   | SBM7             | KF690124 | n/a      | n/a      | n/a     | n/a     |
| <i>I. aff. khadakvaslaensis</i> (Ray, 1966)      | India                                                   | SBM19            | KF690122 | n/a      | n/a      | n/a     | n/a     |
| <i>I. aff. khadakvaslaensis</i> (Ray, 1966)      | India                                                   | SBM23            | KF690123 | n/a      | n/a      | n/a     | n/a     |
| <i>I. lima</i> (Simpson, 1900)                   | India: Krishna River, Nagarjuna Sagar                   | RR11             | KP268827 | n/a      | n/a      | n/a     | n/a     |
| <i>I. andersoniana</i> (Nevill, 1877)            | Myanmar: Ayeyarwady Basin, Lake Indawgyi                | RMBH: biv 108/1  | KX865835 | KX865606 | KX865709 | 25.1099 | 96.2925 |
| <i>I. andersoniana</i> (Nevill, 1877)            | Myanmar: Ayeyarwady Basin, Lake Indawgyi                | RMBH: biv 108/2  | KX865836 | KX865607 | n/a      | 25.1099 | 96.2925 |

|                                       |                                                  |                  |          |          |          |         |         |
|---------------------------------------|--------------------------------------------------|------------------|----------|----------|----------|---------|---------|
| <i>I. andersoniana</i> (Nevill, 1877) | Myanmar: Ayeyarwady Basin, Lake Indawgyi         | RMBH: biv 108/3  | KX865837 | KX865608 | n/a      | 25.1099 | 96.2925 |
| <i>I. andersoniana</i> (Nevill, 1877) | Myanmar: Ayeyarwady Basin, Lake Nant Phar        | RMBH: biv 259/1  | MF352263 | MF352327 | MF352387 | 24.2972 | 97.2610 |
| <i>I. andersoniana</i> (Nevill, 1877) | Myanmar: Ayeyarwady Basin, Lake Nant Phar        | RMBH: biv 259/3  | MF352264 | MF352328 | n/a      | 24.2972 | 97.2610 |
| <i>I. andersoniana</i> (Nevill, 1877) | Myanmar: Ayeyarwady Basin, Lake Nant Phar        | RMBH: biv 259/4  | MF352265 | MF352329 | MF352388 | 24.2972 | 97.2610 |
| <i>I. andersoniana</i> (Nevill, 1877) | Myanmar: Ayeyarwady Basin, Lake Nant Phar        | RMBH: biv 263/1  | MF352275 | MF352337 | MF352397 | 24.2196 | 97.2224 |
| <i>I. andersoniana</i> (Nevill, 1877) | Myanmar: Ayeyarwady Basin, Nant Sa Yi River      | RMBH: biv 263/2  | MF352276 | MF352338 | n/a      | 24.2196 | 97.2224 |
| <i>I. andersoniana</i> (Nevill, 1877) | Myanmar: Ayeyarwady Basin, Lake Myaung           | RMBH: biv 267/1  | MF352283 | MF352341 | n/a      | 24.2387 | 97.1658 |
| <i>I. andersoniana</i> (Nevill, 1877) | Myanmar: Ayeyarwady Basin, Lake Myaung           | RMBH: biv 267/3  | MF352284 | MF352342 | n/a      | 24.2387 | 97.1658 |
| <i>I. andersoniana</i> (Nevill, 1877) | Myanmar: Salween Basin, Mizan Stream             | RMBH: biv 368/1  | OL597669 | OL598373 | OL598394 | 16.9770 | 97.6330 |
| <i>I. andersoniana</i> (Nevill, 1877) | Myanmar: Salween Basin, Mizan Stream             | RMBH: biv 368/2  | OL597670 | n/a      | n/a      | 16.9770 | 97.6330 |
| <i>I. andersoniana</i> (Nevill, 1877) | Myanmar: Salween Basin, Mizan Stream             | RMBH: biv 368/3  | OL597671 | n/a      | n/a      | 16.9770 | 97.6330 |
| <i>I. andersoniana</i> (Nevill, 1877) | Myanmar: Bago River                              | RMBH: biv 383/1  | OL597672 | n/a      | n/a      | 17.5334 | 96.3315 |
| <i>I. andersoniana</i> (Nevill, 1877) | Myanmar: Bago River                              | RMBH: biv 383/2  | OL597673 | n/a      | n/a      | 17.5334 | 96.3315 |
| <i>I. andersoniana</i> (Nevill, 1877) | Myanmar: Bago River                              | RMBH: biv 383/3  | OL597674 | n/a      | n/a      | 17.5334 | 96.3315 |
| <i>I. andersoniana</i> (Nevill, 1877) | Myanmar: Bago River                              | RMBH: biv 389/1  | OL597675 | n/a      | n/a      | 17.6795 | 96.2347 |
| <i>I. andersoniana</i> (Nevill, 1877) | Myanmar: Bago River                              | RMBH: biv 389/2  | OL597676 | n/a      | n/a      | 17.6795 | 96.2347 |
| <i>I. andersoniana</i> (Nevill, 1877) | Myanmar: Bago River                              | RMBH: biv 389/3  | OL597677 | n/a      | n/a      | 17.6795 | 96.2347 |
| <i>I. andersoniana</i> (Nevill, 1877) | Myanmar: Salween Basin, Balu River near Loikaw   | RMBH: biv 405A/1 | OL597678 | n/a      | n/a      | 19.6682 | 97.1848 |
| <i>I. andersoniana</i> (Nevill, 1877) | Myanmar: Salween Basin, Balu River near Loikaw   | RMBH: biv 405A/2 | OL597679 | n/a      | n/a      | 19.6682 | 97.1848 |
| <i>I. andersoniana</i> (Nevill, 1877) | Myanmar: Salween Basin, Balu River near Loikaw   | RMBH: biv 405A/3 | OL597680 | n/a      | n/a      | 19.6682 | 97.1848 |
| <i>I. andersoniana</i> (Nevill, 1877) | Myanmar: Sittaung Basin, Hnit Saung Pyang Stream | RMBH: biv 407/1  | OL597681 | n/a      | n/a      | 19.5140 | 96.2621 |
| <i>I. andersoniana</i> (Nevill, 1877) | Myanmar: Sittaung Basin, Hnit Saung Pyang Stream | RMBH: biv 407/2  | OL597682 | n/a      | n/a      | 19.5140 | 96.2621 |
| <i>I. andersoniana</i> (Nevill, 1877) | Myanmar: Sittaung Basin, Hnit Saung Pyang Stream | RMBH: biv 407/3  | OL597683 | n/a      | n/a      | 19.5140 | 96.2621 |
| <i>I. andersoniana</i> (Nevill, 1877) | Myanmar: Salween Basin, Balu River near Loikaw   | RMBH: biv 407A/1 | OL597684 | n/a      | n/a      | 19.6682 | 97.1848 |
| <i>I. andersoniana</i> (Nevill, 1877) | Myanmar: Salween Basin, Balu River near Loikaw   | RMBH: biv 407A/2 | OL597685 | n/a      | n/a      | 19.6682 | 97.1848 |
| <i>I. andersoniana</i> (Nevill, 1877) | Myanmar: Sittaung Basin, Sin Thay Stream         | RMBH: biv 412/1  | OL597686 | n/a      | n/a      | 20.1533 | 96.1267 |
| <i>I. andersoniana</i> (Nevill, 1877) | Myanmar: Sittaung Basin, Sin Thay Stream         | RMBH: biv 412/2  | OL597687 | n/a      | n/a      | 20.1533 | 96.1267 |
| <i>I. andersoniana</i> (Nevill, 1877) | Myanmar: Sittaung Basin, Sin Thay Stream         | RMBH: biv 412/3  | OL597688 | n/a      | n/a      | 20.1533 | 96.1267 |

|                                                             |                                                                   |                  |          |          |          |         |         |
|-------------------------------------------------------------|-------------------------------------------------------------------|------------------|----------|----------|----------|---------|---------|
| <i>I. andersoniana</i> (Nevill, 1877)                       | Myanmar: Ayeyarwady Basin, Mone Ding Dam outlet                   | RMBH: biv 414/1  | OL597689 | n/a      | n/a      | 20.8099 | 95.7242 |
| <i>I. andersoniana</i> (Nevill, 1877)                       | Myanmar: Ayeyarwady Basin, Mone Ding Dam outlet                   | RMBH: biv 414/2  | OL597690 | n/a      | n/a      | 20.8099 | 95.7242 |
| <i>I. andersoniana</i> (Nevill, 1877)                       | Myanmar: Ayeyarwady Basin, Mone Ding Dam outlet                   | RMBH: biv 414/3  | OL597691 | n/a      | n/a      | 20.8099 | 95.7242 |
| <i>I. andersoniana</i> (Nevill, 1877)                       | Myanmar: Ayeyarwady Basin, ox-bow lake near Ta Naung Taig village | RMBH: biv 429/1  | OL597692 | n/a      | n/a      | 21.4064 | 95.3399 |
| <i>I. andersoniana</i> (Nevill, 1877)                       | Myanmar: Ayeyarwady Basin, ox-bow lake near Ta Naung Taig village | RMBH: biv 429/2  | OL597693 | n/a      | n/a      | 21.4064 | 95.3399 |
| <i>I. andersoniana</i> (Nevill, 1877)                       | Myanmar: Ayeyarwady Basin, ox-bow lake near Ta Naung Taig village | RMBH: biv 429/3  | OL597694 | n/a      | n/a      | 21.4064 | 95.3399 |
| <i>I. andersoniana</i> (Nevill, 1877)                       | Myanmar: Ayeyarwady River near Mandalay                           | RMBH: biv 434    | OL597695 | n/a      | n/a      | 21.9574 | 96.0510 |
| <i>I. andersoniana</i> (Nevill, 1877)                       | Myanmar: Ayeyarwady River near Mandalay                           | RMBH: biv 450/1  | OL597696 | n/a      | n/a      | 21.8893 | 95.9978 |
| <i>I. andersoniana</i> (Nevill, 1877)                       | Myanmar: Ayeyarwady River near Mandalay                           | RMBH: biv 450/2  | OL597697 | n/a      | n/a      | 21.8893 | 95.9978 |
| <i>I. andersoniana</i> (Nevill, 1877)                       | Myanmar: Ayeyarwady Basin, Indaw River near Sell Ywar village     | RMBH: biv 615/1  | OL597698 | n/a      | n/a      | 24.2123 | 96.0819 |
| <i>I. andersoniana</i> (Nevill, 1877)                       | Myanmar: Ayeyarwady Basin, Indaw River near Sell Ywar village     | RMBH: biv 615/2  | OL597699 | n/a      | n/a      | 24.2123 | 96.0819 |
| <i>I. andersoniana</i> (Nevill, 1877)                       | Myanmar: Bago River                                               | RMBH: biv 1005/1 | OL597700 | ON142667 | n/a      | 18.0791 | 96.0449 |
| <i>I. andersoniana</i> (Nevill, 1877)                       | Myanmar: Bago River                                               | RMBH: biv 1005/2 | OL597701 | ON142668 | n/a      | 18.0791 | 96.0449 |
| <i>I. andersoniana</i> (Nevill, 1877)                       | Myanmar: Bago River                                               | RMBH: biv 1005/3 | OL597702 | ON142669 | n/a      | 18.0791 | 96.0449 |
| <i>I. subclathrata</i> (Martens, 1899)                      | Myanmar: Ayeyarwady Basin, Myit Tha (Manipur) River               | RMBH: biv 338/1  | MH700479 | n/a      | n/a      | 23.2285 | 94.1434 |
| <i>I. subclathrata</i> (Martens, 1899)                      | Myanmar: Ayeyarwady Basin, Myit Tha (Manipur) River               | RMBH: biv 338/2  | OL597703 | n/a      | n/a      | 23.2285 | 94.1434 |
| <i>I. subclathrata</i> (Martens, 1899)                      | Myanmar: Ayeyarwady Basin, Myit Tha (Manipur) River               | RMBH: biv 338/3  | OL597704 | n/a      | n/a      | 23.2285 | 94.1434 |
| <i>I. subclathrata</i> (Martens, 1899)                      | Myanmar: Ayeyarwady Basin, Chindwin River                         | RMBH: biv 347/1  | MH700480 | MN307266 | MH697870 | 23.1918 | 94.3217 |
| <i>I. subclathrata</i> (Martens, 1899)                      | Myanmar: Ayeyarwady Basin, Chindwin River                         | RMBH: biv 347/2  | MN275079 | n/a      | MN307208 | 23.1918 | 94.3217 |
| <i>I. subclathrata</i> (Martens, 1899)                      | Myanmar: Bani River                                               | RMBH: biv 667/1  | MN275080 | n/a      | n/a      | 19.3247 | 94.9839 |
| <i>I. subclathrata</i> (Martens, 1899)                      | Myanmar: Bani River                                               | RMBH: biv 667/2  | OL597705 | n/a      | n/a      | 19.3247 | 94.9839 |
| <b><i>Radiatula</i> Simpson, 1900</b>                       |                                                                   |                  |          |          |          |         |         |
| <i>Radiatula mouhoti</i> Vikhrev, Bolotov & Konopleva, 2017 | Myanmar: Sittaung River near Taungoo                              | RMBH: biv 248/1  | MF352234 | MF352305 | MF352363 | 18.9840 | 96.4361 |
| <i>R. mouhoti</i> Vikhrev, Bolotov & Konopleva, 2017        | Myanmar: Sittaung River near Taungoo                              | RMBH: biv 248/3  | MF352235 | n/a      | n/a      | 18.9840 | 96.4361 |



|                                                         |                                                                 |                  |          |          |          |         |         |
|---------------------------------------------------------|-----------------------------------------------------------------|------------------|----------|----------|----------|---------|---------|
| <i>R. mouhoti</i> Vikhrev, Bolotov & Konopleva, 2017    | Myanmar: Sittaung River near Taungoo                            | RMBH: biv 248/4  | MF352236 | MF352306 | MF352364 | 18.9840 | 96.4361 |
| <i>R. mouhoti</i> Vikhrev, Bolotov & Konopleva, 2017    | Myanmar: Sittaung River near Taungoo                            | RMBH: biv 253/1  | MF352248 | MF352317 | MF352375 | 18.9840 | 96.4361 |
| <i>R. mouhoti</i> Vikhrev, Bolotov & Konopleva, 2017    | Myanmar: Sittaung River near Taungoo                            | RMBH: biv 253/6  | MF352249 | MF352318 | MF352376 | 18.9840 | 96.4361 |
| <i>R. mouhoti</i> Vikhrev, Bolotov & Konopleva, 2017    | Myanmar: Sittaung River near Taungoo                            | RMBH: biv 256    | MF352257 | MF352321 | MF352382 | 18.9840 | 96.4361 |
| <i>R. mouhoti</i> Vikhrev, Bolotov & Konopleva, 2017    | Myanmar: Sittaung River near Kanna village                      | RMBH: biv 409/2  | OL597706 | n/a      | n/a      | 19.4857 | 96.2750 |
| <i>R. mouhoti</i> Vikhrev, Bolotov & Konopleva, 2017    | Myanmar: Sittaung River near Kanna village                      | RMBH: biv 409/3  | OL597707 | n/a      | n/a      | 19.4857 | 96.2750 |
| <i>R. mouhoti</i> Vikhrev, Bolotov & Konopleva, 2017    | Myanmar: Sittaung River near Swanka Doe Seik village            | RMBH: biv 410/1  | OL597708 | n/a      | n/a      | 19.2830 | 96.3107 |
| <i>R. mouhoti</i> Vikhrev, Bolotov & Konopleva, 2017    | Myanmar: Sittaung River near Swanka Doe Seik village            | RMBH: biv 410/2  | OL597709 | n/a      | n/a      | 19.2830 | 96.3107 |
| <i>R. mouhoti</i> Vikhrev, Bolotov & Konopleva, 2017    | Myanmar: Sittaung River near Swanka Doe Seik village            | RMBH: biv 410/3  | OL597710 | n/a      | n/a      | 19.2830 | 96.3107 |
| <i>R. mouhoti</i> Vikhrev, Bolotov & Konopleva, 2017    | Myanmar: Sittaung Basin, Thaing Stream                          | RMBH: biv 411/1  | OL597711 | n/a      | n/a      | 19.2187 | 96.2229 |
| <i>R. mouhoti</i> Vikhrev, Bolotov & Konopleva, 2017    | Myanmar: Sittaung Basin, Thaing Stream                          | RMBH: biv 411/2  | OL597712 | n/a      | n/a      | 19.2187 | 96.2229 |
| <i>R. mouhoti haungthayawensis</i> Bolotov et al., 2019 | Myanmar: Haungthayaw River upstream of Kawkareik town           | RMBH: biv 360/1  | MK372417 | MK372463 | MK372493 | 16.4714 | 98.2183 |
| <i>R. mouhoti haungthayawensis</i> Bolotov et al., 2019 | Myanmar: Haungthayaw River upstream of Kawkareik town           | RMBH: biv 360/2  | MK372418 | MK372464 | MK372494 | 16.4714 | 98.2183 |
| <i>R. mouhoti haungthayawensis</i> Bolotov et al., 2019 | Myanmar: Haungthayaw River upstream of Kawkareik town           | RMBH: biv 360/3  | MK372419 | n/a      | MK372495 | 16.4714 | 98.2183 |
| <i>R. mouhoti haungthayawensis</i> Bolotov et al., 2019 | Myanmar: Haungthayaw Basin, Miton Stream                        | RMBH: biv 1023/1 | OL597713 | n/a      | n/a      | 16.0019 | 98.4064 |
| <i>R. mouhoti haungthayawensis</i> Bolotov et al., 2019 | Myanmar: Haungthayaw Basin, Miton Stream                        | RMBH: biv 1023/2 | OL597714 | OL598374 | n/a      | 16.0019 | 98.4064 |
| <i>R. mouhoti haungthayawensis</i> Bolotov et al., 2019 | Myanmar: Haungthayaw Basin, Miton Stream                        | RMBH: biv 1023/3 | OL597715 | n/a      | n/a      | 16.0019 | 98.4064 |
| <i>R. chaudhurii</i> (Preston, 1912)                    | Myanmar: Ayeyarwady Basin, Tar Pein River                       | RMBH: biv 260/5  | MF352266 | MF352330 | MF352390 | 24.3049 | 97.2514 |
| <i>R. chaudhurii</i> (Preston, 1912)                    | Myanmar: Ayeyarwady Basin, Tar Pein River                       | RMBH: biv 260/9  | MF352267 | MF352331 | MF352391 | 24.3049 | 97.2514 |
| <i>R. chaudhurii</i> (Preston, 1912)                    | Myanmar: Ayeyarwady Basin, Tar Pein River                       | RMBH: biv 260/10 | MF352268 | MF352332 | MF352392 | 24.3049 | 97.2514 |
| <i>R. chaudhurii</i> (Preston, 1912)                    | Myanmar: Ayeyarwady Basin, midstream near Thin Baw Kone village | RMBH: biv 421/2  | MK372439 | MK372471 | MK372503 | 21.3145 | 95.0589 |
| <i>R. chaudhurii</i> (Preston, 1912)                    | Myanmar: Ayeyarwady Basin, midstream near Thin Baw Kone village | RMBH: biv 421/3  | MK372440 | MK372472 | MK372504 | 21.3145 | 95.0589 |
| <i>R. chaudhurii</i> (Preston, 1912)                    | Myanmar: Ayeyarwady Basin, midstream near Thin Baw Kone village | RMBH: biv 427/1  | MK372444 | n/a      | n/a      | 21.2566 | 94.9848 |

|                                      |                                                                 |                 |          |          |          |         |         |
|--------------------------------------|-----------------------------------------------------------------|-----------------|----------|----------|----------|---------|---------|
| <i>R. chaudhurii</i> (Preston, 1912) | Myanmar: Ayeyarwady Basin, midstream near Thin Baw Kone village | RMBH: biv 427/2 | MK372445 | n/a      | n/a      | 21.2566 | 94.9848 |
| <i>R. chaudhurii</i> (Preston, 1912) | Myanmar: Ayeyarwady Basin, Lake Indaw                           | RMBH: biv 604/1 | OL597716 | n/a      | n/a      | 24.2665 | 96.1228 |
| <i>R. chaudhurii</i> (Preston, 1912) | Myanmar: Ayeyarwady Basin, Lake Indaw                           | RMBH: biv 604/2 | OL597717 | n/a      | n/a      | 24.2665 | 96.1228 |
| <i>R. chaudhurii</i> (Preston, 1912) | Myanmar: Ayeyarwady Basin, Lake Indaw                           | RMBH: biv 605/1 | OL597718 | n/a      | n/a      | 24.2665 | 96.1228 |
| <i>R. chaudhurii</i> (Preston, 1912) | Myanmar: Ayeyarwady Basin, Lake Indaw                           | RMBH: biv 605/2 | OL597719 | n/a      | n/a      | 24.2665 | 96.1228 |
| <i>R. chaudhurii</i> (Preston, 1912) | Myanmar: Ayeyarwady Basin, Lake Indaw                           | RMBH: biv 605/3 | OL597720 | n/a      | n/a      | 24.2665 | 96.1228 |
| <i>R. chaudhurii</i> (Preston, 1912) | Myanmar: Ayeyarwady Basin, Lake Indaw                           | RMBH: biv 606/2 | OL597721 | n/a      | n/a      | 24.2665 | 96.1228 |
| <i>R. chaudhurii</i> (Preston, 1912) | Myanmar: Ayeyarwady Basin, Nant Poat Kalay River                | RMBH: biv 610/1 | OL597722 | n/a      | n/a      | 24.2130 | 96.1089 |
| <i>R. chaudhurii</i> (Preston, 1912) | Myanmar: Ayeyarwady Basin, Nant Poat Kalay River                | RMBH: biv 610/2 | OL597723 | n/a      | n/a      | 24.2130 | 96.1089 |
| <i>R. chaudhurii</i> (Preston, 1912) | Myanmar: Ayeyarwady Basin, Nant Poat Kalay River                | RMBH: biv 611/1 | OL597724 | n/a      | n/a      | 24.2130 | 96.1089 |
| <i>R. chaudhurii</i> (Preston, 1912) | Myanmar: Ayeyarwady Basin, Nant Poat Kalay River                | RMBH: biv 611/2 | OL597725 | n/a      | n/a      | 24.2130 | 96.1089 |
| <i>R. chaudhurii</i> (Preston, 1912) | Myanmar: Ayeyarwady Basin, Lake Indaw                           | RMBH: biv 614/1 | OL597726 | n/a      | n/a      | 24.2123 | 96.0819 |
| <i>R. chaudhurii</i> (Preston, 1912) | Myanmar: Ayeyarwady Basin, Lake Indaw                           | RMBH: biv 614/2 | OL597727 | n/a      | n/a      | 24.2123 | 96.0819 |
| <i>R. chaudhurii</i> (Preston, 1912) | Myanmar: Ayeyarwady Basin, Shweli River                         | RMBH: biv 913/1 | OL597728 | n/a      | n/a      | 24.0171 | 96.4729 |
| <i>R. chaudhurii</i> (Preston, 1912) | Myanmar: Ayeyarwady Basin, Shweli River                         | RMBH: biv 913/2 | OL597729 | n/a      | n/a      | 24.0171 | 96.4729 |
| <i>R. chaudhurii</i> (Preston, 1912) | Myanmar: Ayeyarwady Basin, Shweli River                         | RMBH: biv 913/3 | OL597730 | n/a      | n/a      | 24.0171 | 96.4729 |
| <i>R. chaudhurii</i> (Preston, 1912) | Myanmar: Ayeyarwady Basin, Mole Stream                          | RMBH: biv 920/1 | OL597731 | OL598375 | n/a      | 24.4010 | 97.2544 |
| <i>R. chaudhurii</i> (Preston, 1912) | Myanmar: Ayeyarwady Basin, Mole Stream                          | RMBH: biv 920/2 | OL597732 | n/a      | n/a      | 24.4010 | 97.2544 |
| <i>R. chaudhurii</i> (Preston, 1912) | Myanmar: Ayeyarwady Basin, Mole Stream                          | RMBH: biv 920/3 | OL597733 | n/a      | n/a      | 24.4010 | 97.2544 |
| <i>R. chaudhurii</i> (Preston, 1912) | Myanmar: Ayeyarwady Basin, Mole Stream                          | RMBH: biv 921/1 | OL597734 | OL598376 | n/a      | 24.4010 | 97.2544 |
| <i>R. chaudhurii</i> (Preston, 1912) | Myanmar: Ayeyarwady Basin, Mole Stream                          | RMBH: biv 921/2 | OL597735 | n/a      | n/a      | 24.4010 | 97.2544 |
| <i>R. chaudhurii</i> (Preston, 1912) | Myanmar: Ayeyarwady Basin, Mole Stream                          | RMBH: biv 921/3 | OL597736 | n/a      | n/a      | 24.4010 | 97.2544 |
| <i>R. myitkyinae</i> (Prashad, 1930) | Myanmar: Ayeyarwady Basin, Lake Indawgyi                        | RMBH: biv 107/1 | KX865838 | KX865609 | KX865710 | 25.1099 | 96.2925 |
| <i>R. myitkyinae</i> (Prashad, 1930) | Myanmar: Ayeyarwady Basin, Lake Indawgyi                        | RMBH: biv 107/2 | KX865839 | KX865610 | KX865711 | 25.1099 | 96.2925 |
| <i>R. myitkyinae</i> (Prashad, 1930) | Myanmar: Ayeyarwady Basin, Lake Indawgyi                        | RMBH: biv 107/3 | KX865840 | KX865611 | KX865712 | 25.1099 | 96.2925 |

|                                                                                    |                                                              |                  |          |          |          |         |         |
|------------------------------------------------------------------------------------|--------------------------------------------------------------|------------------|----------|----------|----------|---------|---------|
| <i>R. myitkyinae</i> (Prashad, 1930)                                               | Myanmar: Ayeyarwady Basin, Lake Indawgyi                     | RMBH: biv 106/1  | KX865841 | KX865612 | KX865713 | 25.1099 | 96.2925 |
| <i>R. myitkyinae</i> (Prashad, 1930)                                               | Myanmar: Ayeyarwady Basin, Lake Indawgyi                     | RMBH: biv 106/2  | KX865843 | KX865613 | KX865715 | 25.1099 | 96.2925 |
| <i>R. myitkyinae</i> (Prashad, 1930)                                               | Myanmar: Ayeyarwady Basin, Lake Indawgyi                     | RMBH: biv 106/3  | KX865842 | KX865614 | KX865714 | 25.1099 | 96.2925 |
| <i>R. myitkyinae</i> (Prashad, 1930)                                               | Myanmar: Ayeyarwady Basin, Mogaung River                     | RMBH: biv 971/1  | OL597737 | n/a      | n/a      | 25.3151 | 96.9326 |
| <i>R. myitkyinae</i> (Prashad, 1930)                                               | Myanmar: Ayeyarwady Basin, Mogaung River                     | RMBH: biv 971/2  | OL597738 | n/a      | n/a      | 25.3151 | 96.9326 |
| <i>R. myitkyinae</i> (Prashad, 1930)                                               | Myanmar: Ayeyarwady Basin, Mogaung River                     | RMBH: biv 971/3  | OL597739 | n/a      | n/a      | 25.3151 | 96.9326 |
| <i>R. crispisulcata</i> (Benson, 1862)                                             | Myanmar: Ayeyarwady Basin, Nga Wun River                     | RMBH: biv 671/1  | MN275081 | MN307267 | MN307209 | 18.8624 | 95.2822 |
| <i>R. crispisulcata</i> (Benson, 1862)                                             | Myanmar: Ayeyarwady Basin, Nga Wun River                     | RMBH: biv 671/2  | MN275082 | MN307268 | MN307210 | 18.8624 | 95.2822 |
| <i>R. crispisulcata</i> (Benson, 1862)                                             | Myanmar: Ayeyarwady Basin, Nga Wun River                     | RMBH: biv 671/3  | MN275083 | MN307269 | MN307211 | 18.8624 | 95.2822 |
| <i>R. chindwinensis</i> Bolotov et al., 2019                                       | Myanmar: Ayeyarwady Basin, Myit Tha (Manipur) River          | RMBH: biv 345/1  | MK372404 | MK372452 | MK372482 | 23.2006 | 94.2214 |
| <i>R. chindwinensis</i> Bolotov et al., 2019                                       | Myanmar: Ayeyarwady Basin, Myit Tha (Manipur) River          | RMBH: biv 345/2  | MK372405 | MK372453 | MK372483 | 23.2006 | 94.2214 |
| <i>R. chindwinensis</i> Bolotov et al., 2019                                       | Myanmar: Ayeyarwady Basin, Chindwin River                    | RMBH: biv 348/2  | MK372410 | MK372458 | MK372488 | 23.1918 | 94.3217 |
| <i>R. chindwinensis</i> Bolotov et al., 2019                                       | Myanmar: Ayeyarwady Basin, tributary of Nay Chin Sayar River | RMBH: biv 357/1  | MK372414 | MK372462 | MK372492 | 23.4160 | 94.0875 |
| <i>R. chindwinensis</i> Bolotov et al., 2019                                       | Myanmar: Ayeyarwady Basin, tributary of Nay Chin Sayar River | RMBH: biv 357/2  | MK372415 | n/a      | n/a      | 23.4160 | 94.0875 |
| <i>R. chindwinensis</i> Bolotov et al., 2019                                       | Myanmar: Ayeyarwady Basin, tributary of Nay Chin Sayar River | RMBH: biv 357/3  | MK372416 | n/a      | n/a      | 23.4160 | 94.0875 |
| <i>R. myitthanensis</i> Bolotov et al., 2019                                       | Myanmar: Ayeyarwady Basin, Myit Tha (Manipur) River          | RMBH biv 337/3   | MK372396 | MK372450 | MK372477 | 23.2285 | 94.1434 |
| <i>R. myitthanensis</i> Bolotov et al., 2019                                       | Myanmar: Ayeyarwady Basin, Chindwin River                    | RMBH biv 348/1   | MK372409 | MK372457 | MK372487 | 23.1918 | 94.3217 |
| <b>Lamellidentini Modell, 1942</b>                                                 |                                                              |                  |          |          |          |         |         |
| <b><i>Trapezidens</i> Bolotov, Vikhrev &amp; Konopleva in Bolotov et al., 2017</b> |                                                              |                  |          |          |          |         |         |
| <i>Trapezidens exolescens</i> (Gould, 1843)                                        | Myanmar: Dawei River                                         | RMBH: biv 145/3  | KX230532 | KX230548 | KX230559 | 14.5013 | 98.1558 |
| <i>T. exolescens</i> (Gould, 1843)                                                 | Myanmar: Dawei River                                         | RMBH: biv 145/12 | KX230535 | KX230549 | KX230560 | 14.5013 | 98.1558 |
| <i>T. exolescens</i> (Gould, 1843)                                                 | Myanmar: Dawei River                                         | RMBH: biv 145/21 | KX230536 | KX230550 | KX230561 | 14.5013 | 98.1558 |
| <i>T. exolescens</i> (Gould, 1843)                                                 | Myanmar: Dawei River                                         | RMBH: biv 146/2  | KX230537 | KX230551 | KX230562 | 14.5013 | 98.1558 |
| <i>T. exolescens</i> (Gould, 1843)                                                 | Myanmar: Dawei River                                         | RMBH: biv 146/11 | KX230539 | n/a      | n/a      | 14.5013 | 98.1558 |
| <i>T. exolescens</i> (Gould, 1843)                                                 | Myanmar: Dawei River                                         | RMBH: biv 146/14 | KX230540 | KX230552 | KX230563 | 14.5013 | 98.1558 |
| <i>T. exolescens</i> (Gould, 1843)                                                 | Myanmar: Dawei River                                         | RMBH: biv 146/23 | KX230542 | KX230542 | KX230564 | 14.5013 | 98.1558 |
| <i>T. scutum</i> (Sowerby, 1868)                                                   | Myanmar: Tanintharyi Basin, Nga Wun River                    | RMBH: biv 630/1  | MN275084 | MN307270 | MN307212 | 11.8567 | 99.1181 |
| <i>T. scutum</i> (Sowerby, 1868)                                                   | Myanmar: Tanintharyi Basin, Nga Wun River                    | RMBH: biv 630/2  | MN275085 | MN307271 | MN307213 | 11.8567 | 99.1181 |

|                                                     |                                               |                    |          |          |          |         |         |
|-----------------------------------------------------|-----------------------------------------------|--------------------|----------|----------|----------|---------|---------|
| <i>T. scutum</i> (Sowerby, 1868)                    | Myanmar: Tanintharyi Basin, Nga Wun River     | RMBH: biv 632/1    | MN275086 | MN307272 | MN307214 | 11.8567 | 99.1181 |
| <i>T. scutum</i> (Sowerby, 1868)                    | Myanmar: Tanintharyi Basin, Nga Wun River     | RMBH: biv 632/2    | MN780892 | n/a      | n/a      | 11.8567 | 99.1181 |
| <i>T. scutum</i> (Sowerby, 1868)                    | Myanmar: Tanintharyi Basin, Nga Wun Stream    | RMBH: biv 644      | MN780893 | n/a      | n/a      | 11.8233 | 99.1493 |
| <i>T. scutum</i> (Sowerby, 1868)                    | Myanmar: Tanintharyi Basin, Nga Wun Stream    | RMBH: biv 645/1    | MN780894 | n/a      | n/a      | 11.8233 | 99.1493 |
| <i>T. angustior</i> (Hanley & Theobald, 1876)       | Myanmar: Sittaung Basin, Myit Kyi Pauk Stream | RMBH: biv 250/4    | MF352238 | MF352308 | MF352366 | 18.9613 | 96.4455 |
| <i>T. angustior</i> (Hanley & Theobald, 1876)       | Myanmar: Sittaung Basin, Myit Kyi Pauk Stream | RMBH: biv 250/7    | MF352239 | MF352309 | MF352367 | 18.9613 | 96.4455 |
| <i>T. angustior</i> (Hanley & Theobald, 1876)       | Myanmar: Sittaung Basin, Myit Kyi Pauk Stream | RMBH: biv 250/8    | MF352240 | MF352310 | MF352310 | 18.9613 | 96.4455 |
| <i>T. angustior</i> (Hanley & Theobald, 1876)       | Myanmar: Sittaung Basin, Thauk Ye Kupt River  | RMBH: biv 255/1    | MF352253 | MF352320 | MF352378 | 18.9840 | 96.4361 |
| <i>T. angustior</i> (Hanley & Theobald, 1876)       | Myanmar: Bilin River                          | RMBH: biv 370/1    | MN275087 | MN307273 | MN307215 | 17.3306 | 97.2418 |
| <i>T. angustior</i> (Hanley & Theobald, 1876)       | Myanmar: Bilin River                          | RMBH: biv 370/2    | MN780875 | n/a      | n/a      | 17.3306 | 97.2418 |
| <i>T. angustior</i> (Hanley & Theobald, 1876)       | Myanmar: Bilin River                          | RMBH: biv 370/3    | MN780876 | n/a      | n/a      | 17.3306 | 97.2418 |
| <i>T. angustior</i> (Hanley & Theobald, 1876)       | Myanmar: Bago River                           | RMBH: biv 382/1    | MN780877 | n/a      | n/a      | 17.9769 | 96.7659 |
| <i>T. angustior</i> (Hanley & Theobald, 1876)       | Myanmar: Bago River                           | RMBH: biv 382/2    | MN780878 | n/a      | n/a      | 17.9769 | 96.7659 |
| <i>T. angustior</i> (Hanley & Theobald, 1876)       | Myanmar: Bago River                           | RMBH: biv 382/3    | MN780879 | n/a      | n/a      | 17.5334 | 96.3315 |
| <i>T. angustior</i> (Hanley & Theobald, 1876)       | Myanmar: Bago Basin, Moload Stream            | RMBH: biv 385/1    | MN780880 | n/a      | n/a      | 17.5334 | 96.3315 |
| <i>T. angustior</i> (Hanley & Theobald, 1876)       | Myanmar: Bago Basin, Kyak Phar Stream         | RMBH: biv 387/3    | MN780881 | n/a      | n/a      | 17.5334 | 96.3315 |
| <i>T. angustior</i> (Hanley & Theobald, 1876)       | Myanmar: Bago Basin, Kyak Phar Stream         | RMBH: biv 388/1    | MN780882 | n/a      | n/a      | 17.6011 | 96.2861 |
| <i>T. angustior</i> (Hanley & Theobald, 1876)       | Myanmar: Bago Basin, Kyak Phar Stream         | RMBH: biv 388/2    | MN780883 | n/a      | n/a      | 17.6660 | 96.2465 |
| <i>T. angustior</i> (Hanley & Theobald, 1876)       | Myanmar: Bago Basin, Kyak Phar Stream         | RMBH: biv 388/3    | MN780884 | n/a      | n/a      | 17.6660 | 96.2465 |
| <i>T. angustior</i> (Hanley & Theobald, 1876)       | Myanmar: Sittaung Basin, Chain Stream         | RMBH: biv 394/1    | MN275088 | n/a      | n/a      | 17.6660 | 96.2465 |
| <i>T. angustior</i> (Hanley & Theobald, 1876)       | Myanmar: Sittaung Basin, Chain Stream         | RMBH: biv 394/3    | MN780885 | n/a      | n/a      | 17.6660 | 96.2465 |
| <i>T. dolichorhynchus</i> (Tapparone Canefri, 1889) | Myanmar: Ayeyarwady River                     | UA<USA-AL>:20729.1 | JN243903 | KP795042 | JN243881 | 21.4819 | 95.3050 |
| <i>T. dolichorhynchus</i> (Tapparone Canefri, 1889) | Myanmar: Ayeyarwady Basin, Manipur River      | RMBH: biv 336/1    | MN780869 | n/a      | n/a      | 23.2285 | 94.1434 |
| <i>T. dolichorhynchus</i> (Tapparone Canefri, 1889) | Myanmar: Ayeyarwady Basin, Manipur River      | RMBH: biv 336/2    | MN780870 | n/a      | n/a      | 23.2285 | 94.1434 |
| <i>T. dolichorhynchus</i> (Tapparone Canefri, 1889) | Myanmar: Ayeyarwady Basin, Manipur River      | RMBH: biv 336/3    | MN275090 | n/a      | MN307217 | 23.2285 | 94.1434 |
| <i>T. dolichorhynchus</i> (Tapparone Canefri, 1889) | Myanmar: Ayeyarwady Basin, Chindwin River     | RMBH: biv 353      | MN780871 | n/a      | n/a      | 23.1499 | 94.3629 |
| <i>T. dolichorhynchus</i> (Tapparone Canefri, 1889) | Myanmar: Ayeyarwady Basin, Chindwin River     | RMBH: biv 354/1    | MN780872 | n/a      | n/a      | 23.1499 | 94.3629 |
| <i>T. dolichorhynchus</i> (Tapparone Canefri, 1889) | Myanmar: Ayeyarwady Basin, Chindwin River     | RMBH: biv 354/2    | MN780873 | n/a      | n/a      | 23.1499 | 94.3629 |
| <i>T. dolichorhynchus</i> (Tapparone Canefri, 1889) | Myanmar: Ayeyarwady Basin, Chindwin River     | RMBH: biv 354/3    | MN780874 | n/a      | n/a      | 23.1499 | 94.3629 |

|                                                        |                                                       |                     |          |          |          |         |         |
|--------------------------------------------------------|-------------------------------------------------------|---------------------|----------|----------|----------|---------|---------|
| <i>T. dolichorhynchus</i><br>(Tapparone Canefri, 1889) | Myanmar:<br>Ayeyarwady River<br>near Tant Kyi village | RMBH: biv<br>417/1  | MN275089 | MN307274 | MN307216 | 21.1567 | 94.8050 |
| <i>T. dolichorhynchus</i><br>(Tapparone Canefri, 1889) | Myanmar:<br>Ayeyarwady River<br>near Tant Kyi village | RMBH: biv<br>417/2  | MN780886 | n/a      | n/a      | 21.1567 | 94.8050 |
| <i>T. dolichorhynchus</i><br>(Tapparone Canefri, 1889) | Myanmar:<br>Ayeyarwady River<br>near Tant Kyi village | RMBH: biv<br>417/3  | MN780887 | n/a      | n/a      | 21.1567 | 94.8050 |
| <i>T. dolichorhynchus</i><br>(Tapparone Canefri, 1889) | Myanmar:<br>Ayeyarwady River at<br>Mandalay city      | RMBH: biv<br>442/1  | OL597740 | n/a      | n/a      | 21.9909 | 96.0610 |
| <i>T. dolichorhynchus</i><br>(Tapparone Canefri, 1889) | Myanmar:<br>Ayeyarwady River at<br>Mandalay city      | RMBH: biv<br>442/2  | OL597741 | n/a      | n/a      | 21.9909 | 96.0610 |
| <i>T. yeti</i> Konopleva et al.,<br>2020               | Myanmar: Ye River                                     | RMBH: biv<br>616/1  | MN780888 | MN759081 | MN759085 | 15.2957 | 97.9984 |
| <i>T. yeti</i> Konopleva et al.,<br>2020               | Myanmar: Ye River                                     | RMBH: biv<br>616/2  | MN780889 | MN759082 | MN759086 | 15.2957 | 97.9984 |
| <i>T. yeti</i> Konopleva et al.,<br>2020               | Myanmar: Ye River                                     | RMBH: biv<br>617/1  | MN780890 | MN759083 | MN759087 | 15.2957 | 97.9984 |
| <i>T. yeti</i> Konopleva et al.,<br>2020               | Myanmar: Ye River                                     | RMBH: biv<br>617/2  | MN780891 | MN759084 | MN759088 | 15.2957 | 97.9984 |
| <b>Lamellidens Simpson, 1900</b>                       |                                                       |                     |          |          |          |         |         |
| <i>Lamellidens savadiensis</i><br>(Nevill, 1877)       | Myanmar:<br>Ayeyarwady Basin,<br>Lake Indawgyi        | RMBH: biv<br>109/1  | KX230544 | KX230555 | KX230566 | 25.1099 | 96.2925 |
| <i>L. savadiensis</i> (Nevill,<br>1877)                | Myanmar:<br>Ayeyarwady Basin,<br>Lake Indawgyi        | RMBH: biv<br>109/2  | KX230545 | KX230556 | KX230567 | 25.1099 | 96.2925 |
| <i>L. savadiensis</i> (Nevill,<br>1877)                | Myanmar:<br>Ayeyarwady Basin,<br>Lake Indawgyi        | RMBH: biv<br>109/3  | KX230546 | KX230557 | KX230568 | 25.1099 | 96.2925 |
| <i>L. savadiensis</i> (Nevill,<br>1877)                | Myanmar: Sittaung<br>Basin, Pathi River               | RMBH: biv<br>242/8  | MF352220 | MF352294 | MF352352 | 19.0278 | 96.5353 |
| <i>L. savadiensis</i> (Nevill,<br>1877)                | Myanmar: Sittaung<br>Basin, Pathi River               | RMBH: biv<br>242/15 | MF352221 | MF352295 | MF352353 | 19.0278 | 96.5353 |
| <i>L. savadiensis</i> (Nevill,<br>1877)                | Myanmar: Sittaung<br>Basin, fishing pond              | RMBH: biv<br>247/8  | MF352231 | MF352303 | MF352361 | 18.9593 | 96.4831 |
| <i>L. savadiensis</i> (Nevill,<br>1877)                | Myanmar: Sittaung<br>Basin, fishing pond              | RMBH: biv<br>247/14 | MF352233 | n/a      | n/a      | 18.9593 | 96.4831 |
| <i>L. savadiensis</i> (Nevill,<br>1877)                | Myanmar:<br>Ayeyarwady Basin,<br>Lake Nant Phar       | RMBH: biv<br>257/1  | MF352258 | MF352322 | MF352383 | 24.2972 | 97.2610 |
| <i>L. savadiensis</i> (Nevill,<br>1877)                | Myanmar:<br>Ayeyarwady Basin,<br>Lake Nant Phar       | RMBH: biv<br>257/6  | MF352259 | MF352323 | MF352384 | 24.2972 | 97.2610 |
| <i>L. savadiensis</i> (Nevill,<br>1877)                | Myanmar:<br>Ayeyarwady Basin,<br>Lake Nant Phar       | RMBH: biv<br>257/9  | MF352260 | MF352324 | MF352385 | 24.2972 | 97.2610 |
| <i>L. savadiensis</i> (Nevill,<br>1877)                | Myanmar:<br>Ayeyarwady Basin,<br>Lake Shwe Kyi        | RMBH: biv<br>261/3  | MF352269 | MF352333 | MF352393 | 24.2927 | 97.2299 |
| <i>L. savadiensis</i> (Nevill,<br>1877)                | Myanmar:<br>Ayeyarwady Basin,<br>Lake Shwe Kyi        | RMBH: biv<br>261/6  | MF352270 | MF352334 | MF352394 | 24.2927 | 97.2299 |
| <i>L. savadiensis</i> (Nevill,<br>1877)                | Myanmar:<br>Ayeyarwady Basin,<br>Lake Shwe Kyi        | RMBH: biv<br>261/7  | MF352271 | n/a      | n/a      | 24.2927 | 97.2299 |
| <i>L. savadiensis</i> (Nevill,<br>1877)                | Myanmar:<br>Ayeyarwady Basin,<br>Nant Sa Yi River     | RMBH: biv<br>262/1  | MF352272 | MF352335 | MF352395 | 24.2196 | 97.2224 |
| <i>L. savadiensis</i> (Nevill,<br>1877)                | Myanmar:<br>Ayeyarwady Basin,<br>Nant Sa Yi River     | RMBH: biv<br>262/2  | MF352273 | n/a      | n/a      | 24.2196 | 97.2224 |
| <i>L. savadiensis</i> (Nevill,<br>1877)                | Myanmar:<br>Ayeyarwady Basin,<br>Nant Sa Yi River     | RMBH: biv<br>262/4  | MF352274 | MF352336 | MF352396 | 24.2196 | 97.2224 |
| <i>L. savadiensis</i> (Nevill,<br>1877)                | Myanmar:<br>Ayeyarwady Basin,<br>Lake Myaung          | RMBH: biv<br>264/1  | MF352277 | MF352339 | MF352398 | 24.2387 | 97.1658 |
| <i>L. savadiensis</i> (Nevill,<br>1877)                | Myanmar:<br>Ayeyarwady Basin,<br>Lake Myaung          | RMBH: biv<br>264/4  | MF352278 | n/a      | n/a      | 24.2387 | 97.1658 |
| <i>L. savadiensis</i> (Nevill,<br>1877)                | Myanmar:<br>Ayeyarwady Basin,<br>Lake Myaung          | RMBH: biv<br>264/7  | MF352279 | MF352340 | MF352399 | 24.2387 | 97.1658 |

|                                      |                                                                   |                  |          |          |          |         |         |
|--------------------------------------|-------------------------------------------------------------------|------------------|----------|----------|----------|---------|---------|
| <i>L. savadiensis</i> (Nevill, 1877) | Myanmar: Salween Basin, Lake Nadi                                 | RMBH: biv 399/1  | OL597742 | n/a      | n/a      | 20.6858 | 96.9316 |
| <i>L. savadiensis</i> (Nevill, 1877) | Myanmar: Salween Basin, Lake Nadi                                 | RMBH: biv 399/2  | OL597743 | n/a      | n/a      | 20.6858 | 96.9316 |
| <i>L. savadiensis</i> (Nevill, 1877) | Myanmar: Sittaung Basin, Hnit Saung Pyang Stream                  | RMBH: biv 408    | OL597744 | n/a      | n/a      | 19.5140 | 96.2621 |
| <i>L. savadiensis</i> (Nevill, 1877) | Myanmar: Sittaung Basin, Sin Thay Dam                             | RMBH: biv 413/1  | OL597745 | n/a      | OL598395 | 20.1540 | 96.1149 |
| <i>L. savadiensis</i> (Nevill, 1877) | Myanmar: Sittaung Basin, Sin Thay Dam                             | RMBH: biv 413/2  | OL597746 | n/a      | n/a      | 20.1540 | 96.1149 |
| <i>L. savadiensis</i> (Nevill, 1877) | Myanmar: Sittaung Basin, Sin Thay Dam                             | RMBH: biv 413/3  | OL597747 | n/a      | n/a      | 20.1540 | 96.1149 |
| <i>L. savadiensis</i> (Nevill, 1877) | Myanmar: Ayeyarwady Basin, Mone Ding Dam outlet                   | RMBH: biv 415/1  | OL597748 | n/a      | OL598396 | 20.8099 | 95.7242 |
| <i>L. savadiensis</i> (Nevill, 1877) | Myanmar: Ayeyarwady Basin, Mone Ding Dam outlet                   | RMBH: biv 415/2  | OL597749 | n/a      | n/a      | 20.8099 | 95.7242 |
| <i>L. savadiensis</i> (Nevill, 1877) | Myanmar: Ayeyarwady Basin, Mone Ding Dam outlet                   | RMBH: biv 415/3  | OL597750 | n/a      | n/a      | 20.8099 | 95.7242 |
| <i>L. savadiensis</i> (Nevill, 1877) | Myanmar: Ayeyarwady Basin, Mone Ding Dam outlet                   | RMBH: biv 416/1  | OL597751 | n/a      | n/a      | 20.8099 | 95.7242 |
| <i>L. savadiensis</i> (Nevill, 1877) | Myanmar: Ayeyarwady Basin, Mone Ding Dam outlet                   | RMBH: biv 416/2  | OL597752 | n/a      | OL598397 | 20.8099 | 95.7242 |
| <i>L. savadiensis</i> (Nevill, 1877) | Myanmar: Ayeyarwady Basin, Mone Ding Dam outlet                   | RMBH: biv 416/3  | OL597753 | n/a      | n/a      | 20.8099 | 95.7242 |
| <i>L. savadiensis</i> (Nevill, 1877) | Myanmar: Ayeyarwady Basin, ox-bow lake near Ta Naung Taig village | RMBH: biv 427A/1 | OL597754 | n/a      | OL598398 | 21.4064 | 95.3399 |
| <i>L. savadiensis</i> (Nevill, 1877) | Myanmar: Ayeyarwady Basin, ox-bow lake near Ta Naung Taig village | RMBH: biv 427A/2 | OL597755 | n/a      | n/a      | 21.4064 | 95.3399 |
| <i>L. savadiensis</i> (Nevill, 1877) | Myanmar: Ayeyarwady River at Mandalay city                        | RMBH: biv 442/3  | OL597756 | n/a      | n/a      | 21.9909 | 96.0610 |
| <i>L. generosus</i> (Gould, 1847)    | Myanmar: Sittaung Basin, Pathi River                              | RMBH: biv 242/3  | MF352219 | MF352293 | MF352351 | 19.0278 | 96.5353 |
| <i>L. generosus</i> (Gould, 1847)    | Myanmar: Sittaung Basin, Pathi River                              | RMBH: biv 243/10 | MF352222 | MF352296 | MF352354 | 19.0278 | 96.5353 |
| <i>L. generosus</i> (Gould, 1847)    | Myanmar: Sittaung Basin, Pathi River                              | RMBH: biv 243/12 | MF352223 | MF352297 | MF352355 | 19.0278 | 96.5353 |
| <i>L. generosus</i> (Gould, 1847)    | Myanmar: Sittaung Basin, Pathi River                              | RMBH: biv 243/14 | MF352224 | n/a      | n/a      | 19.0278 | 96.5353 |
| <i>L. generosus</i> (Gould, 1847)    | Myanmar: Sittaung Basin, reservoir of Yetho River                 | RMBH: biv 244/2  | MF352225 | n/a      | n/a      | 18.8457 | 96.3012 |
| <i>L. generosus</i> (Gould, 1847)    | Myanmar: Sittaung Basin, reservoir of Yetho River                 | RMBH: biv 244/3  | MF352226 | MF352298 | MF352356 | 18.8457 | 96.3012 |
| <i>L. generosus</i> (Gould, 1847)    | Myanmar: Sittaung Basin, reservoir of Yetho River                 | RMBH: biv 244/5  | MF352227 | MF352299 | MF352357 | 18.8457 | 96.3012 |
| <i>L. generosus</i> (Gould, 1847)    | Myanmar: Sittaung Basin, fishing pond                             | RMBH: biv 247/10 | MF352232 | MF352304 | MF352362 | 18.9593 | 96.4831 |
| <i>L. generosus</i> (Gould, 1847)    | Myanmar: Sittaung River near Taungoo                              | RMBH: biv 250/13 | MF352241 | MF352311 | MF352369 | 18.9613 | 96.4455 |
| <i>L. generosus</i> (Gould, 1847)    | Myanmar: Ayeyarwady Basin, Kalemmyo market                        | RMBH: biv 355/1  | OL597757 | n/a      | OL598399 | 23.1746 | 94.0423 |
| <i>L. generosus</i> (Gould, 1847)    | Myanmar: Ayeyarwady Basin, Kalemmyo market                        | RMBH: biv 355/2  | OL597758 | n/a      | n/a      | 23.1746 | 94.0423 |

|                                   |                                                                 |                 |          |     |          |         |         |
|-----------------------------------|-----------------------------------------------------------------|-----------------|----------|-----|----------|---------|---------|
| <i>L. generosus</i> (Gould, 1847) | Myanmar: Ayeyarwady Basin, Kalemmyo market                      | RMBH: biv 355/3 | OL597759 | n/a | n/a      | 23.1746 | 94.0423 |
| <i>L. generosus</i> (Gould, 1847) | Myanmar: Ayeyarwady Basin, fish pond near Kalemmyo              | RMBH: biv 356/1 | OL597760 | n/a | n/a      | 23.1746 | 94.0423 |
| <i>L. generosus</i> (Gould, 1847) | Myanmar: Ayeyarwady Basin, fish pond near Kalemmyo              | RMBH: biv 356/2 | OL597761 | n/a | OL598400 | 23.1746 | 94.0423 |
| <i>L. generosus</i> (Gould, 1847) | Myanmar: Ayeyarwady Basin, fish pond near Kalemmyo              | RMBH: biv 356/3 | OL597762 | n/a | n/a      | 23.1746 | 94.0423 |
| <i>L. generosus</i> (Gould, 1847) | Myanmar: Ayeyarwady Basin, tributary of Nay Chin Sayar River    | RMBH: biv 358/1 | OL597763 | n/a | OL598401 | 23.4160 | 94.0875 |
| <i>L. generosus</i> (Gould, 1847) | Myanmar: Ayeyarwady Basin, tributary of Nay Chin Sayar River    | RMBH: biv 358/2 | OL597764 | n/a | n/a      | 23.4160 | 94.0875 |
| <i>L. generosus</i> (Gould, 1847) | Myanmar: Ayeyarwady Basin, tributary of Nay Chin Sayar River    | RMBH: biv 358/3 | OL597765 | n/a | n/a      | 23.4160 | 94.0875 |
| <i>L. generosus</i> (Gould, 1847) | Myanmar: tributary of Haungthayaw River                         | RMBH: biv 359/1 | OL597766 | n/a | n/a      | 16.6104 | 98.0110 |
| <i>L. generosus</i> (Gould, 1847) | Myanmar: tributary of Haungthayaw River                         | RMBH: biv 359/3 | OL597767 | n/a | OL598402 | 16.6104 | 98.0110 |
| <i>L. generosus</i> (Gould, 1847) | Myanmar: Haungthayaw River upStream of Kawkareik town           | RMBH: biv 363/1 | OL597768 | n/a | OL598403 | 16.4714 | 98.2183 |
| <i>L. generosus</i> (Gould, 1847) | Myanmar: Haungthayaw River upStream of Kawkareik town           | RMBH: biv 363/2 | OL597769 | n/a | n/a      | 16.4714 | 98.2183 |
| <i>L. generosus</i> (Gould, 1847) | Myanmar: Haungthayaw River upStream of Kawkareik town           | RMBH: biv 363/3 | OL597770 | n/a | n/a      | 16.4714 | 98.2183 |
| <i>L. generosus</i> (Gould, 1847) | Myanmar: Haungthayaw Basin, Stream near Kawkareik town          | RMBH: biv 364/1 | OL597771 | n/a | OL598404 | 16.5365 | 98.2202 |
| <i>L. generosus</i> (Gould, 1847) | Myanmar: Haungthayaw Basin, Stream near Kawkareik town          | RMBH: biv 364/3 | OL597772 | n/a | n/a      | 16.5365 | 98.2202 |
| <i>L. generosus</i> (Gould, 1847) | Myanmar: Haungthayaw Basin, ox-bow lake south of Hpa-An airport | RMBH: biv 365/1 | OL597773 | n/a | OL598405 | 16.8819 | 97.6629 |
| <i>L. generosus</i> (Gould, 1847) | Myanmar: Haungthayaw Basin, ox-bow lake south of Hpa-An airport | RMBH: biv 365/2 | OL597774 | n/a | n/a      | 16.8819 | 97.6629 |
| <i>L. generosus</i> (Gould, 1847) | Myanmar: Salween Basin, Mizan Stream                            | RMBH: biv 366/2 | OL597775 | n/a | OL598406 | 16.9770 | 97.6330 |
| <i>L. generosus</i> (Gould, 1847) | Myanmar: Salween Basin, Mizan Stream                            | RMBH: biv 366/3 | OL597776 | n/a | n/a      | 16.9770 | 97.6330 |
| <i>L. generosus</i> (Gould, 1847) | Myanmar: Bilin Basin, Lake Shwe Laung                           | RMBH: biv 372/1 | OL597777 | n/a | OL598407 | 17.4395 | 97.2457 |
| <i>L. generosus</i> (Gould, 1847) | Myanmar: Bilin Basin, Lake Shwe Laung                           | RMBH: biv 372/2 | OL597778 | n/a | n/a      | 17.4395 | 97.2457 |
| <i>L. generosus</i> (Gould, 1847) | Myanmar: Bilin Basin, Lake Shwe Laung                           | RMBH: biv 372/3 | OL597779 | n/a | n/a      | 17.4395 | 97.2457 |
| <i>L. generosus</i> (Gould, 1847) | Myanmar: Bago - Sittaung channel                                | RMBH: biv 376/1 | OL597780 | n/a | n/a      | 17.5818 | 96.7733 |
| <i>L. generosus</i> (Gould, 1847) | Myanmar: Bago - Sittaung channel                                | RMBH: biv 376/2 | OL597781 | n/a | n/a      | 17.5818 | 96.7733 |
| <i>L. generosus</i> (Gould, 1847) | Myanmar: Bago - Sittaung channel                                | RMBH: biv 376/3 | OL597782 | n/a | n/a      | 17.5818 | 96.7733 |
| <i>L. generosus</i> (Gould, 1847) | Myanmar: Lake Moeyungyi                                         | RMBH: biv 378/1 | OL597783 | n/a | n/a      | 17.5968 | 96.5950 |



|                                         |                                                           |                  |          |          |          |         |         |
|-----------------------------------------|-----------------------------------------------------------|------------------|----------|----------|----------|---------|---------|
| <i>L. generosus</i> (Gould, 1847)       | Myanmar: Lake Moeyungyi                                   | RMBH: biv 378/2  | OL597784 | n/a      | n/a      | 17.5968 | 96.5950 |
| <i>L. generosus</i> (Gould, 1847)       | Myanmar: Lake Moeyungyi                                   | RMBH: biv 378/3  | OL597785 | n/a      | n/a      | 17.5968 | 96.5950 |
| <i>L. generosus</i> (Gould, 1847)       | Myanmar: Bago Basin, pond near the Salu Dam               | RMBH: biv 379/1  | OL597786 | n/a      | n/a      | 17.5492 | 96.3736 |
| <i>L. generosus</i> (Gould, 1847)       | Myanmar: Bago Basin, pond near the Salu Dam               | RMBH: biv 379/2  | OL597787 | n/a      | n/a      | 17.5492 | 96.3736 |
| <i>L. generosus</i> (Gould, 1847)       | Myanmar: Bago Basin, pond near the Salu Dam               | RMBH: biv 379/3  | OL597788 | n/a      | n/a      | 17.5492 | 96.3736 |
| <i>L. generosus</i> (Gould, 1847)       | Myanmar: Bago River                                       | RMBH: biv 384/1  | OL597789 | n/a      | n/a      | 17.5334 | 96.3315 |
| <i>L. generosus</i> (Gould, 1847)       | Myanmar: Bago River                                       | RMBH: biv 384/2  | OL597790 | n/a      | OL598408 | 17.5334 | 96.3315 |
| <i>L. generosus</i> (Gould, 1847)       | Myanmar: Bago River                                       | RMBH: biv 384/3  | OL597791 | n/a      | n/a      | 17.5334 | 96.3315 |
| <i>L. generosus</i> (Gould, 1847)       | Myanmar: Bago Basin, Moload Stream                        | RMBH: biv 385/2  | OL597792 | n/a      | n/a      | 17.6011 | 96.2861 |
| <i>L. generosus</i> (Gould, 1847)       | Myanmar: Bago Basin, Moload Stream                        | RMBH: biv 385/3  | OL597793 | n/a      | n/a      | 17.6011 | 96.2861 |
| <i>L. generosus</i> (Gould, 1847)       | Myanmar: Bago Basin, Kyauk Phar Stream                    | RMBH: biv 387/1  | OL597794 | n/a      | n/a      | 17.6660 | 96.2465 |
| <i>L. generosus</i> (Gould, 1847)       | Myanmar: Bago Basin, Kyauk Phar Stream                    | RMBH: biv 387/2  | OL597795 | n/a      | n/a      | 17.6660 | 96.2465 |
| <i>L. generosus</i> (Gould, 1847)       | Myanmar: Bago Basin, Pagaing Stream                       | RMBH: biv 392/1  | OL597796 | n/a      | n/a      | 17.7080 | 96.7155 |
| <i>L. generosus</i> (Gould, 1847)       | Myanmar: Bago Basin, Pagaing Stream                       | RMBH: biv 392/2  | OL597797 | n/a      | n/a      | 17.7080 | 96.7155 |
| <i>L. generosus</i> (Gould, 1847)       | Myanmar: Bago Basin, Pagaing Stream                       | RMBH: biv 392/3  | OL597798 | n/a      | n/a      | 17.7080 | 96.7155 |
| <i>L. generosus</i> (Gould, 1847)       | Myanmar: Hlaingbwe Basin, Hlaingbwe Stream                | RMBH: biv 636/1  | OL597799 | n/a      | n/a      | 17.0292 | 97.8099 |
| <i>L. generosus</i> (Gould, 1847)       | Myanmar: Hlaingbwe Basin, Hlaingbwe Stream                | RMBH: biv 636/2  | OL597800 | OL598377 | OL598409 | 17.0292 | 97.8099 |
| <i>L. generosus</i> (Gould, 1847)       | Myanmar: Hlaingbwe Basin, Hlaingbwe Stream                | RMBH: biv 636/3  | OL597801 | OL598378 | OL598410 | 17.0292 | 97.8099 |
| <i>L. generosus</i> (Gould, 1847)       | Myanmar: Ayeyarwady Basin, Pathein River                  | RMBH: biv 648/1  | OL597802 | n/a      | n/a      | 17.4567 | 95.0086 |
| <i>L. generosus</i> (Gould, 1847)       | Myanmar: Ayeyarwady Basin, Pathein River                  | RMBH: biv 648/2  | OL597803 | n/a      | n/a      | 17.4567 | 95.0086 |
| <i>L. generosus</i> (Gould, 1847)       | Myanmar: Ayeyarwady Basin, Nga Wun River near Pyay city   | RMBH: biv 672/1  | OL597804 | n/a      | n/a      | 18.8624 | 95.2822 |
| <i>L. generosus</i> (Gould, 1847)       | Myanmar: Ayeyarwady Basin, Nga Wun River near Pyay city   | RMBH: biv 672/2  | OL597805 | n/a      | n/a      | 18.8624 | 95.2822 |
| <i>L. generosus</i> (Gould, 1847)       | Myanmar: Haungthayaw River                                | RMBH: biv 1024/1 | OL597806 | OL598379 | n/a      | 15.9620 | 98.4152 |
| <i>L. generosus</i> (Gould, 1847)       | Myanmar: Haungthayaw River                                | RMBH: biv 1024/2 | OL597807 | n/a      | n/a      | 15.9620 | 98.4152 |
| <i>L. generosus</i> (Gould, 1847)       | Myanmar: Haungthayaw River                                | RMBH: biv 1024/3 | OL597808 | n/a      | n/a      | 15.9620 | 98.4152 |
| <i>L. ferrugineus</i> (Annandale, 1918) | Myanmar: Salween Basin, Lake Inle, a channel in Nuangshve | RMBH: biv 112/7  | KX865828 | KX865599 | KX865702 | 20.6632 | 96.9310 |
| <i>L. ferrugineus</i> (Annandale, 1918) | Myanmar: Salween Basin, Lake Inle, a channel in Nuangshve | RMBH: biv 112/12 | KX865829 | KX865600 | KX865703 | 20.6632 | 96.9310 |
| <i>L. ferrugineus</i> (Annandale, 1918) | Myanmar: Salween Basin, Lake Inle, a channel in Nuangshve | RMBH: biv 112/15 | KX865830 | KX865601 | KX865704 | 20.6632 | 96.9310 |
| <i>L. ferrugineus</i> (Annandale, 1918) | Myanmar: Salween Basin, lower channel of Lake Inle        | RMBH: biv 113/8  | KX865825 | KX865596 | KX865699 | 20.4421 | 96.9037 |

|                                                                                    |                                                                |                  |          |          |          |         |         |
|------------------------------------------------------------------------------------|----------------------------------------------------------------|------------------|----------|----------|----------|---------|---------|
| <i>L. ferrugineus</i> (Annandale, 1918)                                            | Myanmar: Salween Basin, lower channel of Lake Inle             | RMBH: biv 113/12 | KX865826 | KX865597 | KX865700 | 20.4421 | 96.9037 |
| <i>L. ferrugineus</i> (Annandale, 1918)                                            | Myanmar: Salween Basin, lower channel of Lake Inle             | RMBH: biv 113/14 | KX865827 | KX865598 | KX865701 | 20.4421 | 96.9037 |
| <i>L. ferrugineus</i> (Annandale, 1918)                                            | Myanmar: Salween Basin, Nam Pilu River                         | RMBH: biv 141/5  | KX865831 | KX865602 | KX865705 | 19.6746 | 97.1352 |
| <i>L. ferrugineus</i> (Annandale, 1918)                                            | Myanmar: Salween Basin, Nam Pilu River                         | RMBH: biv 141/9  | KX865832 | KX865603 | KX865706 | 19.6746 | 97.1352 |
| <i>L. ferrugineus</i> (Annandale, 1918)                                            | Myanmar: Salween Basin, Nam Pilu River                         | RMBH: biv 141/18 | KX865833 | KX865604 | KX865707 | 19.6746 | 97.1352 |
| <i>L. ferrugineus</i> (Annandale, 1918)                                            | Myanmar: Salween Basin, Snake Stream                           | RMBH: biv 142/1  | KX865834 | KX865605 | KX865708 | 19.7266 | 97.0992 |
| <i>L. ferrugineus</i> (Annandale, 1918)                                            | Myanmar: Salween Basin, Lake Inle, Nan Lat Stream              | RMBH: biv 397/1  | OL597809 | n/a      | n/a      | 20.9162 | 96.9144 |
| <i>L. ferrugineus</i> (Annandale, 1918)                                            | Myanmar: Salween Basin, Lake Inle, Nan Lat Stream              | RMBH: biv 397/2  | OL597810 | n/a      | n/a      | 20.9162 | 96.9144 |
| <i>L. ferrugineus</i> (Annandale, 1918)                                            | Myanmar: Salween Basin, Lake Inle, tributary of Nan Lat Stream | RMBH: biv 398/3  | OL597811 | n/a      | n/a      | 21.0930 | 96.9282 |
| <i>L. ferrugineus</i> (Annandale, 1918)                                            | Myanmar: Salween Basin, Wain Kaun                              | RMBH: biv 401/1  | OL597812 | n/a      | n/a      | 20.1323 | 97.1957 |
| <i>L. ferrugineus</i> (Annandale, 1918)                                            | Myanmar: Salween Basin, Wain Kaun                              | RMBH: biv 401/2  | OL597813 | n/a      | n/a      | 20.1323 | 97.1957 |
| <i>L. ferrugineus</i> (Annandale, 1918)                                            | Myanmar: Salween Basin, Wain Kaun                              | RMBH: biv 401/3  | OL597814 | n/a      | n/a      | 20.1323 | 97.1957 |
| <i>L. ferrugineus</i> (Annandale, 1918)                                            | Myanmar: Salween Basin, fish pond near Demoso                  | RMBH: biv 404/1  | OL597815 | n/a      | n/a      | 19.7289 | 97.1167 |
| <i>L. ferrugineus</i> (Annandale, 1918)                                            | Myanmar: Salween Basin, fish pond near Demoso                  | RMBH: biv 404/2  | OL597816 | n/a      | n/a      | 19.7289 | 97.1167 |
| <i>L. ferrugineus</i> (Annandale, 1918)                                            | Myanmar: Salween Basin, fish pond near Demoso                  | RMBH: biv 404/3  | OL597817 | n/a      | n/a      | 19.7289 | 97.1167 |
| <i>L. ferrugineus</i> (Annandale, 1918)                                            | Myanmar: Salween Basin, Balu River near Loikaw                 | RMBH: biv 406A/1 | OL597818 | n/a      | n/a      | 19.6682 | 97.1848 |
| <i>L. ferrugineus</i> (Annandale, 1918)                                            | Myanmar: Salween Basin, Balu River near Loikaw                 | RMBH: biv 406A/2 | OL597819 | n/a      | n/a      | 19.6682 | 97.1848 |
| <i>L. ferrugineus</i> (Annandale, 1918)                                            | Myanmar: Salween Basin, Balu River near Loikaw                 | RMBH: biv 408A/1 | OL597820 | n/a      | n/a      | 19.6682 | 97.1848 |
| <i>L. ferrugineus</i> (Annandale, 1918)                                            | Myanmar: Salween Basin, Balu River near Loikaw                 | RMBH: biv 408A/2 | OL597821 | n/a      | n/a      | 19.6682 | 97.1848 |
| <i>L. mainwaringi</i> Preston, 1912                                                | Myanmar: Kaladan Basin, unnamed puddle                         | RMBH: biv 153    | KX230547 | KX230558 | KX230569 | 21.0079 | 92.9832 |
| <b>Parreysiini Henderson, 1935</b>                                                 |                                                                |                  |          |          |          |         |         |
| <b><i>Parreysia</i> Conrad, 1853</b>                                               |                                                                |                  |          |          |          |         |         |
| <i>Parreysia rakhinensis</i> Bolotov et al., 2020                                  | Myanmar: Kyeintali Stream, upStream of Odein village           | RMBH: biv 652/1  | MN275091 | MN307275 | MN307218 | 17.9193 | 94.5946 |
| <i>Parreysia rakhinensis</i> Bolotov et al., 2020                                  | Myanmar: Thandwe River, Ywar Shai village                      | RMBH: biv 656    | MN275104 | MN307276 | MN307219 | 18.3741 | 94.4952 |
| <i>Parreysia rakhinensis</i> Bolotov et al., 2020                                  | Myanmar: tributary of the Ann River                            | RMBH: biv 660/3  | MN275116 | MN307277 | MN307220 | 19.8035 | 94.0460 |
| <b>Leoparreysiini Vikhrev, Bolotov &amp; Kondakov, 2017</b>                        |                                                                |                  |          |          |          |         |         |
| <b><i>Leoparreysia</i> Vikhrev, Bolotov &amp; Aksenova in Bolotov et al., 2017</b> |                                                                |                  |          |          |          |         |         |
| <i>Leoparreysia olivacea</i> (Prashad, 1930)                                       | Myanmar: Ayeyarwady River, 3 mi SW Pakkoku, Magway Division    | UMMZ: 304641     | KP795022 | KP795044 | KP795005 | n/a     | n/a     |
| <i>L. olivacea</i> (Prashad, 1930)                                                 | Myanmar: Ayeyarwady River, Nant Kaung River                    | RMBH: biv 932/1  | OK480028 | n/a      | n/a      | 25.5361 | 96.7267 |
| <i>L. olivacea</i> (Prashad, 1930)                                                 | Myanmar: Ayeyarwady River, Nant Kaung River                    | RMBH: biv 932/2  | OK480029 | n/a      | n/a      | 25.5361 | 96.7267 |

|                                                      |                                                     |                 |          |          |          |         |         |
|------------------------------------------------------|-----------------------------------------------------|-----------------|----------|----------|----------|---------|---------|
| <i>L. olivacea</i> (Prashad, 1930)                   | Myanmar: Ayeyarwady River, Nant Kaung River         | RMBH: biv 932/3 | OK480030 | n/a      | n/a      | 25.5361 | 96.7267 |
| <i>L. canefrui</i> Vikhrev, Bolotov & Kondakov, 2017 | Myanmar: Sittaung River near Taungoo                | RMBH: biv 249   | MF352237 | MF352307 | MF352365 | 18.9840 | 96.4361 |
| <i>L. canefrui</i> Vikhrev, Bolotov & Kondakov, 2017 | Myanmar: Sittaung River near Taungoo                | RMBH: biv 252/1 | MF352245 | MF352315 | MF352373 | 18.9840 | 96.4361 |
| <i>L. canefrui</i> Vikhrev, Bolotov & Kondakov, 2017 | Myanmar: Sittaung River near Taungoo                | RMBH: biv 252/2 | MF352246 | MF352316 | MF352374 | 18.9840 | 96.4361 |
| <i>L. canefrui</i> Vikhrev, Bolotov & Kondakov, 2017 | Myanmar: Sittaung River near Taungoo                | RMBH: biv 252/3 | MF352247 | n/a      | n/a      | 18.9840 | 96.4361 |
| <i>L. canefrui</i> Vikhrev, Bolotov & Kondakov, 2017 | Myanmar: Sittaung River near Taungoo                | RMBH: biv 254/2 | MF352250 | MF352319 | MF352377 | 18.9840 | 96.4361 |
| <i>L. canefrui</i> Vikhrev, Bolotov & Kondakov, 2017 | Myanmar: Sittaung River near Taungoo                | RMBH: biv 254/4 | MF352251 | n/a      | n/a      | 18.9840 | 96.4361 |
| <i>L. canefrui</i> Vikhrev, Bolotov & Kondakov, 2017 | Myanmar: Sittaung River near Taungoo                | RMBH: biv 254/6 | MF352252 | n/a      | n/a      | 18.9840 | 96.4361 |
| <i>L. canefrui</i> Vikhrev, Bolotov & Kondakov, 2017 | Myanmar: Ayeyarwady Basin, Myit Tha (Manipur) River | RMBH: biv 340/1 | OL597825 | n/a      | OL598411 | 23.2285 | 94.1434 |
| <i>L. canefrui</i> Vikhrev, Bolotov & Kondakov, 2017 | Myanmar: Ayeyarwady Basin, Myit Tha (Manipur) River | RMBH: biv 340/3 | OL597826 | n/a      | n/a      | 23.2285 | 94.1434 |
| <i>L. canefrui</i> Vikhrev, Bolotov & Kondakov, 2017 | Myanmar: Ayeyarwady Basin, Myit Tha (Manipur) River | RMBH: biv 343   | OL597827 | n/a      | OL598412 | 23.2448 | 94.1662 |
| <i>L. canefrui</i> Vikhrev, Bolotov & Kondakov, 2017 | Myanmar: Ayeyarwady Basin, Chindwin River           | RMBH: biv 352   | OL597828 | n/a      | OL598413 | 23.1499 | 94.3629 |
| <i>L. canefrui</i> Vikhrev, Bolotov & Kondakov, 2017 | Myanmar: Bilin River near Daung Yet village         | RMBH: biv 374/1 | OL597829 | n/a      | n/a      | 17.2102 | 97.2488 |
| <i>L. canefrui</i> Vikhrev, Bolotov & Kondakov, 2017 | Myanmar: Bilin River near Daung Yet village         | RMBH: biv 374/2 | OL597830 | n/a      | n/a      | 17.2102 | 97.2488 |
| <i>L. canefrui</i> Vikhrev, Bolotov & Kondakov, 2017 | Myanmar: Bilin River near Daung Yet village         | RMBH: biv 374/3 | OL597831 | n/a      | n/a      | 17.2102 | 97.2488 |
| <i>L. canefrui</i> Vikhrev, Bolotov & Kondakov, 2017 | Myanmar: Bago River                                 | RMBH: biv 380/1 | OL597832 | n/a      | n/a      | 17.5334 | 96.3315 |
| <i>L. canefrui</i> Vikhrev, Bolotov & Kondakov, 2017 | Myanmar: Bago River                                 | RMBH: biv 380/2 | OL597833 | n/a      | n/a      | 17.5334 | 96.3315 |
| <i>L. canefrui</i> Vikhrev, Bolotov & Kondakov, 2017 | Myanmar: Bago River                                 | RMBH: biv 380/3 | OL597834 | n/a      | n/a      | 17.5334 | 96.3315 |
| <i>L. canefrui</i> Vikhrev, Bolotov & Kondakov, 2017 | Myanmar: Bago River                                 | RMBH: biv 391/1 | OL597835 | n/a      | n/a      | 17.6795 | 96.2347 |
| <i>L. canefrui</i> Vikhrev, Bolotov & Kondakov, 2017 | Myanmar: Bago River                                 | RMBH: biv 391/2 | OL597836 | n/a      | n/a      | 17.6795 | 96.2347 |
| <i>L. canefrui</i> Vikhrev, Bolotov & Kondakov, 2017 | Myanmar: Bago River                                 | RMBH: biv 391/3 | OL597837 | n/a      | n/a      | 17.6795 | 96.2347 |
| <i>L. canefrui</i> Vikhrev, Bolotov & Kondakov, 2017 | Myanmar: Ayeyarwady River near Tant Kyi village     | RMBH: biv 418/1 | OL597838 | n/a      | n/a      | 21.1567 | 94.8050 |
| <i>L. canefrui</i> Vikhrev, Bolotov & Kondakov, 2017 | Myanmar: Ayeyarwady River near Tant Kyi village     | RMBH: biv 418/2 | OL597839 | n/a      | OL598414 | 21.1567 | 94.8050 |
| <i>L. canefrui</i> Vikhrev, Bolotov & Kondakov, 2017 | Myanmar: Ayeyarwady River near Tant Kyi village     | RMBH: biv 418/3 | OL597840 | n/a      | n/a      | 21.1567 | 94.8050 |

|                                                      |                                                      |                 |          |          |          |         |         |
|------------------------------------------------------|------------------------------------------------------|-----------------|----------|----------|----------|---------|---------|
| <i>L. canefrii</i> Vikhrev, Bolotov & Kondakov, 2017 | Myanmar: Ayeyarwady River at Mandalay city           | RMBH: biv 431   | OL597841 | n/a      | n/a      | 21.9574 | 96.0510 |
| <i>L. canefrii</i> Vikhrev, Bolotov & Kondakov, 2017 | Myanmar: Ayeyarwady River at Mandalay city           | RMBH: biv 432/1 | OL597842 | n/a      | n/a      | 21.9574 | 96.0510 |
| <i>L. canefrii</i> Vikhrev, Bolotov & Kondakov, 2017 | Myanmar: Ayeyarwady River at Mandalay city           | RMBH: biv 432/2 | OL597843 | n/a      | n/a      | 21.9574 | 96.0510 |
| <i>L. canefrii</i> Vikhrev, Bolotov & Kondakov, 2017 | Myanmar: Ayeyarwady River at Mandalay city           | RMBH: biv 433/1 | OL597844 | n/a      | n/a      | 21.9574 | 96.0510 |
| <i>L. canefrii</i> Vikhrev, Bolotov & Kondakov, 2017 | Myanmar: Ayeyarwady River at Mandalay city           | RMBH: biv 433/2 | OL597845 | n/a      | n/a      | 21.9574 | 96.0510 |
| <i>L. canefrii</i> Vikhrev, Bolotov & Kondakov, 2017 | Myanmar: Ayeyarwady River at Mandalay city           | RMBH: biv 433/3 | OL597846 | n/a      | n/a      | 21.9574 | 96.0510 |
| <i>L. canefrii</i> Vikhrev, Bolotov & Kondakov, 2017 | Myanmar: Ayeyarwady River near Mandalay city         | RMBH: biv 444/1 | OL597847 | n/a      | n/a      | 21.8893 | 95.9978 |
| <i>L. canefrii</i> Vikhrev, Bolotov & Kondakov, 2017 | Myanmar: Ayeyarwady River near Mandalay city         | RMBH: biv 444/2 | OL597848 | n/a      | n/a      | 21.8893 | 95.9978 |
| <i>L. canefrii</i> Vikhrev, Bolotov & Kondakov, 2017 | Myanmar: Ayeyarwady River near Mandalay city         | RMBH: biv 444/3 | OL597849 | n/a      | n/a      | 21.8893 | 95.9978 |
| <i>L. canefrii</i> Vikhrev, Bolotov & Kondakov, 2017 | Myanmar: Ayeyarwady River near Mandalay city         | RMBH: biv 446/1 | OL597850 | n/a      | n/a      | 21.8893 | 95.9978 |
| <i>L. canefrii</i> Vikhrev, Bolotov & Kondakov, 2017 | Myanmar: Ayeyarwady River near Mandalay city         | RMBH: biv 446/2 | OL597851 | n/a      | n/a      | 21.8893 | 95.9978 |
| <i>L. canefrii</i> Vikhrev, Bolotov & Kondakov, 2017 | Myanmar: Ayeyarwady Basin, Mole Stream               | RMBH: biv 922/1 | OL597852 | OL598380 | n/a      | 24.4010 | 97.2544 |
| <i>L. canefrii</i> Vikhrev, Bolotov & Kondakov, 2017 | Myanmar: Ayeyarwady Basin, Mole Stream               | RMBH: biv 922/2 | OL597853 | n/a      | n/a      | 24.4010 | 97.2544 |
| <i>L. canefrii</i> Vikhrev, Bolotov & Kondakov, 2017 | Myanmar: Ayeyarwady Basin, Mole Stream               | RMBH: biv 922/3 | OL597854 | n/a      | n/a      | 24.4010 | 97.2544 |
| <i>L. canefrii</i> Vikhrev, Bolotov & Kondakov, 2017 | Myanmar: Ayeyarwady Basin, Nant Kaung River          | RMBH: biv 934/1 | OL597855 | n/a      | n/a      | 25.5361 | 96.7267 |
| <i>L. canefrii</i> Vikhrev, Bolotov & Kondakov, 2017 | Myanmar: Ayeyarwady Basin, Nant Kaung River          | RMBH: biv 934/2 | OL597856 | n/a      | n/a      | 25.5361 | 96.7267 |
| <i>L. canefrii</i> Vikhrev, Bolotov & Kondakov, 2017 | Myanmar: Ayeyarwady Basin, Nant Kaung River          | RMBH: biv 934/3 | OL597857 | n/a      | n/a      | 25.5361 | 96.7267 |
| <i>L. burmana</i> (Blanford, 1869)                   | Myanmar: Ayeyarwady River near Tha Phan Kone village | RMBH: biv 424/1 | MK372441 | n/a      | n/a      | 21.2566 | 94.9848 |
| <i>L. burmana</i> (Blanford, 1869)                   | Myanmar: Ayeyarwady River near Tha Phan Kone village | RMBH: biv 424/2 | MK372442 | MK372473 | MK372505 | 21.2566 | 94.9848 |
| <i>L. burmana</i> (Blanford, 1869)                   | Myanmar: Ayeyarwady River near Tha Phan Kone village | RMBH: biv 424/3 | MK372443 | MK372474 | MK372506 | 21.2566 | 94.9848 |
| <i>L. burmana</i> (Blanford, 1869)                   | Myanmar: Ayeyarwady River near Mandalay city         | RMBH: biv 443/3 | MK372447 | n/a      | n/a      | 21.8893 | 95.9978 |
| <i>L. burmana</i> (Blanford, 1869)                   | Myanmar: Ayeyarwady River near Mandalay city         | RMBH: biv 445/1 | MK372448 | n/a      | n/a      | 21.8893 | 95.9978 |
| <i>L. burmana</i> (Blanford, 1869)                   | Myanmar: Ayeyarwady River near Tant Kyi village      | RMBH: biv 419/2 | MK372437 | n/a      | n/a      | 21.1567 | 94.8050 |
| <i>L. burmana</i> (Blanford, 1869)                   | Myanmar: Ayeyarwady River near Tant Kyi village      | RMBH: biv 419/3 | MK372438 | MK372470 | MK372502 | 21.1567 | 94.8050 |

|                                                   |                                                      |                    |          |          |          |         |         |
|---------------------------------------------------|------------------------------------------------------|--------------------|----------|----------|----------|---------|---------|
| <i>L. burmana</i> (Blanford, 1869)                | Myanmar: Ayeyarwady Basin, Chindwin River            | RMBH: biv 350/1    | MK372412 | MK372460 | MK372490 | 23.1499 | 94.3629 |
| <i>L. burmana</i> (Blanford, 1869)                | Myanmar: Ayeyarwady Basin, Chindwin River            | RMBH: biv 350/2    | MK372413 | MK372461 | MK372491 | 23.1499 | 94.3629 |
| <i>L. tavoyensis</i> (Gould, 1843)                | Myanmar: Dawei River                                 | RMBH: biv 149      | KX230543 | KX230554 | KX230565 | 14.5013 | 98.1558 |
| <i>L. tavoyensis</i> (Gould, 1843)                | Myanmar: Ayeyarwady Basin, Lake Myaung               | RMBH: biv 266/4    | MF352280 | MF352343 | MF352400 | 24.2387 | 97.1658 |
| <i>L. tavoyensis</i> (Gould, 1843)                | Myanmar: Ayeyarwady Basin, Lake Myaung               | RMBH: biv 266/5    | MF352281 | MF352344 | MF352401 | 24.2387 | 97.1658 |
| <i>L. tavoyensis</i> (Gould, 1843)                | Myanmar: Ayeyarwady Basin, Lake Myaung               | RMBH: biv 266/6    | MF352282 | MF352345 | MF352402 | 24.2387 | 97.1658 |
| <i>L. tavoyensis</i> (Gould, 1843)                | Myanmar: Haungthayaw River                           | RMBH: biv 362/1    | MK372423 | n/a      | MK372499 | 16.4714 | 98.2183 |
| <i>L. tavoyensis</i> (Gould, 1843)                | Myanmar: Haungthayaw River                           | RMBH: biv 362/2    | MK372424 | n/a      | n/a      | 16.4714 | 98.2183 |
| <i>L. tavoyensis</i> (Gould, 1843)                | Myanmar: Haungthayaw River                           | RMBH: biv 362/3    | MK372425 | n/a      | n/a      | 16.4714 | 98.2183 |
| <i>L. tavoyensis</i> (Gould, 1843)                | Myanmar: Salween Basin, Mizan Stream                 | RMBH: biv 367/1    | OL597858 | n/a      | n/a      | 16.9770 | 97.6330 |
| <i>L. tavoyensis</i> (Gould, 1843)                | Myanmar: Salween Basin, Mizan Stream                 | RMBH: biv 367/2    | OL597859 | n/a      | OL598415 | 16.9770 | 97.6330 |
| <i>L. tavoyensis</i> (Gould, 1843)                | Myanmar: Salween Basin, Mizan Stream                 | RMBH: biv 367/3    | OL597860 | n/a      | n/a      | 16.9770 | 97.6330 |
| <i>L. tavoyensis</i> (Gould, 1843)                | Myanmar: Ayeyarwady River near Tha Phan Kone village | RMBH: biv 425/1    | OL597861 | n/a      | n/a      | 21.2566 | 94.9848 |
| <i>L. tavoyensis</i> (Gould, 1843)                | Myanmar: Ayeyarwady River near Tha Phan Kone village | RMBH: biv 425/3    | OL597862 | n/a      | OL598416 | 21.2566 | 94.9848 |
| <i>L. tavoyensis</i> (Gould, 1843)                | Myanmar: Ayeyarwady River near Mandalay city         | RMBH: biv 447/1    | OL597863 | n/a      | n/a      | 21.8893 | 95.9978 |
| <i>L. tavoyensis</i> (Gould, 1843)                | Myanmar: Ayeyarwady River near Mandalay city         | RMBH: biv 447/2    | OL597864 | n/a      | n/a      | 21.8893 | 95.9978 |
| <i>L. tavoyensis</i> (Gould, 1843)                | Myanmar: Tanintharyi River                           | RMBH: biv 634/1    | OL597865 | OL598381 | OL598417 | 12.2523 | 99.0402 |
| <i>L. tavoyensis</i> (Gould, 1843)                | Myanmar: Tanintharyi River                           | RMBH: biv 634/2    | OL597866 | OL598382 | OL598418 | 12.2523 | 99.0402 |
| <i>L. tavoyensis</i> (Gould, 1843)                | Myanmar: Tanintharyi River                           | RMBH: biv 634/3    | OL597867 | OL598383 | OL598419 | 12.2523 | 99.0402 |
| <i>L. tavoyensis</i> (Gould, 1843)                | Myanmar: Tanintharyi River                           | RMBH: biv 635/1    | OL597868 | n/a      | n/a      | 12.0914 | 99.0174 |
| <i>L. tavoyensis</i> (Gould, 1843)                | Myanmar: Tanintharyi River                           | RMBH: biv 635/2    | OL597869 | n/a      | n/a      | 12.0914 | 99.0174 |
| <i>L. tavoyensis</i> (Gould, 1843)                | Myanmar: Tanintharyi River                           | RMBH: biv 635/3    | OL597870 | n/a      | n/a      | 12.0914 | 99.0174 |
| <i>L. tavoyensis</i> (Gould, 1843)                | Myanmar: Tanintharyi Basin, Nga Wun River            | RMBH: biv 646/2    | OL597871 | n/a      | n/a      | 11.8233 | 99.1493 |
| <i>L. whitteni</i> Bolotov et al., 2019           | Myanmar: Ayeyarwady Basin, Chindwin River            | RMBH: biv 349      | MK372411 | MK372459 | MK372489 | 23.1918 | 94.3217 |
| <i>L. whitteni</i> Bolotov et al., 2019           | Myanmar: Ayeyarwady River                            | RMBH: biv 435      | MK372446 | MK372475 | MK372507 | 21.9574 | 96.0510 |
| <i>L. whitteni</i> Bolotov et al., 2019           | Myanmar: Ayeyarwady River                            | RMBH: biv 449      | MK372449 | MK372476 | MK372508 | 21.8893 | 95.9978 |
| <b>Outgroup Taxa</b>                              |                                                      |                    |          |          |          |         |         |
| <b>MARGARITIFERIDAE Henderson, 1929</b>           |                                                      |                    |          |          |          |         |         |
| <i>Gibbosula laosensis</i> (Lea, 1863)            | Laos: Mekong Basin, Nam Long River                   | IEPN-Mekong-La-1   | JX497731 | KC845943 | KT343741 |         |         |
| <i>Margaritifera dahurica</i> (Middendorff, 1850) | Far East of Russia: Amur Basin, Ilistaya River       | IEPN d0088/6       | KJ161516 | KJ943526 | KT343747 |         |         |
| <b>Gonideini s.s.</b>                             |                                                      |                    |          |          |          |         |         |
| <i>Solenais oleivora</i> (Heude, 1877) sp. 1      | China                                                | 16_NCU_XPW U_SU181 | MG463091 | n/a      | MG595618 |         |         |
| <i>Leguminaia wheatleyi</i> (Lea, 1862)           | Turkey: Karasu River                                 | RMBH: biv 177/7    | MN402614 | MN396725 | MN396721 |         |         |

|                                                    |                       |                  |          |          |          |  |  |
|----------------------------------------------------|-----------------------|------------------|----------|----------|----------|--|--|
| <i>Gonidea angulata</i> (Lea, 1838)                | Canada: Okanagan lake | RMBH: biv 294/1  | MN402615 | MN396726 | MN396722 |  |  |
| <b>Lamprotulini Modell, 1942</b>                   |                       |                  |          |          |          |  |  |
| <i>Lamprotula leaii</i> (Griffith & Pidgeon, 1833) | Vietnam               | RMBH: biv 200/1  | MN402616 | MN396727 | MN396723 |  |  |
| <i>Potomida littoralis</i> (Cuvier, 1798)          | Turkey: Karasu River  | RMBH: biv 177/10 | MN402617 | MN396728 | MN396724 |  |  |

**Table S2.** The best-fit models of nucleotide substitution and partition scheme.

| Tribe                  | Model used in ML analyses (IQ-TREE) |                         |                         | Model used in Bayesian analyses (MrBayes) |                         |                         |
|------------------------|-------------------------------------|-------------------------|-------------------------|-------------------------------------------|-------------------------|-------------------------|
|                        | 1st codon of <i>COI</i>             | 2nd codon of <i>COI</i> | 3rd codon of <i>COI</i> | 1st codon of <i>COI</i>                   | 2nd codon of <i>COI</i> | 3rd codon of <i>COI</i> |
| Indochinellini dataset | F81                                 | TIM3+ G                 | TN+G                    | The same models                           |                         |                         |
| Lamellidentini dataset | F81                                 | TN+G                    | TN+G                    | The same models                           |                         |                         |
| Leoparreiini dataset   | F81                                 | HKY                     | TN+G                    | The same models                           |                         |                         |
| Contradentini dataset  | F81+I                               | TIM3+G                  | TN+G                    | GTR + G                                   |                         |                         |

**Table S3.** Genetic divergences (mean uncorrected p-distances, %) from *Trapezoideus mitanensis* **sp. nov.** and its congeners based on the mitochondrial *COI* gene sequences.

| Species                              | <i>T. foliaceus</i> | <i>T. subviridus</i> | <i>T. lenya</i> |
|--------------------------------------|---------------------|----------------------|-----------------|
| <i>T. subviridus</i>                 | 6.3±0.9             |                      |                 |
| <i>T. lenya</i>                      | 4.6±0.7             | 5.9±0.9              |                 |
| <i>T. mitanensis</i> <b>sp. nov.</b> | 6.2±0.9             | 6.6±0.9              | 5.4±0.8         |

**Table S4.** Shell parameters (mm) and reference DNA sequences for the type series of *Trapezoideus mitanensis* **sp. nov.** from Myanmar.

| Status of Specimen | Specimen Voucher* | Shell Length, mm | Shell Height, mm | Shell Width, mm | NCBI's GenBank acc. nos. |                 |                 |
|--------------------|-------------------|------------------|------------------|-----------------|--------------------------|-----------------|-----------------|
|                    |                   |                  |                  |                 | <i>COI</i>               | <i>16S rRNA</i> | <i>28S rRNA</i> |
| Holotype           | RMBH biv 1021/1   | 37.1             | 20.8             | 12.3            | OL597613                 | ON142670        | ON171238        |
| Paratype           | RMBH biv 1021/2   | 32.6             | 19.7             | 10.8            | OL597614                 | OL598370        | OL598384        |
| Paratype           | RMBH biv 1021/3   | 38.8             | 20.7             | 12.0            | OL597615                 | n/a             | n/a             |
| Paratype           | RMBH biv 1021/4   | 33.8             | 18.8             | 10.9            | n/a                      | n/a             | n/a             |
| Paratype           | RMBH biv 1021/5   | 33.4             | 18.7             | 10.3            | n/a                      | n/a             | n/a             |
| Paratype           | RMBH biv 1021/6   | 30.7             | 17.1             | 9.9             | n/a                      | n/a             | n/a             |
| Paratype           | RMBH biv 1021/7   | 29.1             | 16.6             | 8.7             | n/a                      | n/a             | n/a             |
| Paratype           | RMBH biv 1021/8   | 29.8             | 16.0             | 9.1             | n/a                      | n/a             | n/a             |
| Paratype           | RMBH biv 1021/9   | 27.4             | 16.0             | 8.8             | n/a                      | n/a             | n/a             |
| Paratype           | RMBH biv 1021/10  | 27.1             | 15.9             | 8.6             | n/a                      | n/a             | n/a             |
| Paratype           | RMBH biv 1022/1   | 27.1             | 15.9             | 8.7             | OL597616                 | OL598371        | OL598385        |
| Paratype           | RMBH biv 1022/2   | 27.0             | 16.3             | 9.2             | OL597617                 | OL598372        | OL598386        |

**Alignment S1.** 3 codons of *COI* + *16S rRNA* + *28S rRNA* sequence alignment.

DNA, codon1 = 1-660\3

DNA, codon2 = 2-660\3

DNA, codon3 = 3-660\3

DNA, 16s = 661-1130

DNA, 28s = 1131-1896

**Alignment S2.** *COI* sequence alignment of Indochinellini from Myanmar.

**Alignment S3.** *COI* sequence alignment of Leoparreysiini from Myanmar.

**Alignment S4.** *COI* sequence alignment of Lamellidentini from Myanmar.

**Alignment S5.** *COI* sequence alignment of Contradentini from Myanmar.
