# Supplementary material for: Follow the Footsteps of Leonardo Fea: An Example of an Integrative Revision of Freshwater Mussel Taxa Described from the Former British Burma (Myanmar)
Source: Hindawi journal article supplement (doi:10.1155/2022/6600359), 2022-05-27
Supplement: f1 [file 6600359.f1.zip]

Archive with 15 entries (15 files):
- Alignment S1-Joint align.fasta
- Alignment S2.fasta
- Alignment S3.fasta
- Alignment S4.fasta
- Alignment S5.fasta
- Figure S1 (2).pdf
- Figure S2 (2).pdf
- Figure S3 (2).pdf
- Figure S4 (2).pdf
- Figure S5 (2).pdf
- Supplementary Material.pdf
- Table S1.docx
- Table S2.docx
- Table S3.docx
- Table S4.docx
