# Supplementary material for: Follow the Footsteps of Leonardo Fea: An Example of an Integrative Revision of Freshwater Mussel Taxa Described from the Former British Burma (Myanmar)
Source: Hindawi journal article supplement (doi:10.1155/2022/6600359), 2022-05-27
Supplement: f1 [file 6600359.f1.zip › Alignment S1-Joint align.fasta]

>JX497731_M_laosensis
GGACTTTGTATTTGTTGTTAGCTCTGTGGTCTGGGCTTATTGGGTTGGCTTTGAGATTGT
TAATTCGTGCTGAATTGGGTCAGCCTGGTAGGCTGTTGGGGGACGATCAATTGTATAATG
TTATTGTGACGGCACATGCTTTTATAATGATTTTCTTTTTGGTGATGCCTATGATAATTG
GTGGCTTTGGAAATTGGCTTATTCCCCTTATGATTGGGGCTCCTGATATGGCTTTCCCCC
GACTTAATAATTTGAGGTTTTGGTTACTTGTACCTGCTTTGTTTTTGTTGTTGAGTTCTT
CTTTAGTGGAGAGTGGTGTAGGTACAGGTTGGACTGTCTATCCACCTTTGTCAAGAAATG
TGTCTCATTCGGGGGCTTCTGTTGATTTAGCTATTTTTTCTTTGCATCTTGCGGGTGCTT
CTTCTATTCTTGGGGCCATTAATTTTATTTCGACTGTCGGTAATATGCGTTCACCTGGTG
TGGTTGCTGAGCGAATTCCTTTGTTTGTGTGGGCTGTTACCGTGACAGCTATTTTGTTAG
TGGCGGCGTTACCTGTTTTGGCGGGGGCTATTACTATGTTGTTGACTGATCGTAATTTGA
ACACGTCTTTTTTTGACCCTACCGGGGGGGGTGATCCCATTTTATACATGCATTTGTTTT
TCGTTTCCCGAAATGCATCAATGGGAAATAATGCCTGCCCAGTGAATTTTAACGGCCGCG
TTAGCGTGAGCGTGCTAAGGTAGCGTAATAAATAGCCTTTTAATTGGAGGCCAGTGAATG
GCAACACGGAAAACCATTGTATCATGAGTAAAACTTTATTTTTGGGTGAAAAAGCCCAAA
TAACGAGGAAGACAAAAAGACCCCGCGGAGCTTTACCTAATAAAGCCACAGATCAGTTAC
-GCTAATAGGTTTGGTTGGGGCAACCCTGGAACCTCCAAAACTTCCAGTTTAACAAAACC
TCATCTAAAACAC-CTCCGGACTAAAAAGAAGCTACCCCGGGGATAACAGCGTAATCCAA
CTCAAGAGTACGCATCGAAAGTTGGGTTTGCGACCTCGATGTTGGCTTAAGGTAATTCAC
ATAAGCGCAGCCGCTATGAGAGAATAGTCTGTTCGACTATTATACCCTTATAAGCGGAGG
AAAAGAAACTAACAAGGATTCCCCTAGTAACGGCGAGTGAAGCGGGAAAAGCCCAGCACC
GAATCCCACAGCCTGGCGCTGTCGGGAACTGTGGTGTATAGGTAGCGAACTTGTCGACGT
GTTCGGGTTCCCAAGTCCTCCTGATCGTGGCCTCTCCCATAGCGGGTGTCAGGCCCATTG
AGGCACCCGACGGCGTCGACTCGCAGCTACCTCGGAGTCGGGTTGTTTGGGAATGCAGCC
CAAAGGGGTGGTAAACTCCATCTAAGGCTAAATACTGCCACGAGTCCGATAGCGAACAAG
TACCGTGAGGGAAAGTTGAAAAGAACTTTGAAGAGAGAGTTCAAGAGTACGTGAAACCGC
TTAGAGGCAAACGGGTGGAACCGCA--GTGTCGACTCTTGGAATTCAACCTG----TCGG
GACGTGCTGGGATTGCGGAGCTCCAAAGCCCGTTTCTCGGCGTGGTCTCCGGTCGGTCTG
GTGCACTTTCTTCGAGTCGAGAGCCACGACCGGCTCTTTGCGGCCAGAAGCCT-TTGCTG
GGAAGGTGACC-TCGGCTGCGGAGTTATAGCCCAGCTTG--CGTT-GGCTCGTCGGAGGG
CCGAGGTTGCCGCGACTCGTCGCTCTCGCCATCTGCGCTCGTCACGACTGGGGTGGACTG
CTC-GCCAGTGCTCTCCCGACCGCGAGCGT-GGAAGGGTCCGTTCGGCGTGAGTTGCTTC
GGGCCCGTGGCGAATCGGTCGGTCACCCNNNNNNNN
>KJ161516_M_daurica
GGACTTTGTATTTATTGTTGGCTCTATGGTCTGGTCTTATTGGTTTGGCTTTGAGGTTAT
TGATTCGTGCTGAGTTGGGTCAACCCGGTAGTTTGTTGGGGGATGATCAGTTGTACAATG
TTATTGTTACGGCCCATGCTTTTATAATAATTTTCTTTTTGGTTATGCCAATAATAATTG
GTGGTTTTGGTAATTGGCTTATTCCGCTTATGATTGGGGCTCCCGATATGGCTTTTCCTC
GGCTTAATAATTTGAGGTTTTGGCTACTTGTGCCGGCTCTTTTTCTGTTACTGAGCTCTT
CTTTAGTGGAGAGTGGTGTTGGTACTGGGTGGACTGTTTATCCACCTTTGTCAAGGAATG
TTTCTCATTCTGGGGCTTCTGTAGATTTGGCTATTTTTTCTTTACATCTTGCCGGTGCGT
CTTCTATTTTGGGGGCTATTAATTTTATTTCTACTGTTGGTAATATACGCTCTCCGGGTG
TGGTTGCTGAGCGGATTCCTTTGTTTGTGTGAGCTGTCACCGTGACAGCTGTTTTGTTAG
TGGCGGCACTGCCAGTTTTGGCAGGGGCTATTACTATACTATTAACTGACCGTAATTTAA
ATACATCTTTTTTTGACCCGACGGGTGGAGGTGATCCCATTTTGTATATGCACTTGTTTT
TCGTTTCCCGAAAACCA-AAATGGGAAATAATGCCTGCCCAGTGAATTTTAACGGCCGCG
TTAGCGTGAGCGTGCTAAGGTAGCGTAATAATTAGCCTTTTAATTGGAGGCCAGTGAATG
GCAACACGGAAAACCCCTGTATCACGAATAAAATTTTATTTTTGGGTGAAAAAGCCCAAA
TAATGAGGAAGACAAAAAGACCCCGCGGAGCTTTACTTTATCAAGCTATCAGATCAGTTA
TGCTAGTAAGTTTGGTTGGGGCAACCCTGGAACCACTAAAGCTTCCAGTAAAATAGAATT
TCATCAAAAACAT-CTTCGGACTAAAAAGAAGCTACCCCGGGGATAACAGCGTAATCCAA
CTTAAGAGTACGCATCGAAAGTTGGGTTTGCGACCTCGATGTTGGCTTAAGGTAATTCAC
ATGAGCGCAGCCGCTATGAGAGAATAGTCTGTTCGACTATTATACCCTTATAAGCGGAGG
AAAAGAAACTAACAAGGATTCCCCTAGTAACGGCGAGTGAAGCGGGAAAAGCCCAGCACC
GAATCCCACAGCCTTGCGCTGTCGGGAACTGTGGTGTATAGGTAGCCTACTTGTCGACGT
GTTCGGGTTCCCAAGTCCTCCTGATCGTGGCCTCTCCCATAGCGGGTGTCAGGCCCATTG
AGGCACCCGACGGCGTCGACTCGCAGCTACCTCGGAGTCGGGTTGT-TGGGAATGCAGCC
CAAAGGGGTGGTAAACTCCATCTAAGGCTAAATACTGCCACGAGTCCGATAGCGAACAAG
TACCGTGAGGGAAAGTTGAAAAGAACTTTGAAGAGAGAGTTCAAGAGTACGTGAAACCGC
TTAGAGGCAAACGGGTGGAACCGCA--GTGTCGACTCTTGGAATTCAACCTG----TCGG
GACGTGCTGGAATTGCGGAGCTCCAAAGCCCGTTTCTCGGCGTGGTCTCCGGTCGGTCTG
GTGCACTTTCTTCGAGTCGAGAGCCACGACCGGCTCTTTGCGGCCAGAAGCCTG--GCTG
GGAAGGTGACC-TCGGCTGCGGAGTTATAGCCCAGCTTG--CGTT-GGCTCGTCGGAGGG
CCGAGGTTGCCGCGACTCGTCGCTCTCGCCATCTGCGCTCGTCACGACTGGGGTGAACTG
CTT-GCCAGTGCTCTCCCGACCGCGAGCGT-GGAAGGGTTCGTTCGGCGTGAGTTGCTTC
CGGCCTGTGGCGACTCAGTCGGTCACCCACCCGACC
>618_3_P_kayinensis
GTACGTTGTATTTATTGTTGGCTTTGTGATCTGGGTTGATTGGGTTGGCTTTAAGGCTTT
TGATCCGAGCGGAGTTGGGGCAACCTGGAAGACTGTTGGGTGACGATCAACTTTATAATG
TAATTGTTACAGCTCATGCTTTTATAATGATTTTCTTTTTGGTGATGCCTATGATAATCG
GTGGTTTTGGTAATTGGCTTATCCCCCTTATGGTTGGGGCTCCTGATATGGCTTTTCCTC
GGCTTAATAATTTGAGGTTTTGGTTGCTTGTACCAGCTCTTTTTTTATTGCTGAGGTCTT
CTTTAGTGGAAAGTGGGGTTGGGACAGGTTGGACTGTGTATCCGCCGTTGTCTGGGAATG
TGGCTCATTCAGGGGCTTCAGTTGATTTGGCTATTTTTTCTTTGCATCTCGCTGGTGCTT
CTTCTATTTTGGGGGCCATTAATTTTATTTCTACGGTTGGAAACATGCGGTCTCCTGGGG
TAGTTGCTGAACGAATTCCTTTATTTGTGTGGGCTGTGACAGTAACAGCGGTTTTGTTAG
TTGCGGCTTTGCCCGTGTTGGCTGGTGCCATTACTATGTTGCTTACCGATCGTAATTTGA
ATACATCGTTTTTTGACCCGACTGGAGGGGGGGACCCGATTTTGTATATACATTTGTTTT
TCGTCCCCTGACA-TTA-CGATAGGGGATAATGCCTGCCCAGTGAATTTAAACGGCCGCG
TTAGCGTGAGCGTGCTAAGGTAGCGTAATAAATAGCCTCTTAATTGGAGGCCAGTGAAAG
GCAAGACTAAGAACACCTATACCTCCAAAAGAACTTTTCGTCTGAGTGAAAAGCCTCAGA
TAATAAGGAAGACGAAAAGACCCCGCGGAGCTTTACTTTTTCTCCGCATATAAATAAAAC
TGCAACAA-GTTTGATTGGGGCAATCTCGGAACC-CACAAGCTTCCGA-CATTTAGAAAC
ACATAAAAAATTCATTATGGACAAGACAGAAGCTACCCCGGGGATAACAGCGTCATCCAA
CTTGAGAGTACACATCGAAAGTTGGGTTTGCGACCTCGATGTTGGCTTAAGGATTTCCGC
ATAAGTGCAGCCGCTATG-CAGGACAGTCTGTTCGACTATTATACCCTTATAAGCGGAGG
AAAAGAAACTAACAAGGATTCCCCCAGTAACGGCGAGTGAAGAGGGAAAAGCCCAGCACC
GAATCCCACAGCCTTGCGCTGTCGGGAACTGTGGTGTATAGGAAGCCTACTTGTCGTCGT
GTTCGGGTACCCAAGTCCTCCTGATCGTGGCCTCTCCCATAGCGGGTGTCAGGCCCATAG
AGGCACCCGACGGCGTCGGCTTGGAGCTTCCTCGGAGTCGGGTTGTTTGGGAATGCAGCC
CAAAGGGGTGGTAAACTCCATCTAAGGCTAAATACTGCCACGAGTCCGATAGCAAACAAG
TACCGTGAGGGAAAGTTGAAAAGAACTTTGAAGAGAGAGTTCAAGAGTACGTGAAACCGC
TTAGAGGCAAACGGGTGGACCCGCAATGTGTCGACTCGGGGGATTCAACCAGTGCGTCGG
GACGCGCTGGGGATGCGGAGCCGTAAAGCCCGTGCCTTGGCGTGGTCTCCGGGCGGACTG
GTGCACTTTCCTCGGGTCGATGGCCACGACCGGCTCTCCGCGGCCATAAGCCTGCTGCTG
GTAAGGTGACCCCGCGCCGTGGTGTTATAGACCAGCTTGTCCGTTGTGCTCGTCGGAGGG
CCGAGGTTGCCGCGTCTCGTCACCCTCGCCATCCTTGCTCGTCACGACTGGGGCGGACTG
GTCGGTCAGTGCTCTCCCGACCGCGAGCGTAGGAAGGGCTGGTACGGTGTGGGATGCTTC
GGGCCAGTGGCGAATCGGTCGGTCCTCCACCCGACC
>637_1_P_kayinensis
GTACGTTGTATTTATTGTTGGCTTTGTGATCTGGGTTGATTGGGTTGGCTTTAAGGCTTT
TGATCCGAGCGGAGTTGGGGCAACCTGGAAGACTGTTGGGTGACGATCAACTTTATAATG
TAATTGTTACAGCTCATGCTTTTATAATGATTTTCTTTTTGGTGATGCCTATGATAATCG
GTGGTTTTGGTAATTGGCTTATCCCTCTTATGGTTGGGGCTCCTGATATGGCTTTTCCTC
GGCTTAATAATTTGAGGTTTTGGTTGCTTGTACCAGCTCTTTTTTTATTGCTGAGGTCTT
CTTTAGTGGAAAGTGGGGTTGGGACAGGTTGGACTGTGTATCCGCCGTTGTCTGGGAATG
TGGCTCATTCAGGGGCTTCAGTTGATTTGGCTATTTTTTCTTTGCATCTCGCTGGTGCTT
CTTCTATTTTGGGGGCCATTAATTTTATTTCTACGGTTGGAAACATGCGGTCTCCTGGGG
TAGTTGCTGAACGAATTCCTTTATTTGTGTGGGCTGTGACAGTAACAGCGGTTTTGTTAG
TTGCGGCTTTGCCCGTGTTGGCTGGTGCCATTACTATGTTGCTTACCGATCGTAATTTGA
ATACATCGTTTTTTGACCCGACTGGAGGGGGGGACCCGATTTTGTATATACATTTGTTTT
TCGTCCCCTGACA-TTA-CGATAGGGGATAATGCCTGCCCAGTGAATTTAAACGGCCGCG
TTAGCGTGAGCGTGCTAAGGTAGCGTAATAAATAGCCTCTTAATTGGAGGCCAGTGAAGG
GCAAGACTAAGAACACCTATACCTCCAAAAGAACTTTTCGTCTGAGTGAAAAGCCTCAGA
TAATAAGGAAGACGAAAAGACCCCGCGGAGCTTTACTTTTTCTCCGCATATAAATAAAAC
TGCAACAA-GTTTGATTGGGGCAATCTCGGAACC-CACAAGCTTCCGA-CATTTAGAAAC
ACATAAAAAATTCATTATGGACAAGACAGAAGCTACCCCGGGGATAACAGCGTCATCCAA
CTTGAGAGTACACATCGAAAGTTGGGTTTGCGACCTCGATGTTGGCTTAAGGATTTCCGC
ATAAGTGCAGCCGCTATG-CAGGACAGTCTGTTCGACTATTATACCCTTATAAGCGGAGG
AAAAGAAACTAACAAGGATTCCCCCAGTAACGGCGAGTGAAGAGGGAAAAGCCCAGCACC
GAATCCCACAGCCTTGCGCTGTCGGGAACTGTGGTGTATAGGAAGCCTACTTGTCGTCGT
GTTCGGGTACCCAAGTCCTCCTGATCGTGGCCTCTCCCATAGCGGGTGTCAGGCCCATAG
AGGCACCCGACGGCGTCGGCTTGGAGCTTCCTCGGAGTCGGGTTGTTTGGGAATGCAGCC
CAAAGGGGTGGTAAACTCCATCTAAGGCTAAATACTGCCACGAGTCCGATAGCAAACAAG
TACCGTGAGGGAAAGTTGAAAAGAACTTTGAAGAGAGAGTTCAAGAGTACGTGAAACCGC
TTAGAGGCAAACGGGTGGACCCGCAATGTGTCGACTCGGGGGATTCAACCAGTGCGTCGG
GACGCGCCGGGGATGCGGAGCCGTAAAGCCCGTGCCTTGGCGTGGTCTCCGGGCGGACTG
GTGCACTTTCCTCGGGTCGATGGCCACGACCGGCTCTCCGCGGCCATAAGCCTGCTGCTG
GTAAGGTGACCCCGCGCCGTGGTGTTATAGACCAGCTTGTCCGTTGTGCTCGTCGGAGGG
CCGAGGTTGCCGCGTCTCGTCACCCTCGCCATCCTTGCTCGTCACGACTGGGGCGGACTG
GTCGGTCAGTGCTCTCCCGACCGCGAGCGTAGGAAGGGCTGGTACGGTGTGGGATGCTTC
GGGCCAGTGGCGAATCGGTCGGTCCTCCACCCGACC
>638_1_P_kayinensis
GTACGTTGTATTTATTGTTGGCTTTGTGATCTGGGTTGATTGGGTTGGCTTTAAGACTTT
TGATCCGAGCGGAGTTGGGGCAACCTGGAAGACTGTTGGGTGACGATCAACTTTATAATG
TAATTGTTACAGCTCATGCTTTTATAATGATTTTCTTTTTGGTGATGCCTATGATAATCG
GTGGTTTTGGTAATTGGCTTATCCCCCTTATGGTTGGGGCTCCTGATATGGCTTTTCCTC
GGCTTAATAATTTGAGGTTTTGGTTGCTTGTACCAGCTCTTTTTTTATTGCTGAGGTCTT
CTTTAGTGGAAAGTGGGGTTGGGACAGGTTGGACTGTGTATCCGCCGTTGTCTGGGAATG
TGGCTCATTCAGGGGCTTCAGTTGATTTGGCTATTTTTTCTTTGCATCTTGCTGGTGCTT
CTTCTATTTTGGGGGCCATTAATTTTATTTCTACGGTTGGAAACATGCGGTCTCCTGGGG
TAGTTGCTGAACGAATTCCTTTATTTGTGTGGGCTGTGACAGTAACAGCGGTTTTGTTAG
TTGCGGCTTTGCCAGTGTTGGCTGGTGCCATTACTATGTTGCTTACCGATCGTAATTTGA
ATACATCGTTTTTTGACCCAACTGGAGGGGGGGACCCGATTTTGTATATACATTTGTTTT
TCGTCCCCTGACA-TTA-CGATAGGGGATAATGCCTGCCCAGTGAATTTAAACGGCCGCG
TTAGCGTGAGCGTGCTAAGGTAGCGTAATAAATAGCCTCTTAATTGGAGGCCAGTGAAAG
GCAAGACTAAGAACACCTATACCTCCAAAAGAACTTTTCGTCTGAGTGAAAAGCCTCAGA
TAATAAGGAAGACGAAAAGACCCCGCGGAGCTTTACTTTTTCTCCGCATATAAATAAAAC
TGCAACAA-GTTTGATTGGGGCAATCTCGGAACC-CACAAGCTTCCGA-CATTTAGAAAC
ACATAAAAAATTCATTATGGACAAGACAGAAGCTACCCCGGGGATAACAGCGTCATCCAA
CTTGAGAGTACACATCGAAAGTTGGGTTTGCGACCTCGATGTTGGCTTAAGGATTTCCGC
ATAAGTGCAGCCGCTATG-CAGGACAGTCTGTTCGACTATTATACCCTTATAAGCGGAGG
AAAAGAAACTAACAAGGATTCCCCCAGTAACGGCGAGTGAAGAGGGAAAAGCCCAGCACC
GAATCCCACAGCCTTGCGCTGTCGGGAACTGTGGTGTATAGGAAGCCTACTTGTCGTCGT
GTTCGGGTACCCAAGTCCTCCTGATCGTGGCCTCTCCCATAGCGGGTGTCAGGCCCATAG
AGGCACCCGACGGCGTCGGCTTGGAGCTTCCTCGGAGTCGGGTTGTTTGGGAATGCAGCC
CAAAGGGGTGGTAAACTCCATCTAAGGCTAAATACTGCCACGAGTCCGATAGCAAACAAG
TACCGTGAGGGAAAGTTGAAAAGAACTTTGAAGAGAGAGTTCAAGAGTACGTGAAACCGC
TTAGAGGCAAACGGGTGGACCCGCAATGTGTCGACTCGGGGGATTCAACCAGTGCGTCGG
GACGCGCCGGGGATGCGGAGCCGTAAAGCCCGTGCCTTGGCGTGGTCTCCGGGCGGACTG
GTGCACTTTCCTCGGGTCGATGGCCACGACCGGCTCTCCGCGGCCATAAGCCTGCTGCTG
GTAAGGTGACCCCGCGCCGTGGTGTTATAGACCAGCTTGTCCGTTGTGCTCGTCGGAGGG
CCGAGGTTGCCGCGTCTCGTCACCCTCGCCATCCTTGCTCGTCACGACTGGGGCGGACTG
GTCGGTCAGTGCTCTCCCGACCGCGAGCGTAGGAAGGGCTGGTACGGTGTGGGATGCTTC
GGGCCAGTGGCGAATCGGTCGGTCCTCCACCCGACC
>110_5_P_avae
GTACGTTGTATTTGTTGTTGGCGTTATGGTCTGGGTTGATTGGGTTGGCTTTGAGGCTTT
TAATTCGGGCAGAGTTGGGGCAGCCTGGGAGATTGTTGGGGGATGATCAGCTTTATAATG
TAATTGTTACGGCTCATGCTTTTATAATGATTTTCTTTTTGGTAATGCCTATGATAATTG
GTGGTTTTGGTAATTGGCTTATTCCTCTTATGATTGGGGCTCCAGATATGGCTTTCCCTC
GGCTTAATAATTTGAGGTTTTGGTTACTTGTGCCAGCTCTTTTTTTGCTATTAAGATCCT
CTTTGGTAGAGAGAGGGGTTGGGACTGGTTGGACTGTTTATCCTCCTCTGTCTGGGAATG
TGGCTCATTCGGGGGCTTCTGTTGATTTGGCTATTTTTTCTTTGCACCTTGCTGGTGCTT
CTTCTATTTTGGGGGCTATTAATTTTATTTCTACGGTTGGAAATATACGATCTCCTGGGG
TGATTGCTGAGCGAATCCCCTTGTTTGTATGGGCTGTAACGGTGACAGCGGTTTTATTGG
TTGCAGCTTTGCCTGTGTTGGCAGGTGCTATTACCATGTTGCTTACTGATCGTAATTTAA
ATACGTCGTTTTTTGATCCTACAGGAGGGGGGGACCCAATTTTGTATATGCATTTGTTTT
TCGTCTTCTGACA-CCA-CTATAGAGGATAATGCCTGCCCAGTGAACTTAAACGGCCGCG
TTAGCGTGAGCGTGCTAAGGTAGCGTAATAAATAGCCTCTTAATTGGAGGCCAGTGAAAG
GCAACACTAAGAACACCTATACCTTCAAAAAAACTTTTCGTCTGAGTGAAAAGCCTCAGA
TAATAAGGAAGACGAAAAGACCCCGCGGAGCTTTACTTTTTCTTCGCAAATAAGCAAAAC
TGCAACAA-GTTTGATTGGGGCAATCTCGGAACC-ACCAAGCTTCCGA-CATTAAGAAAC
CTATTAAAAACTTATTATGGACAAGACAGAAGCTACCCCGGGGATAACAGCGTCATCCAA
CTTGAGAGTACACATCGAAAGTTGGGTTTGCGACCTCGATGTTGGCTTAAGGATTTCCGC
ATAAGTGCAGCCGCTATG-CAGGACAGTCTGTTCGACTATTATACCCTTATAAGCGGAGG
AAAAGAAACTAACAAGGATTCCCCTAGTAACGGCGAGTGAAGAGGGAAAAGCCCAGCACC
GAATCCCACAGCCTTGCGCTGTCGGGAACTGTGGTGTATAGGAAGCCTACTTGTCGTCGT
GTTCGGGTACCCAAGTCCTCCTGATCGTGGCCTCTCCCATAGCGGGTGTCAGGCCCATAG
AGGCACCCGACGGCGTCGGCTTGGAGCTTCCTCGGAGTCGGGTTGTTTGGGAATGCAGCC
CAAAGGGGTGGTAAACTCCATCTAAGGCTAAATACTGCCACGAGTCCGATAGCAAACAAG
TACCGTGAGGGAAAGTTGAAAAGAACTTTGAAGAGAGAGTTCAAGAGTACGTGAAACCGC
TTAGAGGCAAACGGGTGGACCCGCAATGTGTCGACTCGGGGGATTCAACCAGTGCGTCGG
GACGCGCTGAGGATGCGGAGCCGTAAAGCCCGTGCCTTGGCGTGGTCTCCGGGCGGACTG
GTGCACTTTCCTCGGGTCGATGGCCACGACCGGCTCTCCGCGGCCATAAGCCTGCTGCTG
GTAAGGTGACCCCGCGCCGTGGTGTTATAGACCAGCTTGTCCGTTGTGCTCGTCGGAGGG
CCGAGGTTGCCGCGTCTCATCACCCTCGCCATCCTTGCTCGTCACGACTGGGGCGGACTG
GTCGGTCAGTGCTCTCCCGACCGCGAGCGTAGGAAGGGCTGGTACGGTGTGGGANNNNNN
NNNNNNNNNNNNNNNNNNNNNNNNNNNNNNNNNNNN
>110_10_P_avae
GTACGTTGTATTTGTTGTTGGCGTTATGGTCTGGGTTGATTGGGTTGGCTTTGAGGCTTT
TAATTCGGGCAGAGTTGGGGCAGCCTGGGAGATTGTTGGGGGATGATCAGCTTTATAATG
TAATTGTTACGGCTCATGCTTTTATAATGATTTTCTTTTTGGTAATGCCTATGATAATTG
GTGGTTTTGGTAATTGGCTTATTCCTCTTATGATTGGGGCTCCAGATATGGCTTTCCCTC
GGCTTAATAATTTGAGGTTTTGGTTACTTGTGCCAGCTCTTTTTTTGCTATTAAGATCCT
CTTTGGTAGAGAGAGGGGTTGGGACTGGTTGGACTGTTTATCCTCCTCTGTCTGGGAATG
TGGCTCATTCGGGGGCTTCTGTTGATTTGGCTATTTTTTCTTTGCACCTTGCTGGTGCTT
CTTCTATTTTGGGGGCTATTAATTTTATTTCTACGGTTGGAAATATACGATCTCCTGGGG
TGATTGCTGAGCGAATCCCCTTGTTTGTATGGGCTGTAACGGTGACAGCGGTTTTATTGG
TTGCAGCTTTGCCTGTGTTGGCAGGTGCTATTACCATGTTGCTTACTGATCGTAATTTAA
ATACGTCGTTTTTTGATCCTACAGGAGGGGGGGACCCAATTTTGTATATGCATTTGTTTT
TCGTCTTCTGACA-CCA-CTATAGAGGATAATGCCTGCCCAGTGAACTTAAACGGCCGCG
TTAGCGTGAGCGTGCTAAGGTAGCGTAATAAATAGCCTCTTAATTGGAGGCCAGTGAAAG
GCAACACTAAGAACACCTATACCTTCAAAAAAACTTTTCGTCTGAGTGAAAAGCCTCAGA
TAATAAGGAAGACGAAAAGACCCCGCGGAGCTTTACTTTTTCTTCGCAAATAAGCAAAAC
TGCAACAA-GTTTGATTGGGGCAATCTCGGAACC-ACCAAGCTTCCGA-CATTAAGAAAC
CTATTAAAAACTTATTATGGACAAGACAGAAGCTACCCCGGGGATAACAGCGTCATCCAA
CTTGAGAGTACACATCGAAAGTTGGGTTTGCGACCTCGATGTTGGCTTAAGGATTTCCGC
ATAAGTGCAGCCGCTATG-CAGGACAGTCTGTTCGACTATTATACCCTTATAAGCGGAGG
AAAAGAAACTAACAAGGATTCCCCTAGTAACGGCGAGTGAAGAGGGAAAAGCCCAGCACC
GAATCCCACAGCCTTGCGCTGTCGGGAACTGTGGTGTATAGGAAGCCTACTTGTCGTCGT
GTTCGGGTACCCAAGTCCTCCTGATCGTGGCCTCTCCCATAGCGGGTGTCAGGCCCATAG
AGGCACCCGACGGCGTCGGCTTGGAGCTTCCTCGGAGTCGGGTTGTTTGGGAATGCAGCC
CAAAGGGGTGGTAAACTCCATCTAAGGCTAAATACTGCCACGAGTCCGATAGCAAACAAG
TACCGTGAGGGAAAGTTGAAAAGAACTTTGAAGAGAGAGTTCAAGAGTACGTGAAACCGC
TTAGAGGCAAACGGGTGGACCCGCAATGTGTCGACTCGGGGGATTCAACCAGTGCGTCGG
GACGCGCTGGGGATGCGGAGCCGTAAAGCCCGTGCCTTGGCGTGGTCTCCGGGCGGACTG
GTGCACTTTCCTCGGGTCGATGGCCACGACCGGCTCTCCGCGGCCATAAGCCTGCTGCTG
GTAAGGTGACCCCGCGCCGTGGTGTTATAGACCAGCTTGTCCGTTGTGCTCGTCGGAGGG
CCGAGGTTGCCGCGTCTCGTCACCCTCGCCATCCTTGCTCGTCACGACTGGGGCGGACTG
GTCGGTCAGTGCTCTCCCGACCGCGAGCGTAGGAAGGGCTGGTACGGTGTGGGANNNNNN
NNNNNNNNNNNNNNNNNNNNNNNNNNNNNNNNNNNN
>110_11_P_avae
GTACGTTGTATTTGTTGTTGGCATTATGGTCTGGGTTGATTGGGTTGGCTTTGAGGCTTT
TAATTCGGGCAGAGTTGGGGCAGCCTGGGAGATTGTTGGGGGATGATCAGCTTTATAATG
TAATTGTTACGGCTCATGCTTTTATAATGATTTTCTTTTTGGTAATGCCTATGATAATTG
GTGGTTTTGGTAATTGGCTTATTCCTCTTATGATTGGGGCTCCAGATATGGCTTTCCCTC
GGCTTAATAATTTGAGGTTTTGGTTACTTGTGCCAGCTCTTTTTTTGCTATTAAGATCCT
CTTTGGTAGAGAGAGGGGTTGGGACTGGTTGGACTGTTTATCCTCCTCTGTCTGGGAATG
TGGCTCATTCGGGGGCTTCTGTTGATTTGGCTATTTTTTCTTTGCACCTTGCTGGTGCTT
CTTCTATTTTGGGGGCTATTAATTTTATTTCTACGGTTGGAAATATACGATCTCCTGGGG
TGATTGCTGAGCGAATCCCCTTGTTTGTATGGGCTGTAACGGTGACAGCGGTTTTATTGG
TTGCAGCTTTGCCTGTGTTGGCAGGTGCTATTACCATGTTGCTTACTGATCGTAATTTAA
ATACGTCGTTTTTTGACCCTACAGGAGGGGGGGACCCAATTTTGTATATGCATTTGTTTT
TCGTCTTCTGACA-CCA-CTATAGAGGATAATGCCTGCCCAGTGAACTTAAACGGCCGCG
TTAGCGTGAGCGTGCTAAGGTAGCGTAATAAATAGCCTCTTAATTGGAGGCCAGTGAAAG
GCAACACTAAGAACACCTATACCTTCAAAAAAACTTTTCGTCTGAGTGAAAAGCCTCAGA
TAATAAGGAAGACGAAAAGACCCCGCGGAGCTTTACTTTTTCTTCGCAAATAAGCAAAAC
TGCAACAA-GTTTGATTGGGGCAATCTCGGAACC-ACCAAGCTTCCGA-CATTAAGAAAC
CTATTAAAAACTTATTATGGACAAGACAGAAGCTACCCCGGGGATAACAGCGTCATCCAA
CTTGAGAGTACACATCGAAAGTTGGGTTTGCGACCTCGATGTTGGCTTAAGGATTTCCGC
ATAAGTGCAGCCGCTATG-CAGGACAGTCTGTTCGACTATTATACCCTTATAAGCGGAGG
AAAAGAAACTAACAAGGATTCCCCTAGTAACGGCGAGTGAAGAGGGAAAAGCCCAGCACC
GAATCCCACAGCCTTGCGCTGTCGGGAACTGTGGTGTATAGGAAGCCTACTTGTCGTCGT
GTTCGGGTACCCAAGTCCTCCTGATCGTGGCCTCTCCCATAGCGGGTGTCAGGCCCATAG
AGGCACCCGACGGCGTCGGCTTGGAGCTTCCTCGGAGTCGGGTTGTTTGGGAATGCAGCC
CAAAGGGGTGGTAAACTCCATCTAAGGCTAAATACTGCCACGAGTCCGATAGCAAACAAG
TACCGTGAGGGAAAGTTGAAAAGAACTTTGAAGAGAGAGTTCAAGAGTACGTGAAACCGC
TTAGAGGCAAACGGGTGGACCCGCAATGTGTCGACTCGGGGGATTCAACCAGTGCGTCGG
GACGCGCTGGGGATGCGGAGCCGTAAAGCCCGTGCCTTGGCGTGGTCTCCGGGCGGACTG
GTGCACTTTCCTCGGGTCGATGGCCACGACCGGCTCTCCGCGGCCATAAGCCTGCTGCTG
GTAAGGTGACCCCGCGCCGTGGTGTTATAGACCAGCTTGTCTGTTGTGCTCGTCGGAGGG
CCGAGGTTGCCGCGTCTCGTCACCCTCGCCATCCTTGCTCGTCACGACTGGGGCGGACTG
GTCGGTCAGTGCTCTCCCGACCGCGAGCGTAGGAAGGGCTGGTACGGTGTGGGANNNNNN
NNNNNNNNNNNNNNNNNNNNNNNNNNNNNNNNNNNN
>241_4_P_bogani
GTACTTTGTATTTGTTGTTGGCGTTATGGTCTGGGCTAATTGGGTTGGCTTTGAGTCTTT
TAATTCGGGCTGAGTTAGGGCAGCCTGGAAGACTGTTGGGGGATGACCAGCTTTATAATG
TAATTGTTACGGCTCATGCTTTTATGATAATTTTCTTTTTGGTGATGCCTATGATAATTG
GTGGTTTTGGTAATTGACTTATTCCCCTTATAATTGGGGCTCCAGATATGGCTTTTCCCC
GGCTTAATAACTTAAGGTTTTGGTTACTTGTGCCAGCTCTTTTTTTATTGTTAAGATCTT
CTTTAGTGGAGAGGGGGGTTGGGACCGGTTGAACTGTTTATCCTCCTTTATCTGGGAATG
TGGCTCATTCGGGGGCTTCGGTTGATTTGGCTATTTTTTCTTTGCATCTTGCTGGTGCTT
CTTCTATTTTGGGGGCTGTTAATTTTATTTCTACGGTCGGTAATATACGATCTCCTGGGG
TGGTTGCTGAGCGAATCCCTTTATTTGTGTGGGCTGTGACGGTGACAGCGGTTTTATTAG
TAGCAGCTTTACCTGTGTTAGCTGGTGCTATTACTATGTTGCTTACTGATCGTAATTTAA
ATACGTCGTTTTTTGATCCTACAGGAGGGGGGGATCCGATTTTGTATATACACTTGTTTT
TCGTCCTCTGACA-CTA-CGATAGAGGATAATGCCTGCCCAGTGAATTTAAACGGCCGCG
TTAGCGTGAGCGTGCTAAGGTAGCGTAATAAATAGCCTCTTAATTGGAGGCCAGTGAAAG
GCAACACTAAGAACACCTATACCTTCAAAAAAACTTTTCGTCTGAGTGAAAAGCCTCAGA
TAATAAGGAAGACGAAAAGACCCCGCGGAGCTTTACTTTTTCTTCGCAATTAACAAA-AC
TGCAACAA-GTTTGATTGGGGCAATCTCGGAACC-ACCAAGCTTCCGA-CATTAAGAAAC
CAATCAAAAACTTATTATGGACAAGACAGAAGCTACCCCGGGGATAACAGCGTCATTCAA
CTTGAGAGTACACATCGAAAGTTGGGTTTGCGACCTCGATGTTGGCTTAAGGATTTCCGC
ATAAGTGCAGCCGCTATG-CAGGACAGTCTGTTCGACTATTATACCCTTATAAGCGGAGG
AAAAGAAACTAACAAGGATTCCCCCAGTAACGGCGAGTGAAGAGGGAAAAGCCCAGCACC
GAATCCCACAGCCTTGCGCTGTCGGGAACTGTGGTGTATAGGAAGCCTACTTGTCGTCGT
GTTCGGGTACCCAAGTCCTCCTGATCGTGGCCTCTCCCATAGCGGGTGTCAGGCCCATAG
AGGCACCCGACGGCGTCGGCTTGGAGCTTCCTCGGAGTCGGGTTGTTTGGGAATGCAGCC
CAAAGGGGTGGTAAACTCCATCTAAGGCTAAATACTGCCACGAGTCCGATAGCAAACAAG
TACCGTGAGGGAAAGTTGAAAAGAACTTTGAAGAGAGAGTTCAAGAGTACGTGAAACCGC
TTAGAGGCAAACGGGTGGACCCGCAATGTGTCGACTCGGGGGATTCAACCAGTGCGTCGG
GACGCGCTGGGGATGCGGAGCCGTAAAGCCCGTGCCTTGGCGCGGTCTCCGGGCGGACTG
GTGCACTTTCCTCGGGTCGATGGCCACGACCGGCTCTCCGCGGCCATAAGCCTGCTGCTG
GTAAGGTGACCCCGCGCCGTGGTGTTATAGACCAGCTTGTTCGTTGTGCTCGTCGGAGGG
CCGAGGTTGCCGCGTCTCGTCACCCTCGCCATCCTTGCTCGTCACGACTGGGGCGGACTG
GTCGGTCAGTGCTCTCCCGACCGCGAGCGTAGGAAGGGCTGGTACGGTGTGGGATGCTTC
GGGCCAGTGGCGAATCGGTCGGTCCTCCACCCGACC
>241_5_P_bogani
GTACTTTGTATTTGTTGTTGGCGTTATGGTCTGGGCTAATTGGGTTGGCTTTGAGTCTTT
TAATTCGGGCTGAGTTAGGGCAGCCTGGAAGACTGTTGGGGGATGACCAGCTTTATAATG
TAATTGTTACGGCTCATGCTTTTATGATAATTTTCTTTTTGGTGATGCCTATGATAATTG
GTGGTTTTGGTAATTGACTTATTCCCCTTATAATTGGGGCTCCAGATATGGCTTTTCCCC
GGCTTAATAACTTAAGGTTTTGGTTACTTGTGCCAGCTCTTTTTTTATTGTTAAGATCTT
CTTTAGTGGAGAGGGGGGTTGGGACCGGTTGAACTGTTTATCCTCCTTTATCTGGGAATG
TGGCTCATTCGGGGGCTTCGGTTGATTTGGCTATTTTTTCTTTGCATCTTGCTGGTGCTT
CTTCTATTTTGGGGGCTGTTAATTTTATTTCTACGGTCGGTAATATACGATCTCCTGGGG
TGGTTGCTGAGCGAATCCCTTTATTTGTGTGGGCTGTGACGGTGACAGCGGTTTTGTTAG
TAGCAGCTTTACCTGTGTTAGCTGGTGCTATTACTATGTTGCTTACTGATCGTAATTTAA
ATACGTCGTTTTTTGATCCTACAGGAGGGGGGGATCCGATTCTGTATATACACTTGTTTT
TCGTCCTCTGACA-CTA-CGATAGAGGATAATGCCTGCCCAGTGAATTTAAACGGCCGCG
TTAGCGTGAGCGTGCTAAGGTAGCGTAATAAATAGCCTCTTAATTGGAGGCCAGTGAAAG
GCAACACTAAGAACACCTATACCTTCAAAAAAACTTTTCGTCTGAGTGAAAAGCCTCAGA
TAATAAGGAAGACGAAAAGACCCCGCGGAGCTTTACTTTTTCTTCGCAATTAACAAA-AC
TGCAACAA-GTTTGATTGGGGCAATCTCGGAACC-ACCAAGCTTCCGA-CATTAAGAAAC
CAATCAAAAACTTATTATGGACAAGACAGAAGCTACCCCGGGGATAACAGCGTCATTCAA
CTTGAGAGTACACATCGAAAGTTGGGTTTGCGACCTCGATGTTGGCTTAAGGATTTCCGC
ATAAGTGCAGCCGCTATG-CAGGACAGTCTGTTCGACTATTATACCCTTATAAGCGGAGG
AAAAGAAACTAACAAGGATTCCCCCAGTAACGGCGAGTGAAGAGGGAAAAGCCCAGCACC
GAATCCCACAGCCTTGCGCTGTCGGGAACTGTGGTGTATAGGAAGCCTACTTGTCGTCGT
GTTCGGGTACCCAAGTCCTCCTGATCGTGGCCTCTCCCATAGCGGGTGTCAGGCCCATAG
AGGCACCCGACGGCGTCGGCTTGGAGCTTCCTCGGAGTCGGGTTGTTTGGGAATGCAGCC
CAAAGGGGTGGTAAACTCCATCTAAGGCTAAATACTGCCACGAGTCCGATAGCAAACAAG
TACCGTGAGGGAAAGTTGAAAAGAACTTTGAAGAGAGAGTTCAAGAGTACGTGAAACCGC
TTAGAGGCAAACGGGTGGACCCGCAATGTGTCGACTCGGGGGATTCAACCAGTGCGTCGG
GACGCGCTGGGGATGCGGAGCCGTAAAGCCCGTGCCTTGGCGCGGTCTCCGGGCGGACTG
GTGCACTTTCCTCGGGTCGATGGCCACGACCGGCTCTCCGCGGCCATAAGCCTGCTGCTG
GTAAGGTGACCCCGCGCCGTGGTGTTATAGACCAGCTTGTTCGTTGTGCTCGTCGGAGGG
CCGAGGTTGCCGCGTCTCGTCACCCTCGCCATCCTTGCTCGTCACGACTGGGGCGGACTG
GTCGGTCAGTGCTCTCCCGACCGCGAGCGTAGGAAGGGCTGGTACGGTGTGGGATGCTTC
GGGCCAGTGGCGAATCGGTCGGTCCTCCACCCGACC
>241_8_P_bogani
GTACTTTGTATTTGTTGTTGGCGTTATGGTCTGGGCTAATTGGGTTGGCTTTGAGTCTTT
TAATTCGGGCTGAGTTAGGGCAGCCTGGAAGACTGTTGGGGGATGACCAGCTTTATAATG
TAATTGTTACGGCTCATGCTTTTATGATAATTTTCTTTTTGGTGATGCCTATGATAATTG
GTGGTTTTGGTAATTGACTTATTCCCCTTATAATTGGGGCTCCAGATATGGCTTTTCCCC
GGCTTAATAACTTAAGGTTTTGGTTACTTGTGCCAGCTCTTTTTTTATTGTTAAGATCTT
CTTTAGTGGAGAGGGGGGTTGGGACCGGTTGAACTGTTTATCCTCCTTTATCTGGGAATG
TGGCTCATTCGGGGGCTTCGGTTGATTTGGCTATTTTTTCTTTGCATCTTGCTGGTGCTT
CTTCTATTTTGGGGGCTGTTAATTTTATTTCTACGGTCGGTAATATACGATCTCCTGGGG
TGGTTGCTGAGCGAATCCCTTTATTTGTGTGGGCTGTGACGGTGACAGCGGTTTTATTAG
TAGCAGCTTTACCTGTGTTAGCTGGTGCTATTACTATGTTGCTTACTGATCGTAATTTAA
ATACGTCGTTTTTTGATCCTACAGGAGGGGGGGATCCGATTCTGTATATACACTTGTTTT
TCGTCCTCTGACA-CTA-CGATAGAGGATAATGCCTGCCCAGTGAATTTAAACGGCCGCG
TTAGCGTGAGCGTGCTAAGGTAGCGTAATAAATAGCCTCTTAATTGGAGGCCAGTGAAAG
GCAACACTAAGAACACCTATACCTTCAAAAAAACTTTTCGTCTGAGTGAAAAGCCTCAGA
TAATAAGGAAGACGAAAAGACCCCGCGGAGCTTTACTTTTTCTTCGCAATTAACAAA-AC
TGCAACAA-GTTTGATTGGGGCAATCTCGGAACC-ACCAAGCTTCCGA-CATTAAGAAAC
CAATCAAAAACTTATTATGGACAAGACAGAAGCTACCCCGGGGATAACAGCGTCATTCAA
CTTGAGAGTACACATCGAAAGTTGGGTTTGCGACCTCGATGTTGGCTTAAGGATTTCCGC
ATAAGTGCAGCCGCTATG-CAGGACAGTCTGTTCGACTATTATACCCTTATAAGCGGAGG
AAAAGAAACTAACAAGGATTCCCCCAGTAACGGCGAGTGAAGAGGGAAAAGCCCAGCACC
GAATCCCACAGCCTTGCGCTGTCGGGAACTGTGGTGTATAGGAAGCCTACTTGTCGTCGT
GTTCGGGTACCCAAGTCCTCCTGATCGTGGCCTCTCCCATAGCGGGTGTCAGGCCCATAG
AGGCACCCGACGGCGTCGGCTTGGAGCTTCCTCGGAGTCGGGTTGTTTGGGAATGCAGCC
CAAAGGGGTGGTAAACTCCATCTAAGGCTAAATACTGCCACGAGTCCGATAGCAAACAAG
TACCGTGAGGGAAAGTTGAAAAGAACTTTGAAGAGAGAGTTCAAGAGTACGTGAAACCGC
TTAGAGGCAAACGGGTGGACCCGCAATGTGTCGACTCGGGGGATTCAACCAGTGCGTCGG
GACGCGCTGGGGATGCGGAGCCGTAAAGCCCGTGCCTTGGCGCGGTCTCCGGGCGGACTG
GTGCACTTTCCTCGGGTCGATGGCCACGACCGGCTCTCCGCGGCCATAAGCCTGCTGCTG
GTAAGGTGACCCCGCGCCGTGGTGTTATAGACCAGCTTGTTCGTTGTGCTCGTCGGAGGG
CCGAGGTTGCCGCGTCTCGTCACCCTCGCCATCCTTGCTCGTCACGACTGGGGCGGACTG
GTCGGTCAGTGCTCTCCCGACCGCGAGCGTAGGAAGGGCTGGTACGGTGTGGGATGCTTC
GGGCCAGTGGCGAATCGGTCGGTCCTCCACCCGACC
>246_1_P_manueli
GTACTTTATACTTGTTGTTGGCATTGTGGTCTGGGCTGATTGGGCTGGCTTTGAGGCTTT
TAATTCGGGCGGAGTTGGGGCAGCCTGGAAGGTTGTTGGGGGATGATCAGCTTTATAATG
TAATCGTTACGGCCCATGCTTTTATGATAATTTTCTTCTTGGTAATGCCTATGATGATTG
GTGGTTTTGGTAATTGGCTTATTCCGCTTATAATTGGGGCCCCAGACATAGCTTTTCCGC
GGCTTAATAATTTGAGGTTTTGATTACTTGTGCCGGCTCTTTTCTTGTTGTTGAGGTCTT
CTTTAGTAGAGAGGGGAGTTGGGACTGGTTGAACTGTTTATCCACCTTTGTCTGGAAATG
TGGCTCATTCTGGGGCTTCGGTCGATTTGGCTATTTTTTCTTTACATCTTGCTGGTGCTT
CTTCTATTTTGGGGGCTATTAATTTTATCTCTACGGTTGGTAATATGCGATCACCTGGGG
TGATTGCCGAGCGAATTCCTTTGTTTGTGTGGGCTGTAACGGTGACAGCTGTCTTGTTGG
TTGCGGCTTTGCCTGTGTTGGCTGGTGCTATTACTATGTTGCTTACTGATCGCAACTTGA
ATACGTCATTTTTCGATCCTACCGGAGGGGGGGATCCGATTTTGTATATGCATTTGTTTT
TCGTCCTCTGACA-CTA-CGATAGAGGATAATGCCTGCCCAGTGAACTTAAACGGCCGCG
TTAGCGTGAGCGTGCTAAGGTAGCGTAATAAATAGCCTCTTAATTGGAGGCCAGTGAAAG
GCAACACTAAGAACACCTGTACCTTCAAAAAAACTTTTCGTCTGAGTGAAAAGCCTCAGA
TAATAAGGAAGACGAAAAGACCCCGCGGAGCTTTACTTTTTCTTCGCAATAAACAAATAC
TGCAGCAA-GTTTGATTGGGGCAATCTCGGAACC-AACAAGCTTCCGA-CACCAAGAAAC
CAATTAAAAACTTATTGTGGACAAGACAGAAGCTACCCCGGGGATAACAGCGTCATTCAA
CTTGAGAGTACACATCGAAAGTTGGGTTTGCGACCTCGATGTTGGCTTAAGGATTTCCGC
ATAAGTGCAGCCGCTATG-CAGGACAGTCTGTTCGACTATTATACCCTTATAAGCGGAGG
AAAAGAAACTAACAAGGATTCCCCCAGTAACGGCGAGTGAAGAGGGAAAAGCCCAGCACC
GAATCCCACAGCCTTGCGCTGTCGGGAACTGTGGTGTATAGGAAGCCTACTTGTCGTCGT
GTTCGGGTACCCAAGTCCTCCTGATCGTGGCCTCTCCCATAGCGGGTGTCAGGCCCATAG
AGGCACCCGACGGCGTCGGCTTGGAGCTTCCTCGGAGTCGGGTTGTTTGGGAATGCAGCC
CAAAGGGGTGGTAAACTCCATCTAAGGCTAAATACTGCCACGAGTCCGATAGCAAACAAG
TACCGTGAGGGAAAGTTGAAAAGAACTTTGAAGAGAGAGTTCAAGAGTACGTGAAACCGC
TTAGAGGCAAACGGGTGGACCCGCAATGTGTCGACTCGGGGGATTCAACCAGTGCGTCGG
GACGCGCTGGGGATGCGGAGCCGTAAAGCCCGTGCCTTGGCGTGGTCTCCGGGCGGACTG
GTGCACTTTCCTCGGGTCGATKGCCACGACCGGCTCTCCGCGGCCATAAGCCTGCTGCTG
GTAAGGTGACCCCGCGCCGTGGTGTTATAGACCAGCTTGTTCGTTGTGCTCGTCGGAGGG
CCGAGGTTGCCGCGTCTCGTCACCCTCGCCATCCTTGCTCGTCACGACTGGGGCGGACTG
GTCGGTCAGTGCTCTCCCGACCGCGAGCGTAGGAAGGGCTGGTACGGTGTGAGATGCTTC
GGGCCAGTGGCGAATCGGTCGGTCCTCCACCCGACC
>246_3_P_manueli
GTACTTTATACTTGTTGTTGGCATTGTGGTCTGGGCTGATTGGGCTGGCTTTGAGGCTTT
TAATTCGGGCGGAGTTGGGGCAGCCTGGAAGGTTGTTGGGGGATGATCAGCTTTATAATG
TAATCGTTACGGCCCATGCTTTTATGATAATTTTCTTCTTGGTAATGCCTATGATGATTG
GTGGTTTTGGTAATTGGCTTATTCCGCTTATAATTGGGGCCCCAGACATAGCTTTTCCGC
GGCTTAATAATTTGAGGTTTTGATTACTTGTGCCGGCTCTTTTCTTATTGTTGAGGTCTT
CTTTAGTAGAGAGGGGAGTTGGGACTGGTTGAACTGTTTATCCACCTTTGTCTGGAAATG
TGGCTCATTCTGGGGCTTCGGTCGATTTGGCTATTTTTTCTTTACATCTTGCTGGTGCTT
CTTCTATTTTGGGGGCTATTAATTTTATCTCTACGGTTGGTAATATGCGATCACCTGGGG
TGATTGCCGAGCGAATTCCTTTGTTTGTGTGGGCTGTAACGGTGACAGCTGTCTTGTTGG
TTGCGGCTTTACCTGTGTTGGCTGGTGCTATTACTATGTTGCTTACTGATCGCAACTTGA
ATACGTCATTTTTCGATCCTACCGGAGGGGGGGATCCGATTTTGTATATGCATTTGTTTT
TCGTCCTCTGACA-CTA-CGATAGAGGATAATGCCTGCCCAGTGAACTTAAACGGCCGCG
TTAGCGTGAGCGTGCTAAGGTAGCGTAATAAATAGCCTCTTAATTGGAGGCCAGTGAAAG
GCAACACTAAGAACACCTGTACCTTCAAAAAAACTTTTCGTCTGAGTGAAAAGCCTCAGA
TAATAAGGAAGACGAAAAGACCCCGCGGAGCTTTACTTTTTCTTCGCAATAAACAAATAC
TGCAGCAA-GTTTGATTGGGGCAATCTCGGAACC-AACAAGCTTCCGA-CACCAAGAAAC
CAATTAAAAACTTATTGTGGACAAGACAGAAGCTACCCCGGGGATAACAGCGTCATTCAA
CTTGAGAGTACACATCGAAAGTTGGGTTTGCGACCTCGATGTTGGCTTAAGGATTTCCGC
ATAAGTGCAGCCGCTATG-CAGGACAGTCTGTTCGACTATTATACCCTTATAAGCGGAGG
AAAAGAAACTAACAAGGATTCCCCCAGTAACGGCGAGTGAAGAGGGAAAAGCCCAGCACC
GAATCCCACAGCCTTGCGCTGTCGGGAACTGTGGTGTATAGGAAGCCTACTTGTCGTCGT
GTTCGGGTACCCAAGTCCTCCTGATCGTGGCCTCTCCCATAGCGGGTGTCAGGCCCATAG
AGGCACCCGACGGCGTCGGCTTGGAGCTTCCTCGGAGTCGGGTTGTTTGGGAATGCAGCC
CAAAGGGGTGGTAAACTCCATCTAAGGCTAAATACTGCCACGAGTCCGATAGCAAACAAG
TACCGTGAGGGAAAGTTGAAAAGAACTTTGAAGAGAGAGTTCAAGAGTACGTGAAACCGC
TTAGAGGCAAACGGGTGGACCCGCAATGTGTCGACTCGGGGGATTCAACCAGTGCGTCGG
GACGCGCTGGGGATGCGGAGCCGTAAAGCCCGTGCCTTGGCGTGGTCTCCGGGCGGACTG
GTGCACTTTCCTCGGGTCGATGGCCACGACCGGCTCTCCGCGGCCATAAGCCTGCTGCTG
GTAAGGTGACCCMGCGCCGTGGTGTTATAGACCAGCTTGTYCGTTGTGCTCGTCGGAGGG
CCGAGGTTGCCGCGTCTCGWCACCCTCGCCATCCTTGCTCGTCACGACTGGGGCGGACTG
GTCGGTCAGTGCTCTCCCGACCGCGAGCGTAGGAAGGGCTGGTACGGTGTGGGATGCTTC
GGGCCAGTGGCGAATCGGTCGGTCCTCCACCCGACC
>246_8_P_manueli
GTACTTTATACTTGTTGTTGGCATTGTGGTCTGGGCTGATTGGGCTGGCTTTGAGGCTTT
TAATTCGGGCGGAGTTGGGGCAGCCTGGAAGGTTGTTGGGGGATGATCAGCTTTATAATG
TAATCGTTACGGCCCATGCTTTTATGATAATTTTCTTCTTGGTAATGCCTATGATGATTG
GTGGTTTTGGTAATTGGCTTATTCCGCTTATAATTGGGGCCCCAGACATAGCTTTTCCGC
GGCTTAATAATTTGAGGTTTTGATTACTTGTGCCGGCTCTTTTCTTGTTGTTGAGGTCTT
CTTTAGTAGAGAGGGGAGTTGGGACTGGTTGAACTGTTTATCCACCTTTGTCTGGAAATG
TGGCTCATTCTGGGGCTTCGGTCGATTTGGCTATTTTTTCTTTACATCTTGCTGGTGCTT
CTTCTATTTTGGGGGCTATTAATTTTATCTCTACGGTTGGTAATATGCGATCACCTGGGG
TGATTGCCGAGCGAATTCCTTTGTTTGTGTGGGCTGTAACGGTGACAGCTGTCTTGTTGG
TTGCGGCTTTGCCTGTGTTGGCTGGTGCTATTACTATGTTGCTTACTGATCGCAACTTGA
ATACGTCATTTTTCGATCCTACCGGAGGGGGGGATCCGATTTTGTATATGCATTTGTTTT
TCGTCCTCTGACA-CTA-CGATAGAGGATAATGCCTGCCCAGTGAACTTAAACGGCCGCG
TTAGCGTGAGCGTGCTAAGGTAGCGTAATAAATAGCCTCTTAATTGGAGGCCAGTGAAAG
GCAACACTAAGAACACCTGTACCTTCAAAAAAACTTTTCGTCTGAGTGAAAAGCCTCAGA
TAATAAGGAAGACGAAAAGACCCCGCGGAGCTTTACTTTTTCTTCGCAATAAACAAATAC
TGCAGCAA-GTTTGATTGGGGCAATCTCGGAACC-AACAAGCTTCCGA-CACCAAGAAAC
CAATTAAAAACTTATTGTGGACAAGACAGAAGCTACCCCGGGGATAACAGCGTCATTCAA
CTTGAGAGTACACATCGAAAGTTGGGTTTGCGACCTCGATGTTGGCTTAAGGATTTCCGC
ATAAGTGCAGCCGCTATG-CAGGACAGTCTGTTCGACTATTATACCCTTATAAGCGGAGG
AAAAGAAACTAACAAGGATTCCCCCAGTAACGGCGAGTGAAGAGGGAAAAGCCCAGCACC
GAATCCCACAGCCTTGCGCTGTCGGGAACTGTGGTGTATAGGAAGCCTACTTGTCGTCGT
GTTCGGGTACCCAAGTCCTCCTGATCGTGGCCTCTCCCATAGCGGGTGTCAGGCCCATAG
AGGCACCCGACGGCGTCGGCTTGGAGCTTCCTCGGAGTCGGGTTGTTTGGGAATGCAGCC
CAAAGGGGTGGTAAACTCCATCTAAGGCTAAATACTGCCACGAGTCCGATAGCAAACAAG
TACCGTGAGGGAAAGTTGAAAAGAACTTTGAAGAGAGAGTTCAAGAGTACGTGAAACCGC
TTAGAGGCAAACGGGTGGACCCGCAATGTGTCGACTCGGGGGATTCAACCAGTGCGTCGG
GACGCGCTGGGGATGCGGAGCCGTAAAGCCCGTGCCTTGGCGTGGTCTCCGGGCGGACTG
GTGCACTTTCCTCGGGTCGATGGCCACGACCGGCTCTCCGCGGCCATAAGCCTGCTGCTG
GTAAGGTGACCCCGCGCCGTGGTGTTATAGACCAGCTTGTCYGTTGTGCTCGTCGGAGGG
CCGAGGTTGCCGCGTCTCGWCACCCTCGCCATCCTTGCTCGTCACGACTGGGGCGGACTG
GTCGGTCAGTGCTCTCCCGACCGCGAGCGTAGGAAGGGCTGGTACGGTGTGGGATGCTTC
GGGCCAGTGGCGAATCGGTCGGTCCTCCACCCGACC
>639_1_P_salwenianus
GTACTTTATACTTGTTGTTGGCATTGTGGTCTGGGCTGATTGGGCTGGCTTTGAGGCTTT
TAATTCGGGCGGAGTTGGGGCAGCCTGGAAGGTTGTTGGGGGATGATCAGCTTTATAATG
TAATCGTTACGGCCCATGCTTTTATGATAATTTTCTTCTTGGTAATGCCTATGATGATTG
GTGGTTTTGGTAATTGGCTTATTCCGCTTATAATTGGGGCCCCAGACATAGCTTTTCCGC
GGCTTAATAATTTGAGGTTTTGATTACTTGTGCCGGCTCTTTTCTTACTGTTGAGGTCCT
CTTTAGTAGAGAGGGGGGTTGGGACTGGTTGAACTGTTTATCCACCTTTGTCTGGAAATG
TGGCTCATTCTGGGGCTTCGGTCGATTTGGCTATTTTTTCTTTACATCTTGCTGGTGCTT
CTTCTATTTTGGGGGCTATTAATTTTATCTCTACGGTTGGTAATATGCGATCACCTGGGG
TGATTGCCGAGCGAATTCCTTTGTTTGTGTGGGCTGTAACGGTGACAGCTGTCTTGTTGG
TTGCGGCTTTGCCTGTGTTGGCTGGTGCTATTACTATGTTGCTTACTGATCGCAACTTGA
ATACGTCATTTTTCGATCCTACCGGAGGGGGGGATCCGATTTTGTATATGCATTTGTTTT
TCGTCCTCTGACATCTA-CGATAGAGGATAATGCCTGCCCAGTGAACTTAAACGGCCGCG
TTAGCGTGAGCGTGCTAAGGTAGCGTAATAAATAGCCTCTTAATTGGAGGCCAGTGAAAG
GCAACACTAAGAACACCTGTACCTTCAAAAAAACTTTTCGTCTGAGTGAAAAGCCTCAGA
TAATAAGGAAGACGAAAAGACCCCGCGGAGCTTTACTTTTTCTTCGCAATAAACAAATAC
TGCAGCAA-GTTTGATTGGGGCAATCTCGGAACC-AACAAGCTTCCGA-CACCAAGAAAC
CAATTAAAAACTTATTGTGGACAAGACAGAAGCTACCCCGGGGATAACAGCGTCATTCAA
CTTGAGAGTACACATCGAAAGTTGGGTTTGCGACCTCGATGTTGGCTTAAGGATTTCCGC
ATAAGTGCAGCCGCTATG-CAGGACAGTCTGTTCGACTATTATACCCTTATAAGCGGAGG
AAAAGAAACTAACAAGGATTCCCCCAGTAACGGCGAGTGAAGAGGGAAAAGCCCAGCACC
GAATCCCACAGCCTTGCGCTGTCGGGAACTGTGGTGTATAGGAAGCCTACTTGTCGTCGT
GTTCGGGTACCCAAGTCCTCCTGATCGTGGCCTCTCCCATAGCGGGTGTCAGGCCCATAG
AGGCACCCGACGGCGTCGGCTTGGAGCTTCCTCGGAGTCGGGTTGTTTGGGAATGCAGCC
CAAAGGGGTGGTAAACTCCATCTAAGGCTAAATACTGCCACGAGTCCGATAGCAAACAAG
TACCGTGAGGGAAAGTTGAAAAGAACTTTGAAGAGAGAGTTCAAGAGTACGTGAAACCGC
TTAGAGGCAAACGGGTGGACCCGCAATGTGTCGACTCGGGGGATTCAACCAGTGCGTCGG
GACGCGCTGGGGATGCGGAGCCGTAAAGCCCGTGCCTTGGCGTGGTCTCCGGGCGGACTG
GTGCACTTTCCTCGGGTCGATGGCCACGACCGGCTCTCCGCGGCCATAAGCCTGCTGCTG
GTAAGGTGACCCCGCGCCGTGGTGTTATAGACCAGCTTGTTCGTTGTGCTCGTCGGAGGG
CCGAGGTTGCCGCGTCTCGTCACCCTCGCCATCCTTGCTCGTCACGACTGGGGCGGACTG
GTCGGTCAGTGCTCTCCCGACCGCGAGCGTAGGAAGGGCTGGTACGGTGTGGGATGCTTC
GGGCCAGTGGCGAATCGGTCGGTCCTCCACCCGACC
>674_1_P_salwenianus
GTACTTTATACTTGTTGTTGGCATTGTGGTCTGGGCTGATTGGGCTGGCTTTGAGGCTTT
TAATTCGGGCGGAGTTGGGGCAGCCTGGAAGGTTGTTGGGGGATGATCAGCTTTATAATG
TAATCGTTACGGCCCATGCTTTTATGATAATTTTCTTCTTGGTAATGCCTATGATGATTG
GTGGTTTTGGTAATTGGCTTATTCCGCTTATAATTGGGGCCCCAGACATAGCTTTTCCGC
GGCTTAATAATTTGAGGTTTTGATTACTTGTGCCGGCTCTTTTCTTACTGTTGAGGTCCT
CTTTAGTAGAGAGGGGGGTTGGGACTGGTTGAACTGTTTATCCACCTTTGTCTGGAAATG
TGGCTCATTCTGGGGCTTCGGTCGATTTGGCTATTTTTTCTTTACATCTTGCTGGTGCTT
CTTCTATTTTGGGGGCTATTAATTTTATCTCTACGGTTGGTAATATGCGATCACCTGGGG
TGATTGCCGAGCGAATTCCTTTGTTTGTGTGGGCTGTAACGGTGACAGCTGTCTTGTTGG
TTGCGGCTTTGCCTGTGTTGGCTGGTGCTATTACTATGTTGCTTACTGATCGCAACTTGA
ATACGTCATTTTTCGATCCTACCGGAGGGGGGGATCCGATTTTGTATATGCATTTGTTTT
TCGTCCTCTGACATCTA-CGATAGAGGATAATGCCTGCCCAGTGAACTTAAACGGCCGCG
TTAGCGTGAGCGTGCTAAGGTAGCGTAATAAATAGCCTCTTAATTGGAGGCCAGTGAAAG
GCAACACTAAGAACACCTGTACCTTCAAAAAAACTTTTCGTCTGAGTGAAAAGCCTCAGA
TAATAAGGAAGACGAAAAGACCCCGCGGAGCTTTACTTTTTCTTCGCAATAAACAAATAC
TGCAGCAA-GTTTGATTGGGGCAATCTCGGAACC-AACAAGCTTCCGA-CACCAAGAAAC
CAATTAAAAACTTATTGTGGACAAGACAGAAGCTACCCCGGGGATAACAGCGTCATTCAA
CTTGAGAGTACACATCGAAAGTTGGGTTTGCGACCTCGATGTTGGCTTAAGGATTTCCGC
ATAAGTGCAGCCGCTATG-CAGGACAGTCTGTTCGACTATTATACCCTTATAAGCGGAGG
AAAAGAAACTAACAAGGATTCCCCCAGTAACGGCGAGTGAAGAGGGAAAAGCCCAGCACC
GAATCCCACAGCCTTGCGCTGTCGGGAACTGTGGTGTATAGGAAGCCTACTTGTCGTCGT
GTTCGGGTACCCAAGTCCTCCTGATCGTGGCCTCTCCCATAGCGGGTGTCAGGCCCATAG
AGGCACCCGACGGCGTCGGCTTGGAGCTTCCTCGGAGTCGGGTTGTTTGGGAATGCAGCC
CAAAGGGGTGGTAAACTCCATCTAAGGCTAAATACTGCCACGAGTCCGATAGCAAACAAG
TACCGTGAGGGAAAGTTGAAAAGAACTTTGAAGAGAGAGTTCAAGAGTACGTGAAACCGC
TTAGAGGCAAACGGGTGGACCCGCAATGTGTCGACTCGGGGGATTCAACCAGTGCGTCGG
GACGCGCTGGGGATGCGGAGCCGTAAAGCCCGTGCCTTGGCGTGGTCTCCGGGCGGACTG
GTGCACTTTCCTCGGGTCGATGGCCACGACCGGCTCTCCGCGGCCATAAGCCTGCTGCTG
GTAAGGTGACCCCGCGCCGTGGTGTTATAGACCAGCTTGTCTGTTGTGCTCGTCGGAGGG
CCGAGGTTGCCGCGTCTCGACACCCTCGCCATCCTTGCTCGTCACGACTGGGGCGGACTG
GTCGGTCAGTGCTCTCCCGACCGCGAGCGTAGGAAGGGCTGGTACGGTGTGGGATGCTTC
GGGCCAGTGGCGAATCGGTCGGTCCTCCACCCGACC
>2012_0443_T_foliaceus
NNNNACTATATTTATTATTTGCTTTGTGATCTGGATTAATTGGGTTGGCTTTGAGTCTTT
TAATTCGGGCGGAGTTAGGGCAACCGGGAAGACTACTTGGGGATGATCAACTTTATAACG
TAATTGTAACTGCTCATGCTTTTATGATAATTTTTTTCTTGGTTATGCCCATAATAATTG
GAGGTTTTGGTAATTGGTTGATTCCTTTGATAATTGGGGCGCCTGATATGGCTTTTCCTC
GGTTAAATAATTTGAGGTTTTGGTTGCTTGTGCCGGCTCTTTTTTTGTTATTAAGGTCTT
CTCTTGTAGAGAGTGGAGTTGGGACTGGTTGAACTGTGTACCCTCCTTTGTCGGGTAATG
TGGCTCATTCTGGTGCTTCGGTGGATTTAGCTATTTTTTCGCTGCATCTTGCCGGTGCTT
CTTCTATTTTAGGGGCTATTAATTTTATTTCTACTGTAGGAAATATGCGTTCTCCTGGGT
TGGTTGCTGAGCGAATTCCTTTATTTGTGTGGGCTGTAACTGTGACAGCGATTTTGTTAG
TAGCTGCGTTGCCTGTGTTGGCTGGGGCTATTACGATGTTACTTACTGATCGTAATTTAA
ATACGTCCTTCTTTGATCCTACTGGTGGGGGAGATCCTATTTTATACATACACTTGTTNN
TCGTCTTTTGTACACTT-TTATAAAAGATAATGCCTGCCCAGTGAATTTAAACGGCCGCG
TTAGCGTGAGCGTGCTAAGGTAGCGTAATAATTAGCCTCTTAATTGGAGGCCAGTGAAAG
GCAACACGAGGAACACCTATACTTTAAAAAAAACTTTTCTTCTAAGTGAAAAGCCTTAGA
TACTAAAGAAGACGAAAAGACCCCGCGGAACTTTACCTTTTCTCTACAAC-ACAAACATA
TGTATCAAGGTTTGATTGGGGCAATCTCGGAACCATCCAAACTTCCGATTTTTTTTTAAC
TGATCAAAAATTTGTTTCGGACCAAAAAGAAGTTACCCCGGGGATAACAGCGTTATCCAA
CTTAAGAGTACACATCGAAAGTTGGGTTTGCGACCTCGATGTTGGCTTAAGGACATCCAC
ATAAGTGCAGCCGCTATGAATGGATAGTCTGTTCGACTATTATAACCTTATAAGCGGAGG
AAAAGAAACTAACAAGGATTCCCTTAGTAACGGCGAGTGAAGAGGGAAAAGCCCAGCACC
GAATCCCACAGCCTTGCGCTGTCGGGAACTGTGGTGTATAGGAAGCCTACCTGTCGGCGC
GCTCGGGTGCCCAAGTCCTCCTGATCGTGGCCTCTCCCACAGCGGGTGTCAGGCCCGTAG
AGGCACTCGACGTGGTCGGCTCGGAGCTTCCTCGGAGTCGGGTTGTTTGGGAATGCAGCC
CAAAGGGGTGGTAAACTCCATCTAAGGCTAAATACGTCCACGAGTCCGATAGCAAACAAG
TACCGTGAGGGAAAGTTGAAAAGAACTTTGAAGAGAGAGTTCAAGAGTACGTGAAACCGC
TTAGAGGCAAACGGATGGACCCGCAATGGGTCGGCCCGGGGGATTCAACCGGTGCGTCGG
GACGCGCGGGGGATGCGGAGCTGTAAAGCCCGTGCCTTCGCGTGGTCTCCGGGCGGACCG
GTGCACTTTCCTCGGGTCGACGGCCACGACCGGCTCTCCGCGGCCACAAGCCTGTCGCTG
GGAAGGTGACCCCGCGCCGCGGCGTTACAGCCCAGCCAGTTGGTTGAGCTCGTCGGAGGG
CCGAGGTTGCCGCTTCTCGTCACCCTCGCCATCCTTGCTCGTCACGACCGGGGCGGACTG
GTCGGTCAGTGCTCTCCCGACCGCGAGCGTAGGAAGGGCGGGTACGGTGCGAGATGCTTC
GGGCCGGTGGCGAATCGGTCGGTCCTNNNNNNNNNN
>ICH_02104_T_foliaceus
NNNNNNNNNNNNNNNNNNNTGCTTTGTGATCTGGATTAATTGGGTTGGCTTTGAGTCTTT
TAATTCGGGCGGAGTTAGGGCAACCGGGAAGACTACTTGGGGATGATCAACTTTATAACG
TAATTGTAACTGCTCATGCTTTTATGATAATTTTTTTCTTGGTTATGCCCATAATAATTG
GAGGTTTTGGTAATTGGTTGATTCCTTTGATAATTGGGGCGCCTGATATGGCTTTTCCTC
GGTTAAATAATTTGAGGTTTTGGTTGCTTGTGCCGGCTCTTTTTTTGTTATTAAGGTCTT
CTCTTGTAGAGAGTGGAGTTGGGACTGGTTGAACTGTGTACCCTCCTTTGTCGGGTAATG
TGGCTCATTCTGGTGCTTCGGTGGATTTAGCTATTTTTTCGCTGCATCTTGCCGGTGCTT
CTTCTATTTTAGGGGCTATTAATTTTATTTCTACTGTAGGAAATATGCGTTCTCCTGGGT
TGGTTGCTGAGCGAATTCCTTTATTTGTGTGGGCTGTAACTGTGACAGCGATTTTGTTAG
TAGCTGCGTTGCCTGTGTTGGCTGGGGCTATTACGATGTTACTTACTGATCGTAATTTAA
ATACGTCCTTCTTTGATCCTACTGGTGGGGGAGATCCTATTTTATACATACACTTGTTTT
TCGTCTTTTGTACACTT-TTATAAAAGATAATGCCTGCCCAGTGAATTTAAACGGCCGCG
TTAGCGTGAGCGTGCTAAGGTAGCGTAATAATTAGCCTCTTAATTGGAGGCCAGTGAAAG
GCAACACGAGGAACACCTATACTTTAAAAAAAACTTTTCTTCTAAGTGAAAAGCCTTAGA
TACTAAAGAAGACGAAAAGACCCCGCGGAACTTTACCTTTTCTCTACAAC-ACAAACATA
TGTATCAAGGTTTGATTGGGGCAATCTCGGAACCATCCAAACTTCCGATTTTTTTTTAAC
TGATCAAAAATTTGTTTCGGACCAAAAAGAAGTTACCCCGGGGATAACAGCGTTATCCAA
CTTAAGAGTACACATCGAAAGTTGGGTTTGCGACCTCGATGTTGGCTTAAGGACATCCAC
ATAAGTGCAGCCGCTATGAATGGATAGTCTGTTCGACTATTATAACCTTATAAGCGGAGG
AAAAGAAACTAACAAGGATTCCCTTAGTAACGGCGAGTGAAGAGGGAAAAGCCCAGCACC
GAATCCCACAGCCTTGCGCTGTCGGGAACTGTGGTGTATAGGAAGCCTACCTGTCGGCGC
GCTCGGGTGCCCAAGTCCTCCTGATCGTGGCCTCTCCCACAGCGGGTGTCAGGCCCGTAG
AGGCACTCGACGTGGTCGGCTCGGAGCTTCCTCGGAGTCGGGTTGTTTGGGAATGCAGCC
CAAAGGGGTGGTAAACTCCATCTAAGGCTAAATACGTCCACGAGTCCGATAGCAAACAAG
TACCGTGAGGGAAAGTTGAAAAGAACTTTGAAGAGAGAGTTCAAGAGTACGTGAAACCGC
TTAGAGGCAAACGGATGGACCCGCAATGGGTCGGCCCGGGGGATTCAACCGGTGCGTCGG
GACGCGCGGGGGATGCGGAGCTGTAAAGCCCGTGCCTTCGCGTGGTCTCCGGGCGGACCG
GTGCACTTTCCTCGGGTCGACGGCCACGACCGGCTCTCCGCGGCCACAAGCCTGTCGCTG
GGAAGGTGACCCCGCGCCGCGGCGTTACAGCCCAGCCAGTTGGTTGAGCTCGTCGGAGGG
CCGAGGTTGCCGCTTCTCGTCACCCTCGCCATCCTTGCTCGTCACGACCGGGGCGGACTG
GTCGGTCAGTGCTCTCCCGACCGCGAGCGTAGGAAGGGCGGGTACGGTGCGAGATGCTTC
GGGCCGGTGGCGAATCGGTCGGTCCTNNNNNNNNNN
>ICH_02105_T_foliaceus
NNNNNNNNNNNNNNNTATTTGCTTTGTGATCTGGATTAATTGGGTTGGCTTTGAGTCTTT
TAATTCGGGCGGAGTTAGGGCAACCGGGAAGACTACTTGGGGATGATCAACTTTATAACG
TAATTGTAACTGCTCATGCTTTTATGATAATTTTTTTCTTGGTTATGCCCATAATAATTG
GAGGTTTTGGTAATTGGTTGATTCCTTTGATAATTGGGGCGCCTGATATGGCTTTTCCTC
GGTTAAATAATTTGAGGTTTTGGTTGCTTGTGCCGGCTCTTTTTTTGTTATTAAGGTCTT
CTCTTGTAGAGAGTGGAGTTGGGACTGGTTGAACTGTGTACCCTCCTTTGTCGGGTAATG
TGGCTCATTCTGGTGCTTCGGTGGATTTAGCTATTTTTTCGCTGCATCTTGCCGGTGCTT
CTTCTATTTTAGGGGCTATTAATTTTATTTCTACTGTAGGAAATATGCGTTCTCCTGGGT
TGGTTGCTGAGCGAATTCCTTTATTTGTGTGGGCTGTAACTGTGACAGCGATTTTGTTAG
TAGCTGCGTTGCCTGTGTTGGCTGGGGCTATTACGATGTTACTTACTGATCGTAATTTAA
ATACGTCCTTCTTTGATCCTACTGGTGGGGGAGATCCTATTTTATACATACACTTGTTTT
TCGTCTTTTGTACACTT-TTATAAAAGATAATGCCTGCCCAGTGAATTTAAACGGCCGCG
TTAGCGTGAGCGTGCTAAGGTAGCGTAATAATTAGCCTCTTAATTGGAGGCCAGTGAAAG
GCAACACGAGGAACACCTATACTTTAAAAAAAACTTTTCTTCTAAGTGAAAAGCCTTAGA
TACTAAAGAAGACGAAAAGACCCCGCGGAACTTTACCTTTTCTCTACAAC-ACAAACATA
TGTATCAAGGTTTGATTGGGGCAATCTCGGAACCATCCAAACTTCCGATTTTTTTTTAAC
TGATCAAAAATTTGTTTCGGACCAAAAAGAAGTTACCCCGGGGATAACAGCGTTATCCAA
CTTAAGAGTACACATCGAAAGTTGGGTTTGCGACCTCGATGTTGGCTTAAGGACATCCAC
ATAAGTGCAGCCGCTATGAATGGATAGTCTGTTCGACTATTATAACCTTATAAGCGGAGG
AAAAGAAACTAACAAGGATTCCCTTAGTAACGGCGAGTGAAGAGGGAAAAGCCCAGCACC
GAATCCCACAGCCTTGCGCTGTCGGGAACTGTGGTGTATAGGAAGCCTACCTGTCGGCGC
GCTCGGGTGCCCAAGTCCTCCTGATCGTGGCCTCTCCCACAGCGGGTGTCAGGCCCGTAG
AGGCACTCGACGTGGTCGGCTCGGAGCTTCCTCGGAGTCGGGTTGTTTGGGAATGCAGCC
CAAAGGGGTGGTAAACTCCATCTAAGGCTAAATACGTCCACGAGTCCGATAGCAAACAAG
TACCGTGAGGGAAAGTTGAAAAGAACTTTGAAGAGAGAGTTCAAGAGTACGTGAAACCGC
TTAGAGGCAAACGGATGGACCCGCAATGGGTCGGCCCGGGGGATTCAACCGGTGCGTCGG
GACGCGCGGGGGATGCGGAGCTGTAAAGCCCGTGCCTTCGCGTGGTCTCCGGGCGGACCG
GTGCACTTTCCTCGGGTCGACGGCCACGACCGGCTCTCCGCGGCCACAAGCCTGTCGCTG
GGAAGGTGACCCCGCGCCGCGGCGTTACAGCCCAGCCAGTTGGTTGAGCTCGTCGGAGGG
CCGAGGTTGCCGCTTCTCGTCACCCTCGCCATCCTTGCTCGTCACGACCGGGGCGGACTG
GTCGGTCAGTGCTCTCCCGACCGCGAGCGTAGGAAGGGCGGGTACGGTGCGAGATGCTTC
GGGCCGGTGGCGAATCGGTCGGTCCTNNNNNNNNNN
>629_1_T_lenya
GTACATTATATTTGTTATTTGCTTTGTGATCTGGGTTGATTGGGTTGGCTTTGAGTCTTT
TAATTCGGGCGGAGTTAGGGCAACCAGGAAGGTTACTCGGGGATGATCAACTTTATAACG
TAATTGTAACTGCTCATGCTTTTATGATAATTTTTTTCTTGGTTATGCCTATAATAATTG
GAGGTTTTGGTAATTGGTTGATTCCTTTAATAATTGGGGCGCCTGATATGGCTTTTCCTC
GGTTAAATAATTTGAGGTTTTGGTTGCTTGTGCCGGCTCTTTTTTTGTTATTAAGGTCTT
CTCTTGTAGAGAGTGGGGTTGGGACTGGTTGAACTGTGTACCCTCCTTTGTCTGGTAATG
TGGCGCATTCTGGTGCTTCGGTTGATTTAGCCATTTTTTCATTACATCTTGCTGGTGCTT
CTTCTATTTTAGGGGCTATTAATTTTATTTCTACTGTAGGGAATATGCGTTCTCCTGGAT
TGGTTGCTGAGCGAATTCCTTTATTTGTGTGGGCTGTAACTGTGACGGCGATTTTGTTAG
TAGCTGCGTTGCCTGTATTGGCTGGGGCTATTACGATGTTACTCACTGATCGTAATTTGA
ATACGTCTTTCTTTGACCCTACTGGTGGAGGAGATCCTATTTTATATATACACCTGTTTT
NNNNNNNNNNNNNNNNNNNNNNNNNNNNNNNNNNNNNNNNNNNNNNNNNNNNNNNNNNNN
NNNNNNNNNNNNNNNNNNNNNNNNNNNNNNNNNNNNNNNNNAATTGGAGGCCAGTGAAAG
GCAACACGAGGAACACCTATACTTTAAAAAAAACTTTTCTTCTAAGTGAAAAGCCTTAGA
TACTAAAGAAGACGAAAAGACCCCGCGGAACTTTACCTTTTCCCTACAAC-ACAAACATA
TGTATCAAGGTTTGATTGGGGCAATCTCGGAACCACCCAAACTTCCGATTTTATTTTAAC
TGATCAAAAATTTGTTTCAGACCAAAAAGGAGTTACCCCGGGGATAACAGCGTTATCCAA
CTTAAGAGTACACATCGAAAGTTGGGTTTGCGACCTCGATGTTGGCTTAAGGACATCCAC
ATAAGTGCAGCCGCTATGAATGGATAGTCTGTTCGACTATTATAACCTTATAAGCGGAGG
AAAAGAAACTAACAAGGATTCCCTTAGTAACGGCGAGTGAAGAGGGAAAAGCCCAGCACC
GAATCCCACAGCCTTGCGCTGTCGGGAACTGTGGTGTATAGGAAGCCTACCTGTCGGCGC
GCTCGGGTGCCCAAGTCCTCCTGATCGTGGCCTCTCCCACAGCGGGTGTCAGGCCCGTAG
AGGCACTCGACGTGGTCGGCTCGGAGCTTCCTCGGAGTCGGGTTGTTTGGGAATGCAGCC
CAAAGGGGTGGTAAACTCCATCTAAGGCTAAATACGTCCACGAGTCCGATAGCAAACAAG
TACCGTGAGGGAAAGTTGAAAAGAACTTTGAAGAGAGAGTTCAAGAGTACGTGAAACCGC
TTAGAGGCAAACGGATGGACCCGCAATGGGTCGGCCCGGGGGATTCAACCGGTGCGTCGG
GACGCGCGGGGGATGCGGAGCTGTAAAGCCCGTGCCTTCGCGTGGTCTCCGGGCGGACCG
GTGCACTTTCCTCGGGTCGACGGCCACGACCGGCTCTCCGCGGCCACAAGCCTGTCGCTG
GGAAGGTGACCCCGCGCCGCGGCGTTACAGCCCAGCCAGTTGGTTGAGCTCGTCGGAGGG
CCGAGGTTGCCGCTTCTCGTCACCCTCGCCATCCTTGCTCGTCACGACCGGGGCGGACTG
GTCGGTCAGTGCTCTCCCGACCGCGAGCGTAGGAAGGGCGGGTACGGTGCGAGATGCTTC
GGGCCGGTGGCGAATCGGTCGGTCCTCCNNNNNNNN
>1021_2_T_mitanensis
GTACATTGTATTTGTTATTTGCTTTGTGATCTGGGTTGATTGGGTTGGCTTTGAGTCTTT
TAATTCGAGCTGAGTTAGGGCAACCAGGAAGGTTACTTGGGGATGACCAACTTTATAATG
TAATTGTGACTGCTCATGCTTTTATGATGATTTTTTTCTTGGTTATGCCTATAATAATTG
GGGGTTTTGGTAACTGGTTAATTCCTTTAATAATTGGGGCGCCTGATATAGCTTTTCCTC
GGTTAAATAATTTGAGATTTTGGTTACTTGTACCGGCTCTTTTTTTGTTATTAAGGTCTT
CTCTTGTAGAAAGTGGGGTTGGAACTGGTTGAACTGTGTATCCTCCTTTGTCAGGTAATG
TGGCGCATTCTGGTGCTTCGGTAGATTTGGCTATTTTTTCATTACATCTTGCTGGTGCTT
CTTCTATTCTAGGGGCTATTAATTTTATTTCTACTGTAGGAAATATGCGTTCTCCTGGGT
TGGTTGCTGAGCGAATTCCTTTATTTGTGTGGGCTGTAACTGTGACAGCGATTTTGTTAG
TAGCTGCGTTGCCTGTGTTGGCTGGGGCTATTACTATGCTACTTACTGATCGCAATTTAA
ATACGTCTTTCTTTGATCCTACTGGTGGGGGAGATCCTATTTTGTATATACACTTGTTTT
NNNNNNNNNNNNNNNNNNNNNNNNNNNNNNNNNNNNNNNNNNNNNNTTTAAACGGCCGCG
TTAGCGTGAGCGTGCTAAGGTAGCGTAATAATTAGCCTCTTAATTGGAGGCCAGTGAAAG
GCAACACGAGGAACACCTATACTTTAAAAAAAACTTTTCTTCTAAGTGAAAAGCCTTAGA
TACTAAAGAAGACGAAAAGACCCCGCGGAACTTTACCTTTTCACGACAAC-ACAAACATA
TGTATTAAGGTTTGATTGGGGCAATCTCGGAACAATCCAAACTTCCGATTTTATTTTAAC
TGATCAAAAACTTGTTTCGGACCAAAAAGAAGTTACCCCGGGGATAACAGCGTTATCCAA
CTTAAGAGTACACATCGAAAGTTGGGTTTGCGACCTCGATGTTGGCTTAAGGACATCCAC
ATAAGTGCAGCCGCTATGAATGGATAGTCTGTTCGACTATTATAACCTTATAAGCGGAGG
AAAAGAAACTAACAAGGATTCCCTTAGTAACGGCGAGTGAAGAGGGAAAAGCCCAGCACC
GAATCCCACAGCCTTGCGCTGTCGGGAACTGTGGTGTATAGGAAGCCTACCTGTCGGCGC
GCTCGGGTGCCCAAGTCCTCCTGATCGTGGCCTCTCCCACAGCGGGTGTCAGGCCCGTAG
AGGCACTCGACGTGGTCGGCTCGGAGCTTCCTCGGAGTCGGGTTGTTTGGGAATGCAGCC
CAAAGGGGTGGTAAACTCCATCTAAGGCTAAATACGTCCACGAGTCCGATAGCAAACAAG
TACCGTGAGGGAAAGTTGAAAAGAACTTTGAAGAGAGAGTTCAAGAGTACGTGAAACCGC
TTAGAGGCAAACGGATGGACCCGCAATGGGTCGGCCCGGGGGATTCAACCGGTGCGTCGG
GACGCGCGGGGGATGCGGAGCTGTAAAGCCCGTGCCTTCGCGTGGTCTCCGGGCGGACCG
GTGCACTTTCCTCGGGTCGACGGCCACGACCGGCTCTCCGCGGCCACAAGCCTGTCGCTG
GGAAGGTGACCCCGCGCCGCGGCGTTACAGCCCAGCCAGTTCGTTGAGCTCGTCGGAGGG
CCGAGGTTGCCGCTTCTCGTCACCCTCGCCATCCTTGCTCGTCACGACCGGGGCGGACTG
GTCGGTCAGTGCTCTCCCGACCGCGAGCGTAGGAAGGGCGGGTACGGTGCGAGATGCTTC
GGGCCGGTGGCGAATCGGTCGGTCCTCCATCCGACC
>1022_2_T mitanensis
GTACATTGTATTTGTTATTTGCTTTGTGATCTGGGTTGATTGGGTTGGCTTTGAGTCTTT
TAATTCGAGCTGAGTTAGGGCAACCAGGAAGGTTACTTGGGGATGACCAACTTTATAATG
TAATTGTGACTGCTCATGCTTTTATGATGATTTTTTTCTTGGTTATGCCTATAATAATTG
GGGGTTTTGGTAACTGGTTAATTCCTTTAATAATTGGGGCGCCTGATATAGCTTTTCCTC
GGTTAAATAATTTGAGATTTTGGTTACTTGTACCGGCTCTTTTTTTGTTATTAAGGTCTT
CTCTTGTAGAAAGTGGGGTTGGAACTGGTTGAACTGTGTACCCTCCTTTGTCAGGTAATG
TGGCGCATTCTGGTGCTTCGGTAGATTTGGCTATTTTTTCATTACATCTTGCTGGTGCTT
CTTCTATTCTAGGGGCTATTAATTTTATTTCTACTGTAGGAAATATGCGTTCTCCTGGGT
TGGTTGCTGAGCGAATTCCTTTATTTGTGTGGGCTGTAACTGTGACAGCGATTTTGTTAG
TAGCTGCGTTGCCTGTGTTGGCTGGGGCTATTACTATGCTACTTACTGATCGCAATTTAA
ATACGTCTTTCTTTGATCCTACTGGTGGGGGAGATCCTATTTTGTATATACACTTGTTTT
NNNNNNNNNNNNNNNNNNNNNNNNNNNNNNNNNNNNNNNNNNNNNNTTTAAACGGCCGCG
TTAGCGTGAGCGTGCTAAGGTAGCGTAATAATTAGCCTCTTAATTGGAGGCCAGTGAAAG
GCAACACGAGGAACACCTATACTTTAAAAAAAACTTTTCTTCTAAGTGAAAAGCCTTAGA
TACTAAAGAAGACGAAAAGACCCCGCGGAACTTTACCTTTTCACGACAAC-ACAAACATA
TGTATTAAGGTTTGATTGGGGCAATCTCGGAACAATCCAAACTTCCGATTTTATTTTAAC
TGATCAAAAACTTGTTTCGGACCAAAAAGAAGTTACCCCGGGGATAACAGCGTTATCCAA
CTTAAGAGTACACATCGAAAGTTGGGTTTGCGACCTCGATGTTGGCTTAAGGACATCCAC
ATAAGTGCAGCCGCTATGAATGGATAGTCTGTTCGACTATTATAACCTTATAAGCGGAGG
AAAAGAAACTAACAAGGATTCCCTTAGTAACGGCGAGTGAAGAGGGAAAAGCCCAGCACC
GAATCCCACAGCCTTGCGCTGTCGGGAACTGTGGTGTATAGGAAGCCTACCTGTCGGCGC
GCTCGGGTGCCCAAGTCCTCCTGATCGTGGCCTCTCCCACAGCGGGTGTCAGGCCCGTAG
AGGCACTCGACGTGGTCGGCTCGGAGCTTCCTCGGAGTCGGGTTGTTTGGGAATGCAGCC
CAAAGGGGTGGTAAACTCCATCTAAGGCTAAATACGTCCACGAGTCCGATAGCAAACAAG
TACCGTGAGGGAAAGTTGAAAAGAACTTTGAAGAGAGAGTTCAAGAGTACGTGAAACCGC
TTAGAGGCAAACGGATGGACCCGCAATGGGTCGGCCCGGGGGATTCAACCGGTGCGTCGG
GACGCGCGGGGGATGCGGAGCTGTAAAGCCCGTGCCTTCGCGTGGTCTCCGGGCGGACCG
GTGCACTTTCCTCGGGTCGACGGCCACGACCGGCTCTCCGCGGCCACAAGCCTGTCGCTG
GGAAGGTGACCCCGCGCCGCGGCGTTACAGCCCAGCCAGTTCGTTGAGCTCGTCGGAGGG
CCGAGGTTGCCGCTTCTCGTCACCCTCGCCATCCTTGCTCGTCACGACCGGGGCGGACTG
GTCGGTCAGTGCTCTCCCGACCGCGAGCGTAGGAAGGGCGGGTACGGTGCGAGATGCTTC
GGGCCGGTGGCGAATCGGTCGGTCCTCCATCCGACC
>ICH_00638_Y_paiensis
NNNNTTTATATTTATTGTTTGCTTTATGGTCTGGATTGATTGGGTTAGCTTTGAGGCTTT
TGATTCGGGCTGAATTAGGGCAACCTGGAAGGTTGCTTGGTGATGATCAGCTTTATAATG
TGATTGTGACTGCTCATGCTTTTATGATGATTTTTTTCTTGGTAATGCCTATAATAATTG
GGGGTTTCGGTAATTGATTAATTCCGTTAATGATTGGGGCACCTGATATGGCTTTCCCTC
GCTTAAATAATTTGAGGTTTTGGTTACTTGTGCCGGCTCTTTTTTTGTTGTTGAGATCCT
CGCTTGTAGAGAGTGGAGTTGGAACAGGTTGGACTGTGTATCCACCTTTGTCAGGTAATG
TAGCTCATTCTGGTGCTTCGGTGGATTTGGCTATTTTTTCTTTACATCTTGCTGGTGCTT
CTTCTATTCTAGGAGCTATTAATTTTATTTCTACTGTAGGTAATATGCGTTCTCCTGGGT
TAGTTGCTGAGCGAATTCCTTTATTTGTGTGGGCTGTTACGGTAACAGCCATTTTGTTAG
TGGCTGCGTTACCTGTGTTAGCTGGGGCTATTACTATGCTACTTACTGATCGTAATTTAA
ATACGTCTTTTTTTGATCCTACTGGGGGTGGAGATCCAATTTTGTATATACATTTGTTTN
TCGTCTTCTGTA-AATT-TAATAAAAGATAATGCCTGCCCAGTGAATTTAAACGGCCGCG
TTAGCGTGAGCGTGATAAGGTAGCGTAATAATTAGCCTCTTAATTGGAGGCCAGTGAAAG
GCAACACGAGGAACACCTATACTTTGAAAAAAACTTTTCTTCTAAGTGAAAAGCCTTAGA
TATTAAAGAAGACGAAAAGACCCCGCGGAACTTTACCTTCTCTTTATAACCGCAAATAAC
TATACTAAGGTTTGATTGGGGCAATCTCGGAACCGCCTAAACTTCCGATCTACACCCAAC
CAATCTAAAATTCGTTTCGGACTAAAAAGAAGTTACCCCGGGGATAACAGCGTTATCCAA
CTTAAGAGTACACATCGAAAGTTGGGTTTGCGACCTCGATGTTGGCTTAAGGACATCCAC
ATATGTGCAGCCGCTATGAATGGATAGTCTGTTCGACTATTATAACCTTATAAGCGGAGG
AAAAGAAACTAACAAGGATTCCCCTAGTAACGGCGAGTGAAGAGGGAAAAGCCCAGCACC
GAATCCCACAGCCTTGCGCTGTCGGGAACTGTGGTGTATAGGAAGCCTACCTGTCGGCGC
GTTCGGGTGCCCAAGTCCTCCTGATCGTGGCCTCTCCCACAGCGGGTGTCAGGCCCGTAG
AGGCACTCGACGTTGCCGGCTCGGAGCTTCCTCGGAGTCGGGTTGTTTGGGAATGCAGCC
CAAAGGGGTGGTAAACTCCATCTAAGGCTAAATACGTCCACGAGTCCGATAGCAAACAAG
TACCGTGAGGGAAAGTTGAAAAGAACTTTGAAGAGAGAGTTCAAGAGTACGTGAAACCGC
TTAGAGGCAAACGGATGGACCCGCAATGGGTCGGCCCGGGGGATTCAACCGGTGCGTCGG
GACGCGCGGGGGATGCGGAGCTGTAAAGCCCGTGCCTTCGCGTGGTCTCCGGGCGGACCG
GTGCACTTTCCTCGGGTCGACGGCCACGACCGGCTCTCCGCGGCCACAAGCCTGTCGCTG
GGAAGGTGACCCCGCGCCGCGGCGTTACAGCCCAGCCAGTTCGTTGAGCTCGTCGGAGGG
CCGAGGTTGCCGCTTCTCGTCACCCTCGCCATCCTTGCTCGTCACGACCGGGGCGGACTG
GTCGGTCAGTGCTCTCCCGACCGCGAGCGTAGGAAGGGCGGGTACGGTGCGAGACGCTTC
GGGCCGGTGGCGAATCGGTCGGTCCNNNNNNNNNNN
>ICH_00639_Y_paiensis
NNNNTTTATATTTATTGTTTGCTTTATGGTCTGGATTGATTGGGTTAGCTTTGAGGCTTT
TGATTCGGGCTGAATTAGGGCAACCTGGAAGGTTGCTTGGTGATGATCAGCTTTATAATG
TGATTGTGACTGCTCATGCTTTTATGATGATTTTTTTCTTGGTAATGCCTATAATAATTG
GGGGTTTCGGTAATTGATTAATTCCGTTAATGATTGGGGCACCTGATATGGCTTTCCCTC
GCTTAAATAATTTGAGGTTTTGGTTACTTGTGCCGGCTCTTTTTTTGTTGTTGAGATCCT
CGCTTGTAGAGAGTGGAGTTGGAACAGGTTGGACTGTGTATCCACCTTTGTCAGGTAATG
TAGCTCATTCTGGTGCTTCGGTGGATTTGGCTATTTTTTCTTTACATCTTGCTGGTGCTT
CTTCTATTCTAGGAGCTATTAATTTTATTTCTACTGTAGGTAATATGCGTTCTCCTGGGT
TAGTTGCTGAGCGAATTCCTTTATTTGTGTGGGCTGTTACGGTAACAGCCATTTTGTTAG
TGGCTGCGTTACCTGTGTTAGCTGGGGCTATTACTATGCTACTTACTGATCGTAATTTAA
ATACGTCTTTTTTTGATCCTACTGGGGGTGGAGATCCAATTTTGTATATACATTTGTTTN
TCGTCTTCTGTA-AATT-TAATAAAAGATAATGCCTGCCCAGTGAATTTAAACGGCCGCG
TTAGCGTGAGCGTGATAAGGTAGCGTAATAATTAGCCTCTTAATTGGAGGCCAGTGAAAG
GCAACACGAGGAACACCTATACTTTGAAAAAAACTTTTCTTCTAAGTGAAAAGCCTTAGA
TATTAAAGAAGACGAAAAGACCCCGCGGAACTTTACCTTCTCTTTATAACCGCAAATAAC
TATACTAAGGTTTGATTGGGGCAATCTCGGAACCGCCTAAACTTCCGATCTACACCCAAC
CAATCTAAAATTCGTTTCGGACTAAAAAGAAGTTACCCCGGGGATAACAGCGTTATCCAA
CTTAAGAGTACACATCGAAAGTTGGGTTTGCGACCTCGATGTTGGCTTAAGGACATCCAC
ATATGTGCAGCCGCTATGAATGGATAGTCTGTTCGACTATTATAACCTTATAAGCGGAGG
AAAAGAAACTAACAAGGATTCCCCTAGTAACGGCGAGTGAAGAGGGAAAAGCCCAGCACC
GAATCCCACAGCCTTGCGCTGTCGGGAACTGTGGTGTATAGGAAGCCTACCTGTCGGCGC
GTTCGGGTGCCCAAGTCCTCCTGATCGTGGCCTCTCCCACAGCGGGTGTCAGGCCCGTAG
AGGCACTCGACGTTGCCGGCTCGGAGCTTCCTCGGAGTCGGGTTGTTTGGGAATGCAGCC
CAAAGGGGTGGTAAACTCCATCTAAGGCTAAATACGTCCACGAGTCCGATAGCAAACAAG
TACCGTGAGGGAAAGTTGAAAAGAACTTTGAAGAGAGAGTTCAAGAGTACGTGAAACCGC
TTAGAGGCAAACGGATGGACCCGCAATGGGTCGGCCCGGGGGATTCAACCGGTGCGTCGG
GACGCGCGGGGGATGCGGAGCTGTAAAGCCCGTGCCTTCGCGTGGTCTCCGGGCGGACCG
GTGCACTTTCCTCGGGTCGACGGCCACGACCGGCTCTCCGCGGCCACAAGCCTGTCGCTG
GGAAGGTGACCCCGCGCCGCGGCGTTACAGCCCAGCCAGTTCGTTGAGCTCGTCGGAGGG
CCGAGGTTGCCGCTTCTCGTCACCCTCGCCATCCTTGCTCGTCACGACCGGGGCGGACTG
GTCGGTCAGTGCTCTCCCGACCGCGAGCGTAGGAAGGGCGGGTACGGTGCGAGATGCTTC
GGGCCGGTGGCGAATCGGTCGGTCCTCCNNNNNNNN
>ICH_00640_Y_paiensis
NNNNTTTATATTTATTGTTTGCTTTATGGTCTGGATTGATTGGGTTAGCTTTGAGGCTTT
TGATTCGGGCTGAATTAGGGCAACCTGGAAGGTTGCTTGGTGATGATCAGCTTTATAATG
TGATTGTGACTGCTCATGCTTTTATGATGATTTTTTTCTTGGTAATGCCTATAATAATTG
GGGGTTTCGGTAATTGATTAATTCCGTTAATGATTGGGGCACCTGATATGGCTTTCCCTC
GCTTAAATAATTTGAGGTTTTGGTTACTTGTGCCGGCTCTTTTTTTGTTGTTGAGATCCT
CGCTTGTAGAGAGTGGAGTTGGAACAGGTTGGACTGTGTATCCACCTTTGTCAGGTAATG
TAGCTCATTCTGGTGCTTCGGTGGATTTGGCTATTTTTTCTTTACATCTTGCTGGTGCTT
CTTCTATTCTAGGAGCTATTAATTTTATTTCTACTGTAGGTAATATGCGTTCTCCTGGGT
TAGTTGCTGAGCGAATTCCTTTATTTGTGTGGGCTGTTACGGTAACAGCCATTTTGTTAG
TGGCTGCGTTACCTGTGTTAGCTGGGGCTATTACTATGCTACTTACTGATCGTAATTTAA
ATACGTCTTTTTTTGATCCTACTGGGGGTGGAGATCCAATTTTGTATATACATTTGTTTN
NNNNNNNNNNNNNNNNNNNNNNNNNNNNNNNNNNNNNNNNNNNNNNNNNNNNNNNNNNNN
NNNNNNNNNNNNNNNNNNNNNNNNNNNNNNNNNNNNNNNNNNNNNNNNNNNNNNNNNNNN
NNNNNNNNNNNNNNNNNNNNNNNNNNNNNNNNNNNNNNNNNNNNNNNNNNNNNNNNNNNN
NNNNNNNNNNNNNNNNNNNNNNNNNNNNNNNNNNNNNNNNNNNNNNNNNNNNNNNNNNNN
NNNNNNNNNNNNNNNNNNNNNNNNNNNNNNNNNNNNNNNNNNNNNNNNNNNNNNNNNNNN
NNNNNNNNNNNNNNNNNNNNNNNNNNNNNNNNNNNNNNNNNNNNNNNNNNNNNNNNNNNN
NNNNNNNNNNNNNNNNNNNNNNNNNNNNNNNNNNNNNNNNNNNNNNNNNNNNNNNNNNNN
NNNNNNNNNNNNNNNNNNNNNNNNNNNNNNNNNNNNNNNNNNNNNNNNNNNNNNNNNNNN
NNNNNNNNNNNNNNNNNNNNNNNNNNNNNNNNNNNNNNNNNNNNNNNNNNNNNNNNNNNN
NNNNNNNNNNNNNNNNNNNNNNNNNNNNNNNNNNNNNNNNNNNNNNNNNNNNNNNNNNNN
NNNNNNNNNNNNNNNNNNNNNNNNNNNNNNNNNNNNNNNNNNNNNNNNNNNNNNNNNNNN
NNNNNNNNNNNNNNNNNNNNNNNNNNNNNNNNNNNNNNNNNNNNNNNNNNNNNNNNNNNN
NNNNNNNNNNNNNNNNNNNNNNNNNNNNNNNNNNNNNNNNNNNNNNNNNNNNNNNNNNNN
NNNNNNNNNNNNNNNNNNNNNNNNNNNNNNNNNNNNNNNNNNNNNNNNNNNNNNNNNNNN
NNNNNNNNNNNNNNNNNNNNNNNNNNNNNNNNNNNNNNNNNNNNNNNNNNNNNNNNNNNN
NNNNNNNNNNNNNNNNNNNNNNNNNNNNNNNNNNNNNNNNNNNNNNNNNNNNNNNNNNNN
NNNNNNNNNNNNNNNNNNNNNNNNNNNNNNNNNNNNNNNNNNNNNNNNNNNNNNNNNNNN
NNNNNNNNNNNNNNNNNNNNNNNNNNNNNNNNNNNNNNNNNNNNNNNNNNNNNNNNNNNN
NNNNNNNNNNNNNNNNNNNNNNNNNNNNNNNNNNNNNNNNNNNNNNNNNNNNNNNNNNNN
NNNNNNNNNNNNNNNNNNNNNNNNNNNNNNNNNNNNNNNNNNNNNNNNNNNNNNNNNNNN
NNNNNNNNNNNNNNNNNNNNNNNNNNNNNNNNNNNN
>144_14_Y nesemanni
GTACGTTATACTTAGTGTTTGCTTTGTGGTCTGGATTGATTGGATTAGCTTTGAGTCTTT
TGATTCGTGCTGAGTTAGGGCAGCCTGGAAGGTTGCTTGGTGACGATCAGCTTTATAATG
TGATTGTGACTGCTCATGCTTTTATAATGATTTTCTTTTTGGTAATGCCTATGATGATTG
GGGGTTTTGGTAATTGGTTGATTCCGCTAATGATTGGGGCACCTGATATGGCTTTTCCTC
GATTAAATAATTTGAGGTTTTGGTTACTTGTGCCGGCTCTTTTTTTGTTGTTGAGGTCTT
CACTTGTAGAGAGTGGGGTTGGAACAGGTTGGACTGTGTATCCGCCTTTATCAGGTAATG
TAGCTCATTCTGGTGCCTCGGTGGATTTGGCTATTTTTTCTTTACATCTTGCTGGTGCTT
CTTCCATTTTGGGGGCTATTAATTTTATTTCTACTGTAGGGAATATGCGCTCTCCTGGGT
TAGTCGCTGAGCGAATTCCTTTGTTTGTGTGGGCTGTTACGGTAACAGCTATTTTGTTAG
TGGCTGCGTTGCCTGTATTGGCTGGTGCTATTACTATGTTGCTTACTGATCGTAATTTGA
ATACGTCTTTTTTTGACCCTACTGGTGGGGGAGATCCAATTTTATATATGCATTTATTTT
TCGTCTTTTGTA-AATT-TAATAAAAGATAATGCCTGCCCAGTGAATTTAAACGGCCGCG
TTAGCGTGAGCGTGCTAAGGTAGCGTAATAATTAGCCTCTTAATTGGAGGCCAGTGAAAG
GCAACACGAGGAACACCTATACTTTAAAAAAAACTTTCCTTCTAAGTGAAAAGCCTTAGA
TACTAAAGAAGACGAAAAGACCCCGCGGAACTTTACCTTTTCTTTATAATTATAAATAAA
TATACTAAGGTTTGATTGGGGCAATCTCGGAACCGCCTAAACTTCCGACCTACATACAGA
CAATCTAAAATTTGTTTCAGACCAAAAAGAAGTTACCCCGGGGATAACAGCGTTATCCAA
CTTAAGAGTACACATCGAAAGTTGGGTTTGCGACCTCGATGTTGGCTTAAGGACATCCAC
ATAAGTGCAGCCGCTATGAATGGATAGTCTGTTCGACTATTATAACCTTATAAGCGGAGG
AAAAGAAACTAACAAGGATTCCCCTAGTAACGGCGAGTGAAGAGGGAAAAGCCCAGCACC
GAATCCCACAGCCTTGCGCTGTCGGGAACTGTGGTGTATAGGAAGTCTACTTGTCGGCGC
GTTCGGGTGCCCAAGTCCTCCTGATCGTGGCCTCGCCCACAGCGGGTGTCAGGCCCGTAG
AGGCACTCGACGTTGCCGGCTCGGAGCTTCCTCGGAGTCGGGTTGTTTGGGAATGCAGCC
CAAAGGGGTGGTAAACTCCATCTAAGGCTAAATACGTCCACGAGTCCGATAGCAAACAAG
TACCGTGAGGGAAAGTTGAAAAGAACTTTGAAGAGAGAGTTCAAGAGTACGTGAAACCGC
TTAGAGGCAAACGGATGGACCCGCAATGGGTCGGCCCGGGGGATTCAACCGGTGCGTCGG
GACGCGCGGGGGATGCGGAGCTGTAAAGCCCGTGCCTTCGCGTGGTCTCCGGGCGGACCG
GTGCACTTTCCTCGGGTCGACGGCCACGACCGGCTCTCCGCGGCCACAAGCCTGTCGCTG
GGAAGGTGACCCCGCGCCGCGGCGTTACAGCCCAGCCAGTTCGTTGAGCTCGTCGGAGGG
CCGAGGTTGCCGCTTCTCGTCACCCTCGCCATCCTTGCTCGTCACGACCGGGGCGGACTG
GTCGGTCAGTGCTCTCCCGACCGCGAGCGTAGGAAGGGCGGGTACGGTGCGAGATGCTTC
GGGCCGGTGGCGAATCGGTCGGTCCTNNNNNNNNNN
>144_25_Y nesemanni
GTACGTTATACTTAGTGTTTGCTTTGTGGTCTGGATTGATTGGATTAGCTTTGAGTCTTT
TGATTCGTGCTGAGTTAGGGCAGCCTGGAAGGTTGCTTGGTGACGATCAGCTTTATAATG
TGATTGTGACTGCTCATGCTTTTATAATGATTTTCTTTTTGGTAATGCCTATGATGATTG
GGGGTTTTGGTAATTGGTTGATTCCGCTAATGATTGGGGCACCTGATATGGCTTTTCCTC
GATTAAATAATTTGAGGTTTTGGTTACTTGTGCCGGCTCTTTTTTTGTTGTTGAGGTCTT
CACTTGTAGAGAGTGGGGTTGGAACAGGTTGGACTGTGTATCCGCCTTTATCAGGTAATG
TAGCTCATTCTGGTGCCTCGGTGGATTTGGCTATTTTTTCTTTACATCTTGCTGGTGCTT
CTTCCATTTTGGGGGCTATTAATTTTATTTCTACTGTAGGGAATATGCGCTCTCCTGGGT
TAGTCGCTGAGCGAATTCCTTTGTTTGTGTGGGCTGTTACGGTAACAGCTATTTTGTTAG
TGGCTGCGTTGCCTGTATTGGCTGGTGCTATTACTATGTTGCTTACTGATCGTAATTTGA
ATACGTCTTTTTTTGACCCTACTGGTGGGGGAGATCCAATTTTATATATGCATTTATTTT
TCGTCTTTTGTA-AATT-TAATAAAAGATAATGCCTGCCCAGTGAATTTAAACGGCCGCG
TTAGCGTGAGCGTGCTAAGGTAGCGTAATAATTAGCCTCTTAATTGGAGGCCAGTGAAAG
GCAACACGAGGAACACCTATACTTTAAAAAAAACTTTCCTTCTAAGTGAAAAGCCTTAGA
TACTAAAGAAGACGAAAAGACCCCGCGGAACTTTACCTTTTCTTTATAATTATAAATAAA
TATACTAAGGTTTGATTGGGGCAATCTCGGAACCGCCTAAACTTCCGACCTACATACAGA
CAATCTAAAATTTGTTTCAGACCAAAAAGAAGTTACCCCGGGGATAACAGCGTTATCCAA
CTTAAGAGTACACATCGAAAGTTGGGTTTGCGACCTCGATGTTGGCTTAAGGACATCCAC
ATAAGTGCAGCCGCTATGAATGGATAGTCTGTTCGACTATTATAACCTTATAAGCGGAGG
AAAAGAAACTAACAAGGATTCCCCTAGTAACGGCGAGTGAAGAGGGAAAAGCCCAGCACC
GAATCCCACAGCCTTGCGCTGTCGGGAACTGTGGTGTATAGGAAGTCTACTTGTCGGCGC
GTTCGGGTGCCCAAGTCCTCCTGATCGTGGCCTCGCCCACAGCGGGTGTCAGGCCCGTAG
AGGCACTCGACGTTGCCGGCTCGGAGCTTCCTCGGAGTCGGGTTGTTTGGGAATGCAGCC
CAAAGGGGTGGTAAACTCCATCTAAGGCTAAATACGTCCACGAGTCCGATAGCAAACAAG
TACCGTGAGGGAAAGTTGAAAAGAACTTTGAAGAGAGAGTTCAAGAGTACGTGAAACCGC
TTAGAGGCAAACGGATGGACCCGCAATGGGTCGGCCCGGGGGATTCAACCGGTGCGTCGG
GACGCGCGGGGGATGCGGAGCTGTAAAGCCCGTGCCTTCGCGTGGTCTCCGGGCGGACCG
GTGCACTTTCCTCGGGTCGACGGCCACGACCGGCTCTCCGCGGCCACAAGCCTGTCGCTG
GGAAGGTGACCCCGCGCCGCGGCGTTACAGCCCAGCCAGTTCGTTGAGCTCGTCGGAGGG
CCGAGGTTGCCGCTTCTCGTCACCCTCGCCATCCTTGCTCGTCACGACCGGGGCGGACTG
GTCGGTCAGTGCTCTCCCGACCGCGAGCGTAGGAAGGGCGGGTACGGTGCGAGATGCTTC
GGGCCGGTGGCGAATCGGTCGGTCCTCCNNNNNNNN
>144_19_Y nesemanni
GTACGTTATACTTAGTGTTTGCTTTGTGGTCTGGATTGATTGGATTAGCTTTGAGTCTTT
TGATTCGTGCTGAGTTAGGGCAGCCTGGAAGGTTGCTTGGTGACGATCAGCTTTATAATG
TGATTGTGACTGCTCATGCTTTTATAATGATTTTCTTTTTGGTAATGCCTATGATGATTG
GGGGTTTCGGTAATTGGTTGATTCCGCTAATGATTGGGGCACCTGATATGGCTTTTCCTC
GATTAAATAATTTGAGGTTTTGGTTGCTTGTGCCGGCTCTTTTTTTGTTGTTGAGGTCTT
CACTTGTAGAGAGTGGGGTTGGAACAGGTTGGACTGTGTATCCACCTTTATCAGGTAATG
TGGCTCATTCTGGTGCCTCGGTGGATTTGGCTATTTTTTCTTTACATCTTGCTGGTGCTT
CTTCCATTTTGGGGGCTATTAATTTTATCTCTACTGTAGGGAATATGCGCTCTCCTGGGT
TAGTCGCTGAGCGAATTCCTTTGTTTGTGTGGGCTGTTACGGTAACAGCTATTTTGTTAG
TGGCTGCGTTGCCTGTATTGGCTGGTGCTATTACTATGTTGCTTACTGATCGTAATCTGA
ATACGTCTTTTTTTGACCCTACTGGTGGGGGAGATCCAATTTTATATATGCATTTATTTT
TCGTCTTTTGTA-AATT-TAATAAAAGATAATGCCTGCCCAGTGAATTTAAACGGCCGCG
TTAGCGTGAGCGTGCTAAGGTAGCGTAATAATTAGCCTCTTAATTGGAGGCCAGTGAAAG
GCAACACGAGGAACACCTATACTTTAAAAAAAACTTTTCTTCTAAGCGAAAAGCCTTAGA
TACTAAAGAAGACGAAAAGACCCCGCGGAACTTTACCTTTTCTTTATAACTATAAATAAA
TATACTAAGGTTTGATTGGGGCAATCTCGGAACCGCCTAAACTTCCGACCTACATACAAA
CAATCTAAAATTTGTTTCAGACCAAAAAGAAGTTACCCCGGGGATAACAGCGTTATCCAA
CTTAAGAGTACACATCGAAAGTTGGGTTTGCGACCTCGATGTTGGCTTAAGGACATCCAC
ATAAGTGCAGCCGCTATGAATGGATAGTCTGTTCGACTATTATAACCTTATAAGCGGAGG
AAAAGAAACTAACAAGGATTCCCCTAGTAACGGCGAGTGAAGAGGGAAAAGCCCAGCACC
GAATCCCACAGCCTTGCGCTGTCGGGAACTGTGGTGTATAGGAAGTCTACTTGTCGGCGC
GTTCGGGTGCCCAAGTCCTCCTGATCGTGGCCTCGCCCACAGCGGGTGTCAGGCCCGTAG
AGGCACTCGACGTTGCCGGCTCGGAGCTTCCTCGGAGTCGGGTTGTTTGGGAATGCAGCC
CAAAGGGGTGGTAAACTCCATCTAAGGCTAAATACGTCCACGAGTCCGATAGCAAACAAG
TACCGTGAGGGAAAGTTGAAAAGAACTTTGAAGAGAGAGTTCAAGAGTACGTGAAACCGC
TTAGAGGCAAACGGATGGACCCGCAATGGGTCGGCCCGGGGGATTCAACCGGTGCGTCGG
GACGCGCGGGGGATGCGGAGCTGTAAAGCCCGTGCCTTCGCGTGGTCTCCGGGCGGACCG
GTGCACTTTCCTCGGGTCGACGGCCACGACCGGCTCTCCGCGGCCACAAGCCTGTCGCTG
GGAAGGTGACCCCGCGCCGCGGCGTTACAGCCCAGCCAGTTCGTTGAGCTCGTCGGAGGG
CCGAGGTTGCCGCTTCTCGTCACCCTCGCCATCCTTGCTCGTCACGACCGGGGCGGACTG
GTCGGTCAGTGCTCTCCCGACCGCGAGCGTAGGAAGGGCGGGTACGGTGCGAGATGCTTC
GGGCCGGTGGCGAATCGGTCGGTCCTCCNNNNNNNN
>138_4_Y_panhai
GTACGTTATATTTAGTGTTTGCTTTGTGGTCTGGGTTGATTGGGTTAGCTTTGAGGCTTT
TAATTCGTGCTGAGTTAGGGCAACCTGGAAGGTTGCTTGGTGATGATCAGCTTTATAATG
TGATTGTGACTGCTCATGCTTTTATGATAATTTTTTTCTTGGTAATGCCTATAATAATCG
GGGGTTTTGGTAATTGGTTAATTCCCTTAATAATTGGGGCACCTGACATGGCTTTTCCTC
GATTAAATAATTTAAGGTTTTGGTTGCTTGTGCCGGCTCTTTTTTTGCTGTTGAGTTCTT
CCCTTGTAGAGAATGGGGTTGGAACAGGTTGGACTGTGTATCCACCTTTATCGGGTAATG
TGGCTCATTCAGGTGCTTCGGTGGATTTGGCTATTTTTTCTTTGCACCTTGCTGGTGCTT
CTTCCATTTTGGGGGCTATTAATTTTATTTCTACTGTAGGAAATATGCGCTCTCCTGGGT
TAGTTGCTGAGCGAATTCCTTTATTTGTGTGGGCTGTTACAGTAACAGCTATTTTGTTAG
TGGCTGCGTTGCCTGTGCTGGCTGGGGCTATTACCATATTACTTACTGATCGTAATTTAA
ATACGTCTTTTTTTGATCCTACTGGTGGGGGAGATCCAATTTTATATATGCATTTGTTTT
TCGTCTTTTGTA-AATT-TAATAAAAGATAATGCCTGCCCAGTGAATTTAAACGGCCGCG
TTAGCGTGAGCGTGCTAAGGTAGCGTAATAATTAGCCTCTTAATTGGAGGCCAGTGAAAG
GCAACACGAGGAACACCTATACTTTAAAAAAAACTTTTCTTCTAAGTGAAAAGCCTTAGA
TATTAAAGAAGACGAAAAGACCCCGCGGAACTTTACCTTTTCTTTATAACTACAAATAAA
TATACTAAGGTTTGATTGGGGCAATCTCGGAACCACCTAAACTTCCGACCTGTATACAGC
CAATATAAAATTTGCTTCGGACCAAAAAGAAGTTACCCCGGGGATAACAGCGTTATCCAA
CTTAAGAGTACACATCGAAAGTTGGGTTTGCGACCTCGATGTTGGCTTAAGGACATCCAC
ATAAGTGCAGCCGCTATGAATGGATAGTCTGTTCGACTATTATAACCTTATAAGCGGAGG
AAAAGAAACTAACAAGGATTCCCCTAGTAACGGCGAGTGAAGAGGGAAAAGCCCAGCACC
GAATCCCACAGCCTTGCGCTGTCGGGAACTGTGGTGTATAGGAAGTCTACTTGTCGGCGC
GTTCGGGTGCCCAAGTCCTCCTGATCGTGGCCTCGCCCACAGCGGGTGTCAGGCCCGTAG
AGGCACTCGACGTTGCCGGCTCGGAGCTTCCTCGGAGTCGGGTTGTTTGGGAATGCAGCC
CAAAGGGGTGGTAAACTCCATCTAAGGCTAAATACGTCCACGAGTCCGATAGCAAACAAG
TACCGTGAGGGAAAGTTGAAAAGAACTTTGAAGAGAGAGTTCAAGAGTACGTGAAACCGC
TTAGAGGCAAACGGATGGACCCGCAATGGGTCGGCCCGGGGGATTCAACCGGTGCGTCGG
GACGCGCGGGGGATGCGGAGCTGTAAAGCCCGTGCCTTCGCGTGGTCTCCGGGCGGACCG
GTGCACTTTCCTCGGGTCGACGGCCACGACCGGCTCTCCGCGGCCACAAGCCTGTCGCTG
GGAAGGTGACCCCGCGCCGCGGCGTTACAGCCCAGCCAGTTCGTTGAGCTCGTCGGAGGG
CCGAGGTTGCCGCTTCTCGTCACCCTCGCCATCCTTGCTCGTCACGACCGGGGCGGACTG
GTCGGTCAGTGCTCTCCCGACCGCGAGCGTAGGAAGGGCGGGTACGGTGCGAGATGCTTC
GGGCCGGTGGCGAATCGGTCGGTCCTNNNNNNNNNN
>138_12_Y_panhai
GTACGTTATATTTAGTGTTTGCTTTGTGGTCTGGGTTGATTGGGTTAGCTTTGAGGCTTT
TAATTCGTGCTGAGTTAGGGCAACCTGGAAGGTTGCTTGGTGATGATCAGCTTTATAATG
TGATTGTGACTGCTCATGCTTTTATGATAATTTTTTTCTTGGTAATGCCTATAATAATCG
GGGGTTTTGGTAATTGGTTAATTCCCTTAATAATTGGGGCACCTGACATGGCTTTTCCTC
GATTAAATAATTTAAGGTTTTGGTTGCTTGTGCCGGCTCTTTTTTTGCTGTTGAGTTCTT
CCCTTGTAGAGAGTGGGGTTGGAACAGGTTGGACTGTGTATCCACCTTTATCGGGTAATG
TGGCTCATTCAGGTGCTTCGGTGGATTTGGCTATTTTTTCTTTGCACCTTGCTGGTGCTT
CTTCCATTTTGGGGGCTATTAATTTTATTTCTACTGTAGGAAATATGCGCTCTCCTGGGT
TAGTTGCTGAGCGAATTCCTTTATTTGTGTGGGCTGTTACAGTAACAGCTATTTTGTTAG
TGGCTGCGTTGCCTGTGCTGGCTGGGGCTATTACCATATTACTTACTGATCGTAATTTAA
ATACGTCTTTTTTTGATCCTACTGGTGGGGGAGATCCAATTTTATATATGCATTTGTTTT
TCGTCTTTTGTA-AATT-TAATAAAAGATAATGCCTGCCCAGTGAATTTAAACGGCCGCG
TTAGCGTGAGCGTGCTAAGGTAGCGTAATAATTAGCCTCTTAATTGGAGGCCAGTGAAAG
GCAACACGAGGAACACCTATACTTTAAAAAAAACTTTTCTTCTAAGTGAAAAGCCTTAGA
TATTAAAGAAGACGAAAAGACCCCGCGGAACTTTACCTTTTCTTTATAACTACAAATAAA
TATACTAAGGTTTGATTGGGGCAATCTCGGAACCACCTAAACTTCCGACCTGTATACAGC
CAATATAAAATTTGCTTCGGACCAAAAAGAAGTTACCCCGGGGATAACAGCGTTATCCAA
CTTAAGAGTACACATCGAAAGTTGGGTTTGCGACCTCGATGTTGGCTTAAGGACATCCAC
ATAAGTGCAGCCGCTATGAATGGATAGTCTGTTCGACTATTATAACCTTATAAGCGGAGG
AAAAGAAACTAACAAGGATTCCCCTAGTAACGGCGAGTGAAGAGGGAAAAGCCCAGCACC
GAATCCCACAGCCTTGCGCTGTCGGGAACTGTGGTGTATAGGAAGTCTACTTGTCGGCGC
GTTCGGGTGCCCAAGTCCTCCTGATCGTGGCCTCGCCCACAGCGGGTGTCAGGCCCGTAG
AGGCACTCGACGTTGCCGGCTCGGAGCTTCCTCGGAGTCGGGTTGTTTGGGAATGCAGCC
CAAAGGGGTGGTAAACTCCATCTAAGGCTAAATACGTCCACGAGTCCGATAGCAAACAAG
TACCGTGAGGGAAAGTTGAAAAGAACTTTGAAGAGAGAGTTCAAGAGTACGTGAAACCGC
TTAGAGGCAAACGGATGGACCCGCAATGGGTCGGCCCGGGGGATTCAACCGGTGCGTCGG
GACGCGCGGGGGATGCGGAGCTGTAAAGCCCGTGCCTTCGCGTGGTCTCCGGGCGGACCG
GTGCACTTTCCTCGGGTCGACGGCCACGACCGGCTCTCCGCGGCCACAAGCCTGTCGCTG
GGAAGGTGACCCCGCGCCGCGGCGTTACAGCCCAGCCAGTTCGTTGAGCTCGTCGGAGGG
CCGAGGTTGCCGCTTCTCGTCACCCTCGCCATCCTTGCTCGTCACGACCGGGGCGGACTG
GTCGGTCAGTGCTCTCCCGACCGCGAGCGTAGGAAGGGCGGGTACGGTGCGAGATGCTTC
GGGCCGGTGGCGAATCGGTCGGTCCTNNNNNNNNNN
>114_1_Y_inlenensis
GTACTTTATATTTATTGTTTGCTTTGTGGTCTGGGTTGATTGGGTTAGCTTTGAGGCTTT
TGATCCGGGCTGAATTGGGGCAACCTGGAAGGTTGCTTGGTGATGATCAGCTTTATAATG
TGATTGTGACTGCTCATGCTTTTATGATGATTTTTTTCTTGGTAATGCCTATAATAATTG
GGGGTTTTGGTAATTGGTTAATTCCATTAATGATTGGGGCACCTGATATGGCTTTCCCTC
GCTTAAATAATTTGAGGTTTTGGTTACTTGTGCCGGCTCTTTTTTTGTTGTTGAGGTCCT
CACTTGTAGAGAGTGGGGTTGGAACAGGTTGGACTGTGTACCCCCCTTTGTCAGGTAATG
TAGCTCATTCTGGTGCTTCGGTGGATTTGGCTATTTTTTCTTTACATCTTGCTGGTGCTT
CTTCTATTTTAGGAGCTATTAATTTTATTTCTACTGTAGGAAATATGCGTTCTCCTGGGT
TGGTTGCTGAGCGAATTCCTTTATTTGTGTGGGCTGTTACGGTAACAGCTATTTTGTTAG
TGGCTGCGTTACCTGTGTTAGCTGGGGCTATTACTATATTACTTACTGATCGCAATTTAA
ATACGTCTTTTTTTGATCCTACTGGGGGGGGAGATCCGATTTTGTATATACATTTGTTTT
TCGTCTTCTGTA-AATT-TAATAAAAGATAATGCCTGCCCAGTGAATTTAAACGGCCGCG
TTAGCGTGAGCGTGCTAAGGTAGCGTAATAATTAGCCTCTTAATTGGAGGCCAGTGAAAG
GCAACACGAGGAACACCTATACTTTGAAAAAAACTTTTCTTCTAAGTGAAAAGCCTTAGA
TATTAAAGAAGACGAAAAGACCCCGCGGAACTTTACCTTCTCTCTATAACTACAAATAAC
TATCCTAAGGTTTGATTGGGGCAATCTCGGAACCACCTAAACTTCCGATCTACATCCAAC
CAATCTAAAATTTGTTTCGGACTAAAAAGAAGTTACCCCGGGGATAACAGCGTTATCCAA
CTTAAGAGTACACATCGAAAGTTGGGTTTGCGACCTCGATGTTGGCTTAAGGACATCCAC
ATAAGTGCAGCCGCTATGAGTGGATAGTCTGTTCGACTATTATAACCTTATAAGCGGAGG
AAAAGAAACTAACAAGGATTCCCCTAGTAACGGCGAGTGAAGAGGGAAAAGCCCAGCACC
GAATCCCACAGCCTTGCGCTGTCGGGAACTGTGGTGTATAGGAAGCCTACTTGTCGGCGC
GTTCGGGTGCCCAAGTCCTCCTGATCGTGGCCTCTCCCACAGCGGGTGTCAGGCCCGTAG
AGGCACTCGACGTTGCCGGCTCGGAGCTTCCTCGGAGTCGGGTTGTTTGGGAATGCAGCC
CAAAGGGGTGGTAAACTCCATCTAAGGCTAAATACGTCCACGAGTCCGATAGCAAACAAG
TACCGTGAGGGAAAGTTGAAAAGAACTTTGAAGAGAGAGTTCAAGAGTACGTGAAACCGC
TTAGAGGCAAACGGATGGACCCGCAATGGGTCGGCCCGGGGGATTCAACCGGTGCGTCGG
GACGCGCGGGGGATGCGGAGCTGTAAAGCCCGTGCCTTCGCGTGGTCTCCGGGCGGACCG
GTGCACTTTCCTCGGGTCGACGGCCACGACCGGCTCTCCGCGGCCACAAGCCTGTCGCTG
GGAAGGTGACCCCGCGCCGCGGCGTTACAGCCCAGCCAGTTCGTTGAGCTCGTCGGAGGG
CCGAGGTTGCCGCTTCTCGTCACCCTCGCCATCCTTGCTCGTCACGACCGGGGCGGACTG
GTCGGTCAGTGCTCTCCCGACCGCGAGCGTAGGAAGGGCGGGTACGGTGCGAGATGCTTC
GGGCCGGTGGCGAATCGGTCGGTCCTCNNNNNNNNN
>140_24_Y_inlenensis
GTACTTTATATTTATTGTTTGCTTTGTGGTCTGGGTTGATTGGGTTAGCTTTGAGGCTTT
TGATCCGGGCTGAATTGGGGCAACCTGGAAGGTTGCTTGGTGATGATCAGCTTTATAATG
TGATTGTGACTGCTCATGCTTTTATGATGATCTTTTTCTTGGTAATACCTATAATAATTG
GGGGTTTTGGTAATTGGTTAATTCCATTAATGATTGGGGCACCTGATATGGCTTTCCCTC
GCTTAAATAATTTGAGGTTTTGGTTACTTGTGCCGGCTCTTTTTTTGTTGTTGAGGTCCT
CACTTGTAGAGAGTGGGGTTGGAACAGGTTGGACTGTGTACCCCCCTTTGTCAGGTAATG
TAGCTCATTCTGGTGCTTCGGTGGATTTGGCTATTTTTTCTTTACATCTTGCTGGTGCTT
CTTCTATTTTAGGAGCTATTAATTTTATTTCTACTGTAGGAAATATGCGTTCTCCTGGGT
TGGTTGCTGAGCGAATTCCTTTATTTGTGTGGGCTGTTACGGTAACAGCTATTTTGTTAG
TGGCTGCGTTACCTGTGTTAGCTGGGGCTATTACTATATTACTTACTGATCGCAATTTAA
ATACGTCTTTTTTTGATCCTACTGGGGGGGGAGATCCGATTTTGTATATACATTTGTTTT
TCGTCTTCTGTA-AATT-TAATAAAAGATAATGCCTGCCCAGTGAATTTAAACGGCCGCG
TTAGCGTGAGCGTGCTAAGGTAGCGTAATAATTAGCCTCTTAATTGGAGGCCAGTGAAAG
GCAACACGAGGAACACCTATACTTTGAAAAAAACTTTTCTTCTAAGTGAAAAGCCTTAGA
TATTAAAGAAGACGAAAAGACCCCGCGGAACTTTACCTTCTCTCTATAACTACAAATAAC
TATCCTAAGGTTTGATTGGGGCAATCTCGGAACCACCTAAACTTCCGATCTACATCCAAC
CAATCTAAAATTTGTTTCGGACTAAAAAGAAGTTACCCCGGGGATAACAGCGTTATCCAA
CTTAAGAGTACACATCGAAAGTTGGGTTTGCGACCTCGATGTTGGCTTAAGGACATCCAC
ATAAGTGCAGCCGCTATGAGTGGATAGTCTGTTCGACTATTATAACCTTATAAGCGGAGG
AAAAGAAACTAACAAGGATTCCCCTAGTAACGGCGAGTGAAGAGGGAAAAGCCCAGCACC
GAATCCCACAGCCTTGCGCTGTCGGGAACTGTGGTGTATAGGAAGCCTACTTGTCGGCGC
GTTCGGGTGCCCAAGTCCTCCTGATCGTGGCCTCTCCCACAGCGGGTGTCAGGCCCGTAG
AGGCACTCGACGTTGCCGGCTCGGAGCTTCCTCGGAGTCGGGTTGTTTGGGAATGCAGCC
CAAAGGGGTGGTAAACTCCATCTAAGGCTAAATACGTCCACGAGTCCGATAGCAAACAAG
TACCGTGAGGGAAAGTTGAAAAGAACTTTGAAGAGAGAGTTCAAGAGTACGTGAAACCGC
TTAGAGGCAAACGGATGGACCCGCAATGGGTCGGCCCGGGGGATTCAACCGGTGCGTCGG
GACGCGCGGGGGATGCGGAGCTGTAAAGCCCGTGCCTTCGCGTGGTCTCCGGGCGGACCG
GTGCACTTTCCTCGGGTCGACGGCCACGACCGGCTCTCCGCGGCCACAAGCCTGTCGCTG
GGAAGGTGACCCCGCGCCGCGGCGTTACAGCCCAGCCAGTTCGTTGAGCTCGTCGGAGGG
CCGAGGTTGCCGCTTCTCGTCACCCTCGCCATCCTTGCTCGTCACGACCGGGGCGGACTG
GTCGGTCAGTGCTCTCCCGACCGCGAGCGTAGGAAGGGCGGGTACGGTGCGAGATGCTTC
GGGCCGGTGGCGAATCGGTCGGTCCTNNNNNNNNNN
>916_1_Y_rectangularis
GTACGTTATATTTAGTGTTTGCTTTGTGGTCTGGATTGATTGGATTAGCTTTGAGTCTTT
TGATTCGTGCTGAGTTAGGGCAACCTGGAAGGTTGCTTGGTGACGATCAGCTTTATAATG
TGATTGTGACTGCCCATGCTTTTATAATGATTTTCTTCTTGGTAATGCCTATGATGATTG
GGGGTTTTGGTAATTGATTGATTCCCCTAATGATTGGGGCACCTGATATGGCTTTTCCTC
GATTAAATAATTTGAGGTTTTGGTTGCTTGTGCCGGCTCTTTTTTTGCTGTTGAGGTCTT
CACTTGTAGAGAGTGGGGTTGGAACAGGTTGGACTGTGTATCCACCTTTATCGGGTAATG
TGGCTCATTCTGGTGCTTCGGTGGATTTGGCTATTTTTTCTTTACATCTTGCTGGTGCTT
CTTCCATTTTGGGGGCTATTAATTTTATCTCTACTGTGGGGAATATGCGCTCTCCTGGGT
TAGTTGCTGAGCGAATTCCTTTGTTTGTGTGGGCTGTTACGGTAACAGCTATTTTGTTAG
TGGCTGCGTTGCCTGTATTGGCTGGTGCTATTACTATGTTGCTTACTGATCGTAATTTAA
ACACGTCTTTTTTTGATCCTACTGGTGGGGGAGATCCGATTTTATATATGCATTTGTTTT
NNNNNNNNNNNNNNNNNNNNNNNNNNNNNNNNNNNNNNNNNNNNNNNNNNNNNNNNNNNN
NNNNNNNNNNNNNNNNNNNNNNNNNNNNNNNNNNNNNNNNNNNNNNNNNNNNNNNNNNNN
NNNNNNNNNNNNNNNNNNNNNNNNNNNNNNNNNNNNNNNNNNNNNNNNNNNNNNNNNNNN
NNNNNNNNNNNNNNNNNNNNNNNNNNNNNNNNNNNNNNNNNNNNNNNNNNNNNNNNNNNN
NNNNNNNNNNNNNNNNNNNNNNNNNNNNNNNNNNNNNNNNNNNNNNNNNNNNNNNNNNNN
NNNNNNNNNNNNNNNNNNNNNNNNNNNNNNNNNNNNNNNNNNNNNNNNNNNNNNNNNNNN
NNNNNNNNNNNNNNNNNNNNNNNNNNNNNNNNNNNNNNNNNNNNNNNNNNNNNNNNNNNN
NNNNNNNNNNNNNNNNNNNNNNNNNNNNNNNNNNNNNNNNNNNNNNNNNNTAAGCGGAGG
AAAAGAAACTAACAAGGATTCCCCTAGTAACGGCGAGTGAAGAGGGAAAAGCCCAGCACC
GAATCCCACAGCCTTGCGCTGTCGGGAACTGTGGTGTATAGGAAGCCTACTTGTCGGCGC
GTTCGGGTGCCCAAGTCCTCCTGATCGTGGCCTCTCCCACAGCGGGTGTCAGGCCCGTAG
AGGCACTCGACGTTGCCGGCTCGGAGCTTCCTCGGAGTCGGGTTGTTTGGGAATGCAGCC
CAAAGGGGTGGTAAACTCCATCTAAGGCTAAATACGTCCACGAGTCCGATAGCAAACAAG
TACCGTGAGGGAAAGTTGAAAAGAACTTTGAAGAGAGAGTTCAAGAGTACGTGAAACCGC
TTAGAGGCAAACGGATGGACCCGCAATGGGTCGGCCCGGGGGATTCAACCGGTGCGTCGG
GACGCGCGGGGGATGCGGAGCTGTAAAGCCCGTGCCTTCGCGTGGTCTCCGGGCGGACCG
GTGCACTTTCCTCGGGTCGACGGCCACGACCGGCTCTCCGCGGCCACAAGCCTGTCGCTG
GGAAGGTGACCCCGCGCCGCGGCGTTACAGCCCAGCCAGTTCGTTGAGCTCGTCGGAGGG
CCGAGGTTGCCGCTTCTCGTCACCCTCGCCATCCTTGCTCGTCACGACCGGGGCGGACTG
GTCGGTCAGTGCTCTCCCGACCGCGAGCGTAGGAAGGGCGGGTACGGTGCGAGATGCTTC
GGGCCGGTGGCGAATCGGTCGGTCCTCCATCCGACC
>111_2_Y_rectangularis
GTACGTTATATTTAGTGTTTGCTTTGTGGTCTGGATTGATTGGATTAGCTTTGAGTCTTT
TGATTCGTGCTGAGTTAGGGCAGCCTGGAAGGTTGCTTGGTGACGATCAGCTTTATAATG
TGATTGTGACTGCTCATGCTTTTATAATGATTTTCTTCTTGGTAATGCCTATGATGATTG
GAGGTTTTGGTAATTGGTTGATTCCCCTAATGATTGGGGCACCTGATATGGCTTTTCCTC
GATTAAATAATTTGAGGTTTTGGTTGCTTGTGCCGGCTCTTTTTTTGCTGTTGAGGTCTT
CACTTGTAGAGAGTGGGGTTGGAACAGGTTGGACTGTGTATCCACCTTTATCGGGTAATG
TGGCTCATTCTGGTGCTTCGGTGGATTTGGCTATTTTTTCTTTACATCTTGCTGGTGCTT
CTTCCATTTTGGGGGCTATTAATTTTATCTCTACTGTGGGGAATATGCGCTCTCCTGGGT
TAGTTGCTGAGCGAATTCCTTTGTTTGTGTGGGCTGTTACGGTAACAGCTATTTTGTTAG
TGGCTGCGTTGCCTGTATTGGCTGGTGCTATTACTATGTTGCTTACTGATCGTAATCTAA
ACACGTCTTTTTTTGATCCTACTGGTGGGGGAGATCCGATTTTATATATGCATTTGTTTT
TCGTCTTTTGTA-AATT-TAATAAAAGATAATGCCTGCCCAGTGAATTTAAACGGCCGCG
TTAGCGTGAGCGTGCTAAGGTAGCGTAATAATTAGCCTCTTAATTGGAGGCCAGTGAAAG
GCAACACGAGGAACACCTATACTTTAAAAAAAACTTTTCTTCTAAGTGAAAAGCCTTAGA
TATTAAAGAAGACGAAAAGACCCCGCGGAACTTTACCTTTTCTTTATAACTATAAATAAG
TATACTAAGGTTTGATTGGGGCAATCTCGGAACCACCTAAACTTCCGACCTACATACAGA
CAATCTAAAATTTGTTTCAGACCAAAAAGAAGTTACCCCGGGGATAACAGCGTTATCCAA
CTTGAGAGTACACATCGAAAGTTGGGTTTGCGACCTCGATGTTGGCTTAAGGACATCCAC
ATAAGCGCAGCCGCTATGAATGGATAGTCTGTTCGACTANNNNNNNNNNNTAAGCGGAGG
AAAAGAAACTAACAAGGATTCCCCTAGTAACGGCGAGTGAAGAGGGAAAAGCCCAGCACC
GAATCCCACAGCCTTGCGCTGTCGGGAACTGTGGTGTATAGGAAGCCTACTTGTCGGCGC
GTTCGGGTGCCCAAGTCCTCCTGATCGTGGCCTCTCCCACAGCGGGTGTCAGGCCCGTAG
AGGCACTCGACGTTGCCGGCTCGGAGCTTCCTCGGAGTCGGGTTGTTTGGGAATGCAGCC
CAAAGGGGTGGTAAACTCCATCTAAGGCTAAATACGTCCACGAGTCCGATAGCAAACAAG
TACCGTGAGGGAAAGTTGAAAAGAACTTTGAAGAGAGAGTTCAAGAGTACGTGAAACCGC
TTAGAGGCAAACGGATGGACCCGCAATGGGTCGGCCCGGGGGATTCAACCGGTGCGTCGG
GACGCGCGGGGGATGCGGAGCTGTAAAGCCCGTGCCTTCGCGTGGTCTCCGGGCGGACCG
GTGCACTTTCCTCGGGTCGACGGCCACGACCGGCTCTCCGCGGCCACAAGCCTGTCGCTG
GGAAGGTGACCCCGCGCCGCGGCGTTACAGCCCAGCCAGTTCGTTGAGCTCGTCGGAGGG
CCGAGGTTGCCGCTTCTCGTCACCCTCGCCATCCTTGCTCGTCACGACCGGGGCGGACTG
GTCGGTCAGTGCTCTCCCGACCGCGAGCGTAGGAAGGGCGGGTACGGTGCGAGATGCTTC
GGGCCGGTGGCGAATCGGTCGGTCCTCCNNNNNNNN
>102_7_Y_rectangularis
GTACGTTATATTTAGTGTTTGCTTTGTGGTCTGGATTGATTGGATTAGCTTTGAGTCTTT
TGATTCGTGCTGAGTTAGGGCAGCCTGGAAGGTTGCTTGGTGACGATCAGCTTTATAATG
TGATTGTGACTGCTCATGCCTTTATAATGATTTTCTTCTTGGTAATGCCTATGATGATTG
GGGGTTTTGGTAATTGGTTGATTCCCCTAATGATTGGGGCACCTGATATGGCTTTTCCTC
GATTAAATAATTTGAGGTTTTGGTTGCTTGTGCCGGCTCTTTTTTTGTTGTTGAGGTCTT
CACTTGTAGAGAGTGGGGTTGGAACAGGTTGGACTGTGTATCCACCTTTATCTGGTAATG
TGGCTCATTCTGGTGCTTCGGTGGATTTGGCTATTTTTTCTTTACATCTTGCTGGTGCTT
CTTCCATTTTGGGGGCTATTAATTTTATCTCTACTGTGGGGAATATGCGCTCTCCTGGGT
TAGTTGCTGAGCGAATTCCTTTGTTTGTGTGGGCTGTTACCGTAACAGCTATTTTGTTAG
TGGCTGCGTTGCCTGTATTGGCTGGTGCTATTACTATGTTGCTTACTGATCGTAATCTAA
ACACGTCTTTTTTTGATCCTACTGGTGGGGGAGATCCGATTTTATATATGCATTTGTTTT
TCGTCTTTTGTA-AATT-TAATAAAAGATAATGCCTGCCCAGTGAATTTAAACGGCCGCG
TTAGCGTGAGCGTGCTAAGGTAGCGTAATAATTAGCCTCTTAATTGGAGGCCAGTGAAAG
GCAACACGAGGAACACCTATACTTTAAAAAAAACTTTTCTTCTAAGTGAAAAGCCTTAGA
TATTAAAGAAGACGAAAAGACCCCGCGGAACTTTACCTTTTCTTTATAACTATAAATAAG
TATACTAAGGTTTGATTGGGGCAATCTCGGAACCACCTAAACTTCCGACCTACATACAGA
CAATCTAAAATTTGTTTCAGACCAAAAAGAAGTTACCCCGGGGATAACAGCGTTATCCAA
CTTGAGAGTACACATCGAAAGTTGGGTTTGCGACCTCGATGTTGGCTTAAGGACATCCAC
ATAAGTGCAGCCGCTATGAATGGATAGTCTGTTCGACTATTATACCCTTATAAGCGGAGG
AAAAGAAACTAACAAGGATTCCCCTAGTAACGGCGAGTGAAGAGGGAAAAGCCCAGCACC
GAATCCCACAGCCTTGCGCTGTCGGGAACTGTGGTGTATAGGAAGCCTACTTGTCGGCGC
GTTCGGGTGCCCAAGTCCTCCTGATCGTGGCCTCTCCCACAGCGGGTGTCAGGCCCGTAG
AGGCACTCGACGTTGCCGGCTCGGAGCTTCCTCGGAGTCGGGTTGTTTGGGAATGCAGCC
CAAAGGGGTGGTAAACTCCATCTAAGGCTAAATACGTCCACGAGTCCGATAGCAAACAAG
TACCGTGAGGGAAAGTTGAAAAGAACTTTGAAGAGAGAGTTCAAGAGTACGTGAAACCGC
TTAGAGGCAAACGGATGGACCCGCAATGGGTCGGCCCGGGGGATTCAACCGGTGCGTCGG
GACGCGCGGGGGATGCGGAGCTGTAAAGCCCGTGCCTTCGCGTGGTCTCCGGGCGGACCG
GTGCACTTTCCTCGGGTCGACGGCCACGACCGGCTCTCCGCGGCCACAAGCCTGTCGCTG
GGAAGGTGACCCCGCGCCGCGGCGTTACAGCCCAGCCAGTTCGTTGAGCTCGTCGGAGGG
CCGAGGTTGCCGCTTCTCGTCACCCTCGCCATCCTTGCTCGTCACGACCGGGGCGGACTG
GTCGGTCAGTGCTCTCCCGACCGCGAGCGTAGGAAGGGCGGGTACGGTGCGAGATGCTTC
GGGCCGGTGGCGAATCGGTCGGTCCTCCNNNNNNNN
>346_2_Y_elongatula
GTACGCTATACTTACTATTTGCTTTGTGGTCTGGTTTGATTGGGTTAGCCTTGAGCCTTT
TGATTCGGGCGGAGTTAGGGCAACCTGGAAGGTTACTTGGTGATGATCAGCTTTATAATG
TGATTGTGACTGCTCATGCTTTTATGATGATTTTTTTCTTGGTAATACCTATGATAATTG
GCGGTTTTGGTAACTGGTTAATTCCTCTAATGATTGGGGCACCTGATATGGCTTTTCCTC
GGTTAAACAATTTGAGGTTTTGGTTACTTGTGCCAGCTCTTTTTTTGTTGTTGAGATCTT
CTCTTGTAGAGAGTGGGGCTGGAACAGGTTGGACTGTCTATCCGCCTTTATCTGGTAATG
TGGCCCATTCTGGTGCTTCGGTGGATTTAGCTATTTTTTCTTTGCATCTTGCTGGTGCTT
CTTCAATTTTAGGGGCTATTAACTTTATTTCTACTGTAGGGAATATGCGCTCTCCTGGGT
TAGTTGCTGAGCGAATTCCTTTATTCGTGTGGGCTGTTACAGTAACAGCTATTTTGTTGG
TAGCTGCGTTGCCTGTATTAGCTGGGGCTATTACTATGTTACTTACGGATCGTAATTTAA
ATACGTCTTTTTTTGACCCTACTGGGGGAGGAGATCCTATTTTGTATATACATTTGTTTT
TCGTCTTCTGTA-AATT-TAATAAAAGATAATGCCTGCCCAGTGAATTTAAACGGCCGCG
TTAGCGTGAGCGTGCTAAGGTAGCGTAATAATTAGCCTCTTAATTGGAGGCCAGTGAAAG
GCAACACGAGGAACACCTATACTTTAAAAAAAACTTTTCTTCTAAGTGAAAAGCCTTAGA
TACTAAAGAAGACGAAAAGACCCCGCGGAACTTTACCTTTTCTTTATGAATATAAATAAA
TATACTGAGGTTTGATTGGGGCAATCTCGGAACCACCTAAACTTCCGACCTACATCCAAC
CAATATAAAATCTGTTTTGGACCAAAAAGAAGTTACCCCGGGGATAACAGCGTTATCCAA
CTTAAGAGTACACATCGAAAGTTGGGTTTGCGACCTCGATGTTGGCTTAAGGACATCCAC
ATAAGTGCAGCCGCTATGAATGGACAGTCTGTTCGACTATTATAACCTTATAAGCGGAGG
AAAAGAAACTAACAAGGATTCCCCTAGTAACGGCGAGTGAAGAGGGAAAAGCCCAGCACC
GAATCCCACAGCCTTGCGCTGTCGGGAACTGTGGTGTATAGGAAGCCTACTTGTCGGCGC
GTTCGGGTGCCCAAGTCCTCCTGATCGTGGCCTCTCCCACAGCGGGTGTCAGGCCCGTAG
AGGCACTCGACGTGGTCGGCTCGGAGCTTCCTCGGAGTCGGGTTGTTTGGGAATGCAGCC
CAAAGGGGTGGTAAACTCCATCTAAGGCTAAATACGTCCACGAGTCCGATAGCAAACAAG
TACCGTGAGGGAAAGTTGAAAAGAACTTTGAAGAGAGAGTTCAAGAGTACGTGAAACCGC
TTAGAGGCAAACGGATGGACCCGCAATGGGTCGGCCCGGGGGATTCAACCGGTGCGTCGG
GACGCGCGGGGGATGCGGAGCTGTAAAGCCCGTGCCTTCGCGTGGTCACCGGGCGGACCG
GTGCACTTTCCTCGGGTCGACGGCCACGACCGGCTCTCCGCGGCCACAAGCCWGTCGCTG
GGAAGGTGACCCCGCGCCGCGGCGTTAGAGCCCAGCCAGTTCGTTGAGCTCGTCGGAGGG
CCGAGGTTGCCGCTTCTCGTCACCCTCGCCATCCTTGCTCGTCACGACCGGGGCGGACTG
GTCGGTCAGTGCTCTCCCGACCGCGAGCGTAGGAAGGGCGGGTACGGTGCGAGATGCTTC
GGGCCGGTGGCGAATCGGTCGGTCCTCCATCCGACC
>346_3_Y_elongatula
GTACGCTATACTTACTATTTGCTTTGTGGTCTGGTTTGATTGGGTTAGCCTTGAGCCTTT
TGATTCGGGCGGAGTTAGGGCAACCTGGAAGGTTACTTGGTGATGATCAGCTTTATAATG
TGATTGTGACTGCTCATGCTTTTATGATGATTTTTTTCTTGGTAATACCTATGATAATTG
GCGGTTTTGGTAACTGGTTAATTCCTCTAATGATTGGGGCACCTGATATGGCTTTTCCTC
GGTTAAACAATTTGAGGTTTTGGTTACTTGTGCCAGCTCTTTTTTTGTTGTTGAGATCTT
CTCTTGTAGAGAGTGGGGCTGGAACAGGTTGGACTGTCTATCCGCCTTTATCTGGTAATG
TGGCCCATTCTGGTGCTTCGGTGGATTTAGCTATTTTTTCTTTGCATCTTGCTGGTGCTT
CTTCAATTTTAGGGGCTATTAACTTTATTTCTACTGTAGGGAATATGCGCTCTCCTGGGT
TAGTTGCTGAGCGAATTCCTTTATTCGTGTGGGCTGTTACAGTAACAGCTATTTTGTTGG
TAGCTGCGTTGCCTGTATTAGCTGGGGCTATTACTATGTTACTTACGGATCGTAATTTAA
ATACGTCTTTTTTTGACCCTACTGGGGGAGGAGATCCTATTTTGTACATACATTTGTTTT
NNNNNNNNNNNNNNNNNNNNNNNNNNNNNNNNNNNNNNNNNNNNNNNNNNNNNNNNNNNN
NNNNNNNNNNNNNNNNNNNNNNNNNNNNNNNNNAGCCTTTTAATTGCAGGCCAGTGAAAG
GCAACACGAGGAACACCTATACTTTAAAAAAAACTTTTCTTCTAAGTGAAAAGCCTTAGA
TGCTAAAGAAGACGAAAAGACCCCGCGGAACTTTACCTTTTCTTTATGAATATAAATAAA
TATACTGAGGTTTGATTGGGGCAATCTCGGAACCACCTAAACTTCCGACCTACATCCAAC
CAATATAAAATCTGTTTTGGACCAAAAAGAAGTTACCCCGGGGATAACAGCGTTATCCAA
CTTAAGAGTACACATCGAAAGTTGGGTTTGCGACCTCGATGTTGGCTTAAGGACATCCAC
ATAAGTGCAGCCGCTATGAATGGACAGTCTGTTCGACTATTATAACCTTATAAGCGGAGG
AAAAGAAACTAACAAGGATTCCCCTAGTAACGGCGAGTGAAGAGGGAAAAGCCCAGCACC
GAATCCCACAGCCTTGCGCTGTCGGGAACTGTGGTGTATAGGAAGCCTACTTGTCGGCGC
GTTCGGGTGCCCAAGTCCTCCTGATCGTGGCCTCTCCCACAGCGGGTGTCAGGCCCGTAG
AGGCACTCGACGTGGTCGGCTCGGAGCTTCCTCGGAGTCGGGTTGTTTGGGAATGCAGCC
CAAAGGGGTGGTAAACTCCATCTAAGGCTAAATACGTCCACGAGTCCGATAGCAAACAAG
TACCGTGAGGGAAAGTTGAAAAGAACTTTGAAGAGAGAGTTCAAGAGTACGTGAAACCGC
TTAGAGGCAAACGGATGGACCCGCAATGGGTCGGCCCGGGGGATTCAACCGGTGCGTCGG
GACGCGCGGGGGATGCGGAGCTGTAAAGCCCGTGCCTTCGCGTGGTCACCGGGCGGACCG
GTGCACTTTCCTCGGGTCGACGGCCACGACCGGCTCTCCGCGGCCACAAGCCTGTCGCTG
GGAAGGTGACCCCGCGCCGCGGCGTTAGAGCCCAGCCAGTTCGTTGAGCTCGTCGGAGGG
CCGAGGTTGCCGCTTCTCGTCACCCTCGCCATCCTTGCTCGTCACGACCGGGGCGGACTG
GTCGGTCAGTGCTCTCCCGACCGCGAGCGTAGGAAGGGCGGGTACGGTGCGAGATGCTTC
GGGCCGGTGGCGAATCGGTCGGTCCTCCATCCGACC
>341_2_Y_elongatula
GTACGCTATACTTACTATTTGCTTTGTGGTCTGGTTTGATTGGGTTAGCCTTGAGCCTTT
TGATTCGGGCGGAGTTAGGGCAACCTGGAAGGTTACTTGGTGATGATCAGCTTTATAATG
TGATTGTGACTGCTCATGCTTTTATGATGATTTTTTTCTTGGTAATACCTATGATAATTG
GCGGTTTTGGTAACTGGTTAATTCCTCTAATGATTGGGGCACCTGATATGGCTTTTCCTC
GGTTAAACAATTTGAGGTTTTGGTTACTTGTGCCAGCTCTTTTTTTGTTGTTGAGATCTT
CTCTTGTAGAGAGTGGGGCTGGAACAGGTTGGACTGTCTATCCGCCTTTATCTGGTAATG
TGGCCCATTCTGGTGCTTCGGTGGATTTAGCTATTTTTTCTTTGCATCTTGCTGGTGCTT
CTTCAATTTTAGGGGCTATTAACTTTATTTCTACTGTAGGGAATATGCGCTCTCCTGGGT
TAGTTGCTGAGCGAATTCCTTTATTCGTGTGGGCTGTTACAGTAACAGCTATTTTGTTGG
TAGCTGCGTTGCCTGTGTTAGCTGGGGCTATTACTATGTTACTTACGGATCGTAATTTAA
ATACGTCTTTTTTTGACCCTACTGGGGGAGGAGATCCTATTTTGTACATACATTTGTTTT
NNNNNNNNNNNNNNNNNNNNNNNNNNNNNNNNNNNNNNNNNNNNNNNNNNNNNNNNNNNN
NNNNNNNNNNNNNNNNNNNNNNNNNNNNNNNNNAGCCTTTTAATTGCAGGCCAGTGAAAG
GCAACACGAGGAACACCTATACTTTAAAAAAAACTTTTCTTCTAAGTGAAAAGCCTTAGA
TACTAAAGAAGACGAAAAGACCCCGCGGAACTTTACCTTTTCTTTATGAATATAAATAAA
TATACTGAGGTTTGATTGGGGCAATCTCGGAACCGCCTAAACTTCCGACCTACATCCAAC
CAATATAAAATCTGTTTTGGACCAAAAAGAAGTTACCCCGGGGATAACAGCGTTATCCAA
CTTAAGAGTACACATCGAAAGTTGGGTTTGCGACCTCGATGTTGGCTTAAGGACATCCAC
ATAAGTGCAGCCGCTATGAATGGACAGTCTGTTCGACTATTATAACCTTATAAGCGGAGG
AAAAGAAACTAACAAGGATTCCCCTAGTAACGGCGAGTGAAGAGGGAAAAGCCCAGCACC
GAATCCCACAGCCTTGCGCTGTCGGGAACTGTGGTGTATAGGAAGCCTACTTGTCGGCGC
GTTCGGGTGCCCAAGTCCTCCTGATCGTGGCCTCTCCCACAGCGGGTGTCAGGCCCGTAG
AGGCACTCGACGTGGTCGGCTCGGAGCTTCCTCGGAGTCGGGTTGTTTGGGAATGCAGCC
CAAAGGGGTGGTAAACTCCATCTAAGGCTAAATACGTCCACGAGTCCGATAGCAAACAAG
TACCGTGAGGGAAAGTTGAAAAGAACTTTGAAGAGAGAGTTCAAGAGTACGTGAAACCGC
TTAGAGGCAAACGGATGGACCCGCAATGGGTCGGCCCGGGGGATTCAACCGGTGCGTCGG
GACGCGCGGGGGATGCGGAGCTGTAAAGCCCGTGCCTTCGCGTGGTCACCGGGCGGACCG
GTGCACTTTCCTCGGGTCGACGGCCACGACCGGCTCTCCGCGGCCACAAGCCTGTCGCTG
GGAAGGTGACCCCGCGCCGCGGCGTTAGAGCCCAGCCAGTTCGTTGAGCTCGTCGGAGGG
CCGAGGTTGCCGCTTCTCGTCACCCTCGCCATCCTTGCTCGTCACGACCGGGGCGGACTG
GTCGGTCAGTGCTCTCCCGACCGCGAGCGTAGGAAGGGCGGGTACGGTGCGAGATGCTTC
GGGCCGGTGGCGAATCGGTCGGTCCTCCATCCGACC
>666_1_Y_baniensis
GTACGCTATACTTATTGTTTGCTTTGTGGTCTGGCTTGATTGGGTTAGCCTTGAGCCTTT
TGATTCGGGCGGAGTTAGGGCAACCTGGAAGGTTACTTGGGGACGATCAGCTTTATAATG
TGATTGTGACTGCTCATGCTTTTATGATGATTTTTTTCCTGGTAATGCCAATAATAATTG
GGGGTTTTGGTAATTGGTTAATTCCTTTAATGATTGGGGCACCTGATATGGCTTTCCCTC
GACTAAATAATTTGAGGTTTTGATTACTTGTGCCAGCTCTTTTTTTGTTATTGAGGTCTT
CTCTTGTAGAGAGTGGGGCTGGAACAGGTTGGACTGTATATCCGCCATTATCGGGTAATG
TGGCCCATTCTGGTGCTTCGGTGGATTTAGCTATTTTTTCTTTACATCTTGCTGGTGCTT
CTTCAATTTTAGGGGCTATTAATTTTATTTCTACTGTAGGGAATATGCGTTCTCCTGGGT
TAGTTGCTGAGCGAATTCCTTTATTTGTGTGGGCTGTTACAGTAACAGCTATTTTGCTGG
TGGCTGCGTTGCCTGTGTTAGCTGGGGCTATTACTATGCTACTTACTGATCGTAATTTAA
ATACGTCTTTTTTTGACCCTACTGGTGGAGGAGACCCTATTTTGTATATACATTTGTTTT
NNNNNNNNNNNNNNNNNNNNNNNNNNNNNNNNNNNNNNNNNNNNNNNNNNNNNNNNNNNN
NNNNNNNNNGCGTGCTAAGGTAGCGTAATAATTAGCCTCTTAATTGGAGGCCAGTGAAAG
GCAACACGAGGAACACCTATACTTTAAAAAAAACTTTTCTTCTAAGTGAAAAGCCTTAGA
TATTAAAGAAGACGAAAAGACCCCGCGGAACTTTACCTTTTCTTTATGACTATAAATAAG
TATACTGAGGTTTGATTGGGGCAATCTCGGAACCACCTAAACTTCCGA-CTTACTCCAAC
CAATATAAAATCTGTTTTGGACCAAAAAGAAGTTACCCCGGGGATAACAGCGTTATCCAA
CTTAAGAGTACACATCGAAAGTTGGGTTTGCGACCTCGATGTTGGCTTAAGGACATCCAC
ATAAGTGCAGCCGCTATGATTGGATAGTCTGTTCGACTATTATAACCTTATAAGCGGAGG
AAAAGAAACTAACAAGGATTCCCCTAGTAACGGCGAGTGAAGAGGGAAAAGCCCAGCACC
GAATCCCACAGCCTTGCGCTGTCGGGAACTGTGGTGTATAGGAAGCCTACTTGTCGGCGC
GTTCGGGTGCCCAAGTCCTCCTGATCGTGGCCTCTCCCACAGCGGGTGTCAGGCCCGTAG
AGGCACTCGACGTGGCCGGCTCGGAGCTTCCTCGGAGTCGGGTTGTTTGGGAATGCAGCC
CAAAGGGGTGGTAAACTCCATCTAAGGCTAAATACGTCCACGAGTCCGATAGCAAACAAG
TACCGTGAGGGAAAGTTGAAAAGAACTTTGAAGAGAGAGTTCAAGAGTACGTGAAACCGC
TTAGAGGCAAACGGATGGACCCGCAATGGGTCGGCCCGGGGGATTCAACCGGTGCGTCGG
GACGCGCGGGGGATGCGGAGCTGTAAAGCCCGTGCCTTCGCGTGGTCTCCGGGCGGACCG
GTGCACTTTCCTCGGGTCGACGGCCACGACCGGCTCTCCGCGGCCACAAGCCTGTCGCTG
GGAAGGTGACCCCGCGCCGCGGCGTTACAGCCCAGCCAGTTCGTTGAGCTCGTCGGAGGG
CCGAGGTTGCCGCTTCTCGTCACCCTCGCCATCCTTGCTCGTCACGACCGGGGCGGACTG
GTCGGTCAGTGCTCTCCCGACCGCGAGCGTAGGAAGGGCGGGTACGGTGCGAGATGCTTC
GGGCCGGTGGCGAATCGGTCGGTCCTCCATCCGACC
>139_7_Y_inlenensis
GTACTTTATATTTATTGTTTGCTTTGTGGTCTGGGTTGATTGGGTTAGCTTTGAGGCTTT
TGATCCGGGCTGAATTGGGGCAACCTGGAAGGTTGCTTGGTGATGATCAGCTTTATAATG
TGATTGTGACTGCTCATGCTTTTATGATGATTTTTTTCTTGGTAATGCCTATAATAATTG
GGGGTTTTGGTAATTGGTTAATTCCGTTAATGATTGGGGCACCTGATATGGCTTTCCCTC
GCTTAAATAATTTGAGGTTTTGGTTACTTGTGCCGGCTCTTTTTTTGTTGTTGAGGTCCT
CACTTGTAGAGAGTGGGGTTGGAACAGGTTGGACTGTGTACCCCCCTTTGTCAGGTAATG
TAGCTCATTCTGGTGCTTCGGTGGATTTGGCTATTTTTTCTTTACATCTTGCTGGTGCTT
CTTCTATTTTAGGAGCTATTAATTTTATTTCTACTGTAGGAAATATGCGTTCTCCTGGGT
TGGTTGCTGAGCGAATTCCTTTATTTGTGTGGGCTGTTACGGTAACAGCTATTTTGTTAG
TGGCTGCGTTACCTGTGTTAGCTGGGGCTATTACTATATTACTTACTGATCGCAATTTAA
ATACGTCTTTTTTTGATCCTACTGGGGGGGGAGATCCGATTTTGTATATACATTTGTTTT
TCGTCTTCTGTA-AATT-TAATAAAAGATAATGCCTGCCCAGTGAATTTAAACGGCCGCG
TTAGCGTGAGCGTGCTAAGGTAGCGTAATAATTAGCCTCTTAATTGGAGGCCAGTGAAAG
GCAACACGAGGAACACCTATACTTTGAAAAAAACTTTTCTTCTAAGTGAAAAGCCTTAGA
TATTAAAGAAGACGAAAAGACCCCGCGGAACTTTACCTTCTCTCTATAACTACAAATAAC
TATCCTAAGGTTTGATTGGGGCAATCTCGGAACCACCTAAACTTCCGATCTACATCCAAC
CAATCTAAAATTTGTTTCGGACTAAAAAGAAGTTACCCCGGGGATAACAGCGTTATCCAA
CTTAAGAGTACACATCGAAAGTTGGGTTTGCGACCTCGATGTTGGCTTAAGGACATCCAC
ATAAGTGCAGCCGCTATGAGTGGATAGTCTGTTCGACTATTATAACCTTATAAGCGGAGG
AAAAGAAACTAACAAGGATTCCCCTAGTAACGGCGAGTGAAGAGGGAAAAGCCCAGCACC
GAATCCCACAGCCTTGCGCTGTCGGGAACTGTGGTGTATAGGAAGCCTACTTGTCGGCGC
GTTCGGGTGCCCAAGTCCTCCTGATCGTGGCCTCTCCCACAGCGGGTGTCAGGCCCGTAG
AGGCACTCGACGTTGCCGGCTCGGAGCTTCCTCGGAGTCGGGTTGTTTGGGAATGCAGCC
CAAAGGGGTGGTAAACTCCATCTAAGGCTAAATACGTCCACGAGTCCGATAGCAAACAAG
TACCGTGAGGGAAAGTTGAAAAGAACTTTGAAGAGAGAGTTCAAGAGTACGTGAAACCGC
TTAGAGGCAAACGGATGGACCCGCAATGGGTCGGCCCGGGGGATTCAACCGGTGCGTCGG
GACGCGCGGGGGATGCGGAGCTGTAAAGCCCGTGCCTTCGCGTGGTCTCCGGGCGGACCG
GTGCACTTTCCTCGGGTCGACGGCCACGACCGGCTCTCCGCGGCCACAAGCCTGTCGCTG
GGAAGGTGACCCCGCGCCGCGGCGTTACAGCCCAGCCAGTTCGTTGAGCTCGTCGGAGGG
CCGAGGTTGCCGCTTCTCGTCACCCTCGCCATCCTTGCTCGTCACGACCGGGGCGGACTG
GTCGGTCAGTGCTCTCCCGACCGCGAGCGTAGGAAGGGCGGGTACGGTGCGAGATGCTTC
GGGCCGGTGGCGAATCGGTCGGTCCTNNNNNNNNNN
>680_1_Y_avaensis
GTACTTTATATTTATTGTTTGCTTTGTGGTCTGGATTGATTGGATTAGCTTTGAGGCTTT
TGATTCGGGCTGAATTAGGGCAACCTGGAAGGTTGCTTGGTGATGATCAGCTTTATAATG
TGATTGTGACTGCTCATGCTTTTATGATGATTTTTTTCTTGGTAATGCCTATAATAATTG
GGGGTTTTGGTAATTGATTAATTCCCCTAATGATTGGGGCACCTGATATGGCTTTCCCTC
GCTTAAATAATTTGAGGTTTTGGTTACTTGTGCCGGCTCTTTTTTTGTTGTTGAGGTCCT
CACTTGTAGAGAGTGGAGTTGGAACAGGTTGGACTGTGTATCCACCTTTGTCAGGTAATG
TAGCACATTCTGGTGCTTCGGTGGATTTGGCTATTTTTTCTTTACATCTTGCTGGTGCTT
CTTCTATTCTAGGAGCTATTAACTTTATCTCTACTGTAGGAAATATGCGTTCTCCTGGGT
TAGTTGCTGAGCGAATTCCTTTATTTGTGTGGGCTGTTACGGTAACAGCTATTTTGTTAG
TGGCTGCGTTACCTGTGTTAGCTGGGGCTATTACTATACTACTTACTGATCGCAATTTAA
ATACGTCTTTTTTTGACCCTACTGGAGGGGGAGATCCAATTTTGTATATACATTTGTTTT
NNNNNNNNNNNNNNNNNNNNNNNNNNNNNNNNNNNNNNNNNNNNNNNNNNNNNNNNNNNN
NNNNNNNNNNNNNNNNNNNNNNNNNNNNNNNNNNNNNNNNNNNNNNNNNNNNNNNNNNNN
NNNNNNNNNNNNNNNNNNNNNNNNNNNNNNNNNNNNNNNNNNNNNNNNNNNNNNNNNNNN
NNNNNNNNNNNNNNNNNNNNNNNNNNNNNNNNNNNNNNNNNNNNNNNNNNNNNNNNNNNN
NNNNNNNNNNNNNNNNNNNNNNNNNNNNNNNNNNNNNNNNNNNNNNNNNNNNNNNNNNNN
NNNNNNNNNNNNNNNNNNNNNNNNNNNNNNNNNNNNNNNNNNNNNNNNNNNNNNNNNNNN
NNNNNNNNNNNNNNNNNNNNNNNNNNNNNNNNNNNNNNNNNNNNNNNNNNNNNNNNNNNN
NNNNNNNNNNNNNNNNNNNNNNNNNNNNNNNNNNNNNNNNNNNNNNNNNNNNNNNNNNNN
NNNNNNNNNNNNNNNNNNNNNNNNNNNNNNNNNNNNNNNNNNNNNNNNNNNNNNNNNNNN
NNNNNNNNNNNNNNNNNNNNNNNNNNNNNNNNNNNNNNNNNNNNNNNNNNNNNNNNNNNN
NNNNNNNNNNNNNNNNNNNNNNNNNNNNNNNNNNNNNNNNNNNNNNNNNNNNNNNNNNNN
NNNNNNNNNNNNNNNNNNNNNNNNNNNNNNNNNNNNNNNNNNNNNNNNNNNNNNNNNNNN
NNNNNNNNNNNNNNNNNNNNNNNNNNNNNNNNNNNNNNNNNNNNNNNNNNNNNNNNNNNN
NNNNNNNNNNNNNNNNNNNNNNNNNNNNNNNNNNNNNNNNNNNNNNNNNNNNNNNNNNNN
NNNNNNNNNNNNNNNNNNNNNNNNNNNNNNNNNNNNNNNNNNNNNNNNNNNNNNNNNNNN
NNNNNNNNNNNNNNNNNNNNNNNNNNNNNNNNNNNNNNNNNNNNNNNNNNNNNNNNNNNN
NNNNNNNNNNNNNNNNNNNNNNNNNNNNNNNNNNNNNNNNNNNNNNNNNNNNNNNNNNNN
NNNNNNNNNNNNNNNNNNNNNNNNNNNNNNNNNNNNNNNNNNNNNNNNNNNNNNNNNNNN
NNNNNNNNNNNNNNNNNNNNNNNNNNNNNNNNNNNNNNNNNNNNNNNNNNNNNNNNNNNN
NNNNNNNNNNNNNNNNNNNNNNNNNNNNNNNNNNNNNNNNNNNNNNNNNNNNNNNNNNNN
NNNNNNNNNNNNNNNNNNNNNNNNNNNNNNNNNNNN
>680_3_Y_avaensis
GTACTTTATATTTATTGTTTGCTTTGTGGTCTGGATTGATTGGATTAGCTTTGAGGCTTT
TGATTCGGGCTGAATTAGGGCAACCTGGAAGGTTGCTTGGTGATGATCAGCTTTATAATG
TGATTGTGACTGCTCATGCTTTTATGATGATTTTTTTCTTGGTAATGCCTATAATAATTG
GGGGTTTTGGTAATTGATTAATTCCCCTAATGATTGGGGCACCTGATATGGCTTTCCCTC
GCTTAAATAATTTGAGGTTTTGGTTACTTGTGCCGGCTCTTTTTTTGTTGTTGAGGTCCT
CACTTGTAGAGAGTGGAGTTGGAACAGGTTGGACTGTGTATCCACCTTTGTCAGGTAATG
TAGCACATTCTGGTGCTTCGGTGGATTTGGCTATTTTTTCTTTACATCTTGCTGGTGCTT
CTTCTATTCTAGGAGCTATTAACTTTATCTCTACTGTAGGAAATATGCGTTCTCCTGGGT
TAGTTGCTGAGCGAATTCCTTTATTTGTGTGGGCTGTTACGGTAACAGCTATTTTGTTAG
TGGCTGCGTTACCTGTGTTAGCTGGGGCTATTACTATACTACTTACTGATCGCAATTTAA
ATACGTCTTTTTTTGACCCTACTGGAGGGGGAGATCCAATTTTGTATATACATTTGTTTT
NNNNNNNNNNNNNNNNNNNNNNNNNNNNNNNNNNNNNNNNNNNNNNNNNNNNNNNNNNNN
NNNNNNNNNGCGTGCTAAGGTAGCGTAATAATTAGCCTCTTAATTGGAGGCCAGTGAAAG
GCAACACGAGGAACACCTATACTTTGAAAAAAACTTTTCTTCTAAGTGAAAAGCCTTAGA
TATTAAAGAAGACGAAAAGACCCCGCGGAACTTTACCTTCTCTCTATAACTGCAAATAAC
TATACTAAGGTTTGATTGGGGCAATCTCGGAACCGCCTAAACTTCCGATCTACATCCAAC
CAATCTAAAATTTGTTTCGGACTAAAAAGAAGTTACCCCGGGGATAACAGCGTTATCCAA
CTTAAGAGTACACATCGAAAGTTGGGTTTGCGACCTCGATGTTGGCTTAAGGACATCCAC
ATAAGTGCAGCCGCTATGAATGGATAGTCTGTTCGACTATTATAACCTTATAAGCGGAGG
AAAAGAAACTAACAAGGATTCCCCTAGTAACGGCGAGTGAAGAGGGAAAAGCCCAGCACC
GAATCCCACAGCCTTGCGCTGTCGGGAACTGTGGTGTATAGGAAGCCTACTTGTCGGCGC
GTTCGGGTGCCCAAGTCCTCCTGATCGTGGCCTCTCCCACAGCGGGTGTCAGGCCCGTAG
AGGCACTCGACGTTGCCGGCTCGGAGCTTCCTCGGAGTCGGGTTGTTTGGGAATGCAGCC
CAAAGGGGTGGTAAACTCCATCTAAGGCTAAATACGTCCACGAGTCCGATAGCAAACAAG
TACCGTGAGGGAAAGTTGAAAAGAACTTTGAAGAGAGAGTTCAAGAGTACGTGAAACCGC
TTAGAGGCAAACGGATGGACCCGCAATGGGTCGGCCCGGGGGATTCAACCGGTGCGTCGG
GACGCGCGGGGGATGCGGAGCTGTAAAGCCCGTGCCTTCGCGTGGTCTCCGGGCGGACCG
GTGCACTTTCCTCGGGTCGACGGCCACGACCGGCTCTCCGCGGCCACAAGCCTGTCGCTG
GGAAGGTGACCCCGCGCCGCGGCGTTACAGCCCAGCCAGTTCGTTGAGCTCGTCGGAGGG
CCGAGGTTGCCGCTTCTCGTCACCCTCGCCATCCTTGCTCGTCACGACCGGGGCGGACTG
GTCGGTCAGTGCTCTCCCGACCGCGAGCGTAGGAAGGGCGGGTACGGTGCGAGATGCTTC
GGGCCGGTGGCGAATCGGTCGGTCCTCCATCCGACC
>680_5_Y_avaensis
GTACTTTATATTTATTGTTTGCTTTGTGGTCTGGATTGATTGGATTAGCTTTGAGGCTTT
TGATTCGGGCTGAATTAGGGCAACCTGGAAGGTTGCTTGGTGATGATCAGCTTTATAATG
TGATTGTGACTGCTCATGCTTTTATGATGATTTTTTTCTTGGTAATGCCTATAATAATTG
GGGGTTTTGGTAATTGATTAATTCCCCTAATGATTGGGGCACCTGATATGGCTTTCCCTC
GCTTAAATAATTTGAGGTTTTGGTTACTTGTGCCGGCTCTTTTTTTGTTGTTGAGGTCCT
CACTTGTAGAGAGTGGAGTTGGAACAGGTTGGACTGTGTATCCACCTTTGTCAGGTAATG
TAGCACATTCTGGTGCTTCGGTGGATTTGGCTATTTTTTCTTTACATCTTGCTGGTGCTT
CTTCTATTCTAGGAGCTATTAACTTTATCTCTACTGTAGGAAATATGCGTTCTCCTGGGT
TAGTTGCTGAGCGAATTCCTTTATTTGTGTGGGCTGTTACGGTAACAGCTATTTTGTTAG
TGGCTGCGTTACCTGTGTTAGCTGGGGCTATTACTATACTACTTACTGATCGCAATTTAA
ATACGTCTTTTTTTGACCCTACTGGAGGGGGAGATCCAATTTTGTATATACATTTGTTTT
NNNNNNNNNNNNNNNNNNNNNNNNNNNNNNNNNNNNNNNNNNNNNNNNNNNNNNNNNNNN
NNNNNNNNNNNNNNNNNNNNNNNNNNNNNNNNNNNNNNNNNNNNNNNNNNNNNNNNNNNN
NNNNNNNNNNNNNNNNNNNNNNNNNNNNNNNNNNNNNNNNNNNNNNNNNNNNNNNNNNNN
NNNNNNNNNNNNNNNNNNNNNNNNNNNNNNNNNNNNNNNNNNNNNNNNNNNNNNNNNNNN
NNNNNNNNNNNNNNNNNNNNNNNNNNNNNNNNNNNNNNNNNNNNNNNNNNNNNNNNNNNN
NNNNNNNNNNNNNNNNNNNNNNNNNNNNNNNNNNNNNNNNNNNNNNNNNNNNNNNNNNNN
NNNNNNNNNNNNNNNNNNNNNNNNNNNNNNNNNNNNNNNNNNNNNNNNNNNNNNNNNNNN
NNNNNNNNNNNNNNNNNNNNNNNNNNNNNNNNNNNNNNNNNNNNNNNNNNTAAGCGGAGG
AAAAGAAACTAACAAGGATTCCCCTAGTAACGGCGAGTGAAGAGGGAAAAGCCCAGCACC
GAATCCCACAGCCTTGCGCTGTCGGGAACTGTGGTGTATAGGAAGCCTACTTGTCGGCGC
GTTCGGGTGCCCAAGTCCTCCTGATCGTGGCCTCTCCCACAGCGGGTGTCAGGCCCGTAG
AGGCACTCGACGTTGCCGGCTCGGAGCTTCCTCGGAGTCGGGTTGTTTGGGAATGCAGCC
CAAAGGGGTGGTAAACTCCATCTAAGGCTAAATACGTCCACGAGTCCGATAGCAAACAAG
TACCGTGAGGGAAAGTTGAAAAGAACTTTGAAGAGAGAGTTCAAGAGTACGTGAAACCGC
TTAGAGGCAAACGGATGGACCCGCAATGGGTCGGCCCGGGGGATTCAACCGGTGCGTCGG
GACGCGCGGGGGATGCGGAGCTGTAAAGCCCGTGCCTTCGCGTGGTCTCCGGGCGGACCG
GTGCACTTTCCTCGGGTCGACGGCCACGACCGGCTCTCCGCGGCCACAAGCCTGTCGCTG
GGAAGGTGACCCCGCGCCGCGGCGTTACAGCCCAGCCAGTTCGTTGAGCTCGTCGGAGGG
CCGAGGTTGCCGCTTCTCGTCACCCTCGCCATCCTTGCTCGTCACGACCGGGGCGGACTG
GTCGGTCAGTGCTCTCCCGACCGCGAGCGTAGGAAGGGCGGGTACGGTGCGAGATGCTTC
GGGCCGGTGGCGAATCGGTCGGTCCTCCATCCGACC
>665_1_Y_zayleymanensis
GTACGTTATATTTAGTATTTGCTTTGTGGTCTGGATTGATTGGGTTAGCTTTGAGTCTTT
TGATTCGTGCTGAGTTAGGGCAGCCTGGAAGGTTGCTTGGTGACGATCAGCTTTATAATG
TAATTGTGACTGCTCATGCTTTTATAATGATTTTCTTCTTGGTAATGCCTATGATGATTG
GGGGTTTTGGTAATTGGTTGATTCCCCTAATGATTGGGGCACCTGATATGGCTTTTCCTC
GATTAAATAATTTGAGGTTTTGGTTGCTTGTGCCGGCTCTTTTTTTGTTGTTGAGGTCTT
CACTTGTAGAGAGTGGGGTTGGAACAGGTTGGACTGTGTATCCACCTTTATCAGGTAATG
TGGCTCATTCTGGTGCTTCGGTGGATTTGGCTATTTTTTCTTTACATCTTGCTGGTGCTT
CTTCCATTTTGGGGGCTATTAATTTTATCTCTACTGTAGGAAATATACGCTCTCCTGGGT
TAGTCGCTGAGCGAATTCCTTTGTTTGTGTGGGCTGTTACGGTAACAGCTATTTTGTTAG
TAGCTGCGTTGCCTGTATTGGCTGGTGCTATTACTATGTTGCTTACTGATCGTAATTTAA
ATACGTCTTTTTTTGACCCTACTGGTGGGGGAGATCCGATTTTATATATGCATTTATTTT
TCGTCTTTTGTA-AATT-TAATAAAAGATAATGCCTGCCCAGTGAATTTAAACGGCCGCG
TTAGCGTGAGCGTGCTAAGGTAGCGTAATAATTAGCCTCTTAATTGGAGGCCAGTGAAAG
GCAACACGAGGAACACCTATACTTTAAAAAAAACTTTTCTTCTAAGTGAAAAGCCTTAGA
TACTAAAGAAGACGAAAAGACCCCGCGGAACTTTACCTTTTCTTTATAACTATAAATAAA
TATACTAAGGTTTGATTGGGGCAATCTCGGAACCACCTAAACTTCCGACCTACATACAGA
CAATCTAAAATTTGTTTCAGACCAAAAAGAAGTTACCCCGGGGATAACAGCGTTATCCAA
CTTAAGAGTACACATCGAAAGTTGGGTTTGCGACCTCGATGTTGGCTTAAGGACATCCAC
ATAAGTGCAGCCGCTATGAATGGATAGTCTGTTCGACTATTATAACCTTATAAGCGGAGG
AAAAGAAACTAACAAGGATTCCCCTAGTAACGGCGAGTGAAGAGGGAAAAGCCCAGCACC
GAATCCCACAGCCTTGCGCTGTCGGGAACTGTGGTGTATAGGAAGCCTACTTGTCGGCGC
GTTCGGGTGCCCAAGTCCTCCTGATCGTGGCCTCTCCCACAGCGGGTGTCAGGCCCGTAG
AGGCACTCGACGTTGCCGGCTCGGAGCTTCCTCGGAGTCGGGTTGTTTGGGAATGCAGCC
CAAAGGGGTGGTAAACTCCATCTAAGGCTAAATACGTCCACGAGTCCGATAGCAAACAAG
TACCGTGAGGGAAAGTTGAAAAGAACTTTGAAGAGAGAGTTCAAGAGTACGTGAAACCGC
TTAGAGGCAAACGGATGGACCCGCAATGGGTCGGCCCGGGGGATTCAACCGGTGCGTCGG
GACGCGCGGGGGATGCGGAGCTGTAAAGCCCGTGCCTTCGCGTGGTCTCCGGGCGGACCG
GTGCACTTTCCTCGGGTCGACGGCCACGACCGGCTCTCCGCGGCCACAAGCCTGTCGCTG
GGAAGGTGACCCCGCGCCGCGGCGTTACAGCCCAGCCAGTTCGTTGAGCTCGTCGGAGGG
CCGAGGTTGCCGCTTCTCGTCACCCTCGCCATCCTTGCTCGTCACGACCGGGGCGGACTG
GTCGGTCAGTGCTCTCCCGACCGCGAGCGTAGGAAGGGCGGGTACGGTGCGAGATGCTTC
GGGCCGGTGGCGAATCGGTCGGTCCTCCATCCGACC
>679_1_Y_zayleymanensis
GTACGTTATATTTAGTATTTGCTTTGTGGTCTGGATTGATTGGGTTAGCTTTGAGTCTTT
TGATTCGTGCTGAGTTAGGGCAGCCTGGAAGGTTGCTTGGTGACGATCAGCTTTATAATG
TGATTGTGACTGCTCATGCTTTTATAATGATTTTCTTCTTGGTAATGCCTATGATGATTG
GGGGTTTTGGTAATTGGTTGATTCCCCTAATGATTGGGGCACCTGATATGGCTTTTCCTC
GATTAAATAATTTGAGGTTTTGGTTGCTTGTGCCGGCTCTTTTTTTGTTGTTGAGGTCTT
CACTTGTAGAGAGTGGGGTTGGAACAGGTTGGACTGTGTATCCACCTTTATCAGGTAATG
TGGCTCATTCTGGTGCTTCGGTGGATTTGGCTATTTTTTCTTTACATCTTGCTGGTGCTT
CTTCCATTTTGGGGGCTATTAATTTTATCTCTACTGTAGGGAATATGCGCTCTCCTGGGT
TAGTCGCTGAGCGAATTCCTTTGTTTGTGTGGGCTGTTACGGTAACAGCTATTTTGTTAG
TAGCTGCGTTGCCTGTATTGGCTGGTGCTATTACTATGTTGCTTACTGATCGTAATCTAA
ATACGTCTTTTTTTGACCCTACTGGTGGGGGAGATCCGATTTTATATATGCATTTATTTT
TCGTCTTTTGTA-AATT-TAATAAAAGATAATGCCTGCCCAGTGAATTTAAACGGCCGCG
TTAGCGTGAGCGTGCTAAGGTAGCGTAATAATTAGCCTCTTAATTGGAGGCCAGTGAAAG
GCAACACGAGGAACACCTATACTTTAAAAAAAACTTTTCTTCTAAGTGAAAAGCCTTAGA
TATTAAAGAAGACGAAAAGACCCCGCGGAACTTTACCTTTTCTTTATAACTATAAATAAA
TATACTAAGGTTTGATTGGGGCAATCTCGGAACCACCTAAACTTCCGACCTACATACAGA
CAATCTAAAATTTGTTTCAGACCAAAAAGAAGTTACCCCGGGGATAACAGCGTTATCCAA
CTTAAGAGTACACATCGAAAGTTGGGTTTGCGACCTCGATGTTGGCTTAAGGACATCCAC
ATAAGTGCAGCCGCTATGAATGGATAGTCTGTTCGACTATTATAACCTTATAAGCGGAGG
AAAAGAAACTAACAAGGATTCCCCTAGTAACGGCGAGTGAAGAGGGAAAAGCCCAGCACC
GAATCCCACAGCCTTGCGCTGTCGGGAACTGTGGTGTATAGGAAGCCTACTTGTCGGCGC
GTTCGGGTGCCCAAGTCCTCCTGATCGTGGCCTCTCCCACAGCGGGTGTCAGGCCCGTAG
AGGCACTCGACGTTGCCGGCTCGGAGCTTCCTCGGAGTCGGGTTGTTTGGGAATGCAGCC
CAAAGGGGTGGTAAACTCCATCTAAGGCTAAATACGTCCACGAGTCCGATAGCAAACAAG
TACCGTGAGGGAAAGTTGAAAAGAACTTTGAAGAGAGAGTTCAAGAGTACGTGAAACCGC
TTAGAGGCAAACGGATGGACCCGCAATGGGTCGGCCCGGGGGATTCAACCGGTGCGTCGG
GACGCGCGGGGGATGCGGAGCTGTAAAGCCCGTGCCTTCGCGTGGTCTCCGGGCGGACCG
GTGCACTTTCCTCGGGTCGACGGCCACGACCGGCTCTCCGCGGCCACAAGCCTGTCGCTG
GGAAGGTGACCCCGCGCCGCGGCGTTACAGCCCAGCCAGTTCGTTGAGCTCGTCGGAGGG
CCGAGGTTGCCGCTTCTCGTCACCCTCGCCATCCTTGCTCGTCACGACCGGGGCGGACTG
GTCGGTCAGTGCTCTCCCGACCGCGAGCGTAGGAAGGGCGGGTACGGTGCGAGATGCTTC
GGGCCGGTGGCGAATCGGTCGGTCCTCCATCCGACC
>679_2_Y_zayleymanensis
GTACGTTATATTTAGTATTTGCTTTGTGGTCTGGATTGATTGGGTTAGCTTTGAGTCTTT
TGATTCGTGCTGAGTTAGGGCAGCCTGGAAGGTTGCTTGGTGACGATCAGCTTTATAATG
TGATTGTGACTGCTCATGCTTTTATAATGATTTTCTTCTTGGTAATGCCTATGATGATTG
GGGGTTTTGGTAATTGGTTGATTCCCCTAATGATTGGGGCACCTGATATGGCTTTTCCTC
GATTAAATAATTTGAGGTTTTGGTTGCTTGTGCCGGCTCTTTTTTTGTTGTTGAGGTCTT
CACTTGTAGAGAGTGGGGTTGGAACAGGTTGGACTGTGTATCCACCTTTATCAGGTAATG
TGGCTCATTCTGGTGCTTCGGTGGATTTGGCTATTTTTTCTTTACATCTTGCTGGTGCTT
CTTCCATTTTGGGGGCTATTAATTTTATCTCTACTGTAGGGAATATGCGCTCTCCTGGGT
TAGTCGCTGAGCGAATTCCTTTGTTTGTGTGGGCTGTTACGGTAACAGCTATTTTGTTAG
TAGCTGCGTTGCCTGTATTGGCTGGTGCTATTACTATGTTGCTTACTGATCGTAATCTAA
ATACGTCTTTTTTTGACCCTACTGGTGGGGGAGATCCGATTTTATATATGCATTTATTTT
TCGTCTTTTGTA-AATT-TAATAAAAGATAATGCCTGCCCAGTGAATTTAAACGGCCGCG
TTAGCGTGAGCGTGCTAAGGTAGCGTAATAATTAGCCTCTTAATTGGAGGCCAGTGAAAG
GCAACACGAGGAACACCTATACTTTAAAAAAAACTTTTCTTCTAAGTGAAAAGCCTTAGA
TACTAAAGAAGACGAAAAGACCCCGCGGAACTTTACCTTTTCTTTATAACTATAAATAAA
TATACTAAGGTTTGATTGGGGCAATCTCGGAACCACCTAAACTTCCGACCTACATACAGA
CAATCTAAAATTTGTTTCAGACCAAAAAGAAGTTACCCCGGGGATAACAGCGTTATCCAA
CTTAAGAGTACACATCGAAAGTTGGGTTTGCGACCTCGATGTTGGCTTAAGGACATCCAC
ATAAGTGCAGCCGCTATGAATGGATAGTCTGTTCGACTATTATAACCTTATAAGCGGAGG
AAAAGAAACTAACAAGGATTCCCCTAGTAACGGCGAGTGAAGAGGGAAAAGCCCAGCACC
GAATCCCACAGCCTTGCGCTGTCGGGAACTGTGGTGTATAGGAAGCCTACTTGTCGGCGC
GTTCGGGTGCCCAAGTCCTCCTGATCGTGGCCTCTCCCACAGCGGGTGTCAGGCCCGTAG
AGGCACTCGACGTTGCCGGCTCGGAGCTTCCTCGGAGTCGGGTTGTTTGGGAATGCAGCC
CAAAGGGGTGGTAAACTCCATCTAAGGCTAAATACGTCCACGAGTCCGATAGCAAACAAG
TACCGTGAGGGAAAGTTGAAAAGAACTTTGAAGAGAGAGTTCAAGAGTACGTGAAACCGC
TTAGAGGCAAACGGATGGACCCGCAATGGGTCGGCCCGGGGGATTCAACCGGTGCGTCGG
GACGCGCGGGGGATGCGGAGCTGTAAAGCCCGTGCCTTCGCGTGGTCTCCGGGCGGACCG
GTGCACTTTCCTCGGGTCGACGGCCACGACCGGCTCTCCGCGGCCACAAGCCTGTCGCTG
GGAAGGTGACCCCGCGCCGCGGCGTTACAGCCCAGCCAGTTCGTTGAGCTCGTCGGAGGG
CCGAGGTTGCCGCTTCTCGTCACCCTCGCCATCCTTGCTCGTCACGACCGGGGCGGACTG
GTCGGTCAGTGCTCTCCCGACCGCGAGCGTAGGAAGGGCGGGTACGGTGCGAGATGCTTC
GGGCCGGTGGCGAATCGGTCGGTCCTCCATCCGACC
>628_1_M_lenyanensis
GTACGTTGTATTTGTTGTTAGCTTTGTGGTCTGGGTTGATTGGGTTAGCTTTGAGGCTTT
TGATTCGGGCAGAGTTGGGACAACCGGGTAGGTTACTGGGTGATGATCAGTTGTATAATG
TGATTGTTACGGCACATGCTTTTATAATGATTTTCTTTTTGGTGATGCCTATAATGATTG
GTGGTTTTGGAAATTGACTCATTCCACTTATAATTGGGGCTCCTGATATGGCTTTTCCAC
GGCTAAATAATTTGAGATTTTGATTGCTTGTGCCAGCTCTTTTCCTTTTATTGAGGTCTT
CGTTGGTAGAGAGTGGGGTTGGGACTGGTTGGACTGTGTATCCGCCGTTGTCTGGGAATG
TGGCCCATTCGGGGGCTTCGGTGGATTTAGCTATTTTTTCGTTACATCTTGCGGGTGCCT
CTTCTATTTTGGGGGCTATTAATTTTATTTCTACGGTTGGGAATATGCGGTCTCCTGGAT
TGATCGCTGAGCGTATTCCATTGTTTGTGTGAGCTGTAACAGTAACAGCGATTTTGTTAG
TTGCGGCTTTGCCTGTGTTGGCTGGTGCTATTACTATGTTACTTACTGATCGTAACTTAA
ATACGTCATTCTTTGATCCGACTGGAGGGGGGGATCCTATTTTGTATATGCATTTGTTTT
TCGTCCTTTGACA-CCT-CGATAAAGGATAATGCCTGCCCAGTGAATTTAAACGGCCGCG
TTAGCGTGAGCGTGCTAAGGTAGCGTAATAAATAGCCTCTTAATTGGAGGCCAGTGAATG
GCAAGACTAAGAACACCTATACACCCAAAAAAACTTTTCGTCTAAGTGAAAAGACTTAGA
TAATAAGGAAGACGAAAAGACCCCGCGGAACTTTACTTTATCT-AATAACAACTAAC-AG
TATGAAAA-GTTTGATTGGGGCAATCTCGGAACC-CTCAAGCTTCCGA-CATCTAGAAAA
AAATAAAAAACTTACTATGGACAAGACAGAAGTTACCCCGGGGATAACAGCGTTATCCAA
CTTGAGAGTACACATCGAAAGTTGGGTTTGCGACCTCGATGTTGGCTTAAGGACATCCGC
ATCAGTGCAGCCGCTATG-CAGGACAGTCTGTTCGACTGTTACACCCTTATAAGCGGAGG
AAAAGAAACTAACAAGGATTCCCCCAGTAACGGCGAGTGAAGAGGGAAAAGCCCAGCACC
GAATCCCACAGCCTTGCGCTGTCGGGAACTGTGGTGTATAGGAAGCGTACTTGTCGTCGT
GTTCGGGTACCCAAGTCCTCCTGATCGTGGCCTCTCCCATAGCGGGTGTCAGGCCCATAG
AGGCACCCGACGGCGTCGGCTTGGAGCTTCCTCGGAGTCGGGTTGTTTGGGAATGCAGCC
CAAAGGGGTGGTAAACTCCATCTAAGGCTAAATACTGCCACGAGTCCGATAGCAAACAAG
TACCGTGAGGGAAAGTTGAAAAGAACTTTGAAGAGAGAGTTCAAGAGTACGTGAAACCGC
TTAGAGGCAAACGGGTGGACCCGCAATGTGTCGACTCGGGGGATTCAACCGGTACGCCGG
GACGCGCTGGGGATGCGGAGCCGTAAAGCCCGTGCCTTGGCGTGGTCTCCGGGCGGCCTG
GTGCACTTTCCTCGGGTCGATGGCCACGGCCGGCTCTCCGCGGCCAGAAGCCTATCGCTG
GTAAGGTGACC------CGCGGTGTTATAGACCAGCTTGTCCGTTGAGCTCGTCGGAGGG
CCGAGGTTGCCGCGTCCCTTCACCCTCGCCATCCTTGCTCGTCACGACTGGGGTGGACTG
TCCCGTCAGTGCTCTCCCGACCGCGAGCGTAGGAAGGGCCGGTACGGTGTGGGATGCTTC
GGGCCAGTGGCGAATCGGTCGGTCCCCCACCCGACC
>628_2_M_lenyanensis
GTACGTTGTATTTGTTGTTAGCTTTGTGGTCTGGGTTGATTGGGTTAGCTTTGAGGCTTT
TGATTCGGGCAGAGTTGGGACAACCGGGTAGGTTGCTGGGTGATGATCAGTTGTATAATG
TGATTGTTACGGCACATGCTTTTATAATGATTTTCTTTTTGGTGATGCCTATAATGATTG
GTGGTTTTGGAAATTGACTCATTCCACTTATAATTGGGGCTCCTGATATGGCTTTTCCAC
GGCTAAATAATTTGAGATTTTGGTTGCTTGTGCCAGCTCTTTTCCTTTTATTGAGGTCTT
CGTTGGTAGAGAGTGGGGTTGGGACTGGTTGGACTGTGTATCCGCCGTTGTCTGGGAATG
TGGCCCATTCGGGGGCTTCGGTGGATTTAGCTATTTTTTCGTTACATCTTGCGGGTGCCT
CTTCTATTTTGGGGGCTATTAATTTTATTTCTACGGTTGGGAATATGCGGTCTCCTGGAT
TGATCGCTGAGCGTATTCCATTGTTTGTGTGAGCTGTAACAGTAACAGCGATTTTGTTAG
TTGCGGCTTTGCCTGTGTTGGCTGGTGCTATTACTATGTTACTTACTGATCGTAACTTAA
ATACGTCATTCTTTGATCCGACTGGAGGGGGGGATCCTATTTTGTATATGCATTTGTTTT
TCGTCCTTTGACA-CCT-CGATAAAGGATAATGCCTGCCCAGTGAATTTAAACGGCCGCG
TTAGCGTGAGCGTGCTAAGGTAGCGTAATAAATAGCCTCTTAATTGGAGGCCAGTGAATG
GCAAGACTAAGAACACCTATACACTCAAAAAAACTTTTCGTCTAAGTGAAAAGACTTAGA
TAATAAGGAAGACGAAAAGACCCCGCGGAACTTTACTTTATCT-AATAACAACTAAC-AG
TATGAAAA-GTTTGATTGGGGCAATCTCGGAACC-CTCAAGCTTCCGA-CATCTAGAAAA
AAATAAAAAACTTACTATGGACAAGACAGAAGTTACCCCGGGGATAACAGCGTTATCCAA
CTTGAGAGTACACATCGAAAGTTGGGTTTGCGACCTCGATGTTGGCTTAAGGACATCCGC
ATCAGTGCAGCCGCTATG-CAGGACAGTCTGTTCGACTGTTACACCCTTATAAGCGGAGG
AAAAGAAACTAACAAGGATTCCCCCAGTAACGGCGAGTGAAGAGGGAAAAGCCCAGCACC
GAATCCCACAGCCTTGCGCTGTCGGGAACTGTGGTGTATAGGAAGCGTACTTGTCGTCGT
GTTCGGGTACCCAAGTCCTCCTGATCGTGGCCTCTCCCATAGCGGGTGTCAGGCCCATAG
AGGCACCCGACGGCGTCGGCTTGGAGCTTCCTCGGAGTCGGGTTGTTTGGGAATGCAGCC
CAAAGGGGTGGTAAACTCCATCTAAGGCTAAATACTGCCACGAGTCCGATAGCAAACAAG
TACCGTGAGGGAAAGTTGAAAAGAACTTTGAAGAGAGAGTTCAAGAGTACGTGAAACCGC
TTAGAGGCAAACGGGTGGACCCGCAATGTGTCGACTCGGGGGATTCAACCGGTACGCCGG
GACGCGCTGGGGATGCGGAGCCGTAAAGCCCGTGCCTTGGCGTGGTCTCCGGGCGGCCTG
GTGCACTTTCCTCGGGTCGATGGCCACGGCCGGCTCTCCGCGGCCAGAAGCCTATCGCTG
GTAAGGTGACC------CGCGGTGTTATAGACCAGCTTGTCCGTTGAGCTCGTCGGAGGG
CCGAGGTTGCCGCGTCCCTTCACCCTCGCCATCCTTGCTCGTCACGACTGGGGTGGACTG
TCCCGTCAGTGCTCTCCCGACCGCGAGCGTAGGAAGGGCCGGTACGGTGTGGGATGCTTC
GGGCCAGTGGCGAATCGGTCGGTCCCCCACCCGACC
>628_3_M_lenyanensis
GTACGTTGTATTTGTTGTTAGCTTTGTGGTCTGGGTTGATTGGGTTAGCTTTGAGGCTTT
TGATTCGGGCAGAGTTGGGACAACCGGGTAGGTTGCTGGGTGATGATCAGTTGTATAATG
TGATTGTTACGGCACATGCTTTTATAATGATTTTCTTTTTGGTGATGCCTATAATGATTG
GTGGTTTTGGAAATTGACTCATTCCACTTATAATTGGGGCTCCTGATATGGCTTTTCCAC
GGCTAAATAATTTGAGATTTTGGTTGCTTGTGCCAGCTCTTTTCCTTTTATTGAGGTCTT
CGTTGGTAGAGAGTGGGGTTGGGACTGGTTGGACTGTGTATCCGCCGTTGTCTGGGAATG
TGGCCCATTCGGGGGCTTCGGTGGATTTAGCTATTTTTTCGTTACATCTTGCGGGTGCCT
CTTCTATTTTGGGGGCTATTAATTTTATTTCTACGGTTGGGAATATGCGGTCTCCTGGAT
TGATCGCTGAGCGTATTCCATTGTTTGTGTGAGCTGTAACAGTAACAGCGATTTTGTTAG
TTGCGGCTTTGCCTGTGTTGGCTGGTGCTATTACTATGTTACTTACTGATCGTAACTTAA
ATACGTCATTCTTTGATCCGACTGGAGGGGGGGATCCTATTTTGTATATGCATTTGTTTT
TCGTCCTTTGACA-CCT-CGATAAAGGATAATGCCTGCCCAGTGAATTTAAACGGCCGCG
TTAGCGTGAGCGTGCTAAGGTAGCGTAATAAATAGCCTCTTAATTGGAGGCCAGTGAATG
GCAAGACTAAGAACACCTATACACTCAAAAAAACTTTTCGTCTAAGTGAAAAGACTTAGA
TAATAAGGAAGACGAAAAGACCCCGCGGAACTTTACTTTATCT-AATAACAACTAAC-AG
TATGAAAA-GTTTGATTGGGGCAATCTCGGAACC-CTCAAGCTTCCGA-CATCTAGAAAA
AAATAAAAAACTTACTATGGACAAGACAGAAGTTACCCCGGGGATAACAGCGTTATCCAA
CTTGAGAGTACACATCGAAAGTTGGGTTTGCGACCTCGATGTTGGCTTAAGGACATCCGC
ATCAGTGCAGCCGCTATG-CAGGACAGTCTGTTCGACTGTTACACCCTTATAAGCGGAGG
AAAAGAAACTAACAAGGATTCCCCCAGTAACGGCGAGTGAAGAGGGAAAAGCCCAGCACC
GAATCCCACAGCCTTGCGCTGTCGGGAACTGTGGTGTATAGGAAGCGTACTTGTCGTCGT
GTTCGGGTACCCAAGTCCTCCTGATCGTGGCCTCTCCCATAGCGGGTGTCAGGCCCATAG
AGGCACCCGACGGCGTCGGCTTGGAGCTTCCTCGGAGTCGGGTTGTTTGGGAATGCAGCC
CAAAGGGGTGGTAAACTCCATCTAAGGCTAAATACTGCCACGAGTCCGATAGCAAACAAG
TACCGTGAGGGAAAGTTGAAAAGAACTTTGAAGAGAGAGTTCAAGAGTACGTGAAACCGC
TTAGAGGCAAACGGGTGGACCCGCAATGTGTCGACTCGGGGGATTCAACCGGTACGCCGG
GACGCGCTGGGGATGCGGAGCCGTAAAGCCCGTGCCTTGGCGTGGTCTCCGGGCGGCCTG
GTGCACTTTCCTCGGGTCGATGGCCACGGCCGGCTCTCCGCGGCCAGAAGCCTATCGCTG
GTAAGGTGACC------CGCGGTGTTATAGACCAGCTTGTTCGTTGAGCTCGTCGGAGGG
CCGAGGTTGCCGCGTCCCTTCACCCTCGCCATCCTTGCTCGTCACGACTGGGGTGGACTG
TCCCGTCAGTGCTCTCCCGACCGCGAGCGTAGGAAGGGCCGGTACGGTGTGGGATGCTTC
GGGCCAGTGGCGAATCGGTCGGTCCCCCACCCGACC
>643_4_S_tanintharyiensis
GCACTTTATATTTGTTATTAGCTTTATGGTCTGGATTAATTGGTTTGGCTTTAAGGCTTT
TGATTCGTGCGGAGTTAGGGCAGCCTGGTAGATTATTGGGTGATGACCAGCTATATAACG
TAATTGTTACGGCACATGCTTTTATGATGATTTTCTTTTTAGTGATGCCTATGATGATTG
GAGGTTTTGGTAATTGACTTATTCCGCTTATAATCGGGGCTCCTGATATGGCATTCCCGC
GACTAAATAATTTAAGGTTTTGGTTGCTTGTGCCAGCTCTTTTTTTATTGTTGAGGTCTT
CTCTGGTAGAGAGTGGGGTTGGAACTGGTTGGACAGTGTACCCTCCGTTGTCTGGGAATG
TGGCTCATTCTGGGGCTTCGGTTGATCTAGCTATTTTTTCGTTACATCTTGCGGGTGCTT
CATCTATTCTGGGGGCCATTAACTTTATTTCGACGGTTGGTAATATGCGGTCTCCTGGGT
TGATCGCTGAACGAATTCCTTTGTTTGTGTGGGCTGTAACTGTGACAGCTATTCTGTTGG
TAGCGGCTTTGCCGGTGTTGGCAGGGGCTATTACTATGTTGCTTACTGACCGTAATTTGA
ATACGTCATTTTTTGACCCTACTGGGGGGGGTGATCCTATTTTGTATATGCACTTATTTT
TCGTCCTCTGACATTAT-TAATAAAGGATAATGCCTGCCCAGTGAATTTAAACGGCCGCG
TTAGCGTGAGCGTGCTAAGGTAGCGTAATAAATAGCCTCTTAATTGGAGGCCAGTGAATG
GCAAGACTAAGAACACCTATACACCAAAAAGAATTTTTCATCTGAGTGAAAAGACTTAGA
TAACTAGGAAGACGAAAAGACCCCGCGGAGCTTTACTTTCTCT-AGCAACTAACGAA-AG
TGTAATAA-GTTTGATTGGGGCAATCTCGGAACC-ACCAAGCTTCCGA-CACTTAGAAAA
GTATATAAAACATACTATGGACAAGATAGAAGCTACCCCGGGGATAACAGCGTTATCTAA
CTTGAGAGTACACATCGAAAGTTGGGTTTGCGACCTCGATGTTGGCTTAAGGATATCCGC
ATCAGTGCAGCCGCTATG-CAGGACAGTCTGTTCGACTATTATACCCTTATAAGCGGAGG
AAAAGAAACTAACAAGGATTCCCCCAGTAACGGCGAGTGAAGAGGGAAAAGCCCAGCACC
GAATCCCACAGCCTTGCGCTGTCGGGAACTGTGGTGTATAGGAAGCGTACTTGTCGTCGT
GTTCGGGTACCCAAGTCCTCCTGATCGTGGCCTCTCCCATAGCGGGTGTCAGGCCCATAG
AGGCACCCGACGGCGTCGGCTTGGAGCTTCCTCGGAGTCGGGTTGTTTGGGAATGCAGCC
CAAAGGGGTGGTAAACTCCATCTAAGGCTAAATACTGCCACGAGTCCGATAGCAAACAAG
TACCGTGAGGGAAAGTTGAAAAGAACTTTGAAGAGAGAGTTCAAGAGTACGTGAAACCGC
TTAGAGGCAAACGGGTGGACCCGCAATGTGTCGACTCGGGGGATTCAACCGGTACGCCGG
GACGCGCTGGGGATGCGGAGCCGTAAAGCCCGTGCCTTGGCGTGGTCTCCGGGCGGCCTG
GTGCACTTTCCTCGGGTCGATGGCCACGGCCGGCTCTCCGCGGCCAGAAGCCTGTCGCTG
GTAAGGTGACCCCGTGCCGCGGTGTTATAGACCAGCTTGTTCGTTGAGCTCGTCGGAGGG
CCGAGGTTGCCGCGTCCCGTCACCCTCGCCATCCTTGCTCGTCACGACTGGGGTGGACTG
TCCCGTCAGTGCTCTCCCGACCGCGAGCGTAGGAAGGGCTGGTACGGTGTGGGATGCTTC
GGGCCAGTGGCGAATCGGTCGGTCCCCCACCCGACC
>145_3_T_exolescens
GGACTTTGTACTTGTTGTTGGCTTTGTGGTCTGGGTTAATTGGATTAGCTTTGAGGTTGT
TAATTCGGGCTGAACTAGGGCAGCCAGGAAGTTTGTTAGGGGATGACCAGTTGTATAATG
TGATTGTGACTGCTCATGCATTTATAATAATTTTTTTCTTAGTGATGCCAATAATAATTG
GGGGGTTTGGAAATTGGTTAATTCCTTTAATGATTGGGGCTCCAGATATGGCTTTTCCTC
GTTTAAATAATTTGAGGTTTTGATTGTTGGTGCCTGCTTTGTTTTTGTTATTGAGGTCCT
CTTTGGTTGAGAGAGGTGTGGGAACCGGTTGGACAGTCTATCCTCCGTTGTCTGGGAATG
TAGCTCACTCGGGGGCTTCTGTGGATTTGGCTATTTTTTCTTTACATCTTGCTGGTGCCT
CTTCTATTCTGGGTGCTATTAATTTTATTTCTACTGTTGGTAATATGCGATCTCCGGGCT
TGGTTGCTGAGCGAATTCCTTTATTTGTTTGAAGGGTTACTGTAACGGCTATTTTGTTGG
TTGCTGCTTTGCCCGTTTTAGCTGGAGCTATTACCATGCTTCTTACCGATCGTAATCTAA
ATACATCGTTTTTCGACCCTACTGGCGGAGGTGATCCTATTTTGTATATACACTTGTTTT
TCGTCTTTTGATAAACCAATATAAAAGATAATGCCTGCCCAGTGAACTTAAACGGCCGCG
TTAGCGTGAGCGTGCTAAGGTAGCGTAATAAATAGCCTTTTAATTGAAGGCCAGTGAATG
GCAAGACTAGGAATTTCTGTACTATAAAAAAAACTTTTCTTCTGGGTGAAAAGCCCCAGA
TCATAAGGAAGACGAAAAGACCCCGCGGAGCTTAACCTAAGAAAATTTGAAAAAAGTAAA
ATCTCATAAGTTTGATTGGGGCAATCATGGAACAGCAAAAACTTCCACTAACTAAAAAAC
CTATAAAAAGCTTAATAAGAACTAAAAAGTAGCTACCCCGGGGATAACAGCGTAATCCAA
TTTGAGAGTACACATCGAAAATTGGGTTTGCGACCTCGATGTTGGCTTAAGGATATCCAT
ATCAGTGCAACCGCTATAACTGGATAGTCTGTTCGACTATTATACCCTTATAAGCGGAGG
AAAAGAAACTAACAAGGATTCCCCCAGTAACGGCGAGTGAAGAGGGAAAAGCCCAGCACC
GAATCCCACGGCCTGGCGTCGTCGGGAAATGTGGTGTATAGGAAGCCTACTTGTCGGCGC
GTGCGGGTACCCAAGTCCTCCTGATCGTGGCCTCTCCCATAGCGGGTGTCAGGCCCATAG
AGGCACCCGTCGTCGTCGGCTTGGAGCTTCCTCGGAGTCGGGTTGTTTGGGAATGCAGCC
CAAAGGGGTGGTAAACTCCATCTAAGGCTAAATACTGCCACGAGTCCGATAGCAAACAAG
TACCGTGAGGGAAAGTTGAAAAGAACTTTGAAGAGAGAGTTCAAGAGTACGTGAAACCGC
TTAGAGGCAAACGGGTGGAGCCGCAATGCGTCGACCCGGGGGATTCAACCAGTGCGTCGG
GACGCGCCGGGGATGCGGAGCTGTAAAGCCCGTGCTTCGGCGTGGTCTCCGGGCGGACTG
GTGCACTTTCCTCGGGCCGATGGCCACGACCGGCTCTCCGCGGCCAAAAGCCAA--GCCG
GGAAGGTGACC------CGCGGTGTTACAGCCCGGCTTG--CGTTGAGCTCGTCGGAGGG
CCGAGGTTGCCGTTCGTCGCCACCCTCGCCATCCTTGCTCGTCACGACTGGGGCGGACTG
CTCCGCCAGTGCTCTCCCGACCGCGAGCGTAGGAAGGGTCGGTACGGTGCGACGTGCTTC
GGGCCAGTGGCGAATCGGTCGGTCCTCCNNNNNNNN
>145_12_T_exolescens
GGACTTTGTACTTGTTGTTGGCTTTGTGGTCTGGGTTAATTGGATTAGCTTTGAGGTTGT
TAATTCGGGCTGAACTAGGGCAGCCAGGAAGTTTGTTAGGGGATGACCAGTTGTATAATG
TGATTGTGACTGCTCATGCATTTATAATAATTTTTTTCTTAGTGATGCCAATAATAATTG
GGGGGTTTGGAAATTGGTTAATTCCTTTAATGATTGGGGCTCCAGATATGGCTTTTCCTC
GTTTAAATAATTTGAGGTTTTGATTGTTGGTGCCTGCTTTGTTTTTGTTACTGAGGTCCT
CTTTGGTTGAGAGAGGTGTGGGAACCGGTTGGACAGTCTATCCTCCGTTGTCTGGGAATG
TAGCTCACTCGGGGGCTTCTGTGGATTTGGCTATTTTTTCTTTACATCTTGCTGGTGCCT
CTTCTATTCTGGGTGCTATTAATTTTATTTCTACTGTTGGTAATATGCGATCTCCGGGCT
TGGTTGCTGAGCGAATTCCTTTATTTGTTTGAAGGGTTACTGTAACGGCTATTTTGTTGG
TTGCTGCTTTGCCCGTTTTAGCTGGAGCTATTACCATGCTTCTTACCGATCGTAATCTAA
ATACATCGTTTTTCGACCCTACTGGCGGAGGTGATCCTATTTTGTATATACACTTGTTTT
TCGTCTTTTGATAAACCAATATAAAAGATAATGCCTGCCCAGTGAACTTAAACGGCCGCG
TTAGCGTGAGCGTGCTAAGGTAGCGTAATAAATAGCCTTTTAATTGAAGGCCAGTGAATG
GCAAGACTAGGAATTTCTGTACTATAAAAAAAACTTTTCTTCTGGGTGAAAAGCCCCAGA
TCATAAGGAAGACGAAAAGACCCCGCGGAGCTTAACCTAAGAAAATTTGAAAAAAGTAAA
ATCTCATAAGTTTGATTGGGGCAATCATGGAACAGCAAAAACTTCCACTAACTAAAAAAC
CTATAAAAAGCTTAATAAGAACTAAAAAGTAGCTACCCCGGGGATAACAGCGTAATCCAA
TTTGAGAGTACACATCGAAAATTGGGTTTGCGACCTCGATGTTGGCTTAAGGATATCCAT
ATCAGTGCAACCGCTATAACTGGATAGTCTGTTCGACTATTATACCCTTATAAGCGGAGG
AAAAGAAACTAACAAGGATTCCCCCAGTAACGGCGAGTGAAGAGGGAAAAGCCCAGCACC
GAATCCCACGGCCTGGCGTCGTCGGGAAATGTGGTGTATAGGAAGCCTACTTGTCGGCGC
GTGCGGGTACCCAAGTCCTCCTGATCGTGGCCTCTCCCATAGCGGGTGTCAGGCCCATAG
AGGCACCCGTCGTCGTCGGCTTGGAGCTTCCTCGGAGTCGGGTTGTTTGGGAATGCAGCC
CAAAGGGGTGGTAAACTCCATCTAAGGCTAAATACTGCCACGAGTCCGATAGCAAACAAG
TACCGTGAGGGAAAGTTGAAAAGAACTTTGAAGAGAGAGTTCAAGAGTACGTGAAACCGC
TTAGAGGCAAACGGGTGGAGCCGCAATGCGTCGACCCGGGGGATTCAACCAGTGCGTCGG
GACGCGCCGGGGATGCGGAGCTGTAAAGCCCGTGCTTCGGCGTGGTCTCCGGGCGGACTG
GTGCACTTTCCTCGGGCCGATGGCCACGACCGGCTCTCCGCGGCCAAAAGCCAA--GCCG
GGAAGGTGACC------CGCGGTGTTACAGCCCGGCTTG--CGTTGAGCTCGTCGGAGGG
CCGAGGTTGCCGTTCGTCGCCACCCTCGCCATCCTTGCTCGTCACGACTGGGGCGGACTG
CTCCGCCAGTGCTCTCCCGACCGCGAGCGTAGGAAGGGTCGGTACGGTGCGACGTGCTTC
GGGCCAGTGGCGAATCGGTCGGTCCTCCNNNNNNNN
>146_23_T_exolescens
GGACTTTGTACTTGTTGTTGGCTTTGTGGTCTGGGTTAATTGGATTAGCTTTAAGGTTGT
TAATTCGGGCTGAACTAGGGCAGCCAGGAAGTTTGTTAGGGGATGACCAGTTGTATAATG
TGATTGTGACTGCTCATGCATTTATAATAATTTTTTTCTTAGTGATGCCAATAATAATTG
GGGGGTTTGGAAATTGGTTAATTCCTTTAATGATTGGGGCTCCAGATATGGCTTTTCCTC
GTTTAAATAATTTGAGGTTTTGATTGTTGGTGCCTGCTTTGTTTTTGTTACTGAGGTCCT
CTTTGGTTGAGAGAGGTGTGGGAACCGGTTGGACAGTCTATCCTCCGTTGTCTGGGAATG
TAGCTCACTCGGGGGCTTCTGTGGATTTGGCTATTTTTTCTTTACATCTTGCTGGTGCCT
CTTCTATTCTGGGTGCTATTAATTTTATTTCTACTGTTGGTAATATGCGATCTCCGGGCT
TGGTTGCTGAGCGAATTCCTTTATTTGTTTGAAGGGTTACTGTAACGGCTATTTTGTTGG
TTGCTGCTTTGCCCGTTTTAGCTGGAGCTATTACCATGCTTCTTACCGATCGTAATTTAA
ATACATCGTTTTTCGACCCTACTGGCGGAGGTGATCCTATTTTGTATATACACTTGTTTT
TCGTCTTTTGATAAACCAATATAAAAGATAATGCCTGCCCAGTGAACTTAAACGGCCGCG
TTAGCGTGAGCGTGCTAAGGTAGCGTAATAAATAGCCTTTTAATTGAAGGCCAGTGAATG
GCAAGACTAGGAATTTCTGTACTATAAAAAAAACTTTTCTTCTGGGTGAAAAGCCCCAGA
TCATAAGGAAGACGAAAAGACCCCGCGGAGCTTAACCTAAGAAAATTTGAAAAAAGTAAA
ATCTCATAAGTTTGATTGGGGCAATCATGGAACAGCAAAAACTTCCACTAACTAAAAAAC
CTATAAAAAGCTTAATAAGAACTAAAAAGTAGCTACCCCGGGGATAACAGCGTAATCCAA
TTTGAGAGTACACATCGAAAATTGGGTTTGCGACCTCGATGTTGGCTTAAGGATATCCAT
ATCAGTGCAACCGCTATAACTGGATAGTCTGTTCGACTATTATACCCTTATAAGCGGAGG
AAAAGAAACTAACAAGGATTCCCCCAGTAACGGCGAGTGAAGAGGGAAAAGCCCAGCACC
GAATCCCACGGCCTGGCGTCGTCGGGAAATGTGGTGTATAGGAAGCCTACTTGTCGGCGC
GTGCGGGTACCCAAGTCCTCCTGATCGTGGCCTCTCCCATAGCGGGTGTCAGGCCCATAG
AGGCACCCGTCGTCGTCGGCTTGGAGCTTCCTCGGAGTCGGGTTGTTTGGGAATGCAGCC
CAAAGGGGTGGTAAACTCCATCTAAGGCTAAATACTGCCACGAGTCCGATAGCAAACAAG
TACCGTGAGGGAAAGTTGAAAAGAACTTTGAAGAGAGAGTTCAAGAGTACGTGAAACCGC
TTAGAGGCAAACGGGTGGAGCCGCAATGCGTCGACCCGGGGGATTCAACCAGTGCGTCGG
GACGCGCCGGGGATGCGGAGCTGTAAAGCCCGTGCTTCGGCGTGGTCTCCGGGCGGACTG
GTGCACTTTCCTCGGGCCGATGGCCACGACCGGCTCTCCGCGGCCAAAAGCCAA--GCCG
GGAAGGTGACC------CGCGGTGTTACAGCCCGGCTTG--CGTTGAGCTCGTCGGAGGG
CCGAGGTTGCCGTTCGTCGCCACCCTCGCCATCCTTGCTCGTCACGACTGGGGCGGACTG
CTCCGCCAGTGCTCTCCCGACCGCGAGCGTAGGAAGGGTCGGTACGGTGCGACGTGCTTC
GGGCCAGTGGCGAATCGGTCGGTCCTCCNNNNNNNN
>630_1_T_scutum
GGACTTTGTATTTGTTGTTGGCTTTGTGATCTGGGTTAATTGGATTGGCTTTAAGGTTGT
TAATTCGAGCTGAACTAGGGCAGCCAGGAAGTTTGTTAGGGGATGATCAGTTGTATAATG
TAATTGTGACTGCCCATGCATTTATAATAATTTTCTTTTTAGTGATGCCAATAATAATCG
GGGGGTTTGGAAATTGGTTAATTCCTTTAATGATTGGGGCTCCAGATATGGCTTTTCCTC
GTTTAAATAATTTGAGGTTTTGATTGTTGGTGCCTGCTTTGTTTTTGTTACTGAGGTCCT
CTTTGGTAGAGAGAGGTGTGGGAACTGGTTGGACGGTCTATCCTCCGTTGTCTGGGAATG
TAGCTCATTCGGGGGCTTCTGTGGATTTGGCTATTTTTTCTTTACATCTTGCTGGTGCTT
CTTCTATTCTGGGTGCTATTAACTTTATTTCTACTGTTGGTAATATGCGATCTCCGGGCT
TGGTTGCTGAGCGAATTCCTTTATTTGTTTGAAGGGTTACTGTAACGGCTATTTTGTTGG
TTGCTGCTTTGCCTGTTTTAGCTGGAGCTATTACCATGCTTCTTACCGATCGTAATTTAA
ATACATCGTTTTTCGATCCTACTGGTGGAGGTGATCCAATTTTGTACATACATTTGTTTT
TCGTCTTTTGATGGACCAATATAAAAGATAATGCCTGCCCAGTGAACTTAAACGGCCGCG
TTAGCGTGAGCGTGCTAAGGTAGCGTAATAAATAGCCTTTTAATTGAAGGCCAGTGAATG
GCAAGACTAGGAATTTCTGTACTATAAAAAAAACTTTTCTTCTGGGTGAAAAGCCCCAGA
TCATAAGGAAGACGAAAAGACCCCGCGGAGCTTAACCTAAGAAAATTTAAAAAAAGTAAA
ATCTCATAAGTTTGATTGGGGCAATCACGGAACAGCAAAAACTTCCACTAACTAAAAGAC
CTATAAAAAGCTTAGTAAGAACTAAAAAGTAGCTACCCCGGGGATAACAGCGTAATCCAA
TTTGAGAGTACACATCGAAAATTGGGTTTGCGACCTCGATGTTGGCTTAGGGATATCCAT
ATCAGTGCAACCGCTATAACTGGATAGTCTGTTCGACTATTATACCCTTATAAGCGGAGG
AAAAGAAACTAACAAGGATTCCCCCAGTAACGGCGAGTGAAGAGGGAAAAGCCCAGCACC
GAATCCCACGGCCTGGCGTCGTCGGGAAATGTGGTGTATAGGAAGCCTACTTGTCGGCGC
GTGCGGGTACCCAAGTCCTCCTGATCGTGGCCTCTCCCATAGCGGGTGTCAGGCCCATAG
AGGCACCCGTCGTCGTCGGCTTGGAGCTTCCTCGGAGTCGGGTTGTTTGGGAATGCAGCC
CAAAGGGGTGGTAAACTCCATCTAAGGCTAAATACTGCCACGAGTCCGATAGCAAACAAG
TACCGTGAGGGAAAGTTGAAAAGAACTTTGAAGAGAGAGTTCAAGAGTACGTGAAACCGC
TTAGAGGCAAACGGGTGGAGCCGCAATGCGTCGACCCGGGGGATTCAACCAGTGCGTCGG
GACGCGCCGGGGGTGCGGAGCTGTAAAGCCCGTGCTTCGGCGTGGTCTCCGGGCGGACTG
GTGCACTTTCCTCGGGCCGATGGCCACGACCGGCTCTCCGCGGCCAAAAGCCAA--GCCG
GGAAGGTGACCCTGCGCCGCGGTGTTATAGCCCGGCTTG--CGTTGAGCTCGTCGGAGGG
CCGAGGTTGCCGTTCGTCGCCACCCTCGCCATCCTTGCTCGTCACGACTGGGGCGGACTG
CTCTGCCAGTGCTCTCCCGACCGCGAGCGTAGGAAGGGTCGGTACGGTGCGACGTGCTTC
GGGCCAGTGGCGAATCGGTCGGTCCTCCACCCGACC
>632_1_T_scutum
GGACTTTGTATTTGTTGTTGGCTTTGTGATCTGGGTTAATTGGATTGGCTTTAAGGTTGT
TAATTCGAGCTGAACTAGGGCAGCCAGGAAGTTTGTTAGGGGATGATCAGTTGTATAATG
TAATTGTGACTGCCCATGCATTTATAATAATTTTCTTTTTAGTGATGCCAATAATAATCG
GGGGGTTTGGAAATTGGTTAATTCCTTTAATGATTGGGGCTCCAGATATGGCTTTTCCTC
GTTTAAATAATTTGAGGTTTTGATTGTTGGTGCCTGCTTTGTTTTTGTTACTGAGGTCCT
CTTTGGTAGAGAGAGGTGTGGGAACTGGTTGGACGGTCTATCCTCCGTTGTCTGGGAATG
TAGCTCATTCGGGGGCTTCTGTGGATTTGGCTATTTTTTCTTTACATCTTGCTGGTGCTT
CTTCTATTCTGGGTGCTATTAACTTTATTTCTACTGTTGGTAATATGCGATCTCCGGGCT
TGGTTGCTGAGCGAATTCCTTTATTTGTTTGAAGGGTTACTGTAACGGCTATTTTGTTGG
TTGCTGCTTTGCCTGTTTTAGCTGGAGCTATTACCATGCTTCTTACCGATCGTAATTTAA
ATACATCGTTTTTCGATCCTACTGGTGGAGGTGATCCAATTTTGTACATACATTTGTTTT
TCGTCTTTTGATGGACCAATATAAAAGATAATGCCTGCCCAGTGAACTTAAACGGCCGCG
TTAGCGTGAGCGTGCTAAGGTAGCGTAATAAATAGCCTTTTAATTGAAGGCCAGTGAATG
GCAAGACTGGGAATTTCTGTACTATAAAAAAAACTTTTCTTCTGGGTGAAAAGCCCCAGA
TCATAAGGAAGACGAAAAGACCCCGCGGAGCTTAACCTAAGAAAATTTAAAAAAAGTAAA
ATCTCATAAGTTTGATTGGGGCAATCACGGAACAGCAAAAACTTCCACTAACTAAAAGAC
CTATAAAAAGCTTAGTAAGAACTAAAAAGTAGCTACCCCGGGGATAACAGCGTAATCCAA
TTTGAGAGTACACATCGAAAATTGGGTTTGCGACCTCGATGTTGGCTTAGGGATATCCAT
ATCAGTGCAACCGCTATAACTGGATAGTCTGTTCGACTATTATACCCTTATAAGCGGAGG
AAAAGAAACTAACAAGGATTCCCCCAGTAACGGCGAGTGAAGAGGGAAAAGCCCAGCACC
GAATCCCACGGCCTGGCGTCGTCGGGAAATGTGGTGTATAGGAAGCCTACTTGTCGGCGC
GTGCGGGTACCCAAGTCCTCCTGATCGTGGCCTCTCCCATAGCGGGTGTCAGGCCCATAG
AGGCACCCGTCGTCGTCGGCTTGGAGCTTCCTCGGAGTCGGGTTGTTTGGGAATGCAGCC
CAAAGGGGTGGTAAACTCCATCTAAGGCTAAATACTGCCACGAGTCCGATAGCAAACAAG
TACCGTGAGGGAAAGTTGAAAAGAACTTTGAAGAGAGAGTTCAAGAGTACGTGAAACCGC
TTAGAGGCAAACGGGTGGAGCCGCAATGCGTCGACCCGGGGGATTCAACCAGTGCGTCGG
GACGCGCCGGGGGTGCGGAGCTGTAAAGCCCGTGCTTCGGCGTGGTCTCCGGGCGGACTG
GTGCACTTTCCTCGGGCCGATGGCCACGACCGGCTCTCCGCGGCCAAAAGCCAA--GCCG
GGAAGGTGACCCTGCGCCGCGGTGTTATAGCCCGGCTTG--CGTTGAGCTCGTCGGAGGG
CCGAGGTTGCCGTTCGTCGCCACCCTCGCCATCCTTGCTCGTCACGACTGGGGCGGACTG
CTCTGCCAGTGCTCTCCCGACCGCGAGCGTAGGAAGGGTCGGTACGGTGCGACGTGCTTC
GGGCCAGTGGCGAATCGGTCGGTCCTCCACCCGACC
>616_1_T_yeti
GGACTTTGTACTTGTTGTTGGCTTTGTGATCTGGGTTAATTGGGTTGGCTTTAAGGTTGT
TAATTCGGGCTGAATTAGGGCAGCCAGGAAGTTTGTTAGGGGATGATCAGTTGTACAATG
TAATTGTGACTGCTCATGCATTTATAATAATTTTCTTTTTAGTGATGCCAATAATAATTG
GGGGGTTTGGAAATTGGTTAATTCCTTTAATGATTGGGGCTCCAGATATGGCTTTTCCTC
GTTTAAATAATTTGAGATTTTGATTGTTGGTGCCTGCTTTGTTTTTATTACTGAGGTCCT
CTTTGGTTGAGAGGGGTGTGGGAACTGGTTGGACAGTCTATCCCCCGTTGTCTGGGAATG
TAGCTCACTCGGGGGCTTCTGTGGATTTGGCTATTTTTTCTTTACACCTTGCAGGTGCTT
CCTCTATTCTGGGTGCTATTAATTTTATTTCTACTGTTGGTAATATGCGATCTCCGGGCT
TGGTTGCTGAGCGAATTCCTTTATTTGTTTGAAGGGTTACTGTAACGGCTATTTTGTTGG
TTGCTGCTTTGCCTGTTTTAGCTGGAGCTATTACCATGCTTCTTACTGACCGTAATTTAA
ATACATCGTTTTTTGACCCTACTGGTGGAGGTGATCCTATTTTGTATATACACTTGTTTT
TCGTCTTTTGATGAACCATTATAAAAGATAATGCCTGCCCAGTGAATTTAAACGGCCGCG
TTAGCGTGAGCGTGCTAAGGTAGCGTAATAAATAGCCTTTTAATTGAAGGCCAGTGAATG
GCAAGACTAGGAATTTCTGTACTATAAAAAAAACTTTTCTTCTGGGTGAAAAGCCCCAGA
TCATAAGGAAGACGAAAAGACCCCGCGGAGCTTAACCTAAGAAAATTTAAAAAAAGTAAA
ATCTCACAAGTTTGATTGGGGCAATCATGGAACAGCAAAAACTTCCACTAACTAAAAGAC
CTATAAAAAGCTAAATAAGAACTAAAAAGTAGCTACCCCGGGGATAACAGCGTAATCCAA
TCTGAGAGTACACATCGAAAATTGGGTTTGCGACCTCGATGTTGGCTTAGGGATATCCAT
ATCAGTGCAACCGCTATAACCGGATAGTCTGTTCGACTATTATACCCCTATAAGCGGAGG
AAAAGAAACTAACAAGGATTCCCCCAGTAACGGCGAGTGAAGAGGGAAAAGCCCAGCACC
GAATCCCACGGCCTGGCGTCGTCGGGAAATGTGGTGTATAGGAAGCCTACTTGTCGGCGC
GTGCGGGTACCCAAGTCCTCCTGATCGTGGCCTCTCCCATAGCGGGTGTCAGGCCCATAG
AGGCACCCGTCGTCGTCGGCTTGGAGCTTCCTCGGAGTCGGGTTGTTTGGGAATGCAGCC
CAAAGGGGTGGTAAACTCCATCTAAGGCTAAATACTGCCACGAGTCCGATAGCAAACAAG
TACCGTGAGGGAAAGTTGAAAAGAACTTTGAAGAGAGAGTTCAAGAGTACGTGAAACCGC
TTAGAGGCAAACGGGTGGAGCCGCAATGCGTCGACCCGGGGGATTCAACCAGTGCGTCGG
GACGCGCCGGGGATGCGGAGCTGTAAAGCCCGTGCTTCGGCGTGGTCTCCGGGCGGACTG
GTGCACTTTCCTCGGGCCGATGGCCACGACCGGCTCTCCGCGGCCAAAAGCCAA--GCCG
GGAAGGTGACCCTGCGCCGCGGTGTTATAGCCCGGCTTG--CGTTGAGCTCGTCGGAGGG
CCGAGGTTGCCGTTCGTCGCCACCCTCGCCATCCTTGCTCGTCACGACTGGGGCGGACTG
CTCTGCCAGTGCTCTCCCGACCGCGAGCGTAGGAAGGGTCGGTACGGTGCGACGTGCTTC
GGGCCAGTGGCGAATCGGTCGGTCCTCCACCCGACC
>250_8_T_angustior
GGACTTTATACTTGTTGTTGGCTTTGTGATCTGGGTTAATTGGGTTGGCTTTAAGGTTGT
TAATCCGGGCTGAATTAGGGCAGCCAGGAAGTTTGTTAGGGGATGATCAGTTGTACAATG
TAATTGTAACTGCTCATGCATTTATAATAATTTTCTTTTTAGTGATGCCAATAATAATTG
GGGGGTTTGGAAATTGGTTAATTCCTTTAATGATTGGGGCTCCAGATATGGCTTTTCCTC
GTTTAAATAATTTGAGGTTTTGATTGTTGGTGCCTGCTTTGTTTTTATTACTTAGGTCCT
CTTTGGTTGAGAGTGGTGTGGGAACTGGTTGGACAGTCTATCCTCCGTTGTCTGGGAATG
TAGCTCACTCGGGGGCTTCTGTGGATTTGGCTATTTTTTCTTTACACCTTGCGGGTGCTT
CCTCTATTTTGGGTGCTATTAATTTTATTTCTACTGTTGGTAATATGCGATCTCCGGGCT
TGGTTGCTGAGCGAATTCCTTTATTTGTTTGAAGGGTTACTGTAACGGCTATTTTGTTGG
TTGCTGCTTTGCCTGTTTTAGCTGGAGCTATTACTATGCTTCTTACTGACCGTAATCTAA
ATACATCGTTTTTCGACCCTACTGGTGGAGGTGATCCTATTTTGTATATACACTTGTTTT
TCGTCTTTTGATAAACCATTATAAGAGATAATGCCTGCCCAGTGAATTTAAACGGCCGCG
TTAGCGTGAGCGTGCTAAGGTAGCGTAATAAATAGCCTTTTAATTGAAGGCCAGTGAATG
GCAAGACTAGGAATTTCTGTACTATAAAAAAAACTTTTCTTCTGGGTGAAAAGCCCCAGA
TCATAAGGAAGACGAAAAGACCCCGCGGAGCTTAACCTAAGAAAATTTAAAAAAAGTAAA
ATCTCACAAGTTTGATTGGGGCAATCATGGAACAGCAAAAACTTCCACTAACTAAAAGAC
CTATAAAAAGCTAAATAAGAACTAAAAAGTAGCTACCCCGGGGATAACAGCGTAATCCAA
TTTGAGAGTACACATCGAAAATTGGGTTTGCGACCTCGATGTTGGCTTAGGGATATCCAT
ATCAGTGCAACCGCTATAACCGGATAGTCTGTTCGACTATTATACCCTTATAAGCGGAGG
AAAAGAAACTAACAAGGATTCCCCCAGTAACGGCGAGTGAAGAGGGAAAAGCCCAGCACC
GAATCCCACGGCCTGGCGTCGTCGGGAAATGTGGTGTATAGGAAGCCTACTTGTCGGCGC
GTGCGGGTACCCAAGTCCTCCTGATCGTGGCCTCTCCCATAGCGGGTGTCAGGCCCATAG
AGGCACCCGTCGTCGTCGGCTTGGAGCTTCCTCGGAGTCGGGTTGTTTGGGAATGCAGCC
CAAAGGGGTGGTAAACTCCATCTAAGGCTAAATACTGCCACGAGTCCGATAGCAAACAAG
TACCGTGAGGGAAAGTTGAAAAGAACTTTGAAGAGAGAGTTCAAGAGTACGTGAAACCGC
TTAGAGGCAAACGGGTGGAGCCGCAATGCGTCGACCCGGGGGATTCAACCAGTGCGTCGG
GACGCGCCGGGGATGCGGAGCTGTAAAGCCCGTGCTTCGGCGTGGTCTCCGGGCGGACTG
GTGCACTTTCCTCGGGCCGATGGCCACGACCGGCTCTCCGCGGCCAAAAGCCAA--GCCG
GGAAGGTGACCCTGCGCCGCGGTGTTACAGCCCGGCTTG--CGTTGAGCTCGTCGGAGGG
CCGAGGTTGCCGTTCGTCGCCACCCTCGCCATCCTTGCTCGTCACGACTGGGGCGGACTG
CTCTGCCAGTGCTCTCCCGACCGCGAGCGTAGGAAGGGTCGGTACGGTGCGACGTGCTTC
GGGCCAGTGGCGAATCGGTCGGTCCTCCACCCGACC
>370_1_T_angustior
GGACTTTATACTTGTTGTTGGCTTTGTGATCTGGGTTAATTGGGTTGGCTTTAAGGTTGT
TAATCCGGGCTGAATTAGGGCAGCCAGGAAGTTTGTTAGGGGATGATCAGTTGTACAATG
TAATTGTAACTGCTCATGCATTTATAATAATTTTCTTTTTAGTGATGCCAATAATAATTG
GGGGGTTTGGAAATTGGTTAATTCCTTTAATGATTGGGGCTCCAGATATGGCTTTTCCTC
GTTTAAATAATTTGAGGTTTTGATTGTTGGTGCCTGCTTTGTTTTTATTACTTAGGTCCT
CTTTGGTTGAGAGTGGTGTGGGAACTGGTTGGACAGTCTATCCTCCGTTGTCTGGGAATG
TAGCTCACTCGGGGGCTTCTGTGGATTTGGCTATTTTTTCTTTACACCTTGCGGGTGCTT
CCTCTATTTTGGGTGCTATTAATTTTATTTCTACTGTTGGTAATATGCGATCTCCGGGCT
TGGTTGCTGAGCGAATTCCTTTATTTGTTTGAAGGGTTACTGTAACGGCTATTTTGTTGG
TTGCTGCTTTGCCTGTTTTAGCTGGAGCTATTACCATGCTTCTTACTGACCGTAATCTAA
ATACATCGTTTTTCGACCCTACTGGCGGAGGTGATCCTATTTTGTATATACACTTGTTTT
TCGTCTTTTGATAAACCATTATAAAAGATAATGCCTGCCCAGTGAATTTAAACGGCCGCG
TTAGCGTGAGCGTGCTAAGGTAGCGTAATAAATAGCCTTTTAATTGAAGGCCAGTGAATG
GCAAGACTAGGAATTTCTGTACTATAAAAAAAACTTTTCTTCTGGGTGAAAAGCCCCAGA
TCATAAGGAAGACGAAAAGACCCCGCGGAGCTTAACCTAAGAAAATTTAAAAAAAGTAAA
ATCTCACAAGTTTGATTGGGGCAATCATGGAACAGCAAAAACTTCCACTAACTAAAAGAC
CTATAAAAAGCTAAATAAGAACTAAAAAGTAGCTACCCCGGGGATAACAGCGTAATCCAA
TTTGAGAGTACACATCGAAAATTGGGTTTGCGACCTCGATGTTGGCTTAGGGATATCCAT
ATCAGTGCAACCGCTATAACCGGATAGTCTGTTCGACTATTATACCCTTATAAGCGGAGG
AAAAGAAACTAACAAGGATTCCCCCAGTAACGGCGAGTGAAGAGGGAAAAGCCCAGCACC
GAATCCCACGGCCTGGCGTCGTCGGGAAATGTGGTGTATAGGAAGCCTACTTGTCGGCGC
GTGCGGGTACCCAAGTCCTCCTGATCGTGGCCTCTCCCATAGCGGGTGTCAGGCCCATAG
AGGCACCCGTCGTCGTCGGCTTGGAGCTTCCTCGGAGTCGGGTTGTTTGGGAATGCAGCC
CAAAGGGGTGGTAAACTCCATCTAAGGCTAAATACTGCCACGAGTCCGATAGCAAACAAG
TACCGTGAGGGAAAGTTGAAAAGAACTTTGAAGAGAGAGTTCAAGAGTACGTGAAACCGC
TTAGAGGCAAACGGGTGGAGCCGCAATGCGTCGACCCGGGGGATTCAACCAGTGCGTCGG
GACGCGCCGGGGATGCGGAGCTGTAAAGCCCGTGCTTCGGCGTGGTCTCCGGGCGGACTG
GTGCACTTTCCTCGGGCCGATGGCCACGACCGGCTCTCCGCGGCCAAAAGCCAA--GCCG
GGAAGGTGACCCTGCGCCGCGGTGTTATAGCCCGGCTTG--CGTTGAGCTCGTCGGAGGG
CCGAGGTTGCCGTTCGTCGCCACCCTCGCCATCCTTGCTCGTCACGACTGGGGCGGACTG
CTCTGCCAGTGCTCTCCCGACCGCGAGCGTAGGAAGGGTCGGTACGGTGCGACGTGCTTC
GGGCCAGTGGCGAATCGGTCGGTCCTCCACCCGACC
>394_1_T_angustior
GGACTTTATACTTGTTGTTGGCTTTGTGATCTGGGTTAATTGGGTTGGCTTTAAGGTTGT
TAATCCGGGCTGAATTAGGGCAGCCAGGAAGTTTGTTAGGGGATGATCAGTTGTACAATG
TAATTGTAACTGCTCATGCATTTATAATAATTTTCTTTTTAGTGATGCCAATAATAATTG
GGGGGTTTGGAAATTGGTTAATTCCTTTAATGATTGGGGCTCCAGATATGGCTTTTCCTC
GTTTAAATAATTTGAGGTTTTGATTGTTGGTGCCTGCTTTGTTTTTATTACTTAGGTCCT
CTTTGGTTGAGAGTGGTGTGGGAACTGGTTGGACAGTCTATCCTCCGTTGTCTGGGAATG
TAGCTCACTCGGGGGCTTCTGTGGATTTGGCTATTTTTTCTTTACACCTTGCGGGTGCTT
CCTCTATTTTGGGTGCTATTAATTTTATTTCTACTGTTGGTAATATGCGATCTCCGGGCT
TGGTTGCTGAGCGAATTCCCTTATTTGTTTGAAGGGTTACTGTAACGGCTATTTTGTTGG
TTGCTGCTTTGCCTGTTTTAGCTGGAGCTATTACCATGCTTCTTACTGACCGTAATCTAA
ATACATCGTTTTTCGACCCTACTGGTGGAGGTGATCCTATTTTGTATATACACTTGTTTT
NNNNNNNNNNNNNNNNNNNNNNNNNNNNNNNNNNNNNNNNNNNNNNNNNNNNNNNNNNNN
NNNNNNNNNNNNNNNNNNNNNNNNNNNNNNNNNNNNNNNNNNNNNNNNNNNNNNNNNNNN
NNNNNNNNNNNNNNNNNNNNNNNNNNNNNNNNNNNNNNNNNNNNNNNNNNNNNNNNNNNN
NNNNNNNNNNNNNNNNNNNNNNNNNNNNNNNNNNNNNNNNNNNNNNNNNNNNNNNNNNNN
NNNNNNNNNNNNNNNNNNNNNNNNNNNNNNNNNNNNNNNNNNNNNNNNNNNNNNNNNNNN
NNNNNNNNNNNNNNNNNNNNNNNNNNNNNNNNNNNNNNNNNNNNNNNNNNNNNNNNNNNN
NNNNNNNNNNNNNNNNNNNNNNNNNNNNNNNNNNNNNNNNNNNNNNNNNNNNNNNNNNNN
NNNNNNNNNNNNNNNNNNNNNNNNNNNNNNNNNNNNNNNNNNNNNNNNNNNNNNNNNNNN
NNNNNNNNNNNNNNNNNNNNNNNNNNNNNNNNNNNNNNNNNNNNNNNNNNNNNNNNNNNN
NNNNNNNNNNNNNNNNNNNNNNNNNNNNNNNNNNNNNNNNNNNNNNNNNNNNNNNNNNNN
NNNNNNNNNNNNNNNNNNNNNNNNNNNNNNNNNNNNNNNNNNNNNNNNNNNNNNNNNNNN
NNNNNNNNNNNNNNNNNNNNNNNNNNNNNNNNNNNNNNNNNNNNNNNNNNNNNNNNNNNN
NNNNNNNNNNNNNNNNNNNNNNNNNNNNNNNNNNNNNNNNNNNNNNNNNNNNNNNNNNNN
NNNNNNNNNNNNNNNNNNNNNNNNNNNNNNNNNNNNNNNNNNNNNNNNNNNNNNNNNNNN
NNNNNNNNNNNNNNNNNNNNNNNNNNNNNNNNNNNNNNNNNNNNNNNNNNNNNNNNNNNN
NNNNNNNNNNNNNNNNNNNNNNNNNNNNNNNNNNNNNNNNNNNNNNNNNNNNNNNNNNNN
NNNNNNNNNNNNNNNNNNNNNNNNNNNNNNNNNNNNNNNNNNNNNNNNNNNNNNNNNNNN
NNNNNNNNNNNNNNNNNNNNNNNNNNNNNNNNNNNNNNNNNNNNNNNNNNNNNNNNNNNN
NNNNNNNNNNNNNNNNNNNNNNNNNNNNNNNNNNNNNNNNNNNNNNNNNNNNNNNNNNNN
NNNNNNNNNNNNNNNNNNNNNNNNNNNNNNNNNNNNNNNNNNNNNNNNNNNNNNNNNNNN
NNNNNNNNNNNNNNNNNNNNNNNNNNNNNNNNNNNN
>336_3_T_dolichorhynchus
GGACTTTGTATTTGTTGTTGGCTTTGTGATCTGGGTTAATTGGGTTGGCTTTAAGGTTGT
TAATTCGGGCTGAATTAGGGCAGCCAGGAAGTTTGTTAGGGGATGATCAGTTGTACAACG
TAATTGTGACTGCTCATGCATTTATAATAATTTTCTTTTTAGTGATGCCAATAATAATTG
GGGGGTTTGGAAATTGGTTAATTCCTTTAATGATTGGGGCTCCAGATATGGCTTTTCCTC
GTTTAAATAATTTGAGGTTTTGATTGTTGGTGCCTGCTTTGTTTTTATTACTGAGGTCCT
CTTTGGTTGAGAGAGGTGTGGGAACTGGTTGGACAGTCTACCCTCCGTTGTCTGGGAATG
TAGCTCACTCGGGAGCTTCTGTGGATTTGGCTATTTTTTCTTTACACCTTGCGGGTGCTT
CCTCTATTCTGGGTGCTATTAATTTTATTTCTACTGTTGGTAATATGCGATCTCCGGGTT
TGGTTGCTGAGCGAATTCCTTTATTTGTTTGAAGGGTTACTGTAACAGCTATTTTGTTGG
TTGCTGCTTTGCCTGTTTTAGCTGGAGCGATTACCATGCTTCTTACTGACCGTAATCTAA
ATACATCGTTTTTCGATCCTACTGGTGGAGGTGATCCTATTTTGTATATACACTTGTTTT
NNNNNNNNNNNNNNNNNNNNNNNNNNNNNNNNNNNNNNNNNNNNNNNNNNNNNNNNNNNN
NNNNNNNNNNNNNNNNNNNNNNNNNNNNNNNNNNNNNNNNNNNNNNNNNNNNNNNNNNNN
NNNNNNNNNNNNNNNNNNNNNNNNNNNNNNNNNNNNNNNNNNNNNNNNNNNNNNNNNNNN
NNNNNNNNNNNNNNNNNNNNNNNNNNNNNNNNNNNNNNNNNNNNNNNNNNNNNNNNNNNN
NNNNNNNNNNNNNNNNNNNNNNNNNNNNNNNNNNNNNNNNNNNNNNNNNNNNNNNNNNNN
NNNNNNNNNNNNNNNNNNNNNNNNNNNNNNNNNNNNNNNNNNNNNNNNNNNNNNNNNNNN
NNNNNNNNNNNNNNNNNNNNNNNNNNNNNNNNNNNNNNNNNNNNNNNNNNNNNNNNNNNN
NNNNNNNNNNNNNNNNNNNNNNNNNNNNNNNNNNNNNNNNNNNNNNNNNNTAAGCGGAGG
AAAAGAAACTAACAAGGATTCCCCCAGTAACGGCGAGTGAAGAGGGAAAAGCCCAGCACC
GAATCCCACGGCCTGGCGTCGTCGGGAAATGTGGTGTATAGGAAGCCTACTTGTCGGCGC
GTGCGGGTACCCAAGTCCTCCTGATCGTGGCCTCTCCCATAGCGGGTGTCAGGCCCATAG
AGGCACCCGTCGTCGTCGGCTTGGAGCTTCCTCGGAGTCGGGTTGTTTGGGAATGCAGCC
CAAAGGGGTGGTAAACTCCATCTAAGGCTAAATACTGCCACGAGTCCGATAGCAAACAAG
TACCGTGAGGGAAAGTTGAAAAGAACTTTGAAGAGAGAGTTCAAGAGTACGTGAAACCGC
TTAGAGGCAAACGGGTGGAGCCGCAATGCGTCGACCCGGGGGATTCAACCAGTGCGTCGG
GACGCGCCGGGGGTGCGGAGCTGTAAAGCCCGTGCTTCGGCGTGGTCTCCGGGCGGACTG
GTGCACTTTCCTCGGGCCGATGGCCACGACCGGCTCTCCGCGGCCAAAAGCCAA--GCCG
GGAAGGTGACCCTGCGCCGCGGTGTTATAGCCCGGCTTG--CGTTGAGCTCGTCGGAGGG
CCGAGGTTGCCGTTCGTCGCCACCCTCGCCATCCTTGCTCGTCACGACTGGGGCGGACTG
CTCTGCCAGTGCTCTCCCGACCGCGAGCGTAGGAAGGGTCGGTACGGTGCGACGTGCTTC
GGGCCAGTGGCGAATCGGTCGGTCCTCCACCCGACC
>353_T_dolichorhynchus
GGACTTTGTATTTGTTGTTGGCTTTGTGATCTGGGTTAATTGGGTTGGCTTTAAGGTTGT
TAATTCGGGCTGAATTAGGGCAGCCAGGAAGTTTGTTAGGGGATGATCAGTTGTACAATG
TAATTGTGACTGCTCATGCATTTATAATAATTTTCTTTTTAGTGATGCCAATAATAATTG
GGGGGTTTGGAAATTGGTTAATTCCTTTAATGATTGGGGCTCCAGATATGGCTTTTCCTC
GTTTAAATAATTTGAGGTTTTGATTGTTGGTGCCTGCTTTGTTTTTATTACTAAGGTCCT
CTTTGGTTGAGAGAGGTGTGGGAACTGGTTGGACAGTCTACCCTCCGTTGTCTGGGAATG
TAGCTCACTCGGGAGCTTCTGTGGATTTAGCTATTTTTTCTTTACACCTTGCGGGTGCTT
CCTCTATTCTGGGTGCTATTAATTTTATTTCTACTGTTGGTAATATGCGATCTCCGGGTT
TGGTTGCTGAGCGAATTCCTTTATTTGTTTGAAGGGTTACTGTAACGGCTATTTTGTTGG
TTGCTGCTTTGCCTGTTTTAGCTGGAGCGATTACCATGCTTCTTACTGACCGTAATCTAA
ATACATCGTTTTTCGATCCTACTGGTGGAGGTGATCCTATTTTGTATATACACTTGTTTT
NNNNNNNNNNNNNNNNNNNNNNNNNNNNNNNNNNNNNNNNNNNNNNNNNNNNNNNNNNNN
NNNNNNNNNNNNNNNNNNNNNNNNNNNNNNNNNNNNNNNNNNNNNNNNNNNNNNNNNNNN
NNNNNNNNNNNNNNNNNNNNNNNNNNNNNNNNNNNNNNNNNNNNNNNNNNNNNNNNNNNN
NNNNNNNNNNNNNNNNNNNNNNNNNNNNNNNNNNNNNNNNNNNNNNNNNNNNNNNNNNNN
NNNNNNNNNNNNNNNNNNNNNNNNNNNNNNNNNNNNNNNNNNNNNNNNNNNNNNNNNNNN
NNNNNNNNNNNNNNNNNNNNNNNNNNNNNNNNNNNNNNNNNNNNNNNNNNNNNNNNNNNN
NNNNNNNNNNNNNNNNNNNNNNNNNNNNNNNNNNNNNNNNNNNNNNNNNNNNNNNNNNNN
NNNNNNNNNNNNNNNNNNNNNNNNNNNNNNNNNNNNNNNNNNNNNNNNNNTAAGCGGAGG
AAAAGAAACTAACAAGGATTCCCCCAGTAACGGCGAGTGAAGAGGGAAAAGCCCAGCACC
GAATCCCACGGCCTGGCGTCGTCGGGAAATGTGGTGTATAGGAAGCCTACTTGTCGGCGC
GTGCGGGTACCCAAGTCCTCCTGATCGTGGCCTCTCCCATAGCGGGTGTCAGGCCCATAG
AGGCACCCGTCGTCGTCGGCTTGGAGCTTCCTCGGAGTCGGGTTGTTTGGGAATGCAGCC
CAAAGGGGTGGTAAACTCCATCTAAGGCTAAATACTGCCACGAGTCCGATAGCAAACAAG
TACCGTGAGGGAAAGTTGAAAAGAACTTTGAAGAGAGAGTTCAAGAGTACGTGAAACCGC
TTAGAGGCAAACGGGTGGAGCCGCAATGCGTCGACCCGGGGGATTCAACCAGTGCGTCGG
GACGCGCCGGGGGTGCGGAGCTGTAAAGCCCGTGCTTCGGCGTGGTCTCCGGGCGGACTG
GTGCACTTTCCTCGGGCCGATGGCCACGACCGGCTCTCCGCGGCCAAAAGCCAA--GCCG
GGAAGGTGACCCTGCGCCGCGGTGTTATAGCCCGGCTTG--CGTTGAGCTCGTCGGAGGG
CCGAGGTTGCCGTTCGTCGCCACCCTCGCCATCCTTGCTCGTCACGACTGGGGCGGACTG
CTCTGCCAGTGCTCTCCCGACCGCGAGCGTAGGAAGGGTCGGTACGGTGCGACGTGCTTC
GGGCCAGTGGCGAATCGGTCGGTCCTCCACCCGACC
>417_1_T_dolichorhynchus
GGACTTTGTATTTGTTGTTGGCTTTGTGATCTGGGTTAATTGGGTTGGCTTTAAGGTTGT
TAATTCGGGCTGAATTAGGGCAGCCAGGAAGTTTGTTAGGGGATGATCAGTTGTACAACG
TAATTGTGACTGCTCATGCATTTATAATAATTTTCTTTTTAGTGATGCCAATAATAATTG
GGGGGTTTGGAAATTGGTTAATTCCTTTAATGATTGGGGCTCCAGATATGGCTTTTCCTC
GTTTAAATAATTTGAGGTTTTGATTGTTGGTGCCTGCTTTGTTTTTATTACTGAGGTCCT
CTTTGGTTGAGAGAGGTGTGGGAACTGGTTGGACAGTCTACCCTCCGTTGTCTGGGAATG
TAGCTCACTCGGGAGCTTCTGTGGATTTGGCTATTTTTTCTTTACACCTTGCGGGTGCTT
CCTCTATTCTGGGTGCTATTAATTTTATTTCTACTGTTGGTAATATGCGATCTCCGGGTT
TGGTTGCTGAGCGAATTCCTTTATTTGTTTGAAGGGTTACTGTAACAGCTATTTTGTTGG
TTGCTGCTTTGCCTGTTTTAGCTGGAGCGATTACCATGCTTCTTACTGACCGTAATCTAA
ATACATCGTTTTTCGATCCTACTGGTGGAGGTGATCCTATTTTGTATATACACTTGTTTT
TCGTCTTTTGATGAACCATTATAAAAGATAATGCCTGCCCAGTGAATTTAAACGGCCGCG
TTAGCGTGAGCGTGCTAAGGTAGCGTAATAAATAGCCTTTTAATTGAAGGCCAGTGAATG
GCAAGACTAGGAATTTCTGTACTATAAAAAAAACTTTTCTTCTGGGTGAAAAGTCCCAGA
TCACAAGGAAGACGAAAAGACCCCGCGGAGCTTAACCTAAGAAAATTTAAAAAAAGTAAA
ATCTCACAAGTTTGATTGGGGCAATCATGGAACAGCAAAAACTTCCACTAACTAAAAGAC
CTATAAAAAGCTAAATAAGAACTAAAAAGTAGCTACCCCGGGGATAACAGCGTAATCCAA
TTTGAGAGTACACATCGAAAATTGGGTTTGCGACCTCGATGTTGGCTTAGGGATATCCAT
ATCAGTGCAACCGCTATAACCGGATAGTCTGTTCGACTATTATACCCTTATAAGCGGAGG
AAAAGAAACTAACAAGGATTCCCCCAGTAACGGCGAGTGAAGAGGGAAAAGCCCAGCACC
GAATCCCACGGCCTGGCGTCGTCGGGAAATGTGGTGTATAGGAAGCCTACTTGTCGGCGC
GTGCGGGTACCCAAGTCCTCCTGATCGTGGCCTCTCCCATAGCGGGTGTCAGGCCCATAG
AGGCACCCGTCGTCGTCGGCTTGGAGCTTCCTCGGAGTCGGGTTGTTTGGGAATGCAGCC
CAAAGGGGTGGTAAACTCCATCTAAGGCTAAATACTGCCACGAGTCCGATAGCAAACAAG
TACCGTGAGGGAAAGTTGAAAAGAACTTTGAAGAGAGAGTTCAAGAGTACGTGAAACCGC
TTAGAGGCAAACGGGTGGAGCCGCAATGCGTCGACCCGGGGGATTCAACCAGTGCGTCGG
GACGCGCCGGGGGTGCGGAGCTGTAAAGCCCGTGCTTCGGCGTGGTCTCCGGGCGGACTG
GTGCACTTTCCTCGGGCCGATGGCCACGACCGGCTCTCCGCGGCCAAAAGCCAA--GCCG
GGAAGGTGACCCTGCGCCGCGGTGTTATAGCCCGGCTTG--CGTTGAGCTCGTCGGAGGG
CCGAGGTTGCCGTTCGTCGCCACCCTCGCCATCCTTGCTCGTCACGACTGGGGCGGACTG
CTCTGCCAGTGCTCTCCCGACCGCGAGCGTAGGAAGGGTCGGTACGGTGCGACGTGCTTC
GGGCCAGTGGCGAATCGGTCGGTCCTCCACCCGACC
>109_1_L_savadiensis
GAACTTTGTACTTGTTGTTAGCATTGTGGTCTGGGTTAATTGGATTAGCTTTGAGGCTTT
TGATTCGAGCCGAGTTGGGACAACCAGGTAGTTTGTTGGGGGATGATCAGTTGTATAATG
TTATTGTAACAGCTCATGCGTTTATAATAATTTTTTTCTTGGTGATGCCAATGATGATTG
GTGGATTTGGGAATTGGTTGATTCCTTTAATGATTGGGGCTCCTGATATGGCTTTTCCTC
GGTTAAATAATTTAAGGTTTTGATTGCTTGTACCTGCCTTATTTCTATTGCTAAGGTCTT
CTTTGGTGGAGAGGGGTGTTGGGACTGGATGGACAGTTTATCCTCCTTTGTCAGGAAATG
TGGCTCATTCTGGGGCTTCTGTGGATTTAGCTATTTTTTCTTTGCATCTTGCTGGTGCTT
CTTCTATTTTGGGGGCTATTAATTTTATTTCTACTGTGGGAAATATGCGATCTCCAGGGA
TAGTTGCTGAGCGGATTCCGCTATTTGTTTGGAGTGTTACCGTAACGGCTGTTTTATTAG
TGGCTGCTTTGCCTGTATTAGCTGGTGCTATTACAATGCTACTAACTGATCGTAATTTAA
ATACATCTTTTTTTGACCCTACAGGGGGAGGTGATCCGATTTTATATATACATTTGTTTT
TCGTCTTCTGAAAATAATCTATAGAAGATAATGCCTGCCCAGTGAATTTAAACGGCCGCG
TTAGCGTGAGCGTGCTAAGGTAGCGTAATAAATAGCCTTTTAATTGAAGGCCAGTGAATG
GCAAGACTAGGAATTTCTATACCTTGAAAATAACTTTTCCTCTGGGTGAAAAGCCCCAGA
TAATAAGGAAGACGAAAAGACCCCGCGGAGCTTAACCTACAAGAT-TTT-AAAAAATAAA
TTCTCCTAAGTTTGATTGGGGCAATCATGGAATAATTAAAACTTCCAATCTATAAAAAAC
TCATTTAGAGCTTAATAAGAACTAAAAAGTAGCTACCCCGGGGATAACAGCGTAATCCAA
CTTGAGAGTACACATCGAAAGCTGGGTTTGCGACCTCGATGTTGGCTTAAGGATATCCAT
ATGAGTGCAACCGCTATAATTGGATAGTCTGTTCGACTATTATACCCTTATAAGCGGAGG
AAAAGAAACTAACAAGGATTCCCCCAGTAACGGCGAGTGAAGAGGGAAAAGCCCAGCACC
GAATCCCACGGCCTGGCGCCGTCGGGAAATGTGGTGTATAGGAAGCCTACTTGTCGGCGC
GCGCGGGTGCCCAAGTCCTCCTGATCGTGGCCTCTCCCACAGCGGGTGTCAGGCCCGTAG
AGGCCCCCGTCGTCGTCGGCTTGGAGCTTCCTCGGAGTCGGGTTGTTTGGGAATGCAGCC
CAAAGGGGTGGTAAACTCCATCTAAGGCTAAATACTGCCACGAGTCCGATAGCAAACAAG
TACCGTGAGGGAAAGTTGAAAAGAACTTTGAAGAGAGAGTTCAAGAGTACGTGAAACCGC
TTAGAGGCAAACGGGTGGAGCCGCAATGCGTCGACCCGGGGGATTCAACCAGTGCGTCGG
GACGCGCCGGGGACGCGGAGCTGTAAAGCCCGCGCTTCGGCGTGGTCTCCGGGCGGACTG
GTGCACTTTCCTCGGGCCGATGGCCACGACCGGCTCTCCGCGGCCAAAAGCCAA--GCCG
GGAAGGTGACCCGTCGCCGCGGTGTTATAGCCCGGCTTG--CGTTGAGCTCGTGGGAGGG
CCGAGGTTGCCGTTCGTCGCCACCCTCGCCATCCTTGCTCGTCACGACTGGGGCGGACTG
CTCTGCCAGTGCTCTCCCGACCGCGAGCGTAGGAAGGGTCGGTACGGTGCGACGTGCTTC
GGGCCAGTGGCGAATCGGTCGGTCCTCCNNNNNNNN
>257_1_L_savadiensis
GAACTTTGTACTTGTTGTTAGCATTGTGGTCTGGGTTAATTGGATTAGCTTTGAGGCTTT
TGATTCGAGCCGAGTTGGGACAACCAGGTAGTTTGTTGGGGGATGATCAGTTGTATAATG
TTATTGTAACAGCTCATGCGTTTATAATAATTTTTTTCTTGGTGATGCCAATGATGATTG
GTGGATTTGGGAATTGGTTGATTCCTTTAATGATTGGGGCTCCTGATATGGCTTTTCCTC
GATTAAATAATTTAAGGTTTTGATTGCTTGTACCTGCCTTATTTCTATTGCTAAGGTCTT
CTTTGGTGGAGAGGGGTGTTGGGACTGGATGGACAGTTTATCCTCCTTTGTCAGGAAATG
TGGCTCATTCTGGGGCTTCTGTGGACTTAGCTATTTTTTCTTTGCATCTTGCTGGTGCTT
CTTCTATTTTGGGGGCTATTAATTTTATTTCTACTGTGGGAAATATGCGATCTCCAGGGA
TAGTCGCTGAGCGGATTCCGCTATTTGTTTGGAGTGTTACCGTAACGGCTGTTTTATTAG
TGGCTGCTTTGCCTGTATTAGCTGGTGCTATTACAATGCTACTAACTGATCGTAATTTAA
ATACATCTTTTTTTGATCCTACAGGGGGAGGTGATCCAATTTTATACATACATTTGTTTT
TCGTCTTCTGAAAATAATCTATAGAAGATAATGCCTGCCCAGTGAATTTAAACGGCCGCG
TTAGCGTGAGCGTGCTAAGGTAGCGTAATAAATAGCCTTTTAATTGAAGGCCAGTGAATG
GCAAGACTAGGAATTTCTATACCTTGAAAATAACTTTTCCTCTGGGTGAAAAGCCCCAGA
TAATAAGGAAGACGAAAAGACCCCGCGGAGCTTAACCTACAAGAT-TTT-AAAAAATAAA
TTCTCCTAAGTTTGATTGGGGCAATCATGGAATAATTAAAACTTCCAATCTATAAAAAAC
TCATTTAGAGCTTAATAAGAACTAAAAAGTAGCTACCCCGGGGATAACAGCGTAATCCAA
CTTGAGAGTACACATCGAAAGCTGGGTTTGCGACCTCGATGTTGGCTTAAGGATATCCAT
ATGAGTGCAACCGCTATAATTGGATAGTCTGTTCGACTATTATACCCTTATAAGCGGAGG
AAAAGAAACTAACAAGGATTCCCCCAGTAACGGCGAGTGAAGAGGGAAAAGCCCAGCACC
GAATCCCACGGCCTGGCGCCGTCGGGAAATGTGGTGTATAGGAAGCCTACTTGTCGGCGC
GCGCGGGTGCCCAAGTCCTCCTGATCGTGGCCTCTCCCACAGCGGGTGTCAGGCCCGTAG
AGGCCCCCGTCGTCGTCGGCTTGGAGCTTCCTCGGAGTCGGGTTGTTTGGGAATGCAGCC
CAAAGGGGTGGTAAACTCCATCTAAGGCTAAATACTGCCACGAGTCCGATAGCAAACAAG
TACCGTGAGGGAAAGTTGAAAAGAACTTTGAAGAGAGAGTTCAAGAGTACGTGAAACCGC
TTAGAGGCAAACGGGTGGAGCCGCAATGCGTCGACCCGGGGGATTCAACCAGTGCGTCGG
GACGCGCCGGGGACGCGGAGCTGTAAAGCCCGCGCTTCGGCGTGGTCTCCGGGCGGACTG
GTGCACTTTCCTCGGGCCGATGGCCACGACCGGCTCTCCGCGGCCAAAAGCCAA--GCCG
GGAAGGTGACCCGYCGCCGCGGTGTTATAGCCCGGCTTG--CGTTGAGCTCGTGGGAGGG
CCGAGGTTGCCGTTCGTCGCCACCCTCGCCATCCTTGCTCGTCACGACTGGGGCGGACTG
CTCTGCCAGTGCTCTCCCGACCGCGAGCGTAGGAAGGGTCGGTACGGTGCGACGTGCTTC
GGGCCAGTGGCGAATCGGTCGGTCCTCCACCCGACC
>264_1_L_savadiensis
GAACTTTGTACTTGTTGTTAGCATTGTGGTCTGGGTTAATTGGATTAGCTTTGAGGCTTT
TGATTCGAGCCGAGTTGGGACAACCAGGTAGTTTGTTGGGGGATGATCAGTTGTATAATG
TTATTGTAACAGCTCATGCGTTTATAATAATTTTTTTCTTGGTGATGCCAATGATGATTG
GTGGATTTGGGAATTGGTTGATTCCTTTAATGATTGGGGCTCCTGATATGGCTTTTCCTC
GGTTAAATAATTTAAGGTTTTGATTGCTTGTACCTGCCTTATTTCTATTGCTAAGGTCTT
CTTTGGTGGAGAGGGGTGTTGGGACTGGATGGACAGTTTATCCTCCTTTGTCAGGAAATG
TGGCTCATTCTGGGGCTTCTGTGGATTTAGCTATTTTTTCTTTGCATCTTGCTGGTGCTT
CTTCTATTTTGGGGGCCATTAATTTTATTTCTACTGTGGGAAATATGCGATCTCCAGGGA
TAGTCGCTGAGCGGATTCCGCTATTTGTTTGGAGTGTTACTGTAACGGCTGTTTTATTAG
TGGCTGCTTTGCCTGTATTAGCTGGTGCTATTACAATGCTACTAACTGATCGTAATTTAA
ATACATCTTTTTTTGACCCTACAGGGGGAGGTGATCCAATTTTATATATACATTTGTTTT
TCGTCTTCTGAAAATAATCTATAGAAGATAATGCCTGCCCAGTGAATTTAAACGGCCGCG
TTAGCGTGAGCGTGCTAAGGTAGCGTAATAAATAGCCTTTTAATTGAAGGCCAGTGAATG
GCAAGACTAGGAATTTCTATACCTTGAAAATAACTTTTCCTCTGGGTGAAAAGCCCCAGA
TAATAAGGAAGACGAAAAGACCCCGCGGAGCTTAACCTACAAGAT-TTT-AAAAAATAAA
TTCTCCTAAGTTTGATTGGGGCAATCATGGAATAATTAAAACTTCCAATCTATAAAAAAT
TCATTTAGAGCTTAATAAGAACTAAAAAGTAGCTACCCCGGGGATAACAGCGTAATCCAA
CTTGAGAGTACACATCGAAAGCTGGGTTTGCGACCTCGATGTTGGCTTAAGGATATCCAT
ATGAGTGCAACCGCTATAATTGGATAGTCTGTTCGACTATTATACCCTTATAAGCGGAGG
AAAAGAAACTAACAAGGATTCCCCCAGTAACGGCGAGTGAAGAGGGAAAAGCCCAGCACC
GAATCCCACGGCCTGGCGCCGTCGGGAAATGTGGTGTATAGGAAGCCTACTTGTCGGCGC
GCGCGGGTGCCCAAGTCCTCCTGATCGTGGCCTCTCCCACAGCGGGTGTCAGGCCCGTAG
AGGCCCCCGTCGTCGTCGGCTTGGAGCTTCCTCGGAGTCGGGTTGTTTGGGAATGCAGCC
CAAAGGGGTGGTAAACTCCATCTAAGGCTAAATACTGCCACGAGTCCGATAGCAAACAAG
TACCGTGAGGGAAAGTTGAAAAGAACTTTGAAGAGAGAGTTCAAGAGTACGTGAAACCGC
TTAGAGGCAAACGGGTGGAGCCGCAATGCGTCGACCCGGGGGATTCAACCAGTGCGTCGG
GACGCGCCGGGGACGCGGAGCTGTAAAGCCCGCGCTTCGGCGTGGTCTCCGGGCGGACTG
GTGCACTTTCCTCGGGCCGATGGCCACGACCGGCTCTCCGCGGCCAAAAGCCAA--GCCG
GGAAGGTGACCCGCCGCCGCGGTGTTATAGCCCGGCTTG--CGTTGAGCTCGTGGGAGGG
CCGAGGTTGCCGTTCGTCGCCACCCTCGCCATCCTTGCTCGTCACGACTGGGGCGGACTG
CTCTGCCAGTGCTCTCCCGACCGCGAGCGTAGGAAGGGTCGGTACGGTGCGACGTGCTTC
GGGCCAGTGGCGAATCGGTCGGTCCTCCACCCGACC
>242_3_L_generosus
GAACTTTGTATTTATTGCTAGCGTTGTGGTCTGGATTGATTGGATTAGCTCTGAGACTTT
TGATTCGAGCTGAGTTAGGGCAGCCAGGTAGTTTGTTAGGGGACGATCAGTTATATAATG
TTATTGTAACAGCTCATGCGTTTATAATAATTTTTTTCTTGGTGATGCCAATGATGATTG
GTGGGTTTGGAAACTGGTTGATTCCTTTGATGATTGGGGCTCCTGATATAGCTTTTCCTC
GATTAAATAATTTAAGATTTTGGTTGCTTGTACCTGCTTTATTTTTGTTGTTGAGATCTT
CTTTGGTGGAGAGGGGTGTTGGGACTGGTTGAACGGTTTATCCACCTTTGTCAGGAAATG
TAGCTCATTCTGGGGCTTCCGTTGATTTAGCTATTTTTTCTTTGCATCTTGCCGGTGCTT
CTTCCATTTTGGGGGCTATTAATTTTATTTCTACTGTGGGAAATATGCGGTCTCCGGGCA
TAGTTGCTGAGCGAATTCCGTTATTTGTTTGGAGTGTTACTGTAACGGCTATTTTATTAG
TAGCTGCTTTGCCTGTGTTAGCTGGTGCTATTACTATGCTACTAACTGACCGTAATTTAA
ATACATCTTTCTTTGATCCTACTGGGGGAGGTGATCCAATTCTATATATACACTTGTTTT
TCGTCTTCTGAAGATAACTTATAGAAGATAATGCCTGCCCAGTGAATTTAAACGGCCGCG
TTAGCGTGAGCGTGCTAAGGTAGCGTAATAAATAGCCTTTTAATTGAAGGCCAGTGAATG
GCAAGACTAGGAATTTCTATACCCTGAAAATAACTTTTCTTCTGGGTGAAAAGCCCCAGA
TAATAAGGAAGACGAAAAGACCCCGCGGAGCTTAACCTACAAGACTTTTCAAAAAATAAA
TTCTCCTAAGTTTGATTGGGGCAATCATGGAATAACTAAAACTTCCAATCTATAAAAAAC
TCATTCAGAGCTTGATAAGAACTAAAAAGTAGCTACCCCGGGGATAACAGCGTAATCCAA
CTTGAGAGTACACATCGAAAGCTGGGTTTGCGACCTCGATGTTGGCTTAAGGATATCCAT
ATAAGTGCAACCGCTATAACTGGATAGTCTGTTCGACTATTATACCCTTATAAGCGGAGG
AAAAGAAACTAACAAGGATTCCCCCAGTAACGGCGAGTGAAGAGGGAAAAGCCCAGCACC
GAATCCCACGGCCTGGCGCCGTCGGGAAATGTGGTGTATAGGAAGCCTACTTGTCGGCGC
GCGCGGGTGCCCAAGTCCTCCTGATCGTGGCCTCTCCCACAGCGGGTGTCAGGCCCGTAG
AGGCCCCCGTCGTCGTCGGCTTGGAGCTTCCTCGGAGTCGGGTTGTTTGGGAATGCAGCC
CAAAGGGGTGGTAAACTCCATCTAAGGCTAAATACTGCCACGAGTCCGATAGCAAACAAG
TACCGTGAGGGAAAGTTGAAAAGAACTTTGAAGAGAGAGTTCAAGAGTACGTGAAACCGC
TTAGAGGCAAACGGGTGGAGCCGCAATGCGTCGACCCGGGGGATTCAACCAGTGCGTCGG
GACGCGCCGGGGACGCGGAGCTGTAAAGCCCGCGCTTCGGCGTGGTCTCCGGGCGGACTG
GTGCACTTTCCTCGGGCCGATGGCCACGACCGGCTCTCCGCGGCCAAAAGCCAA--GCCG
GGAAGGTGACCCGTCGCCGCGGTGTTATAGCCCGGCTTG--CGTTGAGCTCGTGGGAGGG
CCGAGGTTGCCGTTCGTCGCCACCCTCGCCATCCTTGCTCGTCACGACTGGGGCGGACTG
CTCTGCCAGTGCTCTCCCGACCGCGAGCGTAGGAAGGGTCGGTACGGTGCGACGTGCTTC
GGGCCAGTGGCGAATCGGTCGGTCCTCCACCCGACC
>244_3_L_generosus
GAACTTTGTATTTATTGCTAGCGTTGTGGTCTGGATTGATTGGATTAGCTCTGAGACTTT
TGATTCGAGCTGAGTTAGGGCAGCCAGGTAGTTTGTTAGGGGACGATCAGTTGTATAATG
TTATTGTAACAGCTCATGCGTTTATAATAATTTTTTTCTTGGTGATGCCAATGATGATTG
GTGGGTTTGGAAACTGGTTGATTCCTTTGATGATTGGGGCTCCTGATATAGCTTTTCCTC
GATTAAATAACTTAAGGTTTTGATTGCTTGTACCTGCTTTATTTTTGTTGTTGAGATCTT
CTTTGGTGGAGAGGGGTGTTGGGACTGGTTGAACGGTTTATCCACCTTTGTCAGGAAATG
TAGCTCATTCTGGGGCTTCCGTTGATTTAGCTATTTTTTCTTTGCATCTTGCCGGTGCTT
CTTCCATTTTGGGGGCTATTAATTTTATTTCTACTGTGGGAAATATGCGGTCTCCGGGCA
TAGTTGCTGAGCGAATTCCGTTATTTGTTTGGAGTGTTACTGTAACGGCTATTTTATTAG
TAGCTGCTTTGCCTGTGTTAGCTGGTGCTATTACTATGCTACTAACTGATCGTAATTTAA
ATACATCTTTCTTTGATCCTACTGGGGGAGGTGATCCAATTCTGTATATACATTTGTTTT
TCGTCTTCTGAAGATAACTTATAGAAGATAATGCCTGCCCAGTGAATTTAAACGGCCGCG
TTAGCGTGAGCGTGCTAAGGTAGCGTAATAAATAGCCTTTTAATTGAAGGCCAGTGAATG
GCAAGACTAGGAATTTCTATACCCTGAAAATAACTTTTCTTCTGGGTGAAAAGCCCCAGA
TAATAAGGAAGACGAAAAGACCCCGCGGAGCTTAACCTACAAGACTTTTCAAAAAATAAA
TTCTCCTAAGTTTGATTGGGGCAATCATGGAATAACTAAAACTTCCAA-CCTATAAAAAC
TCATTCAGAGCTTAATAAGAACTAAAAAGTAGCTACCCCGGGGATAACAGCGTAATCCAA
CTTGAGAGTACACATCGAAAGCTGGGTTTGCGACCTCGATGTTGGCTTAAGGATATCCAT
ATAAGTGCAACCGCTATAACTGGATAGTCTGTTCGACTATTATACCCTTATAAGCGGAGG
AAAAGAAACTAACAAGGATTCCCCCAGTAACGGCGAGTGAAGAGGGAAAAGCCCAGCACC
GAATCCCACGGCCTGGCGCCGTCGGGAAATGTGGTGTATAGGAAGCCTACTTGTCGGCGC
GCGCGGGTGCCCAAGTCCTCCTGATCGTGGCCTCTCCCAYAGCGGGTGTCAGGCCCGTAG
AGGCCCCCGTCGTCGTCGGCTTGGAGCTTCCTCGGAGTCGGGTTGTTTGGGAATGCAGCC
CAAAGGGGTGGTAAACTCCATCTAAGGCTAAATACTGCCACGAGTCCGATAGCAAACAAG
TACCGTGAGGGAAAGTTGAAAAGAACTTTGAAGAGAGAGTTCAAGAGTACGTGAAACCGC
TTAGAGGCAAACGGGTGGAGCCGCAATGCGTCGACCCGGGGGATTCAACCAGTGCGTCGG
GACGCGCCGGGGACGCGGAGCTGTAAAGCCCGCGCTTCGGCGTGGTCTCCGGGCGGACTG
GTGCACTTTCCTCGGGCCGATGGCCACGACCGGCTCTCCGCGGCCAAAAGCCAA--GCCG
GGAAGGTGACCCGTCGCCGCGGTGTTATAGCCCGGCTTG--CGTTGWGCTCGTGGGAGGG
CCGAGGTTGCCGTTCGTCGCCACCCTCGCCATCCTTGCTCGTCACGACTGGGGCGGACTG
CTCTGYCAGTGCTCTCCCGACCGCGAGCGTAGGAAGGGTCGGTACGGTGCGACGTGCTTC
GGGCCAGTGGCGAATCGGTCGGTCCTCCACCCGACC
>636_3_L_generosus
GAACTTTGTATTTATTGCTAGCGTTGTGGTCTGGATTGATTGGATTAGCTCTGAGACTTT
TGATTCGAGCTGAGTTAGGGCAGCCAGGTAGTTTGTTAGGGGACGATCAGTTGTATAATG
TTATTGTAACAGCTCATGCGTTTATAATAATTTTTTTCTTGGTGATGCCAATGATGATTG
GTGGGTTTGGGAACTGGTTGATTCCTTTGATGATTGGGGCTCCTGATATAGCTTTTCCTC
GATTAAATAATTTAAGGTTTTGATTGCTTGTACCTGCTTTATTTTTGTTGTTGAGATCTT
CTTTGGTGGAGAGGGGTGTTGGGACTGGTTGAACGGTTTATCCACCTTTGTCAGGGAATG
TAGCTCATTCCGGGGCTTCCGTTGATTTAGCCATTTTTTCTTTGCATCTTGCCGGTGCTT
CTTCCATTTTGGGGGCTATTAATTTTATTTCTACTGTGGGAAATATGCGGTCTCCGGGCA
TGGTTGCTGAGCGAATTCCGTTATTTGTTTGGAGTGTTACTGTAACGGCTATTTTATTAG
TAGCTGCTTTGCCTGTGTTAGCTGGTGCTATTACTATGCTACTAACTGACCGTAACTTAA
ATACATCTTTCTTTGATCCTACTGGGGGAGGTGATCCAATTCTATATATACACTTGTTTT
TCGTCTTCTGAAGATAACTTATAGAAGATAATGCCTGCCCAGTGAATTTAAACGGCCGCG
TTAGCGTGAGCGTGCTAAGGTAGCGTAATAAATAGCCTTTTAATTGAAGGCCAGTGAATG
GCAAGACTAGGAATTTCTATACCCTGAAAATAACTTTTCTTCTGGGTGAAAAGCCCCAGA
TAATAAGGAAGACGAAAAGACCCCGCGGAGCTTAACCTACAAGACTTTTCAAAAAATAAA
TTCTCCTAAGTTTGATTGGGGCAATCATGGAATAATTAAAACTTCCAATCTATAAAAAAC
TCATTCAGAGCTTAATAAGAACTAAAAAGTAGCTACCCCGGGGATAACAGCGTAATCCAA
CTTGAGAGTACACATCGAAAGCTGGGTTTGCGACCTCGATGTTGGCTTAAGGATATCCAT
ATAAGTGCAACCGCTATAACTGGATAGTCTGTTCGACTATTATACCCTTATAAGCGGAGG
AAAAGAAACTAACAAGGATTCCCCCAGTAACGGCGAGTGAAGAGGGAAAAGCCCAGCACC
GAATCCCACGGCCTGGCGCCGTCGGGAAATGTGGTGTATAGGAAGCCTACTTGTCGGCGC
GCGCGGGTGCCCAAGTCCTCCTGATCGTGGCCTCTCCCACAGCGGGTGTCAGGCCCGTAG
AGGCCCCCGTCGTCGTCGGCTTGGAGCTTCCTCGGAGTCGGGTTGTTTGGGAATGCAGCC
CAAAGGGGTGGTAAACTCCATCTAAGGCTAAATACCGCCACGAGTCCGATAGCAAACAAG
TACCGTGAGGGAAAGTTGAAAAGAACTTTGAAGAGAGAGTTCAAGAGTACGTGAAACCGC
TTAGAGGCAAACGGGTGGAGCCGCAATGCGTCGACCCGGGGGATTCAACCAGTGCGTCGG
GACGCGCCGGGGACGCGGAGCTGTAAAGCCCGCGCTTCGGCGTGGTCTCCGGGCGGACTG
GTGCACTTTCCTCGGGCCGATGGCCACGACCGGCTCTCCGCGGCCAAAAGCCAA--GCCG
GGAAGGTGACCCGTCGCCGCGGTGTTATAGCCCGGCTTG--CGTTGAGCTCGTGGGAGGG
CCGAGGTTGCCGTTCGTCGCCACCCTCGCCATCCTTGCTCGTCACGACTGGGGCGGACTG
CTCTGCCAGTGCTCTCCCGACCGCGAGCGTAGGAAGGGTCGGTACGGTGCGACGTGCTTC
GGGCCAGTGGCGAATCGGTCGGTCCTCCACCCGACC
>113_8_L_ferrugineus
GAACCTTGTATTTATTATTAGCATTGTGGTCTGGGTTGATTGGGTTAGCTTTGAGGCTTT
TGATTCGAGCTGAGTTAGGACAACCAGGTAGTTTGCTAGGGGATGATCAGTTATATAATG
TCATTGTAACAGCTCATGCATTTATGATAATTTTTTTCTTGGTGATGCCAATGATAATTG
GTGGGTTTGGAAATTGGTTGATTCCTTTGATGATTGGGGCTCCTGATATAGCTTTTCCTC
GATTGAATAATTTAAGGTTTTGATTGCTTGTACCTGCTTTGTTTTTGTTGTTGAGATCTT
CTCTGGTGGAGAGGGGCGTTGGAACTGGTTGAACGGTTTATCCACCCTTGTCAGGAAATG
TGGCCCATTCTGGGGCTTCTGTTGATTTAGCTATTTTCTCTTTGCACCTTGCTGGTGCTT
CTTCTATTCTGGGGGCTATTAATTTTATCTCTACTGTGGGAAATATGCGGTCTCCGGGGA
TAGTTGCTGAGCGAATTCCATTATTTGTTTGGAGTGTTACTGTAACGGCTATTTTATTGG
TAGCTGCTTTGCCTGTGTTAGCTGGTGCTATTACTATGTTATTAACTGATCGTAATTTAA
ACACATCTTTCTTTGATCCTACTGGGGGAGGTGATCCAATTCTGTACATGCACTTGTTTT
TCGTCTTCTGAGAGTAATCTATAGAAGATAATGCCTGCCCAGTGAATTTAAACGGCCGCG
TTAGCGTGAGCGTGCTAAGGTAGCGTAATAAATAGCCTTTTAATTGAAGGCCAGTGAATG
GCAAGACTAGGAATTTCTATACCCTGAAAACAACTTTTCCTCTGGGTGAAAAGCCCCAGA
TAGAAAGGAAGACGAAAAGACCCCGCGGAGCTTGACCTACAAGACTTTTTAAAAAATAAA
TTCTCCCAAGTTTGATTGGGGCAATCATGGAATAACTAAAACTTCCAA-CTAATAAAAAC
TCATTCAGAGCTCGATAAGAACTAAAAAGTAGCTACCCCGGGGATAACAGCGTAATCCAG
CTTGAGAGTACACATCGAAAGCTGGGTTTGCGACCTCGATGTTGGCTTAAGGATATCCAT
ATAAGTGCAACCGCTATAACTGGATAGTCTGTTCGACTATTATACCCTTATAAGCGGAGG
AAAAGAAACTAACAAGGATTCCCCCAGTAACGGCGAGTGAAGAGGGAAAAGCCCAGCACC
GAATCCCACGGCCTGGCGCCGTCGGGAAATGTGGTGTATAGGAAGCCTACTTGTCGGCGC
GCGCGGGTGCCCAAGTCCTCCTGATCGTGGCCTCTCCCATAGCGGGTGTCAGGCCCGTAG
AGGCCCCCGTCGTCGTCGGCTTGGAGCTTCCTCGGAGTCGGGTTGTTTGGGAATGCAGCC
CAAAGGGGTGGTAAACTCCATCTAAGGCTAAATACCGCCACGAGTCCGATAGCAAACAAG
TACCGTGAGGGAAAGTTGAAAAGAACTTTGAAGAGAGAGTTCAAGAGTACGTGAAACCGC
TCAGAGGCAAACGGGTGGAGCCGCAATGCGTCGACCCGGGGGATTCAACCAGTGCGTCGG
GACGCGCCGGGGACGCGGAGCTGTAAAGCCCGCGCTTCGGCGTGGTCTCCGGGCGGACTG
GTGCACTTTCCTCGGGCCGATGGCCACGACCGGCTCTCCGCGGCCAAAAGCCAA--GCCG
GGAAGGTGACCCGTCGCCGCGGTGTTATAGCCCGGCTTG--CGTTGAGCTCGTGGGAGGG
CCGAGGTTGCCGTTCGTCGCCACCCTCGCCATCCTTGCTCGTCACGACTGGGGCGGACTG
CTCCGTCAGTGCTCTCCCGACCGCGAGCGTAGGAAGGGTCGGTACGGTGCGACGTGCTTC
GGGCCAGTGGCGAATCGGTCGGTCCTCCNNNNNNNN
>113_12_L_ferrugineus
GAACCTTGTATTTATTATTAGCATTGTGGTCTGGGTTGATTGGGTTAGCTTTGAGGCTTT
TGATTCGAGCTGAGTTAGGACAACCAGGTAGTTTGCTAGGGGATGATCAGTTATATAATG
TCATTGTAACAGCTCATGCATTTATGATAATTTTTTTCTTGGTGATGCCTATGATAATTG
GTGGGTTTGGAAATTGGTTGATTCCTTTGATGATTGGGGCTCCTGATATAGCTTTTCCTC
GATTGAATAATTTAAGGTTTTGATTGCTTGTACCTGCTTTGTTTTTGTTGTTGAGATCTT
CTCTGGTGGAGAGGGGCGTTGGAACTGGTTGAACGGTTTATCCACCCTTGTCAGGAAATG
TGGCCCATTCTGGGGCTTCTGTTGATTTAGCTATTTTCTCTTTGCACCTTGCTGGTGCTT
CTTCTATTCTGGGGGCTATTAATTTTATCTCTACTGTGGGAAATATGCGGTCTCCGGGGA
TAGTTGCTGAGCGAATTCCATTATTTGTTTGGAGTGTTACTGTAACGGCTATTTTATTGG
TAGCTGCTTTGCCTGTGTTAGCTGGTGCTATTACTATGTTATTAACTGATCGTAATTTAA
ACACATCTTTCTTTGATCCTACTGGGGGAGGTGATCCAATTCTGTACATGCACTTGTTTT
TCGTCTTCTGAGAATAATCTATAGAAGATAATGCCTGCCCAGTGAATTTAAACGGCCGCG
TTAGCGTGAGCGTGCTAAGGTAGCGTAATAAATAGCCTTTTAATTGAAGGCCAGTGAATG
GCAAGACTAGGAATTTCTATACCCTGAAAACAACTTTTCCTCTGGGTGAAAAGCCCCAGA
TAGTAAGGAAGACGAAAAGACCCCGCGGAGCTTGACCTACAAGACTTTTTAAAAAATAAA
TTCTCCCAAGTTTGATTGGGGCAATCATGGAATAACTAAAACTTCCAA-CTAATAAAAAC
TCATTCAGAGCTCGATAAGAACTAAAAAGTAGCTACCCCGGGGATAACAGCGTAATCCAG
CTTGAGAGTACACATCGAAAGCTGGGTTTGCGACCTCGATGTTGGCTTAAGGATATCCAT
ATAAGTGCAACCGCTATAACTGGATAGTCTGTTCGACTATTATACCCTTATAAGCGGAGG
AAAAGAAACTAACAAGGATTCCCCCAGTAACGGCGAGTGAAGAGGGAAAAGCCCAGCACC
GAATCCCACGGCCTGGCGCCGTCGGGAAATGTG-------GGAAGCCTACTTGTCGGCGC
GCGCGGGTGCCCAAGTCCTCCTGATCGTGGCCTCTCCCATAGCGGGTGTCAGGCCCGTAG
AGGCCCCCGTCGTCGTCGGCTTGGAGCTTCCTCGGAGTCGGGTTGTTTGGGAATGCAGCC
CAAAGGGGTGGTAAACTCCATCTAAGGCTAAATACCGCCACGAGTCCGATAGCAAACAAG
TACCGTGAGGGAAAGTTGAAAAGAACTTTGAAGAGAGAGTTCAAGAGTACGTGAAACCGC
TCAGAGGCAAACGGGTGGAGCCGCAATGCGTCGACCCGGGGGATTCAACCAGTGCGTCGG
GACGCGCCGGGGACGCGGAGCTGTAAAGCCCGCGCTTCGGCGTGGTCTCCGGGCGGACTG
GTGCACTTTCCTCGGGCCGATGGCCACGACCGGCTCTCCGCGGCCAAAAGCCAA--GCCG
GGAAGGTGACCCGTCGCCGCGGTGTTATAGCCCGGCTTG--CGTTGAGCTCGTGGGAGGG
CCGAGGTTGCCGTTCGTCGCCACCCTCGCCATCCTTGCTCGTCACGACTGGGGCGGACTG
CTCCGTCAGTGCTCTCCCGACCGCGAGCGTAGGAAGGGTCGGTACGGTGCGACGTGCTTC
GGGCCAGTGGCGAATCGGTCGGTCCTCCNNNNNNNN
>113_14_L_ferrugineus
GGACCTTGTATTTATTATTAGCGTTGTGGTCTGGGTTGATTGGGTTAGCTTTGAGGCTTT
TGATTCGAGCTGAGTTAGGACAACCAGGTAGTTTGCTAGGGGATGATCAGTTATATAATG
TTATTGTAACAGCTCATGCATTTATGATAATTTTTTTCTTGGTGATGCCAATGATAATTG
GTGGGTTTGGAAATTGGCTGATTCCTTTGATGATTGGGGCTCCTGATATAGCTTTTCCTC
GATTGAATAATTTAAGGTTTTGATTGCTTGTACCTGCTTTGTTTTTGTTGTTGAGGTCTT
CTCTGGTGGAGAGGGGCGTTGGAACTGGTTGAACGGTTTATCCACCATTGTCAGGAAATG
TGGCCCATTCTGGGGCTTCTGTTGATTTAGCTATTTTCTCTTTGCATCTTGCTGGTGCTT
CTTCTATTCTGGGGGCTATTAATTTTATCTCTACTGTGGGAAATATGCGGTCTCCGGGGA
TAGTTGCTGAGCGAATTCCATTATTTGTTTGGAGTGTTACTGTAACGGCTATTTTATTGG
TAGCTGCTTTGCCTGTGTTAGCTGGTGCTATTACCATGTTATTAACTGATCGTAATTTAA
ACACATCTTTCTTTGATCCTACTGGGGGAGGTGATCCAATTCTGTACATGCACTTGTTTT
TCGTCTTCTGAAAATAATCTATAGAAGATAATGCCTGCCCAGTGAATTTAAACGGCCGCG
TTAGCGTGAGCGTGCTAAGGTAGCGTAATAAATAGCCTTTTAATTGAAGGCCAGTGAATG
GCAAGACTAGGAATTTCTATACCCTGAAAACAACTTTTCCTCTGGGTGAAAAGCCCCAGA
TAGTAAGGAAGACGAAAAGACCCCGCGGAGCTTGACCTACAAGACTTTTTAAAAAATAAA
TTCTCCCAAGTTTGATTGGGGCAATCATGGAATAACTAAAACTTCCAA-CTAATAAAAAC
TCATTCAGAGCTCGATAAGAACTAAAAAGTAGCTACCCCGGGGATAACAGCGTAATCCAG
CTTGAGAGTACACATCGAAAGCTGGGTTTGCGACCTCGATGTTGGCTTAAGGATATCCAT
ATAAGTGCAACCGCTATAACTGGATAGTCTGTTCGACTATTATACCCTTATAAGCGGAGG
AAAAGAAACTAACAAGGATTCCCCCAGTAACGGCGAGTGAAGAGGGAAAAGCCCAGCACC
GAATCCCACGGCCTGGCGCCGTCGGGAAATGTGGTGTATAGGAAGCCTACTTGTCGGCGC
GCGCGGGTGCCCAAGTCCTCCTGATCGTGGCCTCTCCCATAGCGGGTGTCAGGCCCGTAG
AGGCCCCCGTCGTCGTCGGCTTGGAGCTTCCTCGGAGTCGGGTTGTTTGGGAATGCAGCC
CAAAGGGGTGGTAAACTCCATCTAAGGCTAAATACCGCCACGAGTCCGATAGCAAACAAG
TACCGTGAGGGAAAGTTGAAAAGAACTTTGAAGAGAGAGTTCAAGAGTACGTGAAACCGC
TCAGAGGCAAACGGGTGGAGCCGCAATGCGTCGACCCGGGGGATTCAACCAGTGCGTCGG
GACGCGCCGGGGACGCGGAGCTGTAAAGCCCGCGCTTCGGCGTGGTCTCCGGGCGGACTG
GTGCACTTTCCTCGGGCCGATGGCCACGACCGGCTCTCCGCGGCCAAAAGCCAA--GCCG
GGAAGGTGACCCGTCGCCGCGGTGTTATAGCCCGGCTTG--CGTTGAGCTCGTGGGAGGG
CCGAGGTTGCCGTTCGTCGCCACCCTCGCCATCCTTGCTCGTCACGACTGGGGCGGACTG
CTCCGTCAGTGCTCTCCCGACCGCGAGCGTAGGAAGGGTCGGTACGGTGCGACGTGCTTC
GGGCCAGTGGCGAATCGGTCGGTCCTCCNNNNNNNN
>153_L_marginalis
GAACTTTATATTTATTGCTAGCATTGTGGTCTGGATTGATTGGGTTAGCTCTGAGACTTT
TGATTCGAGCTGAGTTAGGGCAGCCAGGTAGTTTGTTAGGGGACGATCAGTTATATAATG
TTATTGTAACGGCTCATGCGTTTATAATAATTTTTTTCTTGGTGATGCCAATGATGATTG
GTGGGTTTGGAAATTGGCTGATTCCTTTGATGATTGGGGCTCCTGATATGGCTTTTCCTC
GATTAAATAATTTAAGGTTTTGATTGCTTGTACCTGCTTTATTTTTGTTGTTGAGATCTT
CTTTGGTGGAGAGGGGTGTTGGGACTGGTTGAACGGTTTATCCACCTTTGTCAGGAAATG
TAGCTCATTCTGGGGCTTCTGTTGATTTAGCTATTTTTTCTTTGCATCTTGCCGGTGCTT
CTTCCATTTTGGGGGCTATTAATTTTATTTCTACTGTGGGAAATATGCGATCTCCGGGTA
TAGTTGCTGAGCGAATTCCGTTATTTGTTTGGAGTGTTACTGTAACGGCTATTTTATTAG
TAGCTGCTTTGCCTGTGTTAGCTGGTGCTATTACTATGCTACTAACTGATCGTAATCTAA
ATACATCTTTTTTTGACCCTACTGGGGGAGGTGATCCAATTCTATATATACACTTGTTTT
TCGTCTTCTGAAAATAATTTATAGAAGATAATGCCTGCCCAGTGAATTTAAACGGCCGCG
TTAGCGTGAGCGTGCTAAGGTAGCGTAATAAATAGCCTTTTAATTGAAGGCCAGTGAATG
GCAAGACTAGGAATTTCTATACCCTGAAAACAACTTTTCTTCTGGGTGAAAAGCCCCAGA
TAATAAGGAAGACGAAAAGACCCCGCGGAGCTTAACCTACAAGACTTTTCAAAAAATAAA
TTCTCCTAAGTTTGATTGGGGCAATCATGGAATAACTAAAACTTCCAATTTTTTAAAAAC
TCATTCAGAGCTTAATAAGAACTAAAAAGTAGCTACCCCGGGGATAACAGCGTAATCCAG
CTTGAGAGTACACATCGAAAGCTGGGTTTGCGACCTCGATGTTGGCTTAAGGATATCCAT
ATGAGTGCAACCGCTATAACTGGATAGTCTGTTCGACTATTATACCCTTATAAGCGGAGG
AAAAGAAACTAACAAGGATTCCCCCAGTAACGGCGAGTGAAGAGGGAAAAGCCCAGCACC
GAATCCCACGGCCTGGCGCCGTCGGGAAATGTGGTGTATAGGAAGCCTACTTGTCGGCGC
GCGCGGGTGCCCAAGTCCTCCTGATCGTGGCCTCTCCCATAGCGGGTGTCAGGCCCGTAG
AGGCCCCCGTCGTCGTCGGCTTGGAGCTTCCTCGGAGTCGGGTTGTTTGGGAATGCAGCC
CAAAGGGGTGGTAAACTCCATCTAAGGCTAAATACTGCCACGAGTCCGATAGCAAACAAG
TACCGTGAGGGAAAGTTGAAAAGAACTTTGAAGAGAGAGTTCAAGAGTACGTGAAACCGC
TTAGAGGCAAACGGGTGGAGCCGCAATGCGTCGACCCGGGGGATTCAACCAGTGCGTCGG
GACGCGCCGGGGACGCGGAGCTGTAAAGCCCGCGCTTCGGCGTGGTCTCCGGGCGGACTG
GTGCACTTTCCTCGGGCCGATGGCCACGACCGGCTCTCCGCGGCCAAAAGCCAA--GCCG
GGAAGGTGACCCGTCGCCGCGGTGTTATAGCCCGGCTTG--CGTTGAGCTCGTGGGAGGG
CCGAGGTTGCCGTTCGTCGCCACCCTCGCCATCCTTGCTCGTCACGACTGGGGCGGACTG
CTCTGTCAGTGCTCTCCCGACCGCGAGCGTAGGAAGGGTCGGTACGGTGCGACGTGCTTC
GGGCCAGTGGCGAATCGGTCGGTCCTCCNNNNNNNN
>652_1_P_rakhinensis
GAACTTTGTATTTGCTGTTAGCCTTGTGGTCTGGGTTAATTGGGTTAGCTTTAAGGCTTT
TGATTCGAGCTGAGTTAGGTCAGCCTGGGAGGTTATTAGGGGATGATCAGCTTTATAATG
TAATTGTGACGGCTCATGCTTTTATGATAATTTTCTTTTTAGTTATGCCAATGATGATTG
GGGGATTTGGTAATTGGTTAATTCCTTTAATGATTGGGGCTCCTGATATGGCTTTCCCTC
GATTAAATAATTTGAGATTTTGGTTGCTTGTGCCAGCTTTATTCTTGTTGCTGAGGTCTT
CTTTGGTGGAAAGGGGTGTTGGGACTGGATGGACGGTTTATCCCCCTTTGTCTGGGAATG
TGGCTCATTCGGGAGCTTCTGTTGATTTGGCAATTTTTTCTTTACACCTTGCCGGTGCTT
CTTCCATTCTGGGGGCTATTAACTTTATTTCAACTGTCGGTAATATGCGGTCTCCGGGCT
TGGTGGCTGAGCGTATTCCTTTATTTGTGTGAAGGGTAACTGTGACTGCTGTGTTGTTAG
TGGCCGCTTTGCCTGTACTAGCCGGTGCTATTACTATATTACTTACTGATCGTAATTTAA
ATACATCATTTTTTGACCCTACGGGGGGAGGTGATCCTATTTTATATATGCATTTGTTTT
TCGTCTTTTGTCTAGACAAAATAAAAGATAATGCCTGCCCAGTGAGCTTAAACGGCCGCG
TTAGCGTGAGCGTGCTAAGGTAGCGTAATAAATAGCCTTCTAATTAGAGGCCAGTGAATG
GCAAGACTAGGAATATCTGTACCAGAAAAAAAACTTTTCTTTTGAGTGAAAAGACTCAAA
TACTAAGGAAGACGAAAAGACCCCGCGGAGCTTAACTTAATCAATTTTTAAATTATAAAC
TTCT-TAAAGTTTGATTGGGGCAATCTTGGAACCACACTAACTTCCAATTTTAATAATAA
TTATATAAAACTTAATAAGGACCAAAAAGCAGCTACCCCGGGGATAACAGCGTTATCTAA
CTCAAGAGTACATATCGAAAGTTAGGTTTGCGACCTCGATGTTGGCTTAAGGGTATCCAC
ATTAGTGCAGCCGCTATGAAAGGATAGTCTGTTCGACTATTGCACCCTTATAAGCGGAGG
AAAAGAAACTAACTAGGATTCCCCTAGTAACGGCGAGTGAAGAGGGAAAAGCCCAGCACC
GAATCCCACAGCCTTGCGCTGTCGGGAACTGTGGTGTATAGGAAGCCTACTTGACAGCGT
GTTCGGGTTCCCAAGTCCTCCTGATCGTGGCCTCTCCCATAGCGGGTGTCAGGCCCGTTG
AGGCACCCGACGGCGTTGTCTTGGAGCTTCCTCGGAGTCGGGTTGTTTGGGAATGCAGCC
CAAAGGGGTGGTAAACTCCATCTAAGGCTAAATACGTTCACGAGTCCGATAGCAAACAAG
TACCGTGAGGGAAAGTTGAAAAGAACTTTGAAGAGAGAGTTCAAGAGTACGTGAAACCGC
TTAGAGGCAAACGGGTGGAACCGCAATGTGTCGACCCGGGGGATTCAACCAGTGCGTCGG
GACGGGCGGGGGATGCGGAGCTTCAACGCCCGCGCCTCTGCTTGGTCGCCGGGCGGACTG
GTGCACTTTCCTCGGGTTGATGGCCACGACCGGCTCTCCGCGGCCAAAAGCCTACGACCG
GGAAGGTGACCCCACGCCGCGGTGTTATAGCCCGGCTAG-CCGTCGTGCTCGTCGGAGGG
CCGAGGTTGCCGCTCGTCGCCACCCTCGCCATCCTTGCTCGTCTCGACTGGGTTGTACTG
CTCTGCCAGTGCTCTCCCGACCGCGAGCGTAGGAAGGGCTGGTACGGTGCGACGTGCTTC
GGGCCGGTGGCGAATCGGTCGGTCTTCCACCCGACC
>656_P_rakhinensis
GAACTTTATATTTGCTGTTAGCCTTGTGGTCTGGGTTAATTGGGTTAGCTTTAAGGCTTT
TGATTCGAGCTGAGTTAGGTCAGCCTGGGAGGTTATTAGGGGATGATCAGCTTTATAATG
TAATTGTGACGGCTCATGCTTTTATGATAATTTTCTTTTTAGTTATGCCAATGATGATTG
GGGGATTTGGTAATTGGTTAATTCCTTTAATGATTGGGGCTCCTGATATGGCTTTCCCTC
GATTAAATAATTTGAGATTTTGGTTGCTTGTGCCAGCTTTATTCTTGTTGCTGAGGTCTT
CTTTGGTGGAAAGGGGTGTTGGGACTGGATGGACGGTTTATCCCCCTTTGTCTGGGAATG
TGGCTCATTCGGGAGCTTCTGTTGATTTGGCAATTTTTTCTTTACACCTTGCCGGTGCTT
CTTCCATTCTGGGGGCTATTAACTTTATTTCAACTGTCGGTAATATGCGGTCTCCGGGCT
TGGTGGCTGAGCGCATTCCTTTATTTGTGTGAAGGGTAACTGTGACTGCTGTGTTGTTAG
TGGCCGCTTTGCCTGTACTAGCTGGTGCTATTACTATATTACTTACTGATCGTAATTTAA
ATACATCATTTTTTGACCCTACGGGGGGAGGTGATCCTATTTTATATATGCATTTGTTTT
TCGTCTTTTGTCTAGACAAAATAAAAGATAATGCCTGCCCAGTGAGCTTAAACGGCCGCG
TTAGCGTGAGCGTGCTAAGGTAGCGTAATAAATAGCCTTCTAATTAGAGGCCAGTGAATG
GCAAGACTAGGAATATCTGTACCAGAAAAAAAACTTTTCTTTTGAGTGAAAAGACTCAAA
TACTAAGGAAGACGAAAAGACCCCGCGGAGCTTAACTTAATCAATTTTTAAATTATAAAC
TTCT-TAAAGTTTGATTGGGGCAATCTTGGAACCACACTAACTTCCAATTTTAATAATAA
TTATATAAAACTTAATAAGGACCAAAAAGCAGCTACCCCGGGGATAACAGCGTTATCTAA
CTCAAGAGTACGTATCGAAAGTTAGGTTTGCGACCTCGATGTTGGCTTAAGGGTATCCAC
ATTAGTGCAGCCGCTATGAAAGGATAGTCTGTTCGACTATTGCACCCTTATAAGCGGAGG
AAAAGAAACTAACTAGGATTCCCCTAGTAACGGCGAGTGAAGAGGGAAAAGCCCAGCACC
GAATCCCACAGCCTTGCGCTGTCGGGAACTGTGGTGTATAGGAAGCCTACTTGACAGCGT
GTTCGGGTTCCCAAGTCCTCCTGATCGTGGCCTCTCCCATAGCGGGTGTCAGGCCCGTTG
AGGCACCCGACGGCGTTGTCTTGGAGCTTCCTCGGAGTCGGGTTGTTTGGGAATGCAGCC
CAAAGGGGTGGTAAACTCCATCTAAGGCTAAATACGTTCACGAGTCCGATAGCAAACAAG
TACCGTGAGGGAAAGTTGAAAAGAACTTTGAAGAGAGAGTTCAAGAGTACGTGAAACCGC
TTAGAGGCAAACGGGTGGAACCGCAATGTGTCGACCCGGGGGATTCAACCAGTGCGTCGG
GACGGGCGGGGGATGCGGAGCTTCAACGCCCGCGCCTCTGCTTGGTCGCCGGGCGGACTG
GTGCACTTTCCTCGGGTTGATGGCCACGACCGGCTCTCCGCGGCCAAAAGCCTACGACCG
GGAAGGTGACCCCACGCCGCGGTGTTATAGCCCGGCTAG-CCGTCGTGCTCGTCGGAGGG
CCGAGGTTGCCGCTCGTCGCCACCCTCGCCATCCTTGCTCGTCTCGACTGGGTTGTACTG
CTCTGCCAGTGCTCTCCCGACCGCGAGCGTAGGAAGGGCTGGTACGGTGCGACGTGCTTC
GGGCCGGTGGCGAATCGGTCGGTCTTCCACCCGACC
>660_3_P_rakhinensis
GAACTTTATATTTGCTGTTAGCCCTGTGGTCTGGGTTAATTGGGTTGGCTTTAAGACTTT
TGATTCGAGCTGAGTTAGGTCAGCCTGGGAGGTTATTAGGGGATGATCAGCTTTATAATG
TAATTGTGACGGCTCATGCTTTTATAATAATTTTCTTTTTAGTTATGCCAATGATGATTG
GGGGATTTGGTAATTGGTTAATTCCTTTAATGATTGGGGCTCCTGATATGGCTTTCCCTC
GATTAAATAATTTGAGATTTTGGTTGCTTGTGCCAGCTTTATTCTTGTTGCTGAGGTCTT
CTTTGGTGGAAAGGGGTGTTGGGACTGGATGGACGGTTTATCCCCCTTTGTCTGGGAATG
TGGCTCATTCGGGAGCTTCTGTTGATTTGGCAATTTTTTCTTTACACCTTGCCGGTGCTT
CTTCCATTCTGGGGGCTATTAACTTTATTTCAACTGTTGGTAATATGCGGTCTCCGGGCT
TGGTGGCTGAGCGTATTCCTTTATTTGTGTGAAGGGTAACTGTGACTGCTGTGTTGTTAG
TGGCCGCTTTGCCTGTACTAGCTGGTGCTATTACTATATTACTTACTGATCGTAATTTAA
ATACATCATTTTTTGACCCTACGGGGGGAGGTGATCCTATTTTATATATGCATTTGTTTT
TCGTCTTTTGTCTAGACAAAATAAAAGATAATGCCTGCCCAGTGAGCTTAAACGGCCGCG
TTAGCGTGAGCGTGCTAAGGTAGCGTAATAAATAGCCTTCTAATTAGAGGCCAGTGAATG
GCAAGACTAGGAATATCTGTACCAGAAAAAAAACTTTTCTTTTGAGTGAAAAGACTCAAA
TACTAAGGAAGACGAAAAGACCCCGCGGAGCTTAACTTAATCAATTTTTAAATTATAAAC
TTCT-TAAAGTTTGATTGGGGCAATCTTGGAACCACACTAACTTCCAATTTTAATAATAA
TTATATAAAACTTAATAAGGACCAAAAAGCAGCTACCCCGGGGATAACAGCGTTATCTAA
CTCAAGAGTACGTATCGAAAGTTAGGTTTGCGACCTCGATGTTGGCTTAAGGGTATCCAC
ATTAGTGCAGCCGCTATGAAAGGATAGTCTGTTCGACTATTGCACCCTTATAAGCGGAGG
AAAAGAAACTAACTAGGATTCCCCTAGTAACGGCGAGTGAAGAGGGAAAAGCCCAGCACC
GAATCCCACAGCCTTGCGCTGTCGGGAACTGTGGTGTATAGGAAGCCTACTTGACAGCGT
GTTCGGGTTCCCAAGTCCTCCTGATCGTGGCCTCTCCCATAGCGGGTGTCAGGCCCGTTG
AGGCACCCGACGGCGTTGTCTTGGAGCTTCCTCGGAGTCGGGTTGTTTGGGAATGCAGCC
CAAAGGGGTGGTAAACTCCATCTAAGGCTAAATACGTTCACGAGTCCGATAGCAAACAAG
TACCGTGAGGGAAAGTTGAAAAGAACTTTGAAGAGAGAGTTCAAGAGTACGTGAAACCGC
TTAGAGGCAAACGGGTGGAACCGCAATGTGTCGACCCGGGGGATTCAACCAGTGCGTCGG
GACGGGCGGGGGATGCGGAGCTTCAACGCCCGCGCCTCTGCTTGGTCGCCGGGCGGACTG
GTGCACTTTCCTCGGGTTGATGGCCACGACCGGCTCTCCGCGGCCAAAAGCCTACGACCG
GGAAGGTGACCCCACGCCGCGGTGTTATAGCCCGGCTAG-CCGTCGTGCTCGTCGGAGGG
CCGAGGTTGCCGCTCGTCGCCACCCTCGCCATCCTTGCTCGTCTCGACTGGGTTGTACTG
CTCTGCCAGTGCTCTCCCGACCGCGAGCGTAGGAAGGGCTGGTACGGTGCGACGTGCTTC
GGGCCGGTGGCGAATCGGTCGGTCTTCCACCCGACC
>KP795022_L_olivacea
NNNCTTTATATTTATTGTTGGCTTTGTGATCTGGGTTAATTGGATTGGCTTTGAGGCTTT
TAATTCGAGCTGAGTTAGGTCAACCTGGTAGGTTATTAGGTGATGATCAGCTATATAATG
TTATTGTTACGGCTCATGCTTTTATAATAATTTTCTTTTTGGTGATGCCAATAATAATTG
GAGGGTTTGGTAATTGATTAATTCCTTTGATGATTGGGGCTCCTGATATGGCTTTTCCTC
GTTTAAATAATTTAAGGTTTTGATTACTTGTACCTGCTTTATTTTTACTTTTAAGGTCTT
CTTTAGTAGAGAGTGGTGTTGGAACTGGCTGGACTGTCTATCCTCCTTTATCTGGAAACG
TGGCACATTCTGGGGCCTCTGTGGATTTGGCTATTTTCTCTTTACATCTTGCCGGTGCTT
CTTCTATTTTAGGGGCTATTAATTTCATTTCTACTGTTGGAAATATACGATCTCCTGGAT
TAGTGGCTGAGCGAATTCCATTGTTTGTTTGAAGAGTTACTGTGACAGCTGTTTTATTAG
TAGCTGCTTTACCAGTTTTAGCTGGTGCTATTACTATGCTTCTTACCGATCGTAATTTGA
ATACGTCATTTTTTGATCCGACTGGTGNNNNNNNNNNNNNNNNNNNNNNNNNNNNNNNNN
NCGTCTTTTGCTTAATT-AAATAAAAGATAATGCCTGCCCAGTGAATTTAAACGGCCGCG
TTAGCGTGAGCGTGCTAAGGTAGCGTAATAAATAGCCTTTTAATTGAAGGCCAGTGAATG
GCAAGACTAGGAATAGCTGTACCAAAAAAAAAACTTTTCCTTTGAGTGAAAAGACTCAAA
TATCAAGGAAGACGAAAAGACCCCGCGGAGCTTTACTTCACCAATTTTATAAATTACAAA
ATTTAAGAAGTTTGATTGGGGCAATCTTGGAACAACAGTAACTTCCAATTATAATAATAA
ATATATAAAGCTTAATAAGAAGAAAAAAGTAGCTACCCCGGGGATAACAGCGTTATCTAA
CTTGAGAGTACATATCGAAAGCTAGGTTTGCGACCTCGATGTTGGCTTAAGGGTATCCAC
ATTAGTGCAGCCGCTATGAAAGGATAGTCTGTTCGACTATTGCACCCTTNNNNNNNNNNN
NNNNNNNNNNNNNNNNNNNNNNNNNNNNNNNNNNNNNNNNNNNNNNNNNNNNNNNNNNNN
NNNNNNNNNNNNNNNNNNNNNNNNNNNNNNNNNNNNNNNNNNNNNNNNNNNNNNNNNNNN
NNNNNNNNNNNNNNNNNNNNNNNNNNNNNNNNNNNNNNNNNNNNNNNNNNNNNNNNNNNN
NNNNNNNNNNNNNNNNNNNNNNNNNNNNNNNNNNNNNNNNNNNNNNNNNNNNNNNNNNNN
NNNNNNNNNNNNNNNNNNNNNNNNNNNNNNNNNNNNNNNNNNNNNNNNNNNNNNNNNNNN
NNNNNNNNNNNNNNNNNNNNNNNNNNNNNNNNNNNNNNNNNNNNNNNNNNNNNNNNNNNN
TTAGAGGGAAACGGGTGGAACCGCAATGCGTCGACCCGGGGGATTCAGCCAGTGCACCGC
GGCGGGGCGGAGTGGCGGAGCTTTCGGGCCCGCGCCTCCGCCTAGTCGTCGGGCGGCCTG
TTGCACTTTCCCCGGGCCGATGGCCACGGCCGGCTCTCCGCGGCCAAAAGCCTAAGACCG
GGAAGGTAGCCCGGTGCCGCGGTGTTACAGACCGGCTAG-CCGTCGTGCTCGTCGGAGGG
CCGAGGTTGCCGCTCGCCGCCACCCTAGCCGTCCTGGCTCGTCTACAATGGGTCGCACTG
CT-GGTCAGAGCGCACCCGCCAGCGAGC---TGCAGGGCCGGAAAGGTGAGGCGAGCTCC
GGGCCCGTGGCGAATCGGTCGGCCTTCCNNNNNNNN
>149_L_tavoyensis
GAACTTTATATTTATTGTTGGCTTTATGGTCTGGATTAATTGGGTTGGCTCTGAGGCTTT
TAATCCGAGCTGAGTTGGGTCAACCTGGTAGGTTATTGGGTGATGATCAACTATACAATG
TCATTGTTACAGCTCATGCTTTTATAATAATTTTCTTTTTGGTAATGCCAATGATGATTG
GAGGGTTTGGTAATTGGTTAATCCCTTTAATAATTGGGGCTCCTGATATGGCTTTTCCTC
GTTTGAATAATCTAAGGTTTTGGCTACTTGTGCCTGCTTTATTTTTACTTTTGAGGTCTT
CCTTGGTAGAGAGTGGTGTTGGAACTGGCTGGACTGTTTATCCTCCTTTATCTGGAAATG
TAGCACATTCTGGGGCTTCTGTGGATTTGGCTATTTTTTCTTTACATCTTGCCGGTGCTT
CTTCTATTTTGGGAGCTATTAATTTTATTTCTACTGTTGGAAATATACGATCTCCTGGAT
TAGTGGCTGAGCGAATTCCATTGTTTGTTTGAAGAGTTACTGTGACAGCTGTTTTGTTAG
TAGCTGCTTTGCCAGTTTTAGCTGGTGCCATTACTATGCTCCTTACCGATCGTAACTTAA
ATACGTCATTCTTTGATCCAACTGGTGGTGGTGATCCTATTTTGTATATACATTTGTTTT
TCGTCTTTTGCTTAATT-AAATAAAAGATAATGCCTGCCCAGTGAGCTTAAACGGCCGCG
TTAGCGTGAGCGTGCTAAGGTAGCGTAATAAATAGCCTTTTAATTGAAGGCCAGTGAATG
GCAAGACTAGGAATAGCTGTACCAAAAAAAAAACTTTTCCTTTGAGTGAAAAGACTCAAA
TATTAAGGAAGACGAAAAGACCCCGCGGAGCTTTACTTCACCAATTTTACAAATTACAAA
ATTTTAGAAGTTTGATTGGGGCAATCTTGGAACAACACTAACTTCCAATTATTAAAACAA
ATATATAAAGCTTAATAAGAAGAAAAAAGTAGCTACCCCGGGGATAACAGCGTTATCTAA
CTTGAGAGTACATATCGAAAGCTAGGTTTGCGACCTCGATGTTGGCTTAAGGGTATCCAC
ATTAGTGTAGCCGCTATGAAAGGATAGTCTGTTCGACTATTGCACCCTTATAAGCGGAGG
AAAAGAAACTAACAAGGATTCCCTTAGTAACGGCGAGTGAAGCGGGAAAAGCCCAGCACC
GAATCCCCCAGCCTTGCGCTGTCGGGACCTGTGGTGTATAGGAAGCCCACTTGCCAGCGT
GTTCGGGTACCCAAGTCCTCCTGATCGTGGCCTGTCCCATAGCGGGTGTCAGGCCCGTTG
AGGCACCCGACGGCGCTGGCTCGGAGCTTCCTGAGAGTCGGGTTGTTTGGGAATGCAGCC
CAAAGGGGTGGTAAACTCCATCTAAGGCTAAATACGTTCACGAGTCCGATAGCAAACAAG
TACCGTGAGGGAAAGTTGAAAAGAACTTTGAAGAGAGAGTTCAAGAGTACGTGAAACCGC
TTAGAGGGAAACGGGTGGAACCGCAATGCGTCGACCCGGGGGATTCAGCCAGTGCACCGC
GGCGGGGCGGAGTGGCGGAGCTTTCGGGCCCGCGCCTCCGCCTAGTCGTCGGGCGGCCTG
GTGCACTTTCCCCGGGCCGATGGCCACGGCCGGCTCTCCGCGGCCAAAAGCCTAAGACCG
GGAAGGTAGCCTTGTGCCACGGTGTTACAGACCGGCTAG-CCGTCGTGCTCGTCGGAGGG
CCGAGGTTGCCGCTCGCCGCCACCCTAGCCGTCCTTGCTCGTCTACAATGGGTCGCACTG
CT-GGTCAGAGCGCACCCGCCAGCGAGTCTAG--AGGGCCGGAAAGGTGAGGCGAGCTTC
GGGCCCGTGGCGAATCGGTCGGCCTTCCNNNNNNNN
>266_4_L_tavoyensis
GGACTTTGTATTTATTGTTGGCTTTATGGTCTGGATTAATTGGGTTGGCTCTGAGGCTTT
TAATCCGAGCTGAGTTGGGTCAACCTGGTAGGTTATTGGGTGATGATCAACTATACAATG
TCATTGTTACAGCTCATGCTTTTATAATAATTTTCTTTTTGGTAATGCCAATGATGATTG
GAGGATTTGGTAATTGATTAATCCCTTTAATAATTGGAGCTCCTGATATGGCTTTTCCTC
GTTTGAATAATCTAAGGTTTTGGTTACTTGTGCCTGCTTTATTTTTACTTTTGAGGTCTT
CCTTGGTAGAGAGTGGTGTTGGAACTGGCTGGACTGTTTATCCTCCTTTATCTGGAAATG
TAGCACATTCTGGGGCTTCTGTGGATTTGGCTATTTTTTCTTTACATCTTGCCGGTGCTT
CTTCTATTTTGGGAGCTATTAATTTTATTTCTACTGTTGGAAATATACGATCTCCTGGAT
TAGTGGCTGAGCGAATTCCATTATTTGTTTGAAGAGTTACTGTGACAGCTGTTTTGTTAG
TAGCTGCTTTGCCAGTTTTAGCTGGTGCCATTACTATGCTCCTTACCGATCGTAACTTAA
ATACGTCATTCTTTGATCCAACTGGTGGTGGTGATCCTATTTTGTATATACATTTGTTTT
TCGTCTTTTGCTTAATT-AAATAAAAGATAATGCCTGCCCAGTGAGCTTAAACGGCCGCG
TTAGCGTGAGCGTGCTAAGGTAGCGTAATAAATAGCCTTTTAATTGAAGGCCAGTGAATG
GCAAGACTAGGAATAGCTGTACCAAAAAAAAAACTTTTCCTTTGAGTGAAAAGACTCAAA
TATTAAGGAAGACGAAAAGACCCCGCGGAGCTTTACTTCACCAATTTTACAAATTACAAA
ATTTTAGAAGTTTGATTGGGGCAATCTTGGAACAACACTAACTTCCAATTATTAAAACAA
ATATATAAAGCTTAATAAGAAGAAAAAAGTAGCTACCCCGGGGATAACAGCGTTATCTAA
CTTGAGAGTACATATCGAAAGCTAGGTTTGCGACCTCGATGTTGGCTTAAGGGTATCCAC
ATTAGTGTAGCCGCTATGAAAGGATAGTCTGTTCGACTATTGCACCCTTATAAGCGGAGG
AAAAGAAACTAACAAGGATTCCCTTAGTAACGGCGAGTGAAGCGGGAAAAGCCCAGCACC
GAATCCCCCAGCCTTGCGCTGTCGGGACCTGTGGTGTATAGGAAGCCCACTTGCCAGCGT
GTTCGGGTACCCAAGTCCTCCTGATCGTGGCCTGTCCCATAGCGGGTGTCAGGCCCGTTG
AGGCACCCGACGGCGCTGGCTCGGAGCTTCCTGAGAGTCGGGTTGTTTGGGAATGCAGCC
CAAAGGGGTGGTAAACTCCATCTAAGGCTAAATACGTTCACGAGTCCGATAGCAAACAAG
TACCGTGAGGGAAAGTTGAAAAGAACTTTGAAGAGAGAGTTCAAGAGTACGTGAAACCGC
TTAGAGGGAAACGGGTGGAACCGCAATGCGTCGACCCGGGGGATTCAGCCAGTGCACCGC
GGCGGGGCGGAGTGGCGGAGCTTTCGGGCCCGCGCCTCCGCCTAGTCGTCGGGCGGCCTG
GTGCACTTTCCCCGGGCCGATGGCCACGGCCGGCTCTCCGCGGCCAAAAGCCTAAGACCG
GGAAGGTAGCCTTGTGCCACGGTGTTACAGACCGGCTAG-CCGTCGTGCTCGTCGGAGGG
CCGAGGTTGCCGCTCGCCGCCACCCTAGCCGTCCTTGCTCGTCTACAATGGGTCGCACTG
CT-GGTCAGAGCGCACCCGCCAGCGAGTCTAG--AGGGCCGGAAAGGTGAGGCGAGCTTC
GGGCCCGTGGCGAATCGGTCGGCCTTCCNNNNNNNN
>634_1_L_tavoyensis
GGACTTTATATTTATTGTTGGCTTTATGGTCTGGATTAATTGGGTTGGCTCTGAGGCTTT
TGATCCGGGCTGAGTTGGGTCAACCTGGTAGGTTATTGGGTGATGATCAACTATACAATG
TCATTGTTACAGCTCATGCTTTTATAATAATTTTCTTTTTGGTAATGCCAATGATGATTG
GAGGATTTGGTAATTGGTTAATCCCTTTAATAATTGGGGCTCCTGATATGGCTTTTCCTC
GTTTGAATAATCTAAGGTTTTGGCTACTTGTGCCTGCTTTATTTTTACTTTTGAGGTCTT
CCTTGGTAGAGAGTGGTGTTGGAACTGGCTGGACTGTTTATCCTCCTTTATCTGGAAATG
TAGCACATTCTGGGGCTTCTGTGGATTTGGCTATTTTTTCTTTACATCTTGCCGGTGCTT
CTTCTATTTTGGGAGCTATTAATTTTATTTCTACTGTTGGAAATATACGATCTCCTGGAT
TAGTGGCTGAGCGAATTCCATTATTTGTTTGAAGAGTTACTGTGACAGCTGTTTTGTTAG
TAGCTGCTTTGCCAGTTTTAGCTGGTGCCATTACTATGCTCCTTACCGATCGTAACTTAA
ATACATCATTCTTTGATCCAACTGGTGGTGGTGATCCTATTTTATATATACATTTGTTTT
TCGTCTTTTGCTTAATT-AAATAAAAGATAATGCCTGCCCAGTGAGCTTAAACGGCCGCG
TTAGCGTGAGCGTGCTAAGGTAGCGTAATAAATAGCCTTTTAATTGAAGGCCAGTGAATG
GCAAGACTAGGAATAGCTGTACCAAAAAAAAAACTTTTCCTTTGAGTGAAAAGACTCAAA
TATTAAGGAAGACGAAAAGACCCCGCGGAGCTTTACTTCACCAATTTTACAAATCACAAA
ATTTTAGAAGTTTGATTGGGGCAATCTTGGAACAACACTAACTTCCAATTATTAAAACAA
ATATATAAAGCTTAATAAGAAGAAAAAAGTAGCTACCCCGGGGATAACAGCGTTATCTAA
CTTGAGAGTACATATCGAAAGCTAGGTTTGCGACCTCGATGTTGGCTTAAGGGTATCCAC
ATTAGTGTAGCCGCTATGAAAGGATAGTCTGTTCGACTATTGCACCCTTATAAGCGGAGG
AAAAGAAACTAACAAGGATTCCCTTAGTAACGGCGAGTGAAGCGGGAAAAGCCCAGCACC
GAATCCCCCAGCCTTGCGCTGTCGGGACCTGTGGTGTATAGGAAGCCCACTTGCCAGCGT
GTTCGGGTACCCAAGTCCTCCTGATCGTGGCCTGTCCCATAGCGGGTGTCAGGCCCGTTG
AGGCACCCGACGGCGCTGGCTCGGAGCTTCCTGAGAGTCGGGTTGTTTGGGAATGCAGCC
CAAAGGGGTGGTAAACTCCATCTAAGGCTAAATACGTTCACGAGTCCGATAGCAAACAAG
TACCGTGAGGGAAAGTTGAAAAGAACTTTGAAGAGAGAGTTCAAGAGTACGTGAAACCGC
TTAGAGGGAAACGGGTGGAACCGCAATGCGTCGACCCGGGGGATTCAGCCAGTGCACCGC
GGCGGGGCGGAGTGGCGGAGCTTTCGGGCCCGCGCCTCCGCCTAGTCGTCGGGCGGCCTG
GTGCACTTTCCCCGGGCCGATGGCCACGGCCGGCTCTCCGCGGCCAAAAGCCTAAGACCG
GGAAGGTAGCCTAGTGCCGCGGTGTTACAGACCGGCTAG-CCGTCGTGCTCGTCGGAGGG
CCGAGGTTGCCGCTCGCCGCCACCCTAGCCGTCCTTGCTCGTCTACAATGGGTCGCACTG
CT-GGTCAGAGCGCACCCGCCAGCGAGTCTAG--AGGGCCGGAAAGGTGAGGCGAGCTTC
GGGCCCGTGGCGAATCGGTCGGCCTTCCACCCGACC
>249_L_canefrii
GGACTTTATATCTTTTGTTGGCTTTGTGGTCTGGATTAATTGGGTTGGCTTTGAGGCTTT
TAATTCGAGCTGAGTTAGGACAACCTGGTAGGTTATTGGGTGATGATCAATTATATAATG
TTATTGTTACGGCTCATGCTTTTATAATAATTTTCTTTTTGGTAATGCCAATAATGATTG
GAGGATTTGGTAATTGGTTGATTCCTTTAATGATTGGGGCTCCTGATATAGCTTTCCCTC
GTCTGAATAATTTAAGGTTTTGGTTACTTGTACCTGCTTTATTTTTGCTTTTGAGGTCTT
CTTTGGTAGAGAGTGGTGTTGGAACTGGTTGGACTGTTTATCCTCCTTTGTCTGGAAACG
TAGCACATTCTGGGGCCTCTGTGGATTTAGCTATTTTCTCTTTACATCTTGCCGGTGCTT
CTTCTATTTTAGGAGCTATTAATTTTATTTCTACTGTTGGAAATATACGGTCCCCTGGAA
TAATAGCTGAGCGAATTCCATTATTTGTTTGAAGTGTTACTGTGACAGCTGTTTTATTAG
TAGCTGCTTTACCAGTTTTAGCTGGTGCCATTACTATGCTTCTTACCGATCGTAACTTGA
ATACGTCATTTTTTGATCCAACTGGTGGTGGTGATCCCATTTTGTACATACATTTGTTCT
TCGTCTTTTGCTCAATT-AAATAAAAGATAATGCCTGCCCAGTGAATTTAAACGGCCGCG
TTAGCGTGAGCGTGCTAAGGTAGCGTAATAAATAGCCTTTTAATTGAAGGCCAGTGAATG
GCAAGACTAGGAATAGCTGTACCAAAAAAAAAACTTTTCCTTTGAGTGAAAAGACTCAAA
TATCAAGGAAGACGAAAAGACCCCGCGGAGCTTAACTTCACCAATTTTATAAATCACAAA
ATTTTAGAAGTTTGATTGGGGCAATCTTGGAACAATAATAACTTCCAATTATAATAATAA
ATATATAAAGCTTAATAAGAAGAAAAAAGTAGCTACCCCGGGGATAACAGCGTTATCTAA
CTTGAGAGTACATATCGAAAGCTAGGTTTGCGACCTCGATGTTGGCTTAAGGGTATCCAC
ATTAGTGCAGCCGCTATGAAAGGATAGTCTGTTCGACTATTGCACCCTTATAAGCGGAGG
AAAAGAAACTAACAAGGATTCCCTTAGTAACGGCGAGTGAAGCGGGAAAAGCCCAGCACC
GAATCCCCCAGCCTTGCGCTGTCGGGACCTGTGGTGTATAGGAAGCCCACTTGCCAGCGT
GTTCGGGTACCCAAGTCCTCCTGATCGTGGCCTGTCCCATAGCGGGTGTCAGGCCCGTTG
AGGCACCCGACGGCGCTGGCTCGGAGCTTCCTGGGAGTCGGGTTGTTTGGGAATGCAGCC
CAAAGGGGTGGTAAACTCCATCTAAGGCTAAATACGTTCACGAGTCCGATAGCAAACAAG
TACCGTGAGGGAAAGTTGAAAAGAACTTTGAAGAGAGAGTTCAAGAGTACGTGAAACCGC
TTAGAGGGAAACGGGTGGAACCGCAATGCGTCGACCCGGGGGATTCAGCCAGTGCACCGC
GGCGGGGCGGAGTGGCGGAGCTTTCGGGCCCGCGCCTCCGCTTAGTCGTCGGGCGGCCTG
GTGCACTTTCCCCGGGCCGATGGCCACGGCCGGCTCTCCGCGGCCAAAAGCCTAAGACCG
GGAAGGTAGCCTGGTGCCGCGGTGTTACAGACCGGCTAG-CCGTCGTGCTCGTCGGAGGG
CCGAGGTTGCCGCTCGCCGCCACCCTAGCCGTCCTTGCTCGTCTACAATGGGTCGCACTG
CT-GGTCAGAGCGCACCCGCCTGCGAGTCTAG--AGGGCCGGAAAGGTGAGGCGAGCTTC
GGGCCCGTGGCGAATCGGTCGGCCTTCCNNNNNNNN
>252_1_L_canefrii
GGACTTTATATCTTTTGTTGGCTTTGTGGTCTGGATTAATTGGGTTGGCTTTGAGGCTTT
TAATTCGAGCTGAGTTAGGACAACCTGGTAGGTTATTGGGTGATGATCAATTATATAATG
TTATTGTTACGGCTCATGCTTTTATAATAATTTTCTTTTTGGTAATGCCAATAATGATTG
GAGGATTTGGTAATTGGTTGATTCCTTTAATGATTGGGGCTCCTGATATAGCTTTCCCTC
GTCTGAATAATTTAAGGTTTTGGTTACTTGTACCTGCTTTATTTTTGCTTTTGAGGTCTT
CTTTGGTAGAGAGTGGTGTTGGAACTGGTTGGACTGTTTATCCTCCTTTGTCTGGAAACG
TAGCACATTCTGGGGCCTCTGTGGATTTAGCTATTTTCTCTTTACATCTTGCCGGTGCTT
CTTCTATTTTAGGAGCTATTAATTTTATTTCTACTGTTGGAAATATACGGTCCCCTGGAA
TAGTAGCTGAGCGAATTCCATTATTTGTTTGAAGTGTTACTGTGACAGCTGTTTTATTAG
TAGCTGCTTTACCAGTTTTAGCTGGTGCCATTACTATGCTTCTTACCGATCGTAACTTGA
ATACGTCATTTTTTGATCCAACTGGTGGTGGTGATCCCATTTTGTACATACATTTGTTCT
TCGTCTTTTGCTCAATT-AAATAAAAGATAATGCCTGCCCAGTGAATTTAAACGGCCGCG
TTAGCGTGAGCGTGCTAAGGTAGCGTAATAAATAGCCTTTTAATTGAAGGCCAGTGAATG
GCAAGACTAGGAATAGCTGTACCAAAAAAAAAACTTTTCCTTTGAGTGAAAAGACTCAAA
TATCAAGGAAGACGAAAAGACCCCGCGGAGCTTAACTTCACCAATTTTATAAATCACAAA
ATTTTAGAAGTTTGATTGGGGCAATCTTGGAACAATAATAACTTCCAATTATAATAATAA
ATATATAAAGCTTAATAAGAAGAAAAAAGTAGCTACCCCGGGGATAACAGCGTTATCTAA
CTTGAGAGTACATATCGAAAGCTAGGTTTGCGACCTCGATGTTGGCTTAAGGGTATCCAC
ATTAGTGCAGCCGCTATGAAAGGATAGTCTGTTCGACTATTGCACCCTTATAAGCGGAGG
AAAAGAAACTAACAAGGATTCCCTTAGTAACGGCGAGTGAAGCGGGAAAAGCCCAGCACC
GAATCCCCCAGCCTTGCGCTGTCGGGACCTGTGGTGTATAGGAAGCCCACTTGCCAGCGT
GTTCGGGTACCCAAGTCCTCCTGATCGTGGCCTGTCCCATAGCGGGTGTCAGGCCCGTTG
AGGCACCCGACGGCGCTGGCTCGGAGCTTCCTGGGAGTCGGGTTGTTTGGGAATGCAGCC
CAAAGGGGTGGTAAACTCCATCTAAGGCTAAATACGTTCACGAGTCCGATAGCAAACAAG
TACCGTGAGGGAAAGTTGAAAAGAACTTTGAAGAGAGAGTTCAAGAGTACGTGAAACCGC
TTAGAGGGAAACGGGTGGAACCGCAATGCGTCGACCCGGGGGATTCAGCCAGTGCACCGC
GGCGGGGCGGAGTGGCGGAGCTTTCGGGCCCGCGCCTCCGCTTAGTCGTCGGGCGGCCTG
GTGCACTTTCCCCGGGCCGATGGCCACGGCCGGCTCTCCGCGGCCAAAAGCCTAAGACCG
GGAAGGTAGCCTGGTGCCGCGGTGTTACAGACCGGCTAG-CCGTCGTGCTCGTCGGAGGG
CCGAGGTTGCCGCTCGCCGCCACCCTAGCCGTCCTTGCTCGTCTACAATGGGTCGCACTG
CT-GGTCAGAGCGCACCCGCCTGCGAGTCTAG--AGGGCCGGAAAGGTGAGGCGAGCTTC
GGGCCCGTGGCGAATCGGTCGGCCTTCCNNNNNNNN
>252_2_L_canefrii
GGACTTTATATCTTTTGTTGGCTTTGTGGTCTGGATTAATTGGGTTGGCTTTGAGGCTTT
TAATTCGAGCTGAGTTAGGACAACCTGGTAGGTTATTGGGTGATGATCAATTATATAATG
TTATTGTTACGGCTCATGCTTTTATAATAATTTTCTTTTTGGTAATGCCAATAATGATTG
GAGGATTTGGTAATTGGTTGATTCCTTTAATGATTGGGGCTCCTGATATAGCTTTCCCTC
GTCTGAATAATTTAAGGTTTTGGTTACTTGTACCTGCTTTATTTTTGCTTTTGAGGTCTT
CTTTGGTAGAGAGTGGTGTTGGAACTGGTTGGACTGTTTATCCTCCTTTGTCTGGAAACG
TAGCACATTCTGGGGCCTCTGTGGATTTAGCTATTTTCTCTTTACATCTTGCCGGTGCTT
CTTCTATTTTAGGAGCTATTAATTTTATTTCTACTGTTGGAAATATACGGTCTCCTGGAT
TAGTAGCTGAGCGAATTCCATTATTTGTTTGAAGTGTTACTGTGACAGCTGTTTTATTAG
TAGCTGCTTTACCAGTTTTAGCTGGTGCCATTACTATGCTTCTTACCGATCGTAACTTGA
ATACGTCATTTTTTGATCCAACTGGTGGTGGTGATCCCATTTTGTACATACATTTGTTCT
TCGTCTTTTGCTCAATT-AAATAAAAGATAATGCCTGCCCAGTGAATTTAAACGGCCGCG
TTAGCGTGAGCGTGCTAAGGTAGCGTAATAAATAGCCTTTTAATTGAAGGCCAGTGAATG
GCAAGACTAGGAATAGCTGTACCAAAAAAAAAACTTTTCCTTTGAGTGAAAAGACTCAAA
TATCAAGGAAGACGAAAAGACCCCGCGGAGCTTAACTTCACCAATTTTATAAATCACAAA
ATTTTAGAAGTTTGATTGGGGCAATCTTGGAACAATAATAACTTCCAATTATAATAATAA
ATATATAAAGCTTAATAAGAAGAAAAAAGTAGCTACCCCGGGGATAACAGCGTTATCTAA
CTTGAGAGTACATATCGAAAGCTAGGTTTGCGACCTCGATGTTGGCTTAAGGGTATCCAC
ATTAGTGCAGCCGCTATGAAAGGATAGTCTGTTCGACTATTGCACCCTTATAAGCGGAGG
AAAAGAAACTAACAAGGATTCCCTTAGTAACGGCGAGTGAAGCGGGAAAAGCCCAGCACC
GAATCCCCCAGCCTTGCGCTGTCGGGACCTGTGGTGTATAGGAAGCCCACTTGCCAGCGT
GTTCGGGTACCCAAGTCCTCCTGATCGTGGCCTGTCCCATAGCGGGTGTCAGGCCCGTTG
AGGCACCCGACGGCGCTGGCTCGGAGCTTCCTGGGAGTCGGGTTGTTTGGGAATGCAGCC
CAAAGGGGTGGTAAACTCCATCTAAGGCTAAATACGTTCACGAGTCCGATAGCAAACAAG
TACCGTGAGGGAAAGTTGAAAAGAACTTTGAAGAGAGAGTTCAAGAGTACGTGAAACCGC
TTAGAGGGAAACGGGTGGAACCGCAATGCGTCGACCCGGGGGATTCAGCCAGTGCACCGC
GGCGGGGCGGAGTGGCGGAGCTTTCGGGCCCGCGCCTCCGCTTAGTCGTCGGGCGGCCTG
GTGCACTTTCCCCGGGCCGATGGCCACGGCCGGCTCTCCGCGGCCAAAAGCCTAAGACCG
GGAAGGTAGCCTGGTGCCGCGGTGTTACAGACCGGCTAG-CCGTCGTGCTCGTCGGAGGG
CCGAGGTTGCCGCTCGCCGCCACCCTAGCCGTCCTTGCTCGTCTACAATGGGTCGCACTG
CT-GGTCAGAGCGCACCCGCCTGCGAGTCTAG--AGGGCCGGAAAGGTGAGGCGAGCTTC
GGGCCCGTGGCGAATCGGTCGGCCTTCCNNNNNNNN
>424_3_L_burmana
GAACTTTATATTTATTGCTGGCTTTGTGATCTGGATTGATTGGGTTAGCTTTAAGGCTTT
TAATTCGAGCTGAGTTAGGCCAGCCTGGTAGGTTATTAGGTGATGATCAATTGTATAATG
TTATTGTTACAGCTCATGCTTTTATAATAATTTTTTTCTTAGTAATGCCAATGATAATTG
GAGGATTTGGAAATTGGTTAATTCCTCTAATAATTGGGGCTCCTGATATGGCTTTTCCTC
GTTTAAATAATTTAAGATTTTGATTACTTGTACCTGCTTTGTTTTTACTTTTAAGGTCTT
CTTTAGTAGAAAGTGGCGTTGGAACTGGTTGAACTGTTTATCCTCCTTTGTCAGGGAATG
TAGCACATTCTGGAGCTTCTGTAGACTTAGCTATTTTTTCTTTGCATCTTGCTGGTGCTT
CTTCTATTTTAGGAGCTATTAATTTTATTTCTACTGTTGGGAATATGCGGTCTCCTGGAT
TGGTGGCTGAGCGAATTCCTTTATTTGTTTGAAGGGTTACTGTGACTGCTGTTCTATTAG
TAGCTGCTTTGCCTGTTTTGGCTGGTGCTATTACTATACTTCTTACTGATCGTAATTTAA
ACACATCATTTTTTGACCCTACTGGTGGTGGTGACCCTATTTTGTATATGCATTTGTTTT
TCGTCTTTTGTTAAACC-CAATAAAAGATAATGCCTGCCCAGTGAATTTAAACGGCCGCG
TTAGCGTGAGCGTGCTAAGGTAGCGTAATAAATAGCCTTTTAATTGAAGGCCAGTGAATG
GCAAGACTAAGAATAGCTGTACCAGAAAAAAAACTTTTCCTTTGAGTGAAAAGACTCAAA
TATCTAGGAAGACGAAAAGACCCCGCGGAGCTTTACTTCACCAATTTTTAAATTTACGAA
ATTTCAAAAGTTTGATTGGGGCAATCTTGGAACAACACTAACTTCCAATTATTCTAACAA
TTATATAAAACTTAATAAGAACAAAAAAGCAGCTACCCCGGGGATAACAGCGTTATCTAA
CTTGAGAGTACATATCGAAAGCTAGGTTTGCGACCTCGATGTTGGCTTAAGGGTATCCAC
ATTAGTGCAGCCGCTATGAAAGGATAGTCTGTTCGACTATTGCACCCTTATAAGCGGAGG
AAAAGAAACTAACAAGGATTCCCTTAGTAACGGCGAGTGAAGCGGGAAAAGCCCAGCACC
GAATCCCCCAGCCTTGCGCTGTCGGGACCTGTGGTGTATAGGAAGCCTACTTGCCAGCGT
GTTCGGGTCCCCAAGTCCTCCTGATCGTGGCCTCTCCCATAGCGGGTGTCAGGCCCGTTG
AGGCACCCGACGGCGCTGGCTCGGAGCTTCCTCGGAGTCGGGTTGTTTGGGATTGCAGCC
CAAAGGGGTGGTAAACTCCATCTAAGGCTAAATACGTTCACGAGTCCGATAGCAAACAAG
TACCGTGAGGGAAAGTTGAAAAGAACTTTGAAGAGAGAGTTCAAGAGTACGTGAAACCGC
TTAGAGGGAAACGGGTGGAACCGCAA-AAGGCGACCCGGGGGATTCAGCCAGTGCGCCGC
GGTGAGGCGGGGGTGCGGAGCTGCCAAGTCCGCGCCCCCGCCCCGTCACCGGGCGGCCTG
GTGCACTTTCCTCGGGTCGACGGCCACGGCCGGCTCTCCGCGGCCAAAAGCCTAAGACCG
GGAAGGTAGCCTGGTCCCGCGGTGTTACAGACCGGCTAGCCGTCTGTGCTCGTCGGAGGG
CCGAGGCTGCCGCTCGCCACCACCCTCGTCCGTCTGTCTCGTCTATAATGGGTCGCACTG
CT-GGTCAGAGCTTTCCCGCCAGCGAGCGCAG---GGGCCGGAAAGGTGAGGCGAGCTCC
GGGCCCGTGGCGAATCGGTCGGCCTTCCACCCGACC
>419_3_L_burmana
GAACTTTATATTTATTGCTGGCTTTGTGATCTGGATTGATTGGGTTAGCTTTAAGGCTTT
TAATTCGAGCTGAGTTAGGTCAGCCTGGTAGGTTATTAGGTGATGATCAATTGTATAATG
TTATTGTTACAGCTCATGCTTTTATAATAATTTTTTTCTTAGTAATGCCAATGATAATTG
GAGGATTTGGAAATTGGTTAATTCCTCTAATAATTGGGGCTCCTGATATGGCTTTTCCTC
GTTTAAATAATTTAAGATTTTGATTACTTGTACCTGCTTTGTTTTTACTTTTAAGGTCTT
CTTTAGTAGAAAGTGGCGTTGGAACTGGTTGAACTGTTTATCCTCCTTTGTCAGGGAATG
TAGCACATTCTGGAGCTTCTGTAGACTTAGCTATTTTTTCTTTGCATCTTGCTGGTGCTT
CTTCTATTTTAGGAGCTATTAATTTTATTTCTACTGTTGGGAATATGCGGTCTCCTGGAT
TGGTGGCTGAGCGAATTCCTTTATTTGTTTGAAGGGTTACTGTGACTGCTGTTTTATTAG
TAGCTGCTTTGCCTGTTTTGGCTGGTGCTATTACTATACTTCTTACTGATCGTAATTTAA
ACACATCATTTTTTGACCCTACTGGTGGTGGTGACCCTATTTTGTATATGCATTTGTTTT
TCGTCTTTTGTTAAACC-CAATAAAAGATAATGCCTGCCCAGTGAATTTAAACGGCCGCG
TTAGCGTGAGCGTGCTAAGGTAGCGTAATAAATAGCCTTTTAATTGAAGGCCAGTGAATG
GCAAGACTAAGAATAGCTGTACCAGAAAAAAAACTTTTCCTTTGAGTGAAAAGACTCAAA
TATCTAGGAAGACGAAAAGACCCCGCGGAGCTTTACTTCACCAATTTTTAAATTTACGAA
ATTTCAAAAGTTTGATTGGGGCAATCTTGGAACAACACTAACTTCCAATTATTCTAACAA
TTATATAAAACTTAATAAGAACAAAAAAGCAGCTACCCCGGGGATAACAGCGTTATCTAA
CTTGAGAGTACATATCGAAAGCTAGGTTTGCGACCTCGATGTTGGCTTAAGGGTATCCAC
ATTAGTGCAGCCGCTATGAAAGGATAGTCTGTTCGACTATTGCACCCTTATAAGCGGAGG
AAAAGAAACTAACAAGGATTCCCTTAGTAACGGCGAGTGAAGCGGGAAAAGCCCAGCACC
GAATCCCCCAGCCTTGCGCTGTCGGGACCTGTGGTGTATAGGAAGCCTACTTGCCAGCGT
GTTCGGGTCCCCAAGTCCTCCTGATCGTGGCCTCTCCCATAGCGGGTGTCAGGCCCGTTG
AGGCACCCGACGGCGCTGGCTCGGAGCTTCCTCGGAGTCGGGTTGTTTGGGATTGCAGCC
CAAAGGGGTGGTAAACTCCATCTAAGGCTAAATACGTTCACGAGTCCGATAGCAAACAAG
TACCGTGAGGGAAAGTTGAAAAGAACTTTGAAGAGAGAGTTCAAGAGTACGTGAAACCGC
TTAGAGGGAAACGGGTGGAACCGCAA-AAGGCGACCCGGGGGATTCAGCCAGTGCGCCGC
GGTGAGGCGGGGGTGCGGAGCTGCCAAGTCCGCGCCCCCGCCCCGTCACCGGGCGGCCTG
GTGCACTTTCCTCGGGTCGACGGCCACGGCCGGCTCTCCGCGGCCAAAAGCCTAAGACCG
GGAAGGTAGCCTGGTCCCGCGGTGTTACAGACCGGCTAGCCGTCTGTGCTCGTCGGAGGG
CCGAGGCTGCCGCTCGCCACCACCCTCGTCCGTCTGTCTCGTCTATAATGGGTCGCACTG
CT-GGTCAGAGCTTTCCCGCCAGCGAGCGCAG---GGGCCGGAAAGGTGAGGCGAGCTCC
GGGCCCGTGGCGAATCGGTCGGCCTTCCACCCGACC
>350_1_L_burmana
GAACTTTATATTTATTGCTGGCTTTGTGATCTGGATTGATTGGGTTAGCTTTAAGGCTTT
TAATTCGAGCTGAGTTAGGCCAGCCTGGTAGGTTATTAGGTGATGATCAATTGTATAATG
TTATTGTTACAGCTCATGCTTTTATAATAATTTTTTTCTTAGTAATGCCAATGATAATTG
GAGGATTTGGAAATTGGTTAATTCCTCTAATAATTGGGGCTCCTGATATGGCTTTTCCTC
GTTTAAATAATTTAAGATTTTGATTACTTGTACCTGCTTTGTTTTTACTTTTAAGGTCTT
CTTTAGTAGAAAGTGGCGTTGGAACTGGTTGAACTGTTTATCCTCCTTTGTCAGGGAATG
TAGCACATTCTGGAGCTTCTGTAGACTTAGCTATTTTTTCTTTGCATCTTGCTGGTGCTT
CTTCTATTTTAGGAGCTATTAATTTTATTTCTACTGTTGGGAATATGCGGTCTCCTGGGT
TGGTGGCTGAGCGAATTCCTTTATTTGTTTGAAGGGTTACTGTGACTGCTGTTTTATTAG
TAGCTGCTTTGCCTGTTTTGGCTGGTGCTATTACTATACTTCTTACTGATCGTAATTTAA
ACACATCATTTTTTGACCCTACTGGTGGTGGTGACCCTATTTTGTATATGCATTTGTTTT
TCGTCTTTTGTTAAACC-CAATAAAAGATAATGCCTGCCCAGTGAATTTAAACGGCCGCG
TTAGCGTGAGCGTGCTAAGGTAGCGTAATAAATAGCCTTTTAATTGAAGGCCAGTGAATG
GCAAGACTAAGAATAGCTGTACCAGAAAAAAAACTTTTCCTTTGAGTGAAAAGACTCAAA
TATCTAGGAAGACGAAAAGACCCCGCGGAGCTTTACTTCACCAATTTTCAAATTTACGAA
ATTTCAAAAGTTTGATTGGGGCAATCTTGGAACAACACTAACTTCCAATTATTCTAACAA
TTATATAAAACTTAATAAGAACAAAAAAGCAGCTACCCCGGGGATAACAGCGTTATCTAA
CTTAAGAGTACATATCGAAAGCTAGGTTTGCGACCTCGATGTTGGCTTAAGGGTATCCAC
ATTAGTGCAGCCGCTATGAAAGGATAGTCTGTTCGACTATTGCACCCTTATAAGCGGAGG
AAAAGAAACTAACAAGGATTCCCTTAGTAACGGCGAGTGAAGCGGGAAAAGCCCAGCACC
GAATCCCCCAGCCTTGCGCTGTCGGGACCTGTGGTGTATAGGAAGCCTACTTGCCAGCGT
GTTCGGGTCCCCAAGTCCTCCTGATCGTGGCCTCTCCCATAGCGGGTGTCAGGCCCGTTG
AGGCACCCGACGGCGCTGGCTCGGAGCTTCCTCGGAGTCGGGTTGTTTGGGATTGCAGCC
CAAAGGGGTGGTAAACTCCATCTAAGGCTAAATACGTTCACGAGTCCGATAGCAAACAAG
TACCGTGAGGGAAAGTTGAAAAGAACTTTGAAGAGAGAGTTCAAGAGTACGTGAAACCGC
TTAGAGGGAAACGGGTGGAACCGCAA-AAGGCGACCCGGGGGATTCAGCCAGTGCGCCGC
GGTGAGGCGGGGGTGCGGAGCTGCCCAGTCCGCGCCCCCGCCCCGTCACCGGGCGGCCTG
GTGCACTTTCCTCGGGTCGACGGCCACGGCCGGCTCTCCGCGGCCAAAAGCCTAAGACCG
GGAAGGTAGCCTGGTCCCGCGGTGTTACAGACCGGCTAGCCGTCTGTGCTCGTCGGAGGG
CCGAGGCTGCCGCTCGCCACCACCCTCGTCCGTCTGTCTCGTCTATAATGGGTCGCACTG
CT-GGTCAGAGCTTTCCCGCCAGCGAGCGCAG---GGGCCGGAAAGGTGAGGCGAGCTCC
GGGCCCGTGGCGAATCGGTCGGCCTTCCACCCGACC
>349_L_whitteni
GAACTTTATATTTACTGTTAGCTTTGTGGTCTGGGTTAATTGGGTTGGCTTTGAGCCTTT
TGATTCGAGCTGAATTGGGTCAACCTGGTAGATTATTAGGGGATGATCAATTATACAATG
TTATTGTCACGGCTCATGCTTTTATAATAATTTTCTTTTTGGTGATGCCAATAATGATTG
GGGGGTTTGGAAATTGATTAATTCCTTTGATAATTGGGGCTCCTGACATGGCTTTTCCTC
GTCTAAATAATTTAAGGTTTTGGTTACTTGTACCTGCTTTGTTTTTGCTTTTAAGATCTT
CTTTAGTGGAAAGTGGTGTTGGGACTGGTTGAACTGTTTATCCTCCTTTGTCGGGTAACG
TGGCGCATTCTGGAGCTTCTGTAGATTTGGCTATTTTCTCTTTACACCTTGCTGGTGCTT
CTTCTATTCTAGGGGCTATTAATTTTATCTCTACTGTGGGGAATATACGATCTCCTGGGT
TAGTGGCTGAGCGAATCCCTTTATTTGTTTGAAGAGTTACTGTAACTGCTGTTTTGTTGG
TAGCTGCTTTACCGGTTTTAGCTGGTGCTATTACTATACTTCTTACTGATCGTAATTTGA
ATACATCATTTTTTGACCCTACTGGTGGTGGTGACCCTATTTTGTATATACATTTATTTT
TCGTCTTTTGCCAAATT-TAATAAAAGATAATGCCTGCCCAGTGAATTTAAACGGCCGCG
TTAGCGTGAGCGTGCTAAGGTAGCGTAATAAATAGCCTTTTTATTGAAGGCCAGTGAATG
GCAAGACTAGGAATACCTGTACCAGAAAAAAAACTTTTCCTTTGAGTGAAAAGACTCAAA
TATTCAGGAAGACGAAAAGACCCCGCGGAGCTTTACTCTACCGATCTTAAAAATCACAAA
ATCTTAAAAGTTTGATTGGGGCAATCTTGGAACAACACCAACTTCCAATTATAATAATAA
CTATACAAAACTTAATAAGAACAAAAAAGCAGCTACCCCGGGGATAACAGCGTTATCTAA
CTTGAGAGTACATATCGAAAGCTAGGTTTGCGACCTCGATGTTGGCTTAAGGGTATCCAC
ATTAGTGCAGCCGCTATGAAAGGATAGTCTGTTCGACTATTGCACCCTTATAAGCGGAGG
AAAAGAAACTAACAAGGATTCCCTTAGTAACGGCGAGTGAAGCGGGAAAAGCCCAGCACC
GAATCCCCCAGCCTTGCGCTGTCGGGACCTGTGGTGTATAGGAAGCCTACCTGCCAGCGT
GTTCGGGTACCCAAGTCCTCCTGATCGTGGCCTCTCCCATAGCGGGTGTCAGGCCCGTTG
AGGCACCCGACGGCGCTGGCTCGGAGCTTCCTCGGAGTCGGGTTGTTTGGGATTGCAGCC
CAAAGGGGTGGTAAACTCCATCTAAGGCTAAATACGTTCACGAGTCCGATAGCAAACAAG
TACCGTGAGGGAAAGTTGAAAAGAACTTTGAAGAGAGAGTTCAAGAGTACGTGAAACCGC
TTAGAGGGAAACGGGTGGAACCGCAA-GAGTCGATCCGGGGGATTCAGCCAGTGCACCGC
GGCGGGGCGTGGGTGCGGAGCC-GAGAGCCCGCGCCTGCGCCCAGTCTCCGGGCGGCCTG
GTGCACTTTCCTCGGGGCGATGGTCACGGCCGGCCCTCCGCGGCCAGAAGCCTAGAACCG
GGAAGGTAGCCTGGTCCCGGGGTGTTACAGACCGGCTAG-TTGCCCTGCTCGTCGGAGGG
CTGAGGCTGCCGCTCGCCACCACCCTCGTCAGTCTGGCTCGTCTATAATGGGAAGCACTG
CT-GGTCAGAGC-CTCCCGCCTGCGAGTCC----AGGTCCGGAACGGTGAGGCGAGCTCC
GGGCCCGTGACGAATCGGTCGGCCTTCCACCCGACC
>435_L_whitteni
GAACTTTGTATTTACTGTTGGCTTTGTGGTCTGGGTTAATTGGGTTGGCTTTGAGCCTTT
TGATTCGAGCTGAATTGGGTCAACCTGGTAGATTATTAGGGGATGATCAATTATACAATG
TTATTGTCACGGCTCATGCTTTTATAATAATTTTCTTTTTGGTAATGCCAATAATGATTG
GGGGGTTTGGAAATTGATTAATTCCTTTGATAATTGGGGCTCCTGACATGGCTTTTCCTC
GTCTAAATAATTTAAGGTTTTGGTTACTTGTACCTGCTTTGTTTTTGCTTTTAAGATCTT
CTTTGGTGGAAAGTGGTGTTGGGACTGGTTGAACTGTTTATCCTCCTTTGTCGGGTAACG
TGGCACATTCTGGAGCTTCTGTAGATTTGGCTATTTTCTCTTTACACCTTGCTGGTGCTT
CTTCTATTCTAGGGGCTATTAATTTTATTTCTACTGTGGGGAATATACGATCTCCTGGGT
TAGTGGCTGAGCGAATTCCTTTATTTGTTTGAAGAGTTACTGTAACTGCTGTTTTGTTGG
TAGCTGCTTTACCGGTTTTAGCTGGTGCTATTACTATACTTCTTACTGATCGTAATTTGA
ATACATCATTTTTTGACCCTACTGGTGGTGGTGACCCTATTTTGTATATACATTTATTCT
TCGTCTTTTGCCAAATT-TAATAAAAGATAATGCCTGCCCAGTGAATTTAAACGGCCGCG
TTAGCGTGAGCGTGCTAAGGTAGCGTAATAAATAGCCTTTTTATTGAAGGCCAGTGAATG
GCAAGACTAGGAATACCTGTACCAGAAAAAAAACTTTTCCTTTGAGTGAAAAGACTCAAA
TATTCAGGAAGACGAAAAGACCCCGCGGAGCTTTACTCTACCGATCTTAAAAATCACAAA
ATCTTAAAAGTTTGATTGGGGCAATCTTGGAACAACACCAACTTCCAATTATAATAATAA
CTATACAAAACTTAATAAGAACAAAAAAGCAGCTACCCCGGGGATAACAGCGTTATCTAA
CTTGAGAGTACATATCGAAAGCTAGGTTTGCGACCTCGATGTTGGCTTAAGGGTATCCAC
ATTAGTGCAGCCGCTATGAAAGGATAGTCTGTTCGACTATTGCACCCTTATAAGCGGAGG
AAAAGAAACTAACAAGGATTCCCTTAGTAACGGCGAGTGAAGCGGGAAAAGCCCAGCACC
GAATCCCCCAGCCTTGCGCTGTCGGGACCTGTGGTGTATAGGAAGCCTACCTGCCAGCGT
GTTCGGGTACCCAAGTCCTCCTGATCGTGGCCTCTCCCATAGCGGGTGTCAGGCCCGTTG
AGGCACCCGACGGCGCTGGCTCGGAGCTTCCTCGGAGTCGGGTTGTTTGGGATTGCAGCC
CAAAGGGGTGGTAAACTCCATCTAAGGCTAAATACGTTCACGAGTCCGATAGCAAACAAG
TACCGTGAGGGAAAGTTGAAAAGAACTTTGAAGAGAGAGTTCAAGAGTACGTGAAACCGC
TTAGAGGGAAACGGGTGGAACCGCAA-GAGTCGATCCGGGGGATTCAGCCAGTGCACCGC
GGCGGGGCGTGGGTGCGGAGCC-GAGAGCCCGCGCCTGCGCCCAGTCTCCGGGCGGCCTG
GTGCACTTTCCTCGGGGCGATGGTCACGGCCGGCCCTCCGCGGCCAGAAGCCTAGAACCG
GGAAGGTAGCCTGGTCCCGGGGTGTTACAGACCGGCTAG-TTGCCCTGCTCGTCGGAGGG
CTGAGGCTGCCGCTCGCCACCACCCTCGTCAGTCTGGCTCGTCTATAATGGGAAGCACTG
CT-GGTCAGAGC-CTCCCGCCTGCGAGTCC----AGGTCCGGAACGGTGAGGCGAGCTCC
GGGCCCGTGACGAATCGGTCGGCCTTCCACCCGACC
>449_L_whitteni
GAACTTTGTATTTACTGTTGGCTTTGTGGTCTGGGTTAATTGGGTTGGCTTTGAGCCTTT
TGATTCGAGCCGAATTGGGCCAACCTGGTAGATTATTAGGGGATGATCAATTATACAATG
TTATTGTCACGGCTCATGCTTTTATAATAATTTTCTTTTTGGTGATGCCAATAATGATTG
GGGGGTTTGGAAATTGATTAATTCCTTTGATAATTGGGGCTCCTGACATGGCTTTTCCTC
GTCTAAATAATTTAAGGTTTTGGTTACTTGTACCTGCTTTGTTTTTGCTTTTAAGATCTT
CTTTGGTGGAAAGTGGTGTTGGGACTGGTTGAACTGTTTATCCTCCTTTGTCGGGTAACG
TGGCGCATTCTGGAGCTTCTGTAGATTTGGCTATTTTCTCTTTACACCTTGCTGGTGCTT
CTTCTATTTTAGGGGCTATTAATTTTATTTCTACTGTGGGGAATATACGATCTCCTGGGT
TAGTGGCTGAGCGAATTCCTTTATTTGTTTGAAGAGTTACTGTAACTGCTGTTTTGTTGG
TAGCTGCTTTACCGGTTTTAGCTGGTGCTATTACTATACTTCTTACTGATCGTAATTTGA
ATACATCATTTTTTGACCCTACTGGCGGTGGTGACCCTATTTTGTATATACATTTATTCT
TCGTCTTTTGCCAAATT-TAATAAAAGATAATGCCTGCCCAGTGAATTTAAACGGCCGCG
TTAGCGTGAGCGTGCTAAGGTAGCGTAATAAATAGCCTTTTTATTGAAGGCCAGTGAATG
GCAAGACTAGGAATACCTGTACCAGAAAAATAACTTTTCCTTTGAGTGAAAAGACTCAAA
TATTCAGGAAGACGAAAAGACCCCGCGGAGCTTTACTCTACCGATCTTAAAAATCACAAA
ATCTTAAAAGTTTGATTGGGGCAATCTTGGAACAACACCAACTTCCAATTATAATAATAA
CTATACAAAACTTAATAAGAACAAAAAAGCAGCTACCCCGGGGATAACAGCGTTATCTAA
CTTGAGAGTACATATCGAAAGCTAGGTTTGCGACCTCGATGTTGGCTTAAGGGTATCCAC
ATTAGTGCAGCCGCTATGAAAGGATAGTCTGTTCGACTATTGCACCCTTATAAGCGGAGG
AAAAGAAACTAACAAGGATTCCCTTAGTAACGGCGAGTGAAGCGGGAAAAGCCCAGCACC
GAATCCCCCAGCCTTGCGCTGTCGGGACCTGTGGTGTATAGGAAGCCTACCTGCCAGCGT
GTTCGGGTACCCAAGTCCTCCTGATCGTGGCCTCTCCCATAGCGGGTGTCAGGCCCGTTG
AGGCACCCGACGGCGCTGGCTCGGAGCTTCCTCGGAGTCGGGTTGTTTGGGATTGCAGCC
CAAAGGGGTGGTAAACTCCATCTAAGGCTAAATACGTTCACGAGTCCGATAGCAAACAAG
TACCGTGAGGGAAAGTTGAAAAGAACTTTGAAGAGAGAGTTCAAGAGTACGTGAAACCGC
TTAGAGGGAAACGGGTGGAACCGCAA-GAGTCGATCCGGGGGATTCAGCCAGTGCACCGC
GGCGGGGCGTGGGTGCGGAGCC-GAGAGCCCGCGCCTGCGCCCAGTCTCCGGGCGGCCTG
GTGCACTTTCCTCGGGGCGATGGTCACGGCCGGCCCTCCGCGGCCAGAAGCCTAGAACCG
GGAAGGTAGCCTGGTCCCGGGGTGTTACAGACCGGCTAG-TTGCCCTGCTCGTCGGAGGG
CTGAGGCTGCCGCTCGCCACCACCCTCGTCAGTCTGGCTCGTCTATAATGGGAAGCACTG
CT-GGTCAGAGC-CTCCCGCCTGCGAGTCC----AGGTCCGGAACGGTGAGGCGAGCTCC
GGGCCCGTGACGAATCGGTCGGCCTTCCACCCGACC
>368_1_I_andersoniana
GGACTTTATATCTGTTGTTGGCTTTGTGATCTGGGTTAATTGGGTTGGCGTTGAGATTAT
TAATTCGAGCTGAGTTAGGTCAACCTGGGAGGTTGCTGGGGGATGACCAATTGTATAATG
TTATTGTGACAGCTCATGCTTTTATAATAATTTTTTTCTTGGTGATGCCTATGATAATTG
GAGGATTTGGTAATTGGTTAATTCCGTTGATAATTGGGGCTCCTGATATGGCTTTTCCTC
GGTTAAATAATTTAAGATTCTGGTTGCTTGTACCTGCTTTGTTTTTATTATTGAGATCTT
CGTTAGTGGAGAGTGGTGTTGGTACTGGTTGGACAGTTTATCCTCCTTTATCTGGGAACG
TTGCTCATTCAGGGGCTTCTGTTGATTTGGCAATTTTTTCTTTGCATCTTGCTGGTGCTT
CTTCAATTTTGGGTGCTATTAATTTTATTTCTACTGTTGGTAATATGCGTTCTCCAGGGT
TGGTGGCTGAGCGTATTCCTTTGTTTGTATGAAGGGTTACTGTAACAGCTGTTTTATTGG
TTGCAGCTTTGCCTGTTTTAGCTGGTGCTATTACTATGTTACTTACTGATCGTAATTTAA
ATACTTCTTTTTTTGACCCGACTGGTGGTGGTGATCCTATTTTGTACATACATCTTTTTT
TCGTCTTTTGTTAAAACAAAATAAAAGATAATGCCTGCCCAGTGAATTTCAACGGCCGCG
TTAGCGTGAGCGTGCTAAGGTAGCGTAATAAATAGCCTTTTAATTGAAGGCCAGTGAATG
GCAAGACTAGGAATAGCTCTATCAGACCAAAAATTTTTCATTTGAGTGAAAAGACTCAAA
TATTAAGGAAGACGAAAAGACCCCGCGGAGCTTCAC-TAAACAAAACTACAAATTATAAT
TTTTTAAAAGTTTGATTGGGGCAATCTTGGAACAATAATAACTTCCAATTATTAACATAA
CTATATAAAGTTTATTAAGAACAAAAAAGCAGCTACCCCGGGGATAACAGCGTTATCTAA
CTTGAGAGTACATATCGAAAGTTGGGTTTGCGACCTCGATGTTGGCTTAAGGGTATCCAC
ATTAGTGCAGCCGCTATGAAAGGATAGTCTGTTCGACTATTGCACCCTTATAAGCGGAGG
AAAAGAAACTAACAAGGATTCCCTCAGTAACGGCGAGTGAAGCGGGAAGAGCCCAGCACC
GAATCCCACGGCCTCGCGCCGTCGGGACCTGTGGTGTATGGGAAGCCTCCTCGCAGGCGC
GTTCGGGTTCCCAAGTCCTCACGATAGTGGCCTTGCCCATAGCGGGTGTCAGGCCCGTCG
AGGCACCCGACGGCGCCGGCCGGGAGCTTCCCGGGAGTCGGGTTGTTTGGGAATGCAGCC
CAAAGGGGTGGTAAACTCCATCTAAGGCTAAATACGTTCACGAGTCCGATAGCAAACAAG
TACCGTGAGGGAAAGTTGAAAAGAACTTTGAAGAGAGAGTTCAAGAGTACGTGAAACCGC
TTAGAGGCAAACGGGTGGAACCGCAATGCGTCGACCCGGGGGATTCAGTCGG-----CGG
GACGAGCCGGGGCCGCGGAGCACCAGCGCCCGCGCCTCGGCTCGGTCTCCGCCGCGACCG
GTGCACTTTCCCCGGCGGGACGGCCACGACCGGCCCTCCGCGGCCAGAGAGCTATCGCCG
GTAAGGTGCCCCCTCCCCTCGGGTTTACAGACCGGCTAGCCTAG-GAGCTCGCCGGAGGG
CCGAGG-CGCCGCCCGCCGCGGCGCGCGCCATCCCCGCTCGTCA--GCCTGGTCGTACTG
CTCCGTCAGTGGCGT-CCGAAAGCGAGCGCGGGAAGGGCGGGCCGCGCGCGACGGGCTTC
GGGCCGGTGGCGAATCGGTCGGCCTTCCACCCGACC
>259_1_I_andersoniana
GGACTTTATATTTATTGTTGGCTTTGTGATCTGGGTTAATTGGGTTGGCGTTGAGATTAT
TAATTCGAGCTGAGTTAGGTCAACCTGGGAGGTTGCTGGGGGATGACCAATTGTATAATG
TTATTGTGACAGCTCATGCTTTTATAATAATTTTTTTCTTAGTGATGCCTATGATAATTG
GAGGATTTGGTAATTGGTTGATTCCGTTGATAATTGGGGCTCCTGATATGGCTTTTCCTC
GATTAAATAATTTAAGATTCTGGTTGCTTGTACCTGCTTTGTTTTTATTATTGAGATCTT
CGTTAGTGGAGAGTGGTGTTGGTACTGGTTGGACAGTTTACCCTCCTTTATCTGGGAACG
TTGCTCATTCAGGGGCTTCTGTTGATTTGGCAATTTTTTCTTTGCATCTTGCTGGTGCTT
CTTCAATTTTGGGTGCTATTAATTTTATTTCTACTGTTGGTAATATGCGTTCTCCAGGGT
TGGTGGCTGAGCGTATTCCTTTATTTGTGTGAAGGGTTACTGTAACAGCTGTTTTATTGG
TTGCAGCTTTGCCTGTTTTAGCTGGTGCTATTACTATGTTACTTACTGATCGTAATTTAA
ATACTTCTTTTTTTGACCCAACTGGTGGTGGTGATCCTATTTTGTACCTACATCTTTTTT
TCGTCTTTTGTTTAAACAAAATAAAAGATAATGCCTGCCCAGTGAATTTCAACGGCCGCG
TTAGCGTGAGCGTGCTAAGGTAGCGTAATAAATAGCCTTTTAATTGAAGGCCAGTGAATG
GCAAGACTAGGAATAGCTCTATCAGACCAAAAATTTTTCATTTGAGTGAAAAGACTCAAA
TATTAAGGAAGACGAAAAGACCCCGCGGAGCTTTAC-TAAACAAAACTACAAATTATAAT
TTTTTAAAAGTTTGATTGGGGCAATCTTGGAACAATAATAACTTCCAATTATTAACATAA
CTATATAAAGTTTATTAAGAACAAAAAAGCAGCTACCCCGGGGATAACAGCGTTATCTAA
CTTGAGAGTACATATCGAAAGTTGGGTTTGCGACCTCGATGTTGGCTTAAGGGTATCCAC
ATTAGTGCAGCCGCTATGAAAGGATAGTCTGTTCGACTATTGCACCCTTANNNNNNNNNN
NNNNNNNNNNNNNNNNNNNNNNNNNNNNNNNNNNNNNNNNNNNNNNNNNNNNNNNNNNNN
NNNNNNNNNNNNNNNNNNNNNNNNNNNNNNNNNNNNNNNNNNNNNNNNNNNNNNNNNNNN
NNNNNNNNNNNNNNNNNNNNNNNNNNNNNNNNNNNNNNNNNNNNNNNNNNNNNNNNNNNN
NNNNNNNNNNNNNNNNNNNNNNNNNNNNNNNNNNNNNNNNNNNNNNNNNNNNNNNNNNNN
NNNNNNNNNNNNNNNNNNNNNNNNNNNNNNNNNNNNNNNNNNNNNNNNNNNNNNNNNNNN
NNNNNNNNNNNNNNNNNNNNNNNNNNNNNNNNNNNNNNNNNNNNNNNNNNNNGAAACCGC
TTAGAGGCAAACGGGTGGAACCGCAATGCGTCGACCCGGGGGATTCAGTCGG-----CGG
GACGAGCCGGGGCCGCGGAGCACCAGCGCCCGCGCCTCGGCTCGGTCTCCGCTGCGACCG
GTGCACTTTCCCCGGCGGGACGGCCACGACCGGCCCTCCGCGGCCAGAGAGCTATCGCCG
GTAAGGTGCCCCCTCCCCTCGGGTTTACAGACCGGCTAGCCTAG-GAGCTCGCCGGAGGG
CCGAGG-CGCCGCCCGCCGCCGCGCGCGCCATCCCCGCTCGTCA--GCCTGGTCGTAGTG
CTCCGTCAGTGGCGT-CCGAAAGCGAGCGCGGGAAGGTCGGGCCGCGCGCGACGGGCTTC
GGGCCGGTGGCGAATCGGTCGGCCTTCCACCCGACC
>263_1_I_andersoniana
GGACTTTATATTTATTGTTGGCTTTGTGATCTGGGTTAATTGGGTTGGCGTTGAGATTAT
TAATTCGAGCTGAGTTAGGTCAACCTGGGAGGTTGCTGGGGGATGACCAATTGTATAATG
TTATTGTGACAGCTCATGCTTTTATAATAATTTTTTTCTTAGTGATGCCTATGATAATTG
GAGGATTTGGTAATTGGTTGATTCCGTTGATAATTGGGGCTCCTGATATGGCTTTTCCTC
GATTAAATAATTTAAGATTCTGGTTGCTTGTACCTGCTTTGTTTTTATTATTGAGATCTT
CGTTAGTGGAGAGTGGTGTTGGTACTGGTTGGACAGTTTACCCTCCTTTATCTGGGAACG
TTGCTCATTCAGGGGCTTCTGTTGATTTGGCAATTTTTTCTTTGCATCTTGCTGGTGCTT
CTTCAATTTTGGGTGCTATTAATTTTATTTCTACTGTTGGTAATATGCGTTCTCCAGGGT
TGGTGGCTGAGCGTATTCCTTTATTTGTGTGAAGGGTTACTGTAACAGCTGTTTTATTGG
TTGCAGCTTTGCCTGTTTTAGCTGGTGCTATTACTATGTTACTTACTGATCGTAATTTAA
ATACTTCTTTTTTTGACCCAACTGGTGGTGGTGATCCTATTTTGTACATACATCTTTTTT
TCGTCTTTTGTTTAAACAAAATAAAAGATAATGCCTGCCCAGTGAATTTCAACGGCCGCG
TTAGCGTGAGCGTGCTAAGGTAGCGTAATAAATAGCCTTTTAATTGAAGGCCAGTGAATG
GCAAGACTAGGAATAGCTCTATCAGACCAAAAATTTTTCATTTGAGTGAAAAGACTCAAA
TATTAAGGAAGACGAAAAGACCCCGCGGAGCTTTAC-TAAACAAAACTACAAATTATAAT
TTTTTAAAAGTTTGATTGGGGCAATCTTGGAACAATAATAACTTCCAATTATTAACATAA
CTATATAAAGTTTATTAAGAACAAAAAAGCAGCTACCCCGGGGATAACAGCGTTATCTAA
CTTGAGAGTACATATCGAAAGTTGGGTTTGCGACCTCGATGTTGGCTTAAGGGTATCCAC
ATTAGTGCAGCCGCTATGAAAGGATAGTCTGTTCGACTATTGCACCCTTANNNNNNNNNN
NNNNNNNNNNNNNNNNNNNNNNNNNNNNNNNNNNNNNNNNNNNNNNNNNNNNNNNNNNNN
NNNNNNNNNNNNNNNNNNNNNNNNNNNNNNNNNNNNNNNNNNNNNNNNNNNNNNNNNNNN
NNNNNNNNNNNNNNNNNNNNNNNNNNNNNNNNNNNNNNNNNNNNNNNNNNNNNNNNNNNN
NNNNNNNNNNNNNNNNNNNNNNNNNNNNNNNNNNNNNNNNNNNNNNNNNNNNNNNNNNNN
NNNNNNNNNNNNNNNNNNNNNNNNNNNNNNNNNNNNNNNNNNNNNNNNNNNNNNNNNNNN
NNNNNNNNNNNNNNNNNNNNNNNNNNNNNNNNNNNNNNNNNNNNNNNNNNNNGAAACCGC
TTAGAGGCAAACGGGTGGAACCGCAATGCGTCGACCCGGGGGATTCAGTCGG-----CGG
GACGAGCCGGGGCCGCGGAGCACCAGCGCCCGCGCCTCGGCTCGGTCTCCGCTGCGACCG
GTGCACTTTCCCCGGCGGGACGGCCACGACCGGCCCTCCGCGGCCAGAGAGCTATCGCCG
GTAAGGTGCCCCCTCCCCTCGGGTTTACAGACCGGCTAGCCTAG-GAGCTCGCCGGAGGG
CCGAGG-CGCCGCCCGCCGCCGCGCGCGCCATCCCCGCTCGTCA--GCCTGGTCGTAGTG
CTCCGTCAGTGGCGT-CCGAAAGCGAGCGCGGGAAGGTCGGGCCGCGCGCGACGGGCTTC
GGGCCGGTGGCGAATCGGTCGGCCTTCCACCCGACC
>347_1_I_subclathrata
GGACTTTATACTTATTGTTGGCTTTGTGATCTGGGTTAATTGGGTTGGCGTTGAGATTAT
TAATTCGAGCTGAATTAGGTCAACCTGGGAGGTTGTTGGGAGATGACCAATTGTATAATG
TTATTGTGACAGCTCATGCTTTTATAATAATTTTTTTCTTGGTGATGCCTATGATAATTG
GCGGATTCGGTAATTGGTTGATTCCGTTGATAATTGGGGCTCCTGATATGGCTTTTCCTC
GGTTAAATAATTTAAGATTTTGGTTGCTTGTACCTGCTTTGTTTTTATTATTGAGGTCTT
CGTTAGTGGAGAGTGGTGTTGGTACTGGTTGGACAGTTTACCCTCCTTTATCTGGGAACG
TTGCTCATTCAGGGGCTTCTGTTGATTTGGCAATTTTTTCTTTACATCTTGCTGGTGCTT
CCTCAATTTTGGGTGCTATTAATTTTATTTCTACTGTTGGTAATATGCGTTCTCCAGGGT
TGGTGGCTGAGCGTATTCCTTTGTTTGTGTGAAGGGTTACTGTAACAGCTGTTTTATTGG
TTGCAGCTTTGCCTGTTTTAGCTGGTGCTATTACTATATTACTTACTGATCGTAATTTGA
ATACTTCTTTTTTTGACCCAACTGGTGGTGGTGATCCTATTTTGTATATACATCTTTTTT
TCGTCTTTTGTCTAAACAAAATAAAAGATAATGCCTGCCCAGTGAATTTCAACGGCCGCG
TTAGCGTGAGCGTGCTAAGGTAGCGTAATAAATAGCCTTTTAATTGAAGGCCAGTGAATG
GCAAGACTAGGAATAGCTCTATCAGACTAAAAATTTTTCATTTGAGTGAAAAGACTCAAA
TATTAAGAAAGACGAAAAGACCCCGCGGAGCTTCAC-TAAACAAAACTATAAATTATAAT
TTTTCAAAAGTTTGATTGGGGCAATCTTGGAACAATAATAACTTCCAATTATTAACATAA
CTATATAAAGTTTATTAAGAACAAAAAAGCAGCTACCCCGGGGATAACAGCGTTATCTAA
CTTGAGAGTACATATCGAAAGTTGGGTTTGCGACCTCGATGTTGGCTTAAGGGTATCCAC
ATTAGTGCAGCCGCTATGAAAGGATAGTCTGTTCGACTATTGCACCCTTATAAGCGGAGG
AAAAGAAACTAACAAGGATTCCCTCAGTAACGGCGAGTGAAGCGGGAAGAGCCCAGCACC
GAATCCCACGGCCTCGCGCCGTCGGGACCTGTGGTGTATGGGAAGCCTCCTCGCAGGCGT
GTTCGGGTTCCCAAGTCCTCACGATAGTGGCCTTGCCCATAGCGGGTGTCAGGCCCGTCG
AGGCACCCGACGGCGCCGGCCGGGAGCTTCCCGGGAGTCGGGTTGTTTGGGAATGCAGCC
CAAAGGGGTGGTAAACTCCATCTAAGGCTAAATACGTTCACGAGTCCGATAGCAAACAAG
TACCGTGAGGGAAAGTTGAAAAGAACTTTGAAGAGAGAGTTCAAGAGTACGTGAAACCGC
TTAGAGGCAAACGGGTGGAACCGCAATGCGTCGACCCGGGGGATTCAGTCGG-----CGG
GACGAGCCTGGGCCGCGGAGCACCAGCGCCCGCTCCTGGGCTCGGTCTCCGCTGCGACCG
GTGCACTTTCCCCGGCGGGACGGCCACGACCGGCCCTCCGCGGCCAGAGAGCTATCGCCG
GTAAGGTGCCCCCTCCCCTCGGGTTTACAGACCGGCTAGCCTAG-GAGCTCGCCGGAGGG
CCGAGG-CGCCGCCCGCCGCCGCGCGCGCCATCCCCGCTCGTCA--GCCTGGTCGTACTG
CTCCGTCAGTGTCGT-CCGAAAGCGAGCGCGGGAAGGGCGGGCCGCGCGCGACGGGCTTC
GGGCCGGTGGCGAATCGGTCGGCCTTCCACCCGACC
>347_2_I_subclathrata
GGACTTTATACTTATTGTTGGCTTTGTGATCTGGGTTAATTGGGTTGGCGTTGAGATTAT
TAATTCGAGCTGAATTAGGTCAACCTGGGAGGTTGCTGGGAGATGACCAATTGTATAATG
TTATTGTGACAGCTCATGCTTTTATAATAATTTTTTTCTTGGTGATGCCTATGATAATTG
GTGGATTCGGTAATTGGTTGATTCCGTTGATAATTGGGGCTCCTGATATGGCTTTTCCTC
GGTTAAATAATTTAAGATTTTGGTTGCTTGTACCTGCTTTGTTTTTATTATTGAGGTCTT
CGTTAGTGGAGAGTGGTGTTGGTACTGGTTGGACAGTTTACCCTCCTTTATCTGGGAACG
TTGCTCATTCAGGGGCTTCTGTTGATTTGGCAATTTTTTCTTTACATCTTGCTGGTGCTT
CCTCAATTTTGGGTGCTATTAATTTTATTTCTACTGTTGGTAATATGCGTTCTCCAGGGT
TGGTGGCTGAGCGTATTCCTTTGTTTGTGTGAAGGGTTACTGTAACAGCTGTTTTATTGG
TTGCAGCTTTGCCTGTTTTAGCTGGTGCTATTACTATGTTACTTACTGATCGTAATTTGA
ATACTTCTTTTTTTGACCCAACTGGTGGTGGTGATCCTATTTTGTATATACATCTTTTTT
NNNNNNNNNNNNNNNNNNNNNNNNNNNNNNNNNNNNNNNNNNNNNNNNNNNNNNNNNNNN
NNNNNNNNNNNNNNNNNNNNNNNNNNNNNNNNNNNNNNNNNNNNNNNNNNNNNNNNNNNN
NNNNNNNNNNNNNNNNNNNNNNNNNNNNNNNNNNNNNNNNNNNNNNNNNNNNNNNNNNNN
NNNNNNNNNNNNNNNNNNNNNNNNNNNNNNNNNNNNNNNNNNNNNNNNNNNNNNNNNNNN
NNNNNNNNNNNNNNNNNNNNNNNNNNNNNNNNNNNNNNNNNNNNNNNNNNNNNNNNNNNN
NNNNNNNNNNNNNNNNNNNNNNNNNNNNNNNNNNNNNNNNNNNNNNNNNNNNNNNNNNNN
NNNNNNNNNNNNNNNNNNNNNNNNNNNNNNNNNNNNNNNNNNNNNNNNNNNNNNNNNNNN
NNNNNNNNNNNNNNNNNNNNNNNNNNNNNNNNNNNNNNNNNNNNNNNNNNTAAGCGGAGG
AAAAGAAACTAACAAGGATTCCCTCAGTAACGGCGAGTGAAGCGGGAAGAGCCCAGCACC
GAATCCCACGGCCTCGCGCCGTCGGGACCTGTGGTGTATGGGAAGCCTCCTCGCAGGCGT
GTTCGGGTTCCCAAGTCCTCACGATAGTGGCCTTGCCCATAGCGGGTGTCAGGCCCGTCG
AGGCACCCGACGGCGCCGGCCGGGAGCTTCCCGGGAGTCGGGTTGTTTGGGAATGCAGCC
CAAAGGGGTGGTAAACTCCATCTAAGGCTAAATACGTTCACGAGTCCGATAGCAAACAAG
TACCGTGAGGGAAAGTTGAAAAGAACTTTGAAGAGAGAGTTCAAGAGTACGTGAAACCGC
TTAGAGGCAAACGGGTGGAACCGCAATGCGTCGACCCGGGGGATTCAGTCGG-----CGG
GACGAGCCTGGGCCGCGGAGCACCAGCGCCCGCTCCTGGGCTCGGTCTCCGCTGCGACCG
GTGCACTTTCCCCGGCGGGACGGCCACGACCGGCCCTCCGCGGCCAGAGAGCTATCGCCG
GTAAGGTGCCCCCTCCCCTCGGGTTTACAGACCGGCTAGCCTAG-GAGCTCGCCGGAGGG
CCGAGG-CGCCGCCCGCCGCCGCGCGCGCCATCCCCGCTCGTCA--GCCTGGTCGTACTG
CTCCGTCAGTGTCGT-CCGAAAGCGAGCGCGGGAAGGGCGGGCCGCGCGCGACGGGCTTC
GGGCCGGTGGCGAATCGGTCGGCCTTCCACCCGACC
>667_1_I_subclathrata
GGACTTTATACTTATTGTTGGCTTTGTGATCTGGGTTAATTGGGTTGGCGTTGAGATTAT
TAATTCGAGCTGAATTAGGTCAACCTGGGAGGTTGTTGGGAGATGACCAATTGTATAATG
TTATTGTGACAGCTCATGCTTTTATAATAATTTTTTTCTTGGTGATGCCTATGATAATTG
GTGGATTCGGTAATTGGTTGATTCCGTTGATAATTGGGGCTCCTGATATGGCTTTTCCTC
GGTTAAATAATTTAAGATTTTGGTTGCTTGTACCTGCTTTGTTTTTATTATTGAGGTCTT
CGTTAGTGGAGAGTGGTGTTGGTACTGGTTGGACAGTTTACCCTCCTTTATCTGGGAACG
TTGCTCATTCAGGGGCTTCTGTTGATTTGGCAATTTTTTCTTTGCATCTTGCTGGTGCTT
CCTCAATTTTGGGTGCTATTAATTTTATTTCTACTGTTGGTAATATGCGTTCTCCAGGGT
TGGTGGCTGAGCGTATTCCTTTGTTTGTGTGAAGGGTTACTGTAACAGCTGTTTTATTGG
TTGCAGCTTTGCCTGTTTTAGCTGGTGCTATTACTATGTTACTTACTGATCGTAATTTGA
ATACTTCTTTTTTTGACCCAACTGGTGGTGGTGATCCTATTTTGTATATACATCTTTTTT
NNNNNNNNNNNNNNNNNNNNNNNNNNNNNNNNNNNNNNNNNNNNNNNNNNNNNNNNNNNN
NNNNNNNNNNNNNNNNNNNNNNNNNNNNNNNNNNNNNNNNNNNNNNNNNNNNNNNNNNNN
NNNNNNNNNNNNNNNNNNNNNNNNNNNNNNNNNNNNNNNNNNNNNNNNNNNNNNNNNNNN
NNNNNNNNNNNNNNNNNNNNNNNNNNNNNNNNNNNNNNNNNNNNNNNNNNNNNNNNNNNN
NNNNNNNNNNNNNNNNNNNNNNNNNNNNNNNNNNNNNNNNNNNNNNNNNNNNNNNNNNNN
NNNNNNNNNNNNNNNNNNNNNNNNNNNNNNNNNNNNNNNNNNNNNNNNNNNNNNNNNNNN
NNNNNNNNNNNNNNNNNNNNNNNNNNNNNNNNNNNNNNNNNNNNNNNNNNNNNNNNNNNN
NNNNNNNNNNNNNNNNNNNNNNNNNNNNNNNNNNNNNNNNNNNNNNNNNNNNNNNNNNNN
NNNNNNNNNNNNNNNNNNNNNNNNNNNNNNNNNNNNNNNNNNNNNNNNNNNNNNNNNNNN
NNNNNNNNNNNNNNNNNNNNNNNNNNNNNNNNNNNNNNNNNNNNNNNNNNNNNNNNNNNN
NNNNNNNNNNNNNNNNNNNNNNNNNNNNNNNNNNNNNNNNNNNNNNNNNNNNNNNNNNNN
NNNNNNNNNNNNNNNNNNNNNNNNNNNNNNNNNNNNNNNNNNNNNNNNNNNNNNNNNNNN
NNNNNNNNNNNNNNNNNNNNNNNNNNNNNNNNNNNNNNNNNNNNNNNNNNNNNNNNNNNN
NNNNNNNNNNNNNNNNNNNNNNNNNNNNNNNNNNNNNNNNNNNNNNNNNNNNNNNNNNNN
NNNNNNNNNNNNNNNNNNNNNNNNNNNNNNNNNNNNNNNNNNNNNNNNNNNNNNNNNNNN
NNNNNNNNNNNNNNNNNNNNNNNNNNNNNNNNNNNNNNNNNNNNNNNNNNNNNNNNNNNN
NNNNNNNNNNNNNNNNNNNNNNNNNNNNNNNNNNNNNNNNNNNNNNNNNNNNNNNNNNNN
NNNNNNNNNNNNNNNNNNNNNNNNNNNNNNNNNNNNNNNNNNNNNNNNNNNNNNNNNNNN
NNNNNNNNNNNNNNNNNNNNNNNNNNNNNNNNNNNNNNNNNNNNNNNNNNNNNNNNNNNN
NNNNNNNNNNNNNNNNNNNNNNNNNNNNNNNNNNNNNNNNNNNNNNNNNNNNNNNNNNNN
NNNNNNNNNNNNNNNNNNNNNNNNNNNNNNNNNNNN
>248_1_R_mouhotii
GAACTTTGTATTTGCTGTTAGCTTTGTGATCTGGTTTAATTGGGTTGGCTCTTAGGTTGT
TAATTCGAGCTGAGTTAGGCCAACCGGGGAGATTGTTAGGAGATGATCAATTATATAATG
TGATTGTAACCGCTCATGCTTTTATAATAATTTTTTTCTTAGTTATACCAATGATGATTG
GTGGATTTGGTAATTGGTTAATCCCTTTAATGATTGGGGCTCCTGATATGGCTTTTCCTC
GATTAAATAACTTAAGGTTTTGGTTACTTGTGCCTGCTTTGTTTTTGTTATTAAGATCTT
CGTTGGTGGAAAGTGGTGTAGGAACTGGTTGGACCGTTTATCCACCTTTGTCTGGTAATG
TGGCACATTCAGGGGCTTCTGTTGATCTGGCTATTTTTTCATTGCATCTTGCTGGTGCTT
CCTCAATTTTGGGGGCTATTAATTTTATTTCTACTGTGGGTAATATACGTTCGCCTGGGT
TGGTGGCTGAGCGAATTCCTTTGTTTGTGTGAAGAGTTACTGTGACGGCTGTTTTATTGG
TGGCAGCTTTACCTGTTTTAGCTGGTGCTATTACTATGCTTCTTACTGATCGTAATTTAA
ATACGTCGTTTTTTGATCCTACTGGAGGTGGTGATCCTATTTTATATATGCATTTGTTTT
TCGTCTTTTGTTAATTCAAAATAAAAGATAATGCCTGCCCAGTGAATTTTAACGGCCGCG
TTAGCGTGAGCGTGCTAAGGTAGCGTAATAAATAGCCTTTTAATTGAAGGCCAGTGAATG
GCAAGACTAGGAATTCCTCTACCAGAAAAAAAACTTTTCATTTGAGTGAAAAGACTCAAA
TACTAAGGAAGACGAAAAGACCCCGCGGAGCTTAACTTAACAAATTTTAAAACAATAAAC
TTTT-TAAAGTTTGATTGGGGCAATCTTGGAACAATAATAACTTCCAATTTTTAAGAAAA
ACATACAAAGCTTACTAAGAACTAAAAAGCAGCTACCCCGGGGATAACAGCGTTATCCAG
CTTAAGAGTACATATCGAAAGCTGGGTTTGCGACCTCGATGTTGGCTTAAGGGTATCCAC
ATAAGTGCAGCCGCTATGAAAGGATAGTCTGTTCGACTATTGCACCCTTATAAGCGGAGG
AAAAGAAACTAACAAGGATTCCCTCAGTAACGGCGAGTGAAGAGGGAAAAGCCCAGCACC
GAATCCCACAGCCTTGCGCTGTCGGGAACTGTGGTGTATAGGAAGCCTTCTTGCCAGCGT
GTTCGGGTTCCCAAGTCCTCCTGATCGTGGCCTTGCCCATAGCGGGTGTCAGGCCCGTCG
AGGCACCCGACGGCGCTGGCTTGGAGCTTCCTCGGAGTCGGGTTGTTTGGGAATGCAGCC
CAAAGGGGTGGTAAACTCCATCTAAGGCTAAATACGTTCACGAGTCCGATAGCAAACAAG
TACCGTGAGGGAAAGTTGAAAAGAACTTTGAAGAGAGAGTTCAAGAGTACGTGAAACCGC
TTAGAGGCAAACGGGTGGAACCGCAATGCGTCGACCCGGGGGATTCAGCCAGTAAATCGG
GACGGGCTTAGGCCGCGGAGCCGAAAAGCCCGCGCCTTTGCTTGGTCTCCGGGCGGACTG
GTGCACTTTCCTCGGGTTGATGGCCACGACCGGCTCTCTGCGGCCAGAAAGCTACGACCG
GGAAGGTGACCCACAGCCACGGTGTTATAGCCCGGCTAGCCTGA-ACGCTCGTCGGAGGG
CCGAGG-CGCCGCACGTCGCTACCCGCGCCATCCTTGCTCGTCACA--TGGGTTGGACTG
CTCCGTCAGTGCTAT-CCGACAGCGAGCGTAGGAAGGGCCGGCACGGTGCGACGGGCATC
GGGCCAGTGGCGAATCGGTCGGTCTTCCACCCGACC
>248_4_R_mouhotii
GAACTTTGTATTTGCTGTTAGCTTTGTGATCTGGTTTAATTGGGTTGGCTCTTAGGTTGT
TAATTCGAGCTGAGTTAGGCCAACCGGGGAGATTGTTAGGAGATGATCAATTATATAATG
TGATTGTAACCGCTCATGCTTTTATAATAATTTTTTTCTTAGTTATACCAATGATGATTG
GTGGATTTGGTAATTGGTTAATCCCTTTAATGATTGGGGCTCCTGATATGGCTTTTCCTC
GATTAAATAACTTAAGGTTTTGGTTACTTGTACCTGCTTTGTTTTTGTTATTAAGATCTT
CGTTGGTGGAAAGTGGTGTAGGAACTGGTTGGACCGTTTATCCACCTTTGTCTGGTAATG
TGGCACATTCAGGGGCTTCTGTTGATCTGGCTATTTTTTCATTGCATCTTGCTGGTGCTT
CATCAATTTTGGGGGCTATTAATTTTATTTCTACTGTGGGTAATATACGTTCGCCTGGGT
TGGTGGCTGAGCGAATTCCTTTGTTTGTGTGAAGAGTTACTGTGACGGCTGTTTTATTGG
TGGCAGCTTTACCTGTTTTAGCTGGTGCTATTACTATGCTTCTTACTGATCGTAATTTAA
ATACGTCGTTTTTTGATCCTACTGGAGGTGGTGATCCTATTTTATATATGCATTTGTTTT
TCGTCTTTTGTTAATTCAAAATAAAAGATAATGCCTGCCCAGTGAATTTTAACGGCCGCG
TTAGCGTGAGCGTGCTAAGGTAGCGTAATAAATAGCCTTTTAATTGAAGGCCAGTGAATG
GCAAGACTAGGAATTCCTCTACCAGAAAAAAAACTTTTCATTTGAGTGAAAAGACTCAAA
TACTAAGGAAGACGAAAAGACCCCGCGGAGCTTAACTTAACAAATTTTAAAACAATAAAC
TTTT-TAAAGTTTGATTGGGGCAATCTTGGAACAATAATAACTTCCAATTTTTAAGAAAA
ACATACAAAGCTTACTAAGAACTAAAAAGCAGCTACCCCGGGGATAACAGCGTTATCCAG
CTTAAGAGTACATATCGAAAGCTGGGTTTGCGACCTCGATGTTGGCTTAAGGGTATCCAC
ATAAGTGCAGCCGCTATGAAAGGATAGTCTGTTCGACTATTGCACCCTTATAAGCGGAGG
AAAAGAAACTAACAAGGATTCCCTCAGTAACGGCGAGTGAAGAGGGAAAAGCCCAGCACC
GAATCCCACAGCCTTGCGCTGTCGGGAACTGTGGTGTATAGGAAGCCTTCTTGCCAGCGT
GTTCGGGTTCCCAAGTCCTCCTGATCGTGGCCTTGCCCATAGCGGGTGTCAGGCCCGTCG
AGGCACCCGACGGCGCTGGCTTGGAGCTTCCTCGGAGTCGGGTTGTTTGGGAATGCAGCC
CAAAGGGGTGGTAAACTCCATCTAAGGCTAAATACGTTCACGAGTCCGATAGCAAACAAG
TACCGTGAGGGAAAGTTGAAAAGAACTTTGAAGAGAGAGTTCAAGAGTACGTGAAACCGC
TTAGAGGCAAACGGGTGGAACCGCAATGCGTCGACCCGGGGGATTCAGCCAGTAAATCGG
GACGGGCTTAGGCCGCGGAGCCGAAAAGCCCGCGCCTTTGCTTGGTCTCCGGGCGGACTG
GTGCACTTTCCTCGGGTTGATGGCCACGACCGGCTCTCTGCGGCCAGAAAGCTACGACCG
GGAAGGTGACCCACAGCCACGGTGTTATAGCCCGGCTAGCCTGA-ACGCTCGTCGGAGGG
CCGAGG-CGCCGCACGTCGCTACCCGCGCCATCCTTGCTCGTCACA--TGGGTTGGACTG
CTCCGTCAGTGCTAT-CCGACAGCGAGCGTAGGAAGGGCCGGCACGGTGCGACGGGCATC
GGGCCAGTGGCGAATCGGTCGGTCTTCCACCCGACC
>253_1_R_mouhotii
GAACTTTGTATTTGCTGTTAGCTTTGTGATCTGGTTTAATTGGGTTGGCTCTTAGGTTGT
TAATTCGAGCTGAGTTAGGCCAACCGGGGAGATTGTTAGGAGATGATCAATTATATAATG
TGATTGTAACCGCTCATGCTTTTATAATAATTTTTTTCTTAGTTATACCAATGATGATTG
GTGGATTTGGTAATTGGTTAATCCCTTTAATGATTGGGGCTCCTGATATGGCTTTTCCTC
GATTAAATAACTTAAGGTTTTGGTTACTTGTGCCTGCTTTGTTTTTGTTATTAAGATCTT
CGTTGGTGGAAAGTGGTGTAGGAACTGGTTGGACCGTTTATCCACCTTTGTCTGGTAATG
TGGCACATTCAGGGGCTTCTGTTGATTTGGCTATTTTTTCATTGCATCTTGCTGGTGCTT
CCTCAATTTTGGGGGCTATTAATTTTATTTCTACTGTGGGTAATATACGTTCGCCTGGGT
TGGTGGCTGAGCGAATTCCTTTGTTTGTGTGAAGAGTTACTGTGACGGCTGTTTTATTGG
TGGCAGCTTTACCTGTTTTAGCTGGTGCTATTACTATGCTTCTTACTGATCGTAATTTAA
ATACGTCATTTTTTGATCCTACTGGAGGTGGTGATCCTATTTTATATATGCATTTGTTTT
TCGTCTTTTGTTAATTCAAAATAAAAGATAATGCCTGCCCAGTGAATTTTAACGGCCGCG
TTAGCGTGAGCGTGCTAAGGTAGCGTAATAAATAGCCTTTTAATTGAAGGCCAGTGAATG
GCAAGACTAGGAATTCCTCTACCAGAAAAAAAACTTTTCATTTGAGTGAAAAGACTCAAA
TACTAAGGAAGACGAAAAGACCCCGCGGAGCTTAACTTAACAAATTTTAAAACAATAAAC
TTTT-TAAAGTTTGATTGGGGCAATCTTGGAACAATAATAACTTCCAATTTTTAAGAAAA
ATATACAAAGCTTACTAAGAACTAAAAAGCAGCTACCCCGGGGATAACAGCGTTATCCAG
CTTAAGAGTACATATCGAAAGCTGGGTTTGCGACCTCGATGTTGGCTTAAGGGTATCCAC
ATAAGTGCAGCCGCTATGAAAGGATAGTCTGTTCGACTATTGCACCCTTATAAGCGGAGG
AAAAGAAACTAACAAGGATTCCCTCAGTAACGGCGAGTGAAGAGGGAAAAGCCCAGCACC
GAATCCCACAGCCTTGCGCTGTCGGGAACTGTGGTGTATAGGAAGCCTTCTTGCCAGCGT
GTTCGGGTTCCCAAGTCCTCCTGATCGTGGCCTTGCCCATAGCGGGTGTCAGGCCCGTCG
AGGCACCCGACGGCGCTGGCTTGGAGCTTCCTCGGAGTCGGGTTGTTTGGGAATGCAGCC
CAAAGGGGTGGTAAACTCCATCTAAGGCTAAATACGTTCACGAGTCCGATAGCAAACAAG
TACCGTGAGGGAAAGTTGAAAAGAACTTTGAAGAGAGAGTTCAAGAGTACGTGAAACCGC
TTAGAGGCAAACGGGTGGAACCGCAATGCGTCGACCCGGGGGATTCAGCCAGTAAATCGG
GACGGGCTTAGGCCGCGGAGCCGAAAAGCCCGCGCCTTTGCTTGGTCTCCGGGCGGACTG
GTGCACTTTCCTCGGGTTGATGGCCACGACCGGCTCTCTGCGGCCAGAAAGCTACGACCG
GGAAGGTGACCCACAGCCACGGTGTTATAGCCCGGCTAGCCTGA-ACGCTCGTCGGAGGG
CCGAGG-CGCCGCRCGTCGCTACCCGCGCCATCCTTGCTCGTCACA--TGGGTTGGACTG
CTCCGTCAGTGCTAT-CCGACAGCGAGCGTAGGAAGGGCCGGCACGGTGCGACGGGCATC
GGGCCAGTGGCGAATCGGTCGGTCTTCCACCCGACC
>260_5_R_chaudhurii
GAACTTTGTATTTGCTGTTAGCTTTGTGGTCTGGGTTAATTGGGTTGGCTCTTAGGTTGT
TAATTCGAGCTGAGTTAGGTCAACCGGGGAGATTATTAGGAGATGACCAACTATATAATG
TGATTGTAACCGCTCATGCTTTTATGATAATTTTTTTCTTAGTTATACCAATGATGATTG
GTGGATTTGGTAATTGGTTAATTCCATTAATGATTGGGGCCCCTGATATAGCTTTTCCTC
GATTAAATAATTTAAGGTTTTGGTTACTTGTGCCTGCTTTGTTTTTGTTACTAAGATCTT
CATTGGTGGAAAGTGGTGTTGGAACTGGTTGGACTGTTTATCCCCCTTTGTCTGGTAATG
TGGCACATTCAGGGGCTTCTGTTGATTTGGCTATTTTTTCGTTGCATCTTGCTGGTGCTT
CTTCAATTTTAGGGGCTATTAATTTTATTTCTACTGTGGGTAATATACGTTCGCCTGGGT
TGGTGGCTGAGCGAATTCCTTTGTTTGTGTGAAGAGTTACTGTGACGGCTGTTTTATTGG
TGGCAGCTTTACCTGTTTTAGCTGGTGCTATTACTATGCTTCTTACTGATCGTAACTTGA
ACACGTCGTTTTTTGACCCTACTGGTGGTGGTGATCCTATTTTGTATATACACTTGTTTT
TCGTCTTTTGTTAATTCAAAATAAAAGATAATGCCTGCCCAGTGAATTTTAACGGCCGCG
TTAGCGTGAGCGTGCTAAGGTAGCGTAATAAATAGCCTTTTAATTGAAGGCCAGTGAATG
GCAAGACTAGGAATACCTCTACCAGAAAAAAAACTTTTCATTTGAGTGAAAAGACTCAAA
TACTAAGGAAGACGAAAAGACCCCGCGGAGCTTAACTTAACAAAT-TTAAAA-CAACAAA
ATTTTTAAAGTTTGATTGGGGCAATCTTGGAACAATAATAACTTCCAATCTTTAAGAAAA
ACATACAAAGCTTACTAAGAACTAAAAAGCAGCTACCCCGGGGATAACAGCGTTATCCAG
CTTAAGAGTACATATCGAAAGCTGGGTTTGCGACCTCGATGTTGGCTTAAGGGTATCCAC
ATAAGTGCAGCCGCTATGAAAGGATAGTCTGTTCGACTATTGCACCCTTATAAGCGGAGG
AAAAGAAACTAACAAGGATTCCCTCAGTAACGGCGAGTGAAGAGGGAAAAGCCCAGCACC
GAATCCCACAGCCTTGCGCTGTCGGGAACTGTGGTGTATAGGAAGCCTTCTTGCCAGCGT
GTTCGGGTTCCCAAGTCCTCCTGATCGTGGCCTTGCCCATAGCGGGTGTCAGGCCCGTCG
AGGCACCCGACGGCGCTGGCTTGGAGCTTCCTCGGAGTCGGGTTGTTTGGGAATGCAGCC
CAAAGGGGTGGTAAACTCCATCTAAGGCTAAATACGTTCACGAGTCCGATAGCAAACAAG
TACCGTGAGGGAAAGTTGAAAAGAACTTTGAAGAGAGAGTTCAAGAGTACGTGAAACCGC
TTAGAGGCAAACGGGTGGAACCGCAATGCGTCGACCCGGGGGATTCAGCCAGTAAATCGG
GACGGGCTTAGGCCGCGGAGCCGAAAAGCCCGCGCCTTTGCTTGGTCTCCGGGCGGACTG
GTGCACTTTCCTCGGGTTGATGGCCACGACCGGCTCTCTGCGGCCAGAAAGCTASGACCG
GGAAGGTGACCCACAGCCACGGTGTTATAGCCCGGCTAGCCTGA-ACGCTCGTCGGAGGG
CCGAGG-CGCCGCACGTCGCTACCCGCGCCATCCTTGCTCGTCACA--TGGGTTGGACTG
CTCCGTCAGTGCTAT-CCGACAGCGAGCGTAGGAAGGGCCGGCACGGTGCGACGGGCATC
GGGCCAGTGGCGAATCGGTCGGTCTTCCACCCGACC
>260_9_R_chaudhurii
GAACTTTGTATTTGCTGTTAGCTTTGTGGTCTGGGTTAATTGGGTTGGCTCTTAGGTTGT
TAATTCGAGCTGAGTTAGGTCAACCGGGGAGATTATTAGGAGATGACCAACTATATAATG
TGATTGTAACCGCTCATGCTTTTATGATAATTTTTTTCTTAGTTATACCAATGATGATTG
GTGGATTTGGTAATTGGTTAATTCCATTAATGATTGGGGCCCCTGATATAGCTTTTCCTC
GATTAAATAATTTAAGGTTTTGGTTACTTGTGCCTGCTTTGTTTTTGTTACTAAGATCTT
CATTGGTGGAAAGTGGTGTTGGAACTGGTTGGACTGTTTATCCCCCTTTGTCTGGTAATG
TGGCACATTCAGGGGCTTCTGTTGATTTGGCTATTTTTTCGTTGCATCTTGCTGGTGCTT
CTTCAATTTTAGGGGCTATTAATTTTATTTCTACTGTGGGTAATATACGTTCGCCTGGGT
TGGTGGCTGAGCGAATTCCTTTGTTTGTGTGAAGAGTTACTGTGACGGCTGTTTTGTTGG
TGGCAGCTTTACCTGTTTTAGCTGGTGCTATTACTATGCTTCTTACTGATCGTAACTTGA
ACACGTCGTTTTTTGACCCTACTGGTGGTGGTGATCCTATTTTGTATATACACTTGTTTT
TCGTCTTTTGTTAATTCAAAATAAAAGATAATGCCTGCCCAGTGAATTTTAACGGCCGCG
TTAGCGTGAGCGTGCTAAGGTAGCGTAATAAATAGCCTTTTAATTGAAGGCCAGTGAATG
GCAAGACTAGGAATACCTCTACCAGAAAAAAAACTTTTCATTTGAGTGAAAAGACTCAAA
TACTAAGGAAGACGAAAAGACCCCGCGGAGCTTAACTTAACAAAT-TTAAAA-CAACAAA
ATTTTTAAAGTTTGATTGGGGCAATCTTGGAACAATAATAACTTCCAATCTTTAAGAAAA
ACATACAAAGCTTACTAAGAACTAAAAAGCAGCTACCCCGGGGATAACAGCGTTATCCAG
CTTAAGAGTACATATCGAAAGCTGGGTTTGCGACCTCGATGTTGGCTTAAGGGTATCCAC
ATAAGTGCAGCCGCTATGAAAGGATAGTCTGTTCGACTATTGCACCCTTATAAGCGGAGG
AAAAGAAACTAACAAGGATTCCCTCAGTAACGGCGAGTGAAGAGGGAAAAGCCCAGCACC
GAATCCCACAGCCTTGCGCTGTCGGGAACTGTGGTGTATAGGAAGCCTTCTTGCCAGCGT
GTTCGGGTTCCCAAGTCCTCCTGATCGTGGCCTTGCCCATAGCGGGTGTCAGGCCCGTCG
AGGCACCCGACGGCGCTGGCTTGGAGCTTCCTCGGAGTCGGGTTGTTTGGGAATGCAGCC
CAAAGGGGTGGTAAACTCCATCTAAGGCTAAATACGTTCACGAGTCCGATAGCAAACAAG
TACCGTGAGGGAAAGTTGAAAAGAACTTTGAAGAGAGAGTTCAAGAGTACGTGAAACCGC
TTAGAGGCAAACGGGTGGAACCGCAATGCGTCGACCCGGGGGATTCAGCCAGTAAATCGG
GACGGGCTTAGGCCGCGGAGCCGAAAAGCCCGCGCCTTTGCTTGGTCTCCGGGCGGACTG
GTGCACTTTCCTCGGGTTGATGGCCACGACCGGCTCTCTGCGGCCAGAAAGCTAGGACCG
GGAAGGTGACCCACAGCCACGGTGTTATAGCCCGGCTAGCCTGA-ACGCTCGTCGGAGGG
CCGAGG-CGCCGCACGTCGCTACCCGCGCCATCCTTGCTCGTCACA--TGGGTTGGACTG
CTCCGTCAGTGCTAT-CCGACAGCGAGCGTAGGAAGGGCCGGCACGGTGCGACGGGCATC
GGGCCAGTGGCGAATCGGTCGGTCTTCCACCCGACC
>421_3_R_chaudhurii
GAACTTTGTATTTGCTGTTAGCTTTGTGGTCTGGGTTAATTGGGTTGGCTCTTAGGTTGT
TAATTCGAGCTGAGTTAGGTCAACCGGGGAGATTATTAGGAGATGACCAACTATATAATG
TGATTGTAACCGCTCATGCTTTTATGATAATTTTTTTCTTAGTTATACCAATGATGATTG
GTGGATTTGGTAATTGGTTAATTCCATTAATGATTGGGGCCCCTGATATAGCTTTTCCTC
GATTAAATAATTTAAGGTTTTGGTTACTTGTGCCTGCTTTGTTTTTGTTACTAAGATCTT
CATTGGTGGAAAGTGGTGTTGGAACTGGTTGGACTGTTTATCCCCCTTTGTCTGGTAATG
TGGCACATTCAGGGGCTTCTGTTGATTTGGCTATTTTTTCGTTGCATCTTGCTGGTGCTT
CTTCAATTTTAGGGGCTATTAATTTTATTTCTACTGTGGGTAATATACGTTCGCCTGGGT
TGGTGGCTGAGCGAATTCCTTTGTTTGTGTGAAGAGTTACTGTGACGGCTGTTTTATTGG
TGGCAGCTTTACCTGTTTTAGCTGGTGCTATTACTATGCTTCTTACTGATCGTAACTTGA
ACACGTCGTTTTTTGACCCTACTGGTGGTGGTGATCCTATTTTGTATATACACTTGTTTT
TCGTCTTTTGTTAATTCAAAATAAAAGATAATGCCTGCCCAGTGAATTTTAACGGCCGCG
TTAGCGTGAGCGTGCTAAGGTAGCGTAATAAATAGCCTTTTAATTGAAGGCCAGTGAATG
GCAAGACTAGGAATACCTCTACCAGAAAAAAAACTTTTCATTTGAGTGAAAAGACTCAAA
TACTAAGGAAGACGAAAAGACCCCGCGGAGCTTAACTTAACAAAT-TTAAAA-CAACAAA
ATTTTTAAAGTTTGATTGGGGCAATCTTGGAACAATAATAACTTCCAATCTTTAAGAAAA
ACATACAAAGCTTACTAAGAACTAAAAAGCAGCTACCCCGGGGATAACAGCGTTATCCAG
CTTAAGAGTACATATCGAAAGCTGGGTTTGCGACCTCGATGTTGGCTTAAGGGTATCCAC
ATAAGTGCAGCCGCTATGAAAGGATAGTCTGTTCGACTATTGCACCCTTATAAGCGGAGG
AAAAGAAACTAACAAGGATTCCCTCAGTAACGGCGAGTGAAGAGGGAAAAGCCCAGCACC
GAATCCCACAGCCTTGCGCTGTCGGGAACTGTGGTGTATAGGAAGCCTTCTTGCCAGCGT
GTTCGGGTTCCCAAGTCCTCCTGATCGTGGCCTTGCCCATAGCGGGTGTCAGGCCCGTCG
AGGCACCCGACGGCGCTGGCTTGGAGCTTCCTCGGAGTCGGGTTGTTTGGGAATGCAGCC
CAAAGGGGTGGTAAACTCCATCTAAGGCTAAATACGTTCACGAGTCCGATAGCAAACAAG
TACCGTGAGGGAAAGTTGAAAAGAACTTTGAAGAGAGAGTTCAAGAGTACGTGAAACCGC
TTAGAGGCAAACGGGTGGAACCGCAATGCGTCGACCCGGGGGATTCAGCCAGTAAATCGG
GACGGGCTTAGGCCGCGGAGCCGAAAAGCCCGCGCCTTTGCTTGGTCTCCGGGCGGACTG
GTGCACTTTCCTCGGGTTGATGGCCACGACCGGCTCTCTGCGGCCAGAAAGCTACGACCG
GGAAGGTGACCCACAGCCACGGTGTTATAGCCCGGCTAGCCTGA-ATGCTCGTCGGAGGG
CCGAGG-CGCCGCACGTCGCTACCCGCGCCATCCTTGCTCGTCACA--TGGGTTGGACTG
CTCCGTCAGTGCTAT-CCGACAGCGAGCGTAGGAAGGGCCGGCACGGTGCGACGGGCATC
GGGCCAGTGGCGAATCGGTCGGTCTTCCACCCGACC
>927_1_R_myitkyinae
GAACTTTGTATTTACTATTAGCTTTGTGGTCTGGGTTAATTGGGTTGGCTCTTAGGTTGT
TAATTCGAGCTGAGTTAGGTCAACCGGGGAGATTATTAGGGGATGACCAATTATATAATG
TGATTGTAACCGCTCATGCTTTTATAATAATTTTTTTCTTGGTTATACCAATGATAATTG
GTGGATTTGGTAATTGGTTGATTCCATTAATGATTGGGGCCCCTGATATAGCTTTTCCTC
GGTTAAATAATTTAAGGTTTTGGTTACTTGTGCCTGCTTTGTTTTTGTTATTAAGATCTT
CGTTGGTGGAAAGCGGTGTTGGAACTGGTTGGACTGTTTATCCCCCTTTATCTGGTAATG
TGGCACATTCAGGGGCTTCTGTTGATTTGGCTATTTTTTCATTACATCTTGCTGGTGCTT
CATCAATTTTAGGGGCTATTAATTTTATTTCTACTGTGGGTAATATACGTTCGCCTGGGT
TGGTGGCTGAGCGAATTCCTTTGTTTGTGTGAAGAGTTACTGTGACGGCTGTTTTATTGG
TGGCAGCTTTACCTGTTTTAGCTGGTGCTATTACTATGCTTCTTACTGATCGTAACTTAA
ACACGTCATTTTTTGACCCTACTGGTGGTGGTGATCCTATTTTATATATGCATTTGTTTT
TCGTCTTTTGTTAATTCAAAATAAAAGATAATGCCTGCCCAGTGAATTTTAACGGCCGCG
TTAGCGTGAGCGTGCTAAGGTAGCGTAATAAATAGCCTTTTAATTGAAGGCCAGTGAATG
GCAAGACTAGGAATATCTCTACCAGAAAAAAAACTTTTCATTTGAGTGAAAAGACTCAAA
TACTAAGGAAGACGAAAAGACCCCGCGGAGCTTAACTTAACAAAT-TTAAAA-CAACAAA
ATTTTTAAAGTTTGATTGGGGCAATCTTGGAACAATAATAACTTCCAATTTTTAAGAAAA
ACATACAAAGCTTACTAAGAACTAAAAAGCAGCTACCCCGGGGATAACAGCGTTATCCAG
CTTAAGAGTACATATCGAAAGCTGGGTTTGCGACCTCGATGTTGGCTTAAGGGTATCCAC
ATAAGTGCAGCCGCTATGAAAGGATAGTCTGTTCGACTATTGCACCCTTATAAGCGGAGG
AAAAGAAACTAACAAGGATTCCCTCAGTAACGGCGAGTGAAGAGGGAAAAGCCCAGCACC
GAATCCCACAGCCTGGCGCTGTCGGGAACTGTGGTGTATAGGAAGCCTTCTTGCCAGCGT
GTTCGGGTTCCCAAGTCCTCCTGATCGTGGCCTTGCCCATAGCGGGTGTCAGGCCCGTCG
AGGCACCCGACGGCGCTGGCTTGGAGCTTCCTCGGAGTCGGGTTGTTTGGGAATGCAGCC
CAAAGGGGTGGTAAACTCCATCTAAGGCTAAATACGTTCACGAGTCCGATAGCAAACAAG
TACCGTGAGGGAAAGTTGAAAAGAACTTTGAAGAGAGAGTTCAAGAGTACGTGAAACCGC
TTAGAGGCAAACGGGTGGAACCGCAATGCGTCGACCCGGGGGATTCAGCCAGTAAATCGG
GACGGGCTTAGGCCGCGGAGCCGAAAAGCCCGCGCCTTTGCTTGGTCTCCGGGCGGACTG
GTGCACTTTCCTCGGGTTGATGGCCACGACCGGCTCTCTGCGGCCAGAAAGCTACGACCG
GGAAGGTGACCCACAGCCACGGTGTTATAGCCCGGCTAGCCTGA-ACGCTCGTCGGAGGG
CCGAGG-CGCCGCACGTCGCTACCCGCGCCATCCTTGCTCGTCACA--TGGGTTGGACTG
CTCCGTCAGTGCTAT-CCGACAGCGAGCGTAGGAAGGGCCGGCACGGTGCGACGGGCATC
GGGCCATTGGCGAATCGGTCGGTCTTCCNNNNNNNN
>958_2_R_myitkyinae
GAACTTTGTATTTACTATCAGCTTTGTGGTCTGGGTTAATTGGGTTGGCTCTTAGGTTGT
TAATTCGAGCTGAGTTAGGTCAACCGGGGAGATTATTAGGGGATGACCAATTATATAATG
TGATCGTAACCGCTCATGCTTTTATAATAATTTTTTTCTTGGTTATACCAATGATAATCG
GTGGATTTGGTAATTGGTTGATTCCATTAATGATTGGGGCCCCTGATATAGCTTTTCCTC
GGTTAAATAATTTAAGGTTTTGGTTACTTGTGCCTGCTTTGTTTTTGTTATTAAGATCTT
CGTTGGTGGAAAGCGGTGTTGGAACTGGTTGGACTGTTTATCCACCTTTGTCTGGTAATG
TGGCACATTCGGGGGCTTCTGTTGATTTGGCTATTTTTTCATTACATCTTGCTGGTGCTT
CATCAATTTTAGGGGCTATTAATTTTATTTCTACTGTGGGTAATATACGTTCGCCTGGGT
TGGTGGCTGAGCGAATTCCTTTGTTTGTGTGAAGAGTTACTGTGACGGCTGTTTTATTGG
TGGCAGCTTTACCTGTTTTAGCTGGTGCTATTACTATGCTTCTTACTGATCGTAACTTAA
ACACGTCATTTTTTGACCCTACTGGTGGTGGTGATCCTATTTTGTATATCCATTTGTTTT
TCGTCTTTTGTTAATTCAAAATAAAAGATAATGCCTGCCCAGTGAATTTTAACGGCCGCG
TTAGCGTGAGCGTGCTAAGGTAGCGTAATAAATAGCCTTTTAATTGAAGGCCAGTGAATG
GCAAGACTAGGAATATCTCTACCAGAAAAAAAACTTTTCATTTGAGTGAAAAGACTCAAA
TACTAAGGAAGACGAAAAGACCCCGCGGAGCTTAACTTAACAAAT-TTAAAA-CAACAAA
ATTTTTAAAGTTTGATTGGGGCAATCTTGGAACAATAATAACTTCCAATTTTTAAGAAAA
ACATACAAAGCTTACTAAGAACTAAAAAGCAGCTACCCCGGGGATAACAGCGTTATCCAG
CTTAAGAGTACATATCGAAAGCTGGGTTTGCGACCTCGATGTTGGCTTAAGGGTATCCAC
ATAAGTGCAGCCGCTATGAAAGGATAGTCTGTTCGACTATTGCACCCTTATAAGCGGAGG
AAAAGAAACTAACAAGGATTCCCTCAGTAACGGCGAGTGAAGAGGGAAAAGCCCAGCACC
GAATCCCACAGCCTGGCGCTGTCGGGAACTGTGGTGTATAGGAAGCCTTCTTGCCAGCGT
GTTCGGGTTCCCAAGTCCTCCTGATCGTGGCCTTGCCCATAGCGGGTGTCAGGCCCGTCG
AGGCACCCGACGGCGCTGGCTTGGAGCTTCCTCGGAGTCGGGTTGTTTGGGAATGCAGCC
CAAAGGGGTGGTAAACTCCATCTAAGGCTAAATACGTTCACGAGTCCGATAGCAAACAAG
TACCGTGAGGGAAAGTTGAAAAGAACTTTGAAGAGAGAGTTCAAGAGTACGTGAAACCGC
TTAGAGGCAAACGGGTGGAACCGCAATGCGTCGACCCGGGGGATTCAGCCAGTAAATCGG
GACGGGCTTAGGCCGCGGAGCCGAAAAGCCCGCGCCTTTGCTTGGTCTCCGGGCGGACTG
GTGCACTTTCCTCGGGTTGATGGCCACGACCGGCTCTCTGCGGCCAGAAAGCTACGACCG
GGAAGGTGACCCACAGCCACGGTGTTATAGCCCGGCTAGCCTGA-ACGCTCGTCGGAGGG
CCGAGG-CGCCGCACGTCGCTACCCGCGCCATCCTTGCTCGTCACA--TGGGTTGGACTG
CTCCGTCAGTGCTAT-CCGACAGCGAGCGTAGGAAGGGCCGGCACGGTGCGACGGGCATC
GGGCCAGTGGCGAATCGGTCGGTCTTCCNNNNNNNN
>958_3_R_myitkyinae
GAACTTTGTATTTACTATCAGCTTTGTGGTCTGGGTTAATTGGGTTGGCTCTTAGGTTGT
TAATTCGAGCTGAGTTAGGTCAACCGGGGAGATTATTAGGGGATGACCAATTGTATAATG
TGATCGTAACCGCTCATGCTTTTATAATAATTTTTTTCTTGGTTATACCAATGATAATCG
GTGGATTTGGTAATTGGTTGATTCCATTAATGATTGGGGCCCCTGATATAGCTTTTCCTC
GGTTAAATAATTTAAGGTTTTGGTTACTTGTGCCTGCTTTGTTTTTGTTATTAAGATCTT
CGTTGGTGGAAAGCGGTGTTGGAACTGGTTGGACTGTTTATCCACCTTTGTCTGGTAATG
TGGCACATTCGGGGGCTTCTGTTGATTTGGCTATTTTTTCATTACATCTTGCTGGTGCTT
CATCAATTTTAGGGGCTATTAATTTTATTTCTACTGTGGGTAATATACGTTCGCCTGGGT
TGGTGGCTGAGCGAATTCCTTTGTTTGTGTGAAGAGTTACTGTGACGGCTGTTTTATTGG
TGGCAGCTTTACCTGTTTTAGCTGGTGCTATTACTATGCTTCTTACTGATCGTAACTTAA
ACACGTCATTTTTTGACCCTACTGGTGGTGGTGATCCTATTTTGTATATCCATTTGTTTT
TCGTCTTTTGTTAATTCAAAATAAAAGATAATGCCTGCCCAGTGAATTTTAACGGCCGCG
TTAGCGTGAGCGTGCTAAGGTAGCGTAATAAATAGCCTTTTAATTGAAGGCCAGTGAATG
GCAAGACTAGGAATATCTCTACCAGAAAAAAAACTTTTCATTTGAGTGAAAAGACTCAAA
TACTAAGGAAGACGAAAAGACCCCGCGGAGCTTAACTTAACAAAT-TTAAAA-CAACAAA
ATTTTTAAAGTTTGATTGGGGCAATCTTGGAATAATAATAACTTCCAATTTTTAAGAAAA
ACATACAAAGCTTACTAAGAACTAAAAAGCAGCTACCCCGGGGATAACAGCGTTATCCAG
CTTAAGAGTACATATCGAAAGCTGGGTTTGCGACCTCGATGTTGGCTTAAGGGTATCCAC
ATAAGTGCAGCCGCTATGAAAGGATAGTCTGTTCGACTATTGCACCCTTATAAGCGGAGG
AAAAGAAACTAACAAGGATTCCCTCAGTAACGGCGAGTGAAGAGGGAAAAGCCCAGCACC
GAATCCCACAGCCTGGCGCTGTCGGGAACTGTGGTGTATAGGAAGCCTTCTTGCCAGCGT
GTTCGGGTTCCCAAGTCCTCCTGATCGTGGCCTTGCCCATAGCGGGTGTCAGGCCCGTCG
AGGCACCCGACGGCGCTGGCTTGGAGCTTCCTCGGAGTCGGGTTGTTTGGGAATGCAGCC
CAAAGGGGTGGTAAACTCCATCTAAGGCTAAATACGTTCACGAGTCCGATAGCAAACAAG
TACCGTGAGGGAAAGTTGAAAAGAACTTTGAAGAGAGAGTTCAAGAGTACGTGAAACCGC
TTAGAGGCAAACGGGTGGAACCGCAATGCGTCGACCCGGGGGATTCAGCCAGTAAATCGG
GACGGGCTTAGGCCGCGGAGCCGAAAAGCCCGCGCCTTTGCTTGGTCTCCGGGCGGACTG
GTGCACTTTCCTCGGGTTGATGGCCACGACCGGCTCTCTGCGGCCAGAAAGCTACGACCG
GGAAGGTGACCCACAGCCACGGTGTTATAGCCCGGCTAGCCTGA-ACGCTCGTCGGAGGG
CCGAGG-CGCCGCACGTCGCTACCCGCGCCATCCTTGCTCGTCACA--TGGGTTGGACTG
CTCCGTCAGTGCTAT-CCGACAGCGAGCGTAGGAAGGGCCGGCACGGTGCGACGGGCATC
GGGCCAGTGGCGAATCGGTCGGTCTTCCNNNNNNNN
>671_1_R_crispisulcata
GAACTTTGTATTTGTTGTTAGCTTTGTGGTCTGGGTTAATTGGGTTGGCTCTAAGGTTGT
TAATTCGAGCTGAGTTAGGTCAACCTGGGAGGTTATTAGGAGATGACCAATTATATAATG
TGATTGTAACTGCTCATGCCTTTATAATAATTTTTTTCTTAGTTATACCAATGATGATTG
GTGGATTTGGTAATTGGTTAATCCCATTAATGATTGGGGCTCCTGATATGGCTTTTCCTC
GATTAAATAACTTAAGGTTTTGGTTACTTGTGCCTGCTTTGTTTTTGTTATTAAGATCTT
CGTTGGTAGAAAGTGGTGTTGGAACCGGTTGGACTGTTTACCCTCCTTTGTCAGGTAATG
TGGCACATTCGGGGGCTTCTGTTGATTTGGCTATTTTTTCATTGCATCTCGCTGGTGCTT
CATCAATTTTGGGGGCTATTAACTTTATTTCTACTGTGGGGAATATACGTTCACCTGGGT
TGGTAGCTGAGCGAATTCCTTTGTTTGTATGAAGAGTTACTGTGACGGCTGTTTTGTTGG
TGGCAGCTTTACCTGTTTTGGCTGGTGCTATTACTATGCTTCTTACTGATCGTAATTTAA
ATACGTCGTTTTTTGATCCTACTGGTGGTGGTGATCCTATTTTGTATATGCATTTGTTTT
TCGTCTTTTGTTAATTCAAAATAAAAGATAATGCCTGCCCAGTGAATTTTAACGGCCGCG
TTAGCGTGAGCGTGCTAAGGTAGCGTAATAAATAGCCTTTTAATTGAAGGCCAGTGAATG
GCAAGACTAGGAATACCTCTACCAGAAAAAAAACTTTTCGTTTGAGTGAAAAGACTCAAA
TACTAAGGAAGACGAAAAGACCCCGCGGAACTTAACTTAATAAAT-TTAAAA-CAGTAAA
ATTTTAAAAGTTTGATTGGGGCAATCTTGGAACAACAATAACTTCCAATTTTTTAGAAAA
ACATACAAAGCTTATTAAGAACTAAAAAGCAGTTACCCCGGGGATAACAGCGTCATCCAG
CTTAAGAGTACTTATCGAAAGCTGGGTTTGCGACCTCGATGTTGGCTTAAGGGTATCCAC
ATAAGTGCAGCCGCTATGAAAGGATAGTCTGTTCGACTATTGCACCCTTATAAGCGGAGG
AAAAGAAACTAACAAGGATTCCCTCAGTAACGGCGAGTGAAGAGGGAAAAGCCCAGCACC
GAATCCCACAGCCTTGCGCTGTCGGGAACTGTGGTGTATAGGAAGCCTTCTTGCCAGCGT
GTTCGGGTTCCCAAGTCCTCCTGATCGTGGCCTTGCCCATAGCGGGTGTCAGGCCCGTCG
AGGCACCCGACGGCGCTGGCTTGGAGCTTCCTGGGAGTCGGGTTGTTTGGGAATGCAGCC
CAAAGGGGTGGTAAACTCCATCTAAGGCTAAATACGTTCACGAGTCCGATAGCAAACAAG
TACCGTGAGGGAAAGTTGAAAAGAACTTTGAAGAGAGAGTTCAAGAGTACGTGAAACCGC
TTAGAGGCAAACGGGTGGAACCGCAATGCGTCGACCCGGGGGATTCAGCCAGTAAATCGG
GACGGGCTTAGGCCGCGGAGCCGAAAAGCCCGCGCCTTTGCTTGGTCTCCGGGCGGACTG
GTGCACTTTCCTCGGGTTGATGGCCACGACCGGCTCTCCGCGGCCAGAAAGCTAGTACCG
GGAAGGTGACCCACAGCCTCGGTGTTATAGCCCGGCTAGCCTGA-GCGCTCGTCGGAGGG
CCGAGG-CGCCGCACGTCGCTACCCGCGCCATCCTTGCTCGTCACA--TGGGTTGGACTG
CTCCGTCAGTGCTAT-CCGACAGCGAGCGTAGGAAGGGCCGGCACGGTGCGACGGGCATC
GGGCCAGTGGCGAATCGGTCGGTCTTCCACCCGACC
>671_3_R_crispisulcata
GAACTTTGTATTTGTTGTTAGCTTTGTGGTCTGGGTTAATTGGGTTGGCTCTAAGGTTGT
TAATTCGAGCTGAGTTAGGTCAACCTGGGAGGTTATTAGGAGATGACCAATTATATAATG
TGATTGTAACTGCTCATGCCTTTATAATAATTTTTTTCTTAGTTATACCAATGATGATTG
GTGGATTTGGTAATTGGTTAATCCCATTAATGATTGGGGCTCCTGATATGGCTTTTCCTC
GATTAAATAACTTAAGGTTTTGGTTACTTGTGCCTGCTTTGTTTTTGTTATTAAGATCTT
CGTTGGTAGAAAGTGGTGTTGGAACCGGTTGGACTGTTTACCCTCCTTTGTCAGGTAATG
TGGCACATTCGGGGGCTTCTGTTGATTTGGCTATTTTTTCATTGCATCTCGCTGGTGCTT
CATCAATTTTGGGGGCTATTAACTTTATTTCTACTGTGGGGAATATACGTTCACCTGGGT
TGGTAGTTGAGCGAATTCCTTTGTTTGTATGAAGAGTTACTGTGACGGCTGTTTTGTTGG
TGGCAGCTTTACCTGTTTTGGCTGGTGCTATTACTATGCTTCTTACTGATCGTAATTTAA
ATACGTCGTTTTTTGATCCTACTGGTGGTGGTGATCCTATTTTGTATATGCATTTGTTTT
TCGTCTTTTGTTAATTCAAAATAAAAGATAATGCCTGCCCAGTGAATTTTAACGGCCGCG
TTAGCGTGAGCGTGCTAAGGTAGCGTAATAAATAGCCTTTTAATTGAAGGCCAGTGAATG
GCAAGACTAGGAATACCTCTACCAGAAAAAAAACTTTTCGTTTGAGTGAAAAGACTCAAA
TACTAAGGAAGACGAAAAGACCCCGCGGAACTTAACTTAATAAAT-TTAAAA-CAGTAAA
ATTTTAAAAGTTTGATTGGGGCAATCTTGGAACAACAATAACTTCCAATTTTTTAGAAAA
ACATACAAAGCTTATTAAGAACTAAAAAGCAGTTACCCCGGGGATAACAGCGTCATCCAG
CTTAAGAGTACTTATCGAAAGCTGGGTTTGCGACCTCGATGTTGGCTTAAGGGTATCCAC
ATAAGTGCAGCCGCTATGAAAGGATAGTCTGTTCGACTATTGCACCCTTATAAGCGGAGG
AAAAGAAACTAACAAGGATTCCCTCAGTAACGGCGAGTGAAGAGGGAAAAGCCCAGCACC
GAATCCCACAGCCTTGCGCTGTCGGGAACTGTGGTGTATAGGAAGCCTTCTTGCCAGCGT
GTTCGGGTTCCCAAGTCCTCCTGATCGTGGCCTTGCCCATAGCGGGTGTCAGGCCCGTCG
AGGCACCCGACGGCGCTGGCTTGGAGCTTCCTGGGAGTCGGGTTGTTTGGGAATGCAGCC
CAAAGGGGTGGTAAACTCCATCTAAGGCTAAATACGTTCACGAGTCCGATAGCAAACAAG
TACCGTGAGGGAAAGTTGAAAAGAACTTTGAAGAGAGAGTTCAAGAGTACGTGAAACCGC
TTAGAGGCAAACGGGTGGAACCGCAATGCGTCGACCCGGGGGATTCAGCCAGTAAATCGG
GACGGGCTTAGGCCGCGGAGCCGAAAAGCCCGCGCCTTTGCTTGGTCTCCGGGCGGACTG
GTGCACTTTCCTCGGGTTGATGGCCACGACCGGCTCTCCGCGGCCAGAAAGCTAGTACCG
GGAAGGTGACCCACAGCCTCGGTGTTATAGCCCGGCTAGCCTGA-GCGCTCGTCGGAGGG
CCGAGG-CGCCGCACGTCGCTACCCGCGCCATCCTTGCTCGTCACA--TGGGTTGGACTG
CTCCGTCAGTGCTAT-CCGACAGCGAGCGTAGGAAGGGCCGGCACGGTGCGACGGGCATC
GGGCCAGTGGCGAATCGGTCGGTCTTCCACCCGACC
>360_1_R_mouhoti_haungthayawensis
GAACTTTATATTTGCTGTTAGCTTTGTGATCTGGCTTAATTGGGTTGGCTCTTAGGTTGT
TAATTCGAGCTGAGTTAGGCCAACCGGGGAGATTGTTAGGAGATGATCAATTATATAATG
TGATTGTAACCGCTCATGCTTTTATAATAATTTTTTTCTTAGTTATACCAATGATAATTG
GTGGATTTGGTAATTGGTTAATTCCATTAATGATTGGGGCTCCTGATATGGCTTTTCCTC
GATTAAATAACTTGAGGTTTTGGTTACTTGTACCTGCTTTGTTTTTGTTATTAAGATCTT
CGTTGGTGGAAAGTGGTGTAGGAACTGGTTGGACCGTTTATCCACCTTTGTCTGGTAATG
TGGCACATTCAGGGGCTTCTGTTGATCTGGCTATTTTTTCATTACATCTTGCTGGTGCTT
CATCAATTTTGGGGGCTATTAATTTTATTTCTACTGTGGGTAATATACGTTCGCCTGGGT
TGGTGGCTGAGCGAATTCCTTTGTTTGTGTGAAGAGTTACTGTGACGGCTGTTTTATTGG
TGGCAGCTTTACCTGTTTTAGCTGGTGCTATTACTATGCTTCTTACTGATCGTAATTTAA
ATACGTCGTTTTTTGATCCTACTGGAGGTGGTGATCCTATTTTATATATGCATTTGTTTT
TCGTCTTTTGTTAATTCAAAATAAAAGATAATGCCTGCCCAGTGAATTTTAACGGCCGCG
TTAGCGTGAGCGTGCTAAGGTAGCGTAATAAATAGCCTTTTAATTGAAGGCCAGTGAATG
GCAAGACTAGGAATACCTCTACCAGAAAAAAAACTTTTCATTTGAGTGAAAAGACTCAAA
TACTAAGGAAGACGAAAAGACCCCGCGGAGCTTAACTTAACAAATTTTAAAACAATAAAC
TTTT-TAAAGTTTGATTGGGGCAATCTTGGAACAATAATAACTTCCAATTTTTAAGAAAA
ACATACAAAGCTTACTAAGAACTAAAAAGCAGCTACCCCGGGGATAACAGCGTTATCCAG
CTTAAGAGTACATATCGAAAGCTGGGTTTGCGACCTCGATGTTGGCTTAAGGGTATCCAC
ATAAGTGCAGCCGCTATGAAAGGATAGTCTGTTCGACTATTGCACCCTTATAAGCGGAGG
AAAAGAAACTAACAAGGATTCCCTCAGTAACGGCGAGTGAAGAGGGAAAAGCCCAGCACC
GAATCCCACAGCCTTGCGCTGTCGGGAACTGTGGTGTATAGGAAGCCTTCTTGCCAGCGT
GTTCGGGTTCCCAAGTCCTCCTGATCGTGGCCTTGCCCATAGCGGGTGTCAGGCCCGTCG
AGGCACCCGACGGCGCTGGCTTGGAGCTTCCTCGGAGTCGGGTTGTTTGGGAATGCAGCC
CAAAGGGGTGGTAAACTCCATCTAAGGCTAAATACGTTCACGAGTCCGATAGCAAACAAG
TACCGTGAGGGAAAGTTGAAAAGAACTTTGAAGAGAGAGTTCAAGAGTACGTGAAACCGC
TTAGAGGCAAACGGGTGGAACCGCAATGCGTCGACCCGGGGGATTCAGCCAGTAAATCGG
GACGGGCTTAGGCCGCGGAGCCGAAAAGCCCGCGCCTTTGCTTGGTCTCCGGGCGGACTG
GTGCACTTTCCTCGGGTTGATGGCCACGACCGGCTCTCTGCGGCCAGAAAGCTACGACCG
GGAAGGTGACCCACAGCCACGGTGTTATAGCCCGGCTAGCCTGA-ACGCTCGTCGGAGGG
CCGAGG-CGCCGCACGTCGCTACCCGCGCCATCCTTGCTCGTCACA--TGGGTTGGACTG
CTCCGTCAGTGCTAT-CCGACAGCGAGCGTAGGAAGGGCCGGCACGGTGCGACGGGCATC
GGGCCAGTGGCGAATCGGTCGGTCTTCCACCCGACC
>360_3_R_mouhoti_haungthayawensis
GAACTTTATATTTGCTGTTAGCTTTGTGATCTGGCTTAATTGGGTTGGCTCTTAGGTTGT
TAATTCGAGCTGAGTTAGGCCAACCGGGGAGATTGTTAGGAGATGATCAATTATATAATG
TGATTGTAACCGCTCATGCTTTTATAATAATTTTTTTCTTAGTTATACCAATGATAATTG
GTGGATTTGGTAATTGGTTAATTCCATTAATGATTGGGGCTCCTGATATGGCTTTTCCTC
GATTAAATAACTTGAGGTTTTGGTTACTTGTACCTGCTTTGTTTTTGTTATTAAGATCTT
CGTTGGTGGAAAGTGGTGTAGGAACTGGTTGGACCGTTTATCCACCTTTGTCTGGTAATG
TGGCACATTCAGGGGCTTCTGTTGATCTGGCTATTTTTTCATTACATCTTGCTGGTGCTT
CATCAATTTTGGGGGCTATTAATTTTATTTCTACTGTGGGTAATATACGTTCGCCTGGGT
TGGTGGCTGAGCGAATTCCTTTGTTTGTGTGAAGAGTTACTGTGACGGCTGTTTTATTGG
TGGCAGCTTTACCTGTTTTAGCTGGTGCTATTACTATGCTTCTTACTGATCGTAATTTAA
ATACGTCGTTTTTTGATCCTACTGGAGGTGGTGATCCTATTTTATATATGCATTTGTTTT
NNNNNNNNNNNNNNNNNNNNNNNNNNNNNNNNNNNNNNNNNNNNNNNNNNNNNNNNNNNN
NNNNNNNNNNNNNNNNNNNNNNNNNNNNNNNNNNNNNNNNNNNNNNNNNNNNNNNNNNNN
NNNNNNNNNNNNNNNNNNNNNNNNNNNNNNNNNNNNNNNNNNNNNNNNNNNNNNNNNNNN
NNNNNNNNNNNNNNNNNNNNNNNNNNNNNNNNNNNNNNNNNNNNNNNNNNNNNNNNNNNN
NNNNNNNNNNNNNNNNNNNNNNNNNNNNNNNNNNNNNNNNNNNNNNNNNNNNNNNNNNNN
NNNNNNNNNNNNNNNNNNNNNNNNNNNNNNNNNNNNNNNNNNNNNNNNNNNNNNNNNNNN
NNNNNNNNNNNNNNNNNNNNNNNNNNNNNNNNNNNNNNNNNNNNNNNNNNNNNNNNNNNN
NNNNNNNNNNNNNNNNNNNNNNNNNNNNNNNNNNNNNNNNNNNNNNNNNNTAAGCGGAGG
AAAAGAAACTAACAAGGATTCCCTCAGTAACGGCGAGTGAAGAGGGAAAAGCCCAGCACC
GAATCCCACAGCCTTGCGCTGTCGGGAACTGTGGTGTATAGGAAGCCTTCTTGCCAGCGT
GTTCGGGTTCCCAAGTCCTCCTGATCGTGGCCTTGCCCATAGCGGGTGTCAGGCCCGTCG
AGGCACCCGACGGCGCTGGCTTGGAGCTTCCTCGGAGTCGGGTTGTTTGGGAATGCAGCC
CAAAGGGGTGGTAAACTCCATCTAAGGCTAAATACGTTCACGAGTCCGATAGCAAACAAG
TACCGTGAGGGAAAGTTGAAAAGAACTTTGAAGAGAGAGTTCAAGAGTACGTGAAACCGC
TTAGAGGCAAACGGGTGGAACCGCAATGCGTCGACCCGGGGGATTCAGCCAGTAAATCGG
GACGGGCTTAGGCCGCGGAGCCGAAAAGCCCGCGCCTTTGCTTGGTCTCCGGGCGGACTG
GTGCACTTTCCTCGGGTTGATGGCCACGACCGGCTCTCTGCGGCCAGAAAGCTACGACCG
GGAAGGTGACCCACAGCCACGGTGTTATAGCCCGGCTAGCCTGA-ACGCTCGTCGGAGGG
CCGAGG-CGCCGCACGTCGCTACCCGCGCCATCCTTGCTCGTCACA--TGGGTTGGACTG
CTCCGTCAGTGCTAT-CCGACAGCGAGCGTAGGAAGGGCCGGCACGGTGCGACGGGCATC
GGGCCAGTGGCGAATCGGTCGGTCTTCCACCCGACC
>345_2_R_chindwinensis
GAACTTTATATTTGTTGTTAGCTTTGTGATCTGGATTAATTGGATTGGCTCTTAGGTTGT
TAATTCGAGCTGAGTTAGGCCAACCGGGGAGATTGTTAGGAGATGATCAATTATATAATG
TAATTGTAACCGCTCATGCTTTTATAATAATTTTTTTCTTAGTTATACCAATGATGATTG
GTGGATTTGGTAATTGATTAATTCCATTAATAATTGGGGCTCCTGATATGGCTTTTCCTC
GACTAAATAATTTAAGGTTTTGGTTACTTGTGCCTGCTTTGTTTTTGTTATTGAGATCTT
CGTTGGTAGAAAGTGGTGTAGGAACTGGTTGGACCGTTTATCCACCTTTGTCTGGTAATG
TGGGACATTCAGGGGCTTCTGTTGATTTGGCTATTTTTTCATTGCATCTTGCTGGTGCTT
CATCAATTTTGGGGGCTATTAATTTTATCTCTACTGTGGGTAATATACGTTCGCCTGGAT
TGGTGGCTGAGCGAATTCCTTTGTTTGTGTGAAGAGTTACTGTGACGGCTGTTTTATTGG
TGGCAGCTTTACCTGTTTTAGCTGGTGCTATTACTATGCTTCTTACTGATCGTAATTTAA
ATACGTCGTTTTTTGACCCTACTGGAGGTGGTGATCCTATTTTGTATATACACTTGTTTT
TCGTCTTTTGTTAATTCAAAATAAAAGATAATGCCTGCCCAGTGAATTTTAACGGCCGCG
TTAGCGTGAGCGTGCTAAGGTAGCGTAATAAATAGCCTTTTAATTGAAGGCCAGTGAATG
GCAAGACTAGGAATACCTCTACCAGAAAAAAAACTTTTCATTTGAGTGAAAAGACTCAAA
TACTAAGGAAGACGAAAAGACCCCGCGGAGCTTAACTTAACAAAT-TTAAAA-CAATAAA
ATTTTTAAAGTTTGATTGGGGCAATCTTGGAACAATAATAACTTCCAATTTTTAAGAAAA
ACATACAAAGCTTACTAAGAACTAAAAAGCAGCTACCCCGGGGATAACAGCGTTATCCAG
CTTAAGAGTACATATCGAAAGCTGGGTTTGCGACCTCGATGTTGGCTTAAGGGTATCCAC
ATAAGTGCAGCCGCTATGAAAGGATAGTCTGTTCGACTATTGCACCCTTATAAGCGGAGG
AAAAGAAACTAACAAGGATTCCCTCAGTAACGGCGAGTGAAGAGGGACAAGCCCAGCACC
GAATCCCACAGCCTTGCGCTGTCGGGAACTGTGGTGTATAGGAAGCCTTCTTGCCAGCGT
GTTCGGGTTCCCAAGTCCTCCTGATCGTGGCCTTGCCCATAGCGGGTGTCAGGCCCGTCG
AGGCACCCGACGGCGCTGGCTTGGAGCTTCCTCGGAGTCGGGTTGTTTGGGAATGCAGCC
CAAAGGGGTGGTAAACTCCATCTAAGGCTAAATACGTTCACGAGTCCGATAGCAAACAAG
TACCGTGAGGGAAAGTTGAAAAGAACTTTGAAGAGAGAGTTCAAGAGTACGTGAAACCGC
TTAGAGGCAAACGGGTGGAACCGCAATGCGTCGACCCGGGGGATTCAGCCAGTAAATCGG
GACGGGCTTAGGCCGCGGAGCCGAAAAGCCCGCGCCTTTGCTTGGTCTCCGGGCGGACTG
GTGCACTTTCCTCGGGTTGATGGCCACGACCGGCTCTCTGCGGCCAGAAAGCTACGACCG
GGAAGGTGACCCACAGCCACGGTGTTATAGCCCGGCTAGCCTGA-ACGCTCGTCGGAGGG
CCGAGG-CGCCGCACGTCGCTACCCGCGCCATCCTTGCTCGTCACA--TGGGTTGGACTG
CTCCGTCAGTGCTAT-CCGACAGCGAGCGTAGGAAGGGCCGGCACGGTGCGACGGGCATC
GGGCCAGTGGCGAATCGGTCGGTCTTCCACCCGACC
>348_2_R_chindwinensis
GAACTTTATATTTGTTGTTAGCTTTGTGATCTGGATTAATTGGATTGGCTCTTAGGTTGT
TAATTCGAGCTGAGTTAGGCCAACCGGGGAGATTGTTAGGAGATGATCAATTATATAATG
TAATTGTAACCGCTCATGCTTTTATAATAATTTTTTTCTTAGTTATACCAATGATGATTG
GTGGATTTGGTAATTGATTAATTCCATTAATAATTGGGGCTCCTGATATGGCTTTTCCTC
GACTAAATAATTTAAGGTTTTGGTTACTTGTGCCTGCTTTGTTTTTGTTATTGAGATCTT
CGTTGGTAGAAAGTGGTGTAGGAACTGGTTGGACCGTTTATCCACCTTTGTCTGGTAATG
TGGGACATTCAGGGGCTTCTGTTGATTTGGCTATTTTTTCATTGCATCTTGCTGGTGCTT
CATCAATTTTGGGGGCTATTAATTTTATCTCTACTGTGGGTAATATACGTTCGCCTGGAT
TGGTGGCTGAGCGAATTCCTTTGTTTGTGTGAAGAGTTACTGTGACGGCTGTTTTATTGG
TGGCAGCTTTACCTGTTTTAGCTGGTGCTATTACTATGCTTCTTACTGATCGTAATTTAA
ATACGTCGTTTTTTGACCCTACTGGAGGTGGTGATCCTATTTTGTATATACACTTGTTTT
TCGTCTTTTGTTAATTCAAAATAAAAGATAATGCCTGCCCAGTGAATTTTAACGGCCGCG
TTAGCGTGAGCGTGCTAAGGTAGCGTAATAAATAGCCTTTTAATTGAAGGCCAGTGAATG
GCAAGACTAGGAATACCTCTACCAGAAAAAAAACTTTTCATTTGAGTGAAAAGACTCAAA
TACTAAGGAAGACGAAAAGACCCCGCGGAGCTTAACTTAACAAAT-TTAAAA-CAATAAA
ATTTTTAAAGTTTGATTGGGGCAATCTTGGAACAATAATAACTTCCAATTTTTAAGAAAA
ACATACAAAGCTTACTAAGAACTAAAAAGCAGCTACCCCGGGGATAACAGCGTTATCCAG
CTTAAGAGTACATATCGAAAGCTGGGTTTGCGACCTCGATGTTGGCTTAAGGGTATCCAC
ATAAGTGCAGCCGCTATGAAAGGATAGTCTGTTCGACTATTGCACCCTTATAAGCGGAGG
AAAAGAAACTAACAAGGATTCCCTCAGTAACGGCGAGTGAAGAGGGAAAAGCCCAGCACC
GAATCCCACAGCCTTGCGCTGTCGGGAACTGTGGTGTATAGGAAGCCTTCTTGCCAGCGT
GTTCGGGTTCCCAAGTCCTCCTGATCGTGGCCTTGCCCATAGCGGGTGTCAGGCCCGTCG
AGGCACCCGACGGCGCTGGCTTGGAGCTTCCTCGGAGTCGGGTTGTTTGGGAATGCAGCC
CAAAGGGGTGGTAAACTCCATCTAAGGCTAAATACGTTCACGAGTCCGATAGCAAACAAG
TACCGTGAGGGAAAGTTGAAAAGAACTTTGAAGAGAGAGTTCAAGAGTACGTGAAACCGC
TTAGAGGCAAACGGGTGGAACCGCAATGCGTCGACCCGGGGGATTCAGCCAGTAAATCGG
GACGGGCTTAGGCCGCGGAGCCGAAAAGCCCGCGCCTTTGCTTGGTCTCCGGGCGGACTG
GTGCACTTTCCTCGGGTTGATGGCCACGACCGGCTCTCTGCGGCCAGAAAGCTACGACCG
GGAAGGTGACCCACAGCCACGGTGTTATAGCCCGGCTAGCCTGA-ACGCTCGTCGGAGGG
CCGAGG-CGCCGCACGTCGCTACCCGCGCCATCCTTGCTCGTCACA--TGGGTTGGACTG
CTCCGTCAGTGCTAT-CCGACAGCGAGCGTAGGAAGGGCCGGCACGGTGCGACGGGCATC
GGGCCAGTGGCGAATCGGTCGGTCTTCCACCCGACC
>357_1_R_chindwinensis
GAACTTTATATTTGTTGTTAGCTTTGTGATCTGGATTAATTGGATTGGCTCTTAGGTTGT
TAATTCGAGCTGAGTTAGGCCAACCGGGGAGATTATTAGGAGATGATCAATTATATAATG
TAATTGTAACCGCTCATGCTTTTATAATAATTTTTTTCTTAGTTATACCAATGATGATTG
GTGGATTTGGTAATTGATTAATTCCATTAATAATTGGGGCTCCTGATATGGCTTTTCCTC
GACTAAATAATTTAAGGTTTTGGTTACTTGTGCCTGCTTTGTTTTTGTTATTGAGATCTT
CGTTGGTAGAAAGTGGTGTAGGAACTGGTTGGACCGTTTATCCACCTTTGTCTGGTAATG
TGGGACATTCAGGGGCTTCTGTTGATTTGGCTATTTTTTCATTGCATCTTGCTGGTGCTT
CATCAATTTTGGGGGCTATTAATTTTATCTCTACTGTGGGTAATATACGTTCGCCTGGAT
TGGTGGCTGAGCGAATTCCTTTGTTTGTGTGAAGAGTTACTGTGACGGCTGTTTTATTGG
TGGCAGCTTTACCTGTTTTAGCTGGTGCTATTACTATGCTTCTTACTGATCGTAATTTAA
ATACGTCGTTTTTTGACCCTACTGGAGGTGGTGATCCTATTTTGTATATACACTTGTTTT
TCGTCTTTTGTTAATTCAAAATAAAAGATAATGCCTGCCCAGTGAATTTTAACGGCCGCG
TTAGCGTGAGCGTGCTAAGGTAGCGTAATAAATAGCCTTTTAATTGAAGGCCAGTGAATG
GCAAGACTAGGAATACCTCTACCAGAAAAAAAACTTTTCATTTGAGTGAAAAGACTCAAA
TACTAAGGAAGACGAAAAGACCCCGCGGAGCTTAACTTAACAAAT-TTAAAA-CAATAAA
ATTTTTAAAGTTTGATTGGGGCAATCTTGGAACAATAATAACTTCCAATTTTTAAGAAAA
ACATACAAAGCTTACTAAGAACTAAAAAGCAGCTACCCCGGGGATAACAGCGTTATCCAG
CTTAAGAGTACATATCGAAAGCTGGGTTTGCGACCTCGATGTTGGCTTAAGGGTATCCAC
ATAAGTGCAGCCGCTATGAAAGGATAGTCTGTTCGACTATTGCACCCTTATAAGCGGAGG
AAAAGAAACTAACAAGGATTCCCTCAGTAACGGCGAGTGAAGAGGGACAAGCCCAGCACC
GAATCCCACAGCCTTGCGCTGTCGGGAACTGTGGTGTATAGGAAGCCTTCTTGCCAGCGT
GTTCGGGTTCCCAAGTCCTCCTGATCGTGGCCTTGCCCATAGCGGGTGTCAGGCCCGTCG
AGGCACCCGACGGCGCTGGCTTGGAGCTTCCTCGGAGTCGGGTTGTTTGGGAATGCAGCC
CAAAGGGGTGGTAAACTCCATCTAAGGCTAAATACGTTCACGAGTCCGATAGCAAACAAG
TACCGTGAGGGAAAGTTGAAAAGAACTTTGAAGAGAGAGTTCAAGAGTACGTGAAACCGC
TTAGAGGCAAACGGGTGGAACCGCAATGCGTCGACCCGGGGGATTCAGCCAGTAAATCGG
GACGGGCTTAGGCCGCGGAGCCGAAAAGCCCGCGCCTTTGCTTGGTCTCCGGGCGGACTG
GTGCACTTTCCTCGGGTTGATGGCCACGACCGGCTCTCTGCGGCCAGAAAGCTACGACCG
GGAAGGTGACCCACAGCCACGGTGTTATAGCCCGGCTAGCCTGA-ACGCTCGTCGGAGGG
CCGAGG-CGCCGCACGTCGCTACCCGCGCCATCCTTGCTCGTCACA--TGGGTTGGACTG
CTCCGTCAGTGCTAT-CCGACAGCGAGCGTAGGAAGGGCCGGCACGGTGCGACGGGCATC
GGGCCAGTGGCGAATCGGTCGGTCTTCCACCCGACC
>337_3_R_myitthanensis
GAACTTTGTATTTGCTGTTAGCTTTGTGGTCTGGGTTAATTGGGTTGGCTCTTAGGTTGC
TAATTCGAGCTGAGTTAGGCCAACCGGGGAGATTGTTAGGAGATGATCAATTATATAATG
TGATTGTAACCGCTCATGCTTTTATAATAATTTTTTTCTTAGTTATACCAATGATGATTG
GTGGATTTGGTAATTGATTAATCCCATTAATGATTGGGGCTCCTGATATGGCTTTTCCTC
GATTAAATAATTTAAGGTTTTGGTTACTTGTACCTGCTTTGTTTTTGTTACTAAGATCTT
CGTTGGTGGAAAGCGGTGTAGGAACTGGTTGGACCGTTTATCCACCTTTGTCTGGTAATG
TGGCACATTCGGGGGCTTCTGTTGATTTAGCTATTTTTTCATTGCATCTTGCTGGTGCTT
CGTCGATTTTGGGAGCTATTAACTTTATTTCTACTGTGGGTAATATACGTTCGCCTGGGT
TGGTGGCTGAGCGAATTCCTTTGTTTGTGTGAAGAGTTACTGTGACCGCTGTTTTATTGG
TGGCAGCTTTACCTGTTTTAGCTGGTGCTATTACTATACTTCTTACTGATCGTAATTTAA
ATACGTCGTTTTTTGATCCTACTGGAGGTGGTGATCCTATTTTGTATATACACTTGTTTT
TCGTCTTTTGTTAATTCAAAATAAAAGATAATGCCTGCCCAGTGAATTTTAACGGCCGCG
TTAGCGTGAGCGTGCTAAGGTAGCGTAATAAATAGCCTTTTAATTGAAGGCCAGTGAATG
GCAAGACTAGGAATACCTCTACCAGAAAAAAAACTTTTCATTTGAGTGAAAAGACTCAAA
TACTAAGGAAGACGAAAAGACCCCGCGGAGCTTAACTTAACAAGT-TTAAAA-CAATAAA
ATTTTTAAAGTTTGATTGGGGCAATCTTGGAACAATAATAACTTCCAATTTTTAACAAAA
ACATACAAAACTTACTAAGAACTAAAAAGCAGCTACCCCGGGGATAACAGCGTTATCCAG
CTTAAGAGTACATATCGAAAGCTGGGTTTGCGACCTCGATGTTGGCTTAAGGGTATCCAC
ATAAGTGCAGCCGCTATGAAAGGATAGTCTGTTCGACTATTGCACCCTTATAAGCGGAGG
AAAAGAAACTAACAAGGATTCCCTCAGTAACGGCGAGTGAAGAGGGAAAAGCCCAGCACC
GAATCCCACAGCCTTGCGCTGTCGGGAACTGTGGTGTATAGGAAGCCTTCTTGCCAGCGT
GTTCGGGTTCCCAAGTCCTCCTGATCGTGGCCTTGCCCATAGCGGGTGTCAGGCCCGTCG
AGGCACCCGACGGCGCTGGCTTGGAGCTTCCTCGGAGTCGGGTTGTTTGGGAATGCAGCC
CAAAGGGGTGGTAAACTCCATCTAAGGCTAAATACGTTCACGAGTCCGATAGCAAACAAG
TACCGTGAGGGAAAGTTGAAAAGAACTTTGAAGAGAGAGTTCAAGAGTACGTGAAACCGC
TTAGAGGCAAACGGGTGGAACCGCAATGCGTCGACCCGGGGGATTCAGCCAGTAAATCGG
GACGGGCTTAGGCCGCGGAGCCGAAAAGCCCGCGCCTTTGCTTGGTCTCCGGGCGGACTG
GTGCACTTTCCTCGGGTTGATGGCCACGACCGGCTCTCTGCGGCCAGAAAGCTACGACCG
GGAAGGTGACCCACAGCCACGGTGTTATAGCCCGGCTAGCCTGA-ACGCTCGTCGGAGGG
CCGAGG-CGCCGCACGTCGCTACCCGCGCCATCCTTGCTCGTCACA--TGGGTTGGACTG
CTCCGTCAGTGCTAT-CCGACAGCGAGCGTAGGAAGGGCCGGCACGGTGCGACGGGCATC
GGGCCAGTGGCGAATCGGTCGGTCTTCCACCCGACC
>348_1_R_myitthanensis
GAACTTTATATTTGTTGTTAGCTTTGTGATCTGGATTAATTGGATTGGCTCTTAGGTTGT
TAATTCGAGCTGAGTTAGGCCAACCGGGGAGATTGTTAGGAGATGATCAATTATATAATG
TGATTGTAACCGCTCATGCTTTTATAATAATTTTTTTCTTAGTTATACCAATGATGATTG
GTGGATTTGGTAATTGATTAATCCCATTAATGATTGGGGCTCCTGATATGGCTTTTCCTC
GATTAAATAATTTAAGGTTTTGGTTACTTGTACCTGCTTTGTTTTTGTTACTAAGATCTT
CGTTGGTGGAAAGCGGTGTAGGAACTGGTTGGACCGTTTATCCACCTTTGTCTGGTAATG
TGGCACATTCGGGGGCTTCTGTTGATTTAGCTATTTTTTCATTGCATCTTGCTGGTGCTT
CGTCGATTTTGGGAGCTATCAACTTTATTTCTACTGTGGGTAATATACGTTCGCCTGGGT
TGGTGGCTGAGCGAATTCCTTTATTTGTGTGAAGAGTTACTGTGACCGCTGTTTTATTGG
TGGCAGCTTTACCTGTTTTAGCTGGTGCTATTACTATACTTCTTACTGATCGTAATTTAA
ATACGTCGTTTTTTGATCCTACTGGAGGTGGTGATCCTATTTTGTATATACACTTGTTTT
TCGTCTTTTGTTAATTCAAAATAAAAGATAATGCCTGCCCAGTGAATTTTAACGGCCGCG
TTAGCGTGAGCGTGCTAAGGTAGCGTAATAAATAGCCTTTTAATTGAAGGCCAGTGAATG
GCAAGACTAGGAATACCTCTACCAGAAAAAAAACTTTTCATTTGAGTGAAAAGACTCAAA
TACTAAGGAAGACGAAAAGACCCCGCGGAGCTTAACTTAACAAGT-TTAAAA-CAATAAA
ATTTTTAAAGTTTGATTGGGGCAATCTTGGAACAATAATAACTTCCAATTTTTAACAAAA
ACATACAAAACTTACTAAGAACTAAAAAGCAGCTACCCCGGGGATAACAGCGTTATCCAG
CTTAAGAGTACATATCGAAAGCTGGGTTTGCGACCTCGATGTTGGCTTAAGGGTATCCAC
ATAAGTGCAGCCGCTATGAAAGGATAGTCTGTTCGACTATTGCACCCTTATAAGCGGAGG
AAAAGAAACTAACAAGGATTCCCTCAGTAACGGCGAGTGAAGAGGGAAAAGCCCAGCACC
GAATCCCACAGCCTTGCGCTGTCGGGAACTGTGGTGTATAGGAAGCCTTCTTGCCAGCGT
GTTCGGGTTCCCAAGTCCTCCTGATCGTGGCCTTGCCCATAGCGGGTGTCAGGCCCGTCG
AGGCACCCGACGGCGCTGGCTTGGAGCTTCCTCGGAGTCGGGTTGTTTGGGAATGCAGCC
CAAAGGGGTGGTAAACTCCATCTAAGGCTAAATACGTTCACGAGTCCGATAGCAAACAAG
TACCGTGAGGGAAAGTTGAAAAGAACTTTGAAGAGAGAGTTCAAGAGTACGTGAAACCGC
TTAGAGGCAAACGGGTGGAACCGCAATGCGTCGACCCGGGGGATTCAGCCAGTAAATCGG
GACGGGCTTAGGCCGCGGAGCCGAAAAGCCCGCGCCTTTGCTTGGTCTCCGGGCGGACTG
GTGCACTTTCCTCGGGTTGATGGCCACGACCGGCTCTCTGCGGCCAGAAAGCTACGACCG
GGAAGGTGACCCACAGCCACGGTGTTATAGCCCGGCTAGCCTGA-ACGCTCGTCGGAGGG
CCGAGG-CGCCGCACGTCGCTACCCGCGCCATCCTTGCTCGTCACA--TGGGTTGGACTG
CTCCGTCAGTGCTAT-CCGACAGCGAGCGTAGGAAGGGCCGGCACGGTGCGACGGGCATC
GGGCCAGTGGCGAATCGGTCGGTCTTCCACCCGACC
>258_1_I_pugio pugio
GAACTTTATATTTGCTGTTGGCTTTGTGGTCTGGGCTTATTGGGTTGGCTTTGAGTTTAT
TAATTCGAGCTGAGTTAGGTCAGCCAGGTAGCTTATTAGGTGATGATCAATTATATAATG
TAATTGTGACAGCTCATGCTTTTATAATAATTTTTTTCTTGGTAATGCCAATGATGATTG
GTGGGTTTGGAAATTGGTTAATTCCGCTAATGATTGGAGCTCCTGATATGGCTTTTCCTC
GATTGAATAATTTAAGGTTTTGATTACTTGTGCCTGCTTTGTTTTTATTATTAAGGTCTT
CGTTAGTGGAAAGTGGTGTTGGGACTGGGTGAACTGTTTACCCTCCTCTATCTGGTAATG
TAGCACATTCTGGGGCTTCTGTTGATTTAGCAATTTTTTCATTACATCTTGCTGGTGCTT
CATCAATTTTGGGGGCTATTAATTTTATTTCTACTGTTGGTAATATGCGTTCTCCTGGTT
TAGTTGCTGAGCGAATTCCTTTATTTGTGTGAAGGGTTACTGTAACAGCTGTTTTATTGG
TTGCAGCTTTGCCTGTTCTAGCTGGTGCTATTACTATACTTCTTACTGATCGAAATTTAA
ATACTTCATTTTTTGATCCTACTGGTGGTGGTGATCCTATTTTGTATATACATTTGTTTT
TCGTCTTTTGCTTTTTT-AAATAAAAGATAATGCCTGCCCAGTGAATTTTAACGGCCGCG
TTAGCGTGAGCGTGCTAAGGTAGCGTAATAAATAGCCTTTTAATTGAAGGCCAGTGAATG
GCAAGACTAGGAATACCTCTACCAGAAAAAAAACTTTTCATCTGAGTGAAAAGACTCAGA
TACTAAGGAAGACGAAAAGACCCCGCGGAGCTTAACTTAATAAATTTTTAAAACAATAAA
ATTTTAAAAGTTTGATTGGGGCAATCTTGGAACAAAAATAACTTCCAATCTAATAAAAAA
ACATAAAAAGCTTACTAAGAACTATAAAGCAGCTACCCCGGGGATAACAGCGTTATCCAG
CTTGAGAGTACATATCGAAAGCCGGGTTTGCGACCTCGATGTTGGCTTAAGGGTATCCAC
ATTAGTGCAGCCGCTATGAAAGGATAGTCTGTTCGACTATTGCACCCTTATAAGCGGAGG
AAAAGAAACTAACAAGGATTCCCTCAGTAACGGCGAGTGAAGAGGGAAAAGCCCAGCACC
GAATCCCACAGCCTTGCGCTGTCGGGAACTGTGGTGTATAGGAAGCCTTCTTGCCAGCGT
GTTCGGGTTCCCAAGTCCTCCTGATCGTGGCCTTGCCCATAGCGGGTGTCAGGCCCGTCG
AGGCACCCGACGGCGCTGGCTTGGAGCTTCCTGGGAGTCGGGTTGTTTGGGAATGCAGCC
CAAAGGGGTGGTAAACTCCATCTAAGGCTAAATACGTTCACGAGTCCGATAGCAAACAAG
TACCGTGAGGGAAAGTTGAAAAGAACTTTGAAGAGAGAGTTCAAGAGTACGTGAAACCGC
TTAGAGGCAAACGGGTGGAACCGCAATGCGTCGACCCGGGGGATTCAGCCAGTAAATCGG
GACGGGCTTAGGCAGCGGAGCCGAAAAGCCCGCGCCTTTGCTTGGTCTCCGGGCGGACTG
GTGCACTTTCCTCGGGTTGATGGCCACGACCGGCTCTCCGCGGCCAGAAAGCTACGACCG
GGAAGGTGACCCACAGCCACGGTGTTATAGCCCGGCTAGCCTGA-GCGCTCGTCGGAGGG
CCGAGG-CGCCGCACGCCGCTACCCGCGCCATCCTTGCTCGTCACA--TGGGTTGGACTG
CTCCGTCAGTGCTAT-CCGACAGCGAGCGTAGGAAGGGCCGGCACGGTGCGACGGGCATC
GGGCCAGTGGCGAATCGGTCGGTCTTCCACCCGACC
>258_2_I_pugio pugio
GAACTTTATATTTGCTGTTGGCTTTGTGGTCTGGGCTTATTGGGTTGGCTTTGAGTTTAT
TAATTCGAGCTGAGTTAGGTCAGCCAGGTAGGTTATTAGGTGATGATCAATTATATAATG
TAATTGTGACAGCTCATGCTTTTATAATAATTTTTTTCTTGGTAATGCCAATGATGATTG
GTGGGTTTGGAAATTGGTTAATTCCGCTAATGATTGGAGCTCCTGATATGGCTTTTCCTC
GATTGAATAATTTAAGGTTTTGATTACTTGTGCCTGCTTTGTTTTTATTATTAAGGTCTT
CGTTAGTGGAAAGTGGTGTTGGGACTGGGTGAACTGTTTACCCTCCTCTATCTGGTAATG
TAGCACATTCTGGGGCTTCTGTTGATTTAGCAATTTTTTCATTACATCTTGCTGGTGCTT
CATCAATTTTGGGGGCTATTAATTTTATTTCTACTGTTGGTAATATGCGTTCTCCTGGTT
TAGTTGCTGAGCGAATTCCTTTATTTGTGTGAAGGGTTACTGTAACAGCTGTTTTATTGG
TTGCAGCTTTGCCTGTTCTAGCTGGTGCTATTACTATACTTCTTACTGATCGAAATTTAA
ATACTTCATTTTTTGATCCTACTGGTGGTGGTGATCCTATTTTGTATATACATTTGTTTT
TCGTCTTTTGCTTTTTT-AAATAAAAGATAATGCCTGCCCAGTGAATTTTAACGGCCGCG
TTAGCGTGAGCGTGCTAAGGTAGCGTAATAAATAGCCTTTTAATTGAAGGCCAGTGAATG
GCAAGACTAGGAATACCTCTACCAGAAAAAAAACTTTTCATCTGAGTGAAAAGACTCAGA
TACTAAGGAAGACGAAAAGACCCCGCGGAGCTTAACTTAATAAATTTTTAAAACAATAAA
ATTTTAAAAGTTTGATTGGGGCAATCTTGGAACAAAAATAACTTCCAATCTAATAAAAAA
ACATAAAAAGCTTACTAAGAACTATAAAGCAGCTACCCCGGGGATAACAGCGTTATCCAG
CTTGAGAGTACATATCGAAAGCCGGGTTTGCGACCTCGATGTTGGCTTAAGGGTATCCAC
ATTAGTGCAGCCGCTATGAAAGGATAGTCTGTTCGACTATTGCACCCTTATAAGCGGAGG
AAAAGAAACTAACAAGGATTCCCTCAGTAACGGCGAGTGAAGAGGGAAAAGCCCAGCACC
GAATCCCACAGCCTTGCGCTGTCGGGAACTGTGGTGTATAGGAAGCCTTCTTGCCAGCGT
GTTCGGGTTCCCAAGTCCTCCTGATCGTGGCCTTGCCCATAGCGGGTGTCAGGCCCGTCG
AGGCACCCGACGGCGCTGGCTTGGAGCTTCCTGGGAGTCGGGTTGTTTGGGAATGCAGCC
CAAAGGGGTGGTAAACTCCATCTAAGGCTAAATACGTTCACGAGTCCGATAGCAAACAAG
TACCGTGAGGGAAAGTTGAAAAGAACTTTGAAGAGAGAGTTCAAGAGTACGTGAAACCGC
TTAGAGGCAAACGGGTGGAACCGCAATGCGTCGACCCGGGGGATTCAGCCAGTAAATCGG
GACGGGCTTAGGCAGCGGAGCCGAAAAGCCCGCGCCTTTGCTTGGTCTCCGGGCGGACTG
GTGCACTTTCCTCGGGTTGATGGCCACGACCGGCTCTCCGCGGCCAGAAAGCTACGACCG
GGAAGGTGACCCACAGCCACGGTGTTATAGCCCGGCTAGCCTGA-GCGCTCGTCGGAGGG
CCGAGG-CGCCGCACGCCGCTACCCGCGCCATCCTTGCTCGTCACA--TGGGTTGGACTG
CTCCGTCAGTGCTAT-CCGACAGCGAGCGTAGGAAGGGCCGGCACGGTGCGACGGGCATC
GGGCCAGTGGCGAATCGGTCGGTCTTCCACCCGACC
>UA 20739 I pugio pugio
NNNCTTTATATTTGCTGTTGGCTTTGTGGTCTGGGCTTATTGGGTTGGCTTTGAGTTTAT
TAATTCGAGCTGAGTTAGGTCAGCCAGGTAGCTTATTAGGTGATGATCAATTATATAATG
TAATTGTGACAGCTCATGCTTTTATAATAATTTTTTTCTTGGTAATGCCAATGATGATTG
GTGGGTTTGGAAATTGGTTAATTCCGCTAATGATTGGAGCTCCTGATATGGCTTTTCCTC
GATTGAATAATTTAAGGTTTTGATTACTTGTGCCTGCTTTGTTTTTATTATTAAGGTCTT
CGTTAGTGGAAAGTGGTGTTGGGACTGGGTGAACTGTTTACCCTCCTTTATCTGGTAATG
TAGCACATTCTGGGGCTTCTGTTGATTTAGCAATTTTTTCATTACATCTTGCTGGTGCTT
CATCAATTTTGGGGGCTATTAATTTTATTTCTACTGTTGGTAATATGCGTTCTCCTGGTT
TAGTTGCTGAGCGAATTCCTTNATTTGTGTGAAGGGTTACTGTAACAGCTGTTTTATTGG
TTGCAGCTTTGCCTGTTCTAGCTGGTGCTATTACTATACTTCTTACTGATCGAAATTTAA
ATACTTCATTTTTTGATCCTACTGGTGNNNNNNNNNNNNNNNNNNNNNNNNNNNNNNNNN
NCGTCTTTTGCTTTTTT-AAATAAAAGATAATGCCTGCCCAGTGAATTTTAACGGCCGCG
TTAGCGTGAGCGTGCTAAGGTAGCGTAATAAATAGCCTTTTAATTGAAGGCCAGTGAATG
GCAAGACTAGGAATACCTCTACCAGAAAAAAAACTTTTCATCTGAGTGAAAAGACTCAGA
TACTAAGGAAGACGAAAAGACCCCGCGGAGCTTAACTTAATAAATTTTTAAAACAATAAA
ATTTTAAAAGTTTGATTGGGGCAATCTTGGAACAAAAATAACTTCCAATCTAATAAAAAA
ACATAAAAAGCTTACTAAGAACTATAAAGCAGCTACCCCGGGGATAACAGCGTTATCCAG
CTTGAGAGTACATATCGAAAGCCGGGTTTGCGACCTCGATGTTGGCTTAAGGGTATCCAC
ATTAGTGCAGCCGCTATGAAAGGATAGTCTGTTCGACTATTGCACCCTTNNNNNNNNNNN
NNNNNNNNNNNNNNNNNNNNNNNNNNNNNNNNNNNNNNNNNNNNNNNNNNNNNNNNNNNN
NNNNNNNNNNNNNNNNNNNNNNNNNNNNNNNNNNNNNNNNNNNNNNNNNNNNNNNNNNNN
NNNNNNNNNNNNNNNNNNNNNNNNNNNNNNNNNNNNNNNNNNNNNNNNNNNNNNNNNNNN
NNNNNNNNNNNNNNNNNNNNNNNNNNNNNNNNNNNNNNNNNNNNNNNNNNNNNNNNNNNN
NNNNNNNNNNNNNNNNNNNNNNNNNNNNNNNNNNNNNNNNNNNNNNNNNNNNNNNNNNNN
NNNNNNNNNNNNNNNNNNNNNNNNNNNNNNNNNNNNNNNNNNNNNNNNNNNNNNNNNNNN
TTAGAGGCAAACGGGTGGAACCGCAATGCGTCGACCCGGGGGATTCAGCCAGTAAATCGG
GACGGGCTTAGGCAGCGGAGCCGAAAAGCCCGCGCCTTTGCTTGGTCTCCGGGCGGACTG
GTGCACTTTCCTCGGGTTGATGGCCACGACCGGCTCTCCGCGGCCAGAAAGCTACGACCG
GGAAGGTGACCCACAGCCACGGTGTTATAGCCCGGCTAGCCTGA-GCGCTCGTCGGAGGG
CCGAGG-CGCCGCACGCCGCTACCCGCGCCATCCTTGCTCGTCACA--TGGGTTGGACTG
CTCCGTCAGTGCTAT-CCGACAGCGAGCGTAGGAAGGGCCGGCACGGTGCGACGGGCATC
GGGCCAGTGGCGAATCGGTCGGTCTTCCACCCGACC
>251_1_I_pugio_viridissima
GAACTTTATATTTGCTGTTGGCTTTGTGGTCTGGGCTGATTGGGTTGGCTTTGAGCCTAT
TAATTCGAGCTGAGTTAGGTCAGCCAGGTAGACTATTAGGTGATGATCAATTATATAATG
TAATTGTGACAGCTCATGCTTTTATAATAATTTTTTTCTTGGTAATGCCAATGATGATTG
GTGGGTTTGGAAATTGATTAATTCCGCTAATGATTGGAGCTCCTGATATGGCTTTTCCTC
GATTGAATAATTTAAGGTTTTGATTACTTGTGCCTGCTTTGTTTTTATTATTAAGGTCTT
CGTTAGTGGAGAGTGGTGTTGGGACTGGGTGGACTGTTTACCCTCCTTTATCTGGTAATG
TGGCACATTCTGGGGCTTCTGTTGATTTAGCCATTTTTTCATTACATCTTGCTGGTGCTT
CATCAATTTTGGGGGCTATTAATTTTATTTCTACTGTTGGTAATATGCGTTCTCCTGGTT
TAGTTGCTGAGCGAATTCCTTTATTTGTGTGAAGGGTTACTGTGACAGCTGTTTTATTGG
TTGCAGCTTTGCCTGTTTTAGCTGGTGCTATTACTATACTTCTTACTGATCGAAACTTAA
ATACTTCATTTTTTGATCCTACTGGTGGTGGTGATCCTATTTTGTATATACATTTGTTTT
TCGTCTTTTGCTTTTTT-AAATAAAAGATAATGCCTGCCCAGTGAATTTTAACGGCCGCG
TTAGCGTGAGCGTGCTAAGGTAGCGTAATAAATAGCCTTTTAATTGAAGGCCAGTGAATG
GCAAGACTAGGAATACCTCTACCAGAAAAAAAACTTTTCATCTGAGTGAAAAGACTCAGA
TACTAAGGAAGACGAAAAGACCCCGCGGAGCTTAACTTAATAAATTTTTAAAACAATAAA
ATTTTAAAAGTTTGATTGGGGCAATCTTGGAACAAAAATAACTTCCAATCTAATACAAAA
ACATAAAAAGCTTACTAAGAACTATAAAGCAGCTACCCCGGGGATAACAGCGTTATCCAG
CTTGAGAGTACATATCGAAAGCCGGGTTTGCGACCTCGATGTTGGCTTAAGGGTATCCAC
ATTAGTGCAGCCGCTATGAAAGGATAGTCTGTTCGACTATTGCACCCTTATAAGCGGAGG
AAAAGAAACTAACAAGGATTCCCTCAGTAACGGCGAGTGAAGAGGGAAAAGCCCAGCACC
GAATCCCACAGCCTTGCGCTGTCGGGAACTGTGGTGTATAGGAAGCCTTCTTGCCAGCGT
GTTCGGGTTCCCAAGTCCTCCTGATCGTGGCCTTGCCCATAGCGGGTGTCAGGCCCGTCG
AGGCACCCGACGGCGCTGGCTTGGAGCTTCCTGGGAGTCGGGTTGTTTGGGAATGCAGCC
CAAAGGGGTGGTAAACTCCATCTAAGGCTAAATACGTTCACGAGTCCGATAGCAAACAAG
TACCGTGAGGGAAAGTTGAAAAGAACTTTGAAGAGAGAGTTCAAGAGTACGTGAAACCGC
TTAGAGGCAAACGGGTGGAACCGCAATGCGTCGACCCGGGGGATTCAGCCAGTAAATCGG
GACGGGCTTAGGCAGCGGAGCCGAAAAGCCCGCGCCTTTGCTTGGTCTCCGGGCGGACTG
GTGCACTTTCCTCGGGTTGATGGCCACGACCGGCTCTCCGCGGCCAGAAAGCTACGACCG
GGAAGGTGACCCACAGCCACGGTGTTATAGCCCGGCTAGCCTGA-GCGCTCGTCGGAGGG
CCGAGG-CGCCGCACGCCGCTACCCGCGCCATCCTTGCTCGTCACA--TGGGTTGGACTG
CTCCGTCAGTGCTAT-CCGACAGCGAGCGTAGGAAGGGCCGGCACGGTGCGACGGGCATC
GGGCCAGTGGCGAATCGGTCGGTCTTCCACCCGACC
>371_3_I_pugio_viridissima
GAACTTTATATTTGCTGTTGGCTTTGTGGTCTGGGCTGATTGGGTTGGCTTTGAGCCTAT
TAATTCGAGCTGAGTTAGGTCAGCCAGGTAGACTATTAGGTGATGATCAATTATATAATG
TAATTGTGACAGCTCATGCTTTTATAATAATTTTTTTCTTGGTAATGCCAATGATGATTG
GTGGGTTTGGAAATTGATTAATTCCGCTAATGATTGGAGCTCCTGATATGGCTTTTCCTC
GATTGAATAATTTAAGGTTTTGATTACTTGTGCCTGCTTTGTTTTTATTATTAAGGTCTT
CGTTAGTGGAGAGTGGTGTTGGGACTGGGTGGACTGTTTACCCTCCTTTATCTGGTAATG
TGGCACATTCTGGGGCTTCTGTTGATTTAGCCATTTTTTCATTACATCTTGCTGGTGCTT
CATCAATTTTGGGGGCTATTAATTTTATTTCTACTGTTGGTAATATGCGTTCTCCTGGTT
TAGTTGCTGAGCGAATTCCTTTATTTGTGTGAAGGGTTACTGTAACAGCTGTTTTATTGG
TTGCAGCTTTGCCTGTTTTAGCTGGTGCTATTACTATACTTCTTACTGATCGAAACTTAA
ATACTTCATTTTTTGATCCTACTGGTGGTGGTGATCCTATTTTGTATATACATTTGTTTT
NNNNNNNNNNNNNNNNNNNNNNNNNNNNNNNNNNNNNNNNNNNNNNNNNNNNNNNNNNNN
NNNNNNNNNNNNNNNNNNNNNNNNNNNNNNNNNNNNNNNNNNNNNNNNNNNNNNNNNNNN
NNNNNNNNNNNNNNNNNNNNNNNNNNNNNNNNNNNNNNNNNNNNNNNNNNNNNNNNNNNN
NNNNNNNNNNNNNNNNNNNNNNNNNNNNNNNNNNNNNNNNNNNNNNNNNNNNNNNNNNNN
NNNNNNNNNNNNNNNNNNNNNNNNNNNNNNNNNNNNNNNNNNNNNNNNNNNNNNNNNNNN
NNNNNNNNNNNNNNNNNNNNNNNNNNNNNNNNNNNNNNNNNNNNNNNNNNNNNNNNNNNN
NNNNNNNNNNNNNNNNNNNNNNNNNNNNNNNNNNNNNNNNNNNNNNNNNNNNNNNNNNNN
NNNNNNNNNNNNNNNNNNNNNNNNNNNNNNNNNNNNNNNNNNNNNNNNNNNNNNNNNNNN
NNNNNNNNNNNNNNNNNNNNNNNNNNNNNNNNNNNNNNNNNNNNNNNNNNNNNNNNNNNN
NNNNNNNNNNNNNNNNNNNNNNNNNNNNNNNNNNNNNNNNNNNNNNNNNNNNNNNNNNNN
NNNNNNNNNNNNNNNNNNNNNNNNNNNNNNNNNNNNNNNNNNNNNNNNNNNNNNNNNNNN
NNNNNNNNNNNNNNNNNNNNNNNNNNNNNNNNNNNNNNNNNNNNNNNNNNNNNNNNNNNN
NNNNNNNNNNNNNNNNNNNNNNNNNNNNNNNNNNNNNNNNNNNNNNNNNNNNNNNNNNNN
NNNNNNNNNNNNNNNNNNNNNNNNNNNNNNNNNNNNNNNNNNNNNNNNNNNNNNNNNNNN
NNNNNNNNNNNNNNNNNNNNNNNNNNNNNNNNNNNNNNNNNNNNNNNNNNNNNNNNNNNN
NNNNNNNNNNNNNNNNNNNNNNNNNNNNNNNNNNNNNNNNNNNNNNNNNNNNNNNNNNNN
NNNNNNNNNNNNNNNNNNNNNNNNNNNNNNNNNNNNNNNNNNNNNNNNNNNNNNNNNNNN
NNNNNNNNNNNNNNNNNNNNNNNNNNNNNNNNNNNNNNNNNNNNNNNNNNNNNNNNNNNN
NNNNNNNNNNNNNNNNNNNNNNNNNNNNNNNNNNNNNNNNNNNNNNNNNNNNNNNNNNNN
NNNNNNNNNNNNNNNNNNNNNNNNNNNNNNNNNNNNNNNNNNNNNNNNNNNNNNNNNNNN
NNNNNNNNNNNNNNNNNNNNNNNNNNNNNNNNNNNN
>381_3_I_pugio_viridissima
GAACTTTATATTTGCTGTTGGCTTTGTGGTCTGGGCTGATTGGGTTGGCTTTGAGCCTAT
TAATTCGAGCTGAGTTAGGTCAGCCAGGTAGACTATTAGGTGATGATCAATTATATAATG
TAATTGTGACAGCTCATGCTTTTATAATAATCTTTTTCTTGGTAATGCCAATGATGATTG
GTGGGTTTGGAAATTGATTAATTCCGCTAATGATTGGAGCTCCTGATATGGCTTTTCCTC
GATTGAATAATTTAAGGTTTTGATTACTTGTGCCTGCTTTGTTTTTATTATTAAGGTCTT
CGTTAGTGGAGAGTGGTGTTGGGACTGGGTGGACTGTTTACCCTCCTTTATCTGGTAATG
TGGCACATTCTGGGGCTTCTGTTGATTTAGCCATTTTTTCATTACATCTTGCTGGTGCTT
CATCAATTTTGGGGGCTATTAATTTTATTTCTACTGTTGGTAATATGCGTTCTCCTGGTT
TAGTTGCTGAGCGAATTCCTTTATTTGTGTGAAGGGTTACTGTAACAGCTGTTTTATTGG
TTGCAGCTTTGCCTGTTTTAGCTGGTGCTATTACTATACTTCTTACTGATCGAAACTTAA
ATACTTCATTTTTTGATCCTACTGGTGGTGGTGATCCTATTTTGTATATACATTTGTTTT
NNNNNNNNNNNNNNNNNNNNNNNNNNNNNNNNNNNNNNNNNNNNNNNNNNNNNNNNNNNN
NNNNNNNNNNNNNNNNNNNNNNNNNNNNNNNNNNNNNNNNNNNNNNNNNNNNNNNNNNNN
NNNNNNNNNNNNNNNNNNNNNNNNNNNNNNNNNNNNNNNNNNNNNNNNNNNNNNNNNNNN
NNNNNNNNNNNNNNNNNNNNNNNNNNNNNNNNNNNNNNNNNNNNNNNNNNNNNNNNNNNN
NNNNNNNNNNNNNNNNNNNNNNNNNNNNNNNNNNNNNNNNNNNNNNNNNNNNNNNNNNNN
NNNNNNNNNNNNNNNNNNNNNNNNNNNNNNNNNNNNNNNNNNNNNNNNNNNNNNNNNNNN
NNNNNNNNNNNNNNNNNNNNNNNNNNNNNNNNNNNNNNNNNNNNNNNNNNNNNNNNNNNN
NNNNNNNNNNNNNNNNNNNNNNNNNNNNNNNNNNNNNNNNNNNNNNNNNNNNNNNNNNNN
NNNNNNNNNNNNNNNNNNNNNNNNNNNNNNNNNNNNNNNNNNNNNNNNNNNNNNNNNNNN
NNNNNNNNNNNNNNNNNNNNNNNNNNNNNNNNNNNNNNNNNNNNNNNNNNNNNNNNNNNN
NNNNNNNNNNNNNNNNNNNNNNNNNNNNNNNNNNNNNNNNNNNNNNNNNNNNNNNNNNNN
NNNNNNNNNNNNNNNNNNNNNNNNNNNNNNNNNNNNNNNNNNNNNNNNNNNNNNNNNNNN
NNNNNNNNNNNNNNNNNNNNNNNNNNNNNNNNNNNNNNNNNNNNNNNNNNNNNNNNNNNN
NNNNNNNNNNNNNNNNNNNNNNNNNNNNNNNNNNNNNNNNNNNNNNNNNNNNNNNNNNNN
NNNNNNNNNNNNNNNNNNNNNNNNNNNNNNNNNNNNNNNNNNNNNNNNNNNNNNNNNNNN
NNNNNNNNNNNNNNNNNNNNNNNNNNNNNNNNNNNNNNNNNNNNNNNNNNNNNNNNNNNN
NNNNNNNNNNNNNNNNNNNNNNNNNNNNNNNNNNNNNNNNNNNNNNNNNNNNNNNNNNNN
NNNNNNNNNNNNNNNNNNNNNNNNNNNNNNNNNNNNNNNNNNNNNNNNNNNNNNNNNNNN
NNNNNNNNNNNNNNNNNNNNNNNNNNNNNNNNNNNNNNNNNNNNNNNNNNNNNNNNNNNN
NNNNNNNNNNNNNNNNNNNNNNNNNNNNNNNNNNNNNNNNNNNNNNNNNNNNNNNNNNNN
NNNNNNNNNNNNNNNNNNNNNNNNNNNNNNNNNNNN
>147_3_I_pugio_daweiensis
GAACTTTATATTTGCTGTTGGCTTTGTGGTCTGGGCTGATTGGGTTGGCTTTGAGCTTAT
TAATTCGAGCTGAGTTAGGTCAGCCGGGTAGACTATTAGGTGATGATCAGTTATATAATG
TAATTGTGACAGCTCATGCTTTTATAATAATTTTTTTCTTGGTAATGCCAATGATGATTG
GTGGGTTTGGAAATTGGTTAATTCCGCTAATGATTGGAGCTCCTGATATGGCTTTTCCTC
GATTGAATAATTTAAGGTTTTGATTACTTGTGCCTGCTTTGTTTTTATTATTAAGGTCTT
CGTTAGTGGAGAGTGGTGTTGGGACTGGGTGGACTGTTTACCCTCCATTATCTGGTAATG
TGGCACATTCTGGGGCTTCTGTTGATTTAGCCATTTTTTCACTACATCTTGCTGGTGCTT
CATCAATTTTGGGGGCTATTAATTTTATTTCTACTGTTGGTAATATGCGTTCTCCTGGTT
TAGTTGCTGAGCGAATTCCTTTATTTGTGTGAAGGGTTACTGTAACAGCTGTTTTATTGG
TTGCAGCTTTGCCTGTCTTAGCTGGTGCTATTACTATACTTCTTACTGATCGAAACTTAA
ATACTTCATTTTTTGATCCTACTGGTGGTGGTGACCCTATTTTATATATACATTTGTTCT
TCGTCTTTTGCTTTTTA-AAATAAAAGATAATGCCTGCCCAGTGAATTTTAACGGCCGCG
TTAGCGTGAGCGTGCTAAGGTAGCGTAATAAATAGCCTTTTAATTGAAGGCCAGTGAATG
GCAAGACTAGGAATACCTCTACCAGAAAAAAAACTTTTCATCTGAGTGAAAAGACTCAGA
TACTAAGGAAGACGAAAAGACCCCGCGGAGCTTAACTTAATAAATTTTTAAAACAATAAA
ATTTTAAAAGTTTGATTGGGGCAATCTTGGAACAAAAATAACTTCCAATCTAACACAAAA
TCATAAAAAGCTTACTAAGAACTATAAAGCAGCTACCCCGGGGATAACAGCGTTATCCAG
CTTGAGAGTACATATCGAAAGCCGGGTTTGCGACCTCGATGTTGGCTTAAGGGTATCCAC
ATTAGTGCAGCCGCTATGAAAGGATAGTCTGTTCGACTATTGCACCCTTATAAGCGGAGG
AAAAGAAACTAACAAGGATTCCCTCAGTAACGGCGAGTGAAGAGGGAAAAGCCCAGCACC
GAATCCCACAGCCTTGCGCTGTCGGGAACTGTGGTGTATAGGAAGCCTTCTTGCCAGCGT
GTTCGGGTTCCCAAGTCCTCCTGATCGTGGCCTTGCCCATAGCGGGTGTCAGGCCCGTCG
AGGCACCCGACGGCGCTGGCTTGGAGCTTCCTGGGAGTCGGGTTGTTTGGGAATGCAGCC
CAAAGGGGTGGTAAACTCCATCTAAGGCTAAATACGTTCACGAGTCCGATAGCAAACAAG
TACCGTGAGGGAAAGTTGAAAAGAACTTTGAAGAGAGAGTTCAAGAGTACGTGAAACCGC
TTAGAGGCAAACGGGTGGAACCGCAATGCGTCGACCCGGGGGATTCAGCCAGTAAATCGG
GACGGGCTTAGGCAGCGGAGCCGAAAAGCCCGCGCCTTTGCTTGGTCTCCGGGCGGACTG
GTGCACTTTCCTCGGGTTGATGGCCACGACCGGCTCTCCGCGGCCAGAAAGCTACGACCG
GGAAGGTGACCCACAGCCACGGTGTTATAGCCCGGCTAGCCTGA-GCGCTCGTCGGAGGG
CCGAGG-CGCCGCACGCCGCTACCCGCGCCATCCTTGCTCCACA----TGGGTTGGACTG
CTCCGTCAGTGCTAT-CCGACAGCGAGCGTAGGAAGGGCCGGCACGGTGCGACAGGCATC
GGGCCAGTGGCGAATCGGTCGGTCTTCCNNNNNNNN
>148_7_I_pugio_daweiensis
GAACTTTATATTTGCTGTTGGCTTTGTGGTCTGGGCTGATTGGGTTGGCTTTGAGCTTAT
TAATTCGAGCTGAGTTAGGTCAGCCGGGTAGACTATTAGGTGATGATCAGTTATATAATG
TAATTGTGACAGCTCATGCTTTTATAATAATTTTTTTCTTGGTAATGCCAATGATGATTG
GTGGGTTTGGAAATTGGTTAATTCCGTTAATGATTGGAGCTCCTGATATGGCTTTTCCTC
GATTGAATAATTTAAGGTTTTGATTACTTGTGCCTGCTTTGTTTTTATTATTAAGGTCTT
CGTTAGTGGAGAGTGGTGTTGGGACTGGGTGGACTGTTTACCCTCCATTATCTGGTAATG
TGGCACATTCTGGGGCTTCTGTTGATTTAGCCATTTTTTCACTACATCTTGCTGGTGCTT
CATCAATTTTGGGGGCTATTAATTTTATTTCTACTGTTGGTAATATGCGTTCTCCTGGTT
TAGTTGCTGAGCGAATTCCTTTATTTGTGTGAAGGGTTACTGTAACAGCTGTTTTATTGG
TTGCAGCTTTGCCTGTCTTAGCTGGTGCTATTACTATACTTCTTACTGATCGAAACTTAA
ATACTTCATTTTTTGATCCTACTGGTGGTGGTGACCCTATTTTATATATACATTTGTTCT
TCGTCTTTTGCTTTTTA-AAATAAAAGATAATGCCTGCCCAGTGAATTTTAACGGCCGCG
TTAGCGTGAGCGTGCTAAGGTAGCGTAATAAATAGCCTTTTAATTGAAGGCCAGTGAATG
GCAAGACTAGGAATACCTCTACCAGAAAAAAAACTTTTCATCTGAGTGAAAAGACTCAGA
TACTAAGGAAGACGAAAAGACCCCGCGGAGCTTAACTTAATAAATTTTTAAAACAATAAA
ATTTTAAAAGTTTGATTGGGGCAATCTTGGAACAAAAATAACTTCCAATCTAACACAAAA
TCATAAAAAGCTTACTAAGAACTATAAAGCAGCTACCCCGGGGATAACAGCGTTATCCAG
CTTGAGAGTACATATCGAAAGCCGGGTTTGCGACCTCGATGTTGGCTTAAGGGTATCCAC
ATTAGTGCAGCCGCTATGAAAGGATAGTCTGTTCGACTATTGCACCCTTATAAGCGGAGG
AAAAGAAACTAACAAGGATTCCCTCAGTAACGGCGAGTGAAGAGGGAAAAGCCCAGCACC
GAATCCCACAGCCTTGCGCTGTCGGGAACTGTGGTGTATAGGAAGCCTTCTTGCCAGCGT
GTTCGGGTTCCCAAGTCCTCCTGATCGTGGCCTTGCCCATAGCGGGTGTCAGGCCCGTCG
AGGCACCCGACGGCGCTGGCTTGGAGCTTCCTGGGAGTCGGGTTGTTTGGGAATGCAGCC
CAAAGGGGTGGTAAACTCCATCTAAGGCTAAATACGTTCACGAGTCCGATAGCAAACAAG
TACCGTGAGGGAAAGTTGAAAAGAACTTTGAAGAGAGAGTTCAAGAGTACGTGAAACCGC
TTAGAGGCAAACGGGTGGAACCGCAATGCGTCGACCCGGGGGATTCAGCCAGTAAATCGG
GACGGGCTTAGGCAGCGGAGCCGAAAAGCCCGCGCCTTTGCTTGGTCTCCGGGCGGACTG
GTGCACTTTCCTCGGGTTGATGGCCACGACCGGCTCTCCGCGGCCAGAAAGCTACGACCG
GGAAGGTGACCCACAGCCACGGTGTTATAGCCCGGCTAGCCTGA-GCGCTCGTCGGAGGG
CCGAGG-CGCCGCACGCCGCTACCCGCGCCATCCTTGCTCGTCACA--TGGGTTGGACTG
CTCCGTCAGTGCTAT-CCGACAGCGAGCGTAGGAAGGGCCGGCACGGTGCGACAGGCATC
GGGCCAGTGGCGAATCGGTCGGTCTTCCNNNNNNNN
>148_15_I_pugio_daweiensis
GAACTTTATATTTGCTGTTGGCTTTGTGGTCTGGGCTGATTGGGTTGGCTTTGAGCTTAT
TAATTCGAGCTGAGTTAGGTCAGCCGGGTAGACTATTAGGTGATGATCAGTTATATAATG
TAATTGTGACAGCTCATGCTTTTATAATAATTTTTTTCTTGGTAATGCCAATGATGATTG
GTGGGTTTGGAAATTGGTTAATTCCGCTAATGATTGGAGCTCCTGATATGGCTTTTCCTC
GATTGAATAATTTAAGGTTTTGATTACTTGTGCCTGCTTTGTTTTTATTATTAAGGTCTT
CGTTAGTGGAGAGTGGTGTTGGGACTGGGTGGACTGTTTACCCTCCATTATCTGGTAATG
TGGCACATTCTGGGGCTTCTGTTGATTTAGCCATTTTTTCACTACATCTTGCTGGTGCTT
CATCAATTTTGGGGGCTATTAATTTTATTTCTACTGTTGGTAATATGCGTTCTCCTGGTT
TAGTTGCTGAGCGAATTCCTTTATTTGTGTGAAGGGTTACTGTAACAGCTGTTTTATTGG
TTGCGGCTTTGCCTGTCTTAGCTGGTGCTATTACTATACTTCTTACTGATCGAAACTTAA
ATACTTCATTTTTTGATCCTACTGGTGGTGGTGACCCTATTTTATATATACATTTGTTCT
TCGTCTTTTGCTTTTTA-AAATAAAAGATAATGCCTGCCCAGTGAATTTTAACGGCCGCG
TTAGCGTGAGCGTGCTAAGGTAGCGTAATAAATAGCCTTTTAATTGAAGGCCAGTGAATG
GCAAGACTAGGAATACCTCTACCAGAAAAAAAACTTTTCATCTGAGTGAAAAGATTCAGA
TACTAAGGAAGACGAAAAGACCCCGCGGAGCTTAACTTAATAAATTTTTAAAACAATAAA
ATTTTAAAAGTTTGATTGGGGCAATCTTGGAACAAAAATAACTTCCAATCTAACACAAAA
TCATAAAAAGCTTACTAAGAACTATAAAGCAGCTACCCCGGGGATAACAGCGTTATCCAG
CTTGAGAGTACATATCGAAAGCCGGGTTTGCGACCTCGATGTTGGCTTAAGGGTATCCAC
ATTAGTGCAGCCGCTATGAAAGGATAGTCTGTTCGACTATTGCACCCTTATAAGCGGAGG
AAAAGAAACTAACAAGGATTCCCTCAGTAACGGCGAGTGAAGAGGGAAAAGCCCAGCACC
GAATCCCACAGCCTTGCGCTGTCGGGAACTGTGGTGTATAGGAAGCCTTCTTGCCAGCGT
GTTCGGGTTCCCAAGTCCTCCTGATCGTGGCCTTGCCCATAGCGGGTGTCAGGCCCGTCG
AGGCACCCGACGGCGCTGGCTTGGAGCTTCCTGGGAGTCGGGTTGTTTGGGAATGCAGCC
CAAAGGGGTGGTAAACTCCATCTAAGGCTAAATACGTTCACGAGTCCGATAGCAAACAAG
TACCGTGAGGGAAAGTTGAAAAGAACTTTGAAGAGAGAGTTCAAGAGTACGTGAAACCGC
TTAGAGGCAAACGGGTGGAACCGCAATGCGTCGACCCGGGGGATTCAGCCAGTAAATCGG
GACGGGCTTAGGCAGCGGAGCCGAAAAGCCCGCGCCTTTGCTTGGTCTCCGGGCGGACTG
GTGCACTTTCCTCGGGTTGATGGCCACGACCGGCTCTCCGCGGCCAGAAAGCTACGACCG
GGAAGGTGACCCACAGCCACGGTGTTATAGCCCGGCTAGCCTGA-GCGCTCGTCGGAGGG
CCGAGG-CGCCGCACGCCGCTACCCGCGCCATCCTTGCTCGTCACA--TGGGTTGGACTG
CTCCGTCAGTGCTAT-CCGACAGCGAGCGTAGGAAGGGCCGGCACGGTGCGACAGGCATC
GGGCCAGTGGCGAATCGGTCGGTCTTCCNNNNNNNN
>361_1_I_pugio_paradoxa
GAACTTTGTATTTGCTGTTGGCTTTGTGGTCTGGGCTGATTGGGTTGGCTTTGAGCTTAT
TAATTCGAGCTGAGTTAGGTCAGCCAGGTAGATTATTAGGTGATGATCAATTATATAATG
TAATTGTGACAGCTCATGCTTTTATAATAATTTTTTTCTTGGTAATGCCAATGATGATTG
GTGGGTTTGGAAATTGATTAATTCCGCTAATGATTGGAGCTCCTGATATGGCTTTTCCTC
GATTGAATAATTTAAGGTTTTGATTACTTGTGCCTGCTTTGTTTTTATTACTAAGGTCTT
CGTTAGTGGAGAGTGGTGTTGGGACTGGGTGGACTGTTTATCCTCCTTTATCTGGTAATG
TGGCACATTCTGGGGCTTCTGTTGATTTAGCAATTTTTTCATTGCATCTTGCTGGTGCTT
CATCAATTTTGGGGGCTATTAACTTTATTTCTACTGTTGGTAATATGCGTTCTCCTGGTT
TAGTTGCTGAGCGAATTCCTTTATTTGTGTGAAGGGTTACTGTAACAGCTGTTTTATTGG
TTGCAGCTTTGCCTGTTTTAGCTGGTGCTATTACTATACTTCTTACTGATCGAAATTTAA
ATACTTCGTTTTTTGATCCTACTGGTGGTGGTGATCCTATTTTGTATATACATTTGTTTT
TCGTCTTTTGCTTTTTT-AAATAAAAGATAATGCCTGCCCAGTGAATTTTAACGGCCGCG
TTAGCGTGAGCGTGCTAAGGTAGCGTAATAAATAGCCTTTTAATTGAAGGCCAGTGAATG
GCAAGACTAGGAATACCTCTACCAGAAAAAAAACTTTTCATCTGAGTGAAAAGACTCAGA
TACTAAGGAAGACGAAAAGACCCCGCGGAGCTTAACTTAATAAATTTTTAAAACAATAAA
ATTTTAAAAGTTTGATTGGGGCAATCTTGGAACAAAAATAACTTCCAATCTAATACAAAA
ACATGAAAAGCTTACTAAGAACTATAAAGCAGCTACCCCGGGGATAACAGCGTTATCCAG
CTTGAGAGTACATATCGAAAGCCGGGTTTGCGACCTCGATGTTGGCTTAAGGGTATCCAC
ATTAGTGCAGCCGCTATGAAAGGATAGTCTGTTCGACTATTGCACCCTTATAAGCGGAGG
AAAAGAAACTAACAAGGATTCCCTCAGTAACGGCGAGTGAAGAGGGAAAAGCCCAGCACC
GAATCCCACAGCCTTGCGCTGTCGGGAACTGTGGTGTATAGGAAGCCTTCTTGCCAGCGT
GTTCGGGTTCCCAAGTCCTCCTGATCGTGGCCTTGCCCATAGCGGGTGTCAGGCCCGTCG
AGGCACCCGACGGCGCTGGCTTGGAGCTTCCTGGGAGTCGGGTTGTTTGGGAATGCAGCC
CAAAGGGGTGGTAAACTCCATCTAAGGCTAAATACGTTCACGAGTCCGATAGCAAACAAG
TACCGTGAGGGAAAGTTGAAAAGAACTTTGAAGAGAGAGTTCAAGAGTACGTGAAACCGC
TTAGAGGCAAACGGGTGGAACCGCAATGCGTCGACCCGGGGGATTCAGCCAGTAAATCGG
GACGGGCTTAGGCAGCGGAGCCGAAAAGCCCGCGCCTTTGCTTGGTCTCCGGGCGGACCG
GTGCACTTTCCTCGGGTTGATGGCCACGACCGGCTCTCCGCGGCCAGAAAGCTACGACCG
GGAAGGTGACCCACAGCCACGGTGTTATAGCCCGGCTAGCCTGA-GCGCTCGTCGGAGGG
CCGAGG-CGCCGCACGCCGCTACCCGCGCCATCCTTGCTCGTCACA--TGGGTTGGACTG
CTCCGTCAGTGCTAT-CCGACAGCGAGCGTAGGAAGGGCCGGCACGGTGCGACGGGCATC
GGGCCGGTGGCGAATCGGTCGGTCTTCCACCCGACC
