# Supplementary material for: Follow the Footsteps of Leonardo Fea: An Example of an Integrative Revision of Freshwater Mussel Taxa Described from the Former British Burma (Myanmar)
Source: Hindawi journal article supplement (doi:10.1155/2022/6600359), 2022-05-27
Supplement: f1 [file 6600359.f1.zip › Alignment S2.fasta]

>JX497731_M_laosensis
GGACTTTGTATTTGTTGTTAGCTCTGTGGTCTGGGCTTATTGGGTTGGCTTTGAGATTGT
TAATTCGTGCTGAATTGGGTCAGCCTGGTAGGCTGTTGGGGGACGATCAATTGTATAATG
TTATTGTGACGGCACATGCTTTTATAATGATTTTCTTTTTGGTGATGCCTATGATAATTG
GTGGCTTTGGAAATTGGCTTATTCCCCTTATGATTGGGGCTCCTGATATGGCTTTCCCCC
GACTTAATAATTTGAGGTTTTGGTTACTTGTACCTGCTTTGTTTTTGTTGTTGAGTTCTT
CTTTAGTGGAGAGTGGTGTAGGTACAGGTTGGACTGTCTATCCACCTTTGTCAAGAAATG
TGTCTCATTCGGGGGCTTCTGTTGATTTAGCTATTTTTTCTTTGCATCTTGCGGGTGCTT
CTTCTATTCTTGGGGCCATTAATTTTATTTCGACTGTCGGTAATATGCGTTCACCTGGTG
TGGTTGCTGAGCGAATTCCTTTGTTTGTGTGGGCTGTTACCGTGACAGCTATTTTGTTAG
TGGCGGCGTTACCTGTTTTGGCGGGGGCTATTACTATGTTGTTGACTGATCGTAATTTGA
ACACGTCTTTTTTTGACCCTACCGGGGGGGGTGATCCCATTTTATACATGCATTTGTTTT

>KJ161516_M_daurica
GGACTTTGTATTTATTGTTGGCTCTATGGTCTGGTCTTATTGGTTTGGCTTTGAGGTTAT
TGATTCGTGCTGAGTTGGGTCAACCCGGTAGTTTGTTGGGGGATGATCAGTTGTACAATG
TTATTGTTACGGCCCATGCTTTTATAATAATTTTCTTTTTGGTTATGCCAATAATAATTG
GTGGTTTTGGTAATTGGCTTATTCCGCTTATGATTGGGGCTCCCGATATGGCTTTTCCTC
GGCTTAATAATTTGAGGTTTTGGCTACTTGTGCCGGCTCTTTTTCTGTTACTGAGCTCTT
CTTTAGTGGAGAGTGGTGTTGGTACTGGGTGGACTGTTTATCCACCTTTGTCAAGGAATG
TTTCTCATTCTGGGGCTTCTGTAGATTTGGCTATTTTTTCTTTACATCTTGCCGGTGCGT
CTTCTATTTTGGGGGCTATTAATTTTATTTCTACTGTTGGTAATATACGCTCTCCGGGTG
TGGTTGCTGAGCGGATTCCTTTGTTTGTGTGAGCTGTCACCGTGACAGCTGTTTTGTTAG
TGGCGGCACTGCCAGTTTTGGCAGGGGCTATTACTATACTATTAACTGACCGTAATTTAA
ATACATCTTTTTTTGACCCGACGGGTGGAGGTGATCCCATTTTGTATATGCACTTGTTTT

>biv_652_1_P_rakhinensis
GAACTTTGTATTTGCTGTTAGCCTTGTGGTCTGGGTTAATTGGGTTAGCTTTAAGGCTTT
TGATTCGAGCTGAGTTAGGTCAGCCTGGGAGGTTATTAGGGGATGATCAGCTTTATAATG
TAATTGTGACGGCTCATGCTTTTATGATAATTTTCTTTTTAGTTATGCCAATGATGATTG
GGGGATTTGGTAATTGGTTAATTCCTTTAATGATTGGGGCTCCTGATATGGCTTTCCCTC
GATTAAATAATTTGAGATTTTGGTTGCTTGTGCCAGCTTTATTCTTGTTGCTGAGGTCTT
CTTTGGTGGAAAGGGGTGTTGGGACTGGATGGACGGTTTATCCCCCTTTGTCTGGGAATG
TGGCTCATTCGGGAGCTTCTGTTGATTTGGCAATTTTTTCTTTACACCTTGCCGGTGCTT
CTTCCATTCTGGGGGCTATTAACTTTATTTCAACTGTCGGTAATATGCGGTCTCCGGGCT
TGGTGGCTGAGCGTATTCCTTTATTTGTGTGAAGGGTAACTGTGACTGCTGTGTTGTTAG
TGGCCGCTTTGCCTGTACTAGCCGGTGCTATTACTATATTACTTACTGATCGTAATTTAA
ATACATCATTTTTTGACCCTACGGGGGGAGGTGATCCTATTTTATATATGCATTTGTTTT

>KP795022_L_olivacea
NNNCTTTATATTTATTGTTGGCTTTGTGATCTGGGTTAATTGGATTGGCTTTGAGGCTTT
TAATTCGAGCTGAGTTAGGTCAACCTGGTAGGTTATTAGGTGATGATCAGCTATATAATG
TTATTGTTACGGCTCATGCTTTTATAATAATTTTCTTTTTGGTGATGCCAATAATAATTG
GAGGGTTTGGTAATTGATTAATTCCTTTGATGATTGGGGCTCCTGATATGGCTTTTCCTC
GTTTAAATAATTTAAGGTTTTGATTACTTGTACCTGCTTTATTTTTACTTTTAAGGTCTT
CTTTAGTAGAGAGTGGTGTTGGAACTGGCTGGACTGTCTATCCTCCTTTATCTGGAAACG
TGGCACATTCTGGGGCCTCTGTGGATTTGGCTATTTTCTCTTTACATCTTGCCGGTGCTT
CTTCTATTTTAGGGGCTATTAATTTCATTTCTACTGTTGGAAATATACGATCTCCTGGAT
TAGTGGCTGAGCGAATTCCATTGTTTGTTTGAAGAGTTACTGTGACAGCTGTTTTATTAG
TAGCTGCTTTACCAGTTTTAGCTGGTGCTATTACTATGCTTCTTACCGATCGTAATTTGA
ATACGTCATTTTTTGATCCGACTGGTGNNNNNNNNNNNNNNNNNNNNNNNNNNNNNNNNN

>biv_149_L_tavoyensis
GAACTTTATATTTATTGTTGGCTTTATGGTCTGGATTAATTGGGTTGGCTCTGAGGCTTT
TAATCCGAGCTGAGTTGGGTCAACCTGGTAGGTTATTGGGTGATGATCAACTATACAATG
TCATTGTTACAGCTCATGCTTTTATAATAATTTTCTTTTTGGTAATGCCAATGATGATTG
GAGGGTTTGGTAATTGGTTAATCCCTTTAATAATTGGGGCTCCTGATATGGCTTTTCCTC
GTTTGAATAATCTAAGGTTTTGGCTACTTGTGCCTGCTTTATTTTTACTTTTGAGGTCTT
CCTTGGTAGAGAGTGGTGTTGGAACTGGCTGGACTGTTTATCCTCCTTTATCTGGAAATG
TAGCACATTCTGGGGCTTCTGTGGATTTGGCTATTTTTTCTTTACATCTTGCCGGTGCTT
CTTCTATTTTGGGAGCTATTAATTTTATTTCTACTGTTGGAAATATACGATCTCCTGGAT
TAGTGGCTGAGCGAATTCCATTGTTTGTTTGAAGAGTTACTGTGACAGCTGTTTTGTTAG
TAGCTGCTTTGCCAGTTTTAGCTGGTGCCATTACTATGCTCCTTACCGATCGTAACTTAA
ATACGTCATTCTTTGATCCAACTGGTGGTGGTGATCCTATTTTGTATATACATTTGTTTT

>biv_383_1_Indonaia_andersoniana
GGACTTTATATCTATTGTTGGCTTTGTGATCTGGGTTGATTGGGTTGGCGTTGAGATTAT
TAATTCGAGCTGAGTTAGGTCAACCTGGGAGGTTGCTGGGGGATGACCAATTGTATAATG
TTATTGTGACAGCTCATGCTTTTATAATAATTTTTTTCTTAGTGATGCCTATAATAATTG
GAGGATTTGGTAATTGGTTAATTCCGTTGATAATTGGGGCTCCTGATATGGCTTTTCCTC
GGTTAAATAATTTAAGATTCTGGTTGCTTGTACCTGCTTTGTTTTTGTTATTGAGATCTT
CGTTAGTGGAGAGTGGTGTTGGTACTGGTTGGACAGTTTATCCTCCTTTATCTGGGAACG
TTGCTCATTCAGGGGCTTCTGTTGATTTGGCAATTTTTTCTTTGCATCTTGCTGGTGCTT
CTTCAATTTTGGGTGCTATTAATTTTATTTCTACTGTTGGTAATATGCGTTCTCCAGGGT
TGGTGGCTGAGCGTATTCCTTTGTTTGTGTGAAGGGTTACTGTAACAGCTGTTTTATTGG
TTGCAGCTTTGCCTGTTTTAGCTGGTGCTATTACTATGTTACTTACTGATCGTAATTTAA
ATACTTCTTTTTTTGACCCGACTGGTGGTGGTGATCCTATTTTGTACATACATCTTTTTT

>biv_1005_1_Indonaia_andersoniana
GGACTTTATATCTATTGTTGGCTTTGTGATCTGGGTTGATTGGGTTGGCGTTGAGATTAT
TAATTCGAGCTGAGTTAGGTCAACCTGGGAGGTTGCTGGGGGATGATCAATTGTATAATG
TTATTGTGACAGCTCATGCTTTTATAATAATTTTTTTCTTAGTGATGCCTATAATAATTG
GAGGATTTGGTAATTGGTTAATTCCGTTGATAATTGGGGCTCCTGATATGGCTTTTCCTC
GGTTAAATAATTTAAGATTCTGGTTGCTTGTACCTGCTTTGTTTTTGTTATTGAGATCTT
CGTTAGTGGAGAGTGGTGTTGGTACTGGTTGGACAGTTTATCCTCCTTTATCTGGGAACG
TTGCTCATTCAGGGGCTTCTGTTGATTTGGCAATTTTTTCTTTGCATCTTGCTGGTGCTT
CTTCAATTTTGGGTGCTATTAATTTTATTTCTACTGTTGGTAATATGCGTTCTCCAGGGT
TGGTGGCTGAGCGTATTCCTTTGTTTGTGTGAAGGGTTACTGTAACAGCTGTTTTATTGG
TTGCAGCTTTGCCTGTTTTAGCTGGTGCTATTACTATGTTACTTACTGATCGTAATTTAA
ATACTTCTTTTTTTGACCCGACTGGTGGTGGTGATCCTATTTTGTACATACATCTTTTTT

>biv_405A_1_Indonaia_andersoniana
GGACTTTATATTTATTGTTGGCTTTGTGATCTGGGTTAATTGGGTTGGCGTTGAGATTAT
TAATTCGAGCTGAGTTAGGTCAACCTGGGAGGTTGCTGGGGGATGACCAATTGTATAATG
TTATTGTGACAGCTCATGCTTTTATAATAATTTTTTTCTTAGTGATGCCTATGATAATTG
GAGGATTTGGTAATTGGTTGATTCCGTTGATAATTGGGGCTCCTGATATGGCTTTTCCTC
GGTTAAATAATTTAAGATTCTGGTTGCTTGTACCTGCTTTGTTTTTATTATTGAGATCTT
CGTTAGTGGAGAGTGGTGTTGGTACTGGTTGGACAGTTTACCCTCCTTTATCTGGGAACG
TTGCTCATTCAGGGGCTTCTGTTGATTTGGCAATTTTTTCTTTGCATCTTGCTGGTGCTT
CTTCAATTTTGGGTGCTATTAATTTTATTTCTACTGTTGGTAATATGCGTTCTCCAGGGT
TGGTGGCTGAGCGTATTCCTTTATTTGTGTGAAGGGTTACTGTAACAGCTGTTTTATTGG
TTGCAGCTTTGCCTGTTTTAGCTGGTGCTATTACTATGTTACTTACTGATCGTAATTTAA
ATACTTCTTTTTTTGACCCAACTGGTGGTGGTGATCCTATTTTGTACATACATCTTTTTT

>biv_407_1_Indonaia_andersoniana
GGACTTTATATCTATTGTTGGCTTTGTGATCTGGGTTAATTGGGTTGGCGTTGAGATTAT
TAATTCGAGCTGAGTTAGGTCAACCTGGGAGGTTGCTGGGGGATGACCAATTGTATAATG
TTATTGTGACAGCCCATGCTTTTATAATAATTTTTTTCTTAGTGATGCCTATGATAATTG
GAGGATTTGGTAATTGGTTAATTCCGTTGATAATTGGGGCTCCTGATATGGCTTTTCCTC
GGTTAAATAATTTAAGATTCTGGTTGCTTGTACCTGCTTTGTTTTTATTATTAAGATCTT
CGTTAGTGGAGAGTGGTGTTGGTACTGGTTGGACAGTTTATCCTCCTTTATCTGGGAACG
TTGCTCATTCAGGGGCTTCTGTTGATTTGGCAATTTTTTCTTTGCATCTTGCTGGTGCTT
CTTCAATTTTGGGTGCTATTAATTTTATTTCTACTGTTGGTAATATGCGTTCTCCAGGGT
TGGTGGCTGAGCGTATTCCTTTGTTTGTGTGAAGGGTTACTGTAACAGCTGTTTTATTGG
TTGCAGCTTTGCCTGTTTTAGCTGGTGCTATTACTATGTTACTTACTGATCGTAATTTAA
ATACTTCTTTTTTTGACCCGACTGGTGGTGGTGATCCTATTTTGTACATACATCTTTTTT

>biv_412_1_Indonaia_andersoniana
GGACTTTATATCTATTGTTGGCTTTGTGATCTGGGTTAATTGGGTTGGCGTTGAGATTAT
TAATTCGAGCTGAGTTAGGTCAACCTGGGAGGTTGCTGGGGGATGACCAATTGTATAATG
TTATTGTGACAGCCCATGCTTTTATAATAATTTTTTTCTTAGTGATGCCTATGATAATTG
GAGGATTTGGTAATTGGTTAATTCCGTTGATAATTGGGGCTCCTGATATGGCTTTTCCTC
GGTTAAATAATTTAAGATTCTGGTTGCTTGTACCTGCTTTGTTTTTATTATTAAGATCTT
CGTTAGTGGAGAGTGGTGTTGGTACTGGTTGGACAGTTTATCCTCCTTTATCTGGGAACG
TTGCTCATTCAGGGGCTTCTGTTGATTTGGCAATTTTTTCTTTGCATCTTGCTGGTGTTT
CTTCAATTTTGGGTGCTATTAATTTTATTTCTACTGTTGGTAATATGCGTTCTCCAGGGT
TGGTGGCTGAGCGTATTCCTTTGTTTGTGTGAAGGGTTACTGTAACAGCTGTTTTATTGG
TTGCAGCTTTGCCTGTTTTAGCTGGTGCTATTACTATGTTACTTACTGATCGTAATTTAA
ATACTTCTTTTTTTGACCCGACTGGTGGTGGTGATCCTATTTTGTACATACATCTTTTTT

>biv_412_3_Indonaia_andersoniana
GGACTTTATATCTATTGTTGGCTTTGTGATCTGGGTTAATTGGGTTGGCGTTGAGATTAT
TAATTCGAGCTGAGTTAGGTCAACCTGGGAGGTTGCTGGGGGATGACCAATTGTATAATG
TTATTGTGACAGCCCATGCTTTTATAATAATTTTTTTCTTAGTGATGCCTATGATAATTG
GAGGATTTGGTAATTGGTTAATTCCGTTGATAATTGGGGCTCCTGATATGGCTTTTCCTC
GGTTAAATAATTTAAGATTCTGGTTGCTTGTACCTGCTTTGTTTTTATTATTAAGATCTT
CGTTAGTGGAGAGTGGTGTTGGTACTGGTTGGACAGTTTATCCTCCTTTATCTGGGAACG
TTGCTCATTCAGGGGCTTCTGTTGATTTGGCAATTTTTTCTTTGCATCTTGCTGGTGTTT
CTTCAATTTTGGGTGCTATTAATTTTATTTCTACTGTTGGTAATATGCGTTCTCCAGGGT
TGGTGGCTGAGCGTATTCCTTTGTTTGTGTGAAGGGTTACTGTAACAGCTGTTTTATTGG
TTGCAGCTTTGCCTGTTTTAGCTGGTGCTATTACTATGTTACTTACTGATCGTAATTTAA
ATACTTCTTTTTTTGACACGACTGGTGGTGGTGATCCTATTTTGTACATACATCTTTTTT

>biv_414_2_Indonaia_andersoniana
GGACTTTATATTTATTGTTGGCTTTGTGATCTGGGTTAATTGGGTTGGCGTTGAGATTAT
TAATTCGAGCTGAGTTAGGTCAACCTGGGAGGTTGCTGGGGGATGACCAATTGTATAATG
TTATTGTGACAGCTCATGCTTTTATAATAATTTTTTTCTTAGTGATGCCTATGATAATTG
GAGGATTTGGTAATTGGTTGATTCCGTTGATAATTGGGGCTCCTGATATGGCTTTTCCTC
GGTTAAATAATTTAAGATTCTGGTTGCTTGTACCTGCTTTGTTTTTATTATTGAGATCTT
CGTTAGTGGAGAGTGGTGTTGGTACTGGTTGGACAGTTTACCCTCCTTTATCTGGGAACG
TTGCTCATTCAGGGGCTTCTGTTGATTTGGCAATTTTTTCTTTGCATCTTGCTGGTGCTT
CTTCAATTTTGGGTGCTATTAATTTTATTTCTACTGTTGGTAATATGCGTTCTCCAGGGT
TGGTGGCTGAGCGTATTCCTTTATTTGTGTGAAGGGTTACTGTAACAGCTGTTTTATTGG
TTGCAGCTTTGCCTGTTTTAGCTGGTGCTATTACTATGTTACTTACTGATCGTAATTTAA
ATACTTCTTTTTTTGACCCAACTGGTGGTGGTGATCCTATTTTGTATATACATCTTTTTT

>biv_368_1_Indonaia_andersoniana
GGACTTTATATCTGTTGTTGGCTTTGTGATCTGGGTTAATTGGGTTGGCGTTGAGATTAT
TAATTCGAGCTGAGTTAGGTCAACCTGGGAGGTTGCTGGGGGATGACCAATTGTATAATG
TTATTGTGACAGCTCATGCTTTTATAATAATTTTTTTCTTGGTGATGCCTATGATAATTG
GAGGATTTGGTAATTGGTTAATTCCGTTGATAATTGGGGCTCCTGATATGGCTTTTCCTC
GGTTAAATAATTTAAGATTCTGGTTGCTTGTACCTGCTTTGTTTTTATTATTGAGATCTT
CGTTAGTGGAGAGTGGTGTTGGTACTGGTTGGACAGTTTATCCTCCTTTATCTGGGAACG
TTGCTCATTCAGGGGCTTCTGTTGATTTGGCAATTTTTTCTTTGCATCTTGCTGGTGCTT
CTTCAATTTTGGGTGCTATTAATTTTATTTCTACTGTTGGTAATATGCGTTCTCCAGGGT
TGGTGGCTGAGCGTATTCCTTTGTTTGTATGAAGGGTTACTGTAACAGCTGTTTTATTGG
TTGCAGCTTTGCCTGTTTTAGCTGGTGCTATTACTATGTTACTTACTGATCGTAATTTAA
ATACTTCTTTTTTTGACCCGACTGGTGGTGGTGATCCTATTTTGTACATACATCTTTTTT

>biv_615_1_Indonaia_andersoniana
GGACTTTATATCTATTGTTGGCTTTGTGATCTGGGTTAATTGGGTTGGCGTTGAGATTAT
TAATTCGAGCTGAGTTAGGTCAACCTGGGAGGTTGCTGGGGGATGACCAATTGTATAATG
TTATTGTGACAGCTCATGCTTTTATAATAATTTTTTTCTTAGTGATGCCTATAATAATTG
GAGGATTTGGTAATTGGTTGATTCCGTTGATAATTGGGGCTCCTGATATGGCTTTTCCTC
GGTTAAATAATTTAAGATTCTGGTTGCTTGTACCTGCTTTGTTTTTGTTATTGAGATCTT
CGTTAGTGGAGAGTGGTGTTGGTACTGGTTGGACAGTTTACCCTCCTTTATCTGGGAACG
TTGCTCATTCAGGGGCTTCTGTTGATTTGGCAATTTTTTCTTTGCATCTTGCTGGTGCTT
CTTCAATTTTGGGTGCTATTAATTTTATTTCTACTGTTGGTAATATGCGCTCTCCAGGGT
TGGTGGCTGAGCGTATTCCTTTATTTGTGTGAAGGGTTACTGTAACAGCTGTTTTATTGG
TTGCAGCTTTGCCTGTTTTAGCTGGTGCTATTACTATGTTACTTACTGATCGTAATTTAA
ATACTTCTTTTTTTGACCCAACTGGTGGTGNNNNNNNNNNNNNNNNNNNNNNNNNNNNNN

>biv_615_2_Indonaia_andersoniana
GGACTTTATATTTATTGTTGGCTTTGTGATCTGGGTTAATTGGGTTGGCGTTGAGATTAT
TAATTCGAGCTGAGTTAGGTCAACCTGGGAGGTTGCTGGGGGATGACCAATTGTATAATG
TTATTGTGACAGCTCATGCTTTTATAATAATTTTTTTCTTAGTGATGCCTATGATAATTG
GAGGATTTGGTAATTGGTTGATTCCGTTGATAATTGGGGCTCCTGATATGGCTTTTCCTC
GGTTAAATAATTTAAGATTCTGGTTGCTTGTACCTGCTTTGTTTTTATTATTGAGATCTT
CGTTAGTGGAGAGTGGTGTTGGTACTGGTTGGACAGTTTACCCTCCTTTATCTGGGAACG
TTGCTCATTCAGGGGCTTCTGTTGATTTGGCAATTTTTTCTTTGCATCTTGCTGGTGCTT
CTTCAATTTTGGGTGCTATTAATTTTATTTCTACTGTTGGTAATATGCGTTCTCCAGGGT
TGGTGGCTGAGCGTATTCCTTTATTTGTGTGAAGGGTTACTGTAACAGCTGTTTTATTGG
TTGCAGCTTTGCCTGTTTTAGCTGGTGCTATTACTATGTTACTTACTGATCGTAATTTAA
ATACTTCTTTTTTTGACCCAACTGGTGGTGNNNNNNNNNNNNNNNNNNNNNNNNNNNNNN

>biv_450_1_Indonaia_andersoniana
GGACTTTATATCTATTGTTGGCTTTGTGATCTGGGTTAATTGGGTTGGCGTTGAGATTAT
TAATTCGAGCTGAGTTAGGTCAACCTGGGAGGTTGCTGGGGGATGACCAATTGTATAATG
TTATTGTGACAGCTCATGCTTTTATAATAATTTTTTTCTTAGTGATGCCTATGATAATTG
GAGGATTTGGTAATTGGTTGATTCCGTTGATAATTGGGGCTCCTGATATGGCTTTTCCTC
GGTTAAATAATTTAAGATTCTGGTTGCTTGTACCTGCTTTGTTTTTATTATTGAGATCTT
CGTTAGTGGAGAGTGGTGTTGGTACTGGTTGGACAGTTTACCCTCCTTTATCTGGGAACG
TTGCTCATTCAGGGGCTTCTGTTGATTTGGCAATTTTTTCTTTGCATCTTGCTGGTGCTT
CTTCAATTTTGGGTGCCATTAATTTTATTTCTACTGTTGGTAATATGCGTTCTCCAGGGT
TGGTGGCTGAGCGTATTCCTTTATTTGTGTGAAGGGTTACTGTAACAGCTGTTTTATTAG
TTGCAGCTTTGCCTGTTTTAGCTGGTGCTATTACTATGTTACTTACTGATCGTAATTTAA
ATACTTCTTTTTTTGACCCAACTGGTGGTGGTGATCCTATTTTGTACATACATCTTTTTT

>biv_450_2_Indonaia_andersoniana
GGACTTTATATTTATTGTTGGCTTTGTGATCTGGGTTAATTGGGTTGGCGTTGAGATTAT
TAATTCGAGCTGAGTTAGGTCAACCTGGGAGGTTGCTGGGGGATGACCAATTGTATAATG
TTATTGTGACAGCTCATGCTTTTATAATAATTTTTTTCTTAGTGATGCCTATGATAATTG
GAGGATTTGGTAATTGGTTGATTCCGTTGATAATTGGGGCTCCTGATATGGCTTTTCCTC
GTTTAAATAATTTAAGATTCTGATTGCTTGTACCTGCTTTGTTTTTATTATTGAGATCTT
CGTTAGTGGAGAGTGGTGTTGGTACTGGTTGGACAGTTTACCCTCCTTTATCTGGGAACG
TTGCTCATTCAGGGGCTTCTGTTGATTTGGCAATTTTTTCTTTGCATCTTGCTGGTGCTT
CTTCAATTTTGGGTGCTATTAATTTTATTTCTACTGTTGGTAATATGCGTTCTCCAGGGT
TGGTGGCTGAGCGTATTCCTTTATTTGTGTGAAGGGTTACTGTAACAGCTGTTTTATTGG
TTGCAGCTTTGCCTGTTTTAGCTGGTGCTATTACTATGTTACTTACTGATCGTAATTTAA
ATACTTCTTTTTTTGACCCAACTGGTGGTGGTGATCCTATTTTGTACATACATCTTTTTT

>biv_259_1_Indonaia_andersoniana
GGACTTTATATTTATTGTTGGCTTTGTGATCTGGGTTAATTGGGTTGGCGTTGAGATTAT
TAATTCGAGCTGAGTTAGGTCAACCTGGGAGGTTGCTGGGGGATGACCAATTGTATAATG
TTATTGTGACAGCTCATGCTTTTATAATAATTTTTTTCTTAGTGATGCCTATGATAATTG
GAGGATTTGGTAATTGGTTGATTCCGTTGATAATTGGGGCTCCTGATATGGCTTTTCCTC
GATTAAATAATTTAAGATTCTGGTTGCTTGTACCTGCTTTGTTTTTATTATTGAGATCTT
CGTTAGTGGAGAGTGGTGTTGGTACTGGTTGGACAGTTTACCCTCCTTTATCTGGGAACG
TTGCTCATTCAGGGGCTTCTGTTGATTTGGCAATTTTTTCTTTGCATCTTGCTGGTGCTT
CTTCAATTTTGGGTGCTATTAATTTTATTTCTACTGTTGGTAATATGCGTTCTCCAGGGT
TGGTGGCTGAGCGTATTCCTTTATTTGTGTGAAGGGTTACTGTAACAGCTGTTTTATTGG
TTGCAGCTTTGCCTGTTTTAGCTGGTGCTATTACTATGTTACTTACTGATCGTAATTTAA
ATACTTCTTTTTTTGACCCAACTGGTGGTGGTGATCCTATTTTGTACCTACATCTTTTTT

>biv_263_1_Indonaia_andersoniana
GGACTTTATATTTATTGTTGGCTTTGTGATCTGGGTTAATTGGGTTGGCGTTGAGATTAT
TAATTCGAGCTGAGTTAGGTCAACCTGGGAGGTTGCTGGGGGATGACCAATTGTATAATG
TTATTGTGACAGCTCATGCTTTTATAATAATTTTTTTCTTAGTGATGCCTATGATAATTG
GAGGATTTGGTAATTGGTTGATTCCGTTGATAATTGGGGCTCCTGATATGGCTTTTCCTC
GATTAAATAATTTAAGATTCTGGTTGCTTGTACCTGCTTTGTTTTTATTATTGAGATCTT
CGTTAGTGGAGAGTGGTGTTGGTACTGGTTGGACAGTTTACCCTCCTTTATCTGGGAACG
TTGCTCATTCAGGGGCTTCTGTTGATTTGGCAATTTTTTCTTTGCATCTTGCTGGTGCTT
CTTCAATTTTGGGTGCTATTAATTTTATTTCTACTGTTGGTAATATGCGTTCTCCAGGGT
TGGTGGCTGAGCGTATTCCTTTATTTGTGTGAAGGGTTACTGTAACAGCTGTTTTATTGG
TTGCAGCTTTGCCTGTTTTAGCTGGTGCTATTACTATGTTACTTACTGATCGTAATTTAA
ATACTTCTTTTTTTGACCCAACTGGTGGTGGTGATCCTATTTTGTACATACATCTTTTTT

>biv 108_1_Indonaia_andersoniana
GGACTTTATATTTATTGTTGGCTTTGTGATCTGGGTTAATTGGGTTGGCGTTGAGATTAT
TAATTCGAGCTGAGTTAGGTCAACCTGGGAGGTTGCTGGGGGATGACCAATTGTATAATG
TTATTGTGACAGCTCATGCTTTTATAATAATTTTTTTCTTAGTGATGCCTATGATAATTG
GAGGATTTGGTAATTGGTTGATTCCTTTGATAATTGGGGCTCCTGATATGGCTTTTCCTC
GGTTAAATAATTTAAGATTCTGGTTGCTTGTACCTGCTTTGTTTTTATTATTGAGATCTT
CGTTAGTGGAGAGTGGTGTTGGTACTGGTTGGACAGTTTACCCTCCTTTATCTGGGAACG
TTGCTCATTCAGGGGCTTCTGTTGATTTGGCAATTTTTTCTTTGCATCTTGCTGGTGCTT
CTTCAATTTTGGGTGCTATTAATTTTATTTCTACTGTTGGTAATATGCGTTCTCCAGGGT
TGGTGGCTGAGCGTATTCCTTTGTTTGTGTGAAGGGTTACTGTAACAGCTGTTTTATTGG
TTGCAGCTTTGCCTGTTTTAGCTGGTGCTATTACTATGTTACTTACTGATCGTAATTTAA
ATACTTCTTTTTTTGACCCAGCTGGTGGTGGTGATCCGATTTTGTACATACATCATTTTT

>biv 108_2_Indonaia_andersoniana
GGACTTTATATTTATTGTTGGCTTTGTGATCTGGGTTAATTGGGTTGGCGTTGAGATTAT
TAATTCGAGCTGAGTTAGGTCAACCTGGGAGATTGCTGGGGGATGACCAATTGTATAATG
TTATTGTGACAGCTCATGCTTTTATAATAATTTTTTTCTTAGTGATGCCTATGATAATTG
GAGGATTTGGTAATTGGTTGATTCCGTTGATAATTGGGGCTCCTGATATGGCTTTTCCTC
GGTTAAATAATTTAAGATTCTGGTTGCTTGTACCTGCTTTGTTTTTATTATTGAGATCTT
CGTTAGTGGAGAGTGGTGTTGGTACTGGTTGGACAGTTTACCCTCCTTTATCTGGGAACG
TTGCTCATTCAGGGGCTTCTGTTGATTTGGCAATTTTTTCTTTGCATCTTGCTGGTGCTT
CCTCAATTTTGGGTGCTATTAATTTTATTTCTACTGTTGGTAATATGCGTTCTCCAGGGT
TGGTGGCTGAGCGTATTCCTTTGTTTGTGTGAAGGGTTACTGTAACAGCTGTTTTATTGG
TTGCAGCTTTGCCTGTTTTAGCTGGTGCTATTACTATGTTACTTACTGATCGTAATTTAA
ATACTTCTTTTTTTGACCCAGCTGGTGGTGGTGATCCGATTTTGTACATACATCATTTTT

>biv 108_3_Indonaia_andersoniana
GGACTTTATATTTATTGTTGGCTTTGTGATCTGGGTTAATTGGGTTGGCGTTGAGATTAT
TAATTCGAGCTGAGTTAGGTCAACCTGGGAGGTTGCTGGGGGATGACCAATTGTATAATG
TTATTGTGACAGCTCATGCTTTTATAATAATTTTTTTCTTAGTGATGCCTATGATAATTG
GAGGATTTGGTAATTGGTTGATTCCGTTGATAATTGGGGCTCCTGATATGGCTTTTCCTC
GGTTAAATAATTTAAGATTCTGGTTGCTTGTACCTGCTTTGTTTTTATTATTGAGATCTT
CGTTAGTGGAGAGTGGTGTTGGTACTGGTTGGACAGTTTACCCTCCTTTATCTGGGAACG
TTGCTCATTCAGGGGCTTCTGTTGATTTGGCAATTTTTTCTTTGCATCTTGCTGGTGCTT
CTTCAATTTTGGGTGCTATTAATTTTATTTCTACTGTTGGTAATATGCGTTCTCCAGGGT
TGGTGGCTGAGCGTATTCCTTTGTTTGTGTGAAGGGTTACTGTAACAGCTGTTTTATTGG
TTGCAGCTTTGCCTGTTTTAGCTGGTGCTATTACTATGTTACTTACTGATCGTAATTTAA
ATACTTCTTTTTTTGACCCAGCTGGTGGTGGTGATCCGATTTTGTACATACATCATTTTT

>biv_434_Indonaia_andersoniana
GGACTTTATATCTATTGTTGGCTTTGTGATCTGGGTTAATTGGGTTGGCGTTGAGATTAT
TAATTCGAGCTGAGTTAGGTCAACCTGGGAGGTTGCTGGGGGATGACCAATTGTATAATG
TTATTGTGACAGCTCATGCTTTTATAATAATTTTTTTCTTAGTGATGCCTATGATAATTG
GAGGATTTGGTAATTGGTTGATTCCGTTGATAATTGGGGCTCCTGATATGGCTTTTCCTC
GGTTAAATAATTTAAGATTCTGGTTGCTTGTACCTGCTTTGTTTTTATTATTGAGATCTT
CGTTAGTGGAGAGTGGTGTTGGTACTGGTTGGACAGTTTACCCTCCTTTATCTGGGAACG
TTGCTCATTCAGGGGCTTCTGTTGATTTGGCAATTTTTTCTTTGCATCTTGCTGGTGCTT
CTTCAATTTTGGGTGCTATTAATTTTATTTCTACTGTTGGTAATATGCGTTCTCCAGGGT
TGGTGGCTGAGCGTATTCCTTTATTTGTGTGAAGGGTTACTGTAACAGCTGTTTTATTAG
TTGCAGCTTTGCCTGTTTTAGCTGGTGCTATTACTATGTTACTTACTGATCGTAATTTAA
ATACTTCTTTTTTTGACCCAACTGGTGGTGGTGATCCTATTTTGTACATACATCTTTTTT

>biv_338_1_Indonaia_subclathrata
GGACTTTATACTTATTGTTGGCTTTGTGATCTGGGTTAATTGGGTTGGCGTTGAGATTAT
TAATTCGAGCTGAATTAGGTCAACCTGGGAGGTTGCTGGGAGATGACCAATTGTATAATG
TTATTGTGACAGCTCATGCTTTTATAATAATTTTTTTCTTGGTGATGCCTATGATAATTG
GTGGATTCGGTAATTGGTTGATTCCGTTGATAATTGGGGCTCCTGATATGGCTTTTCCTC
GGTTAAATAATTTAAGATTTTGGTTGCTTGTACCTGCTTTGTTTTTATTATTGAGGTCTT
CGTTAGTGGAGAGTGGTGTTGGTACTGGTTGGACAGTTTACCCTCCTTTATCTGGGAACG
TTGCTCATTCAGGGGCTTCTGTTGATTTGGCAATTTTTTCTTTACATCTTGCTGGTGCTT
CCTCAATTTTGGGTGCTATTAATTTTATTTCTACTGTTGGTAATATGCGTTCTCCAGGGT
TGGTGGCTGAGCGTATCCCTTTGTTTGTGTGAAGGGTTACTGTAACAGCTGTTTTATTGG
TTGCAGCTTTGCCTGTTTTAGCTGGTGCTATTACTATGTTACTTACTGATCGTAATTTGA
ATACTTCTTTTTTTGACCCAACTGGTGGTGGTGATCCTATTTTGTATATGCATCTTTTTT

>biv_338_2_Indonaia_subclathrata
GGACTTTATATTTATTGTTGGCTTTGTGATCTGGGTTAATTGGGTTGGCGTTGAGATTAT
TAATTCGAGCTGAATTAGGTCAACCTGGGAGGTTGTTGGGGGATGACCAATTGTATAATG
TTATTGTGACAGCTCATGCTTTTATAATAATTTTTTTCTTGGTGATGCCTATGATAATTG
GTGGATTCGGTAATTGGTTGATTCCGTTGATAATTGGGGCTCCTGATATGGCTTTTCCTC
GGTTAAATAATTTAAGATTTTGGTTGCTTGTACCTGCTTTGTTTTTATTATTGAGGTCTT
CGTTAGTGGAGAGTGGTGTTGGTACTGGTTGGACAGTTTACCCTCCTTTATCTGGGAACG
TTGCTCATTCAGGGGCTTCTGTTGATTTGGCAATCTTTTCTTTACATCTTGCTGGTGCTT
CCTCAATTTTGGGTGCTATTAATTTTATTTCTACTGTTGGTAATATGCGTTCTCCAGGGT
TGGTGGCTGAGCGTATTCCTTTGTTTGTGTGAAGGGTTACTGTAACAGCTGTTTTATTGG
TTGCAGCTTTGCCTGTTTTAGCTGGTGCTATTACTATGTTACTTACTGATCGTAATTTGA
ATACTTCTTTTTTTGACCCAACTGGTGGTGGTGATCCTATTTTGTATATACATCTTTTTT

>biv_338_3_Indonaia_subclathrata
GGACTTTATATTTATTGTTGGCTTTGTGATCTGGGTTAATTGGGTTGGCGTTGAGATTAT
TATTTCGAGCTGAATTAGGTCAACCTGGGAGGTTGTTGGGGGATGACCAATTGTATAATG
TTATTGTGACAGCTCATGCTTTTATAATAATTTTTTTCTTGGTGATGCCTATGATAATTG
GTGGATTCGGTAATTGGTTGATTCCGTTGATAATTGGGGCTCCTGATATGGCTTTTCCTC
GGTTAAATAATTTAAGATTTTGGTTGCTTGTACCTGCTTTGTTTTTATTATTGAGGTCTT
CGTTAGTGGAGAGTGGTGTTGGTACTGGTTGGACAGTTTACCCTCCTTTATCTGGGAACG
TTGCTCATTCAGGGGCTTCTGTTGATTTGGCAATCTTTTCTTTACATCTTGCTGGTGCTT
CCTCAATTTTGGGTGCTATTAATTTTATTTCTACTGTTGGTAATATGCGTTCTCCAGGGT
TGGTGGCTGAGCGTATTCCTTTGTTTGTGTGAAGGGTTACTGTAACAGCTGTTTTATTGG
TTGCAGCTTTGCCTGTTTTAGCTGGTGCTATTACTATGTTACTTACTGATCGTAATTTGA
ATACTTCTTTTTTTGACCCAACTGGTGGTGGTGATCCTATTTTGTATATACATCTTTTTT

>biv_347_1_Indonaia_subclathrata
GGACTTTATACTTATTGTTGGCTTTGTGATCTGGGTTAATTGGGTTGGCGTTGAGATTAT
TAATTCGAGCTGAATTAGGTCAACCTGGGAGGTTGTTGGGAGATGACCAATTGTATAATG
TTATTGTGACAGCTCATGCTTTTATAATAATTTTTTTCTTGGTGATGCCTATGATAATTG
GCGGATTCGGTAATTGGTTGATTCCGTTGATAATTGGGGCTCCTGATATGGCTTTTCCTC
GGTTAAATAATTTAAGATTTTGGTTGCTTGTACCTGCTTTGTTTTTATTATTGAGGTCTT
CGTTAGTGGAGAGTGGTGTTGGTACTGGTTGGACAGTTTACCCTCCTTTATCTGGGAACG
TTGCTCATTCAGGGGCTTCTGTTGATTTGGCAATTTTTTCTTTACATCTTGCTGGTGCTT
CCTCAATTTTGGGTGCTATTAATTTTATTTCTACTGTTGGTAATATGCGTTCTCCAGGGT
TGGTGGCTGAGCGTATTCCTTTGTTTGTGTGAAGGGTTACTGTAACAGCTGTTTTATTGG
TTGCAGCTTTGCCTGTTTTAGCTGGTGCTATTACTATATTACTTACTGATCGTAATTTGA
ATACTTCTTTTTTTGACCCAACTGGTGGTGGTGATCCTATTTTGTATATACATCTTTTTT

>biv_347_2_Indonaia_subclathrata
GGACTTTATACTTATTGTTGGCTTTGTGATCTGGGTTAATTGGGTTGGCGTTGAGATTAT
TAATTCGAGCTGAATTAGGTCAACCTGGGAGGTTGCTGGGAGATGACCAATTGTATAATG
TTATTGTGACAGCTCATGCTTTTATAATAATTTTTTTCTTGGTGATGCCTATGATAATTG
GTGGATTCGGTAATTGGTTGATTCCGTTGATAATTGGGGCTCCTGATATGGCTTTTCCTC
GGTTAAATAATTTAAGATTTTGGTTGCTTGTACCTGCTTTGTTTTTATTATTGAGGTCTT
CGTTAGTGGAGAGTGGTGTTGGTACTGGTTGGACAGTTTACCCTCCTTTATCTGGGAACG
TTGCTCATTCAGGGGCTTCTGTTGATTTGGCAATTTTTTCTTTACATCTTGCTGGTGCTT
CCTCAATTTTGGGTGCTATTAATTTTATTTCTACTGTTGGTAATATGCGTTCTCCAGGGT
TGGTGGCTGAGCGTATTCCTTTGTTTGTGTGAAGGGTTACTGTAACAGCTGTTTTATTGG
TTGCAGCTTTGCCTGTTTTAGCTGGTGCTATTACTATGTTACTTACTGATCGTAATTTGA
ATACTTCTTTTTTTGACCCAACTGGTGGTGGTGATCCTATTTTGTATATACATCTTTTTT

>biv_667_1_Indonaia_subclathrata
GGACTTTATACTTATTGTTGGCTTTGTGATCTGGGTTAATTGGGTTGGCGTTGAGATTAT
TAATTCGAGCTGAATTAGGTCAACCTGGGAGGTTGTTGGGAGATGACCAATTGTATAATG
TTATTGTGACAGCTCATGCTTTTATAATAATTTTTTTCTTGGTGATGCCTATGATAATTG
GTGGATTCGGTAATTGGTTGATTCCGTTGATAATTGGGGCTCCTGATATGGCTTTTCCTC
GGTTAAATAATTTAAGATTTTGGTTGCTTGTACCTGCTTTGTTTTTATTATTGAGGTCTT
CGTTAGTGGAGAGTGGTGTTGGTACTGGTTGGACAGTTTACCCTCCTTTATCTGGGAACG
TTGCTCATTCAGGGGCTTCTGTTGATTTGGCAATTTTTTCTTTGCATCTTGCTGGTGCTT
CCTCAATTTTGGGTGCTATTAATTTTATTTCTACTGTTGGTAATATGCGTTCTCCAGGGT
TGGTGGCTGAGCGTATTCCTTTGTTTGTGTGAAGGGTTACTGTAACAGCTGTTTTATTGG
TTGCAGCTTTGCCTGTTTTAGCTGGTGCTATTACTATGTTACTTACTGATCGTAATTTGA
ATACTTCTTTTTTTGACCCAACTGGTGGTGGTGATCCTATTTTGTATATACATCTTTTTT

>KT869141_Indonaia_caerulea
NGACTTTGTACTTATTGTTGGCTTTGTGATCTGGGTTAATTGGGTTGGCGTTGAGATTAT
TGATTCGAGCTGAATTAGGTCAACCTGGGAGGTTGCTGGGGGATGACCAATTGTATAATG
TTATTGTGACAGCTCATGCTTTTATAATAATTTTTTTCTTGGTGATGCCTATGATAATTG
GTGGATTTGGTAATTGATTGATTCCGTTGATAATTGGGGCTCCTGATATAGCTTTTCCTC
GGTTGAATAATTTAAGATTTTGGTTACTTGTACCTGCTTTGTTTTTATTATTGAGATCTT
CGTTAGTGGAGAGTGGTGTTGGTACTGGTTGGACAGTTTACCCTCCTTTATCTGGGAATG
TTGCTCATTCAGGGGCTTCTGTTGATTTGGCAATTTTTTCTTTGCATCTTGCTGGTGCCT
CCTCAATTTTGGGTGCTATTAATTTTATTTCTACTGTTGGTAATATGCGTTCTCCAGGGT
TGGTGGCTGAGCGTATTCCTTTGTTTGTGTGAAGGGTTACTGTAACAGCTGTTTTATTGG
TTGCAGCTTTGCCTGTTTTAGCTGGTGCTATTACTATATTACTTACTGATCGTAATTTGA
ATACTTCTTTTTTTGACCNNNNNNNNNNNNNNNNNNNNNNNNNNNNNNNNNNNNNNNNNN

>KF690124_Indonaia_khadakvaslaensis
NGACTCTATATTTATTGTTGGCTTTGTGATCTGGGTTAATTGGGTTAGCGTTGAGACTAT
TAATTCGAGCTGAGTTAGGTCAACCTGGGAGGTTGTTGGGGGATGACCAGTTGTACAATG
TTATTGTGACAGCTCATGCTTTTATAATAATTTTTTTCTTGGTGATGCCTATAATAATTG
GTGGATTTGGAAATTGGTTGATTCCGTTGATAATTGGGGCTCCTGATATGGCTTTTCCTC
GGTTGAATAATTTAAGATTTTGGTTACTTGTACCTGCTTTGTTTTTATTGTTGAGATCTT
CGTTAGTGGAGAGTGGTGTTGGTACTGGTTGAACAGTTTACCCTCCTTTATCTGGGAATG
TTGCTCATTCGGGGGCTTCTGTTGATTTGGCAATTTTTTCTTTGCATCTTGCTGGTGCTT
CTTCAATTTTGGGTGCTATTAATTTTATTTCTACTGTTGGTAATATGCGTTCTCCAGGGT
TAGTGGCTGAGCGTATTCCTTTGTTTGTATGAAGGGTTACTGTAACAGCTGTTTTATTGG
TTGCAGCTTTGCCTGTTTTAGCTGGTGCTATTACTATGCTACTTACTGATCGTAATTTAA
ATACTTCTTTTTTTGACCCAACTGGTGGTGGTGACCCTATTTTGTATATGCATCTTTTTN

>KP268827_Indonaia_lima
NTACTTTATATCTATTGTTGGCTTTGTGATCTGGGTTAATTGGGTTGGCGTTGAGGCTAT
TAATTCGAGCCGAGTTAGGTCAACCTGGGAGGTTGTTGGGGGATGATCAGTTGTATAATG
TTATTGTGACAGCTCATGCTTTTATAATAATTTTTTTCTTGGTGATGCCTATGATAATTG
GTGGATTTGGTAATTGGTTGATTCCGTTGATAATTGGGGCTCCTGATATGGCTTTTCCTC
GGTTAAATAATTTAAGATTCTGGTTACTTGTACCTGCTTTGTTTTTATTACTCAGATCTT
CGTTAGTGGAGAGTGGTGTTGGTACTGGTTGAACAGTTTACCCTCCTTTATCTGGGAACG
TTGCTCATTCGGGGGCTTCTGTTGATTTGGCTATTTTTTCTTTGCATCTTGCTGGTGCTT
CTTCAATTTTGGGTGCTATTAATTTTATTTCTACTGTTGGTAATATGCGTTCTCCAGGGT
TAGTGGCTGAGCGTATTCCTTTGTTTGTGTGAAGGGTTACTGTAACAGCTGTTTTATTGG
TTGCAGCTTTGCCTGTTTTAGCTGGTGCTATTACTATATTACTTACTGATCGTAATTTGA
ATACTTCTTTTTTTGACCCAACTGGTGGTGGTGACCCTATTTTGTATATACATCTTTTTN

>biv_248_1_Radiatula_mouhoti
GAACTTTGTATTTGCTGTTAGCTTTGTGATCTGGTTTAATTGGGTTGGCTCTTAGGTTGT
TAATTCGAGCTGAGTTAGGCCAACCGGGGAGATTGTTAGGAGATGATCAATTATATAATG
TGATTGTAACCGCTCATGCTTTTATAATAATTTTTTTCTTAGTTATACCAATGATGATTG
GTGGATTTGGTAATTGGTTAATCCCTTTAATGATTGGGGCTCCTGATATGGCTTTTCCTC
GATTAAATAACTTAAGGTTTTGGTTACTTGTGCCTGCTTTGTTTTTGTTATTAAGATCTT
CGTTGGTGGAAAGTGGTGTAGGAACTGGTTGGACCGTTTATCCACCTTTGTCTGGTAATG
TGGCACATTCAGGGGCTTCTGTTGATCTGGCTATTTTTTCATTGCATCTTGCTGGTGCTT
CCTCAATTTTGGGGGCTATTAATTTTATTTCTACTGTGGGTAATATACGTTCGCCTGGGT
TGGTGGCTGAGCGAATTCCTTTGTTTGTGTGAAGAGTTACTGTGACGGCTGTTTTATTGG
TGGCAGCTTTACCTGTTTTAGCTGGTGCTATTACTATGCTTCTTACTGATCGTAATTTAA
ATACGTCGTTTTTTGATCCTACTGGAGGTGGTGATCCTATTTTATATATGCATTTGTTTT

>biv_248_4_Radiatula_mouhoti
GAACTTTGTATTTGCTGTTAGCTTTGTGATCTGGTTTAATTGGGTTGGCTCTTAGGTTGT
TAATTCGAGCTGAGTTAGGCCAACCGGGGAGATTGTTAGGAGATGATCAATTATATAATG
TGATTGTAACCGCTCATGCTTTTATAATAATTTTTTTCTTAGTTATACCAATGATGATTG
GTGGATTTGGTAATTGGTTAATCCCTTTAATGATTGGGGCTCCTGATATGGCTTTTCCTC
GATTAAATAACTTAAGGTTTTGGTTACTTGTACCTGCTTTGTTTTTGTTATTAAGATCTT
CGTTGGTGGAAAGTGGTGTAGGAACTGGTTGGACCGTTTATCCACCTTTGTCTGGTAATG
TGGCACATTCAGGGGCTTCTGTTGATCTGGCTATTTTTTCATTGCATCTTGCTGGTGCTT
CATCAATTTTGGGGGCTATTAATTTTATTTCTACTGTGGGTAATATACGTTCGCCTGGGT
TGGTGGCTGAGCGAATTCCTTTGTTTGTGTGAAGAGTTACTGTGACGGCTGTTTTATTGG
TGGCAGCTTTACCTGTTTTAGCTGGTGCTATTACTATGCTTCTTACTGATCGTAATTTAA
ATACGTCGTTTTTTGATCCTACTGGAGGTGGTGATCCTATTTTATATATGCATTTGTTTT

>biv_256_Radiatula_mouhoti
GAACTTTGTATTTGCTGTTAGCTTTGTGATCTGGTTTAATTGGGTTGGCTCTTAGGTTGT
TAATTCGAGCTGAGTTAGGCCAACCGGGGAGATTGTTAGGAGATGATCAATTATATAATG
TGATTGTAACCGCTCATGCTTTTATAATAATTTTTTTCTTAGTTATACCAATGATGATTG
GTGGATTTGGTAATTGGTTAATCCCTTTAATGATTGGGGCTCCTGATATGGCTTTTCCTC
GATTAAATAACTTAAGGTTTTGGTTACTTGTGCCTGCTTTGTTTTTGTTATTAAGATCTT
CGTTGGTGGAAAGTGGTGTAGGAACTGGTTGGACCGTTTATCCACCTTTGTCTGGTAATG
TGGCACATTCAGGGGCTTCTGTTGATCTGGCTATTTTTTCATTGCATCTTGCTGGTGCTT
CCTCAATTTTGGGGGCTATTAATTTTATTTCTACTGTGGGTAATATACGTTCGCCTGGGT
TGGTGGCTGAGCGAATTCCTTTGTTTGTGTGAAGAGTTACTGTGACGGCTGTTTTATTGG
TGGCAGCTTTACCTGTTTTAGCTGGTGCTATTACTATGCTTCTTACTGATCGTAATTTAA
ATACGTCATTTTTTGATCCTACTGGAGGTGGTGATCCTATTTTATATATGCATTTGTTTT

>biv_253_1_Radiatula_mouhoti
GAACTTTGTATTTGCTGTTAGCTTTGTGATCTGGTTTAATTGGGTTGGCTCTTAGGTTGT
TAATTCGAGCTGAGTTAGGCCAACCGGGGAGATTGTTAGGAGATGATCAATTATATAATG
TGATTGTAACCGCTCATGCTTTTATAATAATTTTTTTCTTAGTTATACCAATGATGATTG
GTGGATTTGGTAATTGGTTAATCCCTTTAATGATTGGGGCTCCTGATATGGCTTTTCCTC
GATTAAATAACTTAAGGTTTTGGTTACTTGTGCCTGCTTTGTTTTTGTTATTAAGATCTT
CGTTGGTGGAAAGTGGTGTAGGAACTGGTTGGACCGTTTATCCACCTTTGTCTGGTAATG
TGGCACATTCAGGGGCTTCTGTTGATTTGGCTATTTTTTCATTGCATCTTGCTGGTGCTT
CCTCAATTTTGGGGGCTATTAATTTTATTTCTACTGTGGGTAATATACGTTCGCCTGGGT
TGGTGGCTGAGCGAATTCCTTTGTTTGTGTGAAGAGTTACTGTGACGGCTGTTTTATTGG
TGGCAGCTTTACCTGTTTTAGCTGGTGCTATTACTATGCTTCTTACTGATCGTAATTTAA
ATACGTCATTTTTTGATCCTACTGGAGGTGGTGATCCTATTTTATATATGCATTTGTTTT

>biv_410_1_Radiatula_mouhoti
GAACTTTGTATTTGCTGTTAGCTTTGTGATCTGGTTTAATTGGGTTGGCTCTTAGGTTGT
TAATTCGAGCTGAGTTAGGCCAACCGGGGAGATTGTTAGGAGATGATCAATTATATAATG
TGATTGTAACCGCTCATGCTTTTATAATAATTTTTTTCTTAGTTATACCAATGATGATTG
GTGGATTTGGTAATTGGTTAATCCCTTTAATGATTGGGGCTCCTGATATGGCTTTTCCTC
GATTAAATAACTTAAGGTTTTGGTTACTTGTGCCTGCTTTGTTTTTGTTATTAAGATCTT
CGTTGGTGGAAAGTGGTGTAGGAACTGGTTGGACCGTTTATCCACCTTTGTCTGGTAATG
TGGCACATTCAGGGGCTTCTGTTGATTTGGCTATTTTTTCATTGCATCTTGCTGGTGCTT
CCTCAATTTTGGGGGCTATTAATTTTATTTCTACTGTGGGTAATATACGTTCGCCTGGGT
TGGTGGCTGAGCGAATTCCTTTGTTTGTGTGAAGAGTTACTGTGACGGCTGTTTTATTGG
TGGCAGCTTTACCTGTTTTAGCTGGTGCTATTACTATGCTTCTTACTGATCGTAATTTAA
ATACGTCGTTTTTTGATCCTACTGGAGGTGGTGATCCTATTTTATATATGCATTTGTTTT

>biv_410_2_Radiatula_mouhoti
GAACTTTGTATTTGCTGTTAGCTTTGTGATCTGGTTTAATTGGGTTGGCTCTTAGGTTGT
TAATTCGAGCTGAGTTAGGCCAACCGGGGAGATTGTTAGGAGATGATCAATTATATAATG
TGATTGTAACCGCTCATGCTTTTATAATAATTTTTTTCTTAGTTATACCAATGATGATTG
GTGGATTTGGTAATTGGTTAATCCCTTTAATGATTGGGGCTCCTGATATGGCTTTTCCTC
GATTAAATAACTTAAGGTTTTGGTTACTTGTGCCTGCTTTGTTTTTGTTATTAAGATCTT
CGTTGGTGGAAAGTGGTGTAGGAACTGGTTGGACCGTTTATCCACCTTTGTCTGGTAATG
TGGCACATTCAGGGGCTTCTGTTGATTTGGCTATTTTTTCATTGCATCTTGCTGGTGCTT
CCTCAATTTTGGGGGCTATTAATTTTATTTCTACTGTGGGTAATATACGTTCGCCTGGGT
TGGTGGCTGAGCGAATTCCTTTGTTTGTGTGAAGAATTACTGTGACGGCTGTTTTATTGG
TGGCAGCTTTACCTGTTTTAGCTGGTGCTATTACTATGCTTCTTACTGATCGTAATTTAA
ATACGTCGTTTTTTGATCCTACTGGAGGTGGTGATCCTATTTTATATATGCATTTGTTTT

>biv_260_5_Radiatula_chaudhurii
GAACTTTGTATTTGCTGTTAGCTTTGTGGTCTGGGTTAATTGGGTTGGCTCTTAGGTTGT
TAATTCGAGCTGAGTTAGGTCAACCGGGGAGATTATTAGGAGATGACCAACTATATAATG
TGATTGTAACCGCTCATGCTTTTATGATAATTTTTTTCTTAGTTATACCAATGATGATTG
GTGGATTTGGTAATTGGTTAATTCCATTAATGATTGGGGCCCCTGATATAGCTTTTCCTC
GATTAAATAATTTAAGGTTTTGGTTACTTGTGCCTGCTTTGTTTTTGTTACTAAGATCTT
CATTGGTGGAAAGTGGTGTTGGAACTGGTTGGACTGTTTATCCCCCTTTGTCTGGTAATG
TGGCACATTCAGGGGCTTCTGTTGATTTGGCTATTTTTTCGTTGCATCTTGCTGGTGCTT
CTTCAATTTTAGGGGCTATTAATTTTATTTCTACTGTGGGTAATATACGTTCGCCTGGGT
TGGTGGCTGAGCGAATTCCTTTGTTTGTGTGAAGAGTTACTGTGACGGCTGTTTTATTGG
TGGCAGCTTTACCTGTTTTAGCTGGTGCTATTACTATGCTTCTTACTGATCGTAACTTGA
ACACGTCGTTTTTTGACCCTACTGGTGGTGGTGATCCTATTTTGTATATACACTTGTTTT

>biv_260_9_Radiatula_chaudhurii
GAACTTTGTATTTGCTGTTAGCTTTGTGGTCTGGGTTAATTGGGTTGGCTCTTAGGTTGT
TAATTCGAGCTGAGTTAGGTCAACCGGGGAGATTATTAGGAGATGACCAACTATATAATG
TGATTGTAACCGCTCATGCTTTTATGATAATTTTTTTCTTAGTTATACCAATGATGATTG
GTGGATTTGGTAATTGGTTAATTCCATTAATGATTGGGGCCCCTGATATAGCTTTTCCTC
GATTAAATAATTTAAGGTTTTGGTTACTTGTGCCTGCTTTGTTTTTGTTACTAAGATCTT
CATTGGTGGAAAGTGGTGTTGGAACTGGTTGGACTGTTTATCCCCCTTTGTCTGGTAATG
TGGCACATTCAGGGGCTTCTGTTGATTTGGCTATTTTTTCGTTGCATCTTGCTGGTGCTT
CTTCAATTTTAGGGGCTATTAATTTTATTTCTACTGTGGGTAATATACGTTCGCCTGGGT
TGGTGGCTGAGCGAATTCCTTTGTTTGTGTGAAGAGTTACTGTGACGGCTGTTTTGTTGG
TGGCAGCTTTACCTGTTTTAGCTGGTGCTATTACTATGCTTCTTACTGATCGTAACTTGA
ACACGTCGTTTTTTGACCCTACTGGTGGTGGTGATCCTATTTTGTATATACACTTGTTTT

>biv_421_2_Radiatula_chaudhurii
GAACTTTGTATTTGCTGTTAGCTTTGTGGTCTGGGTTAATTGGGTTGGCTTTTAGGTTGT
TAATTCGAGCTGAGTTAGGTCAACCGGGGAGATTATTAGGAGATGACCAACTATATAATG
TGATTGTAACCGCTCATGCTTTTATGATAATTTTTTTCTTAGTTATACCAATGATGATTG
GTGGATTTGGTAATTGGTTAATTCCATTAATGATTGGGGCCCCTGATATAGCTTTTCCTC
GATTAAATAATTTAAGGTTTTGGTTACTTGTGCCTGCTTTGTTTTTGTTGCTAAGATCTT
CGTTGGTGGAAAGTGGTGTTGGAACTGGTTGGACTGTTTATCCCCCTTTGTCTGGTAATG
TGGCACATTCAGGGGCTTCTGTTGATTTGGCTATTTTTTCGTTGCATCTTGCTGGTGCTT
CCTCAATTTTAGGGGCTATTAATTTTATTTCTACTGTGGGTAATATACGTTCGCCTGGGT
TGGTGGCTGAGCGAATTCCTTTGTTTGTGTGAAGAGTTACTGTGACGGCTGTTTTATTGG
TGGCAGCTTTACCTGTTTTAGCTGGTGCTATTACTATGCTTCTTACTGATCGTAATTTGA
ACACGTCGTTTTTTGACCCTACTGGTGGTGGTGATCCTATTCTGTATATACACTTGTTTT

>biv_604_1_Radiatula_chaudhurii
GAACTTTGTATTTGCTGTTAGCTTTGTGGTCTGGGTTAATTGGGTTGGCTCTTAGGTTGT
TAATTCGAGCTGAGTTAGGTCAACCGGGGAGATTATTAGGAGATGACCAACTATATAATG
TGATTGTAACCGCTCATGCTTTTATGATAATTTTTTTCTTAGTTATACCAATGATGATTG
GTGGATTTGGTAATTGGTTAATTCCATTAATGATTGGGGCTCCTGATATAGCTTTTCCTC
GATTAAATAATTTAAGGTTTTGGTTACTTGTGCCTGCTTTGTTTTTGTTACTAAGATCTT
CATTGGTGGAAAGTGGTGTTGGAACTGGTTGGACTGTTTATCCCCCTTTGTCTGGTAATG
TGGCACATTCAGGGGCTTCTGTTGATTTGGCTATTTTTTCGTTGCATCTTGCTGGTGCTT
CTTCAATTTTAGGGGCTATTAATTTTATTTCTACTGTTGGTAATATACGTTCGCCTGGGT
TGGTGGCTGAGCGAATTCCTTTGTTTGTGTGAAGAGTTACTGTGACGGCTGTTTTATTGG
TGGCAGCTTTACCTGTTTTAGCTGGTGCTATTACTATGCTTCTTACTGATCGTAACTTGA
ACACGTCGTTTTTTGACCCTACTGGTGGTGGTGATCCTATTTTGTATATACACTTGTTTT

>biv_604_2_Radiatula_chaudhurii
GAACTTTGTATTTGCTGTTAGCTTTGTGGTCTGGGTTAATTGGGTTGGCTCTTAGGTTGT
TAATTCGAGCTGAGTTAGGTCAACCGGGGAGATTATTGGGAGATGACCAACTATATAATG
TGATTGTGACCGCTCATGCTTTTATGATAATTTTTTTCTTAGTTATACCAATGATGATTG
GTGGATTTGGTAATTGGTTAATTCCATTAATGATTGGGGCCCCTGATATAGCTTTTCCTC
GATTAAATAATTTAAGGTTTTGGTTACTTGTGCCTGCTTTGTTTTTGTTGCTAAGATCTT
CGTTGGTGGAAAGTGGTGTTGGAACTGGTTGGACTGTTTATCCCCCTTTGTCTGGTAATG
TGGCACATTCAGGGGCTTCTGTTGATTTGGCTATTTTTTCGTTGCATCTTGCTGGTGCTT
CCTCAATTTTAGGGGCTATTAATTTTATTTCTACTGTGGGTAATATGCGTTCGCCTGGGT
TGGTGGCTGAGCGAATTCCTTTGTTTGTGTGAAGAGTTACTGTGACGGCTGTTTTATTGG
TGGCAGCTTTACCTGTTTTAGCTGGTGCTATTACTATGCTTCTTACTGATCGTAATTTAA
ACACGTCTTTTTTTGACCCTACTGGTGGTGGTGATCCTATTTTGTATATACACTTGTTTT

>biv_605_1_Radiatula_chaudhurii
GAACTTTGTATTTGCTGTTAGCTTTGTGGTCTGGGTTAATTGGGTTGGCTCTTAGGTTGT
TAATTCGAGCTGAGTTAGGTCAACCGGGGAGATTATTGGGAGATGACCAACTATATAATG
TGATTGTGACCGCTCATGCTTTTATGATAATTTTTTTCTTAGTTATACCAATGATGATTG
GTGGATTTGGTAATTGGTTAATTCCATTAATGATTGGGGCCCCTGATATAGCTTTTCCTC
GATTAAATAATTTAAGGTTTTGGTTACTTGTGCCTGCTTTGTTTTTGTTGCTAAGATCTT
CGTTGGTGGAAAGTGGTGTTGGAACTGGTTGGACTGTTTATCCCCCTTTGTCTGGTAATG
TGGCACATTCAGGGGCTTCTGTTGATTTGGCTATTTTTTCGTTGCATCTTGCTGGTGCTT
CCTCAATTTTAGGGGCTATTAATTTTATTTCTACTGTGGGTAATATGCGTTCGCCTGGGT
TGGTGGCTGAGCGAATTCCTTTGTTTGTGTGAAGAGTTACTGTGACGGCTGTTTTATTGG
TGGCAGCTTTACCTGTTTTAGCTGGTGCTATTACTATGCTTCTTACTGATCGTAATTTGA
ACACGTCTTTTTTTGACCCTACTGGTGGTGGTGATCCTATTTTGTATATACACTTGTTTT

>biv_606_2_Radiatula_chaudhurii
GAACTTTGTATTTGCTGTTAGCTTTGTGGTCTGGGTTAATTGGGTTGGCTCTTAGGTTGT
TAATTCGAGCTGAGTTAGGTCAACCGGGGAGATTATTAGGAGATGACCAACTATATAATG
TGATTGTAACCGCTCATGCTTTTATGATGATTTTTTTCTTAGTTATACCAATGATGATTG
GTGGATTTGGTAATTGGTTAATTCCATTAATGATTGGGGCTCCTGATATAGCTTTTCCTC
GATTAAATAATTTAAGGTTTTGGTTACTTGTGCCTGCTTTGTTTTTGTTACTAAGATCTT
CATTGGTGGAAAGTGGTGTTGGAACTGGTTGGACTGTTTATCCCCCTTTGTCTGGTAATG
TGGCACATTCAGGGGCTTCTGTTGATTTGGCTATTTTTTCGTTGCATCTTGCTGGTGCTT
CTTCAATTTTAGGGGCTATTAATTTTATTTCTACTGTTGGTAATATACGTTCGCCTGGGT
TGGTGGCTGAGCGAATTCCTTTGTTTGTGTGAAGAGTTACTGTGACGGCTGTTTTATTGG
TGGCAGCTTTACCTGTTTTAGCTGGTGCTATTACTATGCTTCTTACTGATCGTAACTTGA
ACACGTCGTTTTTTGACCCTACTGGTGGTGGTGATCCTATTTTGTATATACACTTGTTTT

>biv_610_2_Radiatula_chaudhurii
GAACTTTGTATTTGCTGTTAGCTTTGTGGTCTGGGTTAATTGGGTTGGCTCTTAGGTTGT
TAATTCGAGCTGAGTTAGGTCAACCGGGGAGATTATTAGGAGATGACCAACTGTATAATG
TGATTGTAACCGCTCATGCTTTTATAATAATTTTTTTCTTAGTTATACCAATGATGATTG
GTGGATTTGGTAATTGGTTAATTCCATTAATGATTGGGGCCCCTGATATAGCTTTTCCTC
GATTAAATAATTTAAGGTTTTGGTTACTTGTGCCTGCTTTGTTTTTGTTACTAAGATCTT
CATTGGTGGAAAGTGGTGTTGGAACTGGTTGGACTGTTTATCCCCCTTTGTCTGGTAATG
TGGCACATTCAGGGGCTTCTGTTGATTTGGCTATTTTTTCGTTGCATCTTGCTGGTGCTT
CTTCAATTTTAGGGGCTATTAATTTTATTTCTACTGTGGGTAATATACGTTCGCCTGGGT
TGGTGGCTGAGCGAATTCCTTTGTTTGTGTGAAGAGTTACTGTAACGGCTGTTTTATTGG
TGGCAGCTTTACCTGTTTTAGCTGGTGCTATTACTATGCTTCTTACTGATCGTAACTTGA
ACACGTCGTTTTTTGACCCTACTGGTGGTGGTGATCCTATTTTGTATATACACTTGTTTT

>biv_913_1_Radiatula_chaudhurii
GAACTTTGTATTTGCTGTTAGCTTTGTGGTCTGGGTTAATTGGGTTGGCTCTTAGGTTGT
TAATTCGAGCTGAGTTAGGTCAACCGGGGAGATTATTAGGAGATGACCAACTATATAATG
TGATTGTAACCGCTCATGCTTTTATGATAATTTTTTTCTTAGTTATACCAATGATGATTG
GTGGATTTGGTAATTGGTTAATTCCGTTAATGATTGGGGCCCCTGATATAGCTTTTCCTC
GATTAAATAATTTAAGGTTTTGGTTACTTGTGCCTGCTTTGTTTTTGTTGCTAAGATCTT
CGTTGGTGGAAAGTGGTGTTGGAACTGGTTGGACTGTTTATCCCCCTTTGTCTGGTAATG
TGGCACATTCAGGGGCTTCTGTTGATTTGGCTATTTTTTCGTTGCATCTTGCTGGTGCTT
CCTCAATTTTAGGGGCTATTAATTTTATTTCTACTGTGGGTAATATGCGTTCGCCTGGGT
TGGTGGCTGAGCGAATTCCTTTGTTTGTGTGAAGAGTTACTGTGACGGCTGTTTTATTGG
TGGCAGCTTTACCTGTTTTAGCTGGTGCTATTACTATGCTTCTTACTGATCGTAATTTAA
ACACGTCGTTTTTTGACCCTACTGGTGGTGGTGATCCTATTTTGTATATGCACTTGTTTT

>biv_920_2_Radiatula_chaudhurii
GAACTTTGTATTTGCTGTTAGCTTTGTGGTCTGGGTTAATTGGGTTGGCTCTTAGGTTGT
TAATTCGAGCTGAGTTAGGTCAACCGGGAAGATTATTAGGAGATGACCAACTATATAATG
TGATTGTAACCGCTCATGCTTTTATGATAATTTTTTTCTTAGTTATACCAATGATGATTG
GTGGGTTTGGTAATTGGTTAATTCCATTAATGATTGGGGCCCCTGATATAGCTTTTCCTC
GATTAAATAATTTAAGGTTTTGGTTACTTGTGCCTGCTTTGTTTTTGTTACTAAGTTCTT
CATTGGTGGAAAGTGGTGTTGGAACTGGTTGGACTGTTTATCCCCCTTTGTCTGGTAATG
TGGCACATTCAGGGGCTTCTGTTGATTTGGCTATTTTTTCGTTGCATCTTGCTGGTGCTT
CTTCAATTTTAGGGGCTATTAATTTTATTTCTACTGTGGGTAATATACGTTCGCCTGGGT
TGGTGGCTGAGCGAATTCCTTTGTTTGTGTGAAGAGTTACTGTGACGGCTGTTTTATTGG
TGGCAGCTTTACCTGTTTTAGCTGGTGCTATTACTATGCTTCTTACTGATCGTAACTTGA
ACACGTCGTTTTTTGACCCTACTGGTGGTGGTGATCCTATTTTGTATATACACTTGTTTT

>biv_920_3_Radiatula_chaudhurii
GAACTTTGTATTTGCTGTTAGCTTTGTGGTCTGGGTTAATTGGGTTGGCTCTTAGGTTGT
TAATTCGAGCTGAGTTAGGTCAACCGGGGAGATTATTAGGAGATGACCAACTATATAATG
TGATTGTAACCGCTCATGCTTTTATAATAATTTTTTTCTTAGTTATACCAATGATGATTG
GTGGATTTGGTAATTGGTTAATTCCATTAATGATTGGGGCCCCTGATATAGCTTTTCCTC
GATTAAATAATTTAAGGTTTTGGTTACTTGTGCCTGCTTTGTTTTTGTTACTAAGATCTT
CATTGGTGGAAAGTGGTGTTGGAACTGGTTGGACTGTTTATCCCCCTTTGTCTGGTAATG
TGGCACATTCAGGGGCTTCTGTTGATTTGGCTATTTTTTCGTTGCATCTTGCTGGTGCTT
CTTCAATTTTAGGGGCTATTAATTTTATTTCTACTGTGGGTAATATACGTTCGCCTGGGT
TGGTGGCTGAGCGAATTCCTTTGTTTGTGTGAAGAGTTACTGTGACGGCTGTTTTATTGG
TGGCAGCTTTACCTGTTTTAGCTGGTGCTATTACTATGCTTCTTACTGATCGTAACTTGA
ACACGTCGTTTTTTGACCCTACTGGTGGTGGTGATCCTATTTTGTATATACACTTGTTTT

>biv_107_1_Radiatula_myitkyinae
GAACTTTGTATTTACTATTAGCTTTGTGGTCTGGGTTAATTGGGTTGGCTCTTAGGTTGT
TAATTCGAGCTGAGTTAGGTCAACCGGGGAGATTATTAGGGGATGACCAATTATATAATG
TGATTGTAACCGCTCATGCTTTTATAATAATTTTTTTCTTGGTTATACCAATGATAATTG
GTGGATTTGGTAATTGGTTGATTCCATTAATGATTGGGGCCCCTGATATAGCTTTTCCTC
GGTTAAATAATTTAAGGTTTTGGTTACTTGTGCCTGCTTTGTTTTTGTTATTAAGATCTT
CGTTGGTGGAAAGCGGTGTTGGAACTGGTTGGACTGTTTATCCCCCTTTATCTGGTAATG
TGGCACATTCAGGGGCTTCTGTTGATTTGGCTATTTTTTCATTACATCTTGCTGGTGCTT
CATCAATTTTAGGGGCTATTAATTTTATTTCTACTGTGGGTAATATACGTTCGCCTGGGT
TGGTGGCTGAGCGAATTCCTTTGTTTGTGTGAAGAGTTACTGTGACGGCTGTTTTATTGG
TGGCAGCTTTACCTGTTTTAGCTGGTGCTATTACTATGCTTCTTACTGATCGTAACTTAA
ACACGTCATTTTTTGACCCTACTGGTGGTGGTGATCCTATTTTATATATGCATTTGTTTT

>biv 107_2_Radiatula_myitkyinae
GAACTTTGTATTTACTATTAGCTTTGTGGTCTGGGTTAATTGGGTTGGCTCTTAGGCTGT
TAATTCGAGCTGAGTTAGGTCAACCGGGGAGATTATTAGGGGATGACCAATTATATAATG
TGATTGTAACCGCTCATGCTTTTATAATAATTTTTTTCTTGGTTATACCAATGATAATCG
GTGGATTTGGTAATTGGTTGATTCCATTAATGATTGGGGCCCCTGATATAGCTTTTCCTC
GGTTAAATAATTTAAGGTTTTGGTTACTTGTGCCTGCTTTGTTTTTGTTATTAAGATCTT
CGTTGGTGGAAAGCGGTGTTGGAACTGGTTGGACTGTTTATCCACCTTTGTCTGGTAATG
TGGCACATTCAGGGGCTTCTGTTGATTTGGCTATTTTTTCATTACATCTTGCTGGTGCTT
CATCAATTTTAGGGGCTATTAATTTTATTTCTACTGTGGGTAATATACGTTCGCCTGGGT
TGGTGGCTGAGCGAATTCCTTTGTTTGTGTGAAGAGTTACTGTGACGGCTGTTTTATTGG
TGGCAGCTTTACCTGTTTTAGCTGGTGCTATTACTATGCTTCTTACTGATCGTAACTTAA
ACACGTCATTTTTTGACCCTACTGGTGGTGGTGATCCTATTTTGTATATGCATTTGTTTT

>biv 107_3_Radiatula_myitkyinae
GAACTTTATATTTACTATTAGCTTTGTGGTCTGGGTTAATTGGGTTGGCTCTTAGGTTGT
TAATTCGAGCTGAGTTAGGTCAACCGGGGAGATTATTAGGGGATGACCAATTGTATAATG
TGATCGTAACCGCTCATGCTTTTATAATAATTTTTTTCTTGGTTATACCAATGATAATCG
GTGGATTTGGTAATTGGTTGATTCCATTAATGATTGGGGCCCCTGATATAGCTTTTCCTC
GGTTAAATAATTTAAGGTTTTGGTTACTTGTGCCTGCTTTGTTTTTGTTATTAAGATCTT
CGTTGGTGGAAAGCGGTGTTGGAACTGGTTGGACTGTTTATCCACCTTTGTCTGGTAATG
TGGCACATTCGGGGGCTTCTGTTGATTTGGCTATTTTTTCATTACATCTTGCTGGTGCTT
CATCAATTTTAGGGGCTATTAATTTTATTTCTACTGTGGGTAATATACGTTCGCCTGGGT
TGGTGGCTGAGCGAATTCCTTTGTTTGTGTGAAGAGTTACTGTGACGGCTGTTTTATTGG
TGGCAGCTTTACCTGTTTTAGCTGGTGCTATTACTATGCTTCTTACTGATCGTAACTTAA
ACACGTCATTTTTTGACCCTACTGGTGGTGGTGATCCTATTTTGTATATGCATTTGTTTT

>biv 106_1_Radiatula_myitkyinae
GAACTTTGTATTTACTATCAGCTTTGTGGTCTGGGTTAATTGGGTTGGCTCTTAGGTTGT
TAATTCGAGCTGAGTTAGGTCAACCGGGGAGATTATTAGGGGATGACCAATTGTATAATG
TGATCGTAACCGCTCATGCTTTTATAATAATTTTTTTCTTGGTTATACCAATGATAATCG
GTGGATTTGGTAATTGGTTGATTCCATTAATGATTGGGGCCCCTGATATAGCTTTTCCTC
GGTTAAATAATTTAAGGTTTTGGTTACTTGTGCCTGCTTTGTTTTTGTTATTAAGATCTT
CGTTGGTGGAAAGCGGTGTTGGAACTGGTTGGACTGTTTATCCACCTTTGTCTGGTAATG
TGGCACATTCGGGGGCTTCTGTTGATTTGGCTATTTTTTCATTACATCTTGCTGGTGCTT
CATCAATTTTAGGGGCTATTAATTTTATTTCTACTGTGGGTAATATACGTTCGCCTGGGT
TGGTGGCTGAGCGAATTCCTTTGTTTGTGTGAAGAGTTACTGTGACGGCTGTTTTATTGG
TGGCAGCTTTACCTGTTTTAGCTGGTGCTATTACTATGCTTCTTACTGATCGTAACTTAA
ACACGTCATTTTTTGACCCTACTGGTGGTGGTGATCCTATTTTGTATATCCATTTGTTTT

>biv_106_2_Radiatula_myitkyinae
GAACTTTGTATTTACTATCAGCTTTGTGGTCTGGGTTAATTGGGTTGGCTCTTAGGTTGT
TAATTCGAGCTGAGTTAGGTCAACCGGGGAGATTATTAGGGGATGACCAATTATATAATG
TGATCGTAACCGCTCATGCTTTTATAATAATTTTTTTCTTGGTTATACCAATGATAATCG
GTGGATTTGGTAATTGGTTGATTCCATTAATGATTGGGGCCCCTGATATAGCTTTTCCTC
GGTTAAATAATTTAAGGTTTTGGTTACTTGTGCCTGCTTTGTTTTTGTTATTAAGATCTT
CGTTGGTGGAAAGCGGTGTTGGAACTGGTTGGACTGTTTATCCACCTTTGTCTGGTAATG
TGGCACATTCGGGGGCTTCTGTTGATTTGGCTATTTTTTCATTACATCTTGCTGGTGCTT
CATCAATTTTAGGGGCTATTAATTTTATTTCTACTGTGGGTAATATACGTTCGCCTGGGT
TGGTGGCTGAGCGAATTCCTTTGTTTGTGTGAAGAGTTACTGTGACGGCTGTTTTATTGG
TGGCAGCTTTACCTGTTTTAGCTGGTGCTATTACTATGCTTCTTACTGATCGTAACTTAA
ACACGTCATTTTTTGACCCTACTGGTGGTGGTGATCCTATTTTGTATATCCATTTGTTTT

>biv_971_1_Radiatula_myitkyinae
GAACTTTGTATTTACTATTAGCTTTGTGGTCTGGGTTAATTGGGTTGGCTCTTAGGTTGT
TGATTCGAGCTGAGTTAGGTCAACCGGGGAGATTATTAGGGGATGACCAATTATATAATG
TGATTGTAACCGCTCATGCTTTTATGATAATTTTTTTCTTGGTTATACCAATGATAATCG
GTGGATTTGGTAATTGGTTGATTCCATTAATGATTGGGGCTCCTGATATAGCTTTTCCTC
GGTTAAATAATTTAAGGTTTTGGTTACTTGTGCCTGCTTTGTTTTTGTTATTAAGATCTT
CGTTGGTGGAAAGCGGTGTTGGAACTGGTTGGACTGTTTATCCACCTTTGTCTGGTAATG
TGGCACATTCAGGGGCTTCTGTTGATTTGGCTATTTTTTCATTACATCTTGCTGGTGCTT
CATCAATTTTAGGGGCTATTAATTTTATTTCTACTGTGGGTAACATACGTTCGCCTGGGT
TGGTGGCTGAGCGAATTCCTTTGTTTGTGTGAAGAGTTACTGTGACGGCTGTTTTATTGG
TGGCAGCTTTACCTGTTTTAGCTGGTGCTATTACTATGCTTCTTACTGATCGTAACTTAA
ACACGTCATTTTTTGACCCTACTGGTGGTGGTGATCCTATTTTGTATATGCATTTGTTTT

>biv_971_2_Radiatula_myitkyinae
GAACTTTGTATTTACTATTAGCTTTGTGGTCTGGGTTAATTGGGTTGGCTCTTAGGTTGT
TAATTCGAGCTGAGTTAGGTCAACCGGGGAGATTATTAGGGGATGACCAATTATATAATG
TGATTGTAACCGCTCATGCTTTTATAATAATTTTTTTCTTGGTTATACCAATGATAATCG
GTGGATTTGGTAATTGGTTGATTCCATTAATGATTGGGGCCCCTGATATAGCTTTTCCTC
GGTTAAATAATTTAAGGTTTTGGTTACTTGTGCCTGCTTTGTTTTTGTTATTAAGATCTT
CGTTGGTGGAAAGCGGTGTTGGAACTGGTTGGACTGTTTATCCCCCTTTGTCTGGTAATG
TGGCACATTCAGGGGCTTCTGTTGATTTGGCTATTTTTTCATTACATCTTGCTGGTGCTT
CATCAATTTTAGGGGCTATTAATTTTATTTCTACTGTGGGTAATATACGTTCGCCTGGGT
TGGTGGCTGAGCGAATTCCTTTGTTTGTGTGAAGAGTTACTGTGACGGCTGTTTTATTGG
TGGCAGCTTTACCTGTTTTAGCTGGTGCTATTACTATGCTTCTTACTGATCGTAATTTAA
ACACGTCATTTTTTGACCCTACTGGTGGTGGTGATCCTATTTTGTATATGCATTTGTTTT

>biv_971_3_Radiatula_myitkyinae
GAACTTTGTATTTACTATTAGCTTTGTGGTCTGGGTTAATTGGGTTGGCTCTTAGGTTGT
TAATTCGAGCTGAGTTAGGTCAACCGGGGAGATTATTAGGGGATGACCAATTATATAATG
TGATTGTAACCGCTCATGCTTTTATAATAATTTTTTTCTTGGTTATACCAATGATAATCG
GTGGATTTGGTAATTGGTTGATTCCATTAATGATTGGGGCCCCTGATATAGCTTTTCCTC
GGTTAAATAATTTAAGGTTTTGGTTACTTGTGCCTGCTTTGTTTTTGTTATTAAGATCTT
CGTTGGTGGAAAGCGGTGTTGGAACTGGTTGGACTGTTTATCCCCCTTTGTCTGGTAATG
TGGCACATTCAGGGGCTTCTGTTGATTTGGCTATTTTTTCATTACATCTTGCTGGTGCTT
CATCAATTTTAGGGGCTATTAATTTTATTTCTACTGTGGGTAATATACGTTCGCCTGGGT
TGGTGGCTGAGCGAATTCCTTTGTTTGTGTGAAGAGTTACTGTGACGGCTGTTTTATTGG
TGGCAGCTTTACCTGTTTTAGCTGGTGCTATTACTATGCTTCTTACTGATCGTAACTTAA
ACACGTCATTTTTTGACCCTACTGGTGGTGGTGATCCTATTTTGTATATGCATTTGTTTT

>biv_671_1_Radiatula_crispisulcata
GAACTTTGTATTTGTTGTTAGCTTTGTGGTCTGGGTTAATTGGGTTGGCTCTAAGGTTGT
TAATTCGAGCTGAGTTAGGTCAACCTGGGAGGTTATTAGGAGATGACCAATTATATAATG
TGATTGTAACTGCTCATGCCTTTATAATAATTTTTTTCTTAGTTATACCAATGATGATTG
GTGGATTTGGTAATTGGTTAATCCCATTAATGATTGGGGCTCCTGATATGGCTTTTCCTC
GATTAAATAACTTAAGGTTTTGGTTACTTGTGCCTGCTTTGTTTTTGTTATTAAGATCTT
CGTTGGTAGAAAGTGGTGTTGGAACCGGTTGGACTGTTTACCCTCCTTTGTCAGGTAATG
TGGCACATTCGGGGGCTTCTGTTGATTTGGCTATTTTTTCATTGCATCTCGCTGGTGCTT
CATCAATTTTGGGGGCTATTAACTTTATTTCTACTGTGGGGAATATACGTTCACCTGGGT
TGGTAGCTGAGCGAATTCCTTTGTTTGTATGAAGAGTTACTGTGACGGCTGTTTTGTTGG
TGGCAGCTTTACCTGTTTTGGCTGGTGCTATTACTATGCTTCTTACTGATCGTAATTTAA
ATACGTCGTTTTTTGATCCTACTGGTGGTGGTGATCCTATTTTGTATATGCATTTGTTTT

>biv_671_3_Radiatula_crispisulcata
GAACTTTGTATTTGTTGTTAGCTTTGTGGTCTGGGTTAATTGGGTTGGCTCTAAGGTTGT
TAATTCGAGCTGAGTTAGGTCAACCTGGGAGGTTATTAGGAGATGACCAATTATATAATG
TGATTGTAACTGCTCATGCCTTTATAATAATTTTTTTCTTAGTTATACCAATGATGATTG
GTGGATTTGGTAATTGGTTAATCCCATTAATGATTGGGGCTCCTGATATGGCTTTTCCTC
GATTAAATAACTTAAGGTTTTGGTTACTTGTGCCTGCTTTGTTTTTGTTATTAAGATCTT
CGTTGGTAGAAAGTGGTGTTGGAACCGGTTGGACTGTTTACCCTCCTTTGTCAGGTAATG
TGGCACATTCGGGGGCTTCTGTTGATTTGGCTATTTTTTCATTGCATCTCGCTGGTGCTT
CATCAATTTTGGGGGCTATTAACTTTATTTCTACTGTGGGGAATATACGTTCACCTGGGT
TGGTAGTTGAGCGAATTCCTTTGTTTGTATGAAGAGTTACTGTGACGGCTGTTTTGTTGG
TGGCAGCTTTACCTGTTTTGGCTGGTGCTATTACTATGCTTCTTACTGATCGTAATTTAA
ATACGTCGTTTTTTGATCCTACTGGTGGTGGTGATCCTATTTTGTATATGCATTTGTTTT

>biv_360_1_Radiatula_mouhoti_haungthayawensis
GAACTTTATATTTGCTGTTAGCTTTGTGATCTGGCTTAATTGGGTTGGCTCTTAGGTTGT
TAATTCGAGCTGAGTTAGGCCAACCGGGGAGATTGTTAGGAGATGATCAATTATATAATG
TGATTGTAACCGCTCATGCTTTTATAATAATTTTTTTCTTAGTTATACCAATGATAATTG
GTGGATTTGGTAATTGGTTAATTCCATTAATGATTGGGGCTCCTGATATGGCTTTTCCTC
GATTAAATAACTTGAGGTTTTGGTTACTTGTACCTGCTTTGTTTTTGTTATTAAGATCTT
CGTTGGTGGAAAGTGGTGTAGGAACTGGTTGGACCGTTTATCCACCTTTGTCTGGTAATG
TGGCACATTCAGGGGCTTCTGTTGATCTGGCTATTTTTTCATTACATCTTGCTGGTGCTT
CATCAATTTTGGGGGCTATTAATTTTATTTCTACTGTGGGTAATATACGTTCGCCTGGGT
TGGTGGCTGAGCGAATTCCTTTGTTTGTGTGAAGAGTTACTGTGACGGCTGTTTTATTGG
TGGCAGCTTTACCTGTTTTAGCTGGTGCTATTACTATGCTTCTTACTGATCGTAATTTAA
ATACGTCGTTTTTTGATCCTACTGGAGGTGGTGATCCTATTTTATATATGCATTTGTTTT

>biv_1023_1_Radiatula_mouhoti_haungthayawensis
GAACTTTATATTTGCTGTTAGCTTTGTGATCTGGTTTAATTGGGTTGGCTCTTAGGTTGT
TAATTCGAGCTGAGTTAGGCCAACCGGGGAGATTGTTAGGAGATGATCAATTATATAATG
TGATTGTAACCGCTCATGCTTTTATAATAATTTTTTTCTTAGTTATACCAATGATAATTG
GTGGATTTGGTAATTGGTTAATTCCATTAATGATTGGGGCTCCTGATATGGCTTTTCCTC
GATTAAATAACTTGAGGTTTTGGTTACTTGTACCTGCTTTGTTTTTGTTATTAAGATCTT
CGTTGGTGGAAAGTGGTGTAGGAACTGGTTGGACCGTTTATCCACCTTTGTCTGGTAATG
TGGCACATTCAGGGGCTTCTGTTGATCTGGCTATTTTTTCATTACATCTTGCTGGTGCTT
CATCAATTTTGGGGGCTATTAATTTTATTTCTACTGTGGGTAATATACGTTCGCCTGGGT
TGGTGGCTGAGCGAATTCCTTTGTTTGTGTGAAGAGTTACTGTGACGGCTGTTTTATTGG
TGGCAGCTTTACCTGTTTTAGCTGGTGCTATTACTATGCTTCTTACTGATCGTAATTTAA
ATACGTCGTTTTTTGATCCTACTGGAGGTGGTGATCCTATTTTATATATGCATTTGTTTT

>biv_345_1_Radiatula_chindwinensis
GAACTTTATATTTGTTGTTAGCTTTGTGATCTGGATTAATTGGATTGGCTCTTAGGTTGT
TAATTCGAGCTGAGTTAGGCCAACCGGGGAGATTGTTAGGAGATGATCAATTATATAATG
TAATTGTAACCGCTCATGCTTTTATAATAATTTTTTTCTTAGTTATACCAATGATGATTG
GTGGATTTGGTAATTGATTAATTCCATTAATAATTGGGGCTCCTGATATGGCTTTTCCTC
GACTAAATAATTTAAGGTTTTGGTTACTTGTGCCTGCTTTGTTTTTGTTATTGAGATCTT
CGTTGGTAGAAAGTGGTGTAGGAACTGGTTGGACCGTTTATCCACCTTTGTCTGGTAATG
TGGGACATTCAGGGGCTTCTGTTGATTTGGCTATTTTTTCATTGCATCTTGCTGGTGCTT
CATCAATTTTGGGGGCTATTAATTTTATCTCTACTGTGGGTAATATACGTTCGCCTGGAT
TGGTGGCTGAGCGAATTCCTTTGTTTGTGTGAAGAGTTACTGTGACGGCTGTTTTATTGG
TGGCAGCTTTACCTGTTTTAGCTGGTGCTATTACTATGCTTCTTACTGATCGTAATTTAA
ATACGTCGTTTTTTGACCCTACTGGAGGTGGTGATCCTATTTTGTATATACACTTGTTTT

>biv_357_1_Radiatula_chindwinensis
GAACTTTATATTTGTTGTTAGCTTTGTGATCTGGATTAATTGGATTGGCTCTTAGGTTGT
TAATTCGAGCTGAGTTAGGCCAACCGGGGAGATTATTAGGAGATGATCAATTATATAATG
TAATTGTAACCGCTCATGCTTTTATAATAATTTTTTTCTTAGTTATACCAATGATGATTG
GTGGATTTGGTAATTGATTAATTCCATTAATAATTGGGGCTCCTGATATGGCTTTTCCTC
GACTAAATAATTTAAGGTTTTGGTTACTTGTGCCTGCTTTGTTTTTGTTATTGAGATCTT
CGTTGGTAGAAAGTGGTGTAGGAACTGGTTGGACCGTTTATCCACCTTTGTCTGGTAATG
TGGGACATTCAGGGGCTTCTGTTGATTTGGCTATTTTTTCATTGCATCTTGCTGGTGCTT
CATCAATTTTGGGGGCTATTAATTTTATCTCTACTGTGGGTAATATACGTTCGCCTGGAT
TGGTGGCTGAGCGAATTCCTTTGTTTGTGTGAAGAGTTACTGTGACGGCTGTTTTATTGG
TGGCAGCTTTACCTGTTTTAGCTGGTGCTATTACTATGCTTCTTACTGATCGTAATTTAA
ATACGTCGTTTTTTGACCCTACTGGAGGTGGTGATCCTATTTTGTATATACACTTGTTTT

>biv_357_2_Radiatula_chindwinensis
GAACTTTATATTTGTTGTTAGCTTTGTGATCTGGATTAATTGGATTGGCTCTTAGGTTGT
TAATTCGAGCTGAGTTAGGCCAACCGGGGAGATTGTTAGGAGATGATCAATTATATAATG
TAATTGTAACCGCTCATGCTTTTATAATAATTTTTTTCTTAGTTATACCAATGATGATTG
GTGGATTTGGTAATTGATTAATTCCATTAATAATTGGGGCTCCTGATATGGCTTTTCCTC
GATTAAATAATTTAAGGTTTTGGTTACTTGTGCCTGCTTTGTTTTTGTTATTGAGATCTT
CGTTGGTAGAAAGTGGTGTAGGAACTGGTTGGACCGTTTATCCACCTTTGTCTGGTAATG
TGGGACATTCAGGGGCTTCTGTTGATTTGGCTATTTTTTCATTGCATCTTGCTGGTGCTT
CATCAATTTTGGGGGCTATTAATTTTATCTCTACTGTGGGTAATATACGTTCGCCTGGAT
TGGTGGCTGAGCGAATTCCTTTGTTTGTGTGAAGAGTTACTGTGACGGCTGTTTTATTGG
TGGCAGCTTTACCTGTTTTAGCTGGTGCTATTACTATGCTTCTTACTGATCGTAATTTAA
ATACGTCGTTTTTTGACCCTACTGGAGGTGGTGATCCTATTTTGTATATACACTTGTTTT

>biv_337_3_Radiatula_myitthanensis
GAACTTTGTATTTGCTGTTAGCTTTGTGGTCTGGGTTAATTGGGTTGGCTCTTAGGTTGC
TAATTCGAGCTGAGTTAGGCCAACCGGGGAGATTGTTAGGAGATGATCAATTATATAATG
TGATTGTAACCGCTCATGCTTTTATAATAATTTTTTTCTTAGTTATACCAATGATGATTG
GTGGATTTGGTAATTGATTAATCCCATTAATGATTGGGGCTCCTGATATGGCTTTTCCTC
GATTAAATAATTTAAGGTTTTGGTTACTTGTACCTGCTTTGTTTTTGTTACTAAGATCTT
CGTTGGTGGAAAGCGGTGTAGGAACTGGTTGGACCGTTTATCCACCTTTGTCTGGTAATG
TGGCACATTCGGGGGCTTCTGTTGATTTAGCTATTTTTTCATTGCATCTTGCTGGTGCTT
CGTCGATTTTGGGAGCTATTAACTTTATTTCTACTGTGGGTAATATACGTTCGCCTGGGT
TGGTGGCTGAGCGAATTCCTTTGTTTGTGTGAAGAGTTACTGTGACCGCTGTTTTATTGG
TGGCAGCTTTACCTGTTTTAGCTGGTGCTATTACTATACTTCTTACTGATCGTAATTTAA
ATACGTCGTTTTTTGATCCTACTGGAGGTGGTGATCCTATTTTGTATATACACTTGTTTT

>biv_348_1_Radiatula_myitthanensis
GAACTTTATATTTGTTGTTAGCTTTGTGATCTGGATTAATTGGATTGGCTCTTAGGTTGT
TAATTCGAGCTGAGTTAGGCCAACCGGGGAGATTGTTAGGAGATGATCAATTATATAATG
TGATTGTAACCGCTCATGCTTTTATAATAATTTTTTTCTTAGTTATACCAATGATGATTG
GTGGATTTGGTAATTGATTAATCCCATTAATGATTGGGGCTCCTGATATGGCTTTTCCTC
GATTAAATAATTTAAGGTTTTGGTTACTTGTACCTGCTTTGTTTTTGTTACTAAGATCTT
CGTTGGTGGAAAGCGGTGTAGGAACTGGTTGGACCGTTTATCCACCTTTGTCTGGTAATG
TGGCACATTCGGGGGCTTCTGTTGATTTAGCTATTTTTTCATTGCATCTTGCTGGTGCTT
CGTCGATTTTGGGAGCTATCAACTTTATTTCTACTGTGGGTAATATACGTTCGCCTGGGT
TGGTGGCTGAGCGAATTCCTTTATTTGTGTGAAGAGTTACTGTGACCGCTGTTTTATTGG
TGGCAGCTTTACCTGTTTTAGCTGGTGCTATTACTATACTTCTTACTGATCGTAATTTAA
ATACGTCGTTTTTTGATCCTACTGGAGGTGGTGATCCTATTTTGTATATACACTTGTTTT

>biv_258_1_Indochinella p_pugio
GAACTTTATATTTGCTGTTGGCTTTGTGGTCTGGGCTTATTGGGTTGGCTTTGAGTTTAT
TAATTCGAGCTGAGTTAGGTCAGCCAGGTAGCTTATTAGGTGATGATCAATTATATAATG
TAATTGTGACAGCTCATGCTTTTATAATAATTTTTTTCTTGGTAATGCCAATGATGATTG
GTGGGTTTGGAAATTGGTTAATTCCGCTAATGATTGGAGCTCCTGATATGGCTTTTCCTC
GATTGAATAATTTAAGGTTTTGATTACTTGTGCCTGCTTTGTTTTTATTATTAAGGTCTT
CGTTAGTGGAAAGTGGTGTTGGGACTGGGTGAACTGTTTACCCTCCTCTATCTGGTAATG
TAGCACATTCTGGGGCTTCTGTTGATTTAGCAATTTTTTCATTACATCTTGCTGGTGCTT
CATCAATTTTGGGGGCTATTAATTTTATTTCTACTGTTGGTAATATGCGTTCTCCTGGTT
TAGTTGCTGAGCGAATTCCTTTATTTGTGTGAAGGGTTACTGTAACAGCTGTTTTATTGG
TTGCAGCTTTGCCTGTTCTAGCTGGTGCTATTACTATACTTCTTACTGATCGAAATTTAA
ATACTTCATTTTTTGATCCTACTGGTGGTGGTGATCCTATTTTGTATATACATTTGTTTT

>biv_258_2_Indochinella p_pugio
GAACTTTATATTTGCTGTTGGCTTTGTGGTCTGGGCTTATTGGGTTGGCTTTGAGTTTAT
TAATTCGAGCTGAGTTAGGTCAGCCAGGTAGGTTATTAGGTGATGATCAATTATATAATG
TAATTGTGACAGCTCATGCTTTTATAATAATTTTTTTCTTGGTAATGCCAATGATGATTG
GTGGGTTTGGAAATTGGTTAATTCCGCTAATGATTGGAGCTCCTGATATGGCTTTTCCTC
GATTGAATAATTTAAGGTTTTGATTACTTGTGCCTGCTTTGTTTTTATTATTAAGGTCTT
CGTTAGTGGAAAGTGGTGTTGGGACTGGGTGAACTGTTTACCCTCCTCTATCTGGTAATG
TAGCACATTCTGGGGCTTCTGTTGATTTAGCAATTTTTTCATTACATCTTGCTGGTGCTT
CATCAATTTTGGGGGCTATTAATTTTATTTCTACTGTTGGTAATATGCGTTCTCCTGGTT
TAGTTGCTGAGCGAATTCCTTTATTTGTGTGAAGGGTTACTGTAACAGCTGTTTTATTGG
TTGCAGCTTTGCCTGTTCTAGCTGGTGCTATTACTATACTTCTTACTGATCGAAATTTAA
ATACTTCATTTTTTGATCCTACTGGTGGTGGTGATCCTATTTTGTATATACATTTGTTTT

>JN243899_Indochinella p_pugio
NNNCTTTATATTTGCTGTTGGCTTTGTGGTCTGGGCTTATTGGGTTGGCTTTGAGTTTAT
TAATTCGAGCTGAGTTAGGTCAGCCAGGTAGCTTATTAGGTGATGATCAATTATATAATG
TAATTGTGACAGCTCATGCTTTTATAATAATTTTTTTCTTGGTAATGCCAATGATGATTG
GTGGGTTTGGAAATTGGTTAATTCCGCTAATGATTGGAGCTCCTGATATGGCTTTTCCTC
GATTGAATAATTTAAGGTTTTGATTACTTGTGCCTGCTTTGTTTTTATTATTAAGGTCTT
CGTTAGTGGAAAGTGGTGTTGGGACTGGGTGAACTGTTTACCCTCCTTTATCTGGTAATG
TAGCACATTCTGGGGCTTCTGTTGATTTAGCAATTTTTTCATTACATCTTGCTGGTGCTT
CATCAATTTTGGGGGCTATTAATTTTATTTCTACTGTTGGTAATATGCGTTCTCCTGGTT
TAGTTGCTGAGCGAATTCCTTNATTTGTGTGAAGGGTTACTGTAACAGCTGTTTTATTGG
TTGCAGCTTTGCCTGTTCTAGCTGGTGCTATTACTATACTTCTTACTGATCGAAATTTAA
ATACTTCATTTTTTGATCCTACTGGTGNNNNNNNNNNNNNNNNNNNNNNNNNNNNNNNNN

>biv_251_1_Indochinella_p_viridissima
GAACTTTATATTTGCTGTTGGCTTTGTGGTCTGGGCTGATTGGGTTGGCTTTGAGCCTAT
TAATTCGAGCTGAGTTAGGTCAGCCAGGTAGACTATTAGGTGATGATCAATTATATAATG
TAATTGTGACAGCTCATGCTTTTATAATAATTTTTTTCTTGGTAATGCCAATGATGATTG
GTGGGTTTGGAAATTGATTAATTCCGCTAATGATTGGAGCTCCTGATATGGCTTTTCCTC
GATTGAATAATTTAAGGTTTTGATTACTTGTGCCTGCTTTGTTTTTATTATTAAGGTCTT
CGTTAGTGGAGAGTGGTGTTGGGACTGGGTGGACTGTTTACCCTCCTTTATCTGGTAATG
TGGCACATTCTGGGGCTTCTGTTGATTTAGCCATTTTTTCATTACATCTTGCTGGTGCTT
CATCAATTTTGGGGGCTATTAATTTTATTTCTACTGTTGGTAATATGCGTTCTCCTGGTT
TAGTTGCTGAGCGAATTCCTTTATTTGTGTGAAGGGTTACTGTGACAGCTGTTTTATTGG
TTGCAGCTTTGCCTGTTTTAGCTGGTGCTATTACTATACTTCTTACTGATCGAAACTTAA
ATACTTCATTTTTTGATCCTACTGGTGGTGGTGATCCTATTTTGTATATACATTTGTTTT

>biv_371_3_Indochinella_p_viridissima
GAACTTTATATTTGCTGTTGGCTTTGTGGTCTGGGCTGATTGGGTTGGCTTTGAGCCTAT
TAATTCGAGCTGAGTTAGGTCAGCCAGGTAGACTATTAGGTGATGATCAATTATATAATG
TAATTGTGACAGCTCATGCTTTTATAATAATTTTTTTCTTGGTAATGCCAATGATGATTG
GTGGGTTTGGAAATTGATTAATTCCGCTAATGATTGGAGCTCCTGATATGGCTTTTCCTC
GATTGAATAATTTAAGGTTTTGATTACTTGTGCCTGCTTTGTTTTTATTATTAAGGTCTT
CGTTAGTGGAGAGTGGTGTTGGGACTGGGTGGACTGTTTACCCTCCTTTATCTGGTAATG
TGGCACATTCTGGGGCTTCTGTTGATTTAGCCATTTTTTCATTACATCTTGCTGGTGCTT
CATCAATTTTGGGGGCTATTAATTTTATTTCTACTGTTGGTAATATGCGTTCTCCTGGTT
TAGTTGCTGAGCGAATTCCTTTATTTGTGTGAAGGGTTACTGTAACAGCTGTTTTATTGG
TTGCAGCTTTGCCTGTTTTAGCTGGTGCTATTACTATACTTCTTACTGATCGAAACTTAA
ATACTTCATTTTTTGATCCTACTGGTGGTGGTGATCCTATTTTGTATATACATTTGTTTT

>biv_381_3_Indochinella_p_viridissima
GAACTTTATATTTGCTGTTGGCTTTGTGGTCTGGGCTGATTGGGTTGGCTTTGAGCCTAT
TAATTCGAGCTGAGTTAGGTCAGCCAGGTAGACTATTAGGTGATGATCAATTATATAATG
TAATTGTGACAGCTCATGCTTTTATAATAATCTTTTTCTTGGTAATGCCAATGATGATTG
GTGGGTTTGGAAATTGATTAATTCCGCTAATGATTGGAGCTCCTGATATGGCTTTTCCTC
GATTGAATAATTTAAGGTTTTGATTACTTGTGCCTGCTTTGTTTTTATTATTAAGGTCTT
CGTTAGTGGAGAGTGGTGTTGGGACTGGGTGGACTGTTTACCCTCCTTTATCTGGTAATG
TGGCACATTCTGGGGCTTCTGTTGATTTAGCCATTTTTTCATTACATCTTGCTGGTGCTT
CATCAATTTTGGGGGCTATTAATTTTATTTCTACTGTTGGTAATATGCGTTCTCCTGGTT
TAGTTGCTGAGCGAATTCCTTTATTTGTGTGAAGGGTTACTGTAACAGCTGTTTTATTGG
TTGCAGCTTTGCCTGTTTTAGCTGGTGCTATTACTATACTTCTTACTGATCGAAACTTAA
ATACTTCATTTTTTGATCCTACTGGTGGTGGTGATCCTATTTTGTATATACATTTGTTTT

>biv_147_3_Indochinella_p_daweiensis
GAACTTTATATTTGCTGTTGGCTTTGTGGTCTGGGCTGATTGGGTTGGCTTTGAGCTTAT
TAATTCGAGCTGAGTTAGGTCAGCCGGGTAGACTATTAGGTGATGATCAGTTATATAATG
TAATTGTGACAGCTCATGCTTTTATAATAATTTTTTTCTTGGTAATGCCAATGATGATTG
GTGGGTTTGGAAATTGGTTAATTCCGCTAATGATTGGAGCTCCTGATATGGCTTTTCCTC
GATTGAATAATTTAAGGTTTTGATTACTTGTGCCTGCTTTGTTTTTATTATTAAGGTCTT
CGTTAGTGGAGAGTGGTGTTGGGACTGGGTGGACTGTTTACCCTCCATTATCTGGTAATG
TGGCACATTCTGGGGCTTCTGTTGATTTAGCCATTTTTTCACTACATCTTGCTGGTGCTT
CATCAATTTTGGGGGCTATTAATTTTATTTCTACTGTTGGTAATATGCGTTCTCCTGGTT
TAGTTGCTGAGCGAATTCCTTTATTTGTGTGAAGGGTTACTGTAACAGCTGTTTTATTGG
TTGCAGCTTTGCCTGTCTTAGCTGGTGCTATTACTATACTTCTTACTGATCGAAACTTAA
ATACTTCATTTTTTGATCCTACTGGTGGTGGTGACCCTATTTTATATATACATTTGTTCT

>biv_148_7_Indochinella_p_daweiensis
GAACTTTATATTTGCTGTTGGCTTTGTGGTCTGGGCTGATTGGGTTGGCTTTGAGCTTAT
TAATTCGAGCTGAGTTAGGTCAGCCGGGTAGACTATTAGGTGATGATCAGTTATATAATG
TAATTGTGACAGCTCATGCTTTTATAATAATTTTTTTCTTGGTAATGCCAATGATGATTG
GTGGGTTTGGAAATTGGTTAATTCCGTTAATGATTGGAGCTCCTGATATGGCTTTTCCTC
GATTGAATAATTTAAGGTTTTGATTACTTGTGCCTGCTTTGTTTTTATTATTAAGGTCTT
CGTTAGTGGAGAGTGGTGTTGGGACTGGGTGGACTGTTTACCCTCCATTATCTGGTAATG
TGGCACATTCTGGGGCTTCTGTTGATTTAGCCATTTTTTCACTACATCTTGCTGGTGCTT
CATCAATTTTGGGGGCTATTAATTTTATTTCTACTGTTGGTAATATGCGTTCTCCTGGTT
TAGTTGCTGAGCGAATTCCTTTATTTGTGTGAAGGGTTACTGTAACAGCTGTTTTATTGG
TTGCAGCTTTGCCTGTCTTAGCTGGTGCTATTACTATACTTCTTACTGATCGAAACTTAA
ATACTTCATTTTTTGATCCTACTGGTGGTGGTGACCCTATTTTATATATACATTTGTTCT

>biv_148_15_Indochinella_p_daweiensis
GAACTTTATATTTGCTGTTGGCTTTGTGGTCTGGGCTGATTGGGTTGGCTTTGAGCTTAT
TAATTCGAGCTGAGTTAGGTCAGCCGGGTAGACTATTAGGTGATGATCAGTTATATAATG
TAATTGTGACAGCTCATGCTTTTATAATAATTTTTTTCTTGGTAATGCCAATGATGATTG
GTGGGTTTGGAAATTGGTTAATTCCGCTAATGATTGGAGCTCCTGATATGGCTTTTCCTC
GATTGAATAATTTAAGGTTTTGATTACTTGTGCCTGCTTTGTTTTTATTATTAAGGTCTT
CGTTAGTGGAGAGTGGTGTTGGGACTGGGTGGACTGTTTACCCTCCATTATCTGGTAATG
TGGCACATTCTGGGGCTTCTGTTGATTTAGCCATTTTTTCACTACATCTTGCTGGTGCTT
CATCAATTTTGGGGGCTATTAATTTTATTTCTACTGTTGGTAATATGCGTTCTCCTGGTT
TAGTTGCTGAGCGAATTCCTTTATTTGTGTGAAGGGTTACTGTAACAGCTGTTTTATTGG
TTGCGGCTTTGCCTGTCTTAGCTGGTGCTATTACTATACTTCTTACTGATCGAAACTTAA
ATACTTCATTTTTTGATCCTACTGGTGGTGGTGACCCTATTTTATATATACATTTGTTCT

>biv_361_1_Indochinella_p_paradoxa
GAACTTTGTATTTGCTGTTGGCTTTGTGGTCTGGGCTGATTGGGTTGGCTTTGAGCTTAT
TAATTCGAGCTGAGTTAGGTCAGCCAGGTAGATTATTAGGTGATGATCAATTATATAATG
TAATTGTGACAGCTCATGCTTTTATAATAATTTTTTTCTTGGTAATGCCAATGATGATTG
GTGGGTTTGGAAATTGATTAATTCCGCTAATGATTGGAGCTCCTGATATGGCTTTTCCTC
GATTGAATAATTTAAGGTTTTGATTACTTGTGCCTGCTTTGTTTTTATTACTAAGGTCTT
CGTTAGTGGAGAGTGGTGTTGGGACTGGGTGGACTGTTTATCCTCCTTTATCTGGTAATG
TGGCACATTCTGGGGCTTCTGTTGATTTAGCAATTTTTTCATTGCATCTTGCTGGTGCTT
CATCAATTTTGGGGGCTATTAACTTTATTTCTACTGTTGGTAATATGCGTTCTCCTGGTT
TAGTTGCTGAGCGAATTCCTTTATTTGTGTGAAGGGTTACTGTAACAGCTGTTTTATTGG
TTGCAGCTTTGCCTGTTTTAGCTGGTGCTATTACTATACTTCTTACTGATCGAAATTTAA
ATACTTCGTTTTTTGATCCTACTGGTGGTGGTGATCCTATTTTGTATATACATTTGTTTT
