# Supplementary material for: Follow the Footsteps of Leonardo Fea: An Example of an Integrative Revision of Freshwater Mussel Taxa Described from the Former British Burma (Myanmar)
Source: Hindawi journal article supplement (doi:10.1155/2022/6600359), 2022-05-27
Supplement: f1 [file 6600359.f1.zip › Alignment S3.fasta]

>JX497731_G_laosensis
GGACTTTGTATTTGTTGTTAGCTCTGTGGTCTGGGCTTATTGGGTTGGCTTTGAGATTGT
TAATTCGTGCTGAATTGGGTCAGCCTGGTAGGCTGTTGGGGGACGATCAATTGTATAATG
TTATTGTGACGGCACATGCTTTTATAATGATTTTCTTTTTGGTGATGCCTATGATAATTG
GTGGCTTTGGAAATTGGCTTATTCCCCTTATGATTGGGGCTCCTGATATGGCTTTCCCCC
GACTTAATAATTTGAGGTTTTGGTTACTTGTACCTGCTTTGTTTTTGTTGTTGAGTTCTT
CTTTAGTGGAGAGTGGTGTAGGTACAGGTTGGACTGTCTATCCACCTTTGTCAAGAAATG
TGTCTCATTCGGGGGCTTCTGTTGATTTAGCTATTTTTTCTTTGCATCTTGCGGGTGCTT
CTTCTATTCTTGGGGCCATTAATTTTATTTCGACTGTCGGTAATATGCGTTCACCTGGTG
TGGTTGCTGAGCGAATTCCTTTGTTTGTGTGGGCTGTTACCGTGACAGCTATTTTGTTAG
TGGCGGCGTTACCTGTTTTGGCGGGGGCTATTACTATGTTGTTGACTGATCGTAATTTGA
ACACGTCTTTTTTTGACCCTACCGGGGGGGGTGATCCCATTTTATACATGCATTTGTTTT

>KJ161516_M_dahurica
GGACTTTGTATTTATTGTTGGCTCTATGGTCTGGTCTTATTGGTTTGGCTTTGAGGTTAT
TGATTCGTGCTGAGTTGGGTCAACCCGGTAGTTTGTTGGGGGATGATCAGTTGTACAATG
TTATTGTTACGGCCCATGCTTTTATAATAATTTTCTTTTTGGTTATGCCAATAATAATTG
GTGGTTTTGGTAATTGGCTTATTCCGCTTATGATTGGGGCTCCCGATATGGCTTTTCCTC
GGCTTAATAATTTGAGGTTTTGGCTACTTGTGCCGGCTCTTTTTCTGTTACTGAGCTCTT
CTTTAGTGGAGAGTGGTGTTGGTACTGGGTGGACTGTTTATCCACCTTTGTCAAGGAATG
TTTCTCATTCTGGGGCTTCTGTAGATTTGGCTATTTTTTCTTTACATCTTGCCGGTGCGT
CTTCTATTTTGGGGGCTATTAATTTTATTTCTACTGTTGGTAATATACGCTCTCCGGGTG
TGGTTGCTGAGCGGATTCCTTTGTTTGTGTGAGCTGTCACCGTGACAGCTGTTTTGTTAG
TGGCGGCACTGCCAGTTTTGGCAGGGGCTATTACTATACTATTAACTGACCGTAATTTAA
ATACATCTTTTTTTGACCCGACGGGTGGAGGTGATCCCATTTTGTATATGCACTTGTTTT

>biv_652_1_P_rakhinensis
GAACTTTGTATTTGCTGTTAGCCTTGTGGTCTGGGTTAATTGGGTTAGCTTTAAGGCTTT
TGATTCGAGCTGAGTTAGGTCAGCCTGGGAGGTTATTAGGGGATGATCAGCTTTATAATG
TAATTGTGACGGCTCATGCTTTTATGATAATTTTCTTTTTAGTTATGCCAATGATGATTG
GGGGATTTGGTAATTGGTTAATTCCTTTAATGATTGGGGCTCCTGATATGGCTTTCCCTC
GATTAAATAATTTGAGATTTTGGTTGCTTGTGCCAGCTTTATTCTTGTTGCTGAGGTCTT
CTTTGGTGGAAAGGGGTGTTGGGACTGGATGGACGGTTTATCCCCCTTTGTCTGGGAATG
TGGCTCATTCGGGAGCTTCTGTTGATTTGGCAATTTTTTCTTTACACCTTGCCGGTGCTT
CTTCCATTCTGGGGGCTATTAACTTTATTTCAACTGTCGGTAATATGCGGTCTCCGGGCT
TGGTGGCTGAGCGTATTCCTTTATTTGTGTGAAGGGTAACTGTGACTGCTGTGTTGTTAG
TGGCCGCTTTGCCTGTACTAGCCGGTGCTATTACTATATTACTTACTGATCGTAATTTAA
ATACATCATTTTTTGACCCTACGGGGGGAGGTGATCCTATTTTATATATGCATTTGTTTT

>biv_656_P_rakhinensis
GAACTTTATATTTGCTGTTAGCCTTGTGGTCTGGGTTAATTGGGTTAGCTTTAAGGCTTT
TGATTCGAGCTGAGTTAGGTCAGCCTGGGAGGTTATTAGGGGATGATCAGCTTTATAATG
TAATTGTGACGGCTCATGCTTTTATGATAATTTTCTTTTTAGTTATGCCAATGATGATTG
GGGGATTTGGTAATTGGTTAATTCCTTTAATGATTGGGGCTCCTGATATGGCTTTCCCTC
GATTAAATAATTTGAGATTTTGGTTGCTTGTGCCAGCTTTATTCTTGTTGCTGAGGTCTT
CTTTGGTGGAAAGGGGTGTTGGGACTGGATGGACGGTTTATCCCCCTTTGTCTGGGAATG
TGGCTCATTCGGGAGCTTCTGTTGATTTGGCAATTTTTTCTTTACACCTTGCCGGTGCTT
CTTCCATTCTGGGGGCTATTAACTTTATTTCAACTGTCGGTAATATGCGGTCTCCGGGCT
TGGTGGCTGAGCGCATTCCTTTATTTGTGTGAAGGGTAACTGTGACTGCTGTGTTGTTAG
TGGCCGCTTTGCCTGTACTAGCTGGTGCTATTACTATATTACTTACTGATCGTAATTTAA
ATACATCATTTTTTGACCCTACGGGGGGAGGTGATCCTATTTTATATATGCATTTGTTTT

>biv_660_3_P_rakhinensis
GAACTTTATATTTGCTGTTAGCCCTGTGGTCTGGGTTAATTGGGTTGGCTTTAAGACTTT
TGATTCGAGCTGAGTTAGGTCAGCCTGGGAGGTTATTAGGGGATGATCAGCTTTATAATG
TAATTGTGACGGCTCATGCTTTTATAATAATTTTCTTTTTAGTTATGCCAATGATGATTG
GGGGATTTGGTAATTGGTTAATTCCTTTAATGATTGGGGCTCCTGATATGGCTTTCCCTC
GATTAAATAATTTGAGATTTTGGTTGCTTGTGCCAGCTTTATTCTTGTTGCTGAGGTCTT
CTTTGGTGGAAAGGGGTGTTGGGACTGGATGGACGGTTTATCCCCCTTTGTCTGGGAATG
TGGCTCATTCGGGAGCTTCTGTTGATTTGGCAATTTTTTCTTTACACCTTGCCGGTGCTT
CTTCCATTCTGGGGGCTATTAACTTTATTTCAACTGTTGGTAATATGCGGTCTCCGGGCT
TGGTGGCTGAGCGTATTCCTTTATTTGTGTGAAGGGTAACTGTGACTGCTGTGTTGTTAG
TGGCCGCTTTGCCTGTACTAGCTGGTGCTATTACTATATTACTTACTGATCGTAATTTAA
ATACATCATTTTTTGACCCTACGGGGGGAGGTGATCCTATTTTATATATGCATTTGTTTT

>biv_149_Leoparreysia_tavoyensis
GAACTTTATATTTATTGTTGGCTTTATGGTCTGGATTAATTGGGTTGGCTCTGAGGCTTT
TAATCCGAGCTGAGTTGGGTCAACCTGGTAGGTTATTGGGTGATGATCAACTATACAATG
TCATTGTTACAGCTCATGCTTTTATAATAATTTTCTTTTTGGTAATGCCAATGATGATTG
GAGGGTTTGGTAATTGGTTAATCCCTTTAATAATTGGGGCTCCTGATATGGCTTTTCCTC
GTTTGAATAATCTAAGGTTTTGGCTACTTGTGCCTGCTTTATTTTTACTTTTGAGGTCTT
CCTTGGTAGAGAGTGGTGTTGGAACTGGCTGGACTGTTTATCCTCCTTTATCTGGAAATG
TAGCACATTCTGGGGCTTCTGTGGATTTGGCTATTTTTTCTTTACATCTTGCCGGTGCTT
CTTCTATTTTGGGAGCTATTAATTTTATTTCTACTGTTGGAAATATACGATCTCCTGGAT
TAGTGGCTGAGCGAATTCCATTGTTTGTTTGAAGAGTTACTGTGACAGCTGTTTTGTTAG
TAGCTGCTTTGCCAGTTTTAGCTGGTGCCATTACTATGCTCCTTACCGATCGTAACTTAA
ATACGTCATTCTTTGATCCAACTGGTGGTGGTGATCCTATTTTGTATATACATTTGTTTT

>biv_266_4_Leoparreysia_tavoyensis
GGACTTTGTATTTATTGTTGGCTTTATGGTCTGGATTAATTGGGTTGGCTCTGAGGCTTT
TAATCCGAGCTGAGTTGGGTCAACCTGGTAGGTTATTGGGTGATGATCAACTATACAATG
TCATTGTTACAGCTCATGCTTTTATAATAATTTTCTTTTTGGTAATGCCAATGATGATTG
GAGGATTTGGTAATTGATTAATCCCTTTAATAATTGGAGCTCCTGATATGGCTTTTCCTC
GTTTGAATAATCTAAGGTTTTGGTTACTTGTGCCTGCTTTATTTTTACTTTTGAGGTCTT
CCTTGGTAGAGAGTGGTGTTGGAACTGGCTGGACTGTTTATCCTCCTTTATCTGGAAATG
TAGCACATTCTGGGGCTTCTGTGGATTTGGCTATTTTTTCTTTACATCTTGCCGGTGCTT
CTTCTATTTTGGGAGCTATTAATTTTATTTCTACTGTTGGAAATATACGATCTCCTGGAT
TAGTGGCTGAGCGAATTCCATTATTTGTTTGAAGAGTTACTGTGACAGCTGTTTTGTTAG
TAGCTGCTTTGCCAGTTTTAGCTGGTGCCATTACTATGCTCCTTACCGATCGTAACTTAA
ATACGTCATTCTTTGATCCAACTGGTGGTGGTGATCCTATTTTGTATATACATTTGTTTT

>biv_362_1_Leoparreysia_tavoyensis
GGACTTTATATTTATTGTTGGCTTTATGGTCTGGATTAATTGGGTTGGCTTTGAGGCTTT
TAATCCGGGCTGAGTTGGGTCAACCTGGTAGGTTATTGGGTGATGATCAACTATACAATG
TCATTGTTACAGCTCATGCTTTTATAATAATTTTCTTTTTGGTAATGCCAATGATGATTG
GAGGATTTGGTAATTGGTTAATCCCTTTAATAATTGGGGCTCCTGATATGGCTTTTCCTC
GTTTGAATAATCTAAGGTTTTGGCTACTTGTGCCTGCTTTATTTTTACTTTTGAGGTCTT
CCTTGGTAGAGAGTGGTGTTGGAACTGGCTGGACTGTTTATCCTCCTTTATCTGGAAATG
TAGCACATTCTGGGGCTTCTGTGGATTTGGCTATTTTTTCTTTACATCTTGCCGGTGCTT
CTTCTATTTTGGGAGCTATTAATTTTATTTCTACTGTTGGAAATATACGATCTCCTGGAT
TAGTGGCTGAGCGAATTCCATTATTTGTTTGAAGAGTTACTGTGACAGCTGTTTTGTTAG
TAGCTGCTTTGCCAGTTTTAGCTGGTGCCATTACTATGCTCCTTACCGATCGTAACTTAA
ATACATCATTCTTTGATCCAACTGGTGGTGGTGATCCTATTTTGTATATACATTTGTTTT

>biv_367_1_Leoparreysia_tavoyensis
GGACTTTATATTTATTGTTGGCTTTATGGTCTGGATTAATTGGGTTGGCTCTGAGGCTTT
TAATCCGGGCTGAGTTGGGTCAACCTGGTAGGTTATTGGGTGATGATCAACTATACAATG
TCATTGTTACAGCTCATGCTTTTATAATAATTTTCTTTTTGGTAATGCCAATGATGATTG
GAGGATTTGGTAATTGGTTAATTCCTTTAATAATTGGGGCTCCTGATATGGCTTTTCCTC
GTTTGAATAATCTAAGGTTTTGGCTACTTGTGCCTGCTTTGTTTTTACTTTTGAGGTCTT
CCTTGGTAGAGAGTGGTGTTGGAACTGGCTGGACTGTTTATCCTCCTTTATCTGGAAATG
TAGCACATTCTGGGGCTTCTGTGGATTTGGCTATTTTTTCTTTACATCTTGCCGGTGCTT
CTTCTATTTTGGGAGCTATTAATTTTATTTCTACTGTTGGAAATATACGATCTCCTGGAT
TAGTGGCTGAGCGAATTCCATTATTTGTTTGAAGAGTTACTGTGACAGCTGTTTTGTTAG
TAGCTGCTTTGCCAGTTTTAGCTGGTGCCATTACTATGCTCCTTACCGATCGTAACTTAA
ATACATCATTCTTTGATCCAACTGGTGGTGGTGATCCTATTTTGTATATACATTTGTTTT

>biv_367_3_Leoparreysia_tavoyensis
GGACTTTATACTTATTGTTGGCTTTATGGTCTGGATTAATTGGGTTGGCTCTAAGGCTTT
TAATCCGGGCTGAGTTGGGTCAACCTGGTAGGTTATTAGGTGATGATCAACTATACAATG
TCATTGTTACAGCTCATGCTTTTATAATAATTTTCTTTTTGGTAATGCCAATGATGATTG
GAGGATTTGGTAATTGGTTAATCCCTTTAATAATTGGGGCTCCTGATATGGCTTTTCCTC
GTTTGAATAATCTAAGGTTTTGGCTACTTGTGCCTGCTTTATTTTTACTTTTGAGGTCTT
CCTTGGTAGAGAGTGGTGTTGGAACTGGCTGGACTGTTTATCCTCCTTTATCTGGAAATG
TAGCACATTCTGGGGCTTCTGTGGATTTGGCTATTTTTTCTTTACATCTTGCCGGTGCTT
CTTCTATTTTGGGAGCTATTAATTTTATTTCTACTGTTGGAAATATACGATCTCCTGGAT
TAGTGGCTGAGCGAATTCCATTATTTGTTTGAAGAGTTACTGTGACAGCTGTTTTGTTAG
TAGCTGCTTTGCCAGTTTTAGCTGGTGCCATTACTATGCTTCTTACCGATCGTAACTTAA
ATACATCATTCTTTGATCCAACTGGTGGTGGTGATCCTATTTTGTATATACATTTGTTTT

>biv_425_1_Leoparreysia_tavoyensis
GGACTTTGTATTTATTGTTGGCTTTATGGTCTGGATTAATTGGGTTGGCTCTGAGGCTTT
TAATCCGAGCTGAGTTGGGTCAACCTGGTAGGTTATTGGGTGATGATCAACTATACAATG
TCATTGTTACAGCTCATGCTTTTATAATAATTTTCTTTTTGGTAATGCCAATGATGATTG
GAGGATTTGGTAATTGATTAATCCCTTTAATAATTGGGGCTCCTGATATGGCTTTTCCTC
GTTTGAATAATCTAAGGTTTTGGCTACTTGTGCCTGCTTTATTTTTACTTTTGAGGTCTT
CCTTGGTAGAGAGTGGTGTTGGAACTGGCTGGACTGTTTATCCTCCTTTATCTGGAAATG
TAGCACATTCTGGGGCTTCTGTGGATTTGGCTATTTTTTCTTTACATCTTGCCGGTGCTT
CTTCTATTTTGGGAGCTATTAATTTTATTTCTACTGTTGGAAATATACGATCTCCTGGAT
TAGTGGCTGAGCGAATTCCATTATTTGTTTGAAGAGTTACTGTGACAGCTGTTTTGTTAG
TAGCTGCTTTGCCAGTTTTAGCTGGTGCCATTACTATGCTCCTTACCGATCGTAATTTAA
ATACGTCATTCTTTGATCCAACTGGTGGTGGTGATCCTATTTTGTATATACATTTGTTTT

>biv_447_1_Leoparreysia_tavoyensis
GGACTTTGTATTTATTGTTGGCTTTATGGTCTGGATTAATTGGGTTGGCTCTGAGGCTTT
TAATCCGAGCTGAGTTGGGTCAACCTGGTAGGTTATTGGGTGATGATCAACTATACAATG
TCATTGTTACAGCTCATGCTTTTATAATAATTTTCTTTTTGGTAATGCCAATGATGATTG
GAGGATTTGGTAATTGATTAATCCCTTTAATAATTGGGGCTCCTGATATGGCTTTTCCTC
GTTTGAATAATCTAAGGTTTTGGCTACTTGTGCCTGCTTTATTTTTACTTTTGAGGTCTT
CCTTGGTAGAGAGTGGTGTTGGAACTGGCTGGACTGTTTATCCTCCTTTATCTGGAAATG
TAGCACATTCTGGGGCTTCTGTGGATTTGGCTATTTTTTCTTTACATCTTGCCGGTGCTT
CTTCTATTTTGGGAGCTATTAATTTTATTTCTACTGTTGGAAATATACGATCTCCTGGAT
TAGTGGCTGAGCGAATTCCATTATTTGTTTGAAGAGTTACTGTGACAGCTGTTTTGTTGG
TAGCTGCTTTGCCAGTTTTAGCTGGTGCCATTACTATGCTCCTTACCGATCGTAATTTAA
ATACGTCATTCTTTGATCCAACTGGTGGTGGTGATCCTATTTTGTATATACATTTGTTTT

>biv_447_2_Leoparreysia_tavoyensis
GGACTTTGTATTTATTGTTGGCTTTATGGTCTGGATTAATTGGGTTGGCTCTGAGGCTTT
TAATCCGAGCTGAGTTGGGTCAACCTGGTAGGTTATTGGGTGATGATCAACTATACAATG
TCATTGTTACAGCTCATGCTTTTATAATAATTTTCTTTTTGGTAATGCCAATGATGATTG
GAGGATTTGGTAATTGATTAATCCCTTTAATAATTGGGGCTCCTGATATGGCTTTTCCTC
GTTTGAATAATCTAAGGTTTTGGCTACTTGTGCCTGCTTTATTTTTACTTTTGAGGTCTT
CCTTGGTAGAGAGTGGTGTTGGAACTGGCTGGACTGTTTATCCTCCTTTATCTGGAAATG
TAGCACATTCTGGGGCTTCTGTGGATTTGGCTATTTTTTCTTTACATCTTGCCGGTGCTT
CTTCTATTTTGGGAGCTATTAATTTTATTTCTACTGTTGGAAATATACGATCTCCTGGAT
TAGTGGCTGAGCGAATTCCATTATTTGTTTGAAGAGTTACTGTGACAGCTGTTTTGTTAG
TAGCTGCTTTGCCAGTTTTAGCTGGTGCCATTACTATGCTCCTTACCGATCGTAACTTAA
ATACGTCATTCTTTGATCCAACTGGTGGTGGTGATCCTATTTTGTATATACATTTGTTTT

>biv_634_1_Leoparreysia_tavoyensis
GGACTTTATATTTATTGTTGGCTTTATGGTCTGGATTAATTGGGTTGGCTCTGAGGCTTT
TGATCCGGGCTGAGTTGGGTCAACCTGGTAGGTTATTGGGTGATGATCAACTATACAATG
TCATTGTTACAGCTCATGCTTTTATAATAATTTTCTTTTTGGTAATGCCAATGATGATTG
GAGGATTTGGTAATTGGTTAATCCCTTTAATAATTGGGGCTCCTGATATGGCTTTTCCTC
GTTTGAATAATCTAAGGTTTTGGCTACTTGTGCCTGCTTTATTTTTACTTTTGAGGTCTT
CCTTGGTAGAGAGTGGTGTTGGAACTGGCTGGACTGTTTATCCTCCTTTATCTGGAAATG
TAGCACATTCTGGGGCTTCTGTGGATTTGGCTATTTTTTCTTTACATCTTGCCGGTGCTT
CTTCTATTTTGGGAGCTATTAATTTTATTTCTACTGTTGGAAATATACGATCTCCTGGAT
TAGTGGCTGAGCGAATTCCATTATTTGTTTGAAGAGTTACTGTGACAGCTGTTTTGTTAG
TAGCTGCTTTGCCAGTTTTAGCTGGTGCCATTACTATGCTCCTTACCGATCGTAACTTAA
ATACATCATTCTTTGATCCAACTGGTGGTGGTGATCCTATTTTATATATACATTTGTTTT

>biv_646_2_Leoparreysia_tavoyensis
GGACTTTATATTTATTGTTGGCTTTATGGTCTGGATTAATTGGGTTGGCTCTGAGGCTTT
TAATCCGGGCTGAGTTGGGTCAACCTGGTAGGTTATTGGGTGATGATCAACTATACAATG
TCATTGTTACAGCTCATGCTTTTATAATAATTTTCTTTTTGGTAATGCCAATGATGATTG
GAGGATTTGGTAATTGGTTAATCCCTTTAATAATTGGGGCTCCTGATATGGCTTTTCCTC
GTTTGAATAATCTAAGGTTTTGGCTACTTGTGCCTGCTTTATTTTTACTTTTGAGGTCTT
CCTTGGTAGAGAGTGGTGTTGGAACTGGCTGGACTGTTTATCCTCCTTTATCTGGAAATG
TAGCACATTCTGGGGCTTCTGTGGATTTGGCTATTTTTTCTTTACATCTTGCCGGTGCTT
CTTCTATTTTGGGAGCTATTAATTTTATTTCTACTGTTGGAAATATACGATCTCCTGGAT
TAGTGGCTGAGCGAATTCCATTATTTGTTTGAAGAGTTACTGTGACAGCTGTTTTGTTAG
TAGCTGCTTTGCCAGTTTTAGCTGGTGCCATTACTATGCTCCTTACCGATCGTAACTTAA
ATACGTCATTCTTTGATCCAACTGGTGGTGGTGATCCTATTTTGTATATACATTTGTTTT

>biv_249_Leoparreysia_canefrii
GGACTTTATATCTTTTGTTGGCTTTGTGGTCTGGATTAATTGGGTTGGCTTTGAGGCTTT
TAATTCGAGCTGAGTTAGGACAACCTGGTAGGTTATTGGGTGATGATCAATTATATAATG
TTATTGTTACGGCTCATGCTTTTATAATAATTTTCTTTTTGGTAATGCCAATAATGATTG
GAGGATTTGGTAATTGGTTGATTCCTTTAATGATTGGGGCTCCTGATATAGCTTTCCCTC
GTCTGAATAATTTAAGGTTTTGGTTACTTGTACCTGCTTTATTTTTGCTTTTGAGGTCTT
CTTTGGTAGAGAGTGGTGTTGGAACTGGTTGGACTGTTTATCCTCCTTTGTCTGGAAACG
TAGCACATTCTGGGGCCTCTGTGGATTTAGCTATTTTCTCTTTACATCTTGCCGGTGCTT
CTTCTATTTTAGGAGCTATTAATTTTATTTCTACTGTTGGAAATATACGGTCCCCTGGAA
TAATAGCTGAGCGAATTCCATTATTTGTTTGAAGTGTTACTGTGACAGCTGTTTTATTAG
TAGCTGCTTTACCAGTTTTAGCTGGTGCCATTACTATGCTTCTTACCGATCGTAACTTGA
ATACGTCATTTTTTGATCCAACTGGTGGTGGTGATCCCATTTTGTACATACATTTGTTCT

>biv_252_1_Leoparreysia_canefrii
GGACTTTATATCTTTTGTTGGCTTTGTGGTCTGGATTAATTGGGTTGGCTTTGAGGCTTT
TAATTCGAGCTGAGTTAGGACAACCTGGTAGGTTATTGGGTGATGATCAATTATATAATG
TTATTGTTACGGCTCATGCTTTTATAATAATTTTCTTTTTGGTAATGCCAATAATGATTG
GAGGATTTGGTAATTGGTTGATTCCTTTAATGATTGGGGCTCCTGATATAGCTTTCCCTC
GTCTGAATAATTTAAGGTTTTGGTTACTTGTACCTGCTTTATTTTTGCTTTTGAGGTCTT
CTTTGGTAGAGAGTGGTGTTGGAACTGGTTGGACTGTTTATCCTCCTTTGTCTGGAAACG
TAGCACATTCTGGGGCCTCTGTGGATTTAGCTATTTTCTCTTTACATCTTGCCGGTGCTT
CTTCTATTTTAGGAGCTATTAATTTTATTTCTACTGTTGGAAATATACGGTCCCCTGGAA
TAGTAGCTGAGCGAATTCCATTATTTGTTTGAAGTGTTACTGTGACAGCTGTTTTATTAG
TAGCTGCTTTACCAGTTTTAGCTGGTGCCATTACTATGCTTCTTACCGATCGTAACTTGA
ATACGTCATTTTTTGATCCAACTGGTGGTGGTGATCCCATTTTGTACATACATTTGTTCT

>biv_252_2_Leoparreysia_canefrii
GGACTTTATATCTTTTGTTGGCTTTGTGGTCTGGATTAATTGGGTTGGCTTTGAGGCTTT
TAATTCGAGCTGAGTTAGGACAACCTGGTAGGTTATTGGGTGATGATCAATTATATAATG
TTATTGTTACGGCTCATGCTTTTATAATAATTTTCTTTTTGGTAATGCCAATAATGATTG
GAGGATTTGGTAATTGGTTGATTCCTTTAATGATTGGGGCTCCTGATATAGCTTTCCCTC
GTCTGAATAATTTAAGGTTTTGGTTACTTGTACCTGCTTTATTTTTGCTTTTGAGGTCTT
CTTTGGTAGAGAGTGGTGTTGGAACTGGTTGGACTGTTTATCCTCCTTTGTCTGGAAACG
TAGCACATTCTGGGGCCTCTGTGGATTTAGCTATTTTCTCTTTACATCTTGCCGGTGCTT
CTTCTATTTTAGGAGCTATTAATTTTATTTCTACTGTTGGAAATATACGGTCTCCTGGAT
TAGTAGCTGAGCGAATTCCATTATTTGTTTGAAGTGTTACTGTGACAGCTGTTTTATTAG
TAGCTGCTTTACCAGTTTTAGCTGGTGCCATTACTATGCTTCTTACCGATCGTAACTTGA
ATACGTCATTTTTTGATCCAACTGGTGGTGGTGATCCCATTTTGTACATACATTTGTTCT

>biv_252_3_Leoparreysia_canefrii
GGACTTTATATCTTTTGTTGGCTTTGTGGTCTGGATTAATTGGGTTGGCTTTGAGGCTTT
TAATTCGAGCTGAGTTAGGACAACCTGGTAGGTTATTGGGTGATGATCAATTATATAATG
TTATTGTTACGGCTCATGCTTTTATAATAATTTTCTTTTTGGTAATGCCAATAATGATTG
GAGGATTTGGTAATTGGTTGATTCCTTTAATGATTGGGGCTCCTGATATAGCTTTCCCTC
GTCTGAATAATTTAAGGTTTTGGTTACTTGTACCTGCTTTATTTTTGCTTTTGAGGTCTT
CTTTGGTAGAGAGTGGTGTTGGAACTGGTTGGACTGTTTATCCTCCTTTGTCTGGAAACG
TAGCACATTCTGGGGCCTCTGTGGATTTAGCTATTTTTTCTTTACATCTTGCCGGTGCTT
CTTCTATTTTAGGAGCTATTAATTTTATTTCTACTGTTGGAAATATACGGTCTCCTGGAT
TAGTAGCTGAGCGAATTCCATTATTTGTTTGAAGTGTTACTGTGACAGCTGTTTTATTAG
TAGCTGCTTTACCAGTTTTAGCTGGTGCCATTACTATGCTTCTTACCGATCGTAACTTGA
ATACGTCATTTTTTGATCCAACTGGTGGTGGTGATCCCATTTTGTACATACATTTGTTCT

>biv_254_4_Leoparreysia_canefrii
GGACTTTATATCTTTTGTTGGCTTTGTGGTCTGGATTAATTGGGTTGGCTTTGAGGCTTT
TAATTCGAGCTGAGTTAGGACAACCTGGTAGGTTATTGGGTGATGATCAATTATATAATG
TTATTGTTACGGCTCATGCTTTTATAATAATTTTCTTTTTGGTAATGCCAATAATGATTG
GAGGATTTGGTAATTGGTTGATTCCTTTAATGATTGGGGCTCCTGATATAGCTTTCCCTC
GTCTGAATAATTTAAGGTTTTGGTTACTTGTACCTGCTTTATTTTTGCTTTTGAGGTCTT
CTTTGGTAGAGAGTGGTGTTGGAACTGGTTGGACTGTTTATCCTCCTTTGTCTGGAAACG
TAGCACATTCTGGGGCCTCTGTGGATTTAGCTATTTTCTCTTTACATCTTGCCGGTGTTT
CTTCTATTTTAGGAGCTATTAATTTTATTTCTACTGTTGGAAATATACGGTCCCCTGGAA
TAGTAGCTGAGCGAATTCCATTATTTGTTTGAAGTGTTACTGTGACAGCTGTTTTATTAG
TAGCTGCTTTACCAGTTTTAGCTGGTGCCATTACTATGCTTCTTACCGATCGTAACTTGA
ATACGTCATTTTTTGATCCAACTGGTGGTGGTGATCCCATTTTGTACATACATTTGTTCT

>biv_340_1_Leoparreysia_canefrii
GGACTTTATATCTTTTGTTGGCTTTGTGGTCTGGATTAATTGGGTTGGCTTTGAGGCTTT
TAATTCGAGCTGAGTTAGGACAACCTGGTAGGTTATTGGGTGATGATCAACTATATAATG
TTATTGTTACGGCTCATGCTTTTATAATAATTTTCTTTTTGGTAATGCCAATAATGATTG
GAGGATTTGGTAATTGGTTGATTCCTTTAATGATTGGGGCTCCTGATATAGCTTTCCCTC
GTCTAAATAATTTAAGGTTTTGGCTACTTGTACCTGCTTTATTTTTGCTTTTGAGGTCTT
CTTTGGTAGAGAGTGGTGTTGGAACTGGTTGGACTGTTTATCCTCCTTTGTCTGGAAACG
TAGCACATTCTGGGGCCTCTGTGGATTTAGCTATTTTCTCTTTACATCTTGCTGGTGCTT
CTTCTATTTTAGGAGCTATTAATTTTATTTCTACTGTTGGAAATATACGGTCTCCTGGAT
TAGTAGCTGAGCGAATTCCATTATTTGTTTGAAGTGTTACTGTGACAGCTGTTTTATTAG
TGGCTGCTTTACCAGTTTTAGCTGGTGCCATTACTATGCTTCTTACCGATCGTAATCTGA
ATACGTCATTTTTTGATCCAACTGGTGGTGGTGATCCCATTTTGTATATACATTTGTTTT

>biv_340_3_Leoparreysia_canefrii
GGACTTTATATCTTTTGTTGGCTTTGTGGTCTGGATTAATTGGGTTGGCTTTGAGGCTTT
TAATTCGAGCTGAGTTAGGACAACCTGGTAGGTTATTGGGTGATGATCAACTATATAATG
TTATTGTTACGGCTCATGCTTTTATAATAATTTTCTTTTTGGTAATGCCAATAATGATTG
GAGGATTTGGTAATTGGTTGATTCCTTTAATGATTGGGGCTCCTGATATAGCTTTCCCTC
GTCTAAATAATTTAAGGTTTTGGCTACTTGTACCTGCTTTATTTTTGCTTTTGAGGTCTT
CTTTGGTAGAGAGTGGTGTTGGAACTGGTTGGACTGTTTATCCTCCTTTGTCTGGAAACG
TAGCACATTCTGGGGCCTCTGTGGATTTAGCTATTTTCTCTTTACATCTTGCTGGTGCTT
CTTCTATTTTAGGAGCTATTAATTTTATTTCTACTGTTGGAAATATACGGTCTCCTGGAT
TAGTAGCTGAGCGAATTCCATTATTTGTTTGAAGTGTTACTGTGACAGCTGTTTTATTAG
TAGCTGCTTTACCAGTTTTAGCTGGTGCCATTACTATGCTTCTTACCGATCGTAATCTGA
ATACGTCATTTTTTGATCCAACTGGTGGTGGTGATCCCATTTTGTATATACATTTGTTTT

>biv_352_Leoparreysia_canefrii
GGACTTTGTATCTTTTGTTGGCTTTGTGGTCTGGATTAATTGGGTTGGCTTTGAGGCTTT
TAATTCGAGCTGAGTTAGGACAACCTGGTAGGTTATTGGGTGATGATCAATTATATAATG
TTATTGTTACGGCTCATGCTTTTATAATAATTTTCTTTTTGGTAATGCCAATAATGATTG
GAGGATTTGGTAATTGGTTGATTCCTTTAATGATTGGGGCTCCTGATATAGCTTTCCCTC
GTCTGAATAATTTAAGGTTTTGGCTACTCGTACCTGCTTTATTTTTGCTTTTGAGGTCTT
CTTTGGTAGAGAGTGGTGTTGGAACTGGTTGGACTGTTTATCCTCCTTTGTCTGGAAACG
TAGCACATTCTGGGGCTTCTGTGGATTTAGCTATTTTCTCTTTACATCTTGCCGGTGCTT
CTTCTATTTTAGGAGCTATTAATTTTATTTCTACTGTTGGAAATATACGGTCTCCTGGAT
TAGTAGCTGAGCGAATTCCATTATTTGTTTGAAGTGTTACTGTGACAGCTGTTTTATTAG
TAGCTGCTTTACCAGTTTTAGCTGGTGCCATTACTATGCTTCTTACCGATCGTAACTTGA
ATACGTCATTTTTTGATCCAACTGGTGGTGGTGATCCAATTTTGTACATACATTTGTTCT

>biv_374_1_Leoparreysia_canefrii
GGACTTTATATCTTTTGTTGGCTTTGTGGTCTGGATTAATTGGGTTGGCTTTGAGGCTTT
TAATTCGAGCTGAGTTAGGACAACCTGGTAGGTTATTGGGTGATGATCAATTATATAATG
TTATTGTTACGGCTCATGCTTTTATAATAATTTTCTTTTTGGTAATGCCAATAATGATTG
GAGGATTTGGTAATTGGTTGATTCCTTTAATGATTGGGGCTCCTGATATAGCTTTCCCTC
GTCTGAATAATTTAAGGTTTTGGCTACTTGTACCTGCTTTATTTTTGCTTTTGAGGTCTT
CTTTGGTAGAGAGTGGTGTTGGAACTGGTTGGACTGTTTATCCTCCTTTGTCTGGAAACG
TGGCACATTCTGGGGCCTCTGTGGATTTAGCTATTTTCTCTTTACATCTTGCCGGTGCTT
CTTCTATTTTAGGAGCTATTAATTTTATTTCTACTGTTGGAAATATACGGTCTCCTGGAT
TAGTAGCTGAGCGAATTCCATTATTTGTTTGAAGTGTTACTGTGACAGCTGTTTTATTAG
TAGCTGCTTTACCAGTTTTAGCTGGTGCCATTACTATGCTTCTTACCGATCGTAACTTGA
ATACGTCGTTTTTTGATCCAACTGGTGGTGGTGATCCCATTTTGTACATACATTTGTTCT

>biv_380_1_Leoparreysia_canefrii
GGACTTTATATCTTTTGTTGGCTTTGTGGTCTGGATTAATTGGGTTGGCTTTGAGGCTTT
TAATTCGAGCTGAGTTAGGACAACCTGGTAGGTTATTGGGTGATGATCAATTATATAATG
TTATTGTTACGGCTCATGCTTTTATAATAATTTTCTTTTTGGTAATGCCAATAATGATTG
GAGGATTTGGTAATTGGTTGATTCCTTTAATGATTGGGGCTCCTGATATAGCTTTTCCTC
GTCTGAATAATTTAAGGTTTTGGTTACTTGTACCTGCTTTATTTTTGCTTTTGAGGTCTT
CTTTGGTAGAGAGTGGTGTTGGAACTGGTTGGACTGTTTATCCTCCTTTGTCTGGAAACG
TAGCACATTCTGGGGCCTCTGTGGATTTAGCTATTTTCTCTTTACATCTTGCCGGTGCTT
CTTCTATTTTAGGAGCTATTAATTTTATTTCTACTGTTGGAAATATACGGTCTCCTGGAT
TAGTAGCTGAGCGAATTCCATTATTTGTTTGAAGTGTTACTGTGACAGCTGTTTTATTAG
TAGCTGCTTTACCAGTTTTAGCTGGTGCCATTACTATGCTTCTTACCGATCGTAACTTGA
ATACGTCATTTTTTGATCCAACTGGTGGTGGTGATCCCATTTTGTACATACATTTGTTCT

>biv_418_1_Leoparreysia_canefrii
GGACTTTATATCTTTTGTTGGCTTTGTGGTCTGGATTAATTGGGTTGGCTTTGAGGCTTT
TAATTCGAGCTGAGTTAGGACAACCTGGTAGGTTATTGGGTGATGATCAATTATATAATG
TTATTGTTACGGCTCATGCTTTTATAATAATTTTCTTTTTGGTAATGCCAATAATGATTG
GAGGATTTGGTAATTGGTTGATTCCTTTAATGATTGGGGCTCCTGATATAGCTTTCCCTC
GTCTAAATAATTTAAGGTTTTGGCTACTTGTACCTGCTTTATTTTTGCTTTTGAGGTCTT
CTTTGGTAGAGAGTGGTGTTGGAACTGGTTGGACTGTTTATCCTCCTTTGTCTGGAAACG
TAGCACATTCTGGGGCCTCTGTGGATTTAGCTATTTTCTCTTTACATCTTGCCGGTGCTT
CTTCTATTTTAGGAGCTATTAATTTTATTTCTACTGTTGGAAATATACGGTCTCCTGGAT
TAGTAGCTGAGCGAATTCCATTATTTGTTTGAAGTGTTACTGTGACAGCTGTTTTATTAG
TAGCTGCTTTACCAGTTTTAGCTGGTGCTATTACTATGCTTCTTACCGATCGTAACTTGA
ATACGTCATTTTTTGATCCAACTGGTGGTGGTGATCCCATTTTGTACATACATTTGTTCT

>biv_418_2_Leoparreysia_canefrii
GGACTTTATATCTTTTGTTGGCTTTGTGGTCTGGATTAATTGGGTTGGCTTTGAGGCTTT
TAATTCGAGCTGAGTTAGGACAACCTGGTAGGTTATTGGGTGATGATCAATTATATAATG
TTATTGTTACGGCTCATGCTTTTATAATAATTTTCTTTTTGGTAATGCCAATAATGATTG
GAGGATTTGGTAATTGGTTGATTCCTTTAATGATTGGGGCTCCTGATATAGCTTTCCCTC
GTCTAAATAATTTAAGGTTTTGGCTACTTGTACCTGCTTTATTTTTGCTTTTGAGGTCTT
CTTTGGTAGAGAGTGGTGTTGGAACTGGTTGGACTGTTTATCCTCCTTTGTCTGGAAACG
TAGCACATTCTGGGGCCTCTGTGGATTTGGCTATTTTCTCTTTACATCTTGCCGGTGCTT
CTTCTATTTTAGGAGCTATTAATTTTATTTCTACTGTTGGAAATATACGGTCTCCCGGAT
TAGTAGCTGAGCGAATTCCATTATTTGTTTGAAGTGTTACTGTGACAGCTGTTTTATTAG
TAGCTGCTTTACCAGTTTTAGCTGGTGCCATTACTATGCTTCTTACCGATCGTAACTTGA
ATACGTCATTTTTTGATCCAACTGGTGGTGGTGATCCCATTTTGTACATACATTTGTTCT

>biv_431_Leoparreysia_canefrii
GGACTTTATATCTTTTGTTGGCTTTGTGGTCTGGATTAATTGGGTTGGCTTTGAGGCTTT
TAATTCGAGCTGAGTTAGGACAACCTGGTAGGTTATTGGGTGATGATCAATTATATAATG
TTATTGTTACGGCTCATGCTTTTATAATAATTTTCTTTTTGGTAATGCCAATAATGATTG
GAGGATTTGGTAATTGGTTGATTCCTTTAATGATTGGGGCTCCTGATATAGCTTTCCCTC
GTCTGAATAATTTAAGGTTTTGGCTACTTGTACCTGCTTTATTTTTGCTTTTGAGGTCTT
CTTTGGTAGAGAGTGGTGTTGGAACTGGTTGGACTGTTTATCCTCCTTTGTCTGGAAACG
TAGCACATTCTGGGGCCTCTGTGGATTTGGCTATTTTCTCTTTACATCTTGCCGGTGCTT
CTTCTATTTTAGGAGCTATTAATTTTATTTCTACTGTTGGAAATATACGGTCTCCCGGAT
TAGTAGCTGAGCGAATTCCATTATTTGTTTGAAGTGTTACTGTGACAGCTGTTTTATTAG
TAGCTGCTTTACCAGTTTTAGCTGGTGCCATTACTATGCTTCTTACCGATCGTAACTTGA
ATACGTCATTTTTTGATCCAACTGGTGGTGGTGATCCCATTTTGTACATACATTTGTTCT

>biv_433_1_Leoparreysia_canefrii
GGACTTTATATCTTTTGTTGGCTTTGTGGTCTGGATTAATTGGGTTGGCTTTGAGGCTTT
TAATTCGAGCTGAGTTAGGACAACCTGGTAGGTTATTGGGTGATGATCAATTATATAATG
TTATTGTTACGGCTCATGCTTTTATAATAATTTTCTTTTTGGTAATGCCAATAATGATTG
GAGGATTTGGTAATTGGTTGATTCCTTTAATGATTGGGGCTCCTGATATAGCTTTCCCTC
GTCTGAATAATTTAAGGTTTTGGCTACTTGTACCTGCTTTATTTTTGCTTTTGAGGTCTT
CTTTGGTAGAGAGTGGTGTTGGAACTGGTTGGACTGTTTATCCTCCTTTGTCTGGAAACG
TAGCACATTCTGGGGCCTCTGTGGATTTGGCTATTTTCTCTTTACATCTTGCCGGTGCTT
CTTCTATTTTAGGGGCTATTAATTTTGTTTCTACTGTTGGAAATATACGGTCTCCCGGAT
TAGTAGCTGAGCGAATTCCATTATTTGTTTGAAGTGTTACTGTGACAGCTGTTTTATTAG
TAGCTGCTTTACCAGTTTTAGCTGGTGCCATTACTATGCTTCTTACCGATCGTAACTTGA
ATACGTCATTTTTTGATCCAACTGGTGGTGGTGATCCCATTTTGTACATACATTTGTTCT

>biv_444_2_Leoparreysia_canefrii
GGACTTTATATCTTTTGTTGGCTTTGTGGTCTGGATTAATTGGGTTGGCTTTGAGGCTTT
TAATTCGAGCTGAGTTAGGACAACCTGGTAGGTTATTGGGTGATGATCAATTATATAATG
TTATTGTTACGGCTCATGCTTTTATAATAATTTTCTTTTTGGTAATGCCAATAATGATTG
GAGGATTTGGTAATTGGTTGATTCCTTTAATGATTGGGGCTCCTGATATAGCTTTCCCTC
GTCTGAATAATTTAAGGTTTTGGCTACTTGTACCTGCTTTATTTTTGCTTTTGAGGTCTT
CTTTGGTAGAGAGTGGTGTTGGAACTGGTTGGACTGTTTATCCTCCTTTGTCTGGAAATG
TAGCACATTCTGGGGCCTCTGTGGATTTAGCTATTTTCTCTTTACATCTTGCCGGTGCTT
CTTCTATTTTAGGAGCTATTAATTTTATTTCTACTGTTGGAAATATACGGTCTCCTGGAT
TAGTAGCTGAGCGAATTCCATTATTTGTTTGAAGTGTTACTGTGACAGCTGTTTTATTAG
TAGCTGCTTTACCAGTTTTAGCTGGTGCCATTACTATGCTTCTTACCGATCGTAACTTGA
ATACGTCATTTTTTGATCCAACTGGTGGTGGTGATCCCATTTTGTATATACATTTGTTCT

>biv_444_3_Leoparreysia_canefrii
GGACTTTATATCTTTTGTTGGCTTTGTGGTCTGGATTAATTGGGTTGGCTTTGAGGCTTT
TAATTCGAGCTGAGTTAGGACAACCTGGTAGGTTATTGGGTGATGATCAATTATATAATG
TTATTGTTACGGCTCATGCTTTTATAATAATTTTCTTTTTGGTAATGCCAATAATGATTG
GAGGATTTGGTAATTGGTTGATTCCTTTAATGATTGGGGCTCCCGATATAGCTTTCCCTC
GTCTGAATAATTTAAGGTTTTGGCTACTTGTACCTGCTTTATTTTTGCTTTTGAGGTCTT
CTTTGGTAGAGAGTGGTGTTGGAACTGGTTGGACTGTTTATCCTCCTTTGTCTGGAAACG
TAGCACATTCTGGGGCCTCTGTGGATTTGGCTATTTTCTCTTTACATCTTGCCGGTGCTT
CTTCTATTTTAGGGGCTATTAATTTTATTTCTACTGTTGGAAATATACGGTCTCCCGGAT
TAGTAGCTGAGCGAATTCCATTATTTGTTTGAAGTGTTACTGTGACAGCTGTTTTATTAG
TAGCTGCTTTACCAGTTTTAGCTGGTGCCATTACTATGCTTCTTACCGATCGTAACTTGA
ATACGTCATTTTTTGATCCAACTGGTGGTGGTGATCCCATTTTGTACATACATTTGTTCT

>biv_922_1_Leoparreysia_canefrii
GGACTTTATATCTTTTGTTGGCTTTGTGGTCTGGATTAATTGGGTTGGCTTTGAGGCTTT
TAATTCGAGCTGAGTTAGGACAACCTGGTAGGTTATTGGGTGATGATCAATTATATAATG
TTATTGTTACGGCTCATGCTTTTATAATAATTTTCTTTTTGGTAATGCCAATAATGATTG
GAGGATTTGGTAATTGGTTGATTCCTTTAATGATTGGGGCTCCTGATATAGCTTTCCCTC
GTCTAAATAATTTAAGGTTTTGGCTACTTGTACCTGCTTTATTTTTGCTTTTGAGGTCTT
CTTTGGTAGAGAGTGGTGTTGGAACTGGTTGGACTGTTTATCCTCCTTTGTCTGGAAACG
TAGCACATTCTGGGGCCTCTGTGGATTTGGCTATTTTCTCTTTACATCTTGCCGGTGCTT
CTTCTATTTTAGGAGCTATTAATTTTATTTCTACTGTTGGAAATATACGGTCTCCCGGAT
TAGTAGCTGAGCGAATTCCATTATTTGTTTGAAGTGTTACTGTGACAGCTGTTTTATTAG
TAGCTGCTTTACCAGTTTTAGCTGGTGCCATTACTATGCTTCTTACCGATCGTAACTTGA
ATACGTCATTTTTTGATCCAACTGGTGGTGGTGATCCAATTTTGTACATACATTTGTTCT

>biv_922_3_Leoparreysia_canefrii
GGACTTTATATCTTTTGTTGGCTTTGTGGTCTGGATTAATTGGGTTGGCTTTGAGGCTTT
TAATTCGAGCTGAGTTAGGACAACCTGGTAGGTTATTGGGTGATGATCAATTATATAATG
TTATTGTTACGGCTCATGCTTTTATAATAATTTTCTTTTTGGTAATGCCAATAATGATTG
GAGGATTTGGTAATTGGTTGATTCCTTTAATGATTGGGGCTCCTGATATAGCTTTCCCTC
GTCTGAATAATTTAAGGTTTTGGCTACTTGTACCTGCTTTATTTTTGCTTTTGAGGTCTT
CTTTGGTAGAGAGTGGTGTTGGAACTGGTTGGACTGTTTATCCTCCTTTGTCTGGAAACG
TAGCACATTCTGGGGCCTCTGTGGATTTAGCTATTTTCTCTTTACATCTTGCCGGTGCTT
CTTCTATTTTAGGAGCTATTAATTTTATTTCTACTGTTGGAAATATACGGTCTCCTGGAT
TAGTAGCTGAGCGAATTCCATTATTTGTTTGAAGTGTTACTGTGACAGCTGTTTTATTAG
TAGCTGCTTTACCAGTTTTAGCTGGTGCCATTACTATGCTTCTTACCGATCGTAACTTGA
ATACGTCATTTTTTGATCCAACTGGTGGTGGTGATCCCATTTTGTACATACATTTGTTCT

>biv_934_1_Leoparreysia_canefrii
GGACTTTATATCTTTTGTTGGCTTTGTGGTCTGGATTAATTGGGTTGGCTTTGAGGCTTT
TAATTCGAGCTGAGTTAGGACAACCTGGTAGGTTATTGGGTGATGATCAATTATATAATG
TTATTGTTACGGCTCATGCTTTTATAATAATTTTCTTTTTGGTAATGCCAATAATGATTG
GAGGATTTGGTAATTGGTTGATTCCTTTAATGATTGGGGCTCCTGATATAGCTTTCCCTC
GTCTGAATAATTTAAGGTTTTGGCTACTTGTACCTGCTTTATTTTTGCTTTTGAGGTCTT
CTTTGGTAGAGAGTGGTGTTGGAACTGGTTGGACTGTTTATCCTCCTTTGTCTGGAAACG
TAGCACATTCTGGGGCCTCTGTGGATTTAGCTATTTTCTCTTTACATCTTGCCGGTGCTT
CTTCTATTCTAGGAGCTATTAATTTTATTTCTACTGTTGGAAATATACGGTCTCCTGGAT
TAGTAGCTGAGCGAATTCCATTATTTGTTTGAAGTGTTACTGTGACAGCTGTTTTGTTAG
TAGCTGCTTTACCAGTTTTAGCTGGTGCCATTACTATGCTTCTTACCGATCGTAACTTGA
ATACGTCATTTTTTGATCCAACTGGTGGTGGTGATCCCATTTTGTATATACATTTGTTCT

>biv_934_2_Leoparreysia_canefrii
GGACTTTGTATCTTTTGTTGGCTTTGTGGTCTGGATTAATTGGGTTGGCTTTGAGGCTTT
TAATTCGAGCTGAGTTAGGACAACCTGGTAGGTTATTGGGTGATGATCAATTATATAATG
TTATTGTTACGGCTCATGCTTTTATAATAATTTTCTTTTTGGTAATGCCAATAATGATTG
GAGGATTTGGTAATTGGTTGATTCCTTTAATGATTGGGGCTCCTGATATAGCTTTCCCTC
GTCTAAATAATTTAAGGTTTTGGCTACTTGTACCTGCTTTATTTTTGCTTTTGAGGTCTT
CTTTGGTAGAGAGTGGTGTTGGAACTGGTTGGACTGTTTATCCTCCTTTGTCTGGAAACG
TAGCACATTCTGGGGCCTCTGTGGATTTGGCTATTTTCTCTTTACATCTTGCCGGTGCTT
CTTCTATTTTAGGAGCTATTAATTTTATTTCTACTGTTGGAAATATACGGTCTCCCGGAT
TAGTAGCTGAGCGAATTCCATTATTTGTTTGAAGTGTTACTGTGACAGCTGTTTTATTAG
TAGCTGCTTTACCAGTTTTAGCTGGTGCCATTACTATGCTTCTTACCGATCGTAACTTGA
ATACGTCATTTTTTGATCCAACTGGTGGTGGTGATCCCATTTTGTACATACATTTGTTCT

>biv_349_Leoparreysia_whitteni
GAACTTTATATTTACTGTTAGCTTTGTGGTCTGGGTTAATTGGGTTGGCTTTGAGCCTTT
TGATTCGAGCTGAATTGGGTCAACCTGGTAGATTATTAGGGGATGATCAATTATACAATG
TTATTGTCACGGCTCATGCTTTTATAATAATTTTCTTTTTGGTGATGCCAATAATGATTG
GGGGGTTTGGAAATTGATTAATTCCTTTGATAATTGGGGCTCCTGACATGGCTTTTCCTC
GTCTAAATAATTTAAGGTTTTGGTTACTTGTACCTGCTTTGTTTTTGCTTTTAAGATCTT
CTTTAGTGGAAAGTGGTGTTGGGACTGGTTGAACTGTTTATCCTCCTTTGTCGGGTAACG
TGGCGCATTCTGGAGCTTCTGTAGATTTGGCTATTTTCTCTTTACACCTTGCTGGTGCTT
CTTCTATTCTAGGGGCTATTAATTTTATCTCTACTGTGGGGAATATACGATCTCCTGGGT
TAGTGGCTGAGCGAATCCCTTTATTTGTTTGAAGAGTTACTGTAACTGCTGTTTTGTTGG
TAGCTGCTTTACCGGTTTTAGCTGGTGCTATTACTATACTTCTTACTGATCGTAATTTGA
ATACATCATTTTTTGACCCTACTGGTGGTGGTGACCCTATTTTGTATATACATTTATTTT

>biv_435_Leoparreysia_whitteni
GAACTTTGTATTTACTGTTGGCTTTGTGGTCTGGGTTAATTGGGTTGGCTTTGAGCCTTT
TGATTCGAGCTGAATTGGGTCAACCTGGTAGATTATTAGGGGATGATCAATTATACAATG
TTATTGTCACGGCTCATGCTTTTATAATAATTTTCTTTTTGGTAATGCCAATAATGATTG
GGGGGTTTGGAAATTGATTAATTCCTTTGATAATTGGGGCTCCTGACATGGCTTTTCCTC
GTCTAAATAATTTAAGGTTTTGGTTACTTGTACCTGCTTTGTTTTTGCTTTTAAGATCTT
CTTTGGTGGAAAGTGGTGTTGGGACTGGTTGAACTGTTTATCCTCCTTTGTCGGGTAACG
TGGCACATTCTGGAGCTTCTGTAGATTTGGCTATTTTCTCTTTACACCTTGCTGGTGCTT
CTTCTATTCTAGGGGCTATTAATTTTATTTCTACTGTGGGGAATATACGATCTCCTGGGT
TAGTGGCTGAGCGAATTCCTTTATTTGTTTGAAGAGTTACTGTAACTGCTGTTTTGTTGG
TAGCTGCTTTACCGGTTTTAGCTGGTGCTATTACTATACTTCTTACTGATCGTAATTTGA
ATACATCATTTTTTGACCCTACTGGTGGTGGTGACCCTATTTTGTATATACATTTATTCT

>biv_449_Leoparreysia_whitteni
GAACTTTGTATTTACTGTTGGCTTTGTGGTCTGGGTTAATTGGGTTGGCTTTGAGCCTTT
TGATTCGAGCCGAATTGGGCCAACCTGGTAGATTATTAGGGGATGATCAATTATACAATG
TTATTGTCACGGCTCATGCTTTTATAATAATTTTCTTTTTGGTGATGCCAATAATGATTG
GGGGGTTTGGAAATTGATTAATTCCTTTGATAATTGGGGCTCCTGACATGGCTTTTCCTC
GTCTAAATAATTTAAGGTTTTGGTTACTTGTACCTGCTTTGTTTTTGCTTTTAAGATCTT
CTTTGGTGGAAAGTGGTGTTGGGACTGGTTGAACTGTTTATCCTCCTTTGTCGGGTAACG
TGGCGCATTCTGGAGCTTCTGTAGATTTGGCTATTTTCTCTTTACACCTTGCTGGTGCTT
CTTCTATTTTAGGGGCTATTAATTTTATTTCTACTGTGGGGAATATACGATCTCCTGGGT
TAGTGGCTGAGCGAATTCCTTTATTTGTTTGAAGAGTTACTGTAACTGCTGTTTTGTTGG
TAGCTGCTTTACCGGTTTTAGCTGGTGCTATTACTATACTTCTTACTGATCGTAATTTGA
ATACATCATTTTTTGACCCTACTGGCGGTGGTGACCCTATTTTGTATATACATTTATTCT

>biv_350_1_Leoparreysia_burmana
GAACTTTATATTTATTGCTGGCTTTGTGATCTGGATTGATTGGGTTAGCTTTAAGGCTTT
TAATTCGAGCTGAGTTAGGCCAGCCTGGTAGGTTATTAGGTGATGATCAATTGTATAATG
TTATTGTTACAGCTCATGCTTTTATAATAATTTTTTTCTTAGTAATGCCAATGATAATTG
GAGGATTTGGAAATTGGTTAATTCCTCTAATAATTGGGGCTCCTGATATGGCTTTTCCTC
GTTTAAATAATTTAAGATTTTGATTACTTGTACCTGCTTTGTTTTTACTTTTAAGGTCTT
CTTTAGTAGAAAGTGGCGTTGGAACTGGTTGAACTGTTTATCCTCCTTTGTCAGGGAATG
TAGCACATTCTGGAGCTTCTGTAGACTTAGCTATTTTTTCTTTGCATCTTGCTGGTGCTT
CTTCTATTTTAGGAGCTATTAATTTTATTTCTACTGTTGGGAATATGCGGTCTCCTGGGT
TGGTGGCTGAGCGAATTCCTTTATTTGTTTGAAGGGTTACTGTGACTGCTGTTTTATTAG
TAGCTGCTTTGCCTGTTTTGGCTGGTGCTATTACTATACTTCTTACTGATCGTAATTTAA
ACACATCATTTTTTGACCCTACTGGTGGTGGTGACCCTATTTTGTATATGCATTTGTTTT

>biv_350_2_Leoparreysia_burmana
GAACTTTATATTTATTGCTGGCTTTGTGATCTGGATTGATTGGGTTAGCTTTAAGGCTTT
TAATTCGAGCTGAGTTAGGCCAGCCTGGTAGGTTATTAGGTGATGATCAATTGTATAATG
TTATTGTTACAGCTCATGCTTTTATAATAATTTTTTTCTTAGTAATGCCAATGATAATTG
GAGGATTTGGAAATTGGTTAATTCCTCTAATAATTGGGGCTCCTGATATGGCTTTTCCTC
GTTTAAATAATTTAAGATTTTGATTACTTGTACCTGCTTTGTTTTTACTTTTAAGGTCTT
CTTTAGTAGAAAGTGGCGTTGGAACTGGTTGAACTGTTTATCCTCCTTTGTCAGGGAATG
TAGCACATTCTGGAGCTTCTGTAGACTTAGCTATTTTTTCTTTGCATCTTGCTGGTGCTT
CTTCTATTTTAGGAGCTATTAATTTTATTTCTACTGTTGGGAATATGCGGTCTCCTGGAT
TGGTGGCTGAGCGAATTCCTTTATTTGTTTGAAGGGTTACTGTGACTGCTGTTCTATTAG
TAGCTGCTTTGCCTGTTTTGGCTGGTGCTATTACTATACTTCTTACTGATCGTAATTTAA
ACACATCATTTTTTGACCCTACTGGTGGTGGTGACCCTATTTTGTATATGCATTTGTTTT

>biv_419_3_Leoparreysia_burmana
GAACTTTATATTTATTGCTGGCTTTGTGATCTGGATTGATTGGGTTAGCTTTAAGGCTTT
TAATTCGAGCTGAGTTAGGTCAGCCTGGTAGGTTATTAGGTGATGATCAATTGTATAATG
TTATTGTTACAGCTCATGCTTTTATAATAATTTTTTTCTTAGTAATGCCAATGATAATTG
GAGGATTTGGAAATTGGTTAATTCCTCTAATAATTGGGGCTCCTGATATGGCTTTTCCTC
GTTTAAATAATTTAAGATTTTGATTACTTGTACCTGCTTTGTTTTTACTTTTAAGGTCTT
CTTTAGTAGAAAGTGGCGTTGGAACTGGTTGAACTGTTTATCCTCCTTTGTCAGGGAATG
TAGCACATTCTGGAGCTTCTGTAGACTTAGCTATTTTTTCTTTGCATCTTGCTGGTGCTT
CTTCTATTTTAGGAGCTATTAATTTTATTTCTACTGTTGGGAATATGCGGTCTCCTGGAT
TGGTGGCTGAGCGAATTCCTTTATTTGTTTGAAGGGTTACTGTGACTGCTGTTTTATTAG
TAGCTGCTTTGCCTGTTTTGGCTGGTGCTATTACTATACTTCTTACTGATCGTAATTTAA
ACACATCATTTTTTGACCCTACTGGTGGTGGTGACCCTATTTTGTATATGCATTTGTTTT

>biv_424_2_Leoparreysia_burmana
GAACTTTATATTTATTGCTGGCTTTGTGATCTGGATTGATTGGGTTAGCTTTAAGGCTTT
TAATTCGAGCTGAGTTAGGCCAGCCTGGTAGGTTATTAGGTGATGATCAATTGTATAATG
TTATTGTTACAGCTCATGCTTTTATAATAATTTTTTTCTTAGTAATGCCAATGATAATTG
GAGGATTTGGAAATTGGTTAATTCCTCTAATAATTGGGGCTCCTGATATGGCTTTTCCTC
GTTTAAATAATTTAAGATTTTGATTACTTGTACCTGCTTTGTTTTTACTTTTAAGGTCTT
CTTTGGTAGAAAGTGGCGTTGGAACTGGTTGAACTGTTTATCCTCCTTTGTCAGGGAACG
TAGCACATTCTGGAGCTTCTGTAGACTTAGCTATTTTTTCTTTGCATCTTGCTGGTGCTT
CTTCTATTTTAGGAGCTATTAATTTTATTTCTACTGTTGGGAATATGCGGTCTCCTGGAT
TGGTGGCTGAGCGAATTCCTTTATTTGTTTGAAGGGTTACTGTGACTGCTGTTCTATTAG
TAGCTGCTTTGCCTGTTTTGGCTGGTGCTATTACTATACTTCTTACTGATCGTAATTTAA
ACACATCATTTTTTGACCCTACTGGTGGTGGTGACCCTATTTTGTATATGCATTTGTTTT

>biv_445_1_Leoparreysia_burmana
GAACTTTATATTTATTGCTGGCTTTGTGATCTGGATTGATTGGGTTAGCTTTAAGGCTTT
TAATTCGAGCTGAGTTAGGCCAGCCTGGTAGGTTATTAGGTGATGATCAATTGTATAATG
TTATTGTTACAGCTCATGCTTTTATAATAATTTTTTTCTTAGTAATGCCAATGATAATTG
GAGGATTTGGAAATTGGTTAATTCCTCTAATAATTGGGGCTCCTGATATGGCTTTTCCTC
GTTTAAATAATTTAAGATTTTGATTACTTGTACCTGCTTTGTTTTTACTTTTAAGGTCTT
CTTTGGTAGAAAGTGGCGTTGGAACTGGTTGAACTGTTTATCCTCCTTTGTCAGGGAACG
TAGCACATTCTGGAGCTTCTGTAGACTTAGCTATTTTTTCTTTGCATCTTGCTGGTGCTT
CTTCTATTTTAGGAGCTATTAATTTTATTTCTACTGTTGGGAATATGCGGTCTCCTGGAT
TGGTGGCTGAGCGAATTCCTTTATTTGTTTGAAGGGTTACTGTGACTGCTGTTTTATTAG
TAGCTGCTTTGCCTGTTTTGGCTGGTGCTATTACTATACTTCTTACTGATCGTAATTTAA
ACACATCATTTTTTGACCCTACTGGTGGTGGTGACCCTATTTTGTATATGCATTTGTTTT

>biv_932_1_Leoparreysia_olivacea
GGACTTTATATTTATTGTTGGCTTTGTGATCTGGGTTAATTGGATTGGCTTTGAGGCTTT
TAATTCGAGCTGAGTTAGGTCAACCTGGTAGGTTATTAGGTGATGATCAGTTATATAATG
TTATTGTTACGGCTCATGCTTTTATAATAATTTTCTTTTTGGTGATGCCAATAATAATTG
GAGGGTTTGGTAATTGATTAATTCCTTTGATGATTGGGGCTCCTGATATGGCTTTTCCTC
GTTTAAATAATTTAAGGTTTTGATTACTTGTACCTGCTTTATTTTTACTTTTAAGGTCTT
CTTTAGTAGAGAGTGGTGTTGGAACTGGCTGGACTGTGTATCCTCCTTTATCTGGAAACG
TGGCACATTCTGGGGCCTCTGTGGATTTGGCTATTTTCTCTTTACATCTTGCCGGTGCTT
CTTCTATTTTAGGGGCTATTAATTTCATTTCTACTGTTGGAAATATACGATCTCCTGGAT
TAGTGGCTGAGCGAATTCCATTGTTTGTTTGAAGAGTTACTGTGACAGCTGTTTTATTAG
TAGCTGCTTTACCAGTTTTAGCTGGTGCTATTACTATGCTTCTTACCGATCGTAATTTGA
ATACGTCATTTTTTGATCCGACTGGTGGTGGTGATCCTATTTTGTATATACATTTGTTTT

>biv_932_3_Leoparreysia_olivacea
GGACTTTATATTTATTGTTGGCTTTGTGATCTGGGTTAATTGGATTGGCTTTGAGGCTTT
TAATTCGAGCTGAGTTAGGTCAACCTGGTAGGTTATTAGGTGATGATCAGTTATATAATG
TTATTGTTACGGCTCATGCTTTTATAATAATTTTCTTTTTGGTAATGCCAATAATAATCG
GAGGGTTTGGTAATTGGTTAATTCCTTTGATGATTGGGGCTCCTGATATGGCTTTTCCTC
GTTTAAATAATTTGAGGTTTTGATTACTTGTACCTGCTTTATTTTTACTTTTAAGGTCTT
CTTTAGTGGAGAGTGGTGTTGGAACTGGCTGGACTGTCTATCCTCCTTTATCTGGAAATG
TGGCACATTCTGGGGCCTCTGTGGATTTAGCTATTTTCTCTTTACATCTTGCCGGTGCTT
CTTCTATTTTAGGGGCTATTAATTTCATTTCTACTGTTGGAAATATACGATCTCCTGGAT
TAGTGGCTGAGCGAATTCCATTGTTTGTTTGAAGAGTTACTGTGACAGCTGTTTTATTAG
TAGCTGCTTTACCAGTTTTAGCTGGTGCTATTACTATGCTTCTTACCGATCGTAATTTGA
ATACGTCATTTTTTGATCCGACTGGTGGTGGTGATCCTATTTTGTATATACATTTGTTTT
