# Supplementary material for: Follow the Footsteps of Leonardo Fea: An Example of an Integrative Revision of Freshwater Mussel Taxa Described from the Former British Burma (Myanmar)
Source: Hindawi journal article supplement (doi:10.1155/2022/6600359), 2022-05-27
Supplement: f1 [file 6600359.f1.zip › Alignment S4.fasta]

>biv_294_1_Gonidea_angulata
GTACACTGTATTTGTTGTTGGCTTTGTGGTCTGGGTTAATTGGGTTAGCTTTGAGATTGT
TAATTCGGGCGGAGTTGGGACAACCTGGAAGATTATTAGGTGATGATCAACTTTATAATG
TAATTGTTACAGCACATGCTTTTATAATAATTTTCTTTTTGGTAATGCCAATAATAATTG
GTGGTTTTGGGAATTGGCTTATTCCTCTTATGATCGGGGCACCTGATATGGCTTTTCCTC
GTCTAAATAATTTAAGGTTTTGATTACTTGTACCGGCTCTTTTTTTATTATTAAGGTCTT
CATTAGTAGAGAGTGGTGTTGGGACTGGTTGGACAGTGTATCCGCCGTTGTCTGGGAATG
TTGCTCATTCTGGGGCTTCGGTTGACTTGGCTATTTTTTCTCTTCATCTTGCGGGTGCTT
CTTCTATTTTGGGTGCTATTAATTTTATTTCTACTGTGGGGAATATGCGTTCTCCTGGGT
TAGTTGCTGAGCGGATTCCTTTGTTTGTGTGGGCTGTGACTGTGACGGCAGTTTTATTGG
TTGCAGCATTACCTGTATTGGCTGGTGCTATTACGATATTACTTACTGATCGTAATCTTA
ATACATCGTTTTTTGATCCTACTGGTGGGGGGGATCCAATTCTGTATATACATTTATTTT

>biv_177_10_Potamida_littoralis
GTACTTTATACTTGTTGTTGGCTTTGTGGTCTGGGTTGATTGGGTTGGCTCTAAGGCTTT
TAATTCGAGCAGAGTTGGGGCAGCCTGGTAGGTTATTGGGGGATGATCAGTTGTATAATG
TTATTGTTACAGCACACGCTTTTATGATAATTTTCTTTTTGGTGATACCGATGATAATTG
GGGGTTTTGGAAATTGACTTATTCCGCTAATAATTGGGGCTCCTGACATGGCCTTTCCTC
GTTTGAATAATTTGAGGTTTTGGCTACTTGTGCCTGCTCTTTTTTTGTTGTTAAGGTCTT
CGTTAGTAGAGAGTGGTGTGGGGACTGGGTGAACAGTTTATCCTCCTTTGTCTGGAAATG
TTGCTCATTCCGGGGCTTCGGTAGACTTGGCTATTTTTTCGTTGCATTTGGCTGGTGCTT
CTTCTATTTTAGGTGCTATTAATTTTATTTCTACTGTTGGAAATATGCGGTCTCCTGGGG
TGGTTGCTGAGCGTATTCCGCTATTCGTATGGGCTGTGACGGTAACAGCGGTCTTGTTAG
TTGCGGCATTGCCTGTGTTGGCTGGGGCTATTACGATGCTCCTTACTGATCGTAATCTTA
ATACTTCATTTTTTGACCCAACTGGAGGGGGGGATCCTATCTTATATATACACTTGTTTT

>biv_177_7_Leguminaia_wheatleyi
GTACGTTGTATTTATTATTGGCTTTGTGGTCTGGGCTAATTGGGTTGGCTTTGAGGTTGT
TGATTCGGGCAGAATTGGGGCAGCCTGGGAGATTATTAGGGGATGATCAATTATATAATG
TTATTGTTACAGCACATGCTTTTATGATAATTTTCTTTCTCGTTATGCCAATGATAATTG
GTGGTTTTGGGAATTGACTTATTCCTCTTATGATCGGGGCACCTGATATGGCTTTTCCTC
GTTTGAATAATTTAAGGTTTTGATTGCTTGTGCCGGCTCTTTTTTTGCTATTAAGGTCTT
CTTTAGTAGAGAGTGGTGTTGGAACGGGTTGGACGGTATATCCCCCGTTGTCAAGAAATG
TGGCTCATTCTGGGGCTTCGGTCGATTTAGCTATTTTTTCACTTCACCTTGCGGGTGCTT
CATCTATTTTGGGTGCTATTAATTTTATTTCTACTGTGGGAAATATACGTTCTCCTGGGT
TAGTTGCTGAGCGGATTCCGTTGTTTGTGTGGGCTGTGACTGTAACAGCGGTTTTGCTGG
TTGCAGCATTACCTGTGTTGGCTGGTGCTATTACGATGTTACTTACTGATCGTAATTTAA
ACACATCGTTTTTTGATCCTACTGGAGGAGGGGATCCAATTTTGTATATGCATTTGTTTT

>biv_200_1_Lamprotula_leai
GGACGTTGTATTTGTTGTTGGCTTTGTGGTCTGGGTTGATTGGGTTGGCTTTGAGGCTTT
TGATTCGGGCAGAGTTAGGGCAACCTGGTAGATTGTTGGGGGATGATCAGTTGTATAATG
TTATTGTTACGGCGCATGCTTTTATAATAATTTTCTTTTTGGTTATACCAATGATAATTG
GTGGTTTTGGGAATTGGCTTATTCCACTAATGATTGGGGCTCCTGATATGGCTTTTCCGC
GGTTAAATAATTTGAGGTTTTGGTTGCTTGTTCCGGCTCTTTTTTTGTTATTGAGGTCTT
CGTTGGTAGAGAGCGGTGTGGGGACTGGGTGGACGGTTTATCCGCCCTTGTCTGGGAATG
TTGCTCATTCTGGGGCTTCAGTAGATTTGGCTATTTTTTCGTTACATTTGGCTGGTGCTT
CTTCTATTTTGGGTGCTATTAATTTTATTTCTACTGTGGGGAATATGCGGTCTCCTGGCG
TAGTGGCTGAGCGTATTCCGTTGTTTGTGTGGGCTGTGACGGTAACAGCAATTTTGTTGG
TTGCAGCATTGCCTGTATTGGCGGGAGCGATTACTATGTTGCTTACTGATCGTAATATTA
ATACTTCGTTTTTTGATCCAACTGGTGGAGGTGATCCCATTTTGTATATACACCTGTTTT

>biv_145_3_Trapezidens_exolescens
GGACTTTGTACTTGTTGTTGGCTTTGTGGTCTGGGTTAATTGGATTAGCTTTGAGGTTGT
TAATTCGGGCTGAACTAGGGCAGCCAGGAAGTTTGTTAGGGGATGACCAGTTGTATAATG
TGATTGTGACTGCTCATGCATTTATAATAATTTTTTTCTTAGTGATGCCAATAATAATTG
GGGGGTTTGGAAATTGGTTAATTCCTTTAATGATTGGGGCTCCAGATATGGCTTTTCCTC
GTTTAAATAATTTGAGGTTTTGATTGTTGGTGCCTGCTTTGTTTTTGTTATTGAGGTCCT
CTTTGGTTGAGAGAGGTGTGGGAACCGGTTGGACAGTCTATCCTCCGTTGTCTGGGAATG
TAGCTCACTCGGGGGCTTCTGTGGATTTGGCTATTTTTTCTTTACATCTTGCTGGTGCCT
CTTCTATTCTGGGTGCTATTAATTTTATTTCTACTGTTGGTAATATGCGATCTCCGGGCT
TGGTTGCTGAGCGAATTCCTTTATTTGTTTGAAGGGTTACTGTAACGGCTATTTTGTTGG
TTGCTGCTTTGCCCGTTTTAGCTGGAGCTATTACCATGCTTCTTACCGATCGTAATCTAA
ATACATCGTTTTTCGACCCTACTGGCGGAGGTGATCCTATTTTGTATATACACTTGTTTT

>biv_145_12_Trapezidens_exolescens
GGACTTTGTACTTGTTGTTGGCTTTGTGGTCTGGGTTAATTGGATTAGCTTTGAGGTTGT
TAATTCGGGCTGAACTAGGGCAGCCAGGAAGTTTGTTAGGGGATGACCAGTTGTATAATG
TGATTGTGACTGCTCATGCATTTATAATAATTTTTTTCTTAGTGATGCCAATAATAATTG
GGGGGTTTGGAAATTGGTTAATTCCTTTAATGATTGGGGCTCCAGATATGGCTTTTCCTC
GTTTAAATAATTTGAGGTTTTGATTGTTGGTGCCTGCTTTGTTTTTGTTACTGAGGTCCT
CTTTGGTTGAGAGAGGTGTGGGAACCGGTTGGACAGTCTATCCTCCGTTGTCTGGGAATG
TAGCTCACTCGGGGGCTTCTGTGGATTTGGCTATTTTTTCTTTACATCTTGCTGGTGCCT
CTTCTATTCTGGGTGCTATTAATTTTATTTCTACTGTTGGTAATATGCGATCTCCGGGCT
TGGTTGCTGAGCGAATTCCTTTATTTGTTTGAAGGGTTACTGTAACGGCTATTTTGTTGG
TTGCTGCTTTGCCCGTTTTAGCTGGAGCTATTACCATGCTTCTTACCGATCGTAATCTAA
ATACATCGTTTTTCGACCCTACTGGCGGAGGTGATCCTATTTTGTATATACACTTGTTTT

>biv_146_11_Trapezidens_exolescens
GGACTTTGTACTTGTTGTTGGCTTTGTGGTCTGGGTTAATTGGATTAGCTTTAAGGTTGT
TAATTCGGGCTGAACTAGGGCAGCCAGGAAGTTTGTTAGGGGATGACCAGTTGTATAATG
TGATTGTGACTGCTCATGCATTTATAATAATTTTTTTCTTAGTGATGCCAATAATAATTG
GGGGGTTTGGAAATTGGTTAATTCCTTTAATGATTGGGGCTCCAGATATGGCTTTTCCTC
GTTTAAATAATTTGAGGTTTTGATTGTTGGTGCCTGCTTTGTTTTTGTTACTGAGGTCCT
CTTTGGTTGAGAGAGGTGTGGGAACCGGTTGGACAGTCTATCCTCCGTTGTCTGGGAATG
TAGCTCACTCGGGGGCTTCTGTGGATTTGGCTATTTTTTCTTTACATCTTGCTGGTGCCT
CTTCTATTCTGGGTGCTATTAATTTTATTTCTACTGTTGGTAATATGCGATCTCCGGGCT
TGGTTGCTGAGCGAATTCCTTTATTTGTTTGAAGGGTTACTGTAACGGCTATTTTGTTGG
TTGCTGCTTTGCCCGTTTTAGCTGGAGCTATTACCATGCTTCTTACCGATCGTAATCTAA
ATACATCGTTTTTCGACCCTACTGGCGGAGGTGATCCTATTTTGTATATACACTTGTTTT

>biv_146_23_Trapezidens_exolescens
GGACTTTGTACTTGTTGTTGGCTTTGTGGTCTGGGTTAATTGGATTAGCTTTAAGGTTGT
TAATTCGGGCTGAACTAGGGCAGCCAGGAAGTTTGTTAGGGGATGACCAGTTGTATAATG
TGATTGTGACTGCTCATGCATTTATAATAATTTTTTTCTTAGTGATGCCAATAATAATTG
GGGGGTTTGGAAATTGGTTAATTCCTTTAATGATTGGGGCTCCAGATATGGCTTTTCCTC
GTTTAAATAATTTGAGGTTTTGATTGTTGGTGCCTGCTTTGTTTTTGTTACTGAGGTCCT
CTTTGGTTGAGAGAGGTGTGGGAACCGGTTGGACAGTCTATCCTCCGTTGTCTGGGAATG
TAGCTCACTCGGGGGCTTCTGTGGATTTGGCTATTTTTTCTTTACATCTTGCTGGTGCCT
CTTCTATTCTGGGTGCTATTAATTTTATTTCTACTGTTGGTAATATGCGATCTCCGGGCT
TGGTTGCTGAGCGAATTCCTTTATTTGTTTGAAGGGTTACTGTAACGGCTATTTTGTTGG
TTGCTGCTTTGCCCGTTTTAGCTGGAGCTATTACCATGCTTCTTACCGATCGTAATTTAA
ATACATCGTTTTTCGACCCTACTGGCGGAGGTGATCCTATTTTGTATATACACTTGTTTT

>biv_630_1_Trapezidens_scutum
GGACTTTGTATTTGTTGTTGGCTTTGTGATCTGGGTTAATTGGATTGGCTTTAAGGTTGT
TAATTCGAGCTGAACTAGGGCAGCCAGGAAGTTTGTTAGGGGATGATCAGTTGTATAATG
TAATTGTGACTGCCCATGCATTTATAATAATTTTCTTTTTAGTGATGCCAATAATAATCG
GGGGGTTTGGAAATTGGTTAATTCCTTTAATGATTGGGGCTCCAGATATGGCTTTTCCTC
GTTTAAATAATTTGAGGTTTTGATTGTTGGTGCCTGCTTTGTTTTTGTTACTGAGGTCCT
CTTTGGTAGAGAGAGGTGTGGGAACTGGTTGGACGGTCTATCCTCCGTTGTCTGGGAATG
TAGCTCATTCGGGGGCTTCTGTGGATTTGGCTATTTTTTCTTTACATCTTGCTGGTGCTT
CTTCTATTCTGGGTGCTATTAACTTTATTTCTACTGTTGGTAATATGCGATCTCCGGGCT
TGGTTGCTGAGCGAATTCCTTTATTTGTTTGAAGGGTTACTGTAACGGCTATTTTGTTGG
TTGCTGCTTTGCCTGTTTTAGCTGGAGCTATTACCATGCTTCTTACCGATCGTAATTTAA
ATACATCGTTTTTCGATCCTACTGGTGGAGGTGATCCAATTTTGTACATACATTTGTTTT

>biv_616_1_Trapezidens_yeti
GGACTTTGTACTTGTTGTTGGCTTTGTGATCTGGGTTAATTGGGTTGGCTTTAAGGTTGT
TAATTCGGGCTGAATTAGGGCAGCCAGGAAGTTTGTTAGGGGATGATCAGTTGTACAATG
TAATTGTGACTGCTCATGCATTTATAATAATTTTCTTTTTAGTGATGCCAATAATAATTG
GGGGGTTTGGAAATTGGTTAATTCCTTTAATGATTGGGGCTCCAGATATGGCTTTTCCTC
GTTTAAATAATTTGAGATTTTGATTGTTGGTGCCTGCTTTGTTTTTATTACTGAGGTCCT
CTTTGGTTGAGAGGGGTGTGGGAACTGGTTGGACAGTCTATCCCCCGTTGTCTGGGAATG
TAGCTCACTCGGGGGCTTCTGTGGATTTGGCTATTTTTTCTTTACACCTTGCAGGTGCTT
CCTCTATTCTGGGTGCTATTAATTTTATTTCTACTGTTGGTAATATGCGATCTCCGGGCT
TGGTTGCTGAGCGAATTCCTTTATTTGTTTGAAGGGTTACTGTAACGGCTATTTTGTTGG
TTGCTGCTTTGCCTGTTTTAGCTGGAGCTATTACCATGCTTCTTACTGACCGTAATTTAA
ATACATCGTTTTTTGACCCTACTGGTGGAGGTGATCCTATTTTGTATATACACTTGTTTT

>biv_250_4_Trapezidens angustior
GGACTTTATACTTGTTGTTGGCTTTGTGATCTGGGTTAATTGGGTTGGCTTTAAGGTTGT
TAATCCGGGCTGAATTAGGGCAGCCAGGAAGTTTGTTAGGGGATGATCAGTTGTACAATG
TAATTGTAACTGCTCATGCATTTATAATAATTTTCTTTTTAGTGATGCCAATAATAATTG
GGGGGTTTGGAAATTGGTTAATTCCTTTAATGATTGGGGCTCCAGATATGGCTTTTCCTC
GTTTAAATAATTTGAGGTTTTGATTGTTGGTGCCTGCTTTGTTTTTATTACTTAGGTCCT
CTTTGGTTGAGAGTGGTGTGGGAACTGGTTGGACAGTCTATCCTCCGTTGTCTGGGAATG
TAGCTCACTCGGGGGCTTCTGTGGATTTGGCTATTTTTTCTTTACACCTTGCGGGTGCTT
CCTCTATTTTGGGTGCTATTAATTTTATTTCTACTGTTGGTAATATGCGATCTCCGGGCT
TGGTTGCTGAGCGAATTCCTTTATTTGTTTGAAGGGTTACTGTAACGGCTATTTTGTTGG
TTGCTGCTTTGCCTGTTTTAGCTGGAGCTATTACTATGCTTCTTACTGACCGTAATCTAA
ATACATCGTTTTTCGACCCTACTGGTGGAGGTGATCCTATTTTGTATATACACTTGTTTT

>biv_370_1_Trapezidens_angustior
GGACTTTATACTTGTTGTTGGCTTTGTGATCTGGGTTAATTGGGTTGGCTTTAAGGTTGT
TAATCCGGGCTGAATTAGGGCAGCCAGGAAGTTTGTTAGGGGATGATCAGTTGTACAATG
TAATTGTAACTGCTCATGCATTTATAATAATTTTCTTTTTAGTGATGCCAATAATAATTG
GGGGGTTTGGAAATTGGTTAATTCCTTTAATGATTGGGGCTCCAGATATGGCTTTTCCTC
GTTTAAATAATTTGAGGTTTTGATTGTTGGTGCCTGCTTTGTTTTTATTACTTAGGTCCT
CTTTGGTTGAGAGTGGTGTGGGAACTGGTTGGACAGTCTATCCTCCGTTGTCTGGGAATG
TAGCTCACTCGGGGGCTTCTGTGGATTTGGCTATTTTTTCTTTACACCTTGCGGGTGCTT
CCTCTATTTTGGGTGCTATTAATTTTATTTCTACTGTTGGTAATATGCGATCTCCGGGCT
TGGTTGCTGAGCGAATTCCTTTATTTGTTTGAAGGGTTACTGTAACGGCTATTTTGTTGG
TTGCTGCTTTGCCTGTTTTAGCTGGAGCTATTACCATGCTTCTTACTGACCGTAATCTAA
ATACATCGTTTTTCGACCCTACTGGCGGAGGTGATCCTATTTTGTATATACACTTGTTTT

>biv_382_1_Trapezidens_angustior
GGACTTTATACTTGTTGTTGGCTTTGTGATCTGGGTTAATTGGGTTGGCTTTAAGGTTGT
TAATCCGGGCTGAATTAGGGCAGCCAGGAAGTTTGTTGGGGGATGATCAGTTGTACAATG
TAATTGTAACTGCTCATGCATTTATAATAATTTTCTTTTTAGTGATGCCAATAATAATTG
GGGGGTTTGGAAATTGGTTAATTCCTTTAATGATTGGGGCTCCAGATATGGCTTTTCCTC
GTTTAAATAATTTGAGGTTTTGATTGTTGGTGCCTGCTTTGTTTTTATTACTTAGGTCCT
CTTTGGTTGAGAGTGGTGTGGGAACTGGTTGGACAGTCTATCCTCCGTTGTCTGGGAATG
TAGCTCATTCGGGGGCTTCTGTGGATTTGGCTATTTTTTCTTTACACCTTGCGGGTGCTT
CCTCTATTTTGGGTGCTATTAATTTTATTTCTACTGTTGGTAATATGCGATCTCCGGGCT
TGGTTGCTGAGCGAATTCCTTTATTTGTTTGAAGGGTTACTGTAACGGCTATTTTGTTGG
TTGCTGCTTTGCCTGTTTTAGCTGGAGCTATTACCATGCTTCTTACTGACCGTAATCTAA
ATACATCGTTTTTCGACCCTACTGGTGGAGGTGATCCTATTTTGTATATACACTTGTTTT

>biv_382_2_Trapezidens_angustior
GGACTTTATACTTGTTGTTGGCTTTGTGATCTGGGTTAATTGGGTTGGCTTTAAGGTTGT
TAATCCGGGCTGAATTAGGGCAGCCAGGAAGTTTGTTAGGGGATGATCAGTTGTACAATG
TAATTGTAACTGCTCATGCATTTATAATAATTTTCTTTTTAGTGATGCCAATAATAATTG
GGGGGTTTGGAAATTGGTTAATTCCTTTAATGATTGGGGCTCCAGATATGGCTTTTCCTC
GTTTAAATAATTTGAGGTTTTGATTGTTGGTGCCTGCTTTGTTTTTATTACTTAGGTCCT
CTTTGGTTGAGAGTGGTGTGGGAACTGGTTGGACAGTCTATCCTCCGTTGTCTGGGAATG
TAGCTCATTCGGGGGCTTCTGTGGATTTGGCTATTTTTTCTTTACACCTTGCGGGTGCTT
CCTCTATTTTGGGTGCTATTAATTTTATTTCTACTGTTGGTAATATGCGATCTCCGGGCT
TGGTTGCTGAGCGAATTCCTTTATTTGTTTGAAGGGTTACTGTAACGGCTATTTTGTTGG
TTGCTGCTTTGCCTGTTTTAGCTGGAGCTATTACCATGCTTCTTACTGACCGTAATCTAA
ATACATCGTTTTTCGACCCTACTGGTGGAGGTGATCCTATTTTGTATATACACTTGTTTT

>biv_388_1_Trapezidens_angustior
GGACTTTATACTTGTTGTTGGCTTTGTGATCTGGGTTAATTGGGTTGGCTTTAAGGTTGT
TAATCCGGGCTGAATTGGGGCAGCCAGGAAGTTTGTTAGGGGATGATCAGTTGTACAATG
TAATTGTAACTGCTCATGCATTTATAATAATTTTCTTTTTAGTGATGCCAATAATAATTG
GGGGGTTTGGAAATTGGTTAATTCCTTTAATGATTGGGGCTCCAGATATGGCTTTTCCTC
GTTTAAATAATTTGAGGTTTTGATTGTTGGTGCCTGCTTTGTTTTTATTACTTAGGTCCT
CTTTGGTTGAGAGTGGTGTGGGAACTGGTTGGACAGTCTATCCTCCGTTGTCTGGGAATG
TAGCTCATTCGGGGGCTTCTGTGGATTTGGCTATTTTTTCTTTACACCTTGCGGGTGCTT
CCTCTATTTTGGGTGCTATTAATTTTATTTCTACTGTTGGTAATATGCGATCTCCGGGCT
TGGTTGCTGAGCGAATTCCTTTATTTGTTTGAAGGGTTACTGTAACGGCTATTTTGTTGG
TTGCTGCTTTGCCTGTTTTAGCTGGAGCTATTACCATGCTTCTTACTGACCGTAATCTAA
ATACATCGTTTTTCGACCCTACTGGTGGAGGTGATCCTATTTTGTATATACACTTGTTTT

>biv_394_1_Trapezidens_angustior
GGACTTTATACTTGTTGTTGGCTTTGTGATCTGGGTTAATTGGGTTGGCTTTAAGGTTGT
TAATCCGGGCTGAATTAGGGCAGCCAGGAAGTTTGTTAGGGGATGATCAGTTGTACAATG
TAATTGTAACTGCTCATGCATTTATAATAATTTTCTTTTTAGTGATGCCAATAATAATTG
GGGGGTTTGGAAATTGGTTAATTCCTTTAATGATTGGGGCTCCAGATATGGCTTTTCCTC
GTTTAAATAATTTGAGGTTTTGATTGTTGGTGCCTGCTTTGTTTTTATTACTTAGGTCCT
CTTTGGTTGAGAGTGGTGTGGGAACTGGTTGGACAGTCTATCCTCCGTTGTCTGGGAATG
TAGCTCACTCGGGGGCTTCTGTGGATTTGGCTATTTTTTCTTTACACCTTGCGGGTGCTT
CCTCTATTTTGGGTGCTATTAATTTTATTTCTACTGTTGGTAATATGCGATCTCCGGGCT
TGGTTGCTGAGCGAATTCCCTTATTTGTTTGAAGGGTTACTGTAACGGCTATTTTGTTGG
TTGCTGCTTTGCCTGTTTTAGCTGGAGCTATTACCATGCTTCTTACTGACCGTAATCTAA
ATACATCGTTTTTCGACCCTACTGGTGGAGGTGATCCTATTTTGTATATACACTTGTTTT

>biv_336_1_Trapezidens_dolichorhynchus
GGACTTTGTATTTGTTGTTGGCTTTGTGATCTGGGTTAATTGGGTTGGCTTTAAGGTTGT
TAATTCGGGCTGAATTAGGGCAGCCAGGAAGTTTGTTAGGGGATGATCAGTTGTACAACG
TAATTGTGACTGCTCATGCATTTATAATAATTTTCTTTTTAGTGATGCCAATAATAATTG
GGGGGTTTGGAAATTGGTTAATTCCTTTAATGATTGGGGCTCCAGATATGGCTTTTCCTC
GTTTAAATAATTTGAGGTTTTGATTGTTGGTGCCTGCTTTGTTTTTATTACTGAGGTCCT
CTTTGGTTGAGAGAGGTGTGGGAACTGGTTGGACAGTCTACCCTCCGTTGTCTGGGAATG
TAGCTCACTCGGGAGCTTCTGTGGATTTGGCTATTTTTTCTTTACACCTTGCGGGTGCTT
CCTCTATTCTGGGTGCTATTAATTTTATTTCTACTGTTGGTAATATGCGATCTCCGGGTT
TGGTTGCTGAGCGAATTCCTTTATTTGTTTGAAGGGTTACTGTAACAGCTATTTTGTTGG
TTGCTGCTTTGCCTGTTTTAGCTGGAGCGATTACCATGCTTCTTACTGACCGTAATCTAA
ATACATCGTTTTTCGATCCTACTGGTGGAGGTGATCCTATTTTGTATATACACTTGTTTT

>biv_353_Trapezidens_dolichorhynchus
GGACTTTGTATTTGTTGTTGGCTTTGTGATCTGGGTTAATTGGGTTGGCTTTAAGGTTGT
TAATTCGGGCTGAATTAGGGCAGCCAGGAAGTTTGTTAGGGGATGATCAGTTGTACAATG
TAATTGTGACTGCTCATGCATTTATAATAATTTTCTTTTTAGTGATGCCAATAATAATTG
GGGGGTTTGGAAATTGGTTAATTCCTTTAATGATTGGGGCTCCAGATATGGCTTTTCCTC
GTTTAAATAATTTGAGGTTTTGATTGTTGGTGCCTGCTTTGTTTTTATTACTAAGGTCCT
CTTTGGTTGAGAGAGGTGTGGGAACTGGTTGGACAGTCTACCCTCCGTTGTCTGGGAATG
TAGCTCACTCGGGAGCTTCTGTGGATTTAGCTATTTTTTCTTTACACCTTGCGGGTGCTT
CCTCTATTCTGGGTGCTATTAATTTTATTTCTACTGTTGGTAATATGCGATCTCCGGGTT
TGGTTGCTGAGCGAATTCCTTTATTTGTTTGAAGGGTTACTGTAACGGCTATTTTGTTGG
TTGCTGCTTTGCCTGTTTTAGCTGGAGCGATTACCATGCTTCTTACTGACCGTAATCTAA
ATACATCGTTTTTCGATCCTACTGGTGGAGGTGATCCTATTTTGTATATACACTTGTTTT

>biv_354_3_Trapezidens_dolichorhynchus
GGACTTTGTACTTGTTGTTGGCTTTGTGATCTGGGTTAATTGGGTTGGCTTTAAGGTTGT
TAATTCGGGCTGAATTAGGGCAGCCAGGAAGTTTGTTAGGGGATGATCAGTTGTACAATG
TAATTGTGACTGCTCATGCATTTATAATAATTTTCTTTTTAGTGATGCCAATAATAATTG
GGGGGTTTGGAAATTGGTTAATTCCTTTAATGATTGGGGCTCCAGATATGGCCTTTCCTC
GTTTAAATAATTTGAGGTTTTGATTGTTGGTGCCTGCTTTGTTTTTATTACTAAGGTCCT
CTTTGGTTGAGAGAGGTGTGGGAACCGGTTGGACAGTCTATCCTCCGTTGTCTGGGAATG
TAGCTCACTCGGGGGCTTCTGTGGATTTGGCTATTTTTTCTTTACACCTTGCGGGTGCTT
CCTCTATTCTAGGTGCTATTAATTTTATTTCTACTGTTGGTAATATGCGATCTCCGGGTT
TGGTTGCTGAGCGAATTCCTTTATTTGTTTGAAGGGTTACTGTAACGGCTATTTTGTTGG
TTGCTGCTTTGCCTGTTTTAGCTGGAGCGATTACCATGCTTCTTACTGACCGTAATTTAA
ATACATCGTTTTTCGACCCTACTGGTGGAGGTGATCCTATTTTGTATATACACTTGTTTT

>biv_417_2_Trapezidens_dolichorhynchus
GGACTTTGTACTTGTTGTTGGCTTTGTGATCTGGGTTAATTGGGTTGGCTTTAAGGTTGT
TAATTCGGGCTGAATTAGGGCAGCCAGGAAGTTTGTTAGGGGATGATCAGTTGTACAATG
TAATTGTGACTGCTCATGCATTTATAATAATTTTCTTTTTAGTGATGCCAATAATAATTG
GGGGGTTTGGAAATTGGTTAATTCCTTTAATGATTGGGGCTCCAGATATGGCTTTTCCTC
GTTTAAATAATTTGAGGTTTTGATTGTTGGTGCCTGCTTTGTTTTTATTACTAAGGTCCT
CTTTGGTTGAGAGAGGTGTGGGAACCGGTTGGACAGTCTATCCTCCGTTGTCTGGGAATG
TAGCTCACTCGGGGGCTTCTGTGGATTTGGCTATTTTTTCTTTACACCTTGCGGGTGCTT
CCTCTATTCTAGGTGCTATTAATTTTATTTCTACTGTTGGTAATATGCGATCTCCGGGTT
TGGTTGCTGAGCGAATTCCTTTATTTGTTTGAAGGGTTACTGTAACGGCTATTTTGTTGG
TTGCTGCTTTGCCTGTTTTAGCTGGAGCGATTACCATGCTTCTTACTGACCGTAATCTAA
ATACATCGTTTTTCGACCCTACTGGTGGAGGTGATCCTATTTTGTATATACACTTGTTTT

>biv_442_1_Trapezidens_dolichorhynchus
GGACTTTGTATTTGTTGTTGGCTTTGTGATCTGGGTTAATTGGGTTGGCTTTAAGGTTGT
TAATTCGGGCTGAATTAGGGCAGCCAGGAAGTTTGTTAGGGGATGATCAGTTGTACAATG
TAATTGTGACTGCTCATGCATTTATAATAATTTTCTTTTTAGTGATGCCAATAATAATTG
GGGGGTTTGGAAATTGGTTAATTCCTTTAATGATTGGGGCTCCAGATATGGCTTTTCCTC
GTTTAAATAATTTGAGGTTTTGATTGTTGGTGCCTGCTTTGTTTTTATTACTAAGGTCCT
CTTTGGTTGAGAGAGGTGTGGGAACTGGTTGGACAGTCTACCCTCCGTTGTCTGGGAATG
TAGCTCACTCGGGAGCTTCTGTGGATTTAGCTATTTTTTCTTTACATCTTGCGGGTGCTT
CCTCTATTCTGGGTGCTATTAATTTTATTTCTACTGTTGGTAATATGCGATCTCCGGGTT
TGGTTGCTGAGCGAATTCCTTTATTTGTTTGAAGGGTTACTGTAACGGCTATTTTGTTGG
TTGCTGCTTTGCCTGTTTTAGCTGGAGCGATTACCATGCTTCTTACTGACCGTAATCTAA
ATACATCGTTTTTCGATCCTACTGGTGGAGGTGATCCTATTTTGTATATACACTTGTTTT

>biv_109_1_Lamellidens_savadiensis
GAACTTTGTACTTGTTGTTAGCATTGTGGTCTGGGTTAATTGGATTAGCTTTGAGGCTTT
TGATTCGAGCCGAGTTGGGACAACCAGGTAGTTTGTTGGGGGATGATCAGTTGTATAATG
TTATTGTAACAGCTCATGCGTTTATAATAATTTTTTTCTTGGTGATGCCAATGATGATTG
GTGGATTTGGGAATTGGTTGATTCCTTTAATGATTGGGGCTCCTGATATGGCTTTTCCTC
GGTTAAATAATTTAAGGTTTTGATTGCTTGTACCTGCCTTATTTCTATTGCTAAGGTCTT
CTTTGGTGGAGAGGGGTGTTGGGACTGGATGGACAGTTTATCCTCCTTTGTCAGGAAATG
TGGCTCATTCTGGGGCTTCTGTGGATTTAGCTATTTTTTCTTTGCATCTTGCTGGTGCTT
CTTCTATTTTGGGGGCTATTAATTTTATTTCTACTGTGGGAAATATGCGATCTCCAGGGA
TAGTTGCTGAGCGGATTCCGCTATTTGTTTGGAGTGTTACCGTAACGGCTGTTTTATTAG
TGGCTGCTTTGCCTGTATTAGCTGGTGCTATTACAATGCTACTAACTGATCGTAATTTAA
ATACATCTTTTTTTGACCCTACAGGGGGAGGTGATCCGATTTTATATATACATTTGTTTT

>biv_109_2_Lamellidens_savadiensis
GAACTTTGTACTTGTTGTTAGCATTGTGGTCTGGGTTAATTGGATTAGCTTTGAGGCTTT
TGATTCGAGCCGAGTTGGGACAACCAGGTAGTTTGTTGGGGGATGATCAGTTGTATAATG
TTATTGTAACAGCTCATGCGTTTATAATAATTTTTTTCTTGGTGATGCCAATGATGATTG
GTGGATTTGGGAATTGGTTGATTCCTTTAATGATTGGGGCTCCTGATATGGCTTTTCCTC
GGTTAAATAATTTAAGGTTTTGATTGCTTCTACCTGCCTTATTTCTATTGCTAAGGTCTT
CTTTGGTGGAGAGGGGTGTTGGGACTGGATGGACAGTTTATCCTCCTTTGTCAGGAAATG
TGGCTCATTCTGGGGCTTCTGTGGATTTAGCTATTTTTTCTTTGCATCTTGCTGGTGCTT
CTTCTATTTTGGGGGCTATTAATTTTATTTCTACTGTGGGAAATATGCGATCTCCAGGGA
TAGTTGCTGAGCGGATTCCGCTATTTGTTTGGAGTGTTACCGTAACGGCTGTTTTATTAG
TGGCTGCTTTGCCTGTATTAGCTGGTGCTATTACAATGCTACTAACTGATCGTAATTTAA
ATACATCTTTTTTTGACCCTACAGGGGGAGGTGATCCGATTTTATATATACATTTGTTTT

>biv_109_3_Lamellidens_savadiensis
GAACTTTGTACTTGTTGTTAGCATTGTGGTCTGGGTTAATTGGATTAGCTTTGAGGCTTT
TGATTCGAGCCGAGTTGGGACAACCAGGTAGTTTGTTGGGGGATGATCAGTTGTATAATG
TTATTGTAACAGCTCATGCGTTTATAATAATTTTTTTCTTGGTGATGCCAATGATGATTG
GTGGATTTGGGAATTGGTTGATTCCTTTAATGATTGGGGCTCCTGATATGGCTTTTCCTC
GGTTAAATAATTTAAGGTTTTGATTGCTTGTACCTGCCTTATTTCTATTGCTAAGGTCTT
CTTTGGTGGAGAGGGGTGTTGGGACTGGATGGACAGTTTATCCTCCTTTGTCGGGAAATG
TGGCTCATTCTGGGGCTTCTGTGGATTTAGCTATTTTTTCTTTGCATCTTGCTGGTGCTT
CTTCTATTTTGGGGGCTATTAATTTTATTTCTACTGTGGGAAATATGCGATCTCCAGGGA
TAGTTGCTGAGCGGATTCCGCTATTTGTTTGGAGTGTTACCGTAACAGCTGTTTTATTAG
TGGCTGCTTTGCCTGTATTAGCTGGTGCTATTACAATGCTACTAACTGATCGTAATTTAA
ATACATCTTTTTTTGACCCTACAGGGGGAGGTGATCCGATTTTATATATACATTTGTTTT

>biv_242_8_Lamellidens_savadiensis
GGACTTTGTACTTGTTGTTAGCATTGTGGTCTGGGTTAATTGGATTAGCTTTGAGGCTTT
TGATTCGAGCCGAGTTGGGACAACCAGGTAGTTTGTTGGGGGATGATCAGTTGTATAATG
TTATTGTAACAGCTCATGCGTTTATAATAATTTTTTTCTTGGTGATGCCAATGATGATTG
GTGGATTTGGGAATTGGTTGATTCCTTTAATGATTGGGGCTCCTGATATGGCTTTTCCTC
GGTTAAATAATTTAAGGTTTTGATTGCTTGTACCTGCCTTATTTCTATTGTTAAGGTCTT
CTTTGGTGGAGAGGGGTGTTGGGACTGGATGGACAGTTTATCCTCCTTTGTCAGGAAATG
TGGCTCATTCTGGGGCTTCTGTGGATTTAGCTATTTTTTCTTTGCATCTTGCTGGTGCTT
CTTCTATTTTGGGGGCTATTAATTTTATTTCTACTGTGGGAAATATGCGATCTCCGGGGA
TAGTCGCTGAGCGGATTCCGCTATTTGTTTGGAGTGTTACTGTAACGGCTGTTTTATTAG
TAGCTGCTTTGCCTGTATTAGCTGGTGCTATTACAATGCTACTAACTGATCGTAATTTAA
ATACATCTTTTTTTGACCCTACAGGGGGAGGTGATCCAATTTTATACATACATTTGTTTT

>biv_257_1_Lamellidens_savadiensis
GAACTTTGTACTTGTTGTTAGCATTGTGGTCTGGGTTAATTGGATTAGCTTTGAGGCTTT
TGATTCGAGCCGAGTTGGGACAACCAGGTAGTTTGTTGGGGGATGATCAGTTGTATAATG
TTATTGTAACAGCTCATGCGTTTATAATAATTTTTTTCTTGGTGATGCCAATGATGATTG
GTGGATTTGGGAATTGGTTGATTCCTTTAATGATTGGGGCTCCTGATATGGCTTTTCCTC
GATTAAATAATTTAAGGTTTTGATTGCTTGTACCTGCCTTATTTCTATTGCTAAGGTCTT
CTTTGGTGGAGAGGGGTGTTGGGACTGGATGGACAGTTTATCCTCCTTTGTCAGGAAATG
TGGCTCATTCTGGGGCTTCTGTGGACTTAGCTATTTTTTCTTTGCATCTTGCTGGTGCTT
CTTCTATTTTGGGGGCTATTAATTTTATTTCTACTGTGGGAAATATGCGATCTCCAGGGA
TAGTCGCTGAGCGGATTCCGCTATTTGTTTGGAGTGTTACCGTAACGGCTGTTTTATTAG
TGGCTGCTTTGCCTGTATTAGCTGGTGCTATTACAATGCTACTAACTGATCGTAATTTAA
ATACATCTTTTTTTGATCCTACAGGGGGAGGTGATCCAATTTTATACATACATTTGTTTT

>biv_257_6_Lamellidens_savadiensis
GAACTTTGTACTTGTTGTTAGCATTGTGGTCTGGGTTAATTGGATTAGCTTTGAGGCTTT
TGATTCGAGCCGAGTTGGGACAACCAGGTAGTTTGTTGGGGGATGATCAGTTGTATAATG
TTATTGTAACAGCTCATGCGTTTATAATAATTTTTTTCTTGGTGATGCCAATGATGATTG
GTGGATTTGGGAATTGGTTGATTCCTTTAATGATTGGGGCTCCTGATATGGCTTTTCCTC
GGTTAAATAATTTAAGGTTTTGATTGCTTGTACCTGCCTTATTTCTATTGCTAAGGTCTT
CTTTGGTGGAGAGGGGTGTTGGGACTGGATGGACAGTTTATCCTCCTTTGTCAGGAAATG
TGGCTCATTCTGGGGCTTCTGTGGATTTAGCTATTTTTTCTTTGCATCTTGCTGGTGCTT
CTTCTATTTTGGGGGCTATTAATTTTATTTCTACTGTGGGAAATATGCGATCTCCAGGGA
TAGTCGCTGAGCGGATTCCGCTATTTGTTTGGAGTGTTACCGTAACGGCTGTTTTATTAG
TGGCTGCTTTGCCTGTATTAGCTGGTGCTATTACAATGCTACTAACTGATCGTAATTTAA
ATACATCTTTTTTTGATCCTACAGGGGGAGGTGATCCAATTTTATACATACATTTGTTTT

>biv_257_9_Lamellidens_savadiensis
GAACTTTGTACTTGTTGTTAGCATTGTGGTCTGGGTTAATTGGATTAGCTTTGAGGCTTT
TGATTCGAGCCGAGTTGGGACAACCAGGTAGTTTGTTGGGGGATGATCAGTTGTATAATG
TTATTGTAACAGCTCATGCGTTTATAATAATTTTTTTCTTGGTGATGCCAATGATGATTG
GTGGATTTGGGAATTGGTTGATTCCTTTAATGATTGGGGCTCCTGATATGGCTTTTCCTC
GGTTAAATAATTTAAGGTTTTGATTGCTTGTACCTGCCTTATTTCTATTGCTAAGGTCTT
CTTTGGTGGAGAGGGGTGTTGGGACTGGATGGACAGTTTATCCTCCTTTGTCAGGAAATG
TGGCTCATTCTGGGGCTTCTGTGGATTTAGCTATTTTTTCTTTGCATCTTGCTGGTGCTT
CTTCTATTTTGGGGGCCATTAATTTTATTTCTACTGTGGGAAATATGCGATCTCCAGGGA
TAGTCGCTGAGCGGATTCCGCTATTTGTTTGGAGTGTTACTGTAACGGCTGTTTTATTAG
TGGCTGCTTTGCCTGTATTAGCTGGTGCTATTACAATGCTACTAACTGATCGTAATTTAA
ATACATCTTTTTTTGATCCTACAGGGGGAGGTGATCCAATTTTATACATACATTTGTTTT

>biv_262_1_Lamellidens_savadiensis
GAACTTTGTACTTGTTGTTAGCATTGTGGTCTGGGTTAATTGGATTAGCTTTGAGGCTTT
TGATTCGAGCCGAGTTGGGACAACCAGGTAGTTTGTTGGGGGATGATCAGTTGTATAATG
TTATTGTAACAGCTCATGCGTTTATAATAATTTTTTTCTTGGTGATGCCAATGATGATTG
GTGGATTTGGGAATTGGTTGATTCCTTTAATGATTGGGGCTCCTGATATGGCTTTTCCTC
GATTAAATAATTTAAGGTTTTGATTGCTTGTACCTGCCTTATTTCTATTGCTAAGGTCTT
CTTTGGTGGAGAGGGGTGTTGGGACTGGATGGACAGTTTATCCTCCTTTGTCAGGAAATG
TGGGTCATTCTGGGGCTTCTGTGGACTTAGCTATTTTTTCTTTGCATCTTGCTGGTGCTT
CTTCTATTTTGGGGGCTATTAATTTTATTTCTACTGTGGGAAATATGCGATCTCCAGGGA
TAGTCGCTGAGCGGATTCCGCTATTTGTTTGGAGTGTTACCGTAACGGCTGTTTTATTAG
TGGCTGCTTTGCCTGTATTAGCTGGTGCTATTACAATGCTACTAACTGATCGTAATTTAA
ATACATCTTTTTTTGATCCTACAGGGGGAGGTGATCCAATTTTATACATACATTTGTTTT

>biv_262_2_Lamellidens_savadiensis
GAACTTTGTACTTGTTGTTAGCATTGTGGTCTGGGTTAATTGGATTAGCTTTGAGGCTTT
TGATTCGAGCCGAGTTGGGACAACCAGGTAGTTTGTTGGGGGATGATCAGTTGTATAATG
TTATTGTAACAGCTCATGCGTTTATAATAATTTTTTTCTTGGTGATGCCAATGATGATTG
GTGGATTTGGGAATTGGTTGATTCCTTTAATGATTGGGGCTCCTGATATGGCTTTTCCTC
GGTTAAATAATTTAAGGTTTTGATTGCTTGTACCTGCCTTATTTCTATTGCTAAGGTCTT
CTTTGGTGGAGAGGGGTGTTGGGACTGGATGGACAGTTTATCCTCCTTTGTCAGGAAATG
TGGCTCATTCTGGGGCTTCTGTGGATTTAGCTATTTTTTCTTTGCATCTTGCTGGTGCTT
CTTCTATTTTGGGGGCTATTAATTTTATTTCTACTGTGGGAAATATGCGATCTCCAGGGA
TAGTCGCTGAGCGGATTCCGCTATTTGTTTGGAGTGTTACCGTAACGGCTGTTTTATTAG
TGGCTGCTTTGCCTGTATTAGCTGGTGCTATTACAATGCTACTAACTGATCGTAATTTAA
ATACATCTTTTTTTGACCCTACAGGGGGAGGTGATCCAATTTTATACATACATTTGTTTT

>biv_262_4_Lamellidens_savadiensis
GAACTTTGTACTTGTTGTTAGCATTGTGGTCTGGGTTAATTGGATTAGCTTTGAGGCTTT
TGATTCGAGCCGAGTTGGGACAACCAGGTAGTTTGTTGGGGGATGATCAGTTGTATAATG
TTATTGTAACAGCCCATGCGTTTATAATAATTTTTTTCTTGGTGATGCCAATGATGATTG
GTGGATTTGGGAATTGGTTGATTCCTTTAATGATTGGGGCTCCTGATATGGCTTTTCCTC
GGTTAAATAATTTAAGGTTTTGATTGCTTGTACCTGCCTTATTTCTATTGTTAAGGTCTT
CTTTGGTGGAGAGGGGTGTTGGGACTGGATGGACAGTTTATCCTCCTTTGTCAGGAAATG
TGGCTCATTCTGGGGCTTCTGTGGATTTAGCTATTTTTTCTTTGCATCTTGCTGGTGCTT
CTTCTATTTTGGGGGCTATTAATTTTATTTCTACTGTGGGAAATATGCGATCTCCAGGGA
TAGTCGCTGAGCGGATTCCGTTATTTGTTTGGAGTGTTACCGTAACGGCTGTTTTATTAG
TGGCTGCTTTGCCTGTATTAGCTGGTGCTATTACAATGCTACTAACTGATCGTAATTTGA
ATACATCTTTTTTTGACCCTACAGGGGGAGGTGATCCAATTTTATACATACATTTGTTTT

>biv_264_1_Lamellidens_savadiensis
GAACTTTGTACTTGTTGTTAGCATTGTGGTCTGGGTTAATTGGATTAGCTTTGAGGCTTT
TGATTCGAGCCGAGTTGGGACAACCAGGTAGTTTGTTGGGGGATGATCAGTTGTATAATG
TTATTGTAACAGCTCATGCGTTTATAATAATTTTTTTCTTGGTGATGCCAATGATGATTG
GTGGATTTGGGAATTGGTTGATTCCTTTAATGATTGGGGCTCCTGATATGGCTTTTCCTC
GGTTAAATAATTTAAGGTTTTGATTGCTTGTACCTGCCTTATTTCTATTGCTAAGGTCTT
CTTTGGTGGAGAGGGGTGTTGGGACTGGATGGACAGTTTATCCTCCTTTGTCAGGAAATG
TGGCTCATTCTGGGGCTTCTGTGGATTTAGCTATTTTTTCTTTGCATCTTGCTGGTGCTT
CTTCTATTTTGGGGGCCATTAATTTTATTTCTACTGTGGGAAATATGCGATCTCCAGGGA
TAGTCGCTGAGCGGATTCCGCTATTTGTTTGGAGTGTTACTGTAACGGCTGTTTTATTAG
TGGCTGCTTTGCCTGTATTAGCTGGTGCTATTACAATGCTACTAACTGATCGTAATTTAA
ATACATCTTTTTTTGACCCTACAGGGGGAGGTGATCCAATTTTATATATACATTTGTTTT

>biv_427A_2_Lamellidens_savadiensis
GAACTTTGTACTTGTTGTTAGCATTGTGGTCTGGGTTAATTGGATTAGCTTTGAGGCTTT
TGATTCGAGCCGAGTTGGGACAACCAGGTAGTTTGTTGGGGGATGATCAGTTGTATAATG
TTATTGTAACAGCTCATGCGTTTATAATAATTTTTTTCTTGGTGATGCCAATGATGATTG
GTGGATTTGGGAATTGGTTGATTCCTTTAATGATTGGGGCTCCTGATATGGCTTTTCCTC
GGTTAAATAATTTAAGGTTTTGATTGCTTGTACCTGCCTTATTTCTATTGCTAAGGTCTT
CTTTGGTAGAGAGGGGTGTTGGGACTGGATGGACAGTTTATCCTCCTTTGTCAGGAAATG
TGGCTCATTCTGGGGCTTCTGTGGATTTAGCTATTTTTTCTTTGCATCTTGCTGGTGCTT
CTTCTATTTTGGGGGCTATTAATTTTATTTCTACTGTGGGAAATATGCGATCTCCAGGGA
TAGTCGCTGAGCGGATTCCGCTATTTGTTTGGAGTGTTACCGTAACGGCTGTTTTATTAG
TGGCTGCTTTGCCTGTATTAGCTGGTGCTATTACAATGCTACTAACTGATCGTAATTTAA
ATACATCTTTTTTTGACCCTACAGGGGGAGGTGATCCAATTTTATACATACATTTGTTTT

>biv_442_3_Lamellidens_savadiensis
GAACTTTATACTTGTTGTTAGCATTGTGGTCTGGGTTAATTGGATTAGCTTTGAGGCTTT
TGATTCGAGCCGAGTTGGGACAACCAGGTAGTTTGTTGGGGGATGATCAGTTGTATAATG
TTATTGTAACAGCTCATGCGTTTATAATAATTTTTTTCTTGGTGATGCCAATGATGATTG
GTGGATTTGGGAATTGGTTGATTCCTTTAATGATTGGGGCTCCTGATATGGCTTTTCCTC
GGTTAAATAATTTAAGGTTTTGATTGCTTGTACCTGCCTTATTTCTATTGCTAAGGTCTT
CTTTGGTGGAGAGGGGTGTTGGGACTGGATGGACAGTTTATCCTCCTTTGTCAGGAAATG
TGGCTCATTCTGGGGCTTCTGTGGATTTAGCTATTTTTTCTTTGCATCTTGCTGGTGCTT
CTTCTATTTTGGGGGCTATTAATTTTATTTCTACTGTGGGAAATATGCGATCTCCAGGGA
TAGTCGCTGAGCGGATTCCGCTATTTGTTTGGAGTGTTACCGTAACGGCTGTTTTATTAG
TGGCTGCTTTGCCTGTATTAGCTGGTGCTATTACAATGCTACTAACTGATCGTAATTTAA
ATACATCTTTTTTTGACCCTACAGGGGGAGGTGATCCAATTTTATACATACATTTGTTTT

>biv_242_3_Lamellidens_generosus
GAACTTTGTATTTATTGCTAGCGTTGTGGTCTGGATTGATTGGATTAGCTCTGAGACTTT
TGATTCGAGCTGAGTTAGGGCAGCCAGGTAGTTTGTTAGGGGACGATCAGTTATATAATG
TTATTGTAACAGCTCATGCGTTTATAATAATTTTTTTCTTGGTGATGCCAATGATGATTG
GTGGGTTTGGAAACTGGTTGATTCCTTTGATGATTGGGGCTCCTGATATAGCTTTTCCTC
GATTAAATAATTTAAGATTTTGGTTGCTTGTACCTGCTTTATTTTTGTTGTTGAGATCTT
CTTTGGTGGAGAGGGGTGTTGGGACTGGTTGAACGGTTTATCCACCTTTGTCAGGAAATG
TAGCTCATTCTGGGGCTTCCGTTGATTTAGCTATTTTTTCTTTGCATCTTGCCGGTGCTT
CTTCCATTTTGGGGGCTATTAATTTTATTTCTACTGTGGGAAATATGCGGTCTCCGGGCA
TAGTTGCTGAGCGAATTCCGTTATTTGTTTGGAGTGTTACTGTAACGGCTATTTTATTAG
TAGCTGCTTTGCCTGTGTTAGCTGGTGCTATTACTATGCTACTAACTGACCGTAATTTAA
ATACATCTTTCTTTGATCCTACTGGGGGAGGTGATCCAATTCTATATATACACTTGTTTT

>biv_243_10_Lamellidens_generosus
GAACTTTGTATTTATTGCTAGCGTTGTGGTCTGGATTGATTGGATTAGCTTTGAGACTTT
TGATTCGAGCTGAGTTAGGGCAGCCAGGTAGTTTGTTAGGGGACGATCAGTTGTATAATG
TTATTGTAACAGCTCATGCGTTTATAATAATTTTTTTCTTGGTGATGCCAATGATGATTG
GTGGGTTTGGAAACTGGTTGATTCCTTTGATGATTGGGGCTCCTGATATAGCTTTTCCTC
GATTAAATAATTTAAGATTTTGGTTGCTTGTACCTGCTTTATTTTTGTTGTTGAGATCTT
CTTTGGTGGAGAGGGGTGTTGGGACTGGTTGAACGGTTTATCCACCTTTGTCAGGAAATG
TAGCTCATTCTGGGGCTTCCGTTGATTTAGCTATTTTTTCTTTGCATCTTGCCGGTGCTT
CTTCCATTTTGGGGGCTATTAATTTTATTTCTACTGTGGGAAATATGCGGTCTCCGGGCA
TAGTTGCTGAGCGAATTCCGTTATTTGTTTGGAGTGTTACTGTAACGGCTATTTTATTAG
TAGCTGCTTTGCCTGTGTTAGCTGGTGCTATTACTATGCTACTAACTGACCGTAATTTAA
ATACATCTTTCTTTGACCCTACTGGGGGAGGTGATCCAATTCTATATATACACTTGTTTT

>biv_243_14_Lamellidens_generosus
GAACTTTGTATTTATTGCTAGCGTTGTGGTCTGGATTGATTGGATTAGCTCTGAGACTTT
TGATTCGAGCTGAGTTAGGGCAGCCAGGTAGTTTGTTAGGGGACGATCAGTTGTATAATG
TTATTGTAACAGCTCATGCGTTTATAATAATTTTTTTCTTGGTGATGCCAATGATGATTG
GTGGGTTTGGAAACTGGTTGATTCCTTTGATGATTGGGGCTCCTGATATAGCTTTTCCTC
GATTAAATAATTTAAGATTTTGGTTGCTTGTACCTGCTTTATTTTTGTTGTTGAGATCTT
CTTTGGTGGAGAGGGGTGTTGGGACTGGTTGAACGGTTTATCCACCTTTGTCAGGAAATG
TAGCTCATTCTGGGGCTTCCGTTGATTTAGCTATTTTTTCTTTGCATCTTGCCGGTGCTT
CTTCCATTTTGGGGGCTATTAATTTTATTTCTACTGTGGGAAATATGCGGTCTCCGGGCA
TAGTTGCTGAGCGAATTCCGTTATTTGTTTGGAGTGTTACTGTAACGGCTATTTTATTAG
TAGCTGCTTTGCCTGTGTTAGCTGGTGCTATTACTATGCTACTAACTGACCGTAATTTAA
ATACATCTTTCTTTGATCCTACTGGGGGAGGTGATCCAATTCTATATATACACTTGTTTT

>biv_244_2_Lamellidens_generosus
GAACTTTGTATTTATTGCTAGCGTTGTGGTCTGGATTGATTGGATTAGCTCTGAGACTTT
TGATTCGAGCTGAGTTAGGGCAGCCAGGTAGTTTGTTAGGGGACGATCAGTTGTATAATG
TTATTGTAACAGCTCATGCGTTTATAATAATTTTTTTCTTGGTGATGCCAATGATGATTG
GTGGGTTTGGAAACTGGTTGATTCCTTTGATGATTGGGGCTCCTGATATAGCTTTTCCTC
GATTAAATAACTTAAGGTTTTGATTGCTTGTACCTGCTTTATTTTTGTTGTTGAGATCTT
CTTTGGTGGAGAGGGGTGTTGGGACTGGTTGAACGGTTTATCCACCTTTGTCAGGAAATG
TAGCTCATTCTGGGGCTTCCGTTGATTTAGCTATTTTTTCTTTGCATCTTGCCGGTGCTT
CTTCCATTTTGGGGGCTATTAATTTTATTTCTACTGTGGGAAATATGCGGTCTCCGGGCA
TAGTTGCTGAGCGAATTCCGTTATTTGTTTGGAGTGTTACTGTAACGGCTATTTTATTAG
TAGCTGCTTTGCCTGTGTTAGCTGGTGCTATTACTATGCTACTAACTGATCGTAATTTAA
ATACATCTTTCTTTGATCCTACTGGGGGAGGTGATCCAATTCTGTATATACATTTGTTTT

>biv_244_5_Lamellidens_generosus
GAACTTTGTATTTATTGCTAGCGTTGTGGTCTGGATTGATTGGATTAGCTCTGAGACTTT
TGATTCGAGCTGAGTTAGGGCAGCCAGGTAGTTTGTTAGGGGACGATCAGTTGTATAATG
TTATTGTAACAGCTCATGCGTTTATAATAATTTTTTTCTTGGTGATGCCAATGATGATTG
GTGGGTTTGGGAACTGGTTGATTCCTTTGATGATTGGGGCTCCTGATATAGCTTTTCCTC
GATTAAATAACTTAAGGTTTTGATTGCTTGTACCTGCTTTGTTTTTGTTATTGAGATCTT
CTTTGGTGGAGAGGGGTGTTGGGACTGGTTGAACGGTTTATCCACCTTTGTCAGGAAATG
TAGCTCATTCTGGGGCTTCTGTTGATTTAGCTATTTTTTCTCTGCATCTTGCCGGTGCTT
CTTCCATTTTGGGGGCTATTAATTTTATTTCTACTGTGGGAAATATGCGGTCTCCGGGCA
TAGTTGCTGAGCGAATTCCGTTATTTGTTTGGAGTGTTACTGTAACGGCTATTTTATTAG
TAGCTGCTTTGCCTGTGTTAGCTGGTGCTATTACTATGCTACTAACTGATCGTAATTTAA
ATACATCTTTCTTTGATCCTACTGGGGGAGGTGATCCAATTCTGTATATACATTTGTTTT

>biv_247_10_Lamellidens_generosus
GAACTTTGTATTTATTGCTAGCGTTGTGGTCTGGATTGATTGGATTAGCTCTGAGACTTT
TGATTCGAGCTGAGTTAGGGCAGCCAGGTAGTTTGTTAGGGGACGATCAGTTGTATAATG
TTATTGTAACAGCTCATGCGTTTATAATAATTTTTTTCTTGGTGATGCCAATGATGATTG
GTGGGTTTGGAAACTGGTTGATTCCTTTGATGATTGGGGCTCCTGATATAGCTTTTCCTC
GATTAAATAATTTAAGATTTTGGTTGCTTGTACCTGCTTTATTTTTGTTGTTGAGATCTT
CTTTGGTGGAGAGGGGTGTTGGGACTGGTTGAACGGTTTATCCACCTTTGTCAGGAAATG
TAGCTCATTCTGGGGCTTCCGTTGATTTAGCTATTTTTTCTTTGCATCTTGCCGGTGCTT
CTTCTATTTTGGGGGCTATTAATTTTATTTCTACTGTGGGAAATATGCGGTCTCCGGGCA
TAGTTGCTGAGCGAATTCCGTTATTTGTTTGGAGTGTTACTGTAACGGCTATTTTATTAG
TAGCTGCTTTGCCTGTGTTAGCTGGTGCTATTACTATGCTACTAACTGACCGTAATTTAA
ATACATCTTTCTTTGATCCTACTGGGGGAGGTGATCCAATTCTATATATACACTTGTTTT

>biv_355_1_Lamellidens_generosus
GAACTTTGTATTTATTGCTAGCGTTGTGGTCTGGATTGATTGGATTAGCTCTGAGACTTT
TGATTCGAGCTGAGTTAGGGCAGCCAGGTAGTTTATTAGGGGACGATCAGTTGTATAATG
TTATTGTAACAGCTCATGCGTTTATAATAATTTTTTTCTTGGTGATGCCAATGATGATTG
GTGGGTTTGGAAACTGGTTGATTCCTTTGATGATTGGGGCTCCTGATATAGCTTTTCCTC
GATTAAATAATTTAAGGTTTTGATTGCTTGTACCTGCTTTATTTTTGTTGTTGAGATCTT
CTTTGGTGGAGAGGGGTGTTGGGACTGGTTGAACGGTTTATCCACCTTTGTCAGGAAATG
TAGCTCATTCTGGTGCTTCCGTTGATTTAGCTATTTTTTCTTTGCATCTTGCCGGTGCTT
CTTCCATTTTGGGGGCTATTAATTTTATTTCTACTGTGGGAAATATGCGGTCTCCGGGCA
TAGTTGCTGAGCGAATTCCGTTATTTGTTTGGAGTGTTACTGTAACGGCTATTTTATTAG
TAGCTGCTTTGCCTGTATTAGCTGGTGCTATTACTATGCTGCTAACTGATCGTAATTTAA
ATACATCTTTCTTTGATCCTACTGGGGGAGGTGATCCAATTCTGTATATACACTTGTTTT

>biv_355_2_Lamellidens_generosus
GAACTTTGTATTTATTGCTAGCGTTGTGGTCTGGATTGATTGGATTAGCTCTGAGACTTT
TGATTCGAGCTGAGTTAGGGCAGCCAGGTAGTTTATTAGGGGACGATCAGTTGTATAATG
TTATTGTAACAGCTCATGCGTTTATAATAATTTTTTTCTTGGTGATGCCAATGATGATTG
GTGGGTTTGGAAACTGGTTGATTCCTTTGATGATTGGGGCTCCTGATATAGCTTTTCCTC
GGTTAAATAATTTAAGGTTTTGATTGCTTGTACCTGCTTTATTTTTGTTGTTGAGATCTT
CTTTGGTGGAGAGGGGTGTTGGGACTGGTTGAACGGTTTATCCACCTTTGTCAGGAAATG
TAGCTCATTCTGGTGCTTCCGTTGATTTAGCTATTTTTTCTTTACATCTTGCCGGTGCTT
CTTCCATTTTGGGGGCTATTAATTTTATTTCTACTGTGGGAAATATGCGGTCTCCGGGCA
TAGTTGCTGAGCGAATTCCGTTATTTGTTTGGAGTGTTACTGTAACGGCTATTTTATTAG
TAGCTGCTTTGCCTGTATTAGCTGGTGCTATTACTATGCTGCTAACTGATCGTAATTTAA
ATACATCTTTCTTTGATCCTACTGGGGGAGGTGATCCAATTCTGTATATACACTTGTTTT

>biv_359_1_Lamellidens_generosus
GAACTTTGTATTTGTTGCTAGCGTTGTGGTCTGGATTGATTGGATTAGCTCTGAGACTTT
TGATTCGAGCTGAGTTAGGGCAGCCAGGTAGTTTGTTAGGGGACGATCAGTTGTATAATG
TTATTGTAACAGCTCATGCGTTTATAATAATTTTTTTCTTGGTGATGCCAATGATGATTG
GTGGGTTTGGGAACTGGTTGATTCCTTTGATGATTGGGGCTCCTGATATAGCTTTTCCTC
GATTAAATAATTTAAGGTTTTGATTGCTTGTACCTGCTTTATTTTTGTTGTTGAGATCTT
CTTTGGTGGAGAGGGGTGTTGGGACTGGTTGAACGGTTTATCCACCTTTGTCAGGGAATG
TAGCTCATTCCGGGGCTTCCGTTGATTTAGCCATTTTTTCTTTGCATCTTGCCGGTGCTT
CTTCCATTTTGGGGGCTATTAATTTTATTTCTACTGTGGGAAATATGCGGTCTCCGGGCA
TGGTTGCTGAGCGAATTCCGTTATTTGTTTGGAGTGTTACTGTAACGGCTATTTTATTAG
TAGCTGCTTTGCCTGTGTTAGCTGGTGCTATTACTATGCTACTAACTGACCGTAACTTAA
ATACATCTTTCTTTGATCCTACTGGGGGAGGTGATCCAATTCTATATATACACTTGTTTT

>biv_363_1_Lamellidens_generosus
GAACTTTGTATTTATTGCTAGCGTTGTGGTCTGGATTGATTGGATTAGCTCTGAGACTTT
TGATTCGAGCTGAGTTAGGGCAGCCAGGTAGTTTGTTAGGGGACGATCAGTTGTATAATG
TTATTGTAACAGCTCATGCGTTTATAATAATTTTTTTCTTGGTGATGCCAATGATGATTG
GTGGGTTTGGAAACTGGTTGATTCCTTTGATGATTGGGGCTCCTGATATAGCTTTTCCTC
GATTAAATAATTTAAGGTTTTGATTGCTTGTACCTGCTTTATTTTTGTTGTTGAGATCTT
CTTTGGTGGAGAGGGGTGTTGGGACTGGTTGAACGGTTTATCCACCTTTGTCAGGGAATG
TAGCTCATTCCGGGGCTTCCGTTGATTTAGCTATTTTTTCTTTGCATCTTGCCGGTGCTT
CTTCCATTTTGGGGGCTATTAATTTTATTTCTACTGTGGGAAATATGCGGTCTCCGGGCA
TGGTTGCTGAGCGAATTCCGTTATTTGTTTGGAGTGTTACTGTAACGGCTATTTTATTAG
TAGCTGCTTTGCCTGTGTTAGCTGGTGCTATTACTATGCTACTAACTGACCGTAACTTAA
ATACATCTTTCTTTGATCCTACTGGGGGAGGCGATCCAATTCTATATATACACTTGTTTT

>biv_363_2_Lamellidens_generosus
GAACTTTGTATTTATTGCTAGCGTTGTGGTCTGGATTGATTGGATTAGCTCTGAGACTTT
TGATTCGAGCTGAGTTAGGGCAGCCAGGTAGTTTGTTAGGGGACGATCAGTTGTATAATG
TTATTGTAACAGCTCATGCGTTTATAATAATTTTTTTCTTGGTGATGCCAATGATGATTG
GTGGGTTTGGGAACTGGTTGATTCCTTTGATGATTGGGGCTCCTGATATAGCTTTTCCTC
GATTAAATAATTTAAGGTTTTGATTGCTTGTACCTGCTTTATTTTTGTTGTTGAGATCTT
CTTTGGTGGAGAGGGGTGTTGGGACTGGTTGAACGGTTTATCCACCTTTGTCAGGGAATG
TAGCTCATTCCGGGGCTTCCGTTGATTTAGCCATTTTTTCTTTGCATCTTGCCGGTGCTT
CTTCCATTTTGGGGGCTATTAATTTTATTTCTACTGTGGGAAATATGCGGTCTCCGGGCA
TGGTTGCTGAGCGAATTCCGTTATTTGTTTGGAGTGTTACTGTAACGGCTATTTTATTAG
TAGCTGCTTTGCCTGTGTTAGCTGGTGCTATTACTATGCTACTAACTGACCGTAACTTAA
ATACATCTTTCTTTGATCCTACTGGGGGAGGTGATCCAATTCTATATATACACTTGTTTT

>biv_365_2_Lamellidens_generosus
GAACTTTGTATTTATTGCTAGCGTTGTGGTCTGGATTGATTGGATTAGCTCTGAGACTTT
TGATTCGAGCTGAGTTAGGGCAGCCAGGTAGTTTGTTAGGGGACGATCAGTTGTATAATG
TTATTGTAACAGCTCATGCGTTTATAATAATTTTTTTCTTGGTGATGCCAATGATGATTG
GTGGGTTTGGGAACTGGCTGATTCCTTTGATGATTGGGGCTCCTGATATAGCTTTTCCTC
GATTAAATAATTTAAGGTTTTGATTGCTTGTACCTGCTTTATTTTTGTTGTTGAGATCTT
CTTTGGTGGAGAGGGGTGTTGGGACTGGTTGAACGGTTTATCCACCTTTGTCAGGGAATG
TAGCTCATTCCGGGGCTTCCGTTGATTTAGCCATTTTTTCTTTGCATCTTGCCGGTGCTT
CTTCCATTTTGGGGGCTATTAATTTTATTTCTACTGTGGGAAATATGCGGTCTCCGGGCA
TGGTTGCTGAGCGAATTCCGTTATTTGTTTGGAGTGTTACTGTAACGGCTATTTTATTAG
TAGCTGCTTTGCCTGTGTTAGCTGGTGCTATTACTATGCTACTAACTGACCGTAACTTAA
ATACATCTTTCTTTGATCCTACTGGGGGAGGTGATCCAATTCTATATATACACTTGTTTT

>biv_372_2_Lamellidens_generosus
GAACTTTGTATTTATTGCTAGCGTTGTGGTCTGGATTGATTGGATTAGCTCTGAGACTTT
TGATTCGAGCTGAGTTAGGGCAGCCAGGTAGTTTGTTAGGGGACGATCAGTTGTATAATG
TTATTGTAACAGCTCATGCGTTTATAATAATTTTTTTCTTGGTGATGCCAATGATGATTG
GAGGGTTTGGGAACTGGTTGATTCCTTTGATGATTGGGGCTCCTGATATAGCTTTTCCTC
GATTAAATAATTTAAGGTTTTGATTGCTTGTACCTGCTTTATTTTTGTTGTTGAGATCTT
CTTTGGTGGAGAGGGGTGTTGGGACTGGTTGAACGGTTTATCCACCTTTGTCAGGGAATG
TAGCTCATTCCGGGGCTTCCGTTGATTTAGCCATTTTTTCTTTGCATCTTGCCGGTGCTT
CTTCCATTTTGGGGGCTATTAATTTTATTTCTACTGTGGGAAATATGCGGTCTCCGGGCA
TGGTTGCTGAGCGAATTCCGTTATTTGTTTGGAGTGTTACTGTAACGGCTATTTTATTAG
TAGCTGCTTTGCCTGTGTTAGCTGGTGCTATTACTATGCTACTAACTGACCGTAACTTAA
ATACATCTTTCTTTGATCCTACTGGGGGAGGTGATCCAATTCTATATATACACTTGTTTT

>biv_372_3_Lamellidens_generosus
GAACTTTGTATTTATTGCTAGCGTTGTGGTCTGGATTGATTGGATTAGCTCTGAGACTTT
TGATTCGAGCTGAGTTAGGGCAGCCAGGTAGTTTGTTAGGGGACGATCAGTTGTATAATG
TTATTGTAACAGCTCATGCGTTTATAATAATTTTTTTCTTGGTGATGCCAATGATGATTG
GTGGGTTTGGGAACTGGTTGATTCCTTTGATGATTGGGGCTCCTGATATAGCTTTTCCTC
GATTAAATAATTTGAGGTTTTGATTGCTTGTACCTGCTTTATTTTTGTTGTTGAGATCTT
CTTTGGTGGAGAGGGGTGTTGGGACTGGTTGAACGGTTTATCCACCTTTGTCAGGGAATG
TAGCTCATTCCGGGGCTTCCGTTGATTTAGCCATTTTTTCTTTGCATCTTGCCGGTGCTT
CTTCCATTTTGGGGGCTATTAATTTTATTTCTACTGTGGGAAATATGCGGTCTCCGGGCA
TGGTTGCTGAGCGAATTCCGTTATTTGTTTGGAGTGTTACTGTAACGGCTATTTTATTAG
TAGCTGCTTTGCCTGTGTTAGCTGGTGCTATTACTATGCTACTAACTGACCGTAACTTAA
ATACATCTTTCTTTGATCCTACTGGGGGAGGTGATCCAATTCTATATATACACTTGTTTT

>biv_376_1_Lamellidens_generosus
GAACTTTGTATTTATTGCTAGCGTTGTGGTCTGGATTGATTGGATTAGCTCTGAGACTTT
TGATTCGAGCTGAGTTAGGGCAGCCAGGTAGTTTGTTAGGGGACGATCAGTTGTATAATG
TTATTGTAACAGCTCATGCGTTTATAATAATTTTTTTCTTGGTGATGCCAATGATGATTG
GTGGGTTTGGAAACTGGTTGATTCCTTTGATGATTGGGGCTCCTGATATAGCTTTTCCTC
GATTAAATAACTTAAGGTTTTGATTGCTTGTACCTGCTTTATTTTTGTTGTTGAGATCTT
CTTTGGTGGAGAGGGGTGTTGGGACTGGTTGAACGGTTTATCCACCTTTGTCAGGAAATG
TAGCTCATTCTGGGGCTTCCGTTGATTTAGCTATTTTTTCTTTGCATCTTGCCGGTGCTT
CTTCCATTTTGGGGGCTATTAATTTTATTTCTACTGTGGGAAATATGCGGTCTCCGGGCA
TAGTTGCTGAGCGAATTCCGTTATTTGTTTGGAGTGTTACTGTAACGGCTATTTTATTAG
TAGCTGCTTTGCCTGTGTTAGCTGGTGCTATTACTATGCTATTGACTGACCGTAATTTAA
ATACATCTTTCTTTGATCCTACTGGGGGAGGTGATCCAATTCTGTATATACACTTGTTTT

>biv_376_2_Lamellidens_generosus
GAACTTTGTATTTATTGCTAGCGTTGTGGTCTGGATTGATTGGATTAGCTCTGAGACTTT
TGATTCGAGCTGAGTTAGGGCAGCCAGGTAGTTTGTTAGGGGACGATCAGTTGTATAATG
TTATTGTAACAGCTCATGCGTTTATAATAATTTTTTTCTTGGTGATGCCAATGATGATTG
GTGGGTTTGGGAATTGGTTGATTCCTTTGATGATTGGGGCTCCTGATATAGCTTTTCCTC
GATTAAATAACTTAAGGTTTTGATTGCTTGTACCTGCTTTGTTTTTGTTATTGAGATCTT
CTTTGGTGGAGAGGGGTGTTGGGACTGGTTGAACGGTTTATCCACCTTTGTCAGGAAATG
TAGCTCATTCTGGGGCTTCTGTTGATTTAGCTATTTTTTCTCTGCATCTTGCCGGTGCTT
CTTCCATTTTGGGGGCTATTAATTTTATTTCTACTGTGGGAAATATGCGGTCTCCGGGCA
TAGTTGCTGAGCGAATTCCGTTATTTGTTTGGAGTGTTACTGTAACGGCTATTTTATTAG
TAGCTGCTTTGCCTGTGTTAGCTGGTGCTATTACTATGCTATTAACTGATCGTAATTTAA
ATACATCTTTCTTTGATCCTACTGGGGGAGGTGATCCAATTCTGTATATACATTTGTTTT

>biv_376_3_Lamellidens_generosus
GAACTTTGTATTTATTGCTAGCGTTGTGGTCTGGATTGATTGGATTAGCTCTGAGACTTT
TGATTCGAGCTGAGTTAGGGCAGCCAGGTAGTTTGTTAGGGGACGATCAGTTGTATAATG
TTATTGTAACAGCTCATGCGTTTATAATAATTTTTTTCTTGGTGATGCCAATGATGATTG
GTGGGTTTGGAAACTGGTTGATTCCTTTGATGATTGGGGCTCCTGATATAGCTTTTCCTC
GATTAAATAATTTAAGGTTTTGGTTGCTTGTACCTGCTTTATTTTTGTTGTTGAGATCTT
CTTTGGTGGAGAGGGGTGTTGGGACTGGTTGAACGGTTTATCCACCTTTGTCAGGAAATG
TAGCTCATTCTGGGGCTTCCGTTGATTTAGCTATTTTTTCTTTGCATCTTGCCGGTGCTT
CTTCCATTTTGGGGGCTATTAATTTTATTTCTACTGTGGGAAATATGCGGTCTCCGGGCA
TAGTTGCTGAGCGAATTCCGTTATTTGTTTGGAGTGTTACTGTAACGGCTATTTTATTAG
TAGCTGCTTTGCCTGTGTTAGCTGGTGCTATTACTATGCTACTAACTGACCGTAATTTAA
ATACATCTTTCTTTGATCCAACTGGGGGAGGTGATCCAATTCTATATATACACTTGTTTT

>biv_387_1_Lamellidens_generosus
GAACTTTGTATTTATTGCTAGCGTTGTGGTCTGGATTGATTGGATTAGCTCTGAGACTTT
TGATTCGAGCTGAGTTAGGGCAGCCAGGTAGTATGTTAGGGGACGATCAGTTGTATAATG
TTATTGTAACAGCTCATGCGTTTATAATAATTTTTTTCTTGGTGATGCCGATGATGATTG
GTGGGTTTGGGAACTGGTTGATTCCTTTGATGATTGGGGCTCCTGATATAGCTTTTCCTC
GATTAAATAACTTAAGGTTTTGATTGCTTGTACCTGCTTTGTTTTTGTTATTGAGATCTT
CTTTGGTGGAGAGGGGTGTTGGGACTGGTTGAACGGTTTATCCACCTTTGTCAGGAAATG
TAGCTCATTCTGGGGCTTCTGTTGATTTAGCTATTTTTTCTCTGCATCTTGCCGGTGCTT
CTTCCATTTTGGGGGCTATTAATTTTATTTCTACTGTGGGAAATATGCGGTCTCCGGGCA
TAGTTGCTGAGCGAATTCCGTTATTTGTTTGGAGTGTTACTGTAACGGCTATTTTATTAG
TAGCTGCTTTGCCTGTGTTAGCTGGTGCTATTACTATGCTACTAACTGATCGTAATTTAA
ATACATCTTTCTTTGATCCTACTGGGGGAGGTGATCCAATTCTGTATATACATTTGTTTT

>biv_636_2_Lamellidens_generosus
GAACTTTGTATTTATTGCTAGCGTTGTGGTCTGGATTGATTGGATTAGCTCTGAGACTTT
TGATTCGAGCTGAGTTAGGGCAGCCAGGTAGTTTGTTAGGGGACGATCAGTTGTATAATG
TTATTGTAACAGCTCATGCGTTTATAATAATTTTTTTCTTGGTGATGCCAATGATGATTG
GTGGGTTTGGAAACTGGTTGATTCCTTTGATGATTGGGGCTCCTGATATAGCTTTTCCTC
GATTAAATAATTTAAGGTTTTGATTGCTTGTACCTGCTTTATTTTTGTTGTTGAGATCTT
CTTTGGTGGAGAGGGGTGTTGGGACTGGTTGAACGGTTTATCCACCTTTGTCAGGGAATG
TAGCTCATTCCGGGGCTTCCGTTGATTTAGCTATTTTTTCTTTGCATCTTGCCGGTGCTT
CTTCCATTTTGGGGGCTATTAATTTTATTTCTACTGTGGGAAATATGCGGTCTCCGGGCA
TGGTTGCTGAGCGAATTCCGTTATTTGTTTGGAGTGTTACTGTAACGGCTATTTTATTAG
TAGCTGCTTTGCCTGTGTTAGCTGGTGCTATTACTATGCTACTAACTGACCGTAACTTAA
ATACATCTTTCTTTGATCCTACTGGGGGAGGTGATCCAATTCTATATATACACTTGTTTT

>biv_648_1_Lamellidens_generosus
GGACTTTGTATTTATTGCTAGCGTTGTGGTCTGGATTGATTGGATTAGCTCTGAGACTTT
TGATTCGAGCTGAGTTAGGGCAGCCAGGTAGTTTGTTAGGGGACGATCAGTTGTATAATG
TTATTGTAACAGCTCATGCGTTTATAATAATTTTTTTCTTGGTGATGCCAATGATGATTG
GTGGGTTTGGGAACTGGTTGATTCCTTTGATGATTGGGGCTCCTGATATAGCTTTTCCTC
GATTAAATAACTTAAGGTTTTGATTGCTTGTACCTGCTTTGTTTTTGTTGTTGAGATCTT
CTTTGGTGGAGAGGGGTGTTGGGACTGGTTGAACGGTTTATCCACCTTTGTCAGGAAATG
TAGCTCATTCTGGGGCTTCTGTTGATTTAGCTATTTTTTCTTTGCATCTTGCCGGTGCTT
CTTCCATTTTGGGGGCTATTAATTTTATTTCTACTGTGGGAAATATGCGGTCTCCGGGCA
TAGTTGCTGAGCGAATTCCGTTATTTGTTTGGAGTGTTACTGTAACGGCTATTTTATTAG
TAGCTGCTTTGCCTGTGTTAGCTGGTGCTATTACTATGCTACTAACTGATCGTAATTTAA
ATACATCTTTCTTTGATCCTACTGGGGGAGGTGATCCAATTCTGTATATACACTTGTTTT

>biv_648_2_Lamellidens_generosus
GAACTTTGTATTTATTGCTAGCGTTGTGGTCTGGATTGATTGGATTAGCTCTGAGACTTT
TGATTCGAGCTGAGTTAGGGCAGCCAGGTAGTTTGTTAGGGGACGATCAGTTGTATAATG
TTATTGTAACAGCTCATGCGTTTATAATAATTTTTTTCTTGGTGATGCCAATGATGATTG
GTGGGTTTGGGAACTGGTTGATTCCTTTGATGATTGGGGCTCCTGATATAGCTTTTCCTC
GATTAAATAACTTAAGGTTTTGATTGCTTGTACCTGCTTTGTTTTTGTTGTTGAGATCTT
CTTTGGTGGAGAGGGGTGTTGGGACTGGTTGAACGGTTTATCCACCTTTGTCAGGAAATG
TAGCTCATTCTGGGGCTTCTGTTGATTTAGCTATTTTTTCTTTGCATCTTGCCGGTGCTT
CTTCCATTTTGGGGGCTATTAATTTTATTTCTACTGTGGGAAATATGCGGTCTCCGGGCA
TAGTTGCTGAGCGAATTCCGTTATTTGTTTGGAGTGTTACTGTAACGGCTATTTTATTAG
TAGCTGCTTTGCCTGTGTTAGCTGGTGCTATTACTATGCTACTAACTGATCGTAATTTAA
ATACATCTTTCTTTGATCCTACTGGGGGAGGTGATCCAATTCTGTATATACACTTGTTTT

>biv_672_1_Lamellidens_generosus
GGACTTTGTATTTATTGCTAGCGTTGTGGTCTGGATTGATTGGATTAGCTCTGAGACTTT
TGATTCGAGCTGAGTTAGGGCAGCCAGGTAGTTTGTTAGGGGACGATCAGTTGTATAATG
TTATTGTAACAGCTCATGCGTTTATAATAATTTTTTTCTTGGTGATGCCAATGATGATTG
GTGGGTTTGGGAACTGGTTGATTCCTTTGATGATTGGGGCTCCTGATATAGCTTTTCCTC
GATTAAATAACTTAAGGTTTTGATTGCTTGTACCTGCTTTGTTTTTGTTGTTGAGATCTT
CTTTGGTGGAGAGGGGTGTTGGGACTGGTTGAACGGTTTATCCACCTTTGTCAGGAAATG
TAGCTCATTCTGGGGCTTCTGTTGATTTAGCTATTTTTTCTCTGCATCTTGCCGGTGCTT
CTTCCATTTTGGGGGCTATTAATTTTATTTCTACTGTGGGAAATATGCGGTCTCCGGGCA
TAGTTGCTGAGCGAATTCCGTTATTTGTTTGGAGTGTTACTGTAACGGCTATTTTATTAG
TAGCTGCTTTGCCTGTGTTAGCTGGTGCTATTACTATGCTACTAACTGATCGTAATTTAA
ATACATCTTTCTTTGATCCTACTGGGGGAGGTGATCCAATTCTGTATATACATTTGTTTT

>biv_1024_2_Lamellidens_generosus
GAACTTTGTATTTATTGCTAGCGTTGTGGTCTGGATTGATTGGATTAGCTCTGAGACTTT
TGATTCGAGCTGAGTTAGGGCAGCCAGGTAGTTTGTTAGGGGACGATCAGTTGTATAATG
TTATTGTAACAGCTCATGCGTTTATAATAATTTTTTTCTTGGTGATGCCAATGATGATTG
GTGGGTTTGGGAACTGGTTGATTCCTTTGATGATTGGGGCTCCTGATATAGCTTTTCCTC
GATTAAATAATTTAAGGTTTTGATTGCTTGTACCTGCTTTATTTTTGTTGTTGAGATCTT
CTTTGGTGGAGAGGGGTGTTGGGACTGGTTGAACGGTTTATCCACCTTTGTCAGGGAATG
TGGCTCATTCCGGGGCTTCCGTTGATTTAGCTATTTTTTCTTTGCATCTTGCCGGTGCTT
CTTCCATTTTGGGGGCTATTAATTTTATTTCTACTGTGGGAAATATGCGGTCTCCGGGCA
TGGTTGCTGAGCGAATTCCGTTATTTGTTTGGAGTGTTACTGTAACGGCTATTTTATTAG
TAGCTGCTTTGCCTGTGTTAGCTGGTGCTATTACTATGCTACTAACTGACCGTAACTTAA
ATACATCTTTCTTTGATCCTACTGGGGGAGGTGATCCAATTCTATATATACACTTGTTTT

>biv 112_7_Lamellidens_ferrugineus
GGACCTGGTATTTATTATTAGCATTGTGGTCTGGGTTGATTGGGTTAGCTTTGAGGCTTT
TGATTCGAGCTGAGTTAGGACAACCAGGTAGTTTGCTAGGGGATGATCAGTTATATAATG
TTATTGTAACAGCTCATGCATTTATGATAATTTTTTTCTTGGTGATGCCAATGATAATTG
GTGGGTTTGGAAATTGGTTGATTCCTTTGATGATTGGGGCTCCTGATATAGCTTTTCCTC
GATTGAATAATTTAAGGTTTTGATTGCTTGTACCTGCTTTGTTTTTGTTGTTGAGGTCTT
CTCTGGTGGAGAGGGGCGTTGGAACTGGTTGAACGGTTTATCCACCCTTGTCAGGAAATG
TGGCCCATTCTGGGGCTTCTGTTGATTTAGCTATTTTCTCTTTGCATCTTGCTGGTGCTT
CTTCTATTCTGGGGGCTATTAATTTTATCTCTACTGTGGGAAATATGCGGTCTCCGGGGA
TAGTTGCTGAGCGAATTCCATTATTTGTTTGGAGTGTTACTGTAACGGCTATTTTATTGG
TAGCTGCTTTGCCTGTGTTAGCTGGTGCTATTACTATGTTATTAACTGATCGTAATTTAA
ACACATCTTTCTTTGATCCTACTGGGGGAGGTGATCCAATTCTGTACATGCACTTGTTTT

>biv_113_8_Lamellidens_ferrugineus
GAACCTTGTATTTATTATTAGCATTGTGGTCTGGGTTGATTGGGTTAGCTTTGAGGCTTT
TGATTCGAGCTGAGTTAGGACAACCAGGTAGTTTGCTAGGGGATGATCAGTTATATAATG
TCATTGTAACAGCTCATGCATTTATGATAATTTTTTTCTTGGTGATGCCAATGATAATTG
GTGGGTTTGGAAATTGGTTGATTCCTTTGATGATTGGGGCTCCTGATATAGCTTTTCCTC
GATTGAATAATTTAAGGTTTTGATTGCTTGTACCTGCTTTGTTTTTGTTGTTGAGATCTT
CTCTGGTGGAGAGGGGCGTTGGAACTGGTTGAACGGTTTATCCACCCTTGTCAGGAAATG
TGGCCCATTCTGGGGCTTCTGTTGATTTAGCTATTTTCTCTTTGCACCTTGCTGGTGCTT
CTTCTATTCTGGGGGCTATTAATTTTATCTCTACTGTGGGAAATATGCGGTCTCCGGGGA
TAGTTGCTGAGCGAATTCCATTATTTGTTTGGAGTGTTACTGTAACGGCTATTTTATTGG
TAGCTGCTTTGCCTGTGTTAGCTGGTGCTATTACTATGTTATTAACTGATCGTAATTTAA
ACACATCTTTCTTTGATCCTACTGGGGGAGGTGATCCAATTCTGTACATGCACTTGTTTT

>biv_113_12_Lamellidens_ferrugineus
GAACCTTGTATTTATTATTAGCATTGTGGTCTGGGTTGATTGGGTTAGCTTTGAGGCTTT
TGATTCGAGCTGAGTTAGGACAACCAGGTAGTTTGCTAGGGGATGATCAGTTATATAATG
TCATTGTAACAGCTCATGCATTTATGATAATTTTTTTCTTGGTGATGCCTATGATAATTG
GTGGGTTTGGAAATTGGTTGATTCCTTTGATGATTGGGGCTCCTGATATAGCTTTTCCTC
GATTGAATAATTTAAGGTTTTGATTGCTTGTACCTGCTTTGTTTTTGTTGTTGAGATCTT
CTCTGGTGGAGAGGGGCGTTGGAACTGGTTGAACGGTTTATCCACCCTTGTCAGGAAATG
TGGCCCATTCTGGGGCTTCTGTTGATTTAGCTATTTTCTCTTTGCACCTTGCTGGTGCTT
CTTCTATTCTGGGGGCTATTAATTTTATCTCTACTGTGGGAAATATGCGGTCTCCGGGGA
TAGTTGCTGAGCGAATTCCATTATTTGTTTGGAGTGTTACTGTAACGGCTATTTTATTGG
TAGCTGCTTTGCCTGTGTTAGCTGGTGCTATTACTATGTTATTAACTGATCGTAATTTAA
ACACATCTTTCTTTGATCCTACTGGGGGAGGTGATCCAATTCTGTACATGCACTTGTTTT

>biv_113_14_Lamellidens_ferrugineus
GGACCTTGTATTTATTATTAGCGTTGTGGTCTGGGTTGATTGGGTTAGCTTTGAGGCTTT
TGATTCGAGCTGAGTTAGGACAACCAGGTAGTTTGCTAGGGGATGATCAGTTATATAATG
TTATTGTAACAGCTCATGCATTTATGATAATTTTTTTCTTGGTGATGCCAATGATAATTG
GTGGGTTTGGAAATTGGCTGATTCCTTTGATGATTGGGGCTCCTGATATAGCTTTTCCTC
GATTGAATAATTTAAGGTTTTGATTGCTTGTACCTGCTTTGTTTTTGTTGTTGAGGTCTT
CTCTGGTGGAGAGGGGCGTTGGAACTGGTTGAACGGTTTATCCACCATTGTCAGGAAATG
TGGCCCATTCTGGGGCTTCTGTTGATTTAGCTATTTTCTCTTTGCATCTTGCTGGTGCTT
CTTCTATTCTGGGGGCTATTAATTTTATCTCTACTGTGGGAAATATGCGGTCTCCGGGGA
TAGTTGCTGAGCGAATTCCATTATTTGTTTGGAGTGTTACTGTAACGGCTATTTTATTGG
TAGCTGCTTTGCCTGTGTTAGCTGGTGCTATTACCATGTTATTAACTGATCGTAATTTAA
ACACATCTTTCTTTGATCCTACTGGGGGAGGTGATCCAATTCTGTACATGCACTTGTTTT

>biv_141_5_Lamellidens_ferrugineus
GAACCTTGTATTTATTATTAGCATTGTGGTCTGGGTTGATTGGGTTAGCTTTGAGGCTTT
TGATTCGAGCTGAGTTAGGACAACCAGGTAGTTTGTTAGGGGATGATCAGTTATATAATG
TCATTGTAACAGCTCATGCATTTATGATAATTTTTTTCTTGGTGATGCCAATGATAATTG
GTGGGTTTGGAAATTGGTTGATTCCTTTGATGATTGGGGCTCCTGATATAGCTTTTCCTC
GATTGAATAATTTAAGGTTTTGATTGCTTGTACCTGCTTTGTTTTTGTTGTTGAGATCTT
CTCTGGTGGAGAGGGGCGTTGGAACTGGTTGAACGGTTTATCCACCCTTGTCAGGAAATG
TGGCCCATTCTGGGGCTTCTGTTGATTTAGCTATTTTCTCTTTGCACCTTGCTGGTGCTT
CTTCTATTCTGGGGGCTATTAATTTTATCTCTACTGTGGGAAATATGCGGTCTCCGGGGA
TAGTTGCTGAGCGAATTCCATTATTTGTTTGGAGTGTTACTGTAACGGCTGTTTTATTGG
TAGCTGCTTTGCCTGTGTTAGCTGGTGCTATTACTATGTTATTAACTGATCGTAATTTAA
ACACATCTTTCTTTGATCCTACTGGGGGAGGTGATCCAATTCTGTACATGCACTTGTTTT

>biv_141_9_Lamellidens_ferrugineus
GAACCTTGTATTTATTATTAGCATTGTGGTCTGGGTTGATTGGGTTAGCTTTGAGGCTTT
TGATTCGAGCTGAGTTAGGACAACCAGGTAGTTTGCTGGGGGATGATCAGTTATATAATG
TCATTGTAACAGCTCATGCATTTATGATAATTTTTTTCTTGGTGATGCCAATGATAATTG
GTGGGTTTGGAAATTGGTTGATTCCTTTGATGATTGGGGCTCCTGATATAGCTTTTCCTC
GATTGAATAATTTAAGGTTTTGATTGCTTGTACCTGCTTTGTTTTTGTTGTTGAGATCTT
CTCTGGTGGAGAGGGGCGTTGGAACTGGTTGAACGGTTTATCCACCCTTGTCAGGAAATG
TGGCCCATTCTGGGGCTTCTGTTGATTTAGCTATTTTCTCTTTGCACCTTGCTGGTGCTT
CTTCTATTCTGGGGGCTATTAATTTTATCTCTACTGTGGGAAATATGCGGTCTCCGGGGA
TAGTTGCTGAGCGAATTCCATTATTTGTTTGGAGTGTTACTGTAACGGCTATTTTATTGG
TAGCTGCTTTGCCTGTGTTAGCTGGTGCTATTACTATGTTATTAACTGATCGTAATTTAA
ACACATCTTTCTTTGATCCTACTGGGGGAGGTGATCCAATTCTGTACATGCACTTGTTTT

>biv_141_18_Lamellidens_ferrugineus
GGACCTTGTATTTATTATTAGCATTGTGGTCTGGGTTGATTGGGTTAGCTTTGAGGCTTT
TGATTCGAGCTGAGTTAGGACAACCAGGTAGTTTGCTAGGGGATGATCAGTTATATAATG
TTATTGTAACAGCTCATGCATTTATGATAATTTTTTTCTTGGTGATGCCAATGATAATTG
GTGGGTTTGGAAATTGGTTGATTCCTTTGATGATTGGGGCTCCTGATATAGCTTTTCCTC
GATTGAATAATTTAAGGTTTTGATTGCTTGTACCTGCTTTGTTTTTGTTGTTGAGGTCTT
CTCTGGTGGAGAGGGGCGTTGGAACTGGTTGAACGGTTTATCCACCCTTGTCAGGAAATG
TGGCCCATTCTGGGGCTTCTGTTGATTTAGCTATTTTCTCTTTGCATCTTGCTGGTGCTT
CTTCTATTCTGGGGGCTATTAATTTTATCTCTACTGTGGGAAATATGCGGTCTCCGGGGA
TAGTTGCTGAGCGAATTCCATTATTTGTTTGGAGTGTTACTGTAACGGCTATTTTATTGG
TAGCTGCTTTGCCTGTGTTAGCTGGTGCTATTACTATGTTATTAACTGATCGTAATTTAA
ACACATCTTTCTTTGATCCTACTGGGGGAGGTGATCCAATTCTGTACATGCACTTGTTTT

>biv_397_1_Lamellidens_ferrugineus
GGACCTTGTATTTATTATTAGCATTGTGGTCTGGGTTGATTGGGTTAGCTTTGAGGCTTT
TGATTCGAGCTGAGTTAGGACAACCAGGTAGTTTGCTAGGGGATGATCAGTTATATAATG
TTATTGTAACAGCTCATGCATTTATGATAATTTTTTTCTTGGTGATGCCAATGATAATTG
GTGGGTTTGGAAATTGGTTGATTCCTTTGATGATTGGGGCTCCTGATATAGCTTTTCCTC
GATTGAATAATTTAAGGTTTTGATTGCTTGTACCTGCTTTGTTTTTGTTGTTGAGGTCTT
CTCTGGTGGAGAGGGGCGTTGGAACTGGTTGAACGGTTTATCCACCCTTGTCAGGAAATG
TGGCCCATTCTGGGGCTTCTGTTGATTTAGCTATTTTCTCTTTGCATCTTGCTGGTGCTT
CTTCTATTCTGGGGGCTATTAATTTTATCTCTACTGTGGGAAATATGCGGTCTCCGGGGA
TAGTTGCTGAGCGAATTCCATTATTTGTTTGGAGTGTTACTGTAACGGCTATTTTATTGG
TAGCTGCTTTGCCTGTGTTAGCTGGTGCTATTACTATGTTATTGACTGATCGTAATTTAA
ACACATCTTTCTTTGATCCCACTGGGGGAGGTGATCCAATTCTGTACATGCACTTGTTTT

>biv_397_2_Lamellidens_ferrugineus
GGACCTTGTATTTATTATTAGCGTTGTGGTCTGGGTTGATTGGGTTAGCTTTGAGGCTTT
TGATTCGAGCTGAGTTAGGACAACCAGGTAGTTTGCTAGGGGATGATCAGTTATATAATG
TTATTGTAACAGCTCATGCATTTATGATAATTTTTTTCTTGGTGATGCCAATGATAATTG
GTGGGTTTGGAAATTGGCTGATTCCTTTGATGATTGGGGCTCCTGATATAGCTTTTCCTC
GATTGAATAATTTAAGGTTTTGATTGCTTGTACCTGCTTTGTTTTTGTTGTTGAGGTCTT
CTCTGGTGGAGAGGGGCGTTGGAACTGGTTGAACGGTTTATCCACCCTTGTCAGGAAATG
TGGCCCATTCTGGGGCTTCTGTTGATTTAGCTATTTTCTCTTTGCATCTTGCTGGTGCTT
CTTCTATTCTGGGGGCTATTAATTTTATCTCTACTGTGGGAAATATGCGGTCTCCGGGGA
TAGTTGCTGAGCGAATTCCATTATTTGTTTGGAGTGTTACTGTAACGGCTATTTTATTGG
TAGCTGCTTTGCCTGTGTTAGCTGGTGCTATTACTATGTTACTAACTGATCGTAATTTAA
ACACATCTTTCTTTGATCCCACTGGGGGAGGTGATCCAATTCTGTACATGCACTTGTTTT

>biv_398_3_Lamellidens_ferrugineus
GGACCTTGTATTTATTATTAGCATTGTGGTCTGGGTTGATTGGGTTAGCTTTGAGGCTTT
TGATTCGAGCTGAGTTAGGACAACCAGGTAGTTTGCTAGGGGATGATCAGTTATATAATG
TTATTGTAACAGCTCATGCATTTATGATAATTTTTTTCTTGGTGATGCCAATGATAATTG
GTGGGTTTGGAAATTGGTTGATTCCTTTGATGATTGGGGCTCCTGATATAGCTTTTCCTC
GATTGAATAATTTAAGGTTTTGATTGCTTGTACCTGCTTTGTTTTTGTTGTTGAGGTCTT
CTCTGGTGGAGAGGGGCGTTGGAACTGGTTGAACGGTTTATCCACCCTTGTCAGGAAATG
TGGCCCATTCTGGGGCTTCTGTTGATTTAGCTATTTTCTCTTTGCATCTTGCTGGTGCTT
CTTCTATTCTGGGGGCTATTAATTTTATCTCTACTGTGGGAAATATGCGGTCTCCGGGGA
TAGTTGCTGAGCGAATTCCATTATTTGTTTGGAGTGTTACTGTAACGGCTATTTTATTGG
TAGCTGCTTTGCCTGTGTTAGCTGGTGCTATTACTATGTTATTAACTGATCGTAATTTAA
ACACATCTTTCTTTGATCCTACTGGGGGAGGAGATCCAATTCTGTACATGCACTTGTTTT

>biv_401_3_Lamellidens_ferrugineus
GGACCTTGTATTTATTATTAGCATTGTGGTCTGGGTTGATTGGGTTAGCTTTGAGGCTTT
TGATTCGAGCTGAGTTAGGACAACCAGGTAGTTTGCTAGGGGATGATCAGTTATATAATG
TTATTGTAACAGCTCATGCATTTATGATAATTTTTTTCTTGGTGATGCCGATGATAATTG
GTGGGTTTGGAAATTGGTTGATTCCTTTGATGATTGGGGCTCCTGATATAGCTTTTCCTC
GATTGAATAATTTAAGGTTTTGATTGCTTGTACCTGCTTTGTTTTTGTTGTTGAGGTCTT
CTCTGGTGGAGAGGGGCGTTGGAACTGGTTGAACGGTTTATCCACCCTTGTCAGGAAATG
TGGCCCATTCTGGGGCTTCTGTTGATTTAGCTATTTTCTCTTTGCATCTTGCTGGTGCTT
CTTCTATTCTGGGGGCTATTAATTTTATCTCTACTGTGGGAAATATGCGGTCTCCGGGGA
TAGTTGCTGAGCGAATTCCATTATTTGTTTGGAGTGTTACTGTAACGGCTATTTTATTGG
TAGCTGCTTTGCCTGTGTTAGCTGGTGCTATTACTATGTTATTAACTGATCGTAATTTAA
ACACATCTTTCTTTGATCCTACTGGGGGAGGTGATCCAATTCTGTACATGCACTTGTTTT

>biv_406A_1_Lamellidens_ferrugineus
GGACCTTGTATTTATTATTAGCATTGTGGTCTGGGTTGATTGGGTTAGCTTTGAGGCTTT
TGATTCGAGCTGAGTTAGGACAACCAGGTAGTTTGCTAGGGGATGATCAGTTATATAATG
TTATTGTAACAGCTCATGCATTTATGATAATTTTTTTCTTGGTGATGCCAATGATAATTG
GTGGGTTTGGAAATTGGTTGATTCCTTTGATGATTGGGGCTCCTGATATAGCTTTTCCTC
GATTGAATAATTTAAGGTTTTGATTGCTTGTACCTGCTTTGTTTTTGTTGTTGAGGTCTT
CTCTGGTGGAGAGGGGCGTTGGAACTGGTTGAACGGTTTATCCACCCTTGTCAGGAAATG
TGGCCCATTCTGGGGCTTCTGTTGATTTAGCTATTTTCTCTTTGCATCTTGCTGGTGCTT
CTTCTATTCTGGGGGCTATTAATTTTATCTCTACTGTGGGAAATATGCGGTCTCCGGGGA
TAGTTGCTGAGCGAATTCCATTATTTGTTTGGAGTGTTACTGTAACGGCTATTTTATTGG
TAGCTGCTTTGCCTGTGTTAGCTGGTGCTATTACTATATTATTAACTGATCGTAATTTAA
ACACATCTTTCTTTGATCCTACTGGGGGAGGTGATCCAATTCTGTACATGCACTTGTTTT

>biv_406A_2_Lamellidens_ferrugineus
GGACCTTGTATTTATTATTAGCATTGTGGTCTGGGTTGATTGGGTTAGCTTTGAGGCTTT
TGATTCGAGCTGAGTTAGGACAACCAGGTAGTTTGCTAGGGGATGATCAGTTATATAATG
TTATTGTAACAGCTCATGCATTTATGATAATTTTTTTCTTGGTGATGCCAATGATAATTG
GTGGGTTTGGAAATTGGTTGATTCCTTTGATGATTGGGGCTCCTGATATAGCTTTTCCTC
GATTGAATAATTTAAGGTTTTGATTGCTTGTACCTGCTTTGTTTTTGTTGTTGAGGTCTT
CTCTGGTGGAGAGGGGCGTTGGAACTGGTTGAACGGTTTATCCACCCTTGTCAGGAAATG
TGGCCCATTCTGGGGCTTCTGTTGATTTAGCTATTTTCTCTTTGCATCTTGCTGGTGCTT
CTTCTATTCTGGGGGCTATTAACTTTATCTCTACTGTGGGAAATATGCGGTCTCCGGGGA
TAGTTGCTGAGCGAATTCCATTATTTGTTTGGAGTGTTACTGTAACGGCTATTTTATTGG
TAGCTGCTTTGCCTGTGTTAGCTGGTGCTATTACTATGTTATTAACTGATCGTAATTTAA
ACACATCTTTCTTTGATCCTACTGGGGGAGGTGATCCAATTCTGTACATGCACTTGTTTT

>biv_408A_1_Lamellidens_ferrugineus
GAACCTTGTATTTATTATTAGCATTGTGGTCTGGGTTGATTGGGTTAGCTTTGAGGCTTT
TGATTCGAGCTGAGTTAGGACAACCAGGTAGTTTGCTAGGGGATGATCAGTTATATAATG
TCATTGTAACAGCTCATGCATTTATAATAATTTTTTTCTTGGTGATGCCAATGATAATTG
GTGGGTTTGGAAATTGGTTGATTCCTTTGATGATTGGGGCTCCTGATATAGCTTTTCCTC
GATTGAATAATTTAAGGTTTTGATTGCTTGTACCTGCTTTGTTTTTGTTGTTGAGATCTT
CTCTGGTGGAGAGGGGCGTTGGAACTGGTTGAACAGTTTATCCGCCCTTGTCAGGAAATG
TGGCCCATTCTGGGGCTTCTGTTGATTTAGCTATTTTCTCTTTGCATCTTGCTGGTGCTT
CTTCTATTCTGGGGGCTATTAATTTTATCTCTACTGTGGGAAATATGCGGTCTCCGGGGA
TAGTTGCTGAGCGAATTCCATTATTTGTTTGGAGTGTTACTGTAACGGCTATTTTGTTGG
TAGCTGCTTTGCCTGTGTTAGCTGGTGCTATTACTATGTTATTAACTGATCGTAATTTAA
ACACATCTTTCTTTGATCCTACTGGGGGAGGTGATCCAATTCTGTACATGCACTTGTTTT

>biv_408A_2_Lamellidens_ferrugineus
GGACCTTGTATTTATTATTAGCGTTGTGGTCTGGGTTGATTGGGTTAGCTTTGAGGCTTT
TGATTCGAGCTGAGTTAGGACAACCAGGTAGTTTGCTAGGGGATGATCAGTTATATAATG
TTATTGTAACAGCTCATGCATTTATGATAATTTTTTTCTTGGTGATGCCAATGATAATTG
GTGGGTTTGGAAATTGGCTGATTCCTTTGATGATTGGGGCTCCTGATATAGCTTTTCCTC
GATTGAATAATTTAAGGTTTTGATTGCTTGTACCTGCTTTGTTTTTGTTGTTGAGGTCTT
CTCTGGTGGAGAGGGGCGTTGGAACTGGTTGAACGGTTTATCCACCCTTGTCAGGAAATG
TGGCCCATTCTGGGGCTTCTGTTGATTTAGCTATTTTCTCTTTGCATCTTGCTGGTGCTT
CTTCTATTCTGGGGGCTATTAATTTTATCTCTACTGTGGGAAATATGCGGTCTCCGGGGA
TAGTTGCTGAGCGAATTCCATTATTTGTTTGGAGTGTTACTGTAACGGCTATTTTATTGG
TAGCTGCTTTGCCTGTGTTAGCTGGTGCTATTACTATGTTATTAACTGATCGTAATTTAA
ACACATCTTTCTTTGATCCTACTGGGGGAGGTGATCCAATTCTGTACATGCACTTGTTTT

>biv_153_Lamellidens_mainwaringi
GAACTTTATATTTATTGCTAGCATTGTGGTCTGGATTGATTGGGTTAGCTCTGAGACTTT
TGATTCGAGCTGAGTTAGGGCAGCCAGGTAGTTTGTTAGGGGACGATCAGTTATATAATG
TTATTGTAACGGCTCATGCGTTTATAATAATTTTTTTCTTGGTGATGCCAATGATGATTG
GTGGGTTTGGAAATTGGCTGATTCCTTTGATGATTGGGGCTCCTGATATGGCTTTTCCTC
GATTAAATAATTTAAGGTTTTGATTGCTTGTACCTGCTTTATTTTTGTTGTTGAGATCTT
CTTTGGTGGAGAGGGGTGTTGGGACTGGTTGAACGGTTTATCCACCTTTGTCAGGAAATG
TAGCTCATTCTGGGGCTTCTGTTGATTTAGCTATTTTTTCTTTGCATCTTGCCGGTGCTT
CTTCCATTTTGGGGGCTATTAATTTTATTTCTACTGTGGGAAATATGCGATCTCCGGGTA
TAGTTGCTGAGCGAATTCCGTTATTTGTTTGGAGTGTTACTGTAACGGCTATTTTATTAG
TAGCTGCTTTGCCTGTGTTAGCTGGTGCTATTACTATGCTACTAACTGATCGTAATCTAA
ATACATCTTTTTTTGACCCTACTGGGGGAGGTGATCCAATTCTATATATACACTTGTTTT
