# Supplementary material for: Follow the Footsteps of Leonardo Fea: An Example of an Integrative Revision of Freshwater Mussel Taxa Described from the Former British Burma (Myanmar)
Source: Hindawi journal article supplement (doi:10.1155/2022/6600359), 2022-05-27
Supplement: f1 [file 6600359.f1.zip › Alignment S5.fasta]

>biv_294_1_Gonidea_angulata
GTACACTGTATTTGTTGTTGGCTTTGTGGTCTGGGTTAATTGGGTTAGCTTTGAGATTGT
TAATTCGGGCGGAGTTGGGACAACCTGGAAGATTATTAGGTGATGATCAACTTTATAATG
TAATTGTTACAGCACATGCTTTTATAATAATTTTCTTTTTGGTAATGCCAATAATAATTG
GTGGTTTTGGGAATTGGCTTATTCCTCTTATGATCGGGGCACCTGATATGGCTTTTCCTC
GTCTAAATAATTTAAGGTTTTGATTACTTGTACCGGCTCTTTTTTTATTATTAAGGTCTT
CATTAGTAGAGAGTGGTGTTGGGACTGGTTGGACAGTGTATCCGCCGTTGTCTGGGAATG
TTGCTCATTCTGGGGCTTCGGTTGACTTGGCTATTTTTTCTCTTCATCTTGCGGGTGCTT
CTTCTATTTTGGGTGCTATTAATTTTATTTCTACTGTGGGGAATATGCGTTCTCCTGGGT
TAGTTGCTGAGCGGATTCCTTTGTTTGTGTGGGCTGTGACTGTGACGGCAGTTTTATTGG
TTGCAGCATTACCTGTATTGGCTGGTGCTATTACGATATTACTTACTGATCGTAATCTTA
ATACATCGTTTTTTGATCCTACTGGTGGGGGGGATCCAATTCTGTATATACATTTATTTT

>biv_177_10_Potomida_littoralis
GTACTTTATACTTGTTGTTGGCTTTGTGGTCTGGGTTGATTGGGTTGGCTCTAAGGCTTT
TAATTCGAGCAGAGTTGGGGCAGCCTGGTAGGTTATTGGGGGATGATCAGTTGTATAATG
TTATTGTTACAGCACACGCTTTTATGATAATTTTCTTTTTGGTGATACCGATGATAATTG
GGGGTTTTGGAAATTGACTTATTCCGCTAATAATTGGGGCTCCTGACATGGCCTTTCCTC
GTTTGAATAATTTGAGGTTTTGGCTACTTGTGCCTGCTCTTTTTTTGTTGTTAAGGTCTT
CGTTAGTAGAGAGTGGTGTGGGGACTGGGTGAACAGTTTATCCTCCTTTGTCTGGAAATG
TTGCTCATTCCGGGGCTTCGGTAGACTTGGCTATTTTTTCGTTGCATTTGGCTGGTGCTT
CTTCTATTTTAGGTGCTATTAATTTTATTTCTACTGTTGGAAATATGCGGTCTCCTGGGG
TGGTTGCTGAGCGTATTCCGCTATTCGTATGGGCTGTGACGGTAACAGCGGTCTTGTTAG
TTGCGGCATTGCCTGTGTTGGCTGGGGCTATTACGATGCTCCTTACTGATCGTAATCTTA
ATACTTCATTTTTTGACCCAACTGGAGGGGGGGATCCTATCTTATATATACACTTGTTTT

>biv_177_7_Leguminaia_wheatleyi
GTACGTTGTATTTATTATTGGCTTTGTGGTCTGGGCTAATTGGGTTGGCTTTGAGGTTGT
TGATTCGGGCAGAATTGGGGCAGCCTGGGAGATTATTAGGGGATGATCAATTATATAATG
TTATTGTTACAGCACATGCTTTTATGATAATTTTCTTTCTCGTTATGCCAATGATAATTG
GTGGTTTTGGGAATTGACTTATTCCTCTTATGATCGGGGCACCTGATATGGCTTTTCCTC
GTTTGAATAATTTAAGGTTTTGATTGCTTGTGCCGGCTCTTTTTTTGCTATTAAGGTCTT
CTTTAGTAGAGAGTGGTGTTGGAACGGGTTGGACGGTATATCCCCCGTTGTCAAGAAATG
TGGCTCATTCTGGGGCTTCGGTCGATTTAGCTATTTTTTCACTTCACCTTGCGGGTGCTT
CATCTATTTTGGGTGCTATTAATTTTATTTCTACTGTGGGAAATATACGTTCTCCTGGGT
TAGTTGCTGAGCGGATTCCGTTGTTTGTGTGGGCTGTGACTGTAACAGCGGTTTTGCTGG
TTGCAGCATTACCTGTGTTGGCTGGTGCTATTACGATGTTACTTACTGATCGTAATTTAA
ACACATCGTTTTTTGATCCTACTGGAGGAGGGGATCCAATTTTGTATATGCATTTGTTTT

>biv_200_1_Lamprotula_leai
GGACGTTGTATTTGTTGTTGGCTTTGTGGTCTGGGTTGATTGGGTTGGCTTTGAGGCTTT
TGATTCGGGCAGAGTTAGGGCAACCTGGTAGATTGTTGGGGGATGATCAGTTGTATAATG
TTATTGTTACGGCGCATGCTTTTATAATAATTTTCTTTTTGGTTATACCAATGATAATTG
GTGGTTTTGGGAATTGGCTTATTCCACTAATGATTGGGGCTCCTGATATGGCTTTTCCGC
GGTTAAATAATTTGAGGTTTTGGTTGCTTGTTCCGGCTCTTTTTTTGTTATTGAGGTCTT
CGTTGGTAGAGAGCGGTGTGGGGACTGGGTGGACGGTTTATCCGCCCTTGTCTGGGAATG
TTGCTCATTCTGGGGCTTCAGTAGATTTGGCTATTTTTTCGTTACATTTGGCTGGTGCTT
CTTCTATTTTGGGTGCTATTAATTTTATTTCTACTGTGGGGAATATGCGGTCTCCTGGCG
TAGTGGCTGAGCGTATTCCGTTGTTTGTGTGGGCTGTGACGGTAACAGCAATTTTGTTGG
TTGCAGCATTGCCTGTATTGGCGGGAGCGATTACTATGTTGCTTACTGATCGTAATATTA
ATACTTCGTTTTTTGATCCAACTGGTGGAGGTGATCCCATTTTGTATATACACCTGTTTT

>2012_0443_Trapezoideus_foliaceus
NNNNACTATATTTATTATTTGCTTTGTGATCTGGATTAATTGGGTTGGCTTTGAGTCTTT
TAATTCGGGCGGAGTTAGGGCAACCGGGAAGACTACTTGGGGATGATCAACTTTATAACG
TAATTGTAACTGCTCATGCTTTTATGATAATTTTTTTCTTGGTTATGCCCATAATAATTG
GAGGTTTTGGTAATTGGTTGATTCCTTTGATAATTGGGGCGCCTGATATGGCTTTTCCTC
GGTTAAATAATTTGAGGTTTTGGTTGCTTGTGCCGGCTCTTTTTTTGTTATTAAGGTCTT
CTCTTGTAGAGAGTGGAGTTGGGACTGGTTGAACTGTGTACCCTCCTTTGTCGGGTAATG
TGGCTCATTCTGGTGCTTCGGTGGATTTAGCTATTTTTTCGCTGCATCTTGCCGGTGCTT
CTTCTATTTTAGGGGCTATTAATTTTATTTCTACTGTAGGAAATATGCGTTCTCCTGGGT
TGGTTGCTGAGCGAATTCCTTTATTTGTGTGGGCTGTAACTGTGACAGCGATTTTGTTAG
TAGCTGCGTTGCCTGTGTTGGCTGGGGCTATTACGATGTTACTTACTGATCGTAATTTAA
ATACGTCCTTCTTTGATCCTACTGGTGGGGGAGATCCTATTTTATACATACACTTGTTNN

>2012_0445_Trapezoideus_foliaceus
NNNNACTATATTTATTATTTGCTTTGTGATCTGGATTAATTGGGTTGGCTTTGAGTCTTT
TAATTCGGGCGGAGTTAGGGCAACCGGGAAGACTACTTGGGGATGATCAACTTTATAACG
TAATTGTAACTGCTCATGCTTTTATGATAATTTTTTTCTTGGTTATGCCCATAATAATTG
GAGGTTTTGGTAATTGGTTGATTCCTTTGATAATTGGGGCGCCTGATATGGCTTTTCCTC
GGTTAAATAATTTGAGGTTTTGGTTGCTTGTGCCGGCTCTTTTTTTGTTATTAAGGTCTT
CTCTTGTAGAGAGTGGAGTTGGGACTGGTTGAACTGTGTACCCTCCTTTGTCGGGTAATG
TGGCTCATTCTGGTGCTTCGGTGGATTTAGCTATTTTTTCGCTGCATCTTGCCGGTGCTT
CTTCTATTTTAGGGGCTATTAATTTTATTTCTACTGTAGGAAATATGCGTTCTCCTGGGT
TGGTTGCTGAGCGAATTCCTTTATTTGTGTGGGCTGTAACTGTGACAGCGATTTTGTTAG
TAGCTGCGTTGCCTGTGTTGGCTGGGGCTATTACGATGTTACTTACTGATCGTAATTTAA
ATACGTCCTTCTTTGATCCTACTGGTGGGGGAGATCCTATTTTATACATACACTTGNNNN

>2012_0457_Trapezoideus_foliaceus
NNNNACTATATTTATTATTTGCTTTGTGATCTGGATTAATTGGGTTGGCTTTGAGTCTTT
TAATTCGGGCGGAGTTAGGGCAACCGGGAAGACTACTTGGGGATGATCAACTTTATAACG
TAATTGTAACTGCTCATGCTTTTATGATAATTTTTTTCTTGGTTATGCCCATAATAATTG
GAGGTTTTGGTAATTGGTTGATTCCTTTGATAATTGGGGCGCCTGATATGGCTTTTCCTC
GGTTAAATAATTTGAGGTTTTGGTTGCTTGTGCCGGCTCTTTTTTTGTTATTAAGGTCTT
CTCTTGTAGAGAGTGGAGTTGGGACTGGTTGAACTGTGTACCCTCCTTTGTCGGGTAATG
TGGCTCATTCTGGTGCTTCGGTGGATTTAGCTATTTTTTCGCTGCATCTTGCCGGTGCTT
CTTCTATTTTAGGGGCTATTAATTTTATTTCTACTGTAGGAAATATGCGTTCTCCTGGGT
TGGTTGCTGAGCGAATTCCTTTATTTGTGTGGGCTGTAACTGTGACAGCGATTTTGTTAG
TAGCTGCGTTGCCTGTGTTGGCTGGGGCTATTACGATGTTACTTACTGATCGTAATTTAA
ATACGTCCTTCTTTGATCCTACTGGTGGGGGAGATCCTATTTTATACATANNNNNNNNNN

>biv_629_1_Trapezoideus_lenya
GTACATTATATTTGTTATTTGCTTTGTGATCTGGGTTGATTGGGTTGGCTTTGAGTCTTT
TAATTCGGGCGGAGTTAGGGCAACCAGGAAGGTTACTCGGGGATGATCAACTTTATAACG
TAATTGTAACTGCTCATGCTTTTATGATAATTTTTTTCTTGGTTATGCCTATAATAATTG
GAGGTTTTGGTAATTGGTTGATTCCTTTAATAATTGGGGCGCCTGATATGGCTTTTCCTC
GGTTAAATAATTTGAGGTTTTGGTTGCTTGTGCCGGCTCTTTTTTTGTTATTAAGGTCTT
CTCTTGTAGAGAGTGGGGTTGGGACTGGTTGAACTGTGTACCCTCCTTTGTCTGGTAATG
TGGCGCATTCTGGTGCTTCGGTTGATTTAGCCATTTTTTCATTACATCTTGCTGGTGCTT
CTTCTATTTTAGGGGCTATTAATTTTATTTCTACTGTAGGGAATATGCGTTCTCCTGGAT
TGGTTGCTGAGCGAATTCCTTTATTTGTGTGGGCTGTAACTGTGACGGCGATTTTGTTAG
TAGCTGCGTTGCCTGTATTGGCTGGGGCTATTACGATGTTACTCACTGATCGTAATTTGA
ATACGTCTTTCTTTGACCCTACTGGTGGAGGAGATCCTATTTTATATATACACCTGTTTT

>biv_1021_1_Trapezoideus_mitanensis
GTACATTGTATTTGTTATTTGCTTTGTGATCTGGGTTGATTGGGTTGGCTTTGAGTCTTT
TAATTCGAGCTGAGTTAGGGCAACCAGGAAGGTTACTTGGGGATGACCAACTTTATAATG
TAATTGTGACTGCTCATGCTTTTATGATGATTTTTTTCTTGGTTATGCCTATAATAATTG
GGGGTTTTGGTAACTGGTTAATTCCTTTAATAATTGGGGCGCCTGATATAGCTTTTCCTC
GGTTAAATAATTTGAGATTTTGGTTACTTGTACCGGCTCTTTTTTTGTTATTAAGGTCTT
CTCTTGTAGAAAGTGGGGTTGGAACTGGTTGAACTGTGTACCCTCCTTTGTCAGGTAATG
TGGCGCATTCTGGTGCTTCGGTAGATTTGGCTATTTTTTCATTACATCTTGCTGGTGCTT
CTTCTATTCTAGGGGCTATTAATTTTATTTCTACTGTAGGAAATATGCGTTCTCCTGGGT
TGGTTGCTGAGCGAATTCCTTTATTTGTGTGGGCTGTAACTGTGACAGCGATTTTGTTAG
TAGCTGCGTTGCCTGTGTTGGCTGGGGCTATTACTATGCTACTTACTGATCGCAATTTAA
ATACGTCTTTCTTTGATCCTACTGGTGGGGGAGATCCTATTTTGTATATACACTTGTTTT

>biv_1021_2_Trapezoideus_mitanensis
GTACATTGTATTTGTTATTTGCTTTGTGATCTGGGTTGATTGGGTTGGCTTTGAGTCTTT
TAATTCGAGCTGAGTTAGGGCAACCAGGAAGGTTACTTGGGGATGACCAACTTTATAATG
TAATTGTGACTGCTCATGCTTTTATGATGATTTTTTTCTTGGTTATGCCTATAATAATTG
GGGGTTTTGGTAACTGGTTAATTCCTTTAATAATTGGGGCGCCTGATATAGCTTTTCCTC
GGTTAAATAATTTGAGATTTTGGTTACTTGTACCGGCTCTTTTTTTGTTATTAAGGTCTT
CTCTTGTAGAAAGTGGGGTTGGAACTGGTTGAACTGTGTATCCTCCTTTGTCAGGTAATG
TGGCGCATTCTGGTGCTTCGGTAGATTTGGCTATTTTTTCATTACATCTTGCTGGTGCTT
CTTCTATTCTAGGGGCTATTAATTTTATTTCTACTGTAGGAAATATGCGTTCTCCTGGGT
TGGTTGCTGAGCGAATTCCTTTATTTGTGTGGGCTGTAACTGTGACAGCGATTTTGTTAG
TAGCTGCGTTGCCTGTGTTGGCTGGGGCTATTACTATGCTACTTACTGATCGCAATTTAA
ATACGTCTTTCTTTGATCCTACTGGTGGGGGAGATCCTATTTTGTATATACACTTGTTTT

>2014_0614_Lens_pallegoixi
NNNNGTTGTATTTATTATTTGCTTTGTGGTCTGGGTTGATTGGGTTGGCTTTGAGTCTTT
TGATTCGGGCTGAATTGGGGCAACCTGGGAGATTACTTGGGGATGATCAGCTTTATAATG
TGATTGTAACTGCTCATGCTTTTATGATAATTTTTTTCTTAGTAATACCAATAATGATTG
GGGGTTTTGGTAATTGGTTAATTCCATTGATGATTGGGGCACCTGATATAGCTTTTCCTC
GGTTGAATAATTTGAGGTTTTGGTTACTTGTGCCGGCTTTATTTTTATTATTGAGGTCTT
CTCTTGTGGAGAGTGGGGTTGGGACAGGTTGGACTGTATATCCTCCTTTGTCAGGCAATG
TGGCTCATTCTGGTGCTTCGGTAGATTTAGCTATTTTTTCTTTGCATCTTGCTGGTGCTT
CTTCAATTTTGGGGGCTATTAACTTTATTTCCACTGTAGGAAATATGCGTTCTCCTGGGT
TGGTTGCTGAGCGAATTCCTTTATTTGTGTGGGCTGTTACTGTGACAGCGATTTTGTTGG
TTGCTGCGTTGCCTGTGTTAGCTGGGGCTATTACGATGTTACTTACGGATCGTAATTTAA
ATACGTCTTTTTTTGACCCTACTGGGGGGGGAGATCCTATTTTATATATGCATTTATTTN

>2014_0685_Lens_missellus
NNNNGCTGTATTTATTATTTGCTTTGTGGTCTGGATTGATTGGGTTGGCTTTGAGTCTTT
TAATTCGGGCGGAGTTGGGGCAACCTGGGAGATTACTTGGGGATGATCAGCTTTATAATG
TGATTGTAACTGCTCATGCTTTTATGATGATTTTTTTCTTGGTAATGCCAATAATAATTG
GGGGTTTTGGTAATTGGTTGATTCCTTTAATAATTGGGGCACCTGATATGGCTTTTCCTC
GGCTAAATAACTTGAGGTTTTGGTTACTTGTGCCGGCTCTTTTTTTATTGTTGAGGTCTT
CTCTTGTAGAGAGGGGGGTTGGGACAGGTTGGACTGTGTACCCTCCTTTGTCAGGCAATG
TAGCTCATTCTGGTGCTTCAGTAGACTTAGCTATTTTTTCTTTACATCTTGCTGGTGCTT
CTTCAATTTTGGGGGCTATTAATTTTATTTCTACTGTAGGAAATATGCGTTCTCCTGGGT
TGGTTGCTGAGCGGATTCCTTTATTTGTGTGGGCTGTTACGGTAACAGCGATTTTGTTGG
TCGCTGCATTGCCTGTGTTAGCAGGGGCTATTACAATATTACTTACGGACCGTAATTTGA
ATACATCTTTTTTTGACCCTACTGGGGGGGGAGATCCTATTTTGTACATACACTTNNNNN

>biv_182_3_Lens_comptus
GTACGTTATACTTGTTATTTGCTTTGTGATCTGGGTTGATTGGGTTGGCTTTAAGTCTTT
TAATTCGGGCGGAATTGGGACAACCTGGGAGATTACTTGGGGATGATCAGCTTTATAATG
TGATTGTAACTGCTCATGCTTTTATGATGATTTTTTTCTTAGTTATACCAATAATGATTG
GGGGTTTTGGTAATTGGTTAATCCCATTGATGATTGGGGCACCTGATATAGCTTTTCCTC
GGCTGAATAATTTGAGGTTTTGGCTACTTGTGCCGGCTCTTTTTTTATTGTTGAGGTCTT
CCCTTGTGGAGAGCGGGGTTGGAACGGGTTGGACTGTATACCCCCCTTTGTCAGGCAATG
TGGCCCATTCTGGTGCTTCGGTAGATTTAGCTATTTTTTCTTTGCATCTTGCTGGTGCCT
CTTCAATTTTGGGGGCTATTAACTTTATTTCTACTGTAGGAAATATGCGTTCTCCTGGGT
TGGTTGCTGAGCGAATTCCTTTATTTGTGTGGGCTGTTACTGTGACAGCGATTTTGTTGG
TTGCTGCGCTGCCTGTGTTAGCTGGGGCCATTACAATACTACTCACAGATCGTAACTTGA
ACACGTCTTTTTTTGACCCTACTGGGGGGGGAGACCCTATTTTGTATATGCACTTATTTT

>biv_127_1_Lens_eximius
GTACGTTATATTTATTATTTGCTTTGTGGTCTGGATTGATTGGGTTGGCTTTGAGGCTTT
TGATTCGGGCGGAGTTAGGGCAACCTGGGAGATTACTTGGGGATGATCAACTCTATAATG
TAATTGTGACTGCTCATGCTTTTATGATGATTTTTTTCTTAGTAATGCCAATGATGATTG
GGGGTTTTGGTAATTGGTTAATTCCCTTAATAATTGGGGCACCGGATATGGCTTTTCCTC
GGTTAAATAATTTAAGGTTTTGATTACTTGTGCCAGCTCTGTTTTTATTATTGAGGTCTT
CTCTTGTGGAAAGTGGGGTCGGGACGGGTTGGACTGTGTATCCCCCTTTGTCAGGCAATG
TAGCTCATTCTGGTGCTTCGGTAGACTTAGCTATTTTTTCCTTACACCTTGCTGGTGCTT
CTTCAATTTTGGGTGCTATTAATTTTATTTCTACTGTGGGGAATATGCGTTCTCCTGGGT
TGGTTGCTGAGCGAATTCCATTGTTTGTGTGGGCTGTTACTGTGACAGCGATTTTATTGG
TTGCTGCGTTGCCTGTGTTAGCTGGAGCTATTACGATGTTGCTTACTGATCGTAATTTGA
ATACGTCATTTTTTGATCCTACTGGGGGAGGAGACCCTATTTTGTATATGCATTTGTTTT

>biv_202_2_Lens_novoselovi
GTACGCTATATTTGTTGTTTGCTTTGTGATCTGGGTTGATTGGGTTGGCTTTAAGTCTTT
TGATTCGGGCGGAATTGGGACAACCTGGGAGATTACTTGGGGATGATCAGCTTTATAATG
TTATTGTAACTGCTCATGCTTTTATGATGATTTTTTTCTTAGTCATACCAATGATGATTG
GGGGCTTTGGTAATTGGTTAATCCCATTGATGATTGGGGCACCTGATATGGCTTTTCCTC
GGCTGAATAATTTGAGATTTTGGCTACTTGTGCCGGCTCTTTTTTTATTATTGAGGTCTT
CCCTTGTGGAGAGCGGGGTTGGGACAGGTTGGACTGTCTATCCCCCTTTGTCAGGCAATG
TGGCTCATTCTGGTGCTTCGGTAGATTTAGCTATTTTTTCTTTGCATCTTGCTGGTGCTT
CTTCAATTTTGGGAGCTATTAACTTTATTTCTACTGTAGGAAATATGCGTTCTCCTGGGT
TGGTTGCTGAGCGAATTCCTTTATTTGTGTGGGCTGTTACTGTGACAGCGATTTTGTTGG
TTGCTGCATTGCCTGTGTTAGCTGGGGCCATTACAATACTCCTTACAGATCGTAATTTGA
ACACGTCTTTTTTTGACCCTACTGGGGGGGGAGACCCTATTTTATATATGCACTTATTTT

>biv_211_2_Lens_contradens
GTACGTTATATTTGTTGTTTGCTTTATGGTCTGGATTGATTGGGTTGGCTTTAAGCCTTT
TGATTCGGGCGGAGTTGGGTCAACCTGGGAGATTGCTTGGGGATGATCAACTATACAATG
TAATTGTAACTGCTCATGCTTTTATAATGATTTTTTTCTTGGTAATACCTATAATAATTG
GGGGTTTTGGTAATTGGTTGATTCCCTTAATGATTGGGGCACCTGATATGGCTTTCCCTC
GGCTTAACAATTTAAGGTTTTGATTACTTGTGCCGGCTCTTTTTTTATTATTAAGGTCTT
CTCTTGTGGAGAGTGGGGTTGGGACAGGTTGGACTGTGTACCCTCCTTTGTCAGGCAATG
TAGCTCATTCTGGTGCTTCGGTAGACTTAGCTATCTTTTCTTTACATCTTGCTGGTGCTT
CTTCCATTTTGGGGGCTATTAATTTTATTTCTACTGTTGGGAATATGCGTTCTCCTGGGT
TGGTTGCTGAGCGAATTCCTTTGTTTGTATGGGCTGTTACAGTAACAGCAATTTTGTTGG
TTGCTGCATTGCCTGTATTGGCTGGGGCTATTACAATGTTACTTACGGATCGTAATTTGA
ATACATCTTTTTTTGACCCTACTGGGGGNNNNNNNNNNNNNNNNNNNNNNNNNNNNNNNN

>KP795034_Lens_micropterus
NNNCGTTATATTTGTTATTTGCTTTATGGTCTGGATTGATTGGGTTGGCTTTAAGCCTTT
TGATTCGGGCGGAGTTGGGTCAACCTGGGAGGTTGCTTGGGGATGATCAACTCTATAATG
TAATTGTAACTGCTCATGCTTTTATAATGATTTTTTTCTTGGTAATACCCATAATAATTG
GGGGTTTTGGTAATTGGTTGATTCCTCTAATGATTGGGGCACCTGATATGGCTTTCCCTC
GGCTTAACAATTTAAGGTTTTGACTCCTTGTGCCGGCTCTTTTTTTATTGTTGAGGTCTT
CTCTTGTGGAGAGTGGGGTTGGGACAGGCTGGACTGTGTATCCTCCTTTGTCAGGCAATG
TAGCTCATTCTGGTGCTTCGGTAGACTTAGCCATTTTTTCTTTGCATCTTGCTGGTGCTT
CTTCCATTTTGGGGGCTATTAATTTTATTTCTACTGTTGGAAATATGCGTTCTCCTGGGT
TGGTTGCTGAGCGAATTCCTTTGTTTGTATGGGCTGTTACTGTGACAGCAATTTTGTTGG
TTGCTGCGTTGCCTGTATTGGCCGGGGCTATTACAATGTTACTTACGGATCGTAATTTGA
ATACGTCTTTTTTTGACCCTACTGGGGNNNNNNNNNNNNNNNNNNNNNNNNNNNNNNNNN

>MG582018_Lens_rolfbrandti
NNACGCTATATTTGTTATTTGCTTTGTGGTCTGGATTGATTGGGTTGGCTTTGAGGCTTT
TGATTCGGGCGGAGTTAGGGCAACCTGGGAGATTGCTTGGAGATGATCAGCTCTATAATG
TGATTGTAACTGCCCATGCTTTTATGATGATTTTTTTCTTAGTAATACCAATGATGATTG
GGGGTTTTGGTAATTGGTTAATTCCCTTAATAATTGGTGCACCTGATATGGCTTTTCCTC
GGTTAAATAATCTAAGGTTTTGATTACTTGTGCCAGCTCTATTTTTATTGCTGAGGTCCT
CTCTTGTGGAAAGTGGGGTTGGGACGGGTTGGACTGTGTACCCCCCTTTGTCAGGCAATG
TAGCTCATTCTGGTGCTTCGGTAGATTTAGCTATTTTCTCCTTACACCTTGCTGGTGCTT
CTTCAATTTTGGGTGCTATTAATTTTATTTCTACTGTGGGGAATATGCGTTCTCCTGGGT
TGGTTGCTGAGCGAATTCCATTATTTGTGTGGGCTGTTACTGTGACAGCGATTTTGTTGG
TTGCTGCGTTGCCTGTGTTAGCTGGAGCTATTACGATGTTGCTTACTGATCGTAATTTGA
ATACGTCATTTTTTGATCCTACTGGGGGAGGGGACCCCATTTTGTACATGCATTTGTTTT

>MG582015_Lens_maenamensis
NNACTTTATACTTGTTATTTGCTTTGTGGTCTGGGCTGATTGGGTTGGCTTTGAGGCTTT
TGATTCGGGCGGAGTTAGGGCAACCTGGAAGGTTACTTGGGGATGATCAACTTTATAATG
TGATTGTTACTGCTCATGCTTTTATAATAATTTTTTTCTTAGTAATGCCAATGATGATTG
GGGGTTTTGGTAATTGGTTAATTCCTTTGATGATTGGGGCACCTGATATGGCTTTTCCTC
GGTTAAATAATTTGAGGTTTTGGTTACTTGTGCCAGCTCTTTTTTTATTATTGAGGTCTT
CTCTTGTGGAGAGAGGGGTCGGAACAGGTTGGACTGTGTACCCTCCTTTGTCAGGTAATG
TAGCTCATTCTGGTGCTTCGGTGGACTTAGCTATTTTTTCTTTACATCTTGCTGGTGCTT
CTTCAATTTTGGGTGCTATTAATTTTATTTCTACTGTGGGAAATATGCGTTCTCCTGGGT
TGGTTGCTGAGCGAATTCCTTTGTTTGTGTGGGCTGTTACTGTGACAGCAATTTTGTTGG
TTGCTGCATTGCCTGTGTTAGCTGGAGCTATTACAATGTTGCTTACGGATCGTAATTTGA
ATACGTCTTTTTTTGACCCTACTGGGGGGGGAGATCCTATTTTATACATGCATTTGTTTT

>biv_125_2_Physunio_modelli
GTACATTATATTTATTATTCGCTTTGTGGTCTGGGTTGATTGGGTTGGCTTTAAGTCTTT
TAATCCGGGCGGAGTTGGGTCAACCTGGAAGGTTGCTTGGGGATGATCAGTTATATAATG
TGATTGTGACGGCTCATGCTTTTATAATAATTTTTTTCTTGGTGATGCCTATGATAATTG
GCGGTTTTGGTAATTGGTTGATTCCCTTAATAATTGGAGCACCTGATATGGCTTTTCCTC
GATTGAATAATTTGAGATTTTGGTTACTTGTACCTGCTCTTTTTTTATTATTAAGGTCTT
CTCTTGTGGAAAGTGGGGTTGGGACAGGCTGGACTGTGTACCCTCCGTTGTCAGGTAATG
TGGCACATTCTGGTGCTTCGGTAGACTTGGCTATTTTCTCATTACATCTTGCTGGTGCTT
CTTCTATTTTAGGGGCTATTAATTTCATTTCTACGGTTGGGAATATGCGTTCTCCTGGAT
TAGTTGCTGAGCGAATTCCTTTGTTTGTATGGGCTGTGACTGTAACAGCTATTTTGTTGG
TTGCTGCGTTGCCTGTGTTAGCTGGTGCTATTACGATGCTACTAACAGATCGTAATTTAA
ATACGTCTTTTTTTGACCCTACGGGAGGGGGCGATCCGATTTTATACATGCATTTGTTTT

>BIV1776_Physunio_superbus
NTACCTTGTATTTATTATTTGCTTTGTGGTCTGGGTTGATTGGGTTGGCTTTAAGTCTTT
TAATTCGAGCAGAGTTAGGGCAGCCAGGGAGATTACTTGGGGATGATCAGCTTTATAACG
TAATTGTGACTGCTCATGCTTTTATAATAATTTTTTTCTTAGTAATGCCTATAATAATTG
GGGGTTTTGGAAATTGATTGATTCCGTTAATGATTGGGGCGCCTGATATGGCTTTTCCTC
GATTAAATAATTTGAGGTTTTGGTTGCTTGTGCCTGCTCTTTTTTTGTTGTTGAGGTCTT
CTCTTGTGGAGAGCGGGGTTGGGACAGGTTGGACTGTGTACCCTCCGTTATCAAATAATG
TGGCTCATTCTGGTGCTTCGGTGGATTTGGCTATTTTTTCATTGCACCTTGCTGGTGCTT
CTTCTATTTTAGGGGCTATTAACTTTATTTCTACGGTGGGGAATATGCGTTCTCCTGGGT
TGGTAGCTGAACGGATTCCTTTGTTTGTGTGAGCTGTGACTGTAACAGCTGTTTTGTTGG
TGGCTGCTTTGCCTGTATTAGCTGGTGCTATTACGATGTTACTTACGGACCGTAATTTAA
ATACGTCTTTTTTTGACCCTACTGGGGGAGGAGACCCAATTTTGTATATACATTTGTGTN

>ICH_00638_Yaukthwa_paiensis
NNNNTTTATATTTATTGTTTGCTTTATGGTCTGGATTGATTGGGTTAGCTTTGAGGCTTT
TGATTCGGGCTGAATTAGGGCAACCTGGAAGGTTGCTTGGTGATGATCAGCTTTATAATG
TGATTGTGACTGCTCATGCTTTTATGATGATTTTTTTCTTGGTAATGCCTATAATAATTG
GGGGTTTCGGTAATTGATTAATTCCGTTAATGATTGGGGCACCTGATATGGCTTTCCCTC
GCTTAAATAATTTGAGGTTTTGGTTACTTGTGCCGGCTCTTTTTTTGTTGTTGAGATCCT
CGCTTGTAGAGAGTGGAGTTGGAACAGGTTGGACTGTGTATCCACCTTTGTCAGGTAATG
TAGCTCATTCTGGTGCTTCGGTGGATTTGGCTATTTTTTCTTTACATCTTGCTGGTGCTT
CTTCTATTCTAGGAGCTATTAATTTTATTTCTACTGTAGGTAATATGCGTTCTCCTGGGT
TAGTTGCTGAGCGAATTCCTTTATTTGTGTGGGCTGTTACGGTAACAGCCATTTTGTTAG
TGGCTGCGTTACCTGTGTTAGCTGGGGCTATTACTATGCTACTTACTGATCGTAATTTAA
ATACGTCTTTTTTTGATCCTACTGGGGGTGGAGATCCAATTTTGTATATACATTTGTTTN

>biv_144_14_Yaukthwa_nesemanni
GTACGTTATACTTAGTGTTTGCTTTGTGGTCTGGATTGATTGGATTAGCTTTGAGTCTTT
TGATTCGTGCTGAGTTAGGGCAGCCTGGAAGGTTGCTTGGTGACGATCAGCTTTATAATG
TGATTGTGACTGCTCATGCTTTTATAATGATTTTCTTTTTGGTAATGCCTATGATGATTG
GGGGTTTTGGTAATTGGTTGATTCCGCTAATGATTGGGGCACCTGATATGGCTTTTCCTC
GATTAAATAATTTGAGGTTTTGGTTACTTGTGCCGGCTCTTTTTTTGTTGTTGAGGTCTT
CACTTGTAGAGAGTGGGGTTGGAACAGGTTGGACTGTGTATCCGCCTTTATCAGGTAATG
TAGCTCATTCTGGTGCCTCGGTGGATTTGGCTATTTTTTCTTTACATCTTGCTGGTGCTT
CTTCCATTTTGGGGGCTATTAATTTTATTTCTACTGTAGGGAATATGCGCTCTCCTGGGT
TAGTCGCTGAGCGAATTCCTTTGTTTGTGTGGGCTGTTACGGTAACAGCTATTTTGTTAG
TGGCTGCGTTGCCTGTATTGGCTGGTGCTATTACTATGTTGCTTACTGATCGTAATTTGA
ATACGTCTTTTTTTGACCCTACTGGTGGGGGAGATCCAATTTTATATATGCATTTATTTT

>biv_144_19_Yaukthwa_nesemanni
GTACGTTATACTTAGTGTTTGCTTTGTGGTCTGGATTGATTGGATTAGCTTTGAGTCTTT
TGATTCGTGCTGAGTTAGGGCAGCCTGGAAGGTTGCTTGGTGACGATCAGCTTTATAATG
TGATTGTGACTGCTCATGCTTTTATAATGATTTTCTTTTTGGTAATGCCTATGATGATTG
GGGGTTTCGGTAATTGGTTGATTCCGCTAATGATTGGGGCACCTGATATGGCTTTTCCTC
GATTAAATAATTTGAGGTTTTGGTTGCTTGTGCCGGCTCTTTTTTTGTTGTTGAGGTCTT
CACTTGTAGAGAGTGGGGTTGGAACAGGTTGGACTGTGTATCCACCTTTATCAGGTAATG
TGGCTCATTCTGGTGCCTCGGTGGATTTGGCTATTTTTTCTTTACATCTTGCTGGTGCTT
CTTCCATTTTGGGGGCTATTAATTTTATCTCTACTGTAGGGAATATGCGCTCTCCTGGGT
TAGTCGCTGAGCGAATTCCTTTGTTTGTGTGGGCTGTTACGGTAACAGCTATTTTGTTAG
TGGCTGCGTTGCCTGTATTGGCTGGTGCTATTACTATGTTGCTTACTGATCGTAATCTGA
ATACGTCTTTTTTTGACCCTACTGGTGGGGGAGATCCAATTTTATATATGCATTTATTTT

>biv_255_2_Yaukthwa_nesemanni
GTACGTTATACTTAGTGTTTGCTTTGTGGTCTGGATTGATTGGATTAGCTTTGAGTCTTT
TGATTCGTGCTGAGTTAGGGCAGCCTGGAAGGTTGCTTGGTGACGATCAGCTTTATAATG
TGATTGTGACTGCTCATGCTTTTATAATGATTTTCTTTTTGGTAATGCCTATGATGATTG
GGGGTTTCGGTAATTGGTTGATTCCGCTAATGATTGGGGCACCTGATATGGCTTTTCCTC
GATTAAATAATTTGAGGTTTTGGTTGCTTGTGCCGGCTCTTTTTTTGTTGTTGAGGTCTT
CACTTGTAGAGAGTGGGGTTGGAACAGGTTGGACTGTGTATCCGCCTTTATCAGGTAATG
TGGCTCATTCTGGTGCCTCGGTGGATTTGGCTATTTTTTCTTTACATCTTGCTGGTGCTT
CTTCCATTTTGGGGGCTATTAATTTTATCTCTACTGTAGGGAATATGCGCTCTCCTGGGT
TAGTCGCTGAGCGAATTCCTTTGTTTGTGTGGGCTGTTACGGTAACAGCTATTTTGTTAG
TGGCTGCGTTGCCTGTATTGGCTGGTGCTATTACTATGTTGCTTACTGATCGTAATCTGA
ATACGTCTTTTTTTGACCCTACTGGTGGGGGAGATCCAATTTTATATATGCATTTATTTT

>biv_607_1_Yaukthwa_nesemanni
GTACGTTATACTTAGTGTTTGCTTTGTGGTCTGGATTGATTGGATTAGCTTTGAGCCTTT
TGATTCGTGCTGAGTTAGGGCAGCCTGGAAGGTTGCTTGGTGACGATCAGCTTTATAATG
TGATTGTGACTGCTCATGCTTTTATAATGATTTTCTTTTTGGTAATGCCTATGATGATTG
GGGGTTTTGGTAATTGGTTGATTCCACTAATGATTGGGGCACCTGATATGGCTTTTCCTC
GATTAAATAATTTGAGGTTTTGGTTGCTTGTGCCGGCCCTTTTTTTGTTGTTGAGGTCTT
CACTTGTAGAGAGTGGGGTTGGAACAGGTTGGACTGTGTATCCGCCTTTATCAGGTAATG
TGGCTCATTCTGGTGCTTCGGTGGATTTGGCTATTTTTTCTTTACATCTTGCTGGTGCTT
CTTCCATTTTGGGGGCTATTAATTTTATTTCTACTGTAGGGAATATGCGCTCTCCTGGGT
TAGTTGCTGAGCGAATTCCTTTGTTTGTGTGGGCTGTTACGGTAACAGCTATTTTGTTAG
TAGCTGCGTTGCCTGTATTGGCTGGTGCTATTACTATGTTGCTTACTGATCGTAATCTGA
ATACGTCTTTTTTTGATCCTACTGGTGGGGGAGATCCGATTTTATACATGCATTTATTTT

>biv_607_2_Yaukthwa_nesemanni
GTACGTTATATTTAGTGTTTGCTTTGTGGTCTGGATTGATTGGATTAGCTTTGAGCCTTT
TGATTCGTGCTGAGTTAGGGCAGCCTGGAAGGTTGCTTGGTGACGATCAGCTTTATAATG
TGATTGTGACTGCTCATGCTTTTATAATGATTTTCTTTTTGGTAATGCCTATGATGATTG
GGGGTTTTGGTAATTGGTTGATTCCACTAATGATTGGGGCACCTGATATGGCTTTTCCTC
GATTAAATAATTTGAGGTTTTGGTTGCTTGTGCCGGCTCTTTTTTTGTTGTTGAGGTCTT
CACTTGTAGAGAGTGGGGTTGGAACAGGTTGGACTGTGTATCCGCCTTTATCAGGTAATG
TGGCTCATTCTGGTGCTTCGGTGGATTTGGCTATTTTTTCTTTACATCTTGCTGGTGCTT
CTTCCATTTTGGGGGCTATTAATTTTATTTCTACTGTAGGGAATATGCGCTCTCCTGGGT
TAGTTGCTGAGCGAATTCCTTTGTTTGTATGGGCTGTTACGGTAACAGCTATTTTGTTAG
TAGCTGCGTTGCCTGTATTGGCTGGTGCTATTACTATGTTGCTTACTGATCGTAATCTGA
ATACGTCTTTTTTTGATCCTACTGGTGGGGGAGATCCGATTTTATACATGCATTTATTTT

>biv_608_1_Yaukthwa_nesemanni
GTACGTTATACTTAGTGTTTGCTTTGTGGTCTGGATTGATTGGATTAGCTTTGAGCCTTT
TGATTCGTGCTGAGTTAGGGCAGCCTGGAAGGTTGCTTGGTGACGATCAGCTTTATAATG
TGATTGTGACTGCTCATGCTTTTATAATGATTTTCTTTTTGGTAATGCCTATGATGATTG
GGGGTTTTGGTAATTGGTTGATTCCACTAATGATTGGGGCACCTGATATGGCTTTTCCTC
GATTAAATAATTTGAGGTTTTGGTTGCTTGTGCCGGCCCTTTTTTTGTTGTTGAGGTCTT
CACTTGTAGAGAGTGGGGTTGGAACAGGTTGGACTGTGTATCCGCCTTTATCAGGTAATG
TGGCTCATTCTGGTGCTTCGGTGGATTTGGCTATTTTTTCTTTACATCTTGCTGGTGCTT
CTTCCATTTTGGGGGCTATTAATTTTATTTCTACTGTAGGAAATATGCGCTCTCCTGGGT
TAGTTGCTGAGCGAATTCCTTTGTTTGTGTGGGCTGTTACGGTAACAGCTATTTTGTTAG
TAGCTGCGTTGCCTGTATTGGCTGGTGCTATTACTATGTTGCTTACTGATCGTAATCTGA
ATACGTCTTTTTTTGATCCTACTGGTGGGGGAGATCCGATTTTATACATGCATTTATTTT

>biv_612_1_Yaukthwa_nesemanni
GTACGTTATACTTAGTGTTTGCTTTGTGGTCTGGATTGATTGGATTAGCTTTGAGTCTTT
TGATTCGTGCTGAGTTAGGGCAGCCTGGAAGGTTGCTTGGTGACGATCAGCTTTATAATG
TGATTGTGACTGCTCATGCTTTTATAATGATTTTCTTTTTGGTAATGCCTATGATGATTG
GGGGTTTTGGTAATTGGTTGATTCCAGTAATGATTGGGGCACCTGATATGGCTTTTCCTC
GATTAAATAATTTGAGGTTTTGGTTGCTTGTGCCGGCTCTTTTTTTGTTGTTGAGGTCTT
CACTTGTAGAGAGTGGGGTTGGAACAGGTTGGACTGTGTATCCGCCTTTATCAGGTAATG
TGGCTCATTCTGGTGCTTCGGTGGATTTGGCTATTTTTTCTTTACATCTTGCTGGTGCTT
CTTCCATTTTGGGGGCTATTAATTTTATTTCTACTGTAGGGAATATGCGCTCTCCTGGGT
TAGTCGCTGAGCGAATTCCTTTGTTTGTGTGGGCTGTTACGGTAACAGCTATTTTGTTAG
TAGCTGCGTTGCCTGTATTGGCTGGTGCTATTACTATGTTGCTTACTGATCGTAATCTGA
ATACGTCTTTTTTTGATCCTACTGGTGGGGGAGATCCGATTTTATACATGCATTTATTTT

>biv_613_1_Yaukthwa_nesemanni
GTACGTTATACTTAGTGTTTGCTTTGTGGTCTGGATTGATTGGATTAGCTTTGAGCCTTT
TGATTCGTGCTGAGTTAGGGCAGCCTGGAAGGTTGCTTGGTGACGACCAGCTTTATAATG
TGATTGTGACTGCTCATGCTTTTATAATGATTTTCTTTTTGGTAATGCCTATGATGATTG
GGGGTTTTGGTAATTGGTTGATTCCACTAATGATTGGGGCACCTGATATGGCTTTTCCTC
GATTAAATAATTTGAGGTTTTGGTTGCTTGTGCCGGCTCTTTTTTTGTTGTTGAGGTCTT
CACTTGTAGAGAGTGGGGTTGGAACAGGTTGGACTGTGTATCCGCCTTTATCAGGTAATG
TGGCTCATTCTGGTGCTTCGGTGGATTTGGCTATTTTTTCTTTACATCTTGCTGGTGCTT
CTTCCATTTTGGGGGCTATTAATTTTATTTCTACTGTAGGGAATATGCGCTCTCCTGGGT
TAGTTGCTGAGCGAATTCCTTTGTTTGTGTGGGCTGTTACGGTAACAGCTATTTTGTTAG
TAGCTGCGTTGCCTGTATTGGCTGGTGCTATTACTATGTTGCTTACTGATCGTAATCTGA
ATACGTCTTTTTTTGATCCTACTGGTGGGGGAGATCCGATTTTATACATGCATTTATTTT

>biv_437_Yaukthwa_nesemanni
GTACGTTATACTTAGTGTTTGCTTTGTGGTCTGGATTGATTGGATTAGCTTTGAGTCTTT
TGATTCGTGCTGAGTTAGGGCAGCCTGGAAGGTTGCTTGGTGACGATCAGCTTTATAATG
TGATTGTGACTGCTCATGCTTTTATAATGATTTTCTTTTTGGTAATGCCTATGATGATTG
GGGGTTTTGGTAATTGGTTGATTCCACTAATGATTGGGGCACCTGATATGGCTTTTCCTC
GATTAAATAATTTGAGGTTTTGGTTGCTTGTGCCGGCTCTTTTTTTGTTGTTGAGGTCTT
CACTTGTAGAGAGTGGGGTTGGAACAGGTTGGACTGTGTATCCGCCTTTATCAGGTAATG
TGGCTCATTCTGGTGCTTCGGTGGATTTGGCTATTTTTTCTTTACATCTTGCTGGTGCTT
CTTCCATTTTGGGGGCTATTAATTTTATTTCTACTGTAGGGAATATGCGCTCTCCTGGGT
TAGTCGCTGAGCGAATTCCTTTGTTTGTGTGGGCTGTTACGGTAACAGCTATTTTGTTAG
TGGCTGCGTTGCCTGTATTGGCTGGTGCTATTACTATGTTGCTTACTGATCGTAATCTGA
ATACGTCTTTTTTTGACCCTACTGGTGGGGGAGATCCGATTTTATATATACATTTATTTT

>biv_1022_3_Yaukthwa_nesemanni
GTACGTTATATTTAGTGTTTGCTTTGTGGTCTGGATTGGTTGGATTAGCTTTGAGTCTTT
TGATTCGTGCTGAGTTAGGGCAGCCTGGAAGGTTGCTTGGTGACGATCAGCTTTATAATG
TGATTGTGACTGCTCATGCTTTTATAATGATTTTCTTTTTGGTAATGCCTATGATGATTG
GGGGTTTTGGTAATTGGTTGATTCCCCTAATGATTGGGGCACCTGATATGGCTTTTCCTC
GATTAAATAATTTGAGGTTTTGGTTGCTTGTGCCGGCTCTTTTTTTGTTGTTGAGGTCTT
CACTTGTAGAGAGTGGGGTTGGAACAGGTTGGACTGTGTATCCGCCTTTATCAGGTAATG
TGGCTCATTCTGGTGCTTCGGTGGATTTGGCTATTTTTTCTTTACATCTTGCTGGTGCTT
CTTCCATTTTGGGGGCTATTAACTTTATTTCTACTGTAGGGAATATGCGCTCTCCTGGGT
TAGTCGCTGAGCGAATTCCTTTGTTTGTGTGGGCTGTTACGGTAACAGCTATTTTGTTAG
TGGCTGCGTTGCCTGTATTGGCTGGTGCTATTACTATGTTGCTTACTGATCGTAATCTGA
ATACGTCTTTTTTTGACCCTACTGGTGGGGGAGATCCTATTTTATATATGCATTTATTTT

>biv_155_4_Yaukthwa_panhai
GTACGTTATATTTAGTGTTTGCTTTGTGGTCTGGGTTGATTGGGTTAGCTTTGAGGCTTT
TAATTCGTGCTGAGTTAGGGCAACCTGGAAGGTTGCTTGGTGATGATCAGCTTTATAATG
TGATTGTGACTGCTCATGCTTTTATGATAATTTTTTTCTTGGTAATGCCTATAATAATCG
GGGGTTTTGGTAATTGGTTAATTCCCTTAATAATTGGGGCACCTGACATGGCTTTTCCTC
GATTAAATAATTTAAGGTTTTGGTTGCTTGTGCCGGCTCTTTTTTTGCTGTTGAGTTCTT
CCCTTGTAGAGAATGGGGTTGGAACAGGTTGGACTGTGTATCCACCTTTATCGGGTAATG
TGGCTCATTCAGGTGCTTCGGTGGATTTGGCTATTTTTTCTTTGCACCTTGCTGGTGCTT
CTTCCATTTTGGGGGCTATTAATTTTATTTCTACTGTAGGAAATATGCGCTCTCCTGGGT
TAGTTGCTGAGCGAATTCCTTTATTTGTGTGGGCTGTTACAGTAACAGCTATTTTGTTAG
TGGCTGCGTTGCCTGTGCTGGCTGGGGCTATTACCATATTACTTACTGATCGTAATTTAA
ATACGTCTTTTTTTGATCCTACTGGTGGGGGAGATCCAATTTTATATATGCATTTGTTTT

>biv_155_11_Yaukthwa_panhai
GTACGTTATATTTAGTGTTTGCTTTGTGGTCTGGGTTGATTGGGTTAGCTTTGAGGCTTT
TAATTCGTGCTGAGTTAGGGCAACCTGGAAGGTTGCTTGGTGATGATCAGCTTTATAATG
TGATTGTGACTGCTCATGCTTTTATGATAATTTTTTTCTTGGTAATGCCTATAATAATCG
GGGGTTTTGGTAATTGGTTAATTCCCTTAATAATTGGGGCACCTGACATGGCTTTTCCTC
GATTAAATAATTTAAGGTTTTGGTTGCTTGTGCCGGCTCTTTTTTTGCTGTTGAGTTCTT
CCCTTGTAGAGAGTGGGGTTGGAACAGGTTGGACTGTGTATCCACCTTTATCGGGTAATG
TGGCTCATTCAGGTGCTTCGGTGGATTTGGCTATTTTTTCTTTGCACCTTGCTGGTGCTT
CTTCCATTTTGGGGGCTATTAATTTTATTTCTACTGTAGGAAATATGCGCTCTCCTGGGT
TAGTTGCTGAGCGAATTCCTTTATTTGTGTGGGCTGTTACAGTAACAGCTATTTTGTTAG
TGGCTGCGTTGCCTGTGCTGGCTGGGGCTATTACCATATTACTTACTGATCGTAATTTAA
ATACGTCTTTTTTTGATCCTACTGGTGGGGGAGATCCAATTTTATATATGCATTTGTTTT

>biv_114_1_Yaukthwa_inlenensis
GTACTTTATATTTATTGTTTGCTTTGTGGTCTGGGTTGATTGGGTTAGCTTTGAGGCTTT
TGATCCGGGCTGAATTGGGGCAACCTGGAAGGTTGCTTGGTGATGATCAGCTTTATAATG
TGATTGTGACTGCTCATGCTTTTATGATGATTTTTTTCTTGGTAATGCCTATAATAATTG
GGGGTTTTGGTAATTGGTTAATTCCATTAATGATTGGGGCACCTGATATGGCTTTCCCTC
GCTTAAATAATTTGAGGTTTTGGTTACTTGTGCCGGCTCTTTTTTTGTTGTTGAGGTCCT
CACTTGTAGAGAGTGGGGTTGGAACAGGTTGGACTGTGTACCCCCCTTTGTCAGGTAATG
TAGCTCATTCTGGTGCTTCGGTGGATTTGGCTATTTTTTCTTTACATCTTGCTGGTGCTT
CTTCTATTTTAGGAGCTATTAATTTTATTTCTACTGTAGGAAATATGCGTTCTCCTGGGT
TGGTTGCTGAGCGAATTCCTTTATTTGTGTGGGCTGTTACGGTAACAGCTATTTTGTTAG
TGGCTGCGTTACCTGTGTTAGCTGGGGCTATTACTATATTACTTACTGATCGCAATTTAA
ATACGTCTTTTTTTGATCCTACTGGGGGGGGAGATCCGATTTTGTATATACATTTGTTTT

>biv_114_2_Yaukthwa_inlenensis
GTACTTTATATTTATTGTTTGCTTTGTGGTCTGGGTTGATTGGGTTACCTTTGAGGCTTT
TGATCCGGGCTGAATTGGGGCAACCTGGAAGGTTGCTTGGTGATGATCAGCTTTATAATG
TGATTGTGACTGCTCATGCTTTTATGATGATTTTTTTCTTGGTAATGCCTATAATAATTG
GGGGTTTTGGTAATTGGTTAATTCCATTAATGATTGGGGCACCTGATATGGCTTTCCCTC
GCTTAAATAATTTGAGGTTTTGGTTACTTGTGCCGGCTCTTTTTTTGTTGTTGAGGTCCT
CACTTGTAGAGAGTGGGGTTGGAACAGGTTGGACTGTGTACCCCCCTTTGTCAGGTAATG
TAGCTCATTCTGGTGCTTCGGTGGATTTGGCTATTTTTTCTTTACATCTTGCTGGTGCTT
CTTCTATTTTAGGAGCTATTAATTTTATTTCTACTGTAGGAAATATGCGTTCTCCTGGGT
TGGTTGCTGAGCGAATTCCTTTATTTGTGTGGGCTGTTACGGTAACAGCTATTTTGTTAG
TGGCTGCGTTACCTGTGTTAGCTGGGGCTATTACTATATTACTTACTGATCGCAATTTAA
ATACGTCTTTTTTTGATCCTACTGGGGGGGGAGATCCGATTTTGTATATACATTTGTTTT

>biv_115_2_Yaukthwa_inlenensis
GTACTTTATATTTATTGTTTGCTTTGTGGTCTGGGTTGATTGGGTTAGCTTTGAGGCTTT
TGATTCGGGCTGAATTGGGGCAACCTGGAAGGTTGCTTGGTGATGATCAGCTTTATAATG
TGATTGTGACTGCTCATGCTTTTATGATGATTTTTTTCTTGGTAATGCCTATAATAATTG
GGGGTTTTGGTAATTGATTAATTCCGTTAATGATTGGGGCACCTGATATGGCTTTCCCTC
GCTTAAATAATTTGAGGTTTTGGTTACTTGTGCCGGCTCTTTTTTTGTTGTTGAGGTCCT
CACTTGTAGAGAGTGGGGTTGGAACAGGTTGGACTGTGTACCCCCCTTTGTCAGGTAATG
TAGCTCATTCTGGTGCTTCGGTGGATTTGGCTATTTTTTCTTTACATCTTGCTGGTGCTT
CTTCTATTTTAGGAGCTATTAACTTTATTTCTACTGTAGGAAATATGCGTTCTCCTGGGT
TGGTTGCTGAGCGAATTCCTTTATTTGTGTGGGCTGTTACGGTAACAGCTATTTTGTTAG
TGGCTGCGTTACCTGTGTTAGCTGGGGCTATTACTATATTACTTACTGATCGCAATTTAA
ATACGTCTTTTTTTGATCCTACTGGGGGGGGAGATCCGATTTTGTATATACATTTGTTTT

>biv_139_7_Yaukthwa_inlenensis
GTACTTTATATTTATTGTTTGCTTTGTGGTCTGGGTTGATTGGGTTAGCTTTGAGGCTTT
TGATCCGGGCTGAATTGGGGCAACCTGGAAGGTTGCTTGGTGATGATCAGCTTTATAATG
TGATTGTGACTGCTCATGCTTTTATGATGATTTTTTTCTTGGTAATGCCTATAATAATTG
GGGGTTTTGGTAATTGGTTAATTCCGTTAATGATTGGGGCACCTGATATGGCTTTCCCTC
GCTTAAATAATTTGAGGTTTTGGTTACTTGTGCCGGCTCTTTTTTTGTTGTTGAGGTCCT
CACTTGTAGAGAGTGGGGTTGGAACAGGTTGGACTGTGTACCCCCCTTTGTCAGGTAATG
TAGCTCATTCTGGTGCTTCGGTGGATTTGGCTATTTTTTCTTTACATCTTGCTGGTGCTT
CTTCTATTTTAGGAGCTATTAATTTTATTTCTACTGTAGGAAATATGCGTTCTCCTGGGT
TGGTTGCTGAGCGAATTCCTTTATTTGTGTGGGCTGTTACGGTAACAGCTATTTTGTTAG
TGGCTGCGTTACCTGTGTTAGCTGGGGCTATTACTATATTACTTACTGATCGCAATTTAA
ATACGTCTTTTTTTGATCCTACTGGGGGGGGAGATCCGATTTTGTATATACATTTGTTTT

>biv_139_15_Yaukthwa_inlenensis
GTACTTTATATTTATTGTTTGCTTTGTGGTCTGGGTTGATTGGGTTAGCTTTGAGGCTTT
TGATCCGGGCTGAATTGGGGCAACCTGGAAGGTTGCTTGGTGATGATCAGCTTTATAATG
TGATTGTGACTGCTCATGCTTTTATGATGATTTTTTTCTTGGTAATGCCTATAATAATTG
GGGGTTTTGGTAATTGGTTAATTCCATTAATGATTGGGGCACCTGATATGGCTTTCCCTC
GCTTAAATAATTTGAGGTTTTGGTTACTTGTGCCGGCTCTTTTTTTGTTGTTGAGGTCCT
CACTTGTAGAGAGTGGGGTTGGAACAGGTTGGACTGTGTACCCCCCTTTGTCAGGTAATG
TAGCTCATTCTGGTGCTTCGGTGGATTTGGCTATTTTTTCTTTACATCTTGCTGGTGCTT
CTTCTATTTTAGGAGCTATTAATTTTATTTCTACTGTAGGAAATATGCGTTCTCCTGGGT
TGGTTGCTGAGCGAATTCCTTTATTTGTGTGGGCTGTTACGGTAACAGCTATTTTGTTAG
TGGCTGCGTTACCTGTGTTAGCTGGGGCTATTACCATATTACTTACTGATCGCAATTTAA
ATACGTCTTTTTTTGATCCTACTGGGGGGGGAGATCCGATTTTGTATATACATTTGTTTT

>biv_139_18_Yaukthwa_inlenensis
GTACTTTATATTTATTGTTTGCTTTGTGGTCTGGGTTGATTGGGTTAGCTTTGAGGCTTT
TGATTCGGGCTGAATTGGGGCAACCTGGAAGGTTGCTTGGTGATGATCAGCTTTATAATG
TAATTGTGACTGCTCATGCTTTTATGATGATTTTTTTCTTGGTAATGCCTATAATAATTG
GGGGTTTTGGTAATTGGTTAATTCCGTTAATGATTGGGGCACCTGATATGGCTTTCCCTC
GCTTAAATAATTTGAGGTTTTGGTTACTTGTGCCGGCTCTTTTTTTGTTGTTGAGGTCCT
CACTTGTAGAGAGTGGGGTTGGAACAGGTTGGACTGTGTACCCCCCTTTGTCAGGTAATG
TAGCTCATTCTGGTGCTTCGGTGGATTTGGCTATTTTTTCTTTACATCTTGCTGGTGCTT
CTTCTATTTTAGGAGCTATTAACTTTATTTCTACTGTAGGAAATATGCGTTCTCCTGGGT
TGGTTGCTGAGCGAATTCCTTTATTTGTGTGGGCTGTTACGGTAACAGCTATTTTGTTAG
TGGCTGCGTTACCTGTGTTAGCTGGGGCTATTACTATATTACTTACTGATCGTAATTTAA
ATACGTCTTTTTTTGATCCTACTGGGGGGGGAGATCCGATTTTGTATATACATTTGTTTT

>biv_140_22_Yaukthwa_inlenensis
GTACTTTATATTTATTGTTTGCTTTGTGGTCTGGGTTGATTGGGTTAGCTTTGAGGCTTT
TGATTCGGGCTGAATTGGGGCAACCTGGAAGGTTGCTTGGTGATGATCAGCTTTATAATG
TAATTGTGACTGCTCATGCTTTTATGATGATTTTTTTCTTGGTAATGCCTATAATAATTG
GGGGTTTTGGTAATTGGTTAATTCCGTTAATGATTGGGGCACCTGATATGGCTTTCCCTC
GCTTAAATAATTTGAGGTTTTGGTTACTTGTGCCGGCTCTTTTTTTGTTGTTGAGGTCCT
CACTTGTAGAGAGTGGGGTTGGAACAGGTTGGACTGTGTACCCCCCTTTGTCAGGTAATG
TAGCTCATTCTGGTGCTTCGGTGGATTTGGCTATTTTTTCTTTACATCTTGCTGGTGCTT
CTTCTATTTTAGGAGCTATTAACTTTATTTCTACTGTAGGAAATATGCGTTCTCCTGGGT
TGGTTGCTGAGCGAATTCCTTTGTTTGTGTGGGCTGTTACGGTAACAGCTATTTTGTTAG
TGGCTGCGTTACCTGTGTTAGCTGGGGCTATTACTATATTACTTACTGATCGTAATTTAA
ATACGTCTTTTTTTGATCCTACTGGGGGGGGAGATCCGATTTTGTATATACATTTGTTTT

>biv_140_24_Yaukthwa_inlenensis
GTACTTTATATTTATTGTTTGCTTTGTGGTCTGGGTTGATTGGGTTAGCTTTGAGGCTTT
TGATCCGGGCTGAATTGGGGCAACCTGGAAGGTTGCTTGGTGATGATCAGCTTTATAATG
TGATTGTGACTGCTCATGCTTTTATGATGATCTTTTTCTTGGTAATACCTATAATAATTG
GGGGTTTTGGTAATTGGTTAATTCCATTAATGATTGGGGCACCTGATATGGCTTTCCCTC
GCTTAAATAATTTGAGGTTTTGGTTACTTGTGCCGGCTCTTTTTTTGTTGTTGAGGTCCT
CACTTGTAGAGAGTGGGGTTGGAACAGGTTGGACTGTGTACCCCCCTTTGTCAGGTAATG
TAGCTCATTCTGGTGCTTCGGTGGATTTGGCTATTTTTTCTTTACATCTTGCTGGTGCTT
CTTCTATTTTAGGAGCTATTAATTTTATTTCTACTGTAGGAAATATGCGTTCTCCTGGGT
TGGTTGCTGAGCGAATTCCTTTATTTGTGTGGGCTGTTACGGTAACAGCTATTTTGTTAG
TGGCTGCGTTACCTGTGTTAGCTGGGGCTATTACTATATTACTTACTGATCGCAATTTAA
ATACGTCTTTTTTTGATCCTACTGGGGGGGGAGATCCGATTTTGTATATACATTTGTTTT

>biv_111_2_Yaukthwa_rectangularis
GTACGTTATATTTAGTGTTTGCTTTGTGGTCTGGATTGATTGGATTAGCTTTGAGTCTTT
TGATTCGTGCTGAGTTAGGGCAGCCTGGAAGGTTGCTTGGTGACGATCAGCTTTATAATG
TGATTGTGACTGCTCATGCTTTTATAATGATTTTCTTCTTGGTAATGCCTATGATGATTG
GAGGTTTTGGTAATTGGTTGATTCCCCTAATGATTGGGGCACCTGATATGGCTTTTCCTC
GATTAAATAATTTGAGGTTTTGGTTGCTTGTGCCGGCTCTTTTTTTGCTGTTGAGGTCTT
CACTTGTAGAGAGTGGGGTTGGAACAGGTTGGACTGTGTATCCACCTTTATCGGGTAATG
TGGCTCATTCTGGTGCTTCGGTGGATTTGGCTATTTTTTCTTTACATCTTGCTGGTGCTT
CTTCCATTTTGGGGGCTATTAATTTTATCTCTACTGTGGGGAATATGCGCTCTCCTGGGT
TAGTTGCTGAGCGAATTCCTTTGTTTGTGTGGGCTGTTACGGTAACAGCTATTTTGTTAG
TGGCTGCGTTGCCTGTATTGGCTGGTGCTATTACTATGTTGCTTACTGATCGTAATCTAA
ACACGTCTTTTTTTGATCCTACTGGTGGGGGAGATCCGATTTTATATATGCATTTGTTTT

>biv_111_43_Yaukthwa_rectangularis
GTACGTTATATTTAGTGTTTGCTTTGTGGTCTGGATTGATTGGATTAGCTTTGAGTCTTT
TGATTCGTGCTGAGTTAGGGCAGCCTGGAAGGTTGCTTGGTGACGATCAGCTTTATAATG
TGATTGTGACTGCTCATGCTTTTATAATGATTTTCTTCTTGGTAATGCCTATGATGATTG
GGGGTTTTGGTAATTGATTGATTCCCCTAATGATTGGGGCACCTGATATGGCTTTTCCTC
GATTAAATAATTTGAGGTTTTGGTTGCTTGTGCCAGCTCTTTTTTTGCTGTTGAGGTCTT
CACTTGTAGAGAGTGGGGTTGGAACAGGTTGGACTGTGTATCCACCTTTATCGGGTAATG
TGGCTCATTCTGGTGCTTCGGTGGATTTGGCTATTTTTTCTTTACATCTTGCTGGTGCTT
CTTCCATTTTGGGGGCTATTAATTTTATTTCTACTGTGGGGAATATGCGCTCTCCTGGGT
TAGTTGCTGAGCGAATTCCTTTGTTTGTGTGAGCTGTTACCGTAACAGCTATTTTGTTAG
TGGCTGCGTTGCCTGTATTGGCTGGTGCTATTACTATGTTGCTTACTGATCGTAATCTAA
ACACGTCTTTTTTTGATCCTACTGGTGGGGGAGATCCGATTTTATATATGCATTTGTTTT

>biv_101_4_Yaukthwa_rectangularis
GTACGTTATATTTAGTGTTTGCTTTGTGGTCTGGATTGATTGGATTAGCTTTGAGTCTTT
TGATTCGTGCTGAGTTAGGGCAGCCTGGAAGGTTGCTTGGTGACGATCAGCTTTATAATG
TGATTGTGACTGCTCATGCTTTTATAATGATTTTCTTCTTGGTAATGCCTATGATGATTG
GGGGTTTTGGTAATTGGTTGATTCCCCTAATGATTGGGGCACCTGATATGGCTTTTCCTC
GATTAAATAATTTGAGGTTTTGGTTGCTTGTGCCGGCTCTTTTTTTGTTGTTGAGGTCTT
CACTTGTAGAGAGTGGGGTTGGAACAGGTTGGACTGTGTATCCACCTTTATCTGGTAATG
TGGCTCATTCTGGTGCTTCGGTGGATTTGGCTATTTTTTCTTTACATCTTGCTGGTGCTT
CTTCCATTTTGGGGGCTATTAATTTTATCTCTACTGTGGGGAATATGCGCTCTCCTGGGT
TAGTTGCTGAGCGAATTCCTTTGTTTGTGTGGGCTGTTACCGTAACAGCTATTTTGTTAG
TGGCTGCGTTGCCTGTATTGGCTGGTGCTATTACTATGTTGCTTACTGATCGTAATCTAA
ACACGTCTTTTTTTGATCCTACTGGTGGGGGAGATCCGATTTTATATATGCATTTGTTTT

>biv_102_7_Yaukthwa_rectangularis
GTACGTTATATTTAGTGTTTGCTTTGTGGTCTGGATTGATTGGATTAGCTTTGAGTCTTT
TGATTCGTGCTGAGTTAGGGCAGCCTGGAAGGTTGCTTGGTGACGATCAGCTTTATAATG
TGATTGTGACTGCTCATGCCTTTATAATGATTTTCTTCTTGGTAATGCCTATGATGATTG
GGGGTTTTGGTAATTGGTTGATTCCCCTAATGATTGGGGCACCTGATATGGCTTTTCCTC
GATTAAATAATTTGAGGTTTTGGTTGCTTGTGCCGGCTCTTTTTTTGTTGTTGAGGTCTT
CACTTGTAGAGAGTGGGGTTGGAACAGGTTGGACTGTGTATCCACCTTTATCTGGTAATG
TGGCTCATTCTGGTGCTTCGGTGGATTTGGCTATTTTTTCTTTACATCTTGCTGGTGCTT
CTTCCATTTTGGGGGCTATTAATTTTATCTCTACTGTGGGGAATATGCGCTCTCCTGGGT
TAGTTGCTGAGCGAATTCCTTTGTTTGTGTGGGCTGTTACCGTAACAGCTATTTTGTTAG
TGGCTGCGTTGCCTGTATTGGCTGGTGCTATTACTATGTTGCTTACTGATCGTAATCTAA
ACACGTCTTTTTTTGATCCTACTGGTGGGGGAGATCCGATTTTATATATGCATTTGTTTT

>biv_916_1_Yaukthwa_rectangularis
GTACGTTATATTTAGTGTTTGCTTTGTGGTCTGGATTGATTGGATTAGCTTTGAGTCTTT
TGATTCGTGCTGAGTTAGGGCAACCTGGAAGGTTGCTTGGTGACGATCAGCTTTATAATG
TGATTGTGACTGCCCATGCTTTTATAATGATTTTCTTCTTGGTAATGCCTATGATGATTG
GGGGTTTTGGTAATTGATTGATTCCCCTAATGATTGGGGCACCTGATATGGCTTTTCCTC
GATTAAATAATTTGAGGTTTTGGTTGCTTGTGCCGGCTCTTTTTTTGCTGTTGAGGTCTT
CACTTGTAGAGAGTGGGGTTGGAACAGGTTGGACTGTGTATCCACCTTTATCGGGTAATG
TGGCTCATTCTGGTGCTTCGGTGGATTTGGCTATTTTTTCTTTACATCTTGCTGGTGCTT
CTTCCATTTTGGGGGCTATTAATTTTATCTCTACTGTGGGGAATATGCGCTCTCCTGGGT
TAGTTGCTGAGCGAATTCCTTTGTTTGTGTGGGCTGTTACGGTAACAGCTATTTTGTTAG
TGGCTGCGTTGCCTGTATTGGCTGGTGCTATTACTATGTTGCTTACTGATCGTAATTTAA
ACACGTCTTTTTTTGATCCTACTGGTGGGGGAGATCCGATTTTATATATGCATTTGTTTT

>biv_916_3_Yaukthwa_rectangularis
GTACGTTATATTTAGTGTTTGCTTTGTGGTCTGGATTGATTGGATTAGCTTTGAGTCTTT
TGATTCGTGCTGAGTTAGGGCAGCCTGGAAGGTTGCTTGGTGACGATCAGCTTTATAATG
TGATTGTGACTGCTCATGCTTTTATAATGATTTTCTTCTTGGTAATGCCTATGATGATTG
GGGGTTTTGGTAATTGATTGATTCCCCTAATGATTGGGGCACCTGATATGGCTTTTCCTC
GATTAAATAATTTGAGGTTTTGGTTGCTCGTGCCGGCTCTTTTTTTGCTGTTGAGGTCTT
CACTTGTAGAGAGTGGGGTTGGAACAGGTTGGACTGTGTATCCACCTTTATCGGGTAATG
TGGCTCATTCTGGTGCTTCGGTGGATTTGGCTATTTTTTCTTTACATCTTGCTGGTGCTT
CTTCCATTTTGGGGGCTATTAATTTTATCTCTACTGTGGGGAATATGCGCTCTCCTGGGT
TAGTTGCTGAGCGAATTCCTTTGTTTGTGTGGGCTGTTACGGTAACAGCTATTTTGTTAG
TGGCTGCGTTGCCTGTATTGGCTGGTGCTATTACTATGTTGCTTACTGACCGTAATCTAA
ACACGTCTTTTTTTGATCCTACTGGTGGGGGAGATCCGATTTTATATATGCATTTGTTTT

>biv_917_1_Yaukthwa_rectangularis
GTACGTTATATTTAGTGTTTGCTTTGTGGTCTGGATTGATTGGATTAGCTTTGAGTCTTT
TGATTCGTGCTGAGTTAGGGCAACCTGGAAGGTTGCTTGGTGACGATCAGCTTTATAATG
TGATTGTGACTGCCCATGCTTTTATAATGATTTTCTTCTTGGTAATGCCTATGATGATTG
GGGGTTTTGGTAATTGATTGATTCCCCTAATGATTGGGGCACCTGATATGGCTTTTCCTC
GATTAAATAATTTGAGGTTTTGGTTGCTTGTGCCGGCTCTTTTTTTGTTGTTGAGGTCTT
CACTTGTAGAGAGTGGGGTTGGAACAGGTTGGACTGTGTATCCACCTTTATCGGGTAATG
TGGCTCATTCTGGTGCTTCGGTGGATTTGGCTATTTTTTCTTTACATCTTGCTGGTGCTT
CTTCCATTTTGGGGGCTATTAATTTTATCTCTACTGTGGGGAATATGCGCTCTCCTGGGT
TAGTTGCTGAGCGAATTCCTTTGTTTGTGTGGGCTGTTACGGTAACAGCTATTTTGTTAG
TGGCTGCGTTGCCTGTATTGGCTGGTGCTATTACTATGTTGCTTACTGATCGTAATTTAA
ACACGTCTTTTTTTGATCCTACTGGTGGGGGAGATCCGATTTTATATATGCATTTGTTTT

>biv_680_3_Yaukthwa_rectangularis
GTACTTTATATTTATTGTTTGCTTTGTGGTCTGGATTGATTGGATTAGCTTTGAGGCTTT
TGATTCGGGCTGAATTAGGGCAACCTGGAAGGTTGCTTGGTGATGATCAGCTTTATAATG
TGATTGTGACTGCTCATGCTTTTATGATGATTTTTTTCTTGGTAATGCCTATAATAATTG
GGGGTTTTGGTAATTGATTAATTCCCCTAATGATTGGGGCACCTGATATGGCTTTCCCTC
GCTTAAATAATTTGAGGTTTTGGTTACTTGTGCCGGCTCTTTTTTTGTTGTTGAGGTCCT
CACTTGTAGAGAGTGGAGTTGGAACAGGTTGGACTGTGTATCCACCTTTGTCAGGTAATG
TAGCACATTCTGGTGCTTCGGTGGATTTGGCTATTTTTTCTTTACATCTTGCTGGTGCTT
CTTCTATTCTAGGAGCTATTAACTTTATCTCTACTGTAGGAAATATGCGTTCTCCTGGGT
TAGTTGCTGAGCGAATTCCTTTATTTGTGTGGGCTGTTACGGTAACAGCTATTTTGTTAG
TGGCTGCGTTACCTGTGTTAGCTGGGGCTATTACTATATTACTTACTGATCGTAATCTAA
ATACGTCTTTTTTTGACCCTACTGGAGGGGGAGATCCTATTTTGTATATACATTTGTTTT

>biv_937_2_Yaukthwa_rectangularis
GTACGTTATATTTAGTGTTTGCTTTGTGGTCTGGATTGATTGGATTAGCTTTGAGTCTTT
TGATTCGTGCTGAGTTAGGGCAGCCTGGAAGGTTGCTTGGTGACGATCAGCTTTATAATG
TGATTGTGACTGCTCATGCTTTTATAATGATTTTCTTCTTGGTAATGCCTATGATGATTG
GGGGTTTTGGTAATTGATTGATTCCCTTAATGATTGGGGCACCTGATATGGCTTTTCCTC
GATTAAATAATTTGAGGTTTTGGTTGCTTGTGCCGGCTCTTTTTTTGCTGTTGAGGTCTT
CACTTGTAGAGAGTGGGGTTGGAACAGGTTGGACTGTGTATCCACCTTTATCGGGTAATG
TGGCTCATTCTGGTGCTTCGGTGGATTTGGCTATTTTTTCTTTACATCTTGCTGGTGCTT
CTTCCATTTTGGGGGCTATTAATTTTATCTCTACTGTGGGGAATATGCGCTCTCCTGGGT
TAGTTGCTGAGCGAATTCCTTTGTTTGTGTGAGCTGTTACGGTAACAGCTATTTTGTTAG
TGGCTGCGTTGCCTGTATTGGCTGGTGCTATTACTATGTTGCTTACTGATCGTAATCTAA
ACACGTCTTTTTTTGATCCTACTGGTGGGGGAGATCCGATTTTATATATGCATTTGTTTT

>biv_937_3_Yaukthwa_rectangularis
GTACGTTATATTTAGTGTTTGCTTTGTGGTCTGGATTGATTGGATTAGCTTTGAGTCTTT
TGATTCGTGCTGAGTTAGGGCAGCCTGGAAGGTTGCTTGGTGACGATCAGCTTTATAATG
TGATTGTGACTGCTCATGCTTTTATAATGATTTTCTTCTTGGTAATGCCTATGATGATTG
GGGGTTTTGGTAATTGATTGATTCCCCTAATGATTGGGGCACCTGATATGGCTTTTCCTC
GATTAAATAATTTGAGGTTTTGGTTGCTTGTGCCGGCTCTTTTTTTGCTGTTGAGGTCTT
CACTTGTAGAGAGTGGGGTTGGAACAGGTTGGACTGTGTATCCACCTTTATCGGGTAATG
TGGCTCATTCTGGTGCTTCGGTGGATTTGGCTATTTTTTCTTTACATCTTGCTGGTGCTT
CTTCCATTTTGGGGGCTATTAATTTTATCTCTACTGTGGGGAATATGCGCTCTCCTGGGT
TAGTTGCTGAGCGAATTCCTTTGTTTGTGTGAGCTGTTACGGTAACAGCTATTTTGTTAG
TGGCTGCGTTGCCTGTATTGGCTGGTGCTATTACTATGTTGCTTACTGATCGTAATCTAA
ACACGTCTTTTTTTGATCCTACTGGTGGGGGAGATCCGATTTTATATATGCATTTGTTTT

>biv_961_1_Yaukthwa_rectangularis
GTACGTTATATTTAGTGTTTGCTTTGTGGTCTGGATTGATTGGGTTAGCTTTGAGTCTTT
TGATTCGTGCTGAGTTAGGGCAGCCTGGAAGGTTGCTTGGTGACGATCAGCTTTATAATG
TGATTGTGACTGCTCATGCTTTTATAATGATTTTCTTCTTGGTAATGCCTATGATGATTG
GGGGTTTTGGTAATTGATTGATTCCCCTAATGATTGGGGCACCTGATATGGCTTTTCCTC
GATTAAATAATTTGAGGTTTTGGTTGCTTGTGCCGGCTCTTTTTTTGCTGTTGAGGTCTT
CACTTGTAGAGAGTGGGGTTGGAACAGGTTGAACTGTGTATCCACCTTTATCGGGTAATG
TGGCTCATTCTGGTGCTTCGGTGGATTTGGCTATTTTTTCTTTACATCTTGCTGGTGCTT
CTTCCATTTTGGGGGCTATTAATTTTATCTCTACTGTGGGGAATATGCGCTCTCCTGGGT
TAGTTGCTGAGCGAATTCCTTTGTTTGTGTGAGCTGTTACGGTAACAGCTATTTTGTTAG
TGGCTGCGTTGCCTGTATTGGCTGGTGCTATTACTATGTTGCTTACTGATCGTAATCTAA
ACACGTCTTTTTTTGATCCTACTGGTGGGGGAGATCCGATTTTATATATGCATTTGTTTT

>biv_961_2_Yaukthwa_rectangularis
GTACGTTATATTTAGTGTTTGCTTTGTGGTCTGGATTGATTGGATTAGCTTTGAGTCTTT
TGATTCGTGCTGAGTTAGGGCAGCCTGGAAGGTTGCTTGGTGACGATCAGCTTTATAATG
TGATTGTGACTGCTCATGCTTTTATAATGATTTTCTTCTTGGTAATGCCTATGATGATTG
GGGGTTTTGGTAATTGATTGATTCCCCTAATGATTGGGGCACCTGATATGGCTTTTCCTC
GATTAAATAATTTGAGGTTTTGGTTGCTTGTGCCGGCTCTTTTTTTGCTGTTGAGGTCTT
CACTTGTAGAGAGTGGGGTTGGAACAGGTTGGACTGTGTATCCACCTTTATCGGGTAATG
TGGCTCATTCTGGTGCTTCGGTGGATTTGGCTATTTTTTCTTTACATCTTGCTGGTGCTT
CTTCCATTTTGGGGGCTATTAATTTTATCTCTACTGTGGGGAATATGCGCTCTCCTGGGT
TAGTTGCTGAGCGAATTCCTTTGTTTGTGTGAGCTGTTACCGTAACAGCTATTTTGTTAG
TGGCTGCGTTGCCTGTATTGGCTGGTGCTATTACTATGTTGCTTACTGATCGTAATCTAA
ACACGTCTTTTTTTGATCCTACTGGTGGGGGAGATCCGATTTTATATATGCATTTGTTTT

>biv_961_3_Yaukthwa_rectangularis
GTACGTTATATTTAGTGTTTGCTTTGTGGTCTGGATTGATTGGATTAGCTTTGAGTCTTT
TGATTCGTGCTGAGTTAGGGCAGCCTGGAAGGTTGCTTGGTGACGATCAGCTTTATAATG
TGATTGTGACTGCTCATGCTTTTATAATGATTTTTTTCTTGGTAATGCCTATGATGATTG
GGGGTTTTGGTAATTGATTGATTCCCCTAATGATTGGGGCACCTGATATGGCTTTTCCTC
GATTAAATAATTTGAGGTTTTGGTTGCTTGTGCCGGCTCTTTTTTTGCTGTTGAGGTCTT
CACTTGTAGAGAGTGGGGTTGGAACAGGTTGGACTGTGTATCCACCTTTATCGGGTAATG
TGGCTCATTCTGGTGCTTCGGTGGATTTGGCTATTTTTTCTTTACATCTTGCTGGTGCTT
CTTCCATTTTGGGGGCTATTAATTTTATCTCTACTGTGGGGAATATGCGCTCTCCTGGGT
TAGTTGCTGAGCGAATTCCTTTGTTTGTGTGAGCTGTTACGGTAACAGCTATTTTGTTAG
TGGCTGCGTTGCCTGTATTGGCTGGTGCTATTACTATGTTGCTTACTGATCGTAATCTAA
ACACGTCTTTTTTTGATCCTACTGGTGGGGGAGATCCGATTTTATATATGCATTTGTTTT

>biv_982_1_Yaukthwa_dalliana
GTACTTTATATTTATTGTTTGCTTTGTGGTCTGGATTGATTGGGTTAGCTTTGAGGCTTT
TGATTCGGGCTGAATTAGGGCAACCTGGAAGGTTGCTTGGTGATGATCAGCTTTATAATG
TGATTGTGACTGCTCATGCTTTTATGATGATTTTTTTCTTGGTAATGCCTATAATAATTG
GGGGTTTTGGTAATTGGTTAATTCCGTTAATGATTGGGGCACCTGATATGGCTTTCCCTC
GCTTAAACAATTTGAGGTTTTGGTTACTTGTGCCGGCTCTTTTTTTGTTGTTGAGGTCTT
CACTTGTAGAGAGTGGAGTTGGAACAGGTTGGACTGTGTATCCACCTTTGTCTGGTAATG
TAGCTCATTCTGGTGCTTCGGTGGATTTGGCTATTTTTTCTTTACATCTTGCTGGTGCTT
CTTCTATTTTAGGGGCTATTAACTTTATTTCTACTGTAGGAAATATGCGTTCTCCTGGGT
TAGTTGCTGAGCGAATTCCTTTATTTGTGTGGGCTGTTACGGTAACAGCTATTTTGTTAG
TGGCTGCGTTACCTGTGTTAGCTGGGGCTATTACTATGTTACTTACTGATCGTAATTTAA
ATACGTCTTTTTTTGACCCTACTGGGGGGGGAGATCCAATTTTGTATATACATTTGTTTT

>biv_982_2_Yaukthwa_dalliana
GTACTTTATATTTATTGTTTGCTTTGTGGTCTGGATTGATTGGATTAGCTTTGAGGCTTT
TGATTCGGGCTGAATTAGGGCAACCTGGAAGGTTGCTTGGTGATGATCAGCTTTATAATG
TGATTGTGACTGCTCATGCTTTTATGATGATTTTTTTCTTGGTAATGCCTATAATAATTG
GGGGTTTTGGTAATTGGTTAATTCCGTTAATGATTGGGGCACCTGATATGGCTTTTCCTC
GCTTAAACAATTTGAGGTTTTGGTTACTTGTGCCGGCTCTTTTTTTGTTGTTGAGGTCTT
CACTTGTAGAGAGTGGGGTTGGAACAGGTTGGACTGTGTATCCACCTTTGTCTGGTAATG
TAGCTCATTCTGGTGCTTCGGTGGATTTGGCTATTTTTTCTTTACATCTTGCTGGTGCTT
CTTCTATTCTAGGGGCTATTAACTTTATTTCTACTGTAGGAAATATGCGTTCTCCTGGGT
TAGTTGCTGAGCGAATTCCTTTATTTGTGTGGGCTGTTACCGTAACAGCCATTTTGTTAG
TGGCTGCGTTACCTGTGTTAGCAGGGGCTATTACTATGTTACTTACTGATCGTAATCTAA
ATACGTCTTTTTTTGACCCTACTGGGGGGGGAGATCCAATTTTGTATATACATTTGTTTT

>biv_982_3_Yaukthwa_dalliana
GTACTTTATATTTATTGTTTGCTTTGTGGTCTGGATTGATTGGGTTAGCTTTGAGGCTTT
TGATTCGGGCTGAATTAGGGCAACCTGGAAGGTTGCTTGGTGATGATCAGCTTTATAATG
TGATTGTGACTGCTCATGCTTTTATGATGATTTTTTTCTTGGTAATGCCTATAATAATTG
GGGGTTTTGGTAATTGGTTAATTCCGTTAATGATTGGGGCACCTGATATGGCTTTCCCTC
GCTTAAACAATTTGAGGTTTTGGTTACTTGTGCCGGCTCTTTTTTTGTTGTTGAGGTCTT
CACTTGTAGAGAGTGGAGTTGGAACAGGTTGGACTGTGTATCCACCTTTGTCTGGTAATG
TAGCTCATTCTGGTGCTTCGGTGGATTTGGCTATTTTTTCTTTACATCTTGCTGGTGCTT
CTTCTATTCTAGGGGCTATTAACTTTATTTCTACTGTAGGAAATATGCGTTCTCCTGGGT
TAGTTGCTGAGCGAATTCCTTTATTTGTGTGGGCTGTTACGGTAACAGCTATTTTGTTAG
TGGCTGCGTTACCTGTGTTAGCTGGGGCTATTACTATGTTACTTACTGATCGTAATTTAA
ATACGTCTTTTTTTGACCCTACTGGGGGGGGAGATCCAATTTTGTATATACATTTGTTTT

>biv_346_2_Yaukthwa_elongatula
GTACGCTATACTTACTATTTGCTTTGTGGTCTGGTTTGATTGGGTTAGCCTTGAGCCTTT
TGATTCGGGCGGAGTTAGGGCAACCTGGAAGGTTACTTGGTGATGATCAGCTTTATAATG
TGATTGTGACTGCTCATGCTTTTATGATGATTTTTTTCTTGGTAATACCTATGATAATTG
GCGGTTTTGGTAACTGGTTAATTCCTCTAATGATTGGGGCACCTGATATGGCTTTTCCTC
GGTTAAACAATTTGAGGTTTTGGTTACTTGTGCCAGCTCTTTTTTTGTTGTTGAGATCTT
CTCTTGTAGAGAGTGGGGCTGGAACAGGTTGGACTGTCTATCCGCCTTTATCTGGTAATG
TGGCCCATTCTGGTGCTTCGGTGGATTTAGCTATTTTTTCTTTGCATCTTGCTGGTGCTT
CTTCAATTTTAGGGGCTATTAACTTTATTTCTACTGTAGGGAATATGCGCTCTCCTGGGT
TAGTTGCTGAGCGAATTCCTTTATTCGTGTGGGCTGTTACAGTAACAGCTATTTTGTTGG
TAGCTGCGTTGCCTGTATTAGCTGGGGCTATTACTATGTTACTTACGGATCGTAATTTAA
ATACGTCTTTTTTTGACCCTACTGGGGGAGGAGATCCTATTTTGTATATACATTTGTTTT

>biv_346_3_Yaukthwa_elongatula
GTACGCTATACTTACTATTTGCTTTGTGGTCTGGTTTGATTGGGTTAGCCTTGAGCCTTT
TGATTCGGGCGGAGTTAGGGCAACCTGGAAGGTTACTTGGTGATGATCAGCTTTATAATG
TGATTGTGACTGCTCATGCTTTTATGATGATTTTTTTCTTGGTAATACCTATGATAATTG
GCGGTTTTGGTAACTGGTTAATTCCTCTAATGATTGGGGCACCTGATATGGCTTTTCCTC
GGTTAAACAATTTGAGGTTTTGGTTACTTGTGCCAGCTCTTTTTTTGTTGTTGAGATCTT
CTCTTGTAGAGAGTGGGGCTGGAACAGGTTGGACTGTCTATCCGCCTTTATCTGGTAATG
TGGCCCATTCTGGTGCTTCGGTGGATTTAGCTATTTTTTCTTTGCATCTTGCTGGTGCTT
CTTCAATTTTAGGGGCTATTAACTTTATTTCTACTGTAGGGAATATGCGCTCTCCTGGGT
TAGTTGCTGAGCGAATTCCTTTATTCGTGTGGGCTGTTACAGTAACAGCTATTTTGTTGG
TAGCTGCGTTGCCTGTATTAGCTGGGGCTATTACTATGTTACTTACGGATCGTAATTTAA
ATACGTCTTTTTTTGACCCTACTGGGGGAGGAGATCCTATTTTGTACATACATTTGTTTT

>biv_339_1_Yaukthwa_elongatula
GTACGCTATACTTACTATTTGCTTTGTGGTCTGGTTTGATTGGGTTAGCCTTGAGCCTTT
TGATTCGGGCGGAGTTAGGGCAACCTGGAAGGTTACTTGGTGATGATCAGCTTTATAATG
TGATTGTGACTGCTCATGCTTTTATGATGATTTTTTTCTTGGTAATACCTATGATAATTG
GCGGTTTTGGTAACTGGTTAATTCCTCTAATGATTGGGGCACCTGATATGGCTTTTCCTC
GGTTAAACAATTTGAGGTTTTGGTTACTTGTGCCAGCTCTTTTTTTGTTGTTGAGATCTT
CTCTTGTAGAGAGTGGGGCTGGAACAGGTTGGACTGTCTATCCGCCTTTATCTGGTAATG
TGGCCCATTCTGGTGCTTCGGTGGATTTAGCTATTTTTTCTTTGCATCTTGCTGGTGCTT
CTTCAATTTTAGGGGCTATTAACTTTATTTCTACTGTAGGGAATATGCGCTCTCCTGGGT
TAGTTGCTGAGCGAATTCCTTTATTCGTGTGGGCTGTTACAGTAACAGCTATTTTGTTGG
TAGCTGCGTTGCCTGTGTTAGCTGGGGCTATTACTATGTTACTTACGGATCGTAATTTAA
ATACGTCTTTTTTTGACCCTACTGGGGGAGGAGATCCTATTTTGTACATACATTTGTTTT

>biv_666_1_Yaukthwa_baniensis
GTACGCTATACTTATTGTTTGCTTTGTGGTCTGGCTTGATTGGGTTAGCCTTGAGCCTTT
TGATTCGGGCGGAGTTAGGGCAACCTGGAAGGTTACTTGGGGACGATCAGCTTTATAATG
TGATTGTGACTGCTCATGCTTTTATGATGATTTTTTTCCTGGTAATGCCAATAATAATTG
GGGGTTTTGGTAATTGGTTAATTCCTTTAATGATTGGGGCACCTGATATGGCTTTCCCTC
GACTAAATAATTTGAGGTTTTGATTACTTGTGCCAGCTCTTTTTTTGTTATTGAGGTCTT
CTCTTGTAGAGAGTGGGGCTGGAACAGGTTGGACTGTATATCCGCCATTATCGGGTAATG
TGGCCCATTCTGGTGCTTCGGTGGATTTAGCTATTTTTTCTTTACATCTTGCTGGTGCTT
CTTCAATTTTAGGGGCTATTAATTTTATTTCTACTGTAGGGAATATGCGTTCTCCTGGGT
TAGTTGCTGAGCGAATTCCTTTATTTGTGTGGGCTGTTACAGTAACAGCTATTTTGCTGG
TGGCTGCGTTGCCTGTGTTAGCTGGGGCTATTACTATGCTACTTACTGATCGTAATTTAA
ATACGTCTTTTTTTGACCCTACTGGTGGAGGAGACCCTATTTTGTATATACATTTGTTTT

>biv_650_2_Yaukthwa_avaensis
GTACTTTATATTTATTGTTTGCTTTGTGGTCTGGATTGATTGGATTAGCTTTGAGGCTTT
TGATTCGGGCTGAATTAGGGCAACCTGGAAGGTTGCTTGGTGATGATCAGCTTTATAATG
TGATTGTGACTGCTCATGCTTTTATGATGATTTTTTTCTTGGTAATGCCTATAATAATTG
GGGGTTTTGGTAATTGATTAATTCCCCTAATGATTGGGGCACCTGATATGGCTTTCCCTC
GCTTAAATAATTTGAGGTTTTGGTTACTTGTGCCGGCTCTTTTTTTGTTGTTGAGGTCCT
CACTTGTAGAGAGTGGAGTTGGAACAGGTTGGACTGTGTATCCACCTTTGTCAGGTAATG
TAGCACATTCTGGTGCTTCGGTGGATTTGGCTATTTTTTCTTTACATCTTGCTGGTGCTT
CTTCTATTCTAGGAGCTATTAACTTTATCTCTACTGTAGGAAATATGCGTTCTCCTGGGT
TAGTTGCTGAGCGAATTCCTTTATTTGTGTGGGCTGTTACGGTAACAGCTATTTTGTTAG
TGGCTGCGTTACCTGTGTTAGCTGGGGCTATTACTATACTACTTACTGATCGCAATTTAA
ATACGTCTTTTTTTGACCCTACTGGAGGGGGAGATCCAATTTTGTATATACATTTGTTTT

>biv_665_1_Yaukthwa_zayleymanensis
GTACGTTATATTTAGTATTTGCTTTGTGGTCTGGATTGATTGGGTTAGCTTTGAGTCTTT
TGATTCGTGCTGAGTTAGGGCAGCCTGGAAGGTTGCTTGGTGACGATCAGCTTTATAATG
TAATTGTGACTGCTCATGCTTTTATAATGATTTTCTTCTTGGTAATGCCTATGATGATTG
GGGGTTTTGGTAATTGGTTGATTCCCCTAATGATTGGGGCACCTGATATGGCTTTTCCTC
GATTAAATAATTTGAGGTTTTGGTTGCTTGTGCCGGCTCTTTTTTTGTTGTTGAGGTCTT
CACTTGTAGAGAGTGGGGTTGGAACAGGTTGGACTGTGTATCCACCTTTATCAGGTAATG
TGGCTCATTCTGGTGCTTCGGTGGATTTGGCTATTTTTTCTTTACATCTTGCTGGTGCTT
CTTCCATTTTGGGGGCTATTAATTTTATCTCTACTGTAGGAAATATACGCTCTCCTGGGT
TAGTCGCTGAGCGAATTCCTTTGTTTGTGTGGGCTGTTACGGTAACAGCTATTTTGTTAG
TAGCTGCGTTGCCTGTATTGGCTGGTGCTATTACTATGTTGCTTACTGATCGTAATTTAA
ATACGTCTTTTTTTGACCCTACTGGTGGGGGAGATCCGATTTTATATATGCATTTATTTT

>biv_665_3_Yaukthwa_zayleymanensis
GTACGTTATATTTAGTATTTGCTTTGTGGTCTGGATTGATTGGGTTAGCTTTGAGTCTTT
TGATTCGTGCTGAGTTAGGGCAGCCTGGAAGGTTGCTTGGTGACGATCAGCTTTATAATG
TGATTGTGACTGCTCATGCTTTTATAATGATTTTCTTCTTGGTAATGCCTATGATGATTG
GGGGTTTTGGTAATTGGTTGATTCCCTTAATGATTGGGGCACCTGATATGGCTTTTCCTC
GATTAAATAATTTGAGGTTTTGGTTGCTTGTGCCGGCTCTTTTTTTGTTGTTGAGGTCTT
CACTTGTAGAGAGTGGGGTTGGAACAGGTTGGACTGTGTATCCACCTTTATCAGGTAATG
TGGCTCATTCTGGTGCTTCGGTGGATTTGGCTATTTTTTCTTTACATCTTGCTGGTGCTT
CTTCCATCTTGGGGGCTATTAATTTTATCTCTACTGTAGGAAATATACGCTCTCCTGGGT
TAGTCGCTGAGCGAATTCCTTTGTTTGTGTGGGCTGTTACGGTAACAGCTATTTTGTTAG
TAGCTGCGTTGCCTGTATTGGCTGGTGCTATTACTATGTTGCTTACTGATCGTAATTTAA
ATACGTCTTTTTTTGACCCTACTGGTGGGGGAGATCCGATTTTATATATGCATTTATTTT

>biv_679_1_Yaukthwa_zayleymanensis
GTACGTTATATTTAGTATTTGCTTTGTGGTCTGGATTGATTGGGTTAGCTTTGAGTCTTT
TGATTCGTGCTGAGTTAGGGCAGCCTGGAAGGTTGCTTGGTGACGATCAGCTTTATAATG
TGATTGTGACTGCTCATGCTTTTATAATGATTTTCTTCTTGGTAATGCCTATGATGATTG
GGGGTTTTGGTAATTGGTTGATTCCCCTAATGATTGGGGCACCTGATATGGCTTTTCCTC
GATTAAATAATTTGAGGTTTTGGTTGCTTGTGCCGGCTCTTTTTTTGTTGTTGAGGTCTT
CACTTGTAGAGAGTGGGGTTGGAACAGGTTGGACTGTGTATCCACCTTTATCAGGTAATG
TGGCTCATTCTGGTGCTTCGGTGGATTTGGCTATTTTTTCTTTACATCTTGCTGGTGCTT
CTTCCATTTTGGGGGCTATTAATTTTATCTCTACTGTAGGGAATATGCGCTCTCCTGGGT
TAGTCGCTGAGCGAATTCCTTTGTTTGTGTGGGCTGTTACGGTAACAGCTATTTTGTTAG
TAGCTGCGTTGCCTGTATTGGCTGGTGCTATTACTATGTTGCTTACTGATCGTAATCTAA
ATACGTCTTTTTTTGACCCTACTGGTGGGGGAGATCCGATTTTATATATGCATTTATTTT

>biv_679_3_Yaukthwa_zayleymanensis
GTACGTTATATTTAGTATTTGCTTTGTGGTCTGGATTGATTGGGTTAGCTTTGAGTCTTT
TGATTCGTGCTGAGTTAGGGCAGCCTGGAAGGTTGCTTGGTGACGATCAGCTTTATAATG
TGATTGTGACTGCTCATGCTTTTATAATGATTTTCTTCTTGGTAATGCCTATGATGATTG
GGGGTTTTGGTAATTGGTTGATTCCCCTAATGATTGGGGCACCTGATATGGCTTTTCCTC
GATTAAATAATTTGAGGTTTTGGTTGCTTGTGCCGGCTCTTTTTTTGTTGTTGAGGTCTT
CACTTGTAGAGAGTGGGGTTGGAACAGGTTGGACTGTGTATCCACCTTTATCAGGTAATG
TGGCTCATTCTGGTGCTTCGGTGGATTTGGCTATTTTTTCTTTACATCTTGCTGGTGCTT
CTTCCATTTTGGGGGCTATTAATTTTATTTCTACTGTAGGGAATATGCGCTCTCCTGGGT
TAGTCGCTGAGCGAATTCCTTTGTTTGTGTGGGCTGTTACGGTAACAGCTATTTTGTTAG
TAGCTGCGTTGCCTGTATTGGCTGGTGCTATTACTATGTTGCTTACTGATCGTAATCTAA
ATACGTCTTTTTTTGACCCTACTGGTGGGGGAGATCCGATTTTATATATGCATTTATTTT

>biv_666_6_Yaukthwa_zayleymanensis
GTACGTTATATTTAGTATTTGCTTTGTGGTCTGGATTGATTGGGTTAGCTTTGAGTCTTT
TGATTCGTGCTGAGTTAGGGCAGCCTGGAAGGTTGCTTGGTGACGATCAGCTTTATAATG
TGATTGTGACTGCTCATGCTTTTATAATGATTTTCTTCTTGGTAATGCCTATGATGATTG
GGGGTTTTGGTAATTGGTTGATTCCCTTAATGATTGGGGCACCTGATATGGCTTTTCCTC
GATTAAATAATTTGAGGTTTTGGTTGCTTGTGCCGGCTCTTTTTTTGTTGTTGAGGTCTT
CACTTGTAGAGAGTGGGGTTGGAACAGGTTGGACTGTGTATCCACCTTTATCAGGTAATG
TGGCTCATTCTGGTGCTTCGGTGGATTTGGCTATTTTTTCTTTACATCTTGCTGGTGCTT
CTTCCATCTTGGGGGCTATTAATTTTATCTCTACTGTAGGAAATATACGCTCTCCTGGGT
TAGTCGCTGAGCGAATTCCTTTGTTTGTGTGGGCTGTTACGGTAACAGCTATTTTGTTAG
TAGCTGCGTTGCCTGTATTGGCTGGTGCTATTACTATGTTGCTTACTGATCGTAATTTAA
ATACGTCTTTTTTTGACCCTACTGGTGGGGGAGATCCGATTTTATATATGCATTTATTTN

>biv_918_1_Yaukthwa_zayleymanensis
GTACGTTATATTTAGTATTTGCTTTGTGGTCTGGATTGATTGGGTTAGCTTTGAGTCTTT
TGATTCGTGCTGAGTTAGGGCAGCCTGGAAGGTTGCTTGGTGACGATCAGCTTTATAATG
TGATTGTGACTGCTCATGCTTTTATAATGATTTTCTTCTTGGTAATGCCTATGATGATTG
GGGGTTTTGGTAATTGGTTGATTCCTCTAATGATTGGGGCACCTGATATGGCTTTTCCTC
GATTAAATAATTTGAGGTTTTGGTTGCTTGTGCCGGCTCTTTTTTTGTTGTTGAGGTCTT
CACTTGTAGAGAATGGGGTTGGAACAGGTTGGACTGTGTATCCACCTTTATCAGGTAATG
TGGCTCATTCTGGTGCTTCGGTGGATTTGGCTATTTTTTCTTTACATCTTGCTGGTGCTT
CTTCCATTTTGGGGGCTATTAATTTTATCTCTACTGTAGGGAATATGCGCTCTCCTGGGT
TAGTCGCTGAGCGAATTCCTTTGTTTGTGTGGGCTGTTACGGTAACAGCTATTTTGTTAG
TAGCTGCGTTGCCTGTATTGGCTGGTGCTATTACTATGTTGCTTACTGATCGTAATCTAA
ATACGTCTTTTTTTGATCCTACTGGTGGGGGAGATCCGATTTTATATATGCATTTATTTT
