# Supplementary material for: Follow the Footsteps of Leonardo Fea: An Example of an Integrative Revision of Freshwater Mussel Taxa Described from the Former British Burma (Myanmar)
Source: Hindawi journal article supplement (doi:10.1155/2022/6600359), 2022-05-27
Supplement: f1 [file 6600359.f1.zip › Table S1.docx]

**Table S1.** List of sequences of Unionidae from South-East Asia used in this study.

| **Species** | **Locality** | **Specimen Voucher*** | **NCBI’s GenBank acc. nos.** | | | **Latitude** | **Longitude** |
| --- | --- | --- | --- | --- | --- | --- | --- |
| ***COI*** | ***16S rRNA*** | ***28S rRNA*** |
| **UNIONIDAE Rafinesque, 1820** | | | | | | | |
| **Gonideinae Ortmann, 1916** | | | | | | | |
| **Pseudodontini Frierson, 1927** | | | | | | | |
| **Pseudodontina s. str.** | | | | | | | |
| ***Pseudodon* Gould, 1844** | | | | | | | |
| *Pseudodon* sp. | Myanmar: Ayeyarwady Basin, a tributary of Lake Indawgyi | RMBH: biv 110/5 | KX865858 | KX865859 | KX865860 | 25.1209 | 96.2812 |
| *Pseudodon* sp. | Myanmar: Ayeyarwady Basin, a tributary of Lake Indawgyi | RMBH: biv 110/10 | KX865629 | KX865630 | KX865631 | 25.1209 | 96.2812 |
| *Pseudodon* sp. | Myanmar: Ayeyarwady Basin, a tributary of Lake Indawgyi | RMBH: biv 110/11 | KX865730 | KX865731 | KX865732 | 25.1209 | 96.2812 |
| *P. bogani* Bolotov, Kondakov & Konopleva, 2017 | Myanmar: Sittaung Basin, Kanni River | RMBH: biv 241/4 | MF352216 | MF352290 | MF352348 | 19.0545 | 96.5131 |
| *P. bogani* Bolotov, Kondakov & Konopleva, 2017 | Myanmar: Sittaung Basin, Kanni River | RMBH: biv 241/5 | MF352217 | MF352291 | MF352349 | 19.0545 | 96.5131 |
| *P. bogani* Bolotov, Kondakov & Konopleva, 2017 | Myanmar: Sittaung Basin, Kanni River | RMBH: biv 241/8 | MF352218 | MF352292 | MF352350 | 19.0545 | 96.5131 |
| *P. manueli* Konopleva, Kondakov & Vikhrev, 2017 | Myanmar: Sittaung Basin, Pyowne River | RMBH: biv 246/1 | MF352228 | MF352300 | MF352358 | 18.9694 | 96.5309 |
| *P. manueli* Konopleva, Kondakov & Vikhrev, 2017 | Myanmar: Sittaung Basin, Pyowne River | RMBH: biv 246/3 | MF352229 | MF352301 | MF352359 | 18.9694 | 96.5309 |
| *P. manueli* Konopleva, Kondakov & Vikhrev, 2017 | Myanmar: Sittaung Basin, Pyowne River | RMBH: biv 246/8 | MF352230 | MF352302 | MF352360 | 18.9694 | 96.5309 |
| *P. salwenianus* (Gould, 1844) | Myanmar: Salween Basin, unnamed stream | RMBH: biv 639/1 | MN275037 | MN307237 | MN307178 | 17.0292 | 97.8100 |
| *P. salwenianus* (Gould, 1844) | Myanmar: Salween Basin, Hlangbwe Stream | RMBH: biv 674/1 | MN275040 | MN307238 | MN307179 | 17.0292 | 97.8099 |
| *P. salwenianus* (Gould, 1844) | Myanmar: Salween Basin, Haungthayaw River, Donthami Maw Stream | RMBH: biv 1025 | OL597609 | n/a | n/a | 16.0026 | 98.3796 |
| *P. kayinensis* Bolotov et al., 2020 | Myanmar: Ataran Basin, Winyaw River | RMBH: biv 618/3 | MN275045 | MN307240 | MN307181 | 15.6685 | 97.9496 |
| *P. kayinensis* Bolotov et al., 2020 | Myanmar: Ataran River | RMBH: biv 637/1 | MN275046 | MN307241 | MN307182 | 15.6132 | 98.2363 |
| *P. kayinensis* Bolotov et al., 2020 | Myanmar: Salween Basin, unnamed Stream | RMBH: biv 638/1 | MN275049 | MN307242 | MN307183 | 17.0292 | 97.8100 |
| *P. kayinensis* Bolotov et al., 2020 | Myanmar: Salween Basin, Haungthayaw River, Donthami Maw Stream | RMBH: biv 1026/1 | OL597610 | n/a | n/a | 16.0026 | 98.3796 |
| *P. kayinensis* Bolotov et al., 2020 | Myanmar: Salween Basin, Haungthayaw River, Donthami Maw Stream | RMBH: biv 1026/2 | OL597611 | n/a | n/a | 16.0026 | 98.3796 |
| *P. kayinensis* Bolotov et al., 2020 | Myanmar: Salween Basin, Haungthayaw River, Donthami Maw Stream | RMBH: biv 1026/3 | OL597612 | n/a | n/a | 16.0026 | 98.3796 |
| **Pilsbryoconchina Bolotov, Vikhrev & Tumpeesuwan, 2017** | | | | | | | |
| ***Monodontina* Conrad, 1853** | | | | | | | |
| *Monodontina lenyanensis* Bolotov et al., 2020 | Myanmar: Lenya Basin, 14 mile stream | RMBH: biv 628/1 | MN275054 | MN307245 | MN307186 | 11.3508 | 99.1093 |
| *M. lenyanensis* Bolotov et al., 2020 | Myanmar: Lenya Basin, 14 mile stream | RMBH: biv 628/2 | MN275055 | MN307246 | MN307187 | 11.3508 | 99.1093 |
| *M. lenyanensis* Bolotov et al., 2020 | Myanmar: Lenya Basin, 14 mile stream | RMBH: biv 628/3 | MN275056 | MN307247 | MN307188 | 11.3508 | 99.1093 |
| ***Sundadontina* Bolotov et al., 2020** | | | | | | | |
| *Sundadontina tanintharyiensis* Bolotov et al., 2020 | Myanmar: Lenya Basin, Nauk Pyan Stream | RMBH: biv 643/4 | MN275057 | MN307248 | MN307189 | 11.7620 | 99.1124 |
| **Contradentini Modell, 1942** | | | | | | | |
| ***Lens* Simpson, 1900** | | | | | | | |
| *Lens contradens* (Lea, 1838) | West Malaysia: Pahang River | ANSP:389059 | DQ191411 | n/a | AF400692 | n/a | n/a |
| *L. micropterus* (Morelet, 1866) | Cambodia: Mekong Basin | UMMZ:304652 | KP795034 | KP795054 | KP795016 | n/a | n/a |
| *L. eximius* (Lea, 1856) | Thailand: Mekong Basin, Chi River | RMBH: biv 127 /1 | KX865936 | n/a | KX865807 | 16.2158 | 103.2526 |
| *L. comptus* (Deshayes & Jullien, 1874) | Laos: Mekong Basin, Nam Long River | RMBH: biv 182/3 | KX865930 | KX865684 | KX865801 | 21.7700 | 102.1863 |
| *L. misellus* (Morelet, 1865) | Thailand: Chao Phraya Basin, Ping River | 2014-0685 | MH345986 | MH346026 | MH346006 | 19.2859 | 98.9680 |
| *L.* *pallegoixi* (Sowerby, 1867) | Thailand: Mekong Basin, Mun River drainage, Pao River | 2014-0614 | MH345989 | MH346029 | MH346009 | 16.3402 | 103.5758 |
| *L. rolfbrandti* (Jeratthitikul & Panha, 2021) | Thailand: Huai Luang River at Don Kloi Village, Phibun Rak District, Udon Thani Province | UNI0229 | MG582018 | n/a | n/a | n/a | n/a |
| *L. maenamensis* Pfeiffer et al., 2021 | Thailand: Mekong Basin | MUMNHUNI0946 | MG582015 | n/a | n/a | n/a | n/a |
| *L. novoselovi* (Konopleva et al. 2019) | Laos: Mekong Basin, a tributary of Nam Fa River near Vieng Phou Kha | RMBH: biv 202/2 | KY561630 | KY561645 | KY561662 | 20.6820 | 101.0794 |
| ***Trapezoideus* Simpson, 1900** | | | | | | | |
| *Trapezoideus* *foliaceus* (Gould, 1843) | Thailand: Mae Klong Basin, Pracham Mai River | 2012-0443 | MH345979 | MH346019 | MH345999 | 14.6598 | 98.5342 |
| *T. foliaceus* (Gould, 1843) | Thailand: Mae Klong Basin, Pracham Mai River | 2012-0445 | MH345980 | MH346020 | MH346000 | 14.6598 | 98.5342 |
| *T. foliaceus* (Gould, 1843) | Thailand: Mae Klong Basin, Pracham Mai River | 2012-0457 | MH345981 | MH346021 | MH346001 | 15.2232 | 98.4465 |
| *T. lenya* Bolotov et al., 2020 | Myanmar: Lenya Basin, 14 mile stream | RMBH: biv 629/1 | MN275067 | MN307256 | MN307197 | 11.3508 | 99.1093 |
| *T. lenya* Bolotov et al., 2020 | Myanmar: Lenya Basin, 14 mile stream | RMBH: biv 629/2 | MN275068 | MN307257 | MN307198 | 11.3508 | 99.1093 |
| *T. lenya* Bolotov et al., 2020 | Myanmar: Lenya Basin, 14 mile stream | RMBH: biv 629/3 | MN275069 | MN307258 | MN307199 | 11.3508 | 99.1093 |
| *T. mitanensis* **sp. nov.** | Myanmar: Haungthayaw Basin, Mitan Stream | RMBH: biv 1021/1 | OL597613 | ON142670 | ON171238 | 16.0019 | 98.4064 |
| *T. mitanensis* **sp. nov.** | Myanmar: Haungthayaw Basin, Mitan Stream | RMBH: biv 1021/2 | OL597614 | OL598370 | OL598384 | 16.0019 | 98.4064 |
| *T. mitanensis* **sp. nov.** | Myanmar: Haungthayaw Basin, Mitan Stream | RMBH: biv 1021/3 | OL597615 | n/a | n/a | 16.0019 | 98.4064 |
| *T. mitanensis* **sp. nov.** | Myanmar: Haungthayaw River | RMBH: biv 1022/1 | OL597616 | OL598371 | OL598385 | 15.9620 | 98.4152 |
| *T. mitanensis* **sp. nov.** | Myanmar: Haungthayaw River | RMBH: biv 1022/2 | OL597617 | OL598372 | OL598386 | 15.9620 | 98.4152 |
| ***Physunio* Simpson, 1900** | | | | | | | |
| *Physunio modelli* Brandt, 1974 | Thailand: Mekong Basin, Chi River | RMBH: biv 125/2 | KX865883 | KX865654 | KX865754 | 16.2258 | 103.3007 |
| *P. superbus* (Lea, 1843) | Malaysia | BIV1776 | KX051278 | n/a | n/a | n/a | n/a |
| ***Yaukthwa* Konopeva et al., 2019** | | | | | | | |
| *Yaukthwa nesemanni* (Konopleva, Vikhrev & Bolotov, 2017) | Myanmar: Sittaung Basin, Thauk Ye Kupt River | RMBH: biv 144/14 | KX865906 | KX865663 | KX865777 | 19.3075 | 96.7219 |
| *Y. nesemanni* (Konopleva, Vikhrev & Bolotov, 2017) | Myanmar: Sittaung Basin, Thauk Ye Kupt River | RMBH: biv 144/25 | KX865907 | KX865664 | KX865778 | 19.3075 | 96.7219 |
| *Y. nesemanni* (Konopleva, Vikhrev & Bolotov, 2017) | Myanmar: Sittaung Basin, Thauk Ye Kupt River | RMBH: biv 144/19 | KX865908 | KX865665 | KX865779 | 19.3075 | 96.7219 |
| *Y. nesemanni* (Konopleva, Vikhrev & Bolotov, 2017) | Myanmar: Sittaung Basin, Thauk Ye Kupt River | RMBH: biv 255/2 | MF352254 | n/a | MF352379 | 18.9840 | 96.4361 |
| *Y. nesemanni* (Konopleva, Vikhrev & Bolotov, 2017) | Myanmar: Sittaung Basin, Thauk Ye Kupt River | RMBH: biv 255/3 | MF352255 | n/a | MF352380 | 18.9840 | 96.4361 |
| *Y. nesemanni* (Konopleva, Vikhrev & Bolotov, 2017) | Myanmar: Sittaung Basin, Thauk Ye Kupt River | RMBH: biv 255/4 | MF352256 | n/a | MF352381 | 18.9840 | 96.4361 |
| *Y. nesemanni* (Konopleva, Vikhrev & Bolotov, 2017) | Myanmar: Ayeyarwady Basin, Chindwin River | RMBH: biv 351 | OL597618 | n/a | n/a | 23.1499 | 94.3629 |
| *Y. nesemanni* (Konopleva, Vikhrev & Bolotov, 2017) | Myanmar: Sittaung Basin, Cho River | RMBH: biv 405/1 | OL597619 | n/a | n/a | 19.5069 | 96.5618 |
| *Y. nesemanni* (Konopleva, Vikhrev & Bolotov, 2017) | Myanmar: Sittaung Basin, Cho River | RMBH: biv 405/3 | OL597620 | n/a | n/a | 19.5069 | 96.5618 |
| *Y. nesemanni* (Konopleva, Vikhrev & Bolotov, 2017) | Myanmar: Ayeyarwady River near Mandalay | RMBH: biv 437 | OL597621 | n/a | n/a | 21.9574 | 96.0510 |
| *Y. nesemanni* (Konopleva, Vikhrev & Bolotov, 2017) | Myanmar: Ayeyarwady Basin, Nant Poat Kalay River | RMBH: biv 607/1 | OL597622 | n/a | n/a | 24.2130 | 96.1089 |
| *Y. nesemanni* (Konopleva, Vikhrev & Bolotov, 2017) | Myanmar: Ayeyarwady Basin, Nant Poat Kalay River | RMBH: biv 607/2 | OL597623 | n/a | n/a | 24.2130 | 96.1089 |
| *Y. nesemanni* (Konopleva, Vikhrev & Bolotov, 2017) | Myanmar: Ayeyarwady Basin, Nant Poat Kalay River | RMBH: biv 607/3 | OL597624 | n/a | n/a | 24.2130 | 96.1089 |
| *Y. nesemanni* (Konopleva, Vikhrev & Bolotov, 2017) | Myanmar: Ayeyarwady Basin, Nant Poat Kalay River | RMBH: biv 608/1 | OL597625 | n/a | n/a | 24.2130 | 96.1089 |
| *Y. nesemanni* (Konopleva, Vikhrev & Bolotov, 2017) | Myanmar: Ayeyarwady Basin, Nant Poat Kalay River | RMBH: biv 608/2 | OL597626 | n/a | n/a | 24.2130 | 96.1089 |
| *Y. nesemanni* (Konopleva, Vikhrev & Bolotov, 2017) | Myanmar: Ayeyarwady Basin, Nant Poat Kalay River | RMBH: biv 608/3 | OL597627 | n/a | n/a | 24.2130 | 96.1089 |
| *Y. nesemanni* (Konopleva, Vikhrev & Bolotov, 2017) | Myanmar: Ayeyarwady Basin, Indaw River near Sell Ywar village | RMBH: biv 612/1 | OL597628 | n/a | n/a | 24.2123 | 96.0819 |
| *Y. nesemanni* (Konopleva, Vikhrev & Bolotov, 2017) | Myanmar: Ayeyarwady Basin, Indaw River near Sell Ywar village | RMBH: biv 612/2 | OL597629 | n/a | n/a | 24.2123 | 96.0819 |
| *Y. nesemanni* (Konopleva, Vikhrev & Bolotov, 2017) | Myanmar: Ayeyarwady Basin, Indaw River near Sell Ywar village | RMBH: biv 612/3 | OL597630 | n/a | n/a | 24.2123 | 96.0819 |
| *Y. nesemanni* (Konopleva, Vikhrev & Bolotov, 2017) | Myanmar: Ayeyarwady Basin, Indaw River near Sell Ywar village | RMBH: biv 613/1 | OL597631 | n/a | n/a | 24.2123 | 96.0819 |
| *Y. nesemanni* (Konopleva, Vikhrev & Bolotov, 2017) | Myanmar: Ayeyarwady Basin, Indaw River near Sell Ywar village | RMBH: biv 613/2 | OL597632 | n/a | n/a | 24.2123 | 96.0819 |
| *Y. nesemanni* (Konopleva, Vikhrev & Bolotov, 2017) | Myanmar: Ayeyarwady Basin, Indaw River near Sell Ywar village | RMBH: biv 613/3 | OL597633 | n/a | n/a | 24.2123 | 96.0819 |
| *Y. nesemanni* (Konopleva, Vikhrev & Bolotov, 2017) | Myanmar: Haungthayaw River | RMBH: biv 1022/3 | OL597634 | n/a | n/a | 15.9620 | 98.4152 |
| *Y. panhai* (Konopleva, Bolotov et Kondakov, 2017) | Myanmar: Sittaung Basin, Kyan Hone River | RMBH: biv 138/4 | KX865909 | KX865666 | KX865780 | 19.5099 | 96.8226 |
| *Y. panhai* (Konopleva, Bolotov et Kondakov, 2017) | Myanmar: Sittaung Basin, Kyan Hone River | RMBH: biv 138/7 | KX865910 | KX865667 | KX865781 | 19.5099 | 96.8226 |
| *Y. panhai* (Konopleva, Bolotov et Kondakov, 2017) | Myanmar: Sittaung Basin, Kyan Hone River | RMBH: biv 138/12 | KX865913 | KX865670 | KX865784 | 19.5099 | 96.8226 |
| *Y. panhai* (Konopleva, Bolotov et Kondakov, 2017) | Myanmar: Sittaung Basin, Kyan Hone River | RMBH: biv 155/4 | KX865911 | KX865668 | KX865782 | 19.5059 | 96.8280 |
| *Y. panhai* (Konopleva, Bolotov et Kondakov, 2017) | Myanmar: Sittaung Basin, Kyan Hone River | RMBH: biv 155/11 | KX865914 | KX865671 | KX865785 | 19.5059 | 96.8280 |
| *Y. panhai* (Konopleva, Bolotov et Kondakov, 2017) | Myanmar: Sittaung Basin, Kyan Hone River | RMBH: biv 155/25 | KX865912 | KX865669 | KX865783 | 19.5059 | 96.8280 |
| *Y. inlenensis* Konopleva et al., 2019 | Myanmar: Salween Basin, Inle Lake Channel | RMBH: biv 114/1 | KX865915 | KX865672 | KX865786 | 20.4946 | 96.8772 |
| *Y. inlenensis* Konopleva et al., 2019 | Myanmar: Salween Basin, Inle Lake Channel | RMBH: biv 114/2 | KX865918 | KX865675 | KX865789 | 20.4946 | 96.8772 |
| *Y. inlenensis* Konopleva et al., 2019 | Myanmar: Salween Basin, Inle Lake Channel | RMBH: biv 114/3 | KX865916 | KX865673 | KX865787 | 20.4946 | 96.8772 |
| *Y. inlenensis* Konopleva et al., 2019 | Myanmar: Salween Basin, Inle Lake Channel | RMBH: biv 115/1 | KX865919 | n/a | KX865790 | 20.4705 | 96.8546 |
| *Y. inlenensis* Konopleva et al., 2019 | Myanmar: Salween Basin, Inle Lake Channel | RMBH: biv 115/2 | KX865921 | n/a | KX865792 | 20.4705 | 96.8546 |
| *Y. inlenensis* Konopleva et al., 2019 | Myanmar: Salween Basin, Inle Lake Channel | RMBH: biv 115/3 | KX865920 | n/a | KX865791 | 20.4705 | 96.8546 |
| *Y. inlenensis* Konopleva et al., 2019 | Myanmar: Salween Basin, Mway Stream | RMBH: biv 139/7 | KX865922 | KX865676 | KX865793 | 19.7266 | 97.0992 |
| *Y. inlenensis* Konopleva et al., 2019 | Myanmar: Salween Basin, Mway Stream | RMBH: biv 139/15 | KX865923 | KX865677 | KX865794 | 19.7266 | 97.0992 |
| *Y. inlenensis* Konopleva et al., 2019 | Myanmar: Salween Basin, Mway Stream | RMBH: biv 139/18 | KX865924 | KX865678 | KX865795 | 19.7266 | 97.0992 |
| *Y. inlenensis* Konopleva et al., 2019 | Myanmar: Salween Basin, Nam Pilu River | RMBH: biv 140/22 | KX865925 | KX865679 | KX865796 | 19.6746 | 97.1352 |
| *Y. inlenensis* Konopleva et al., 2019 | Myanmar: Salween Basin, Nam Pilu River | RMBH: biv 140/24 | KX865926 | KX865680 | KX865797 | 19.6746 | 97.1352 |
| *Y. inlenensis* Konopleva et al., 2019 | Myanmar: Salween Basin, Nam Pilu River | RMBH: biv 140/25 | KX865927 | KX865681 | KX865798 | 19.6746 | 97.1352 |
| *Y. inlenensis* Konopleva et al., 2019 | Myanmar: Salween Basin, Mway Stream | RMBH: biv 143/2 | KX865917 | KX865674 | KX865788 | 19.7266 | 97.0992 |
| *Y. paiensis* Konopleva et al., 2019 | Thailand: Salween Basin, Khong River | ICH-00638 | MH345970 | MH346011 | MH345991 | 19.4246 | 98.4013 |
| *Y. paiensis* Konopleva et al., 2019 | Thailand: Salween Basin, Khong River | ICH-00639 | MH345971 | MH346012 | MH345992 | 19.4246 | 98.4013 |
| *Y. paiensis* Konopleva et al., 2019 | Thailand: Salween Basin, Khong River | ICH-00640 | MH345972 | n/a | n/a | 19.4246 | 98.4013 |
| *Y. avaensis* Bolotov et al., 2020 | Myanmar: Ayeyarwady Basin, unnamed stream | RMBH: biv 680/1 | MN275070 | n/a | n/a | 25.2758 | 97.2722 |
| *Y. avaensis* Bolotov et al., 2020 | Myanmar: Ayeyarwady Basin, unnamed stream | RMBH: biv 680/3 | MN275071 | MN307259 | MN307200 | 25.2758 | 97.2722 |
| *Y. avaensis* Bolotov et al., 2020 | Myanmar: Ayeyarwady Basin, unnamed stream | RMBH: biv 680/5 | MN275072 | n/a | MN307201 | 25.2758 | 97.2722 |
| *Y. rectangularis* (Tapparone-Canefri, 1889) | Myanmar: Ayeyarwady Basin, Nanyinhka Chaung River | RMBH: biv 111/2 | KX865889 | KX865656 | KX865760 | 25.0815 | 96.2874 |
| *Y. rectangularis* (Tapparone-Canefri, 1889) | Myanmar: Ayeyarwady Basin, Nanyinhka Chaung River | RMBH: biv 111/21 | KX865890 | KX865657 | KX865761 | 25.0815 | 96.2874 |
| *Y. rectangularis* (Tapparone-Canefri, 1889) | Myanmar: Ayeyarwady Basin, Nanyinhka Chaung River | RMBH: biv 111/43 | KX865891 | KX865658 | KX865762 | 25.0815 | 96.2874 |
| *Y. rectangularis* (Tapparone-Canefri, 1889) | Myanmar: Ayeyarwady Basin, Mali Hka Basin, Pan Khai Stream | RMBH: biv 101/4 | KX865892 | n/a | n/a | 27.4493 | 97.3432 |
| *Y. rectangularis* (Tapparone-Canefri, 1889) | Myanmar: Ayeyarwady Basin, Mali Hka Basin, Pan Khai Stream | RMBH: biv 101/5 | KX865894 | KX865659 | KX865763 | 27.4493 | 97.3432 |
| *Y. rectangularis* (Tapparone-Canefri, 1889) | Myanmar: Ayeyarwady Basin, Mali Hka Basin, Pan Khai Stream | RMBH: biv 101/6 | KX865895 | n/a | KX865764 | 27.4493 | 97.3432 |
| *Y. rectangularis* (Tapparone-Canefri, 1889) | Myanmar: Ayeyarwady Basin, Mali Hka Basin, Nam Balak River | RMBH: biv 102/7 | KX865899 | KX865660 | KX865768 | 27.4741 | 97.3493 |
| *Y. rectangularis* (Tapparone-Canefri, 1889) | Myanmar: Ayeyarwady Basin, Mali Hka Basin, Nam Balak River | RMBH: biv 102/11 | KX865900 | KX865661 | KX865769 | 27.4741 | 97.3493 |
| *Y. rectangularis* (Tapparone-Canefri, 1889) | Myanmar: Ayeyarwady Basin, Mali Hka Basin, Nam Balak River | RMBH: biv 102/14 | KX865901 | KX865662 | KX865770 | 27.4741 | 97.3493 |
| *Y. rectangularis* (Tapparone-Canefri, 1889) | Myanmar: Ayeyarwady Basin, Mali Hka Basin, Mansakun River | RMBH: biv 103/17 | KX865896 | n/a | KX865765 | 27.4909 | 97.3351 |
| *Y. rectangularis* (Tapparone-Canefri, 1889) | Myanmar: Ayeyarwady Basin, Mali Hka Basin, Mansakun River | RMBH: biv 103/18 | KX865897 | n/a | KX865766 | 27.4909 | 97.3351 |
| *Y. rectangularis* (Tapparone-Canefri, 1889) | Myanmar: Ayeyarwady Basin, Mali Hka Basin, Mansakun River | RMBH: biv 103/19 | KX865898 | n/a | KX865767 | 27.4909 | 97.3351 |
| *Y. rectangularis* (Tapparone-Canefri, 1889) | Myanmar: Ayeyarwady Basin, Mali Hka Basin, unnamed stream | RMBH: biv 104/34 | KX865904 | n/a | KX865773 | 27.5475 | 97.3705 |
| *Y. rectangularis* (Tapparone-Canefri, 1889) | Myanmar: Ayeyarwady Basin, Mali Hka Basin, unnamed stream | RMBH: biv 104/35 | KX865905 | n/a | KX865774 | 27.5475 | 97.3705 |
| *Y. rectangularis* (Tapparone-Canefri, 1889) | Myanmar: Ayeyarwady Basin, Mali Hka Basin, Nam Shu River | RMBH: biv 105/24 | KX865893 | n/a | n/a | 27.5482 | 97.3700 |
| *Y. rectangularis* (Tapparone-Canefri, 1889) | Myanmar: Ayeyarwady Basin, Mali Hka Basin, Nam Shu River | RMBH: biv 105/31 | KX865902 | n/a | KX865771 | 27.5482 | 97.3700 |
| *Y. rectangularis* (Tapparone-Canefri, 1889) | Myanmar: Ayeyarwady Basin, Mali Hka Basin, Nam Shu River | RMBH: biv 105/32 | KX865903 | n/a | KX865772 | 27.5482 | 97.3700 |
| *Y. rectangularis* (Tapparone-Canefri, 1889) | Myanmar: Ayeyarwady Basin, Mole Stream | RMBH: biv 916/1 | OL597635 | ON142664 | OL598387 | 24.4010 | 97.2544 |
| *Y. rectangularis* (Tapparone-Canefri, 1889) | Myanmar: Ayeyarwady Basin, Mole Stream | RMBH: biv 916/2 | OL597636 | ON142665 | OL598388 | 24.4010 | 97.2544 |
| *Y. rectangularis* (Tapparone-Canefri, 1889) | Myanmar: Ayeyarwady Basin, Mole Stream | RMBH: biv 916/3 | OL597637 | n/a | n/a | 24.4010 | 97.2544 |
| *Y. rectangularis* (Tapparone-Canefri, 1889) | Myanmar: Ayeyarwady Basin, Mole Stream | RMBH: biv 917/1 | OL597638 | ON142666 | OL598389 | 24.4010 | 97.2544 |
| *Y. rectangularis* (Tapparone-Canefri, 1889) | Myanmar: Ayeyarwady Basin, Indaw River | RMBH: biv 937/1 | OL597639 | n/a | n/a | 25.5274 | 96.7189 |
| *Y. rectangularis* (Tapparone-Canefri, 1889) | Myanmar: Ayeyarwady Basin, Indaw River | RMBH: biv 937/2 | OL597640 | n/a | n/a | 25.5274 | 96.7189 |
| *Y. rectangularis* (Tapparone-Canefri, 1889) | Myanmar: Ayeyarwady Basin, Indaw River | RMBH: biv 937/3 | OL597641 | n/a | n/a | 25.5274 | 96.7189 |
| *Y. rectangularis* (Tapparone-Canefri, 1889) | Myanmar: Ayeyarwady Basin, Mogaung River | RMBH: biv 961/1 | OL597642 | n/a | n/a | 25.3151 | 96.9326 |
| *Y. rectangularis* (Tapparone-Canefri, 1889) | Myanmar: Ayeyarwady Basin, Mogaung River | RMBH: biv 961/2 | OL597643 | n/a | n/a | 25.3151 | 96.9326 |
| *Y. rectangularis* (Tapparone-Canefri, 1889) | Myanmar: Ayeyarwady Basin, Mogaung River | RMBH: biv 961/3 | OL597644 | n/a | n/a | 25.3151 | 96.9326 |
| *Y. rectangularis* (Tapparone-Canefri, 1889) | Myanmar: Ayeyarwady Basin, Mogaung River | RMBH: biv 964/1 | OL597645 | n/a | n/a | 25.3151 | 96.9326 |
| *Y. rectangularis* (Tapparone-Canefri, 1889) | Myanmar: Ayeyarwady Basin, Mogaung River | RMBH: biv 964/2 | OL597646 | n/a | n/a | 25.3151 | 96.9326 |
| *Y. rectangularis* (Tapparone-Canefri, 1889) | Myanmar: Ayeyarwady Basin, Mogaung River | RMBH: biv 964/3 | OL597647 | n/a | n/a | 25.3151 | 96.9326 |
| *Y. rectangularis* (Tapparone-Canefri, 1889) | Myanmar: Ayeyarwady Basin, Nantyin Stream | RMBH: biv 974/1 | OL597648 | n/a | n/a | 25.0271 | 96.6183 |
| *Y. rectangularis* (Tapparone-Canefri, 1889) | Myanmar: Ayeyarwady Basin, Nantyin Stream | RMBH: biv 974/2 | OL597649 | n/a | n/a | 25.0271 | 96.6183 |
| *Y. rectangularis* (Tapparone-Canefri, 1889) | Myanmar: Ayeyarwady Basin, Nantyin Stream | RMBH: biv 974/3 | OL597650 | n/a | n/a | 25.0271 | 96.6183 |
| *Y. rectangularis* (Tapparone-Canefri, 1889) | Myanmar: Ayeyarwady Basin, Nantyin Stream | RMBH: biv 976/1 | OL597651 | n/a | OL598390 | 25.0271 | 96.6183 |
| *Y. rectangularis* (Tapparone-Canefri, 1889) | Myanmar: Ayeyarwady Basin, Nantyin Stream | RMBH: biv 976/2 | OL597652 | n/a | OL598391 | 25.0271 | 96.6183 |
| *Y. rectangularis* (Tapparone-Canefri, 1889) | Myanmar: Ayeyarwady Basin, Nantyin Stream | RMBH: biv 976/3 | OL597653 | n/a | OL598392 | 25.0271 | 96.6183 |
| *Y. zayleymanensis* (Preston, 1912) | Myanmar: Ayeyarwady River near Mandalay | RMBH: biv 448/1 | OL597654 | n/a | OL598393 | 21.8893 | 95.9978 |
| *Y. zayleymanensis* (Preston, 1912) | Myanmar: Ayeyarwady River near Mandalay | RMBH: biv 448/2 | OL597655 | n/a | n/a | 21.8893 | 95.9978 |
| *Y. zayleymanensis* (Preston, 1912) | Myanmar: Ayeyarwady Basin, Bani River | RMBH: biv 665/1 | MN275073 | MN307260 | MN307202 | 19.3247 | 94.9839 |
| *Y. zayleymanensis* (Preston, 1912) | Myanmar: Ayeyarwady Basin, Bani River | RMBH: biv 665/3 | OL597656 | n/a | n/a | 19.3247 | 94.9839 |
| *Y. zayleymanensis* (Preston, 1912) | Myanmar: Ayeyarwady Basin, Bani River | RMBH: biv 666/6 | OL597657 | n/a | n/a | 19.3247 | 94.9839 |
| *Y. zayleymanensis* (Preston, 1912) | Myanmar: Ayeyarwady Basin, "small stream'' | RMBH: biv 679/1 | MN275074 | MN307261 | MN307203 | 25.2758 | 97.2722 |
| *Y. zayleymanensis* (Preston, 1912) | Myanmar: Ayeyarwady Basin, "small stream'' | RMBH: biv 679/2 | MN275075 | MN307262 | MN307204 | 25.2758 | 97.2722 |
| *Y. zayleymanensis* (Preston, 1912) | Myanmar: Ayeyarwady Basin, "small stream'' | RMBH: biv 679/3 | OL597658 | n/a | n/a | 25.2758 | 97.2722 |
| *Y. zayleymanensis* (Preston, 1912) | Myanmar: Ayeyarwady Basin, Lamon Chaung Stream | RMBH: biv 899/1 | OL597659 | n/a | n/a | 26.3463 | 96.6685 |
| *Y. zayleymanensis* (Preston, 1912) | Myanmar: Ayeyarwady Basin, Lamon Chaung Stream | RMBH: biv 899/2 | OL597660 | n/a | n/a | 26.3463 | 96.6685 |
| *Y. zayleymanensis* (Preston, 1912) | Myanmar: Ayeyarwady Basin, Mole Stream | RMBH: biv 917/2 | OL597661 | n/a | n/a | 24.4010 | 97.2544 |
| *Y. zayleymanensis* (Preston, 1912) | Myanmar: Ayeyarwady Basin, Mole Stream | RMBH: biv 917/3 | OL597662 | n/a | n/a | 24.4010 | 97.2544 |
| *Y. zayleymanensis* (Preston, 1912) | Myanmar: Ayeyarwady Basin, Mole Stream | RMBH: biv 918/1 | OL597663 | n/a | n/a | 24.4010 | 97.2544 |
| *Y. zayleymanensis* (Preston, 1912) | Myanmar: Ayeyarwady Basin, Mole Stream | RMBH: biv 918/2 | OL597664 | n/a | n/a | 24.4010 | 97.2544 |
| *Y. zayleymanensis* (Preston, 1912) | Myanmar: Ayeyarwady Basin, Mole Stream | RMBH: biv 918/3 | OL597665 | n/a | n/a | 24.4010 | 97.2544 |
| *Y. zayleymanensis* (Preston, 1912) | Myanmar: Ayeyarwady Basin, Mogaung River | RMBH: biv 963/1 | OL597666 | n/a | n/a | 25.3151 | 96.9326 |
| *Y. zayleymanensis* (Preston, 1912) | Myanmar: Ayeyarwady Basin, Mogaung River | RMBH: biv 963/2 | OL597667 | n/a | n/a | 25.3151 | 96.9326 |
| *Y. zayleymanensis* (Preston, 1912) | Myanmar: Ayeyarwady Basin, Mogaung River | RMBH: biv 963/3 | OL597668 | n/a | n/a | 25.3151 | 96.9326 |
| *Y.* *elongatula* Bolotov et al., 2019 | Myanmar: Ayeyarwady Basin, Chindwin River | RMBH: biv 346/1 | MK372406 | MK372454 | MK372484 | 23.1918 | 94.3217 |
| *Y.* *elongatula* Bolotov et al., 2019 | Myanmar: Ayeyarwady Basin, Chindwin River | RMBH: biv 346/2 | MK372407 | MK372455 | MK372485 | 23.1918 | 94.3217 |
| *Y.* *elongatula* Bolotov et al., 2019 | Myanmar: Ayeyarwady Basin, Chindwin River | RMBH: biv 346/3 | MK372408 | MK372456 | MK372486 | 23.1918 | 94.3217 |
| *Y.* *elongatula* Bolotov et al., 2019 | Myanmar: Ayeyarwady Basin, Myit Tha (Manipur) River | RMBH: biv 344/1 | MK372402 | n/a | n/a | 23.2006 | 94.2214 |
| *Y.* *elongatula* Bolotov et al., 2019 | Myanmar: Ayeyarwady Basin, Myit Tha (Manipur) River | RMBH: biv 344/3 | MK372403 | n/a | n/a | 23.2006 | 94.2214 |
| *Y.* *elongatula* Bolotov et al., 2019 | Myanmar: Ayeyarwady Basin, Myit Tha (Manipur) River | RMBH: biv 341/2 | MK372400 | MK372451 | MK372480 | 23.2448 | 94.1662 |
| *Y.* *elongatula* Bolotov et al., 2019 | Myanmar: Ayeyarwady Basin, Myit Tha (Manipur) River | RMBH: biv 341/3 | MK372401 | n/a | MK372481 | 23.2448 | 94.1662 |
| *Y.* *elongatula* Bolotov et al., 2019 | Myanmar: Ayeyarwady Basin, Myit Tha (Manipur) River | RMBH: biv 339/1 | MK372397 | n/a | MK372478 | 23.2285 | 94.1434 |
| *Y.* *elongatula* Bolotov et al., 2019 | Myanmar: Ayeyarwady Basin, Myit Tha (Manipur) River | RMBH: biv 339/2 | MK372398 | n/a | MK372479 | 23.2285 | 94.1434 |
| *Y.* *elongatula* Bolotov et al., 2019 | Myanmar: Ayeyarwady Basin, Myit Tha (Manipur) River | RMBH: biv 339/3 | MK372399 | n/a | n/a | 23.2285 | 94.1434 |
| *Y. baniensis* (Bolotov et al., 2020) | Myanmar: Ayeyarwady Basin, Bani River | RMBH: biv 666/1 | MN275076 | MN307263 | MN307205 | 19.3247 | 94.9839 |
| *Y. baniensis* (Bolotov et al., 2020) | Myanmar: Ayeyarwady Basin, Bani River | RMBH: biv 666/2 | MN275077 | MN307264 | MN307206 | 19.3247 | 94.9839 |
| *Y. baniensis* (Bolotov et al., 2020) | Myanmar: Ayeyarwady Basin, Bani River | RMBH: biv 666/3 | MN275078 | MN307265 | MN307207 | 19.3247 | 94.9839 |
| *Y. dalliana* (Frierson, 1913) | Myanmar: Ayeyarwady Basin, Lashio River | RMBH: biv 982/1 | OL741730 | OL763823 | OL763821 | 22.9965 | 97.8535 |
| *Y. dalliana* (Frierson, 1913) | Myanmar: Ayeyarwady Basin, Lashio River | RMBH: biv 982/2 | OL741731 | OL763824 | OL763822 | 22.9965 | 97.8535 |
| *Y. dalliana* (Frierson, 1913) | Myanmar: Ayeyarwady Basin, Lashio River | RMBH: biv 982/3 | OL741732 | n/a | n/a | 22.9965 | 97.8535 |
| **PARREYSIINAE Henderson, 1935** | | | | | | | |
| **Indochinellini Bolotov et al., 2018** | | | | | | | |
| **Indochinella Bolotov, Pfeiffer, Vikhrev, & Konopleva in Bolotov et al., 2018** | | | | | | | |
| *Indochinella pugio pugio* (Benson, 1862) | Myanmar: Ayeyarwady Basin, Lake Nant Phar | RMBH: biv 258/1 | MF352261 | MF352325 | MF352386 | 24.2972 | 97.2610 |
| *I. pugio pugio* (Benson, 1862) | Myanmar: Ayeyarwady Basin, Lake Nant Phar | RMBH: biv 258/2 | MF352262 | MF352326 | MF352389 | 24.2972 | 97.2610 |
| *I. pugio pugio* (Benson, 1862) | Myanmar: Ayeyarwady Basin, Lake Myaung | RMBH: biv 268/1 | MF352285 | n/a | n/a | 24.2387 | 97.1658 |
| *I. pugio pugio* (Benson, 1862) | Myanmar: Ayeyarwady Basin, Lake Myaung | RMBH: biv 268/2 | MF352286 | MF352346 | MF352403 | 24.2387 | 97.1658 |
| *I. pugio pugio* (Benson, 1862) | Myanmar: Ayeyarwady Basin, Lake Myaung | RMBH: biv 268/4 | MF352287 | MF352347 | MF352404 | 24.2387 | 97.1658 |
| *I. pugio pugio* (Benson, 1862) | Myanmar: Ayeyarwady Basin, Chindwin River, Pauk In Lake | UA 20739 | JN243899 | KP795046 | JN243879 | n/a | n/a |
| *I. pugio viridissima* Bolotov et al., 2019 | Myanmar: Sittaung Basin, Myit Kyi Pauk Stream | RMBH: biv 251/1 | MF352242 | MF352312 | MF352370 | 18.9613 | 96.4455 |
| *I. pugio viridissima* Bolotov et al., 2019 | Myanmar: Sittaung Basin, Myit Kyi Pauk Stream | RMBH: biv 251/2 | MF352243 | MF352313 | MF352371 | 18.9613 | 96.4455 |
| *I. pugio viridissima* Bolotov et al., 2019 | Myanmar: Sittaung Basin, Myit Kyi Pauk Stream | RMBH: biv 251/3 | MF352244 | MF352314 | MF352372 | 18.9613 | 96.4455 |
| *I. pugio viridissima* Bolotov et al., 2019 | Myanmar: Bilin River | RMBH: biv 371/1 | MK372426 | MK372468 | MK372500 | 17.3306 | 97.2418 |
| *I. pugio viridissima* Bolotov et al., 2019 | Myanmar: Bilin River | RMBH: biv 371/2 | MK372427 | MK372469 | MK372501 | 17.3306 | 97.2418 |
| *I. pugio viridissima* Bolotov et al., 2019 | Myanmar: Bilin River | RMBH: biv 371/3 | MK372428 | n/a | n/a | 17.3306 | 97.2418 |
| *I. pugio viridissima* Bolotov et al., 2019 | Myanmar: Bilin River | RMBH: biv 375/1 | MK372429 | n/a | n/a | 17.2757 | 97.1274 |
| *I. pugio viridissima* Bolotov et al., 2019 | Myanmar: Bilin River | RMBH: biv 375/2 | MK372430 | n/a | n/a | 17.2757 | 97.1274 |
| *I. pugio viridissima* Bolotov et al., 2019 | Myanmar: Bilin River | RMBH: biv 375/3 | MK372431 | n/a | n/a | 17.2757 | 97.1274 |
| *I. pugio viridissima* Bolotov et al., 2019 | Myanmar: Bilin River | RMBH: biv 377/2 | MK372432 | n/a | n/a | 17.5968 | 96.5950 |
| *I. pugio viridissima* Bolotov et al., 2019 | Myanmar: Bilin River | RMBH: biv 377/3 | MK372433 | n/a | n/a | 17.5968 | 96.5950 |
| *I. pugio viridissima* Bolotov et al., 2019 | Myanmar: Bago River | RMBH: biv 381/3 | MK372434 | n/a | n/a | 17.5334 | 96.3315 |
| *I. pugio viridissima* Bolotov et al., 2019 | Myanmar: Bago River | RMBH: biv 381/4 | MK372435 | n/a | n/a | 17.5334 | 96.3315 |
| *I. pugio daweiensis* Bolotov et al., 2019 | Myanmar: Dawei River | RMBH: biv 147/3 | KX865852 | KX865623 | KX865724 | 14.5013 | 98.1558 |
| *I. pugio daweiensis* Bolotov et al., 2019 | Myanmar: Dawei River | RMBH: biv 147/10 | KX865853 | KX865624 | KX865725 | 14.5013 | 98.1558 |
| *I. pugio daweiensis* Bolotov et al., 2019 | Myanmar: Dawei River | RMBH: biv 147/18 | KX865854 | KX865625 | KX865726 | 14.5013 | 98.1558 |
| *I. pugio daweiensis* Bolotov et al., 2019 | Myanmar: Dawei River | RMBH: biv 147/30 | MK372395 | n/a | n/a | 14.5013 | 98.1558 |
| *I. pugio daweiensis* Bolotov et al., 2019 | Myanmar: Dawei River | RMBH: biv 148/4 | KX865855 | KX865626 | KX865727 | 14.5013 | 98.1558 |
| *I. pugio daweiensis* Bolotov et al., 2019 | Myanmar: Dawei River | RMBH: biv 148/7 | KX865856 | KX865627 | KX865728 | 14.5013 | 98.1558 |
| *I. pugio daweiensis* Bolotov et al., 2019 | Myanmar: Dawei River | RMBH: biv 148/15 | KX865857 | KX865628 | KX865729 | 14.5013 | 98.1558 |
| *I. pugio paradoxa* Bolotov et al., 2019 | Myanmar: Haungthayaw River upStream of Kawkareik town | RMBH: biv 361/1 | MK372420 | MK372465 | MK372496 | 16.4714 | 98.2183 |
| *I. pugio paradoxa* Bolotov et al., 2019 | Myanmar: Haungthayaw River upStream of Kawkareik town | RMBH: biv 361/2 | MK372421 | MK372466 | MK372497 | 16.4714 | 98.2183 |
| *I. pugio paradoxa* Bolotov et al., 2019 | Myanmar: Haungthayaw River upStream of Kawkareik town | RMBH: biv 361/3 | MK372422 | MK372467 | MK372498 | 16.4714 | 98.2183 |
| ***Indonaia* Prashad, 1918** | | | | | | | |
| *Indonaia caerulea* (Lea, 1831) | India: Krishna Basin, fish pond | RRc1 | KT869141 | n/a | n/a | n/a | n/a |
| *I.* aff. *khadakvaslaensis* (Ray, 1966) | India | SBM7 | KF690124 | n/a | n/a | n/a | n/a |
| *I.* aff. *khadakvaslaensis* (Ray, 1966) | India | SBM19 | KF690122 | n/a | n/a | n/a | n/a |
| *I.* aff. *khadakvaslaensis* (Ray, 1966) | India | SBM23 | KF690123 | n/a | n/a | n/a | n/a |
| *I. lima* (Simpson, 1900) | India: Krishna River, Nagarjuna Sagar | RRl1 | KP268827 | n/a | n/a | n/a | n/a |
| *I. andersoniana* (Nevill, 1877) | Myanmar: Ayeyarwady Basin, Lake Indawgyi | RMBH: biv 108/1 | KX865835 | KX865606 | KX865709 | 25.1099 | 96.2925 |
| *I. andersoniana* (Nevill, 1877) | Myanmar: Ayeyarwady Basin, Lake Indawgyi | RMBH: biv 108/2 | KX865836 | KX865607 | n/a | 25.1099 | 96.2925 |
| *I. andersoniana* (Nevill, 1877) | Myanmar: Ayeyarwady Basin, Lake Indawgyi | RMBH: biv 108/3 | KX865837 | KX865608 | n/a | 25.1099 | 96.2925 |
| *I. andersoniana* (Nevill, 1877) | Myanmar: Ayeyarwady Basin, Lake Nant Phar | RMBH: biv 259/1 | MF352263 | MF352327 | MF352387 | 24.2972 | 97.2610 |
| *I. andersoniana* (Nevill, 1877) | Myanmar: Ayeyarwady Basin, Lake Nant Phar | RMBH: biv 259/3 | MF352264 | MF352328 | n/a | 24.2972 | 97.2610 |
| *I. andersoniana* (Nevill, 1877) | Myanmar: Ayeyarwady Basin, Lake Nant Phar | RMBH: biv 259/4 | MF352265 | MF352329 | MF352388 | 24.2972 | 97.2610 |
| *I. andersoniana* (Nevill, 1877) | Myanmar: Ayeyarwady Basin, Lake Nant Phar | RMBH: biv 263/1 | MF352275 | MF352337 | MF352397 | 24.2196 | 97.2224 |
| *I. andersoniana* (Nevill, 1877) | Myanmar: Ayeyarwady Basin, Nant Sa Yi River | RMBH: biv 263/2 | MF352276 | MF352338 | n/a | 24.2196 | 97.2224 |
| *I. andersoniana* (Nevill, 1877) | Myanmar: Ayeyarwady Basin, Lake Myaung | RMBH: biv 267/1 | MF352283 | MF352341 | n/a | 24.2387 | 97.1658 |
| *I. andersoniana* (Nevill, 1877) | Myanmar: Ayeyarwady Basin, Lake Myaung | RMBH: biv 267/3 | MF352284 | MF352342 | n/a | 24.2387 | 97.1658 |
| *I. andersoniana* (Nevill, 1877) | Myanmar: Salween Basin, Mizan Stream | RMBH: biv 368/1 | OL597669 | OL598373 | OL598394 | 16.9770 | 97.6330 |
| *I. andersoniana* (Nevill, 1877) | Myanmar: Salween Basin, Mizan Stream | RMBH: biv 368/2 | OL597670 | n/a | n/a | 16.9770 | 97.6330 |
| *I. andersoniana* (Nevill, 1877) | Myanmar: Salween Basin, Mizan Stream | RMBH: biv 368/3 | OL597671 | n/a | n/a | 16.9770 | 97.6330 |
| *I. andersoniana* (Nevill, 1877) | Myanmar: Bago River | RMBH: biv 383/1 | OL597672 | n/a | n/a | 17.5334 | 96.3315 |
| *I. andersoniana* (Nevill, 1877) | Myanmar: Bago River | RMBH: biv 383/2 | OL597673 | n/a | n/a | 17.5334 | 96.3315 |
| *I. andersoniana* (Nevill, 1877) | Myanmar: Bago River | RMBH: biv 383/3 | OL597674 | n/a | n/a | 17.5334 | 96.3315 |
| *I. andersoniana* (Nevill, 1877) | Myanmar: Bago River | RMBH: biv 389/1 | OL597675 | n/a | n/a | 17.6795 | 96.2347 |
| *I. andersoniana* (Nevill, 1877) | Myanmar: Bago River | RMBH: biv 389/2 | OL597676 | n/a | n/a | 17.6795 | 96.2347 |
| *I. andersoniana* (Nevill, 1877) | Myanmar: Bago River | RMBH: biv 389/3 | OL597677 | n/a | n/a | 17.6795 | 96.2347 |
| *I. andersoniana* (Nevill, 1877) | Myanmar: Salween Basin, Balu River near Loikaw | RMBH: biv 405A/1 | OL597678 | n/a | n/a | 19.6682 | 97.1848 |
| *I. andersoniana* (Nevill, 1877) | Myanmar: Salween Basin, Balu River near Loikaw | RMBH: biv 405A/2 | OL597679 | n/a | n/a | 19.6682 | 97.1848 |
| *I. andersoniana* (Nevill, 1877) | Myanmar: Salween Basin, Balu River near Loikaw | RMBH: biv 405A/3 | OL597680 | n/a | n/a | 19.6682 | 97.1848 |
| *I. andersoniana* (Nevill, 1877) | Myanmar: Sittaung Basin, Hnit Saung Pyang Stream | RMBH: biv 407/1 | OL597681 | n/a | n/a | 19.5140 | 96.2621 |
| *I. andersoniana* (Nevill, 1877) | Myanmar: Sittaung Basin, Hnit Saung Pyang Stream | RMBH: biv 407/2 | OL597682 | n/a | n/a | 19.5140 | 96.2621 |
| *I. andersoniana* (Nevill, 1877) | Myanmar: Sittaung Basin, Hnit Saung Pyang Stream | RMBH: biv 407/3 | OL597683 | n/a | n/a | 19.5140 | 96.2621 |
| *I. andersoniana* (Nevill, 1877) | Myanmar: Salween Basin, Balu River near Loikaw | RMBH: biv 407A/1 | OL597684 | n/a | n/a | 19.6682 | 97.1848 |
| *I. andersoniana* (Nevill, 1877) | Myanmar: Salween Basin, Balu River near Loikaw | RMBH: biv 407A/2 | OL597685 | n/a | n/a | 19.6682 | 97.1848 |
| *I. andersoniana* (Nevill, 1877) | Myanmar: Sittaung Basin, Sin Thay Stream | RMBH: biv 412/1 | OL597686 | n/a | n/a | 20.1533 | 96.1267 |
| *I. andersoniana* (Nevill, 1877) | Myanmar: Sittaung Basin, Sin Thay Stream | RMBH: biv 412/2 | OL597687 | n/a | n/a | 20.1533 | 96.1267 |
| *I. andersoniana* (Nevill, 1877) | Myanmar: Sittaung Basin, Sin Thay Stream | RMBH: biv 412/3 | OL597688 | n/a | n/a | 20.1533 | 96.1267 |
| *I. andersoniana* (Nevill, 1877) | Myanmar: Ayeyarwady Basin, Mone Ding Dam outlet | RMBH: biv 414/1 | OL597689 | n/a | n/a | 20.8099 | 95.7242 |
| *I. andersoniana* (Nevill, 1877) | Myanmar: Ayeyarwady Basin, Mone Ding Dam outlet | RMBH: biv 414/2 | OL597690 | n/a | n/a | 20.8099 | 95.7242 |
| *I. andersoniana* (Nevill, 1877) | Myanmar: Ayeyarwady Basin, Mone Ding Dam outlet | RMBH: biv 414/3 | OL597691 | n/a | n/a | 20.8099 | 95.7242 |
| *I. andersoniana* (Nevill, 1877) | Myanmar: Ayeyarwady Basin, ox-bow lake near Ta Naung Taig village | RMBH: biv 429/1 | OL597692 | n/a | n/a | 21.4064 | 95.3399 |
| *I. andersoniana* (Nevill, 1877) | Myanmar: Ayeyarwady Basin, ox-bow lake near Ta Naung Taig village | RMBH: biv 429/2 | OL597693 | n/a | n/a | 21.4064 | 95.3399 |
| *I. andersoniana* (Nevill, 1877) | Myanmar: Ayeyarwady Basin, ox-bow lake near Ta Naung Taig village | RMBH: biv 429/3 | OL597694 | n/a | n/a | 21.4064 | 95.3399 |
| *I. andersoniana* (Nevill, 1877) | Myanmar: Ayeyarwady River near Mandalay | RMBH: biv 434 | OL597695 | n/a | n/a | 21.9574 | 96.0510 |
| *I. andersoniana* (Nevill, 1877) | Myanmar: Ayeyarwady River near Mandalay | RMBH: biv 450/1 | OL597696 | n/a | n/a | 21.8893 | 95.9978 |
| *I. andersoniana* (Nevill, 1877) | Myanmar: Ayeyarwady River near Mandalay | RMBH: biv 450/2 | OL597697 | n/a | n/a | 21.8893 | 95.9978 |
| *I. andersoniana* (Nevill, 1877) | Myanmar: Ayeyarwady Basin, Indaw River near Sell Ywar village | RMBH: biv 615/1 | OL597698 | n/a | n/a | 24.2123 | 96.0819 |
| *I. andersoniana* (Nevill, 1877) | Myanmar: Ayeyarwady Basin, Indaw River near Sell Ywar village | RMBH: biv 615/2 | OL597699 | n/a | n/a | 24.2123 | 96.0819 |
| *I. andersoniana* (Nevill, 1877) | Myanmar: Bago River | RMBH: biv 1005/1 | OL597700 | ON142667 | n/a | 18.0791 | 96.0449 |
| *I. andersoniana* (Nevill, 1877) | Myanmar: Bago River | RMBH: biv 1005/2 | OL597701 | ON142668 | n/a | 18.0791 | 96.0449 |
| *I. andersoniana* (Nevill, 1877) | Myanmar: Bago River | RMBH: biv 1005/3 | OL597702 | ON142669 | n/a | 18.0791 | 96.0449 |
| *I. subclathrata* (Martens, 1899) | Myanmar: Ayeyarwady Basin, Myit Tha (Manipur) River | RMBH: biv 338/1 | MH700479 | n/a | n/a | 23.2285 | 94.1434 |
| *I. subclathrata* (Martens, 1899) | Myanmar: Ayeyarwady Basin, Myit Tha (Manipur) River | RMBH: biv 338/2 | OL597703 | n/a | n/a | 23.2285 | 94.1434 |
| *I. subclathrata* (Martens, 1899) | Myanmar: Ayeyarwady Basin, Myit Tha (Manipur) River | RMBH: biv 338/3 | OL597704 | n/a | n/a | 23.2285 | 94.1434 |
| *I. subclathrata* (Martens, 1899) | Myanmar: Ayeyarwady Basin, Chindwin River | RMBH: biv 347/1 | MH700480 | MN307266 | MH697870 | 23.1918 | 94.3217 |
| *I. subclathrata* (Martens, 1899) | Myanmar: Ayeyarwady Basin, Chindwin River | RMBH: biv 347/2 | MN275079 | n/a | MN307208 | 23.1918 | 94.3217 |
| *I. subclathrata* (Martens, 1899) | Myanmar: Bani River | RMBH: biv 667/1 | MN275080 | n/a | n/a | 19.3247 | 94.9839 |
| *I. subclathrata* (Martens, 1899) | Myanmar: Bani River | RMBH: biv 667/2 | OL597705 | n/a | n/a | 19.3247 | 94.9839 |
| ***Radiatula* Simpson, 1900** | | | | | | | |
| *Radiatula mouhoti* Vikhrev, Bolotov & Konopleva, 2017 | Myanmar: Sittaung River near Taungoo | RMBH: biv 248/1 | MF352234 | MF352305 | MF352363 | 18.9840 | 96.4361 |
| *R. mouhoti* Vikhrev, Bolotov & Konopleva, 2017 | Myanmar: Sittaung River near Taungoo | RMBH: biv 248/3 | MF352235 | n/a | n/a | 18.9840 | 96.4361 |
| *R. mouhoti* Vikhrev, Bolotov & Konopleva, 2017 | Myanmar: Sittaung River near Taungoo | RMBH: biv 248/4 | MF352236 | MF352306 | MF352364 | 18.9840 | 96.4361 |
| *R. mouhoti* Vikhrev, Bolotov & Konopleva, 2017 | Myanmar: Sittaung River near Taungoo | RMBH: biv 253/1 | MF352248 | MF352317 | MF352375 | 18.9840 | 96.4361 |
| *R. mouhoti* Vikhrev, Bolotov & Konopleva, 2017 | Myanmar: Sittaung River near Taungoo | RMBH: biv 253/6 | MF352249 | MF352318 | MF352376 | 18.9840 | 96.4361 |
| *R. mouhoti* Vikhrev, Bolotov & Konopleva, 2017 | Myanmar: Sittaung River near Taungoo | RMBH: biv 256 | MF352257 | MF352321 | MF352382 | 18.9840 | 96.4361 |
| *R. mouhoti* Vikhrev, Bolotov & Konopleva, 2017 | Myanmar: Sittaung River near Kanna village | RMBH: biv 409/2 | OL597706 | n/a | n/a | 19.4857 | 96.2750 |
| *R. mouhoti* Vikhrev, Bolotov & Konopleva, 2017 | Myanmar: Sittaung River near Kanna village | RMBH: biv 409/3 | OL597707 | n/a | n/a | 19.4857 | 96.2750 |
| *R. mouhoti* Vikhrev, Bolotov & Konopleva, 2017 | Myanmar: Sittaung River near Swanka Doe Seik village | RMBH: biv 410/1 | OL597708 | n/a | n/a | 19.2830 | 96.3107 |
| *R. mouhoti* Vikhrev, Bolotov & Konopleva, 2017 | Myanmar: Sittaung River near Swanka Doe Seik village | RMBH: biv 410/2 | OL597709 | n/a | n/a | 19.2830 | 96.3107 |
| *R. mouhoti* Vikhrev, Bolotov & Konopleva, 2017 | Myanmar: Sittaung River near Swanka Doe Seik village | RMBH: biv 410/3 | OL597710 | n/a | n/a | 19.2830 | 96.3107 |
| *R. mouhoti* Vikhrev, Bolotov & Konopleva, 2017 | Myanmar: Sittaung Basin, Thaing Stream | RMBH: biv 411/1 | OL597711 | n/a | n/a | 19.2187 | 96.2229 |
| *R. mouhoti* Vikhrev, Bolotov & Konopleva, 2017 | Myanmar: Sittaung Basin, Thaing Stream | RMBH: biv 411/2 | OL597712 | n/a | n/a | 19.2187 | 96.2229 |
| *R. mouhoti haungthayawensis* Bolotov et al., 2019 | Myanmar: Haungthayaw River upstream of Kawkareik town | RMBH: biv 360/1 | MK372417 | MK372463 | MK372493 | 16.4714 | 98.2183 |
| *R. mouhoti haungthayawensis* Bolotov et al., 2019 | Myanmar: Haungthayaw River upstream of Kawkareik town | RMBH: biv 360/2 | MK372418 | MK372464 | MK372494 | 16.4714 | 98.2183 |
| *R. mouhoti haungthayawensis* Bolotov et al., 2019 | Myanmar: Haungthayaw River upstream of Kawkareik town | RMBH: biv 360/3 | MK372419 | n/a | MK372495 | 16.4714 | 98.2183 |
| *R. mouhoti haungthayawensis* Bolotov et al., 2019 | Myanmar: Haungthayaw Basin, Mitan Stream | RMBH: biv 1023/1 | OL597713 | n/a | n/a | 16.0019 | 98.4064 |
| *R. mouhoti haungthayawensis* Bolotov et al., 2019 | Myanmar: Haungthayaw Basin, Mitan Stream | RMBH: biv 1023/2 | OL597714 | OL598374 | n/a | 16.0019 | 98.4064 |
| *R. mouhoti haungthayawensis* Bolotov et al., 2019 | Myanmar: Haungthayaw Basin, Mitan Stream | RMBH: biv 1023/3 | OL597715 | n/a | n/a | 16.0019 | 98.4064 |
| *R. chaudhurii* (Preston, 1912) | Myanmar: Ayeyarwady Basin, Tar Pein River | RMBH: biv 260/5 | MF352266 | MF352330 | MF352390 | 24.3049 | 97.2514 |
| *R. chaudhurii* (Preston, 1912) | Myanmar: Ayeyarwady Basin, Tar Pein River | RMBH: biv 260/9 | MF352267 | MF352331 | MF352391 | 24.3049 | 97.2514 |
| *R. chaudhurii* (Preston, 1912) | Myanmar: Ayeyarwady Basin, Tar Pein River | RMBH: biv 260/10 | MF352268 | MF352332 | MF352392 | 24.3049 | 97.2514 |
| *R. chaudhurii* (Preston, 1912) | Myanmar: Ayeyarwady Basin, midstream near Thin Baw Kone village | RMBH: biv 421/2 | MK372439 | MK372471 | MK372503 | 21.3145 | 95.0589 |
| *R. chaudhurii* (Preston, 1912) | Myanmar: Ayeyarwady Basin, midstream near Thin Baw Kone village | RMBH: biv 421/3 | MK372440 | MK372472 | MK372504 | 21.3145 | 95.0589 |
| *R. chaudhurii* (Preston, 1912) | Myanmar: Ayeyarwady Basin, midstream near Thin Baw Kone village | RMBH: biv 427/1 | MK372444 | n/a | n/a | 21.2566 | 94.9848 |
| *R. chaudhurii* (Preston, 1912) | Myanmar: Ayeyarwady Basin, midstream near Thin Baw Kone village | RMBH: biv 427/2 | MK372445 | n/a | n/a | 21.2566 | 94.9848 |
| *R. chaudhurii* (Preston, 1912) | Myanmar: Ayeyarwady Basin, Lake Indaw | RMBH: biv 604/1 | OL597716 | n/a | n/a | 24.2665 | 96.1228 |
| *R. chaudhurii* (Preston, 1912) | Myanmar: Ayeyarwady Basin, Lake Indaw | RMBH: biv 604/2 | OL597717 | n/a | n/a | 24.2665 | 96.1228 |
| *R. chaudhurii* (Preston, 1912) | Myanmar: Ayeyarwady Basin, Lake Indaw | RMBH: biv 605/1 | OL597718 | n/a | n/a | 24.2665 | 96.1228 |
| *R. chaudhurii* (Preston, 1912) | Myanmar: Ayeyarwady Basin, Lake Indaw | RMBH: biv 605/2 | OL597719 | n/a | n/a | 24.2665 | 96.1228 |
| *R. chaudhurii* (Preston, 1912) | Myanmar: Ayeyarwady Basin, Lake Indaw | RMBH: biv 605/3 | OL597720 | n/a | n/a | 24.2665 | 96.1228 |
| *R. chaudhurii* (Preston, 1912) | Myanmar: Ayeyarwady Basin, Lake Indaw | RMBH: biv 606/2 | OL597721 | n/a | n/a | 24.2665 | 96.1228 |
| *R. chaudhurii* (Preston, 1912) | Myanmar: Ayeyarwady Basin, Nant Poat Kalay River | RMBH: biv 610/1 | OL597722 | n/a | n/a | 24.2130 | 96.1089 |
| *R. chaudhurii* (Preston, 1912) | Myanmar: Ayeyarwady Basin, Nant Poat Kalay River | RMBH: biv 610/2 | OL597723 | n/a | n/a | 24.2130 | 96.1089 |
| *R. chaudhurii* (Preston, 1912) | Myanmar: Ayeyarwady Basin, Nant Poat Kalay River | RMBH: biv 611/1 | OL597724 | n/a | n/a | 24.2130 | 96.1089 |
| *R. chaudhurii* (Preston, 1912) | Myanmar: Ayeyarwady Basin, Nant Poat Kalay River | RMBH: biv 611/2 | OL597725 | n/a | n/a | 24.2130 | 96.1089 |
| *R. chaudhurii* (Preston, 1912) | Myanmar: Ayeyarwady Basin, Lake Indaw | RMBH: biv 614/1 | OL597726 | n/a | n/a | 24.2123 | 96.0819 |
| *R. chaudhurii* (Preston, 1912) | Myanmar: Ayeyarwady Basin, Lake Indaw | RMBH: biv 614/2 | OL597727 | n/a | n/a | 24.2123 | 96.0819 |
| *R. chaudhurii* (Preston, 1912) | Myanmar: Ayeyarwady Basin, Shweli River | RMBH: biv 913/1 | OL597728 | n/a | n/a | 24.0171 | 96.4729 |
| *R. chaudhurii* (Preston, 1912) | Myanmar: Ayeyarwady Basin, Shweli River | RMBH: biv 913/2 | OL597729 | n/a | n/a | 24.0171 | 96.4729 |
| *R. chaudhurii* (Preston, 1912) | Myanmar: Ayeyarwady Basin, Shweli River | RMBH: biv 913/3 | OL597730 | n/a | n/a | 24.0171 | 96.4729 |
| *R. chaudhurii* (Preston, 1912) | Myanmar: Ayeyarwady Basin, Mole Stream | RMBH: biv 920/1 | OL597731 | OL598375 | n/a | 24.4010 | 97.2544 |
| *R. chaudhurii* (Preston, 1912) | Myanmar: Ayeyarwady Basin, Mole Stream | RMBH: biv 920/2 | OL597732 | n/a | n/a | 24.4010 | 97.2544 |
| *R. chaudhurii* (Preston, 1912) | Myanmar: Ayeyarwady Basin, Mole Stream | RMBH: biv 920/3 | OL597733 | n/a | n/a | 24.4010 | 97.2544 |
| *R. chaudhurii* (Preston, 1912) | Myanmar: Ayeyarwady Basin, Mole Stream | RMBH: biv 921/1 | OL597734 | OL598376 | n/a | 24.4010 | 97.2544 |
| *R. chaudhurii* (Preston, 1912) | Myanmar: Ayeyarwady Basin, Mole Stream | RMBH: biv 921/2 | OL597735 | n/a | n/a | 24.4010 | 97.2544 |
| *R. chaudhurii* (Preston, 1912) | Myanmar: Ayeyarwady Basin, Mole Stream | RMBH: biv 921/3 | OL597736 | n/a | n/a | 24.4010 | 97.2544 |
| *R. myitkyinae* (Prashad, 1930) | Myanmar: Ayeyarwady Basin, Lake Indawgyi | RMBH: biv 107/1 | KX865838 | KX865609 | KX865710 | 25.1099 | 96.2925 |
| *R. myitkyinae* (Prashad, 1930) | Myanmar: Ayeyarwady Basin, Lake Indawgyi | RMBH: biv 107/2 | KX865839 | KX865610 | KX865711 | 25.1099 | 96.2925 |
| *R. myitkyinae* (Prashad, 1930) | Myanmar: Ayeyarwady Basin, Lake Indawgyi | RMBH: biv 107/3 | KX865840 | KX865611 | KX865712 | 25.1099 | 96.2925 |
| *R. myitkyinae* (Prashad, 1930) | Myanmar: Ayeyarwady Basin, Lake Indawgyi | RMBH: biv 106/1 | KX865841 | KX865612 | KX865713 | 25.1099 | 96.2925 |
| *R. myitkyinae* (Prashad, 1930) | Myanmar: Ayeyarwady Basin, Lake Indawgyi | RMBH: biv 106/2 | KX865843 | KX865613 | KX865715 | 25.1099 | 96.2925 |
| *R. myitkyinae* (Prashad, 1930) | Myanmar: Ayeyarwady Basin, Lake Indawgyi | RMBH: biv 106/3 | KX865842 | KX865614 | KX865714 | 25.1099 | 96.2925 |
| *R. myitkyinae* (Prashad, 1930) | Myanmar: Ayeyarwady Basin, Mogaung River | RMBH: biv 971/1 | OL597737 | n/a | n/a | 25.3151 | 96.9326 |
| *R. myitkyinae* (Prashad, 1930) | Myanmar: Ayeyarwady Basin, Mogaung River | RMBH: biv 971/2 | OL597738 | n/a | n/a | 25.3151 | 96.9326 |
| *R. myitkyinae* (Prashad, 1930) | Myanmar: Ayeyarwady Basin, Mogaung River | RMBH: biv 971/3 | OL597739 | n/a | n/a | 25.3151 | 96.9326 |
| *R. crispisulcata* (Benson, 1862) | Myanmar: Ayeyarwady Basin, Nga Wun River | RMBH: biv 671/1 | MN275081 | MN307267 | MN307209 | 18.8624 | 95.2822 |
| *R. crispisulcata* (Benson, 1862) | Myanmar: Ayeyarwady Basin, Nga Wun River | RMBH: biv 671/2 | MN275082 | MN307268 | MN307210 | 18.8624 | 95.2822 |
| *R. crispisulcata* (Benson, 1862) | Myanmar: Ayeyarwady Basin, Nga Wun River | RMBH: biv 671/3 | MN275083 | MN307269 | MN307211 | 18.8624 | 95.2822 |
| *R. chindwinensis* Bolotov et al., 2019 | Myanmar: Ayeyarwady Basin, Myit Tha (Manipur) River | RMBH: biv 345/1 | MK372404 | MK372452 | MK372482 | 23.2006 | 94.2214 |
| *R. chindwinensis* Bolotov et al., 2019 | Myanmar: Ayeyarwady Basin, Myit Tha (Manipur) River | RMBH: biv 345/2 | MK372405 | MK372453 | MK372483 | 23.2006 | 94.2214 |
| *R. chindwinensis* Bolotov et al., 2019 | Myanmar: Ayeyarwady Basin, Chindwin River | RMBH: biv 348/2 | MK372410 | MK372458 | MK372488 | 23.1918 | 94.3217 |
| *R. chindwinensis* Bolotov et al., 2019 | Myanmar: Ayeyarwady Basin, tributary of Nay Chin Sayar River | RMBH: biv 357/1 | MK372414 | MK372462 | MK372492 | 23.4160 | 94.0875 |
| *R. chindwinensis* Bolotov et al., 2019 | Myanmar: Ayeyarwady Basin, tributary of Nay Chin Sayar River | RMBH: biv 357/2 | MK372415 | n/a | n/a | 23.4160 | 94.0875 |
| *R. chindwinensis* Bolotov et al., 2019 | Myanmar: Ayeyarwady Basin, tributary of Nay Chin Sayar River | RMBH: biv 357/3 | MK372416 | n/a | n/a | 23.4160 | 94.0875 |
| *R. myitthanensis* Bolotov et al., 2019 | Myanmar: Ayeyarwady Basin, Myit Tha (Manipur) River | RMBH biv 337/3 | MK372396 | MK372450 | MK372477 | 23.2285 | 94.1434 |
| *R. myitthanensis* Bolotov et al., 2019 | Myanmar: Ayeyarwady Basin, Chindwin River | RMBH biv 348/1 | MK372409 | MK372457 | MK372487 | 23.1918 | 94.3217 |
| **Lamellidentini Modell, 1942** | | | | | | | |
| ***Trapezidens* Bolotov, Vikhrev & Konopleva in Bolotov et al., 2017** | | | | | | | |
| *Trapezidens exolescens* (Gould, 1843) | Myanmar: Dawei River | RMBH: biv 145/3 | KX230532 | KX230548 | KX230559 | 14.5013 | 98.1558 |
| *T. exolescens* (Gould, 1843) | Myanmar: Dawei River | RMBH: biv 145/12 | KX230535 | KX230549 | KX230560 | 14.5013 | 98.1558 |
| *T. exolescens* (Gould, 1843) | Myanmar: Dawei River | RMBH: biv 145/21 | KX230536 | KX230550 | KX230561 | 14.5013 | 98.1558 |
| *T. exolescens* (Gould, 1843) | Myanmar: Dawei River | RMBH: biv 146/2 | KX230537 | KX230551 | KX230562 | 14.5013 | 98.1558 |
| *T. exolescens* (Gould, 1843) | Myanmar: Dawei River | RMBH: biv 146/11 | KX230539 | n/a | n/a | 14.5013 | 98.1558 |
| *T. exolescens* (Gould, 1843) | Myanmar: Dawei River | RMBH: biv 146/14 | KX230540 | KX230552 | KX230563 | 14.5013 | 98.1558 |
| *T. exolescens* (Gould, 1843) | Myanmar: Dawei River | RMBH: biv 146/23 | KX230542 | KX230542 | KX230564 | 14.5013 | 98.1558 |
| *T. scutum* (Sowerby, 1868) | Myanmar: Tanintharyi Basin, Nga Wun River | RMBH: biv 630/1 | MN275084 | MN307270 | MN307212 | 11.8567 | 99.1181 |
| *T. scutum* (Sowerby, 1868) | Myanmar: Tanintharyi Basin, Nga Wun River | RMBH: biv 630/2 | MN275085 | MN307271 | MN307213 | 11.8567 | 99.1181 |
| *T. scutum* (Sowerby, 1868) | Myanmar: Tanintharyi Basin, Nga Wun River | RMBH: biv 632/1 | MN275086 | MN307272 | MN307214 | 11.8567 | 99.1181 |
| *T. scutum* (Sowerby, 1868) | Myanmar: Tanintharyi Basin, Nga Wun River | RMBH: biv 632/2 | MN780892 | n/a | n/a | 11.8567 | 99.1181 |
| *T. scutum* (Sowerby, 1868) | Myanmar: Tanintharyi Basin, Nga Wun Stream | RMBH: biv 644 | MN780893 | n/a | n/a | 11.8233 | 99.1493 |
| *T. scutum* (Sowerby, 1868) | Myanmar: Tanintharyi Basin, Nga Wun Stream | RMBH: biv 645/1 | MN780894 | n/a | n/a | 11.8233 | 99.1493 |
| *T. angustior* (Hanley & Theobald, 1876) | Myanmar: Sittaung Basin, Myit Kyi Pauk Stream | RMBH: biv 250/4 | MF352238 | MF352308 | MF352366 | 18.9613 | 96.4455 |
| *T. angustior* (Hanley & Theobald, 1876) | Myanmar: Sittaung Basin, Myit Kyi Pauk Stream | RMBH: biv 250/7 | MF352239 | MF352309 | MF352367 | 18.9613 | 96.4455 |
| *T. angustior* (Hanley & Theobald, 1876) | Myanmar: Sittaung Basin, Myit Kyi Pauk Stream | RMBH: biv 250/8 | MF352240 | MF352310 | MF352310 | 18.9613 | 96.4455 |
| *T. angustior* (Hanley & Theobald, 1876) | Myanmar: Sittaung Basin, Thauk Ye Kupt River | RMBH: biv 255/1 | MF352253 | MF352320 | MF352378 | 18.9840 | 96.4361 |
| *T. angustior* (Hanley & Theobald, 1876) | Myanmar: Bilin River | RMBH: biv 370/1 | MN275087 | MN307273 | MN307215 | 17.3306 | 97.2418 |
| *T. angustior* (Hanley & Theobald, 1876) | Myanmar: Bilin River | RMBH: biv 370/2 | MN780875 | n/a | n/a | 17.3306 | 97.2418 |
| *T. angustior* (Hanley & Theobald, 1876) | Myanmar: Bilin River | RMBH: biv 370/3 | MN780876 | n/a | n/a | 17.3306 | 97.2418 |
| *T. angustior* (Hanley & Theobald, 1876) | Myanmar: Bago River | RMBH: biv 382/1 | MN780877 | n/a | n/a | 17.9769 | 96.7659 |
| *T. angustior* (Hanley & Theobald, 1876) | Myanmar: Bago River | RMBH: biv 382/2 | MN780878 | n/a | n/a | 17.9769 | 96.7659 |
| *T. angustior* (Hanley & Theobald, 1876) | Myanmar: Bago River | RMBH: biv 382/3 | MN780879 | n/a | n/a | 17.5334 | 96.3315 |
| *T. angustior* (Hanley & Theobald, 1876) | Myanmar: Bago Basin, Moload Stream | RMBH: biv 385/1 | MN780880 | n/a | n/a | 17.5334 | 96.3315 |
| *T. angustior* (Hanley & Theobald, 1876) | Myanmar: Bago Basin, Kyak Phar Stream | RMBH: biv 387/3 | MN780881 | n/a | n/a | 17.5334 | 96.3315 |
| *T. angustior* (Hanley & Theobald, 1876) | Myanmar: Bago Basin, Kyak Phar Stream | RMBH: biv 388/1 | MN780882 | n/a | n/a | 17.6011 | 96.2861 |
| *T. angustior* (Hanley & Theobald, 1876) | Myanmar: Bago Basin, Kyak Phar Stream | RMBH: biv 388/2 | MN780883 | n/a | n/a | 17.6660 | 96.2465 |
| *T. angustior* (Hanley & Theobald, 1876) | Myanmar: Bago Basin, Kyak Phar Stream | RMBH: biv 388/3 | MN780884 | n/a | n/a | 17.6660 | 96.2465 |
| *T. angustior* (Hanley & Theobald, 1876) | Myanmar: Sittaung Basin, Chain Stream | RMBH: biv 394/1 | MN275088 | n/a | n/a | 17.6660 | 96.2465 |
| *T. angustior* (Hanley & Theobald, 1876) | Myanmar: Sittaung Basin, Chain Stream | RMBH: biv 394/3 | MN780885 | n/a | n/a | 17.6660 | 96.2465 |
| *T. dolichorhynchus* (Tapparone Canefri, 1889) | Myanmar: Ayeyarwady River | UA<USA-AL>:20729.1 | JN243903 | KP795042 | JN243881 | 21.4819 | 95.3050 |
| *T. dolichorhynchus* (Tapparone Canefri, 1889) | Myanmar: Ayeyarwady Basin, Manipur River | RMBH: biv 336/1 | MN780869 | n/a | n/a | 23.2285 | 94.1434 |
| *T. dolichorhynchus* (Tapparone Canefri, 1889) | Myanmar: Ayeyarwady Basin, Manipur River | RMBH: biv 336/2 | MN780870 | n/a | n/a | 23.2285 | 94.1434 |
| *T. dolichorhynchus* (Tapparone Canefri, 1889) | Myanmar: Ayeyarwady Basin, Manipur River | RMBH: biv 336/3 | MN275090 | n/a | MN307217 | 23.2285 | 94.1434 |
| *T. dolichorhynchus* (Tapparone Canefri, 1889) | Myanmar: Ayeyarwady Basin, Chindwin River | RMBH: biv 353 | MN780871 | n/a | n/a | 23.1499 | 94.3629 |
| *T. dolichorhynchus* (Tapparone Canefri, 1889) | Myanmar: Ayeyarwady Basin, Chindwin River | RMBH: biv 354/1 | MN780872 | n/a | n/a | 23.1499 | 94.3629 |
| *T. dolichorhynchus* (Tapparone Canefri, 1889) | Myanmar: Ayeyarwady Basin, Chindwin River | RMBH: biv 354/2 | MN780873 | n/a | n/a | 23.1499 | 94.3629 |
| *T. dolichorhynchus* (Tapparone Canefri, 1889) | Myanmar: Ayeyarwady Basin, Chindwin River | RMBH: biv 354/3 | MN780874 | n/a | n/a | 23.1499 | 94.3629 |
| *T. dolichorhynchus* (Tapparone Canefri, 1889) | Myanmar: Ayeyarwady River near Tant Kyi village | RMBH: biv 417/1 | MN275089 | MN307274 | MN307216 | 21.1567 | 94.8050 |
| *T. dolichorhynchus* (Tapparone Canefri, 1889) | Myanmar: Ayeyarwady River near Tant Kyi village | RMBH: biv 417/2 | MN780886 | n/a | n/a | 21.1567 | 94.8050 |
| *T. dolichorhynchus* (Tapparone Canefri, 1889) | Myanmar: Ayeyarwady River near Tant Kyi village | RMBH: biv 417/3 | MN780887 | n/a | n/a | 21.1567 | 94.8050 |
| *T. dolichorhynchus* (Tapparone Canefri, 1889) | Myanmar: Ayeyarwady River at Mandalay city | RMBH: biv 442/1 | OL597740 | n/a | n/a | 21.9909 | 96.0610 |
| *T. dolichorhynchus* (Tapparone Canefri, 1889) | Myanmar: Ayeyarwady River at Mandalay city | RMBH: biv 442/2 | OL597741 | n/a | n/a | 21.9909 | 96.0610 |
| *T. yeti* Konopleva et al., 2020 | Myanmar: Ye River | RMBH: biv 616/1 | MN780888 | MN759081 | MN759085 | 15.2957 | 97.9984 |
| *T. yeti* Konopleva et al., 2020 | Myanmar: Ye River | RMBH: biv 616/2 | MN780889 | MN759082 | MN759086 | 15.2957 | 97.9984 |
| *T. yeti* Konopleva et al., 2020 | Myanmar: Ye River | RMBH: biv 617/1 | MN780890 | MN759083 | MN759087 | 15.2957 | 97.9984 |
| *T. yeti* Konopleva et al., 2020 | Myanmar: Ye River | RMBH: biv 617/2 | MN780891 | MN759084 | MN759088 | 15.2957 | 97.9984 |
| ***Lamellidens* Simpson, 1900** | | | | | | | |
| *Lamellidens savadiensis* (Nevill, 1877) | Myanmar: Ayeyarwady Basin, Lake Indawgyi | RMBH: biv 109/1 | KX230544 | KX230555 | KX230566 | 25.1099 | 96.2925 |
| *L. savadiensis* (Nevill, 1877) | Myanmar: Ayeyarwady Basin, Lake Indawgyi | RMBH: biv 109/2 | KX230545 | KX230556 | KX230567 | 25.1099 | 96.2925 |
| *L. savadiensis* (Nevill, 1877) | Myanmar: Ayeyarwady Basin, Lake Indawgyi | RMBH: biv 109/3 | KX230546 | KX230557 | KX230568 | 25.1099 | 96.2925 |
| *L. savadiensis* (Nevill, 1877) | Myanmar: Sittaung Basin, Pathi River | RMBH: biv 242/8 | MF352220 | MF352294 | MF352352 | 19.0278 | 96.5353 |
| *L. savadiensis* (Nevill, 1877) | Myanmar: Sittaung Basin, Pathi River | RMBH: biv 242/15 | MF352221 | MF352295 | MF352353 | 19.0278 | 96.5353 |
| *L. savadiensis* (Nevill, 1877) | Myanmar: Sittaung Basin, fishing pond | RMBH: biv 247/8 | MF352231 | MF352303 | MF352361 | 18.9593 | 96.4831 |
| *L. savadiensis* (Nevill, 1877) | Myanmar: Sittaung Basin, fishing pond | RMBH: biv 247/14 | MF352233 | n/a | n/a | 18.9593 | 96.4831 |
| *L. savadiensis* (Nevill, 1877) | Myanmar: Ayeyarwady Basin, Lake Nant Phar | RMBH: biv 257/1 | MF352258 | MF352322 | MF352383 | 24.2972 | 97.2610 |
| *L. savadiensis* (Nevill, 1877) | Myanmar: Ayeyarwady Basin, Lake Nant Phar | RMBH: biv 257/6 | MF352259 | MF352323 | MF352384 | 24.2972 | 97.2610 |
| *L. savadiensis* (Nevill, 1877) | Myanmar: Ayeyarwady Basin, Lake Nant Phar | RMBH: biv 257/9 | MF352260 | MF352324 | MF352385 | 24.2972 | 97.2610 |
| *L. savadiensis* (Nevill, 1877) | Myanmar: Ayeyarwady Basin, Lake Shwe Kyi | RMBH: biv 261/3 | MF352269 | MF352333 | MF352393 | 24.2927 | 97.2299 |
| *L. savadiensis* (Nevill, 1877) | Myanmar: Ayeyarwady Basin, Lake Shwe Kyi | RMBH: biv 261/6 | MF352270 | MF352334 | MF352394 | 24.2927 | 97.2299 |
| *L. savadiensis* (Nevill, 1877) | Myanmar: Ayeyarwady Basin, Lake Shwe Kyi | RMBH: biv 261/7 | MF352271 | n/a | n/a | 24.2927 | 97.2299 |
| *L. savadiensis* (Nevill, 1877) | Myanmar: Ayeyarwady Basin, Nant Sa Yi River | RMBH: biv 262/1 | MF352272 | MF352335 | MF352395 | 24.2196 | 97.2224 |
| *L. savadiensis* (Nevill, 1877) | Myanmar: Ayeyarwady Basin, Nant Sa Yi River | RMBH: biv 262/2 | MF352273 | n/a | n/a | 24.2196 | 97.2224 |
| *L. savadiensis* (Nevill, 1877) | Myanmar: Ayeyarwady Basin, Nant Sa Yi River | RMBH: biv 262/4 | MF352274 | MF352336 | MF352396 | 24.2196 | 97.2224 |
| *L. savadiensis* (Nevill, 1877) | Myanmar: Ayeyarwady Basin, Lake Myaung | RMBH: biv 264/1 | MF352277 | MF352339 | MF352398 | 24.2387 | 97.1658 |
| *L. savadiensis* (Nevill, 1877) | Myanmar: Ayeyarwady Basin, Lake Myaung | RMBH: biv 264/4 | MF352278 | n/a | n/a | 24.2387 | 97.1658 |
| *L. savadiensis* (Nevill, 1877) | Myanmar: Ayeyarwady Basin, Lake Myaung | RMBH: biv 264/7 | MF352279 | MF352340 | MF352399 | 24.2387 | 97.1658 |
| *L. savadiensis* (Nevill, 1877) | Myanmar: Salween Basin, Lake Nadi | RMBH: biv 399/1 | OL597742 | n/a | n/a | 20.6858 | 96.9316 |
| *L. savadiensis* (Nevill, 1877) | Myanmar: Salween Basin, Lake Nadi | RMBH: biv 399/2 | OL597743 | n/a | n/a | 20.6858 | 96.9316 |
| *L. savadiensis* (Nevill, 1877) | Myanmar: Sittaung Basin, Hnit Saung Pyang Stream | RMBH: biv 408 | OL597744 | n/a | n/a | 19.5140 | 96.2621 |
| *L. savadiensis* (Nevill, 1877) | Myanmar: Sittaung Basin, Sin Thay Dam | RMBH: biv 413/1 | OL597745 | n/a | OL598395 | 20.1540 | 96.1149 |
| *L. savadiensis* (Nevill, 1877) | Myanmar: Sittaung Basin, Sin Thay Dam | RMBH: biv 413/2 | OL597746 | n/a | n/a | 20.1540 | 96.1149 |
| *L. savadiensis* (Nevill, 1877) | Myanmar: Sittaung Basin, Sin Thay Dam | RMBH: biv 413/3 | OL597747 | n/a | n/a | 20.1540 | 96.1149 |
| *L. savadiensis* (Nevill, 1877) | Myanmar: Ayeyarwady Basin, Mone Ding Dam outlet | RMBH: biv 415/1 | OL597748 | n/a | OL598396 | 20.8099 | 95.7242 |
| *L. savadiensis* (Nevill, 1877) | Myanmar: Ayeyarwady Basin, Mone Ding Dam outlet | RMBH: biv 415/2 | OL597749 | n/a | n/a | 20.8099 | 95.7242 |
| *L. savadiensis* (Nevill, 1877) | Myanmar: Ayeyarwady Basin, Mone Ding Dam outlet | RMBH: biv 415/3 | OL597750 | n/a | n/a | 20.8099 | 95.7242 |
| *L. savadiensis* (Nevill, 1877) | Myanmar: Ayeyarwady Basin, Mone Ding Dam outlet | RMBH: biv 416/1 | OL597751 | n/a | n/a | 20.8099 | 95.7242 |
| *L. savadiensis* (Nevill, 1877) | Myanmar: Ayeyarwady Basin, Mone Ding Dam outlet | RMBH: biv 416/2 | OL597752 | n/a | OL598397 | 20.8099 | 95.7242 |
| *L. savadiensis* (Nevill, 1877) | Myanmar: Ayeyarwady Basin, Mone Ding Dam outlet | RMBH: biv 416/3 | OL597753 | n/a | n/a | 20.8099 | 95.7242 |
| *L. savadiensis* (Nevill, 1877) | Myanmar: Ayeyarwady Basin, ox-bow lake near Ta Naung Taig village | RMBH: biv 427A/1 | OL597754 | n/a | OL598398 | 21.4064 | 95.3399 |
| *L. savadiensis* (Nevill, 1877) | Myanmar: Ayeyarwady Basin, ox-bow lake near Ta Naung Taig village | RMBH: biv 427A/2 | OL597755 | n/a | n/a | 21.4064 | 95.3399 |
| *L. savadiensis* (Nevill, 1877) | Myanmar: Ayeyarwady River at Mandalay city | RMBH: biv 442/3 | OL597756 | n/a | n/a | 21.9909 | 96.0610 |
| *L. generosus* (Gould, 1847) | Myanmar: Sittaung Basin, Pathi River | RMBH: biv 242/3 | MF352219 | MF352293 | MF352351 | 19.0278 | 96.5353 |
| *L. generosus* (Gould, 1847) | Myanmar: Sittaung Basin, Pathi River | RMBH: biv 243/10 | MF352222 | MF352296 | MF352354 | 19.0278 | 96.5353 |
| *L. generosus* (Gould, 1847) | Myanmar: Sittaung Basin, Pathi River | RMBH: biv 243/12 | MF352223 | MF352297 | MF352355 | 19.0278 | 96.5353 |
| *L. generosus* (Gould, 1847) | Myanmar: Sittaung Basin, Pathi River | RMBH: biv 243/14 | MF352224 | n/a | n/a | 19.0278 | 96.5353 |
| *L. generosus* (Gould, 1847) | Myanmar: Sittaung Basin, reservoir of Yetho River | RMBH: biv 244/2 | MF352225 | n/a | n/a | 18.8457 | 96.3012 |
| *L. generosus* (Gould, 1847) | Myanmar: Sittaung Basin, reservoir of Yetho River | RMBH: biv 244/3 | MF352226 | MF352298 | MF352356 | 18.8457 | 96.3012 |
| *L. generosus* (Gould, 1847) | Myanmar: Sittaung Basin, reservoir of Yetho River | RMBH: biv 244/5 | MF352227 | MF352299 | MF352357 | 18.8457 | 96.3012 |
| *L. generosus* (Gould, 1847) | Myanmar: Sittaung Basin, fishing pond | RMBH: biv 247/10 | MF352232 | MF352304 | MF352362 | 18.9593 | 96.4831 |
| *L. generosus* (Gould, 1847) | Myanmar: Sittaung River near Taungoo | RMBH: biv 250/13 | MF352241 | MF352311 | MF352369 | 18.9613 | 96.4455 |
| *L. generosus* (Gould, 1847) | Myanmar: Ayeyarwady Basin, Kalemyo market | RMBH: biv 355/1 | OL597757 | n/a | OL598399 | 23.1746 | 94.0423 |
| *L. generosus* (Gould, 1847) | Myanmar: Ayeyarwady Basin, Kalemyo market | RMBH: biv 355/2 | OL597758 | n/a | n/a | 23.1746 | 94.0423 |
| *L. generosus* (Gould, 1847) | Myanmar: Ayeyarwady Basin, Kalemyo market | RMBH: biv 355/3 | OL597759 | n/a | n/a | 23.1746 | 94.0423 |
| *L. generosus* (Gould, 1847) | Myanmar: Ayeyarwady Basin, fish pond near Kalemyo | RMBH: biv 356/1 | OL597760 | n/a | n/a | 23.1746 | 94.0423 |
| *L. generosus* (Gould, 1847) | Myanmar: Ayeyarwady Basin, fish pond near Kalemyo | RMBH: biv 356/2 | OL597761 | n/a | OL598400 | 23.1746 | 94.0423 |
| *L. generosus* (Gould, 1847) | Myanmar: Ayeyarwady Basin, fish pond near Kalemyo | RMBH: biv 356/3 | OL597762 | n/a | n/a | 23.1746 | 94.0423 |
| *L. generosus* (Gould, 1847) | Myanmar: Ayeyarwady Basin, tributary of Nay Chin Sayar River | RMBH: biv 358/1 | OL597763 | n/a | OL598401 | 23.4160 | 94.0875 |
| *L. generosus* (Gould, 1847) | Myanmar: Ayeyarwady Basin, tributary of Nay Chin Sayar River | RMBH: biv 358/2 | OL597764 | n/a | n/a | 23.4160 | 94.0875 |
| *L. generosus* (Gould, 1847) | Myanmar: Ayeyarwady Basin, tributary of Nay Chin Sayar River | RMBH: biv 358/3 | OL597765 | n/a | n/a | 23.4160 | 94.0875 |
| *L. generosus* (Gould, 1847) | Myanmar: tributary of Haungthayaw River | RMBH: biv 359/1 | OL597766 | n/a | n/a | 16.6104 | 98.0110 |
| *L. generosus* (Gould, 1847) | Myanmar: tributary of Haungthayaw River | RMBH: biv 359/3 | OL597767 | n/a | OL598402 | 16.6104 | 98.0110 |
| *L. generosus* (Gould, 1847) | Myanmar: Haungthayaw River upStream of Kawkareik town | RMBH: biv 363/1 | OL597768 | n/a | OL598403 | 16.4714 | 98.2183 |
| *L. generosus* (Gould, 1847) | Myanmar: Haungthayaw River upStream of Kawkareik town | RMBH: biv 363/2 | OL597769 | n/a | n/a | 16.4714 | 98.2183 |
| *L. generosus* (Gould, 1847) | Myanmar: Haungthayaw River upStream of Kawkareik town | RMBH: biv 363/3 | OL597770 | n/a | n/a | 16.4714 | 98.2183 |
| *L. generosus* (Gould, 1847) | Myanmar: Haungthayaw Basin, Stream near Kawkareik town | RMBH: biv 364/1 | OL597771 | n/a | OL598404 | 16.5365 | 98.2202 |
| *L. generosus* (Gould, 1847) | Myanmar: Haungthayaw Basin, Stream near Kawkareik town | RMBH: biv 364/3 | OL597772 | n/a | n/a | 16.5365 | 98.2202 |
| *L. generosus* (Gould, 1847) | Myanmar: Haungthayaw Basin, ox-bow lake south of Hpa-An airport | RMBH: biv 365/1 | OL597773 | n/a | OL598405 | 16.8819 | 97.6629 |
| *L. generosus* (Gould, 1847) | Myanmar: Haungthayaw Basin, ox-bow lake south of Hpa-An airport | RMBH: biv 365/2 | OL597774 | n/a | n/a | 16.8819 | 97.6629 |
| *L. generosus* (Gould, 1847) | Myanmar: Salween Basin, Mizan Stream | RMBH: biv 366/2 | OL597775 | n/a | OL598406 | 16.9770 | 97.6330 |
| *L. generosus* (Gould, 1847) | Myanmar: Salween Basin, Mizan Stream | RMBH: biv 366/3 | OL597776 | n/a | n/a | 16.9770 | 97.6330 |
| *L. generosus* (Gould, 1847) | Myanmar: Bilin Basin, Lake Shwe Laung | RMBH: biv 372/1 | OL597777 | n/a | OL598407 | 17.4395 | 97.2457 |
| *L. generosus* (Gould, 1847) | Myanmar: Bilin Basin, Lake Shwe Laung | RMBH: biv 372/2 | OL597778 | n/a | n/a | 17.4395 | 97.2457 |
| *L. generosus* (Gould, 1847) | Myanmar: Bilin Basin, Lake Shwe Laung | RMBH: biv 372/3 | OL597779 | n/a | n/a | 17.4395 | 97.2457 |
| *L. generosus* (Gould, 1847) | Myanmar: Bago - Sittaung channel | RMBH: biv 376/1 | OL597780 | n/a | n/a | 17.5818 | 96.7733 |
| *L. generosus* (Gould, 1847) | Myanmar: Bago - Sittaung channel | RMBH: biv 376/2 | OL597781 | n/a | n/a | 17.5818 | 96.7733 |
| *L. generosus* (Gould, 1847) | Myanmar: Bago - Sittaung channel | RMBH: biv 376/3 | OL597782 | n/a | n/a | 17.5818 | 96.7733 |
| *L. generosus* (Gould, 1847) | Myanmar: Lake Moeyungyi | RMBH: biv 378/1 | OL597783 | n/a | n/a | 17.5968 | 96.5950 |
| *L. generosus* (Gould, 1847) | Myanmar: Lake Moeyungyi | RMBH: biv 378/2 | OL597784 | n/a | n/a | 17.5968 | 96.5950 |
| *L. generosus* (Gould, 1847) | Myanmar: Lake Moeyungyi | RMBH: biv 378/3 | OL597785 | n/a | n/a | 17.5968 | 96.5950 |
| *L. generosus* (Gould, 1847) | Myanmar: Bago Basin, pond near the Salu Dam | RMBH: biv 379/1 | OL597786 | n/a | n/a | 17.5492 | 96.3736 |
| *L. generosus* (Gould, 1847) | Myanmar: Bago Basin, pond near the Salu Dam | RMBH: biv 379/2 | OL597787 | n/a | n/a | 17.5492 | 96.3736 |
| *L. generosus* (Gould, 1847) | Myanmar: Bago Basin, pond near the Salu Dam | RMBH: biv 379/3 | OL597788 | n/a | n/a | 17.5492 | 96.3736 |
| *L. generosus* (Gould, 1847) | Myanmar: Bago River | RMBH: biv 384/1 | OL597789 | n/a | n/a | 17.5334 | 96.3315 |
| *L. generosus* (Gould, 1847) | Myanmar: Bago River | RMBH: biv 384/2 | OL597790 | n/a | OL598408 | 17.5334 | 96.3315 |
| *L. generosus* (Gould, 1847) | Myanmar: Bago River | RMBH: biv 384/3 | OL597791 | n/a | n/a | 17.5334 | 96.3315 |
| *L. generosus* (Gould, 1847) | Myanmar: Bago Basin, Moload Stream | RMBH: biv 385/2 | OL597792 | n/a | n/a | 17.6011 | 96.2861 |
| *L. generosus* (Gould, 1847) | Myanmar: Bago Basin, Moload Stream | RMBH: biv 385/3 | OL597793 | n/a | n/a | 17.6011 | 96.2861 |
| *L. generosus* (Gould, 1847) | Myanmar: Bago Basin, Kyauk Phar Stream | RMBH: biv 387/1 | OL597794 | n/a | n/a | 17.6660 | 96.2465 |
| *L. generosus* (Gould, 1847) | Myanmar: Bago Basin, Kyauk Phar Stream | RMBH: biv 387/2 | OL597795 | n/a | n/a | 17.6660 | 96.2465 |
| *L. generosus* (Gould, 1847) | Myanmar: Bago Basin, Pagaing Stream | RMBH: biv 392/1 | OL597796 | n/a | n/a | 17.7080 | 96.7155 |
| *L. generosus* (Gould, 1847) | Myanmar: Bago Basin, Pagaing Stream | RMBH: biv 392/2 | OL597797 | n/a | n/a | 17.7080 | 96.7155 |
| *L. generosus* (Gould, 1847) | Myanmar: Bago Basin, Pagaing Stream | RMBH: biv 392/3 | OL597798 | n/a | n/a | 17.7080 | 96.7155 |
| *L. generosus* (Gould, 1847) | Myanmar: Hlaingbwe Basin, Hlaingbwe Stream | RMBH: biv 636/1 | OL597799 | n/a | n/a | 17.0292 | 97.8099 |
| *L. generosus* (Gould, 1847) | Myanmar: Hlaingbwe Basin, Hlaingbwe Stream | RMBH: biv 636/2 | OL597800 | OL598377 | OL598409 | 17.0292 | 97.8099 |
| *L. generosus* (Gould, 1847) | Myanmar: Hlaingbwe Basin, Hlaingbwe Stream | RMBH: biv 636/3 | OL597801 | OL598378 | OL598410 | 17.0292 | 97.8099 |
| *L. generosus* (Gould, 1847) | Myanmar: Ayeyarwady Basin, Pathein River | RMBH: biv 648/1 | OL597802 | n/a | n/a | 17.4567 | 95.0086 |
| *L. generosus* (Gould, 1847) | Myanmar: Ayeyarwady Basin, Pathein River | RMBH: biv 648/2 | OL597803 | n/a | n/a | 17.4567 | 95.0086 |
| *L. generosus* (Gould, 1847) | Myanmar: Ayeyarwady Basin, Nga Wun River near Pyay city | RMBH: biv 672/1 | OL597804 | n/a | n/a | 18.8624 | 95.2822 |
| *L. generosus* (Gould, 1847) | Myanmar: Ayeyarwady Basin, Nga Wun River near Pyay city | RMBH: biv 672/2 | OL597805 | n/a | n/a | 18.8624 | 95.2822 |
| *L. generosus* (Gould, 1847) | Myanmar: Haungthayaw River | RMBH: biv 1024/1 | OL597806 | OL598379 | n/a | 15.9620 | 98.4152 |
| *L. generosus* (Gould, 1847) | Myanmar: Haungthayaw River | RMBH: biv 1024/2 | OL597807 | n/a | n/a | 15.9620 | 98.4152 |
| *L. generosus* (Gould, 1847) | Myanmar: Haungthayaw River | RMBH: biv 1024/3 | OL597808 | n/a | n/a | 15.9620 | 98.4152 |
| *L. ferrugineus* (Annandale, 1918) | Myanmar: Salween Basin, Lake Inle, a channel in Nuangshve | RMBH: biv 112/7 | KX865828 | KX865599 | KX865702 | 20.6632 | 96.9310 |
| *L. ferrugineus* (Annandale, 1918) | Myanmar: Salween Basin, Lake Inle, a channel in Nuangshve | RMBH: biv 112/12 | KX865829 | KX865600 | KX865703 | 20.6632 | 96.9310 |
| *L. ferrugineus* (Annandale, 1918) | Myanmar: Salween Basin, Lake Inle, a channel in Nuangshve | RMBH: biv 112/15 | KX865830 | KX865601 | KX865704 | 20.6632 | 96.9310 |
| *L. ferrugineus* (Annandale, 1918) | Myanmar: Salween Basin, lower channel of Lake Inle | RMBH: biv 113/8 | KX865825 | KX865596 | KX865699 | 20.4421 | 96.9037 |
| *L. ferrugineus* (Annandale, 1918) | Myanmar: Salween Basin, lower channel of Lake Inle | RMBH: biv 113/12 | KX865826 | KX865597 | KX865700 | 20.4421 | 96.9037 |
| *L. ferrugineus* (Annandale, 1918) | Myanmar: Salween Basin, lower channel of Lake Inle | RMBH: biv 113/14 | KX865827 | KX865598 | KX865701 | 20.4421 | 96.9037 |
| *L. ferrugineus* (Annandale, 1918) | Myanmar: Salween Basin, Nam Pilu River | RMBH: biv 141/5 | KX865831 | KX865602 | KX865705 | 19.6746 | 97.1352 |
| *L. ferrugineus* (Annandale, 1918) | Myanmar: Salween Basin, Nam Pilu River | RMBH: biv 141/9 | KX865832 | KX865603 | KX865706 | 19.6746 | 97.1352 |
| *L. ferrugineus* (Annandale, 1918) | Myanmar: Salween Basin, Nam Pilu River | RMBH: biv 141/18 | KX865833 | KX865604 | KX865707 | 19.6746 | 97.1352 |
| *L. ferrugineus* (Annandale, 1918) | Myanmar: Salween Basin, Snake Stream | RMBH: biv 142/1 | KX865834 | KX865605 | KX865708 | 19.7266 | 97.0992 |
| *L. ferrugineus* (Annandale, 1918) | Myanmar: Salween Basin, Lake Inle, Nan Lat Stream | RMBH: biv 397/1 | OL597809 | n/a | n/a | 20.9162 | 96.9144 |
| *L. ferrugineus* (Annandale, 1918) | Myanmar: Salween Basin, Lake Inle, Nan Lat Stream | RMBH: biv 397/2 | OL597810 | n/a | n/a | 20.9162 | 96.9144 |
| *L. ferrugineus* (Annandale, 1918) | Myanmar: Salween Basin, Lake Inle, tributary of Nan Lat Stream | RMBH: biv 398/3 | OL597811 | n/a | n/a | 21.0930 | 96.9282 |
| *L. ferrugineus* (Annandale, 1918) | Myanmar: Salween Basin, Wain Kaun | RMBH: biv 401/1 | OL597812 | n/a | n/a | 20.1323 | 97.1957 |
| *L. ferrugineus* (Annandale, 1918) | Myanmar: Salween Basin, Wain Kaun | RMBH: biv 401/2 | OL597813 | n/a | n/a | 20.1323 | 97.1957 |
| *L. ferrugineus* (Annandale, 1918) | Myanmar: Salween Basin, Wain Kaun | RMBH: biv 401/3 | OL597814 | n/a | n/a | 20.1323 | 97.1957 |
| *L. ferrugineus* (Annandale, 1918) | Myanmar: Salween Basin, fish pond near Demoso | RMBH: biv 404/1 | OL597815 | n/a | n/a | 19.7289 | 97.1167 |
| *L. ferrugineus* (Annandale, 1918) | Myanmar: Salween Basin, fish pond near Demoso | RMBH: biv 404/2 | OL597816 | n/a | n/a | 19.7289 | 97.1167 |
| *L. ferrugineus* (Annandale, 1918) | Myanmar: Salween Basin, fish pond near Demoso | RMBH: biv 404/3 | OL597817 | n/a | n/a | 19.7289 | 97.1167 |
| *L. ferrugineus* (Annandale, 1918) | Myanmar: Salween Basin, Balu River near Loikaw | RMBH: biv 406A/1 | OL597818 | n/a | n/a | 19.6682 | 97.1848 |
| *L. ferrugineus* (Annandale, 1918) | Myanmar: Salween Basin, Balu River near Loikaw | RMBH: biv 406A/2 | OL597819 | n/a | n/a | 19.6682 | 97.1848 |
| *L. ferrugineus* (Annandale, 1918) | Myanmar: Salween Basin, Balu River near Loikaw | RMBH: biv 408A/1 | OL597820 | n/a | n/a | 19.6682 | 97.1848 |
| *L. ferrugineus* (Annandale, 1918) | Myanmar: Salween Basin, Balu River near Loikaw | RMBH: biv 408A/2 | OL597821 | n/a | n/a | 19.6682 | 97.1848 |
| *L.* *mainwaringi* Preston, 1912 | Myanmar: Kaladan Basin, unnamed puddle | RMBH: biv 153 | KX230547 | KX230558 | KX230569 | 21.0079 | 92.9832 |
| **Parreysiini Henderson, 1935** | | | | | | | |
| ***Parreysia* Conrad, 1853** | | | | | | | |
| *Parreysia rakhinensis* Bolotov et al., 2020 | Myanmar: Kyeintali Stream, upStream of Odein village | RMBH: biv 652/1 | MN275091 | MN307275 | MN307218 | 17.9193 | 94.5946 |
| *Parreysia rakhinensis* Bolotov et al., 2020 | Myanmar: Thandwe River, Ywar Shai village | RMBH: biv 656 | MN275104 | MN307276 | MN307219 | 18.3741 | 94.4952 |
| *Parreysia rakhinensis* Bolotov et al., 2020 | Myanmar: tributary of the Ann River | RMBH: biv 660/3 | MN275116 | MN307277 | MN307220 | 19.8035 | 94.0460 |
| **Leoparreysiini Vikhrev, Bolotov & Kondakov, 2017** | | | | | | | |
| ***Leoparreysia* Vikhrev, Bolotov & Aksenova in Bolotov et al., 2017** | | | | | | | |
| *Leoparreysia olivacea* (Prashad, 1930) | Myanmar: Ayeyarwady River, 3 mi SW Pakkoku, Magway Division | UMMZ: 304641 | KP795022 | KP795044 | KP795005 | n/a | n/a |
| *L. olivacea* (Prashad, 1930) | Myanmar: Ayeyarwady River, Nant Kaung River | RMBH: biv 932/1 | OK480028 | n/a | n/a | 25.5361 | 96.7267 |
| *L. olivacea* (Prashad, 1930) | Myanmar: Ayeyarwady River, Nant Kaung River | RMBH: biv 932/2 | OK480029 | n/a | n/a | 25.5361 | 96.7267 |
| *L. olivacea* (Prashad, 1930) | Myanmar: Ayeyarwady River, Nant Kaung River | RMBH: biv 932/3 | OK480030 | n/a | n/a | 25.5361 | 96.7267 |
| *L. canefrii* Vikhrev, Bolotov & Kondakov, 2017 | Myanmar: Sittaung River near Taungoo | RMBH: biv 249 | MF352237 | MF352307 | MF352365 | 18.9840 | 96.4361 |
| *L. canefrii* Vikhrev, Bolotov & Kondakov, 2017 | Myanmar: Sittaung River near Taungoo | RMBH: biv 252/1 | MF352245 | MF352315 | MF352373 | 18.9840 | 96.4361 |
| *L. canefrii* Vikhrev, Bolotov & Kondakov, 2017 | Myanmar: Sittaung River near Taungoo | RMBH: biv 252/2 | MF352246 | MF352316 | MF352374 | 18.9840 | 96.4361 |
| *L. canefrii* Vikhrev, Bolotov & Kondakov, 2017 | Myanmar: Sittaung River near Taungoo | RMBH: biv 252/3 | MF352247 | n/a | n/a | 18.9840 | 96.4361 |
| *L. canefrii* Vikhrev, Bolotov & Kondakov, 2017 | Myanmar: Sittaung River near Taungoo | RMBH: biv 254/2 | MF352250 | MF352319 | MF352377 | 18.9840 | 96.4361 |
| *L. canefrii* Vikhrev, Bolotov & Kondakov, 2017 | Myanmar: Sittaung River near Taungoo | RMBH: biv 254/4 | MF352251 | n/a | n/a | 18.9840 | 96.4361 |
| *L. canefrii* Vikhrev, Bolotov & Kondakov, 2017 | Myanmar: Sittaung River near Taungoo | RMBH: biv 254/6 | MF352252 | n/a | n/a | 18.9840 | 96.4361 |
| *L. canefrii* Vikhrev, Bolotov & Kondakov, 2017 | Myanmar: Ayeyarwady Basin, Myit Tha (Manipur) River | RMBH: biv 340/1 | OL597825 | n/a | OL598411 | 23.2285 | 94.1434 |
| *L. canefrii* Vikhrev, Bolotov & Kondakov, 2017 | Myanmar: Ayeyarwady Basin, Myit Tha (Manipur) River | RMBH: biv 340/3 | OL597826 | n/a | n/a | 23.2285 | 94.1434 |
| *L. canefrii* Vikhrev, Bolotov & Kondakov, 2017 | Myanmar: Ayeyarwady Basin, Myit Tha (Manipur) River | RMBH: biv 343 | OL597827 | n/a | OL598412 | 23.2448 | 94.1662 |
| *L. canefrii* Vikhrev, Bolotov & Kondakov, 2017 | Myanmar: Ayeyarwady Basin, Chindwin River | RMBH: biv 352 | OL597828 | n/a | OL598413 | 23.1499 | 94.3629 |
| *L. canefrii* Vikhrev, Bolotov & Kondakov, 2017 | Myanmar: Bilin River near Daung Yet village | RMBH: biv 374/1 | OL597829 | n/a | n/a | 17.2102 | 97.2488 |
| *L. canefrii* Vikhrev, Bolotov & Kondakov, 2017 | Myanmar: Bilin River near Daung Yet village | RMBH: biv 374/2 | OL597830 | n/a | n/a | 17.2102 | 97.2488 |
| *L. canefrii* Vikhrev, Bolotov & Kondakov, 2017 | Myanmar: Bilin River near Daung Yet village | RMBH: biv 374/3 | OL597831 | n/a | n/a | 17.2102 | 97.2488 |
| *L. canefrii* Vikhrev, Bolotov & Kondakov, 2017 | Myanmar: Bago River | RMBH: biv 380/1 | OL597832 | n/a | n/a | 17.5334 | 96.3315 |
| *L. canefrii* Vikhrev, Bolotov & Kondakov, 2017 | Myanmar: Bago River | RMBH: biv 380/2 | OL597833 | n/a | n/a | 17.5334 | 96.3315 |
| *L. canefrii* Vikhrev, Bolotov & Kondakov, 2017 | Myanmar: Bago River | RMBH: biv 380/3 | OL597834 | n/a | n/a | 17.5334 | 96.3315 |
| *L. canefrii* Vikhrev, Bolotov & Kondakov, 2017 | Myanmar: Bago River | RMBH: biv 391/1 | OL597835 | n/a | n/a | 17.6795 | 96.2347 |
| *L. canefrii* Vikhrev, Bolotov & Kondakov, 2017 | Myanmar: Bago River | RMBH: biv 391/2 | OL597836 | n/a | n/a | 17.6795 | 96.2347 |
| *L. canefrii* Vikhrev, Bolotov & Kondakov, 2017 | Myanmar: Bago River | RMBH: biv 391/3 | OL597837 | n/a | n/a | 17.6795 | 96.2347 |
| *L. canefrii* Vikhrev, Bolotov & Kondakov, 2017 | Myanmar: Ayeyarwady River near Tant Kyi village | RMBH: biv 418/1 | OL597838 | n/a | n/a | 21.1567 | 94.8050 |
| *L. canefrii* Vikhrev, Bolotov & Kondakov, 2017 | Myanmar: Ayeyarwady River near Tant Kyi village | RMBH: biv 418/2 | OL597839 | n/a | OL598414 | 21.1567 | 94.8050 |
| *L. canefrii* Vikhrev, Bolotov & Kondakov, 2017 | Myanmar: Ayeyarwady River near Tant Kyi village | RMBH: biv 418/3 | OL597840 | n/a | n/a | 21.1567 | 94.8050 |
| *L. canefrii* Vikhrev, Bolotov & Kondakov, 2017 | Myanmar: Ayeyarwady River at Mandalay city | RMBH: biv 431 | OL597841 | n/a | n/a | 21.9574 | 96.0510 |
| *L. canefrii* Vikhrev, Bolotov & Kondakov, 2017 | Myanmar: Ayeyarwady River at Mandalay city | RMBH: biv 432/1 | OL597842 | n/a | n/a | 21.9574 | 96.0510 |
| *L. canefrii* Vikhrev, Bolotov & Kondakov, 2017 | Myanmar: Ayeyarwady River at Mandalay city | RMBH: biv 432/2 | OL597843 | n/a | n/a | 21.9574 | 96.0510 |
| *L. canefrii* Vikhrev, Bolotov & Kondakov, 2017 | Myanmar: Ayeyarwady River at Mandalay city | RMBH: biv 433/1 | OL597844 | n/a | n/a | 21.9574 | 96.0510 |
| *L. canefrii* Vikhrev, Bolotov & Kondakov, 2017 | Myanmar: Ayeyarwady River at Mandalay city | RMBH: biv 433/2 | OL597845 | n/a | n/a | 21.9574 | 96.0510 |
| *L. canefrii* Vikhrev, Bolotov & Kondakov, 2017 | Myanmar: Ayeyarwady River at Mandalay city | RMBH: biv 433/3 | OL597846 | n/a | n/a | 21.9574 | 96.0510 |
| *L. canefrii* Vikhrev, Bolotov & Kondakov, 2017 | Myanmar: Ayeyarwady River near Mandalay city | RMBH: biv 444/1 | OL597847 | n/a | n/a | 21.8893 | 95.9978 |
| *L. canefrii* Vikhrev, Bolotov & Kondakov, 2017 | Myanmar: Ayeyarwady River near Mandalay city | RMBH: biv 444/2 | OL597848 | n/a | n/a | 21.8893 | 95.9978 |
| *L. canefrii* Vikhrev, Bolotov & Kondakov, 2017 | Myanmar: Ayeyarwady River near Mandalay city | RMBH: biv 444/3 | OL597849 | n/a | n/a | 21.8893 | 95.9978 |
| *L. canefrii* Vikhrev, Bolotov & Kondakov, 2017 | Myanmar: Ayeyarwady River near Mandalay city | RMBH: biv 446/1 | OL597850 | n/a | n/a | 21.8893 | 95.9978 |
| *L. canefrii* Vikhrev, Bolotov & Kondakov, 2017 | Myanmar: Ayeyarwady River near Mandalay city | RMBH: biv 446/2 | OL597851 | n/a | n/a | 21.8893 | 95.9978 |
| *L. canefrii* Vikhrev, Bolotov & Kondakov, 2017 | Myanmar: Ayeyarwady Basin, Mole Stream | RMBH: biv 922/1 | OL597852 | OL598380 | n/a | 24.4010 | 97.2544 |
| *L. canefrii* Vikhrev, Bolotov & Kondakov, 2017 | Myanmar: Ayeyarwady Basin, Mole Stream | RMBH: biv 922/2 | OL597853 | n/a | n/a | 24.4010 | 97.2544 |
| *L. canefrii* Vikhrev, Bolotov & Kondakov, 2017 | Myanmar: Ayeyarwady Basin, Mole Stream | RMBH: biv 922/3 | OL597854 | n/a | n/a | 24.4010 | 97.2544 |
| *L. canefrii* Vikhrev, Bolotov & Kondakov, 2017 | Myanmar: Ayeyarwady Basin, Nant Kaung River | RMBH: biv 934/1 | OL597855 | n/a | n/a | 25.5361 | 96.7267 |
| *L. canefrii* Vikhrev, Bolotov & Kondakov, 2017 | Myanmar: Ayeyarwady Basin, Nant Kaung River | RMBH: biv 934/2 | OL597856 | n/a | n/a | 25.5361 | 96.7267 |
| *L. canefrii* Vikhrev, Bolotov & Kondakov, 2017 | Myanmar: Ayeyarwady Basin, Nant Kaung River | RMBH: biv 934/3 | OL597857 | n/a | n/a | 25.5361 | 96.7267 |
| *L. burmana* (Blanford, 1869) | Myanmar: Ayeyarwady River near Tha Phan Kone village | RMBH: biv 424/1 | MK372441 | n/a | n/a | 21.2566 | 94.9848 |
| *L. burmana* (Blanford, 1869) | Myanmar: Ayeyarwady River near Tha Phan Kone village | RMBH: biv 424/2 | MK372442 | MK372473 | MK372505 | 21.2566 | 94.9848 |
| *L. burmana* (Blanford, 1869) | Myanmar: Ayeyarwady River near Tha Phan Kone village | RMBH: biv 424/3 | MK372443 | MK372474 | MK372506 | 21.2566 | 94.9848 |
| *L. burmana* (Blanford, 1869) | Myanmar: Ayeyarwady River near Mandalay city | RMBH: biv 443/3 | MK372447 | n/a | n/a | 21.8893 | 95.9978 |
| *L. burmana* (Blanford, 1869) | Myanmar: Ayeyarwady River near Mandalay city | RMBH: biv 445/1 | MK372448 | n/a | n/a | 21.8893 | 95.9978 |
| *L. burmana* (Blanford, 1869) | Myanmar: Ayeyarwady River near Tant Kyi village | RMBH: biv 419/2 | MK372437 | n/a | n/a | 21.1567 | 94.8050 |
| *L. burmana* (Blanford, 1869) | Myanmar: Ayeyarwady River near Tant Kyi village | RMBH: biv 419/3 | MK372438 | MK372470 | MK372502 | 21.1567 | 94.8050 |
| *L. burmana* (Blanford, 1869) | Myanmar: Ayeyarwady Basin, Chindwin River | RMBH: biv 350/1 | MK372412 | MK372460 | MK372490 | 23.1499 | 94.3629 |
| *L. burmana* (Blanford, 1869) | Myanmar: Ayeyarwady Basin, Chindwin River | RMBH: biv 350/2 | MK372413 | MK372461 | MK372491 | 23.1499 | 94.3629 |
| *L. tavoyensis* (Gould, 1843) | Myanmar: Dawei River | RMBH: biv 149 | KX230543 | KX230554 | KX230565 | 14.5013 | 98.1558 |
| *L. tavoyensis* (Gould, 1843) | Myanmar: Ayeyarwady Basin, Lake Myaung | RMBH: biv 266/4 | MF352280 | MF352343 | MF352400 | 24.2387 | 97.1658 |
| *L. tavoyensis* (Gould, 1843) | Myanmar: Ayeyarwady Basin, Lake Myaung | RMBH: biv 266/5 | MF352281 | MF352344 | MF352401 | 24.2387 | 97.1658 |
| *L. tavoyensis* (Gould, 1843) | Myanmar: Ayeyarwady Basin, Lake Myaung | RMBH: biv 266/6 | MF352282 | MF352345 | MF352402 | 24.2387 | 97.1658 |
| *L. tavoyensis* (Gould, 1843) | Myanmar: Haungthayaw River | RMBH: biv 362/1 | MK372423 | n/a | MK372499 | 16.4714 | 98.2183 |
| *L. tavoyensis* (Gould, 1843) | Myanmar: Haungthayaw River | RMBH: biv 362/2 | MK372424 | n/a | n/a | 16.4714 | 98.2183 |
| *L. tavoyensis* (Gould, 1843) | Myanmar: Haungthayaw River | RMBH: biv 362/3 | MK372425 | n/a | n/a | 16.4714 | 98.2183 |
| *L. tavoyensis* (Gould, 1843) | Myanmar: Salween Basin, Mizan Stream | RMBH: biv 367/1 | OL597858 | n/a | n/a | 16.9770 | 97.6330 |
| *L. tavoyensis* (Gould, 1843) | Myanmar: Salween Basin, Mizan Stream | RMBH: biv 367/2 | OL597859 | n/a | OL598415 | 16.9770 | 97.6330 |
| *L. tavoyensis* (Gould, 1843) | Myanmar: Salween Basin, Mizan Stream | RMBH: biv 367/3 | OL597860 | n/a | n/a | 16.9770 | 97.6330 |
| *L. tavoyensis* (Gould, 1843) | Myanmar: Ayeyarwady River near Tha Phan Kone village | RMBH: biv 425/1 | OL597861 | n/a | n/a | 21.2566 | 94.9848 |
| *L. tavoyensis* (Gould, 1843) | Myanmar: Ayeyarwady River near Tha Phan Kone village | RMBH: biv 425/3 | OL597862 | n/a | OL598416 | 21.2566 | 94.9848 |
| *L. tavoyensis* (Gould, 1843) | Myanmar: Ayeyarwady River near Mandalay city | RMBH: biv 447/1 | OL597863 | n/a | n/a | 21.8893 | 95.9978 |
| *L. tavoyensis* (Gould, 1843) | Myanmar: Ayeyarwady River near Mandalay city | RMBH: biv 447/2 | OL597864 | n/a | n/a | 21.8893 | 95.9978 |
| *L. tavoyensis* (Gould, 1843) | Myanmar: Tanintharyi River | RMBH: biv 634/1 | OL597865 | OL598381 | OL598417 | 12.2523 | 99.0402 |
| *L. tavoyensis* (Gould, 1843) | Myanmar: Tanintharyi River | RMBH: biv 634/2 | OL597866 | OL598382 | OL598418 | 12.2523 | 99.0402 |
| *L. tavoyensis* (Gould, 1843) | Myanmar: Tanintharyi River | RMBH: biv 634/3 | OL597867 | OL598383 | OL598419 | 12.2523 | 99.0402 |
| *L. tavoyensis* (Gould, 1843) | Myanmar: Tanintharyi River | RMBH: biv 635/1 | OL597868 | n/a | n/a | 12.0914 | 99.0174 |
| *L. tavoyensis* (Gould, 1843) | Myanmar: Tanintharyi River | RMBH: biv 635/2 | OL597869 | n/a | n/a | 12.0914 | 99.0174 |
| *L. tavoyensis* (Gould, 1843) | Myanmar: Tanintharyi River | RMBH: biv 635/3 | OL597870 | n/a | n/a | 12.0914 | 99.0174 |
| *L. tavoyensis* (Gould, 1843) | Myanmar: Tanintharyi Basin, Nga Wun River | RMBH: biv 646/2 | OL597871 | n/a | n/a | 11.8233 | 99.1493 |
| *L. whitteni* Bolotov et al., 2019 | Myanmar: Ayeyarwady Basin, Chindwin River | RMBH: biv 349 | MK372411 | MK372459 | MK372489 | 23.1918 | 94.3217 |
| *L. whitteni* Bolotov et al., 2019 | Myanmar: Ayeyarwady River | RMBH: biv 435 | MK372446 | MK372475 | MK372507 | 21.9574 | 96.0510 |
| *L. whitteni* Bolotov et al., 2019 | Myanmar: Ayeyarwady River | RMBH: biv 449 | MK372449 | MK372476 | MK372508 | 21.8893 | 95.9978 |
| **Outgroup Taxa** |  |  |  |  |  |  |  |
| **MARGARITIFERIDAE Henderson, 1929** | | | | | |  |  |
| *Gibbosula laosensis* (Lea, 1863) | Laos: Mekong Basin, Nam Long River | IEPN-Mekong-La-1 | JX497731 | KC845943 | KT343741 |  |  |
| *Margaritifera dahurica* (Middendorff,1850) | Far East of Russia: Amur Basin, Ilistaya River | IEPN d0088/6 | KJ161516 | KJ943526 | KT343747 |  |  |
| **Gonideini s.s.** | | | | | | | |
| *Solenaia oleivora* (Heude, 1877) sp. 1 | China | 16_NCU_XPWU_SU181 | MG463091 | n/a | MG595618 |  |  |
| *Leguminaia wheatleyi* (Lea, 1862) | Turkey: Karasu River | RMBH: biv 177/7 | MN402614 | MN396725 | MN396721 |  |  |
| *Gonidea angulata* (Lea, 1838) | Canada: Okanagan lake | RMBH: biv 294/1 | MN402615 | MN396726 | MN396722 |  |  |
| **Lamprotulini Modell, 1942** | | | | | | | |
| *Lamprotula leaii* (Griffith & Pidgeon, 1833) | Vietnam | RMBH: biv 200/1 | MN402616 | MN396727 | MN396723 |  |  |
| *Potomida littoralis* (Cuvier, 1798) | Turkey: Karasu River | RMBH: biv 177/10 | MN402617 | MN396728 | MN396724 |  |  |
