# Supplementary material for: Follow the Footsteps of Leonardo Fea: An Example of an Integrative Revision of Freshwater Mussel Taxa Described from the Former British Burma (Myanmar)
Source: Hindawi journal article supplement (doi:10.1155/2022/6600359), 2022-05-27
Supplement: f1 [file 6600359.f1.zip › Table S2.docx]

**Table S2.** The best-fit models of nucleotide substitution and partition scheme.

| **Tribe** | **Model used in ML analyses (IQ-TREE)** | | | **Model used in Bayesian analyses (MrBayes)** | | |
| --- | --- | --- | --- | --- | --- | --- |
| **1st codon of *COI*** | **2nd codon of *COI*** | **3rd codon of *COI*** | **1st codon of *COI*** | **2nd codon of *COI*** | **3rd codon of *COI*** |
| Indochinellini dataset | F81 | TIM3+ G | TN+G | The same models | | |
| Lamellidentini dataset | F81 | TN+G | TN+G | The same models | | |
| Leoparreysiini dataset | F81 | HKY | TN+G | The same models | | |
| Contradentini dataset | F81+I | TIM3+G | TN+G | GTR + G | | |
