# Supplementary material for: Follow the Footsteps of Leonardo Fea: An Example of an Integrative Revision of Freshwater Mussel Taxa Described from the Former British Burma (Myanmar)
Source: Hindawi journal article supplement (doi:10.1155/2022/6600359), 2022-05-27
Supplement: f1 [file 6600359.f1.zip › Table S3.docx]

**Table S3.** Genetic divergences (mean uncorrected p-distances, %) from *Trapezoideus mitanensis* **sp. nov.** and its congeners based on the mitochondrial COI gene sequences.

| **Species** | *T. foliaceus* | *T. subvirudus* | *T. lenya* |
| --- | --- | --- | --- |
| *T. subvirudus* | 6.3±0.9 |  |  |
| *T. lenya* | 4.6±0.7 | 5.9±0.9 |  |
| *T. mitanensis* **sp. nov.** | 6.2±0.9 | 6.6±0.9 | 5.4±0.8 |
