# Supplementary material for: Follow the Footsteps of Leonardo Fea: An Example of an Integrative Revision of Freshwater Mussel Taxa Described from the Former British Burma (Myanmar)
Source: Hindawi journal article supplement (doi:10.1155/2022/6600359), 2022-05-27
Supplement: f1 [file 6600359.f1.zip › Table S4.docx]

**Table S4.** Shell parameters (mm) and reference DNA sequences for the type series of *Trapezoideus mitanensis* **sp. nov.** from Myanmar.

| **Status of Specimen** | **Specimen Voucher*** | **Shell Length, mm** | **Shell Height, mm** | **Shell Width, mm** | **NCBI’s GenBank acc. nos.** | | |
| --- | --- | --- | --- | --- | --- | --- | --- |
| ***COI*** | ***16S rRNA*** | ***28S rRNA*** |
| Holotype | RMBH biv 1021/1 | 37.1 | 20.8 | 12.3 | OL597613 | ON142670 | ON171238 |
| Paratype | RMBH biv 1021/2 | 32.6 | 19.7 | 10.8 | OL597614 | OL598370 | OL598384 |
| Paratype | RMBH biv 1021/3 | 38.8 | 20.7 | 12.0 | OL597615 | n/a | n/a |
| Paratype | RMBH biv 1021/4 | 33.8 | 18.8 | 10.9 | n/a | n/a | n/a |
| Paratype | RMBH biv 1021/5 | 33.4 | 18.7 | 10.3 | n/a | n/a | n/a |
| Paratype | RMBH biv 1021/6 | 30.7 | 17.1 | 9.9 | n/a | n/a | n/a |
| Paratype | RMBH biv 1021/7 | 29.1 | 16.6 | 8.7 | n/a | n/a | n/a |
| Paratype | RMBH biv 1021/8 | 29.8 | 16.0 | 9.1 | n/a | n/a | n/a |
| Paratype | RMBH biv 1021/9 | 27.4 | 16.0 | 8.8 | n/a | n/a | n/a |
| Paratype | RMBH biv 1021/10 | 27.1 | 15.9 | 8.6 | n/a | n/a | n/a |
| Paratype | RMBH biv 1022/1 | 27.1 | 15.9 | 8.7 | OL597616 | OL598371 | OL598385 |
| Paratype | RMBH biv 1022/2 | 27.0 | 16.3 | 9.2 | OL597617 | OL598372 | OL598386 |
