# Supplementary figures and images for: Follow the Footsteps of Leonardo Fea: An Example of an Integrative Revision of Freshwater Mussel Taxa Described from the Former British Burma (Myanmar)
Source: Hindawi journal article supplement (doi:10.1155/2022/6600359), 2022-05-27

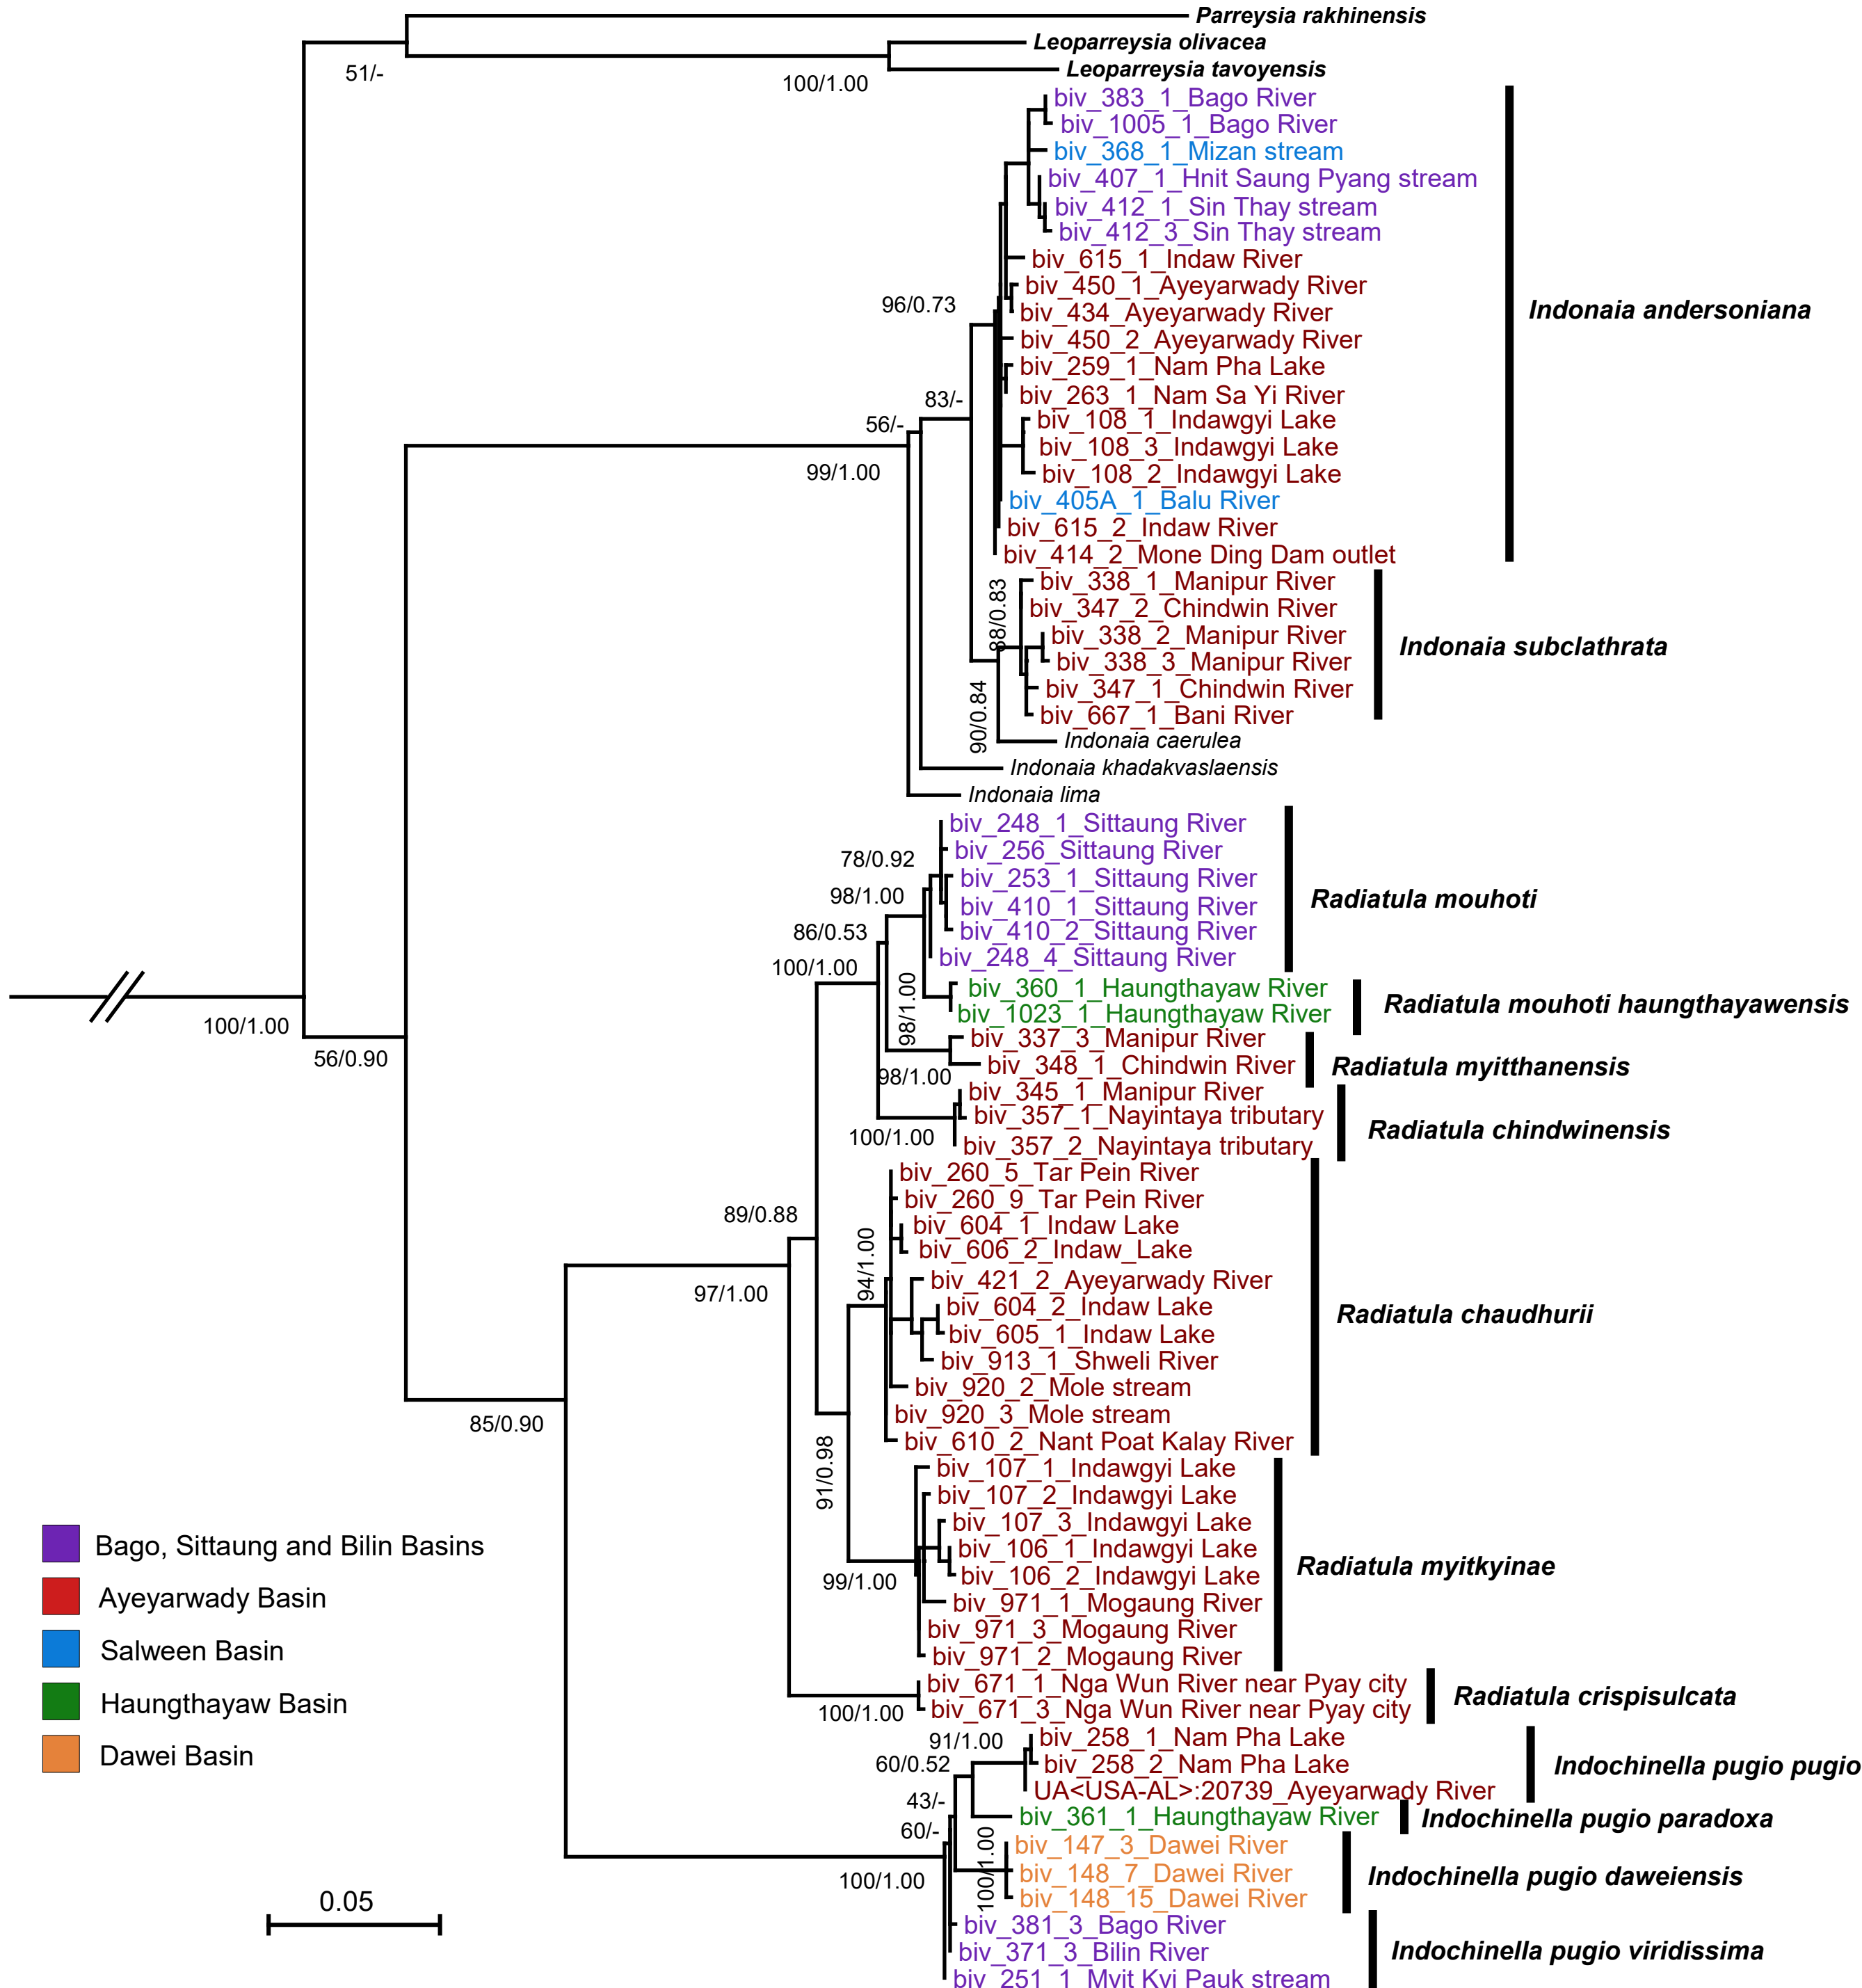

Supplement: f1 [file 6600359.f1.zip]

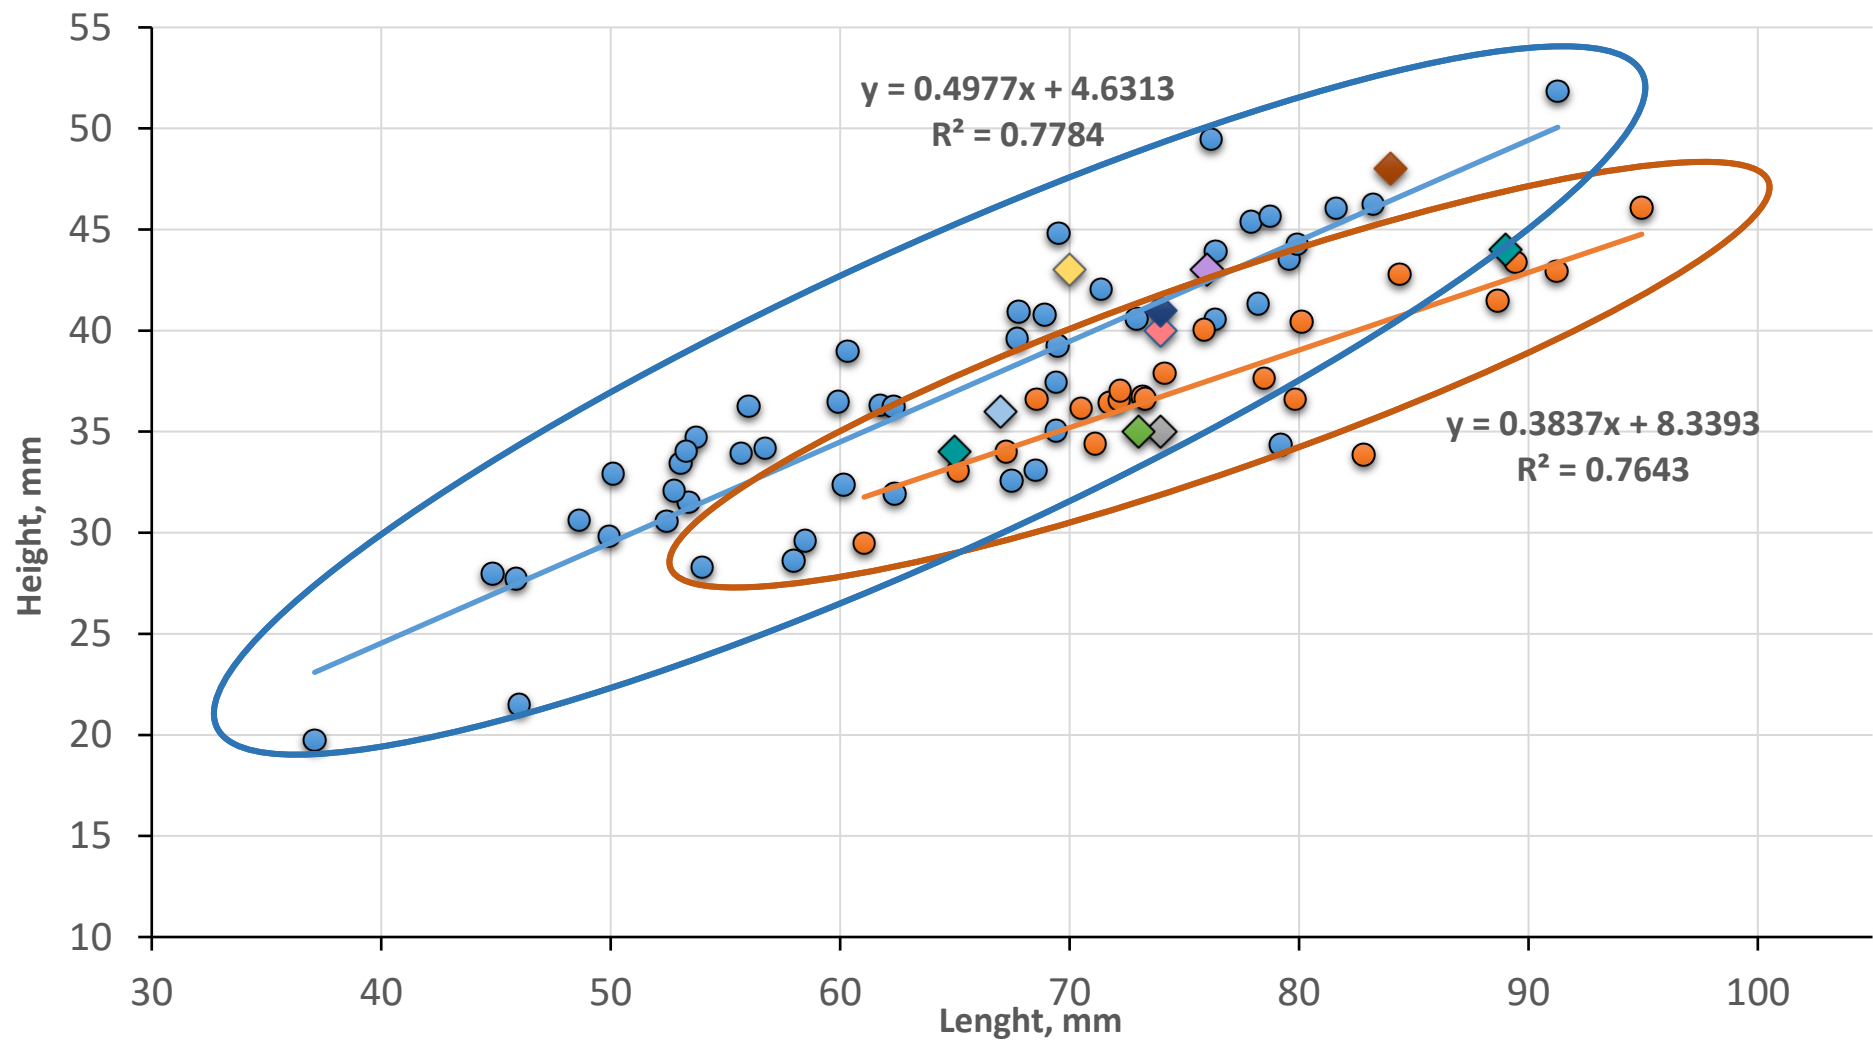

Supplement: f1 [file 6600359.f1.zip › Figure S1 (2).pdf]

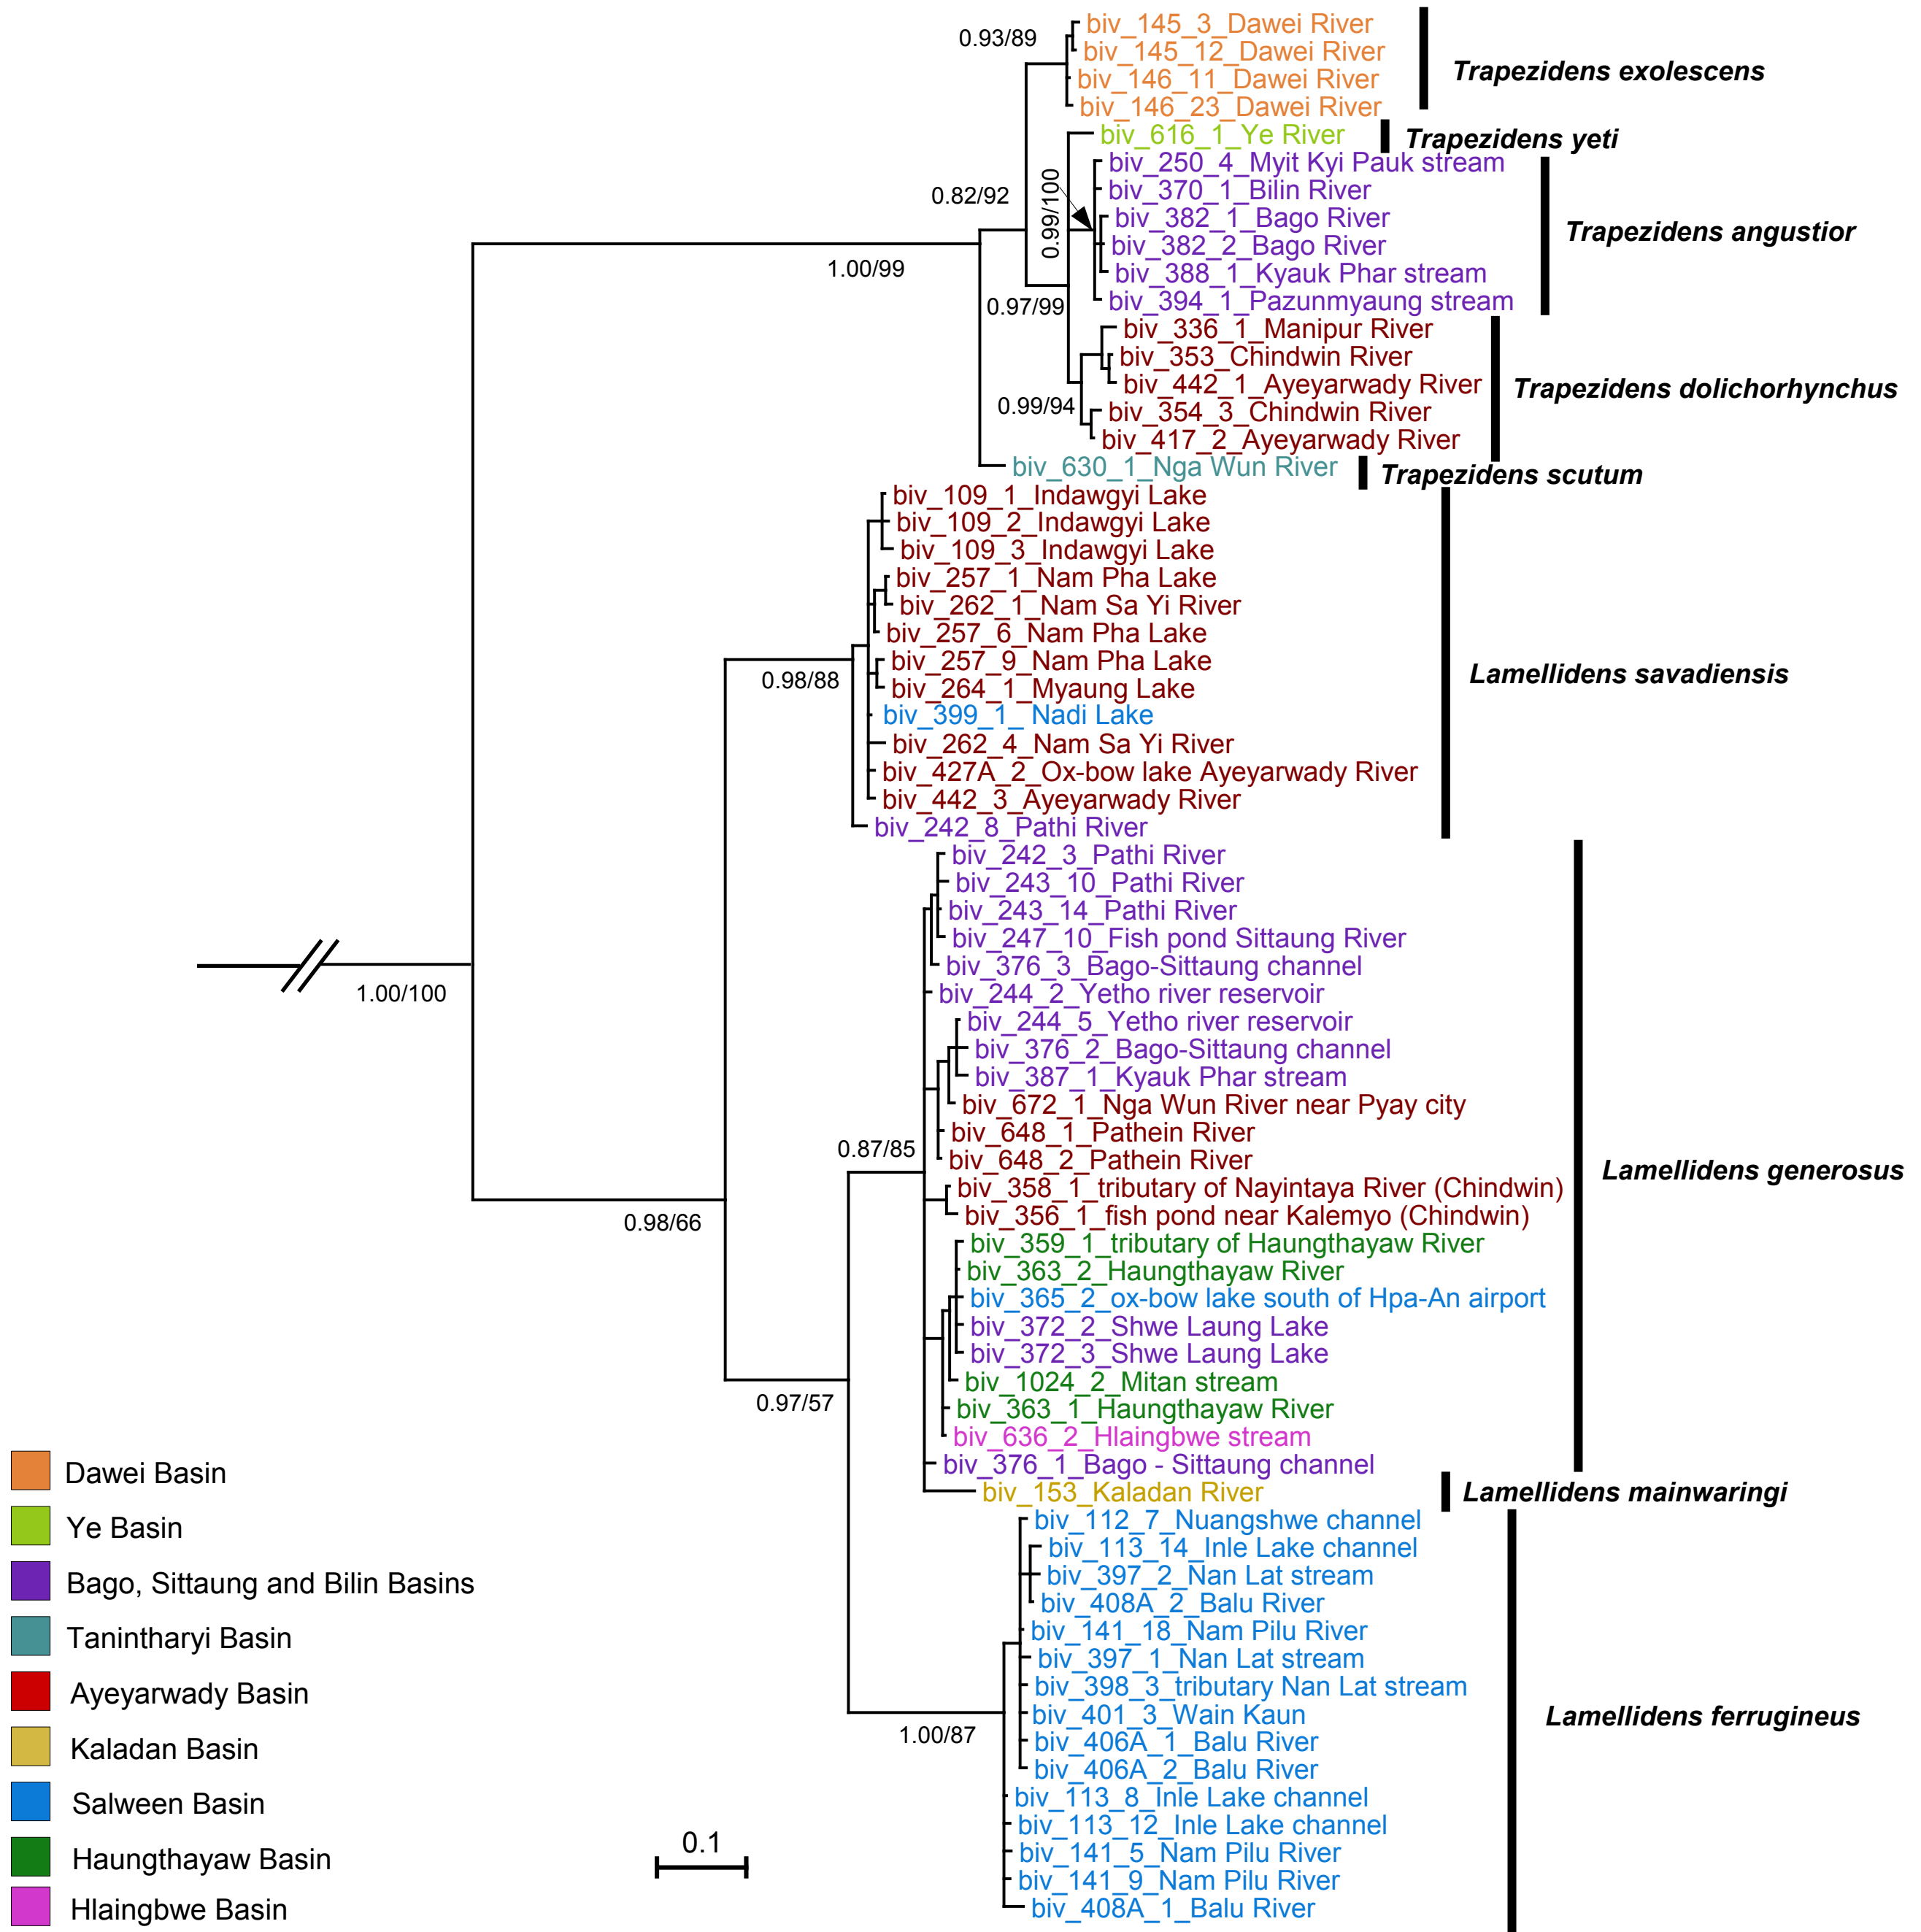

Supplement: f1 [file 6600359.f1.zip › Figure S4 (2).pdf]

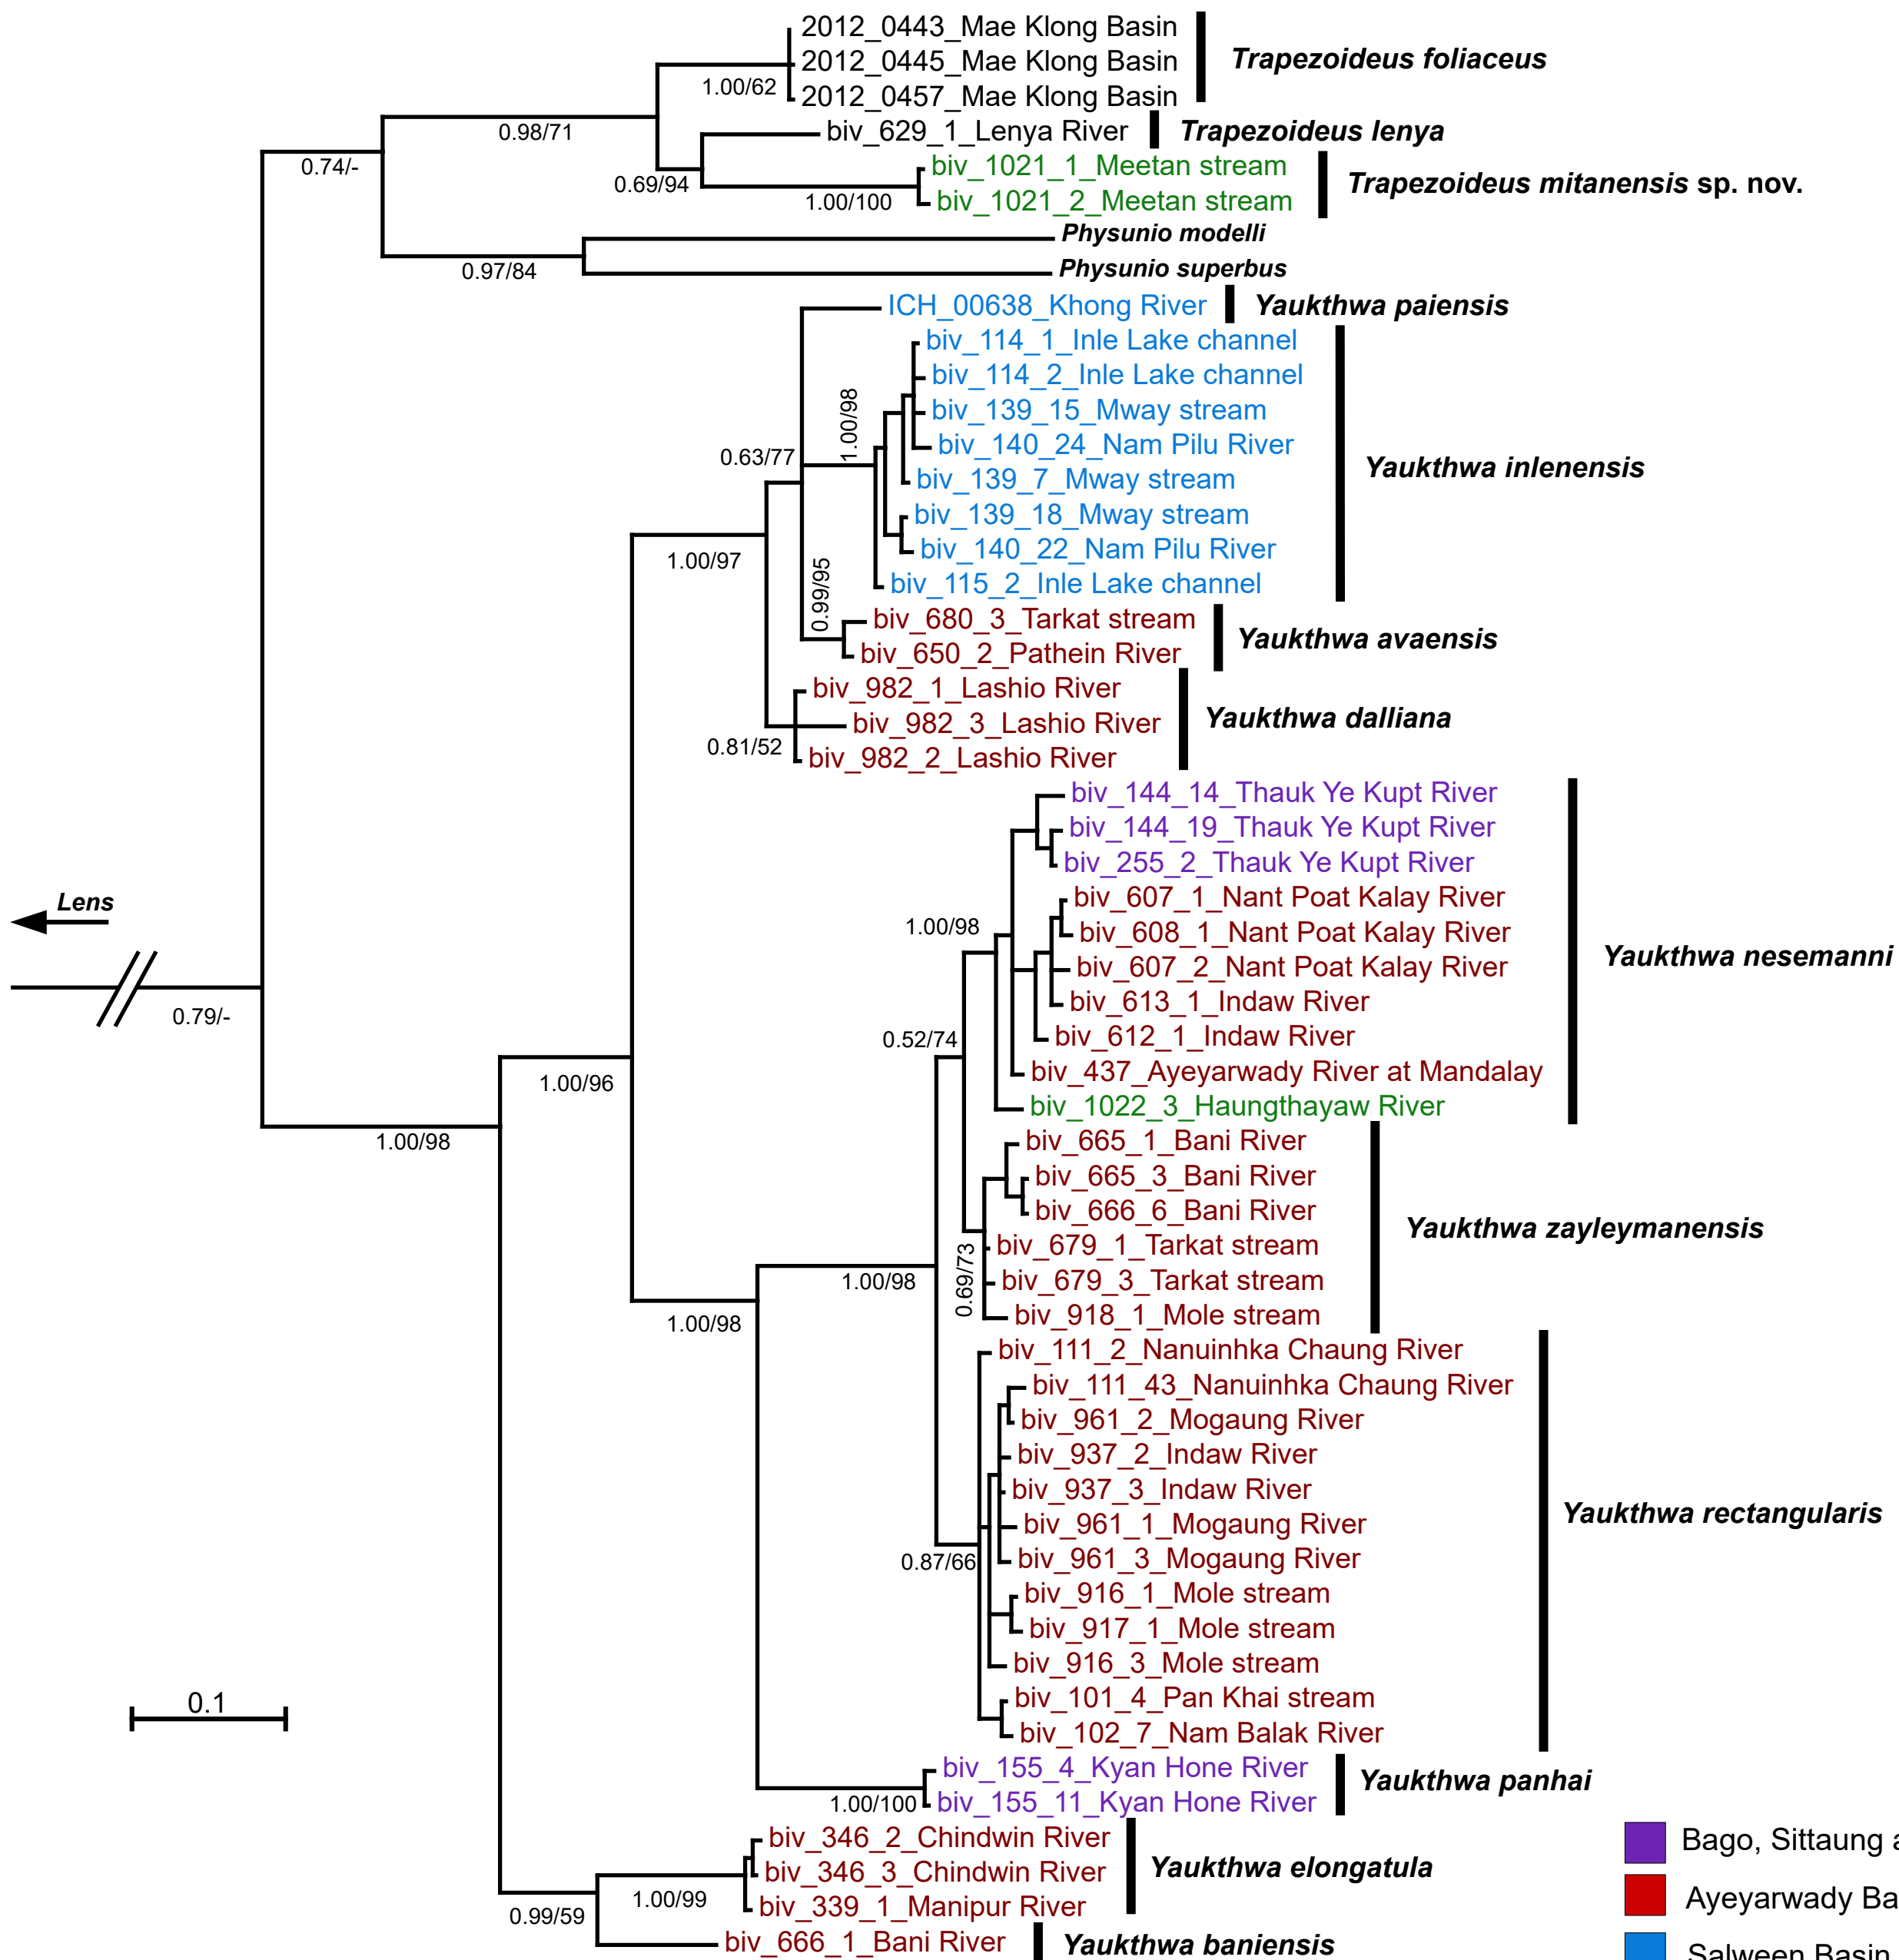

- Bago, Sittaung and Bilin Basins
- Ayeyarwady Basin
- Salween Basin
- Haungthayaw Basin

Supplement: f1 [file 6600359.f1.zip › Figure S5 (2).pdf]
